# Supplementary material for: Compression of Aggregates of Acid‐Leached Coal Gangues: Implications for Coal Mine Backfill
Source: Hindawi journal article supplement (doi:10.1155/2018/7056430), 2018-01-01
Supplement: f1 [file 7056430.f1.zip]

Archive with 3 entries (3 files):
- 7056430.f1/1 Data of figure 3.xlsx
- 7056430.f1/2 Data of figure 4.xlsx
- 7056430.f1/3 Data of figure 6.xlsx
