# Supplementary material for: Compression of Aggregates of Acid‐Leached Coal Gangues: Implications for Coal Mine Backfill
Source: Hindawi journal article supplement (doi:10.1155/2018/7056430), 2018-01-01
Supplement: f1 [file 7056430.f1.zip › 7056430.f1/1 Data of figure 3.xlsx]

## Sheet: Analysis of pH Evolution Trends
Time	S-P 15-20（3）	S-P 10-15（3）	S-P 5-10（3）	S-P 15-20（5）	S-P 10-15（5）	S-P 5-10（5）	S-P 15-20（7）	S-P 10-15（7）	S-P 5-10（7）
0	3	3	3	5	5	5	8	8	8
12	5.2	5.8	6.2	6.5	6.6	7.1	8.5	8.8	9
24	6.8	7.2	7.6	7.8	7.7	8.4	9	9.3	9.5
48	7.4	7.9	8.5	8.3	8.4	8.9	9.2	9.3	9.4
72	7.7	8.1	8.7	8.6	8.7	9	9.1	9.2	9.3
96	8	8.5	8.7	8.8	8.8	9.1	9.3	9.3	9.2
120	8.1	8.6	8.7	8.8	8.9	9	9.2	9.2	9.2
144	8.2	8.6	8.8	8.8	8.9	9	9.2	9.2	9.2
168	8.4	8.7	8.9	8.9	8.9	9.1	9.2	9.2	9.1
192	8.5	8.8	8.8	8.9	8.9	9	9.2	9.2	9.2
216	8.5	8.8	8.8	8.9	8.9	9	9.2	9.2	9.2
240	8.7	8.9	9	9	9	9.1	9.3	9.2	9.2
