# Supplementary material for: Compression of Aggregates of Acid‐Leached Coal Gangues: Implications for Coal Mine Backfill
Source: Hindawi journal article supplement (doi:10.1155/2018/7056430), 2018-01-01
Supplement: f1 [file 7056430.f1.zip › 7056430.f1/2 Data of figure 4.xlsx]

## Sheet: pH = 3，Stress-Strain 
Stress	SP5-10(3)	Stress	SP10-15(3)	Stress	SP15-20(3)
0	0	0	0	0	0
0.10068	0.02012	0.10064	0.02833	0.10033	0.0284
0.10078	0.02017	0.10018	0.02833	0.10028	0.0284
0.10149	0.02017	0.10046	0.02833	0.10054	0.02845
0.10094	0.02017	0.10113	0.02838	0.09963	0.02845
0.10103	0.02017	0.10136	0.02838	0.09977	0.02845
0.10164	0.02017	0.10045	0.02838	0.09926	0.02845
0.1009	0.02021	0.10192	0.02838	0.09871	0.0285
0.10127	0.02021	0.10431	0.02842	0.09903	0.0285
0.1021	0.02021	0.10203	0.02842	0.09976	0.0285
0.0998	0.02021	0.10274	0.02842	0.0987	0.0285
0.10085	0.02021	0.1026	0.02842	0.09982	0.0285
0.10018	0.02025	0.10132	0.02842	0.10023	0.0285
0.10025	0.02025	0.10283	0.02847	0.09894	0.02854
0.1019	0.02025	0.10205	0.02847	0.0988	0.02854
0.10076	0.02025	0.10215	0.02847	0.09889	0.02854
0.10152	0.0203	0.10318	0.02847	0.09917	0.02854
0.1008	0.0203	0.10265	0.02847	0.0999	0.02854
0.10181	0.0203	0.09373	0.02851	0.09866	0.02859
0.10374	0.0203	0.10201	0.02851	0.09972	0.02859
0.10281	0.0203	0.10201	0.02851	0.09926	0.02859
0.11005	0.02034	0.10364	0.02851	0.10134	0.02859
0.10283	0.02034	0.10344	0.02851	0.10117	0.02863
0.10385	0.02034	0.10321	0.02856	0.09996	0.02863
0.10287	0.02034	0.10371	0.02856	0.10101	0.02863
0.10355	0.02034	0.10383	0.02856	0.10168	0.02863
0.10255	0.02039	0.10439	0.02856	0.10233	0.02863
0.10301	0.02039	0.11469	0.0286	0.10127	0.02868
0.10247	0.02039	0.10406	0.0286	0.10201	0.02868
0.10269	0.02039	0.10411	0.0286	0.10166	0.02868
0.10224	0.02039	0.1048	0.0286	0.10237	0.02868
0.09282	0.02043	0.10362	0.0286	0.10178	0.02868
0.10261	0.02043	0.10408	0.02865	0.10279	0.02872
0.10309	0.02043	0.10434	0.02865	0.10269	0.02872
0.10187	0.02043	0.10433	0.02865	0.10325	0.02872
0.10159	0.02043	0.10494	0.02865	0.10242	0.02872
0.10323	0.02047	0.10604	0.02865	0.10417	0.02872
0.10311	0.02047	0.09605	0.02869	0.10324	0.02877
0.10261	0.02047	0.10375	0.02869	0.10413	0.02877
0.10346	0.02047	0.10413	0.02869	0.10494	0.02877
0.10267	0.02047	0.10329	0.02869	0.10468	0.02877
0.1027	0.02052	0.1052	0.02869	0.10503	0.02877
0.10374	0.02052	0.10517	0.02874	0.10608	0.02882
0.10498	0.02052	0.10434	0.02874	0.10567	0.02882
0.10475	0.02052	0.10456	0.02874	0.10558	0.02882
0.10507	0.02056	0.10443	0.02874	0.1038	0.02882
0.10474	0.02056	0.10442	0.02874	0.10613	0.02882
0.10568	0.02056	0.10572	0.02878	0.10539	0.02886
0.10411	0.02056	0.10631	0.02878	0.10581	0.02886
0.1043	0.02056	0.10511	0.02878	0.1053	0.02886
0.09589	0.0206	0.10646	0.02878	0.1048	0.02886
0.10438	0.0206	0.10603	0.02883	0.10408	0.02891
0.10385	0.0206	0.10494	0.02883	0.10434	0.02891
0.10401	0.0206	0.10581	0.02883	0.10535	0.02891
0.10298	0.0206	0.10563	0.02883	0.10567	0.02891
0.10321	0.02065	0.10544	0.02883	0.1052	0.02891
0.10448	0.02065	0.09941	0.02887	0.10631	0.02895
0.1032	0.02065	0.10452	0.02887	0.10452	0.02895
0.10401	0.02065	0.10634	0.02887	0.10549	0.02895
0.1105	0.02069	0.10536	0.02887	0.10461	0.02895
0.10539	0.02069	0.10623	0.02887	0.10466	0.02895
0.10484	0.02069	0.10594	0.02892	0.10613	0.029
0.10503	0.02069	0.10655	0.02892	0.10563	0.029
0.1047	0.02069	0.10548	0.02892	0.10545	0.029
0.10428	0.02074	0.10536	0.02892	0.1054	0.029
0.10437	0.02074	0.10699	0.02892	0.10568	0.02905
0.10415	0.02074	0.11762	0.02896	0.10595	0.02905
0.10337	0.02074	0.10801	0.02896	0.10471	0.02905
0.10425	0.02074	0.10828	0.02896	0.10599	0.02905
0.0984	0.02078	0.10815	0.02896	0.10581	0.02905
0.10306	0.02078	0.1074	0.02896	0.10571	0.02905
0.10275	0.02078	0.10787	0.02901	0.10512	0.02909
0.10399	0.02078	0.10824	0.02901	0.10674	0.02909
0.10302	0.02078	0.10796	0.02901	0.10589	0.02909
0.10429	0.02082	0.10767	0.02901	0.10544	0.02909
0.1032	0.02082	0.10818	0.02901	0.10566	0.02909
0.10419	0.02082	0.10823	0.02905	0.10573	0.02914
0.10318	0.02082	0.10772	0.02905	0.10539	0.02914
0.10369	0.02082	0.10759	0.02905	0.10724	0.02914
0.10795	0.02087	0.10814	0.02905	0.10558	0.02914
0.10553	0.02087	0.10936	0.0291	0.10673	0.02918
0.10611	0.02087	0.10814	0.0291	0.10604	0.02918
0.10558	0.02087	0.10915	0.0291	0.10604	0.02918
0.10452	0.02087	0.10804	0.0291	0.10562	0.02918
0.10662	0.02091	0.10911	0.0291	0.10631	0.02918
0.10583	0.02091	0.11935	0.02914	0.10682	0.02923
0.1057	0.02091	0.10924	0.02914	0.10781	0.02923
0.10451	0.02091	0.10968	0.02914	0.10553	0.02923
0.10545	0.02091	0.10992	0.02914	0.10708	0.02923
0.1047	0.02096	0.10809	0.02914	0.1065	0.02928
0.10516	0.02096	0.10855	0.02919	0.1071	0.02928
0.10502	0.02096	0.10828	0.02919	0.10646	0.02928
0.1048	0.02096	0.10805	0.02919	0.10715	0.02928
0.10434	0.02096	0.10966	0.02919	0.10763	0.02928
0.10542	0.021	0.11001	0.02919	0.10746	0.02928
0.10429	0.021	0.10898	0.02923	0.10738	0.02932
0.10531	0.021	0.1081	0.02923	0.10754	0.02932
0.10558	0.021	0.10934	0.02923	0.10787	0.02932
0.11435	0.02104	0.10915	0.02923	0.10851	0.02932
0.10731	0.02104	0.1095	0.02923	0.10727	0.02932
0.10736	0.02104	0.10973	0.02928	0.10991	0.02937
0.10698	0.02104	0.10997	0.02928	0.1101	0.02937
0.10693	0.02104	0.10847	0.02928	0.10997	0.02937
0.10479	0.02109	0.10932	0.02928	0.11006	0.02937
0.10563	0.02109	0.11838	0.02932	0.11065	0.02937
0.1063	0.02109	0.10992	0.02932	0.11079	0.02941
0.10759	0.02109	0.10892	0.02932	0.11092	0.02941
0.10383	0.02113	0.10879	0.02932	0.11076	0.02941
0.10447	0.02113	0.10943	0.02932	0.11134	0.02941
0.106	0.02113	0.10983	0.02937	0.11094	0.02946
0.10514	0.02113	0.1098	0.02937	0.11052	0.02946
0.10511	0.02113	0.10906	0.02937	0.11029	0.02946
0.10707	0.02113	0.10865	0.02937	0.11084	0.02946
0.10662	0.02117	0.10846	0.02937	0.11177	0.02946
0.10662	0.02117	0.10603	0.02941	0.11102	0.0295
0.10708	0.02117	0.10553	0.02941	0.11098	0.0295
0.10662	0.02117	0.10563	0.02941	0.11331	0.0295
0.10867	0.02117	0.1059	0.02941	0.11208	0.0295
0.10876	0.02122	0.10692	0.02941	0.1118	0.0295
0.108	0.02122	0.10567	0.02946	0.11236	0.02955
0.10795	0.02122	0.10726	0.02946	0.11199	0.02955
0.10876	0.02122	0.10576	0.02946	0.11341	0.02955
0.10881	0.02126	0.10657	0.02946	0.11294	0.02955
0.10845	0.02126	0.11121	0.0295	0.11349	0.02955
0.10858	0.02126	0.10731	0.0295	0.11419	0.0296
0.10887	0.02126	0.10668	0.0295	0.11381	0.0296
0.10908	0.02126	0.10721	0.0295	0.11387	0.0296
0.10145	0.02131	0.10694	0.0295	0.11336	0.0296
0.10667	0.02131	0.10745	0.02955	0.11349	0.0296
0.10784	0.02131	0.10744	0.02955	0.11327	0.02964
0.10761	0.02131	0.10687	0.02955	0.11369	0.02964
0.10698	0.02131	0.10712	0.02955	0.11294	0.02964
0.10831	0.02135	0.10715	0.02955	0.11349	0.02964
0.1069	0.02135	0.10594	0.02955	0.11401	0.02964
0.1074	0.02135	0.10597	0.02959	0.11455	0.02969
0.10798	0.02135	0.10591	0.02959	0.11532	0.02969
0.10896	0.02135	0.10712	0.02959	0.11381	0.02969
0.1199	0.02139	0.10544	0.02959	0.11404	0.02969
0.10782	0.02139	0.10457	0.02959	0.11369	0.02969
0.10863	0.02139	0.1054	0.02964	0.11522	0.02973
0.10955	0.02139	0.10611	0.02964	0.11488	0.02973
0.11025	0.02139	0.10645	0.02964	0.11513	0.02973
0.1074	0.02144	0.10722	0.02964	0.11442	0.02973
0.10917	0.02144	0.11734	0.02968	0.11485	0.02978
0.10885	0.02144	0.10741	0.02968	0.11432	0.02978
0.10947	0.02144	0.10768	0.02968	0.11431	0.02978
0.1095	0.02144	0.10806	0.02968	0.11422	0.02978
0.10768	0.02148	0.10787	0.02968	0.11432	0.02978
0.10859	0.02148	0.10713	0.02973	0.11501	0.02983
0.10759	0.02148	0.10893	0.02973	0.11487	0.02983
0.108	0.02148	0.10819	0.02973	0.11417	0.02983
0.10882	0.02148	0.1066	0.02973	0.11327	0.02983
0.10901	0.02153	0.10182	0.02977	0.11441	0.02983
0.10764	0.02153	0.09757	0.02977	0.11363	0.02987
0.10886	0.02153	0.10634	0.02977	0.11501	0.02987
0.10768	0.02153	0.10632	0.02977	0.1158	0.02987
0.11841	0.02157	0.10752	0.02977	0.11423	0.02987
0.10909	0.02157	0.108	0.02977	0.11476	0.02987
0.10959	0.02157	0.10845	0.02982	0.11478	0.02992
0.10918	0.02157	0.1086	0.02982	0.11524	0.02992
0.1095	0.02157	0.10818	0.02982	0.11534	0.02992
0.10882	0.02157	0.10682	0.02982	0.11555	0.02992
0.10983	0.02161	0.10769	0.02982	0.11441	0.02996
0.10937	0.02161	0.10918	0.02986	0.11459	0.02996
0.10886	0.02161	0.11022	0.02986	0.11464	0.02996
0.1095	0.02161	0.10987	0.02986	0.11628	0.02996
0.10306	0.02166	0.10915	0.02986	0.11601	0.02996
0.10873	0.02166	0.1093	0.02991	0.11395	0.03001
0.10877	0.02166	0.10901	0.02991	0.11478	0.03001
0.10955	0.02166	0.10966	0.02991	0.11492	0.03001
0.10873	0.02166	0.10962	0.02991	0.11456	0.03001
0.10885	0.0217	0.10842	0.02991	0.11531	0.03001
0.10867	0.0217	0.1014	0.02995	0.11394	0.03006
0.11011	0.0217	0.10841	0.02995	0.11451	0.03006
0.10904	0.0217	0.10838	0.02995	0.11331	0.03006
0.10978	0.0217	0.10874	0.02995	0.11354	0.03006
0.11362	0.02175	0.10828	0.02995	0.11536	0.0301
0.11115	0.02175	0.10906	0.03	0.11381	0.0301
0.11066	0.02175	0.10832	0.03	0.11324	0.0301
0.11247	0.02175	0.10932	0.03	0.11445	0.0301
0.1111	0.02179	0.1101	0.03	0.11377	0.0301
0.11151	0.02179	0.10982	0.03	0.11473	0.0301
0.11206	0.02179	0.11083	0.03004	0.11312	0.03015
0.11151	0.02179	0.10982	0.03004	0.11377	0.03015
0.11164	0.02179	0.11106	0.03004	0.11404	0.03015
0.10182	0.02183	0.10989	0.03004	0.11327	0.03015
0.11179	0.02183	0.10927	0.03004	0.11231	0.03019
0.11201	0.02183	0.11025	0.03009	0.11308	0.03019
0.11234	0.02183	0.11048	0.03009	0.11239	0.03019
0.11133	0.02183	0.10975	0.03009	0.11332	0.03019
0.11211	0.02188	0.11121	0.03009	0.11239	0.03019
0.11215	0.02188	0.10256	0.03013	0.11257	0.03024
0.11216	0.02188	0.10938	0.03013	0.11243	0.03024
0.11303	0.02188	0.10916	0.03013	0.11199	0.03024
0.11408	0.02188	0.10892	0.03013	0.11282	0.03024
0.1241	0.02192	0.11008	0.03013	0.11382	0.03028
0.11463	0.02192	0.10978	0.03018	0.11299	0.03028
0.11408	0.02192	0.10997	0.03018	0.11349	0.03028
0.11418	0.02192	0.11022	0.03018	0.11413	0.03028
0.11516	0.02192	0.10962	0.03018	0.1125	0.03028
0.11471	0.02196	0.11085	0.03018	0.11354	0.03033
0.11395	0.02196	0.11986	0.03022	0.11446	0.03033
0.11518	0.02196	0.11195	0.03022	0.11468	0.03033
0.1138	0.02196	0.11103	0.03022	0.11433	0.03033
0.10576	0.02201	0.11043	0.03022	0.11313	0.03033
0.1143	0.02201	0.11144	0.03027	0.11405	0.03038
0.11499	0.02201	0.11071	0.03027	0.11524	0.03038
0.11413	0.02201	0.11017	0.03027	0.11468	0.03038
0.11502	0.02201	0.11102	0.03027	0.1155	0.03038
0.11261	0.02205	0.1107	0.03027	0.11381	0.03038
0.11431	0.02205	0.10448	0.03031	0.11387	0.03042
0.11444	0.02205	0.11089	0.03031	0.11369	0.03042
0.11562	0.02205	0.11172	0.03031	0.11409	0.03042
0.11499	0.02205	0.10939	0.03031	0.11566	0.03042
0.12433	0.0221	0.11066	0.03031	0.11596	0.03047
0.11542	0.0221	0.11112	0.03031	0.11614	0.03047
0.11564	0.0221	0.11024	0.03036	0.11571	0.03047
0.11586	0.0221	0.11117	0.03036	0.11646	0.03047
0.116	0.02214	0.10918	0.03036	0.11661	0.03047
0.11564	0.02214	0.11043	0.03036	0.11619	0.03051
0.11581	0.02214	0.11469	0.0304	0.11615	0.03051
0.11655	0.02214	0.11234	0.0304	0.11697	0.03051
0.11705	0.02214	0.11171	0.0304	0.1173	0.03051
0.10851	0.02218	0.11177	0.0304	0.11702	0.03051
0.11495	0.02218	0.11203	0.0304	0.1167	0.03056
0.1164	0.02218	0.11167	0.03045	0.11623	0.03056
0.1155	0.02218	0.1127	0.03045	0.11715	0.03056
0.11669	0.02218	0.11215	0.03045	0.11783	0.03056
0.1165	0.02223	0.11185	0.03045	0.11771	0.03056
0.11518	0.02223	0.10586	0.03049	0.11771	0.03061
0.11518	0.02223	0.11075	0.03049	0.11794	0.03061
0.11585	0.02223	0.11345	0.03049	0.11908	0.03061
0.11527	0.02223	0.11303	0.03049	0.11871	0.03061
0.12501	0.02227	0.11299	0.03049	0.11994	0.03061
0.11612	0.02227	0.11231	0.03049	0.11963	0.03065
0.11516	0.02227	0.11239	0.03054	0.11911	0.03065
0.11635	0.02227	0.11248	0.03054	0.11972	0.03065
0.11519	0.02232	0.11176	0.03054	0.11935	0.03065
0.11558	0.02232	0.11215	0.03054	0.12045	0.03065
0.11592	0.02232	0.11112	0.03054	0.1209	0.0307
0.11595	0.02232	0.11322	0.03058	0.11996	0.0307
0.115	0.02232	0.11394	0.03058	0.12115	0.0307
0.11613	0.02232	0.11299	0.03058	0.12045	0.0307
0.11514	0.02236	0.11378	0.03058	0.12055	0.0307
0.11471	0.02236	0.11303	0.03063	0.12055	0.03074
0.11395	0.02236	0.11349	0.03063	0.12055	0.03074
0.11366	0.02236	0.11369	0.03063	0.12032	0.03074
0.11499	0.02236	0.11362	0.03063	0.12083	0.03074
0.11418	0.0224	0.11336	0.03063	0.12293	0.03074
0.11435	0.0224	0.11227	0.03067	0.12108	0.03079
0.11399	0.0224	0.11239	0.03067	0.12154	0.03079
0.11436	0.0224	0.11259	0.03067	0.12182	0.03079
0.1266	0.02245	0.11276	0.03067	0.12196	0.03079
0.11632	0.02245	0.11313	0.03067	0.12274	0.03083
0.11603	0.02245	0.1127	0.03072	0.12145	0.03083
0.11581	0.02245	0.11307	0.03072	0.122	0.03083
0.11353	0.02249	0.11413	0.03072	0.12424	0.03083
0.11525	0.02249	0.11368	0.03072	0.12315	0.03083
0.11578	0.02249	0.11299	0.03072	0.12279	0.03088
0.11627	0.02249	0.1227	0.03076	0.1221	0.03088
0.11532	0.02249	0.1127	0.03076	0.12237	0.03088
0.11608	0.02249	0.11346	0.03076	0.12353	0.03088
0.10396	0.02253	0.11404	0.03076	0.1226	0.03088
0.11339	0.02253	0.11474	0.03076	0.12283	0.03093
0.11407	0.02253	0.11465	0.0308	0.12324	0.03093
0.11353	0.02253	0.11414	0.0308	0.12307	0.03093
0.11477	0.02253	0.11385	0.0308	0.1229	0.03093
0.11481	0.02258	0.11359	0.0308	0.12332	0.03093
0.11536	0.02258	0.11108	0.03085	0.12301	0.03097
0.11565	0.02258	0.11446	0.03085	0.12466	0.03097
0.11331	0.02258	0.11417	0.03085	0.12401	0.03097
0.11947	0.02262	0.11529	0.03085	0.12296	0.03097
0.11733	0.02262	0.11478	0.03085	0.12387	0.03097
0.11595	0.02262	0.11518	0.03089	0.12297	0.03102
0.11714	0.02262	0.11518	0.03089	0.12298	0.03102
0.11658	0.02262	0.11568	0.03089	0.12343	0.03102
0.11641	0.02267	0.11596	0.03089	0.12292	0.03102
0.11681	0.02267	0.12158	0.03094	0.12352	0.03106
0.11544	0.02267	0.1173	0.03094	0.12443	0.03106
0.1159	0.02267	0.1161	0.03094	0.12279	0.03106
0.10959	0.02271	0.11591	0.03094	0.12375	0.03106
0.11528	0.02271	0.11589	0.03094	0.12259	0.03106
0.11509	0.02271	0.11611	0.03098	0.12237	0.03111
0.11539	0.02271	0.11633	0.03098	0.12182	0.03111
0.11678	0.02271	0.11624	0.03098	0.12251	0.03111
0.11635	0.02271	0.1172	0.03098	0.12348	0.03111
0.11594	0.02275	0.11707	0.03098	0.1232	0.03111
0.1156	0.02275	0.10568	0.03103	0.12241	0.03116
0.11742	0.02275	0.11559	0.03103	0.12279	0.03116
0.11737	0.02275	0.1167	0.03103	0.12201	0.03116
0.12629	0.0228	0.1167	0.03103	0.12348	0.03116
0.11747	0.0228	0.11536	0.03103	0.12296	0.03116
0.11798	0.0228	0.11687	0.03107	0.12218	0.0312
0.1171	0.0228	0.11707	0.03107	0.12261	0.0312
0.11695	0.0228	0.11873	0.03107	0.12284	0.0312
0.11811	0.02284	0.11753	0.03107	0.12283	0.0312
0.11727	0.02284	0.11693	0.03107	0.12269	0.03125
0.11742	0.02284	0.12966	0.03112	0.12324	0.03125
0.11865	0.02284	0.11757	0.03112	0.12265	0.03125
0.11805	0.02284	0.1166	0.03112	0.12376	0.03125
0.11649	0.02289	0.11671	0.03112	0.12424	0.03125
0.1172	0.02289	0.11568	0.03112	0.12406	0.03129
0.11706	0.02289	0.11738	0.03116	0.12348	0.03129
0.11604	0.02289	0.11586	0.03116	0.12279	0.03129
0.11719	0.02293	0.1162	0.03116	0.1239	0.03129
0.11791	0.02293	0.11688	0.03116	0.12375	0.03129
0.11772	0.02293	0.11697	0.03116	0.12411	0.03134
0.11819	0.02293	0.10819	0.03121	0.1233	0.03134
0.11844	0.02293	0.1139	0.03121	0.12403	0.03134
0.12652	0.02297	0.11511	0.03121	0.12389	0.03134
0.11784	0.02297	0.1162	0.03121	0.12544	0.03134
0.11833	0.02297	0.11564	0.03121	0.12318	0.03139
0.11797	0.02297	0.11729	0.03121	0.12438	0.03139
0.11905	0.02297	0.11642	0.03125	0.12488	0.03139
0.11812	0.02302	0.11538	0.03125	0.12411	0.03139
0.11802	0.02302	0.11769	0.03125	0.12489	0.03139
0.11821	0.02302	0.11752	0.03125	0.12488	0.03143
0.11892	0.02302	0.11783	0.03125	0.12483	0.03143
0.11846	0.02302	0.1167	0.03125	0.12468	0.03143
0.11809	0.02306	0.12082	0.0313	0.12359	0.03143
0.11718	0.02306	0.11767	0.0313	0.12425	0.03148
0.11766	0.02306	0.11797	0.0313	0.12494	0.03148
0.11761	0.02306	0.11718	0.0313	0.12419	0.03148
0.11741	0.02306	0.11679	0.0313	0.12474	0.03148
0.1187	0.02311	0.11706	0.03134	0.12387	0.03148
0.11821	0.02311	0.1178	0.03134	0.12484	0.03152
0.11779	0.02311	0.11749	0.03134	0.12636	0.03152
0.11809	0.02311	0.11804	0.03134	0.12606	0.03152
0.12679	0.02315	0.11834	0.03134	0.12544	0.03152
0.12042	0.02315	0.11936	0.03134	0.12433	0.03152
0.11861	0.02315	0.10829	0.03139	0.12671	0.03157
0.11934	0.02315	0.11824	0.03139	0.12484	0.03157
0.11856	0.02315	0.11718	0.03139	0.12589	0.03157
0.11915	0.02315	0.11811	0.03139	0.12563	0.03157
0.1172	0.02319	0.11847	0.03139	0.12581	0.03157
0.11732	0.02319	0.11857	0.03143	0.12645	0.03161
0.11749	0.02319	0.11875	0.03143	0.12636	0.03161
0.11883	0.02319	0.11856	0.03143	0.12608	0.03161
0.11855	0.02319	0.11848	0.03143	0.12497	0.03161
0.1122	0.02324	0.11945	0.03143	0.1253	0.03166
0.11681	0.02324	0.11958	0.03148	0.12567	0.03166
0.11687	0.02324	0.12935	0.03148	0.12534	0.03166
0.11706	0.02324	0.12036	0.03148	0.12684	0.03166
0.11606	0.02324	0.12032	0.03148	0.12589	0.03166
0.11674	0.02324	0.12017	0.03148	0.12544	0.03171
0.11645	0.02328	0.12164	0.03148	0.12571	0.03171
0.11763	0.02328	0.1179	0.03152	0.12673	0.03171
0.11807	0.02328	0.11921	0.03152	0.12489	0.03171
0.11682	0.02328	0.11958	0.03152	0.12563	0.03171
0.11691	0.02328	0.11986	0.03152	0.12639	0.03175
0.11819	0.02328	0.12027	0.03152	0.12553	0.03175
0.11827	0.02332	0.11024	0.03157	0.12623	0.03175
0.1193	0.02332	0.11847	0.03157	0.12617	0.03175
0.12047	0.02332	0.1193	0.03157	0.12595	0.03175
0.11982	0.02332	0.12009	0.03157	0.1269	0.0318
0.11856	0.02332	0.12071	0.03157	0.12659	0.0318
0.11907	0.02337	0.12089	0.03157	0.12687	0.0318
0.11953	0.02337	0.12099	0.03161	0.12655	0.0318
0.11874	0.02337	0.12229	0.03161	0.12655	0.03184
0.11989	0.02337	0.12032	0.03161	0.12707	0.03184
0.1198	0.02337	0.12106	0.03161	0.12791	0.03184
0.11912	0.02337	0.12149	0.03161	0.12548	0.03184
0.11892	0.02341	0.12219	0.03166	0.12636	0.03184
0.11876	0.02341	0.12152	0.03166	0.1278	0.03184
0.1197	0.02341	0.12101	0.03166	0.12767	0.03189
0.12008	0.02341	0.12009	0.03166	0.12727	0.03189
0.12003	0.02341	0.12182	0.03166	0.12759	0.03189
0.11998	0.02346	0.12124	0.0317	0.12759	0.03189
0.12075	0.02346	0.12143	0.0317	0.12997	0.03194
0.12042	0.02346	0.12108	0.0317	0.12931	0.03194
0.12038	0.02346	0.12136	0.0317	0.12815	0.03194
0.12175	0.02346	0.12064	0.0317	0.12893	0.03194
0.13091	0.0235	0.11569	0.03175	0.13118	0.03198
0.12126	0.0235	0.1215	0.03175	0.13015	0.03198
0.12125	0.0235	0.12055	0.03175	0.13045	0.03198
0.12095	0.0235	0.12126	0.03175	0.13218	0.03198
0.12035	0.0235	0.12233	0.03175	0.1328	0.03203
0.12148	0.02354	0.12191	0.03179	0.13208	0.03203
0.12175	0.02354	0.12122	0.03179	0.1328	0.03203
0.12198	0.02354	0.12169	0.03179	0.13392	0.03207
0.12162	0.02354	0.12113	0.03179	0.13317	0.03207
0.12231	0.02354	0.11976	0.03179	0.13287	0.03207
0.11628	0.02359	0.1279	0.03184	0.1332	0.03212
0.11491	0.02359	0.12155	0.03184	0.13392	0.03212
0.12074	0.02359	0.12219	0.03184	0.13418	0.03212
0.11996	0.02359	0.12009	0.03184	0.13501	0.03217
0.1213	0.02359	0.12127	0.03184	0.13359	0.03217
0.12143	0.02359	0.12219	0.03188	0.13512	0.03221
0.12121	0.02363	0.12182	0.03188	0.13371	0.03221
0.12246	0.02363	0.12256	0.03188	0.13548	0.03226
0.12212	0.02363	0.12183	0.03188	0.13456	0.03226
0.12222	0.02363	0.12219	0.03188	0.13559	0.0323
0.12098	0.02363	0.12324	0.03188	0.13531	0.0323
0.12808	0.02368	0.12096	0.03193	0.13522	0.03235
0.12223	0.02368	0.12183	0.03193	0.13622	0.03235
0.12364	0.02368	0.12145	0.03193	0.13629	0.03239
0.12199	0.02368	0.12223	0.03193	0.13786	0.03239
0.12052	0.02368	0.122	0.03193	0.13724	0.03244
0.12031	0.02368	0.12325	0.03197	0.13915	0.03244
0.12166	0.02372	0.12223	0.03197	0.13977	0.03249
0.12149	0.02372	0.12316	0.03197	0.14033	0.03249
0.12167	0.02372	0.12315	0.03197	0.14066	0.03253
0.1208	0.02372	0.12284	0.03197	0.14234	0.03253
0.12089	0.02372	0.13206	0.03202	0.14282	0.03258
0.11184	0.02376	0.12439	0.03202	0.14255	0.03258
0.12052	0.02376	0.12357	0.03202	0.14243	0.03262
0.1198	0.02376	0.12512	0.03202	0.14381	0.03267
0.12098	0.02376	0.12476	0.03202	0.14464	0.03267
0.1212	0.02376	0.12411	0.03206	0.14475	0.03272
0.11979	0.02381	0.12417	0.03206	0.14529	0.03276
0.12112	0.02381	0.12348	0.03206	0.14656	0.03276
0.12254	0.02381	0.12434	0.03206	0.14648	0.03281
0.12172	0.02381	0.12497	0.03206	0.1481	0.03285
0.12186	0.02381	0.12475	0.03206	0.14927	0.03285
0.12858	0.02385	0.12327	0.03211	0.14922	0.0329
0.12237	0.02385	0.12359	0.03211	0.14888	0.03294
0.12298	0.02385	0.12452	0.03211	0.15085	0.03294
0.12282	0.02385	0.12502	0.03211	0.14884	0.03299
0.12237	0.02385	0.12315	0.03211	0.14966	0.03304
0.1231	0.02389	0.12522	0.03215	0.1514	0.03308
0.12422	0.02389	0.12489	0.03215	0.15104	0.03308
0.1231	0.02389	0.12494	0.03215	0.15185	0.03313
0.12353	0.02389	0.12507	0.03215	0.15378	0.03317
0.12336	0.02389	0.12488	0.03215	0.15149	0.03317
0.12451	0.02389	0.13518	0.0322	0.1528	0.03322
0.12007	0.02394	0.1269	0.0322	0.1514	0.03327
0.1241	0.02394	0.12662	0.0322	0.15084	0.03331
0.12358	0.02394	0.12682	0.0322	0.15183	0.03336
0.12372	0.02394	0.12552	0.0322	0.15254	0.0334
0.12408	0.02394	0.12662	0.03224	0.15269	0.0334
0.12437	0.02398	0.12675	0.03224	0.15239	0.0335
0.12518	0.02398	0.12634	0.03224	0.15363	0.0335
0.12422	0.02398	0.12777	0.03224	0.15381	0.03354
0.12487	0.02398	0.12713	0.03224	0.15468	0.03359
0.12625	0.02398	0.12068	0.03229	0.15424	0.03363
0.12606	0.02403	0.1258	0.03229	0.15708	0.03368
0.12642	0.02403	0.1265	0.03229	0.15725	0.03372
0.12661	0.02403	0.12613	0.03229	0.15803	0.03377
0.12685	0.02403	0.12704	0.03229	0.15708	0.03382
0.12707	0.02407	0.12704	0.03229	0.15605	0.03386
0.12701	0.02407	0.12753	0.03233	0.1572	0.03391
0.12708	0.02407	0.12687	0.03233	0.15814	0.03395
0.12624	0.02407	0.1278	0.03233	0.15966	0.03405
0.12791	0.02407	0.12782	0.03233	0.15882	0.03405
0.12134	0.02411	0.12916	0.03233	0.15995	0.03409
0.12778	0.02411	0.12899	0.03238	0.16034	0.03418
0.12702	0.02411	0.12806	0.03238	0.16046	0.03418
0.12772	0.02411	0.12938	0.03238	0.16096	0.03428
0.12825	0.02411	0.13027	0.03238	0.16257	0.03432
0.12735	0.02411	0.12887	0.03242	0.16175	0.03437
0.12791	0.02416	0.12975	0.03242	0.16131	0.03441
0.12674	0.02416	0.13042	0.03242	0.16292	0.03446
0.12864	0.02416	0.13064	0.03242	0.1621	0.0345
0.12827	0.02416	0.12287	0.03247	0.16138	0.0346
0.14016	0.0242	0.12901	0.03247	0.16229	0.0346
0.12931	0.0242	0.12961	0.03247	0.16306	0.03469
0.12932	0.0242	0.13	0.03247	0.16168	0.03483
0.12977	0.0242	0.12907	0.03247	0.16246	0.03505
0.12964	0.0242	0.12987	0.03251	0.16329	0.03505
0.12991	0.02425	0.12898	0.03251	0.16186	0.03515
0.1301	0.02425	0.13014	0.03251	0.16293	0.03519
0.13109	0.02425	0.13045	0.03251	0.16383	0.03528
0.13139	0.02425	0.1312	0.03256	0.16376	0.03533
0.12928	0.02429	0.13153	0.03256	0.16485	0.03538
0.12963	0.02429	0.13209	0.03256	0.16493	0.03547
0.12984	0.02429	0.1311	0.03256	0.16566	0.03551
0.12894	0.02429	0.1318	0.0326	0.16586	0.03574
0.13047	0.02433	0.13247	0.0326	0.16758	0.03593
0.12872	0.02433	0.13166	0.0326	0.16841	0.03602
0.13032	0.02433	0.12206	0.03265	0.16815	0.03606
0.12976	0.02433	0.1321	0.03265	0.16479	0.0362
0.14099	0.02438	0.13218	0.03265	0.16413	0.03625
0.13011	0.02438	0.13366	0.03265	0.16678	0.03629
0.13105	0.02438	0.13411	0.03269	0.16839	0.03643
0.13192	0.02438	0.13448	0.03269	0.16899	0.03648
0.13338	0.02442	0.1351	0.03269	0.17254	0.03657
0.13141	0.02442	0.14243	0.03274	0.17185	0.03661
0.13151	0.02442	0.13326	0.03274	0.17252	0.03666
0.12223	0.02446	0.13399	0.03274	0.17549	0.0368
0.13113	0.02446	0.13557	0.03274	0.1773	0.03684
0.1297	0.02446	0.13576	0.03278	0.17864	0.03698
0.12935	0.02446	0.13527	0.03278	0.18017	0.03703
0.12981	0.02451	0.13582	0.03278	0.18103	0.03707
0.1302	0.02451	0.13652	0.03283	0.1775	0.03716
0.13021	0.02451	0.13683	0.03283	0.18073	0.03726
0.13862	0.02455	0.13648	0.03283	0.18237	0.0373
0.13288	0.02455	0.13647	0.03287	0.18366	0.03744
0.13239	0.02455	0.13698	0.03287	0.18489	0.03749
0.13247	0.0246	0.13852	0.03287	0.18648	0.03758
0.13288	0.0246	0.13706	0.03292	0.18645	0.03767
0.13252	0.0246	0.13814	0.03292	0.18553	0.03772
0.1278	0.02464	0.13776	0.03296	0.18631	0.03781
0.13221	0.02464	0.13999	0.03296	0.18657	0.0379
0.13193	0.02468	0.13908	0.03296	0.18837	0.03799
0.13275	0.02468	0.13201	0.03301	0.18981	0.03804
0.13175	0.02468	0.1394	0.03301	0.19042	0.03813
0.13175	0.02468	0.13804	0.03301	0.1932	0.03827
0.13295	0.02473	0.14005	0.03305	0.19646	0.0384
0.13316	0.02473	0.13954	0.03305	0.20149	0.03863
0.13263	0.02477	0.14897	0.0331	0.20339	0.03882
0.13257	0.02477	0.14208	0.0331	0.20302	0.03886
0.13294	0.02477	0.14246	0.0331	0.204	0.03895
0.13093	0.02482	0.14252	0.03314	0.20245	0.03909
0.13266	0.02482	0.14284	0.03314	0.20171	0.03914
0.13331	0.02486	0.14215	0.03319	0.2026	0.03927
0.13388	0.02486	0.14107	0.03323	0.20487	0.03932
0.13458	0.02486	0.14237	0.03323	0.20623	0.03946
0.14176	0.0249	0.15296	0.03328	0.20731	0.0395
0.13449	0.0249	0.14409	0.03328	0.20583	0.0396
0.13414	0.02495	0.14381	0.03332	0.20893	0.03969
0.13419	0.02495	0.14423	0.03332	0.20899	0.03978
0.13467	0.02495	0.13701	0.03337	0.21055	0.03983
0.13321	0.02499	0.14512	0.03337	0.20972	0.0401
0.13433	0.02499	0.14516	0.03341	0.21118	0.04038
0.13599	0.02504	0.14675	0.03341	0.21335	0.04051
0.13498	0.02504	0.14754	0.03346	0.21172	0.04065
0.14207	0.02508	0.14813	0.0335	0.21265	0.0407
0.13579	0.02508	0.14829	0.0335	0.21492	0.04079
0.1362	0.02508	0.14073	0.03355	0.21508	0.04093
0.13682	0.02512	0.14866	0.03355	0.21595	0.04097
0.13641	0.02512	0.14989	0.03359	0.21831	0.04116
0.13621	0.02517	0.15568	0.03364	0.21755	0.0412
0.1374	0.02517	0.15187	0.03368	0.2205	0.04134
0.13844	0.02521	0.1526	0.03368	0.21763	0.04143
0.13783	0.02521	0.14265	0.03373	0.21596	0.04148
0.14034	0.02525	0.1522	0.03373	0.21545	0.04161
0.13863	0.02525	0.15325	0.03377	0.21546	0.04171
0.13988	0.0253	0.16538	0.03382	0.21493	0.0418
0.139	0.0253	0.1555	0.03386	0.21499	0.04194
0.1323	0.02534	0.15525	0.03386	0.21596	0.04203
0.14017	0.02534	0.15582	0.03391	0.21665	0.04217
0.14151	0.02539	0.15669	0.03395	0.21819	0.04226
0.15344	0.02543	0.16668	0.034	0.22074	0.04235
0.14208	0.02543	0.15815	0.034	0.22471	0.04249
0.14147	0.02547	0.15827	0.03404	0.22738	0.04258
0.1423	0.02547	0.15019	0.03409	0.22901	0.04276
0.14051	0.02552	0.15983	0.03409	0.2287	0.04281
0.14328	0.02552	0.15883	0.03413	0.22806	0.0429
0.14356	0.02556	0.16633	0.03418	0.22818	0.04304
0.15257	0.02561	0.16118	0.03422	0.23075	0.04313
0.14258	0.02565	0.15325	0.03427	0.2331	0.04327
0.14389	0.02565	0.16019	0.03431	0.23654	0.04336
0.13193	0.02569	0.1608	0.03431	0.23676	0.04345
0.14343	0.02569	0.16264	0.0344	0.23818	0.04363
0.14399	0.02574	0.16217	0.0344	0.24098	0.04368
0.14507	0.02578	0.16257	0.03445	0.24301	0.04377
0.14483	0.02582	0.16297	0.03449	0.24512	0.04395
0.13691	0.02587	0.17206	0.03454	0.24549	0.04405
0.14346	0.02587	0.16391	0.03458	0.24252	0.04418
0.14502	0.02591	0.16652	0.03458	0.24255	0.04428
0.15401	0.02596	0.16601	0.03467	0.24064	0.04432
0.14608	0.026	0.16715	0.03467	0.24116	0.0445
0.14675	0.026	0.1698	0.03476	0.24241	0.04455
0.14684	0.02609	0.17	0.03476	0.24799	0.04473
0.14679	0.02609	0.16949	0.03485	0.25051	0.04483
0.14961	0.02613	0.16989	0.03485	0.25178	0.04492
0.14866	0.02618	0.17257	0.03494	0.25345	0.04506
0.14246	0.02622	0.17343	0.03494	0.25619	0.04515
0.14934	0.02626	0.17265	0.03503	0.25625	0.04533
0.1502	0.02626	0.1726	0.03503	0.25599	0.04542
0.15216	0.02635	0.18318	0.03508	0.25554	0.04551
0.15178	0.02635	0.16834	0.03517	0.25106	0.04565
0.15066	0.02639	0.16794	0.03517	0.25122	0.04574
0.15041	0.02644	0.18746	0.03526	0.25738	0.04593
0.15469	0.02648	0.17822	0.03526	0.2582	0.04597
0.1542	0.02653	0.16175	0.03535	0.25731	0.04606
0.1527	0.02657	0.17243	0.03535	0.2506	0.04625
0.15266	0.02661	0.18809	0.03544	0.2495	0.04634
0.15425	0.02666	0.17894	0.03548	0.25326	0.04652
0.15362	0.0267	0.17786	0.03553	0.25543	0.04661
0.14649	0.02675	0.17797	0.03557	0.2521	0.04671
0.15378	0.02679	0.18818	0.03562	0.25359	0.04689
0.16294	0.02683	0.17227	0.03571	0.25341	0.04698
0.15273	0.02692	0.17273	0.03571	0.25744	0.04716
0.14835	0.02692	0.19182	0.0358	0.25818	0.04726
0.1636	0.02701	0.18034	0.03584	0.25901	0.04735
0.15764	0.02701	0.17176	0.03589	0.26064	0.04753
0.15085	0.0271	0.17985	0.03593	0.26117	0.04762
0.15764	0.02714	0.18215	0.03602	0.26246	0.04781
0.16254	0.02718	0.17276	0.03607	0.26146	0.0479
0.15956	0.02723	0.17959	0.03611	0.25936	0.04799
0.15828	0.02727	0.18831	0.03616	0.25868	0.04822
0.15837	0.02732	0.17878	0.0362	0.26143	0.04827
0.16212	0.0274	0.17782	0.03629	0.26418	0.0485
0.15344	0.02745	0.18617	0.03634	0.26247	0.04859
0.16072	0.02749	0.16767	0.03643	0.26138	0.04872
0.16926	0.02754	0.17366	0.03647	0.26299	0.04886
0.16334	0.02758	0.1774	0.03656	0.2646	0.049
0.16177	0.02767	0.17099	0.03661	0.26711	0.04909
0.17153	0.02771	0.1911	0.0367	0.26652	0.04927
0.15823	0.0278	0.18261	0.03674	0.26762	0.04937
0.16087	0.0278	0.18031	0.03683	0.27108	0.0496
0.172	0.02789	0.18929	0.03688	0.26724	0.04973
0.16346	0.02793	0.18544	0.03692	0.2722	0.04992
0.163	0.02802	0.18214	0.03701	0.27194	0.05001
0.17134	0.02806	0.19442	0.03706	0.27534	0.0501
0.15368	0.02815	0.18004	0.03715	0.27703	0.05028
0.16182	0.02819	0.1867	0.03719	0.27775	0.05042
0.17349	0.02824	0.19029	0.03728	0.27972	0.05051
0.16403	0.02828	0.1802	0.03733	0.27717	0.05074
0.16295	0.02832	0.19679	0.03742	0.27972	0.05083
0.16807	0.02846	0.19076	0.03746	0.28603	0.05102
0.16728	0.02846	0.18913	0.03755	0.28564	0.05116
0.17347	0.02859	0.19918	0.0376	0.28587	0.05125
0.16972	0.02863	0.18068	0.03769	0.28688	0.05143
0.1663	0.02868	0.19368	0.03773	0.28659	0.05152
0.17471	0.02876	0.1891	0.03787	0.28567	0.05175
0.16632	0.02885	0.18865	0.03787	0.28511	0.05184
0.17271	0.02889	0.19614	0.038	0.28553	0.05194
0.17622	0.02898	0.18808	0.03805	0.28561	0.05216
0.1689	0.02903	0.20654	0.03814	0.2862	0.05226
0.17469	0.02907	0.19908	0.03818	0.2886	0.05249
0.17712	0.02916	0.18932	0.03823	0.28855	0.05262
0.16989	0.0292	0.2122	0.03832	0.29425	0.05281
0.1903	0.02929	0.19899	0.03841	0.29191	0.05294
0.17928	0.02933	0.21032	0.0385	0.29085	0.05304
0.17833	0.02942	0.2039	0.03854	0.2949	0.05322
0.18692	0.02946	0.20348	0.03863	0.29464	0.05336
0.17673	0.0296	0.20967	0.03872	0.29497	0.05349
0.17934	0.0296	0.20482	0.03881	0.29958	0.05372
0.17036	0.02973	0.21125	0.03886	0.30127	0.05377
0.17999	0.02977	0.19259	0.03895	0.30183	0.05405
0.18114	0.02986	0.2091	0.03904	0.30432	0.05414
0.17176	0.0299	0.19482	0.03913	0.30417	0.05427
0.18717	0.02999	0.20583	0.03917	0.30532	0.05446
0.17311	0.03008	0.21575	0.03926	0.30629	0.05455
0.18267	0.03012	0.20624	0.03935	0.30754	0.05483
0.18552	0.03021	0.21703	0.0394	0.30897	0.05487
0.17865	0.0303	0.20675	0.03953	0.31257	0.05501
0.19021	0.03039	0.22377	0.03958	0.31568	0.05524
0.17944	0.03043	0.20531	0.03967	0.31631	0.05538
0.19679	0.03052	0.22349	0.03976	0.32069	0.05556
0.1881	0.03056	0.20656	0.03985	0.32185	0.0557
0.19588	0.03069	0.22498	0.03994	0.32087	0.05579
0.18855	0.03074	0.21362	0.04003	0.3198	0.05597
0.18951	0.03082	0.2215	0.04007	0.31778	0.05611
0.19185	0.03091	0.22964	0.04016	0.31512	0.05634
0.19067	0.031	0.21925	0.04025	0.31322	0.05643
0.19919	0.03104	0.23357	0.0403	0.31559	0.05657
0.19048	0.03118	0.22117	0.04043	0.31206	0.0568
0.20003	0.03122	0.23211	0.04048	0.31391	0.05694
0.18419	0.03135	0.21927	0.04057	0.31622	0.05717
0.20362	0.03139	0.23558	0.04066	0.31664	0.0573
0.19399	0.03144	0.22141	0.04079	0.31785	0.05739
0.20083	0.03157	0.23362	0.04084	0.32152	0.05762
0.19506	0.03161	0.21833	0.04093	0.32234	0.05776
0.20471	0.03175	0.2371	0.04102	0.32512	0.05799
0.19613	0.03179	0.22124	0.04111	0.3261	0.05808
0.20288	0.03192	0.23932	0.0412	0.32711	0.05822
0.19633	0.03196	0.23047	0.04124	0.32888	0.05849
0.20668	0.0321	0.24255	0.04138	0.33203	0.05863
0.19689	0.03214	0.23315	0.04142	0.33462	0.05882
0.20683	0.03227	0.24029	0.04156	0.33539	0.05895
0.19277	0.03236	0.22841	0.04165	0.33436	0.05909
0.20721	0.03245	0.24175	0.04174	0.33729	0.05928
0.19178	0.03254	0.23513	0.04178	0.33836	0.05941
0.19892	0.03258	0.24474	0.04192	0.34129	0.05955
0.19221	0.03271	0.23541	0.04196	0.34227	0.05983
0.20154	0.03275	0.24558	0.0421	0.34297	0.05992
0.19543	0.03289	0.22892	0.04219	0.34744	0.06015
0.20355	0.03293	0.24693	0.04232	0.34916	0.06028
0.1946	0.03306	0.23357	0.04237	0.35084	0.06051
0.21407	0.03315	0.2445	0.04246	0.35241	0.06061
0.19753	0.03328	0.23141	0.04255	0.35233	0.06074
0.21406	0.03332	0.24987	0.04264	0.35363	0.06102
0.21296	0.0335	0.2346	0.04277	0.35372	0.06111
0.21099	0.03354	0.25153	0.04282	0.35636	0.06125
0.2145	0.03367	0.23936	0.04295	0.35976	0.06148
0.20875	0.03372	0.25336	0.043	0.36055	0.06157
0.21678	0.03385	0.24293	0.04313	0.36589	0.06184
0.20092	0.03394	0.25217	0.04322	0.36772	0.06194
0.20802	0.03398	0.25541	0.04336	0.36969	0.06217
0.20069	0.03416	0.23963	0.04345	0.36741	0.0623
0.21771	0.0342	0.25569	0.04358	0.36824	0.06244
0.20824	0.03433	0.23981	0.04363	0.36694	0.06262
0.22181	0.03442	0.25354	0.04372	0.36629	0.06276
0.21539	0.03455	0.23801	0.04381	0.36488	0.0629
0.21427	0.0346	0.25924	0.0439	0.36496	0.06317
0.22568	0.03477	0.25614	0.04408	0.35871	0.06327
0.20867	0.03482	0.25543	0.04412	0.36103	0.0635
0.21776	0.03495	0.26809	0.04426	0.36446	0.06363
0.20932	0.03504	0.24075	0.04434	0.37367	0.06386
0.21108	0.03517	0.25769	0.04448	0.37613	0.064
0.22252	0.03525	0.25005	0.04457	0.37837	0.06414
0.21285	0.03539	0.26675	0.04462	0.37958	0.06441
0.232	0.03547	0.2665	0.0448	0.37831	0.0645
0.23118	0.03561	0.26545	0.04484	0.38355	0.06464
0.22366	0.03565	0.26813	0.04502	0.38506	0.06492
0.22087	0.03574	0.25489	0.04507	0.38568	0.06506
0.21682	0.03591	0.26522	0.0452	0.38648	0.06528
0.23559	0.03596	0.25498	0.04529	0.38819	0.06542
0.23355	0.03613	0.24648	0.04543	0.38939	0.06556
0.23018	0.03617	0.26006	0.04551	0.39096	0.06574
0.23666	0.03635	0.25013	0.04565	0.39282	0.06588
0.22106	0.03639	0.25906	0.04574	0.39409	0.06616
0.22316	0.03657	0.26634	0.04587	0.394	0.06629
0.23509	0.03666	0.24896	0.04596	0.39326	0.06639
0.22149	0.03679	0.25418	0.04614	0.39634	0.06666
0.2429	0.03683	0.26075	0.04619	0.39755	0.0668
0.24244	0.03701	0.25888	0.04637	0.39704	0.06703
0.23642	0.03705	0.27462	0.04646	0.3961	0.06717
0.24414	0.03723	0.25711	0.0465	0.3929	0.0673
0.22926	0.03732	0.26134	0.04673	0.39243	0.06753
0.22922	0.03745	0.27871	0.04682	0.39234	0.06767
0.24402	0.03753	0.27712	0.04695	0.39346	0.06794
0.22954	0.03762	0.26771	0.04704	0.39029	0.06808
0.24264	0.03775	0.272	0.04722	0.38832	0.06817
0.23588	0.03784	0.28399	0.04731	0.39436	0.0685
0.23285	0.03802	0.27475	0.04745	0.39702	0.06863
0.25359	0.03811	0.29251	0.04754	0.40196	0.06886
0.2349	0.03819	0.27437	0.04763	0.40317	0.069
0.23519	0.03837	0.27674	0.04776	0.40507	0.06918
0.25396	0.03841	0.29162	0.04785	0.41082	0.06941
0.2587	0.03859	0.27797	0.04794	0.41057	0.06955
0.24333	0.03868	0.27945	0.04812	0.41424	0.06983
0.24609	0.03885	0.28508	0.04817	0.41619	0.06992
0.25798	0.03894	0.28875	0.04839	0.41697	0.07006
0.24871	0.03903	0.27831	0.04848	0.42431	0.07038
0.24715	0.0392	0.29399	0.04862	0.42665	0.07051
0.24628	0.03925	0.27555	0.04871	0.4262	0.07074
0.26313	0.03933	0.29144	0.0488	0.42907	0.07088
0.26257	0.03951	0.2825	0.04902	0.43048	0.07111
0.24962	0.0396	0.27789	0.04907	0.43064	0.07125
0.25047	0.03977	0.2973	0.04916	0.42883	0.07139
0.26994	0.03986	0.28535	0.04938	0.43526	0.07166
0.25476	0.03995	0.29275	0.04947	0.43587	0.07175
0.25259	0.04008	0.28075	0.04961	0.43763	0.07189
0.27305	0.04017	0.28848	0.04974	0.43783	0.07217
0.27466	0.04034	0.29629	0.04983	0.43685	0.07226
0.25166	0.04043	0.3015	0.05001	0.43739	0.07253
0.27249	0.04052	0.28499	0.0501	0.43961	0.07272
0.27177	0.04074	0.28982	0.05028	0.44017	0.07294
0.26248	0.04078	0.30689	0.05037	0.43943	0.07308
0.25781	0.04096	0.28882	0.05051	0.43875	0.07322
0.27721	0.04109	0.29197	0.05064	0.44059	0.07345
0.27591	0.04122	0.30973	0.05078	0.44414	0.07359
0.2634	0.04131	0.29799	0.05087	0.44499	0.07391
0.26393	0.04135	0.30036	0.05105	0.44546	0.07405
0.26659	0.04148	0.31619	0.05114	0.44768	0.07414
0.28363	0.04161	0.32154	0.05132	0.44298	0.07441
0.2697	0.0417	0.30745	0.05141	0.44786	0.07455
0.27021	0.04183	0.30754	0.05154	0.45282	0.07483
0.2897	0.04192	0.31926	0.05168	0.45434	0.07496
0.29136	0.04214	0.3206	0.05181	0.45411	0.0751
0.27005	0.04223	0.32424	0.05199	0.45693	0.07533
0.27212	0.04236	0.31445	0.05208	0.45899	0.07547
0.29111	0.04249	0.32438	0.05217	0.45932	0.07579
0.27609	0.04258	0.33027	0.05235	0.46192	0.07588
0.27517	0.04271	0.31234	0.05249	0.46278	0.07602
0.2965	0.04284	0.31417	0.05262	0.46544	0.07629
0.27567	0.04293	0.33362	0.05276	0.46655	0.07643
0.28434	0.04311	0.30669	0.05285	0.46852	0.07671
0.29753	0.04319	0.31288	0.05303	0.46838	0.07684
0.29588	0.04337	0.32713	0.05312	0.46764	0.07698
0.2979	0.0435	0.33324	0.0533	0.47089	0.07721
0.28272	0.04359	0.31326	0.05339	0.47293	0.07739
0.28583	0.04376	0.32175	0.05352	0.47954	0.07767
0.30334	0.04385	0.32167	0.0537	0.48108	0.07781
0.302	0.04407	0.3399	0.05379	0.482	0.07794
0.28984	0.04411	0.34243	0.05402	0.48625	0.07822
0.30472	0.0442	0.32543	0.05411	0.48619	0.07831
0.30803	0.04442	0.32468	0.05429	0.48851	0.07859
0.2857	0.04451	0.34487	0.05438	0.49288	0.07877
0.28745	0.04468	0.33489	0.05451	0.51395	0.079
0.30309	0.04482	0.33501	0.05469	0.52964	0.07914
0.30816	0.04495	0.33255	0.05478	0.54494	0.07927
0.30975	0.04508	0.33487	0.05496	0.56203	0.07946
0.2946	0.04517	0.35013	0.05505	0.56659	0.07955
0.30274	0.04539	0.33581	0.05514	0.57254	0.07969
0.31849	0.04543	0.33433	0.05537	0.58122	0.07987
0.30618	0.04556	0.35332	0.05546	0.58172	0.07996
0.30467	0.04574	0.34797	0.05568	0.58311	0.08015
0.32212	0.04582	0.34963	0.05577	0.58213	0.08024
0.32499	0.046	0.34634	0.05586	0.58629	0.08042
0.32115	0.04613	0.33755	0.05604	0.58829	0.08051
0.32189	0.04631	0.35446	0.05618	0.59075	0.08061
0.30913	0.04639	0.35603	0.05636	0.59357	0.08079
0.32726	0.04648	0.33992	0.05645	0.59056	0.08088
0.32647	0.0467	0.34205	0.05658	0.59214	0.08097
0.31469	0.04675	0.34572	0.05676	0.58994	0.08116
0.32819	0.04688	0.36182	0.0569	0.5879	0.08125
0.31262	0.0471	0.35999	0.05708	0.58713	0.08148
0.32724	0.04718	0.34194	0.05717	0.58676	0.08157
0.33037	0.04736	0.35307	0.0573	0.58296	0.08175
0.31168	0.04749	0.34753	0.05753	0.58006	0.08184
0.32627	0.04758	0.36404	0.05757	0.5771	0.08198
0.328	0.04775	0.36683	0.0578	0.57576	0.08216
0.3225	0.04789	0.36352	0.05793	0.57555	0.08226
0.33177	0.0481	0.37	0.05811	0.57013	0.08239
0.31324	0.04819	0.35292	0.05825	0.56992	0.08258
0.33265	0.04828	0.36896	0.05834	0.56375	0.08272
0.3199	0.0485	0.36242	0.05856	0.5475	0.08294
0.33667	0.04859	0.36944	0.05865	0.53944	0.08304
0.3381	0.04881	0.37257	0.05888	0.53023	0.08331
0.32552	0.04889	0.35464	0.05896	0.53051	0.08345
0.33226	0.04903	0.36562	0.0591	0.5321	0.08354
0.32978	0.0492	0.3567	0.05932	0.5254	0.08386
0.34655	0.04929	0.37553	0.05942	0.52446	0.084
0.34635	0.04951	0.36417	0.05964	0.52562	0.08423
0.33041	0.0496	0.38071	0.05977	0.53003	0.08441
0.33946	0.04973	0.36108	0.05986	0.53954	0.08464
0.33318	0.04995	0.36685	0.06009	0.54661	0.08483
0.3472	0.04999	0.36262	0.06018	0.54929	0.08496
0.3497	0.05025	0.36222	0.0604	0.55855	0.08519
0.35057	0.05034	0.37831	0.06054	0.56413	0.08533
0.35267	0.05052	0.3802	0.06063	0.56978	0.08561
0.33917	0.05065	0.37739	0.0609	0.57228	0.0857
0.35741	0.05078	0.37126	0.06099	0.57187	0.08583
0.34804	0.05096	0.38654	0.06121	0.57554	0.08611
0.36226	0.05104	0.37958	0.06135	0.57215	0.08625
0.34594	0.05117	0.38722	0.06153	0.56932	0.08648
0.3623	0.05139	0.37034	0.06166	0.57572	0.08661
0.35214	0.05148	0.37754	0.0618	0.58498	0.08684
0.34824	0.0517	0.37597	0.06202	0.58874	0.08698
0.35705	0.05183	0.39652	0.06211	0.59124	0.08712
0.35014	0.05201	0.39704	0.06225	0.59508	0.08739
0.36378	0.05214	0.39918	0.06247	0.59441	0.08749
0.34907	0.05223	0.37946	0.06256	0.59401	0.08762
0.35992	0.05245	0.39957	0.06283	0.59094	0.0879
0.35761	0.05254	0.39471	0.06297	0.59191	0.08799
0.37336	0.05267	0.40697	0.06315	0.59182	0.08827
0.37623	0.05284	0.38935	0.06328	0.59571	0.0884
0.37223	0.05297	0.39717	0.06342	0.60037	0.08863
0.37865	0.05319	0.39279	0.06364	0.60359	0.08877
0.36152	0.05328	0.41454	0.06373	0.60073	0.08891
0.37951	0.05354	0.41084	0.06387	0.61008	0.08909
0.3615	0.05363	0.41777	0.06409	0.61665	0.08923
0.36785	0.05376	0.40042	0.06418	0.6179	0.08937
0.37129	0.05394	0.42158	0.06445	0.61496	0.08964
0.38356	0.05407	0.41066	0.06459	0.61494	0.08973
0.38528	0.05425	0.42543	0.06477	0.60778	0.09001
0.38694	0.05438	0.40643	0.0649	0.60181	0.09015
0.37208	0.05451	0.42187	0.06504	0.59768	0.09038
0.39176	0.05473	0.41326	0.06522	0.59353	0.09051
0.37576	0.05482	0.42791	0.06535	0.59262	0.09065
0.37449	0.05503	0.42538	0.06549	0.58668	0.09088
0.37567	0.05517	0.43126	0.06571	0.58287	0.09106
0.3949	0.0553	0.41824	0.0658	0.57129	0.09138
0.39829	0.05547	0.4365	0.06607	0.56642	0.09148
0.39492	0.0556	0.42683	0.06621	0.5648	0.09166
0.38084	0.05574	0.41878	0.0663	0.56941	0.09198
0.38602	0.05596	0.42325	0.06652	0.56624	0.09212
0.38137	0.05604	0.42827	0.06666	0.57075	0.09244
0.39829	0.05631	0.42214	0.06684	0.57332	0.09262
0.40084	0.05639	0.44363	0.06697	0.57394	0.09276
0.38924	0.05661	0.43797	0.06711	0.57759	0.09313
0.39451	0.05675	0.44068	0.06738	0.58094	0.09331
0.40169	0.05683	0.42896	0.06742	0.58596	0.09359
0.40717	0.05705	0.44846	0.06769	0.58861	0.09377
0.40795	0.05718	0.44964	0.06783	0.59389	0.09405
0.41247	0.0574	0.45264	0.06805	0.59982	0.09423
0.40364	0.05754	0.44339	0.06819	0.60445	0.09437
0.39623	0.05767	0.44401	0.06828	0.60228	0.09469
0.39942	0.05784	0.44452	0.0685	0.598	0.09483
0.40082	0.05797	0.45859	0.06864	0.60279	0.09515
0.40773	0.05824	0.47087	0.06873	0.6022	0.09528
0.40138	0.05832	0.47145	0.06895	0.60292	0.09547
0.4196	0.05841	0.45915	0.06909	0.60158	0.09579
0.41199	0.05867	0.48024	0.06931	0.60405	0.09597
0.42365	0.05881	0.47469	0.06945	0.6108	0.09625
0.42592	0.05898	0.48042	0.06963	0.61383	0.09643
0.42223	0.05911	0.46541	0.06976	0.61852	0.09671
0.40942	0.05925	0.47368	0.0699	0.61799	0.09689
0.41626	0.05946	0.46903	0.07008	0.61841	0.09703
0.41412	0.0596	0.48968	0.07021	0.6221	0.09739
0.43071	0.05982	0.47273	0.07035	0.62338	0.09749
0.41716	0.0599	0.48601	0.07053	0.62583	0.09767
0.43198	0.06017	0.47273	0.07066	0.63004	0.09799
0.41645	0.0603	0.48684	0.07089	0.63141	0.09808
0.43406	0.06039	0.4745	0.07098	0.63996	0.09845
0.4238	0.06065	0.4746	0.0712	0.64395	0.09859
0.43994	0.06074	0.47592	0.07134	0.64957	0.09886
0.423	0.06096	0.4948	0.07147	0.65392	0.099
0.43978	0.06109	0.49265	0.0717	0.65332	0.09918
0.43794	0.06122	0.49534	0.07179	0.65461	0.09941
0.44125	0.06144	0.50227	0.07201	0.65583	0.0996
0.43634	0.06157	0.48865	0.07215	0.65825	0.09987
0.43947	0.06183	0.48758	0.07224	0.66353	0.10006
0.43409	0.06192	0.48871	0.07246	0.66724	0.10015
0.43164	0.06205	0.5067	0.0726	0.67341	0.10047
0.44636	0.06232	0.49366	0.07282	0.66925	0.10061
0.4374	0.06245	0.50661	0.07296	0.66989	0.10083
0.45033	0.06267	0.49748	0.073	0.66757	0.10102
0.44086	0.0628	0.51318	0.07327	0.6642	0.10116
0.45601	0.06302	0.5014	0.0734	0.6613	0.10143
0.44528	0.06315	0.51627	0.07358	0.66403	0.10157
0.44146	0.06328	0.50185	0.07372	0.66586	0.10189
0.44414	0.0635	0.51293	0.07386	0.66483	0.10198
0.44539	0.06363	0.50113	0.07403	0.66385	0.10216
0.45232	0.06376	0.52205	0.07417	0.66312	0.10249
0.44575	0.06398	0.50155	0.07439	0.67019	0.10262
0.46012	0.06411	0.5191	0.07448	0.66929	0.1029
0.455	0.06438	0.50564	0.07462	0.66818	0.10308
0.44868	0.06451	0.52363	0.07484	0.66617	0.10322
0.45932	0.06473	0.50775	0.07498	0.67361	0.1035
0.4521	0.06486	0.51459	0.0752	0.67859	0.10368
0.45997	0.06499	0.51144	0.07529	0.68298	0.104
0.4542	0.06521	0.52955	0.07543	0.68553	0.10409
0.45592	0.06534	0.51448	0.07565	0.68428	0.10428
0.47405	0.06565	0.53288	0.07579	0.6861	0.1046
0.45974	0.06574	0.51918	0.07601	0.68781	0.10469
0.47224	0.06587	0.53501	0.0761	0.68929	0.10501
0.46828	0.06613	0.52994	0.07637	0.68624	0.10519
0.46672	0.06622	0.53901	0.07651	0.68777	0.10547
0.47725	0.06648	0.51985	0.0766	0.68939	0.10561
0.46696	0.06666	0.53361	0.07682	0.69199	0.10579
0.46347	0.06679	0.52532	0.07696	0.69529	0.10606
0.47536	0.06701	0.53069	0.07714	0.69454	0.1062
0.46598	0.06714	0.53391	0.07727	0.69094	0.10638
0.47876	0.06745	0.54732	0.07741	0.69572	0.10671
0.46802	0.06753	0.53445	0.07763	0.69372	0.1068
0.47077	0.06767	0.55367	0.07772	0.68975	0.10716
0.48547	0.06793	0.54186	0.07799	0.69194	0.1073
0.47047	0.06802	0.55694	0.07813	0.69769	0.10758
0.47997	0.06832	0.54132	0.07817	0.70239	0.10776
0.49045	0.06846	0.55308	0.07844	0.7002	0.10794
0.49142	0.06863	0.53936	0.07858	0.69837	0.10822
0.48619	0.06885	0.54418	0.07876	0.70038	0.1084
0.49488	0.06898	0.5491	0.07889	0.70441	0.10854
0.47799	0.06925	0.5648	0.07903	0.70731	0.10882
0.48704	0.06938	0.56022	0.07925	0.70696	0.109
0.49669	0.06951	0.56494	0.07934	0.71335	0.10932
0.48678	0.06982	0.55411	0.07961	0.71299	0.1095
0.49272	0.0699	0.56929	0.07975	0.71778	0.10978
0.49784	0.07021	0.55192	0.07984	0.72106	0.10996
0.48947	0.07034	0.56857	0.08006	0.72029	0.1101
0.48462	0.07047	0.55586	0.0802	0.72199	0.11038
0.50177	0.07074	0.56722	0.08033	0.72332	0.11056
0.50125	0.07087	0.56146	0.08051	0.72301	0.11074
0.49325	0.07118	0.57882	0.08065	0.72051	0.11102
0.50719	0.07131	0.56499	0.08092	0.72146	0.11116
0.51182	0.07144	0.57917	0.08105	0.72052	0.11152
0.50479	0.07175	0.57256	0.08114	0.72138	0.11161
0.50042	0.07188	0.59308	0.08137	0.72441	0.11198
0.51844	0.07214	0.58938	0.0815	0.72047	0.11216
0.51472	0.07227	0.5926	0.08173	0.71564	0.1123
0.50881	0.07245	0.57623	0.08182	0.72168	0.11262
0.52531	0.07267	0.58222	0.08195	0.72594	0.11281
0.52591	0.07284	0.58191	0.08218	0.73157	0.11294
0.50989	0.0731	0.60301	0.08227	0.7432	0.11327
0.5293	0.07319	0.58346	0.08254	0.74708	0.1134
0.5309	0.07337	0.6026	0.08267	0.75111	0.11377
0.51574	0.07363	0.58799	0.08272	0.75362	0.11391
0.52976	0.07376	0.61087	0.08299	0.76158	0.11418
0.53751	0.07403	0.59293	0.08308	0.76299	0.11437
0.53062	0.0742	0.60985	0.0833	0.76166	0.1145
0.53402	0.07429	0.59971	0.08344	0.7647	0.11478
0.54212	0.0746	0.59917	0.08362	0.76591	0.11492
0.53863	0.07473	0.60896	0.08375	0.76764	0.1151
0.55372	0.07495	0.62104	0.08384	0.77008	0.11542
0.55271	0.07508	0.62098	0.08407	0.77173	0.11551
0.54754	0.07525	0.60718	0.0842	0.77597	0.11583
0.55862	0.07547	0.62675	0.08443	0.77946	0.11597
0.55401	0.0756	0.61508	0.08456	0.77955	0.11616
0.54972	0.07587	0.63222	0.08461	0.77817	0.11638
0.56443	0.07604	0.61503	0.08488	0.77753	0.11657
0.55494	0.07626	0.63052	0.08497	0.78126	0.11689
0.56273	0.07639	0.61885	0.08519	0.78367	0.11698
0.56756	0.07653	0.63536	0.08533	0.78596	0.11712
0.55363	0.07675	0.61898	0.08542	0.78876	0.11744
0.56981	0.07688	0.63271	0.08564	0.78943	0.11753
0.56699	0.07705	0.62112	0.08573	0.79699	0.11785
0.5655	0.07727	0.63527	0.086	0.7995	0.11804
0.5739	0.0774	0.62578	0.08614	0.80317	0.11827
0.56058	0.07771	0.64484	0.08618	0.80496	0.11845
0.56304	0.0778	0.63683	0.08645	0.8059	0.11859
0.57124	0.07806	0.64317	0.08654	0.80975	0.11882
0.56033	0.07824	0.64322	0.08677	0.81293	0.119
0.55907	0.07837	0.6358	0.0869	0.81329	0.11914
0.56925	0.07859	0.64918	0.08708	0.81278	0.11941
0.56766	0.07876	0.63307	0.08721	0.81645	0.1195
0.56006	0.07889	0.64297	0.08735	0.822	0.11983
0.57811	0.07916	0.63606	0.08757	0.82634	0.11996
0.57321	0.07929	0.65368	0.08766	0.83372	0.12019
0.56373	0.0796	0.64214	0.0878	0.83439	0.12038
0.5812	0.07968	0.66045	0.08802	0.83972	0.12051
0.57118	0.07999	0.64604	0.08812	0.84724	0.12074
0.56923	0.08012	0.66301	0.08834	0.85009	0.12088
0.57831	0.08025	0.64429	0.08847	0.85443	0.12102
0.57628	0.08052	0.6531	0.08865	0.85753	0.12125
0.57348	0.08065	0.65512	0.08879	0.8619	0.12139
0.58943	0.08091	0.67264	0.08892	0.86597	0.12161
0.58423	0.08104	0.65364	0.08915	0.86502	0.12175
0.57763	0.08117	0.67186	0.08924	0.8628	0.12198
0.58488	0.08148	0.6586	0.08937	0.86606	0.12212
0.58978	0.08157	0.68115	0.0896	0.87232	0.12226
0.58335	0.08188	0.67071	0.08969	0.8793	0.12244
0.58593	0.08205	0.66679	0.08991	0.88239	0.12258
0.59479	0.08218	0.68674	0.09	0.88211	0.12285
0.59095	0.08245	0.68079	0.09023	0.88104	0.12294
0.5894	0.08258	0.69014	0.09032	0.88543	0.12304
0.59595	0.08271	0.69532	0.09054	0.89599	0.12331
0.60012	0.08297	0.67766	0.09063	0.89857	0.1234
0.59448	0.08311	0.68617	0.09077	0.89996	0.12363
0.60825	0.08341	0.67922	0.09099	0.9018	0.12377
0.61685	0.08354	0.70124	0.09108	0.89831	0.12386
0.60311	0.08381	0.68861	0.09131	0.90108	0.12409
0.61597	0.08394	0.69854	0.0914	0.9005	0.12418
0.62819	0.08407	0.68209	0.09153	0.90518	0.12441
0.61016	0.08433	0.68604	0.09176	0.90427	0.1245
0.61957	0.08446	0.68711	0.09185	0.90311	0.12464
0.63453	0.0846	0.69488	0.09212	0.90502	0.12492
0.61808	0.08486	0.71211	0.09216	0.90735	0.12496
0.62957	0.08499	0.6973	0.09239	0.90059	0.12524
0.63489	0.08525	0.7113	0.09252	0.90511	0.12538
0.61981	0.08539	0.71769	0.0927	0.90252	0.12547
0.64057	0.08565	0.71353	0.09284	0.90101	0.1257
0.64183	0.08578	0.70643	0.09293	0.8971	0.12583
0.63323	0.08596	0.70262	0.09311	0.90113	0.12606
0.6512	0.08618	0.72199	0.09324	0.90399	0.1262
0.64593	0.08631	0.70544	0.09347	0.90385	0.12634
0.64678	0.08657	0.72297	0.0936	0.89482	0.12652
0.65273	0.0867	0.71201	0.09365	0.89271	0.12666
0.64906	0.08683	0.72297	0.09392	0.89671	0.12694
0.64416	0.0871	0.71408	0.09401	0.90336	0.12707
0.65894	0.08718	0.71397	0.09419	0.90968	0.12735
0.64464	0.08749	0.73201	0.09432	0.9069	0.12749
0.65424	0.08762	0.72024	0.09455	0.90693	0.12762
0.66264	0.08771	0.72808	0.09464	0.90532	0.12781
0.65501	0.08797	0.73873	0.09486	0.90817	0.12794
0.66942	0.08815	0.72496	0.09495	0.91257	0.12813
0.6586	0.08837	0.74078	0.09504	0.91854	0.12836
0.66869	0.0885	0.73171	0.09527	0.9198	0.12849
0.67799	0.08863	0.75106	0.09536	0.92511	0.12872
0.66975	0.08885	0.75022	0.09558	0.9302	0.12886
0.68255	0.08898	0.72999	0.09567	0.93118	0.12895
0.67124	0.08929	0.74797	0.0959	0.94041	0.12923
0.66798	0.08942	0.73062	0.09599	0.9327	0.12937
0.68569	0.08951	0.73166	0.09621	0.9311	0.12964
0.67407	0.08977	0.7486	0.0963	0.93167	0.12973
0.67669	0.0899	0.74171	0.09653	0.93268	0.12983
0.67325	0.09012	0.75603	0.09662	0.93526	0.1301
0.67745	0.09025	0.74014	0.09675	0.93799	0.13024
0.69078	0.09039	0.75382	0.09698	0.93941	0.13047
0.67946	0.09065	0.74248	0.09707	0.93615	0.13061
0.69101	0.09078	0.75592	0.0972	0.93712	0.13074
0.68541	0.09104	0.73946	0.09743	0.93772	0.13097
0.68924	0.09113	0.75406	0.09756	0.94515	0.13111
0.70167	0.09126	0.76068	0.09774	0.94813	0.13139
0.68474	0.09153	0.76587	0.09788	0.94859	0.13148
0.68395	0.0917	0.74964	0.09801	0.94389	0.13161
0.69153	0.09192	0.76873	0.09824	0.93699	0.13189
0.68707	0.09205	0.75764	0.09833	0.93687	0.13198
0.70494	0.09227	0.7681	0.09842	0.94121	0.13226
0.69185	0.09245	0.76001	0.09869	0.94957	0.13239
0.69515	0.09258	0.77366	0.09882	0.9552	0.13253
0.70928	0.09284	0.77606	0.099	0.96	0.13276
0.69757	0.09293	0.75968	0.09914	0.96527	0.1329
0.71933	0.09319	0.75825	0.09923	0.96885	0.13313
0.71662	0.09337	0.75907	0.09945	0.9718	0.13327
0.70499	0.0935	0.77512	0.09959	0.97459	0.1334
0.72064	0.09372	0.75795	0.09981	0.98043	0.13363
0.71273	0.09385	0.7694	0.09995	0.97981	0.13372
0.70378	0.09398	0.75893	0.09999	0.98433	0.134
0.72014	0.0942	0.78269	0.10026	0.98499	0.13409
0.71277	0.09438	0.77619	0.1004	0.98786	0.13418
0.72563	0.09464	0.78501	0.10058	0.98782	0.13446
0.73526	0.09477	0.768	0.10071	0.9898	0.1346
0.71751	0.09486	0.7775	0.10085	0.98961	0.13478
0.7395	0.09512	0.76949	0.10103	0.99474	0.13492
0.73526	0.09525	0.78504	0.10116	0.99355	0.13505
0.74019	0.09547	0.77159	0.10143	0.99668	0.13524
0.7442	0.09565	0.78913	0.10152	0.99577	0.13538
0.73335	0.09578	0.77223	0.10161	0.99493	0.13565
0.73821	0.09604	0.78882	0.10188	0.99386	0.13574
0.73606	0.09613	0.78313	0.10202	0.99507	0.13597
0.73709	0.09639	0.79482	0.10219	0.99591	0.13611
0.75064	0.09653	0.77447	0.10233	1.00015	0.13625
0.7329	0.09661	0.77959	0.10247	1.00182	0.13648
0.75229	0.09688	0.7792	0.10273	1.00318	0.13657
0.74877	0.09705	0.79373	0.10282	1.00307	0.13671
0.74031	0.09727	0.78039	0.10305	1.00436	0.13694
0.74751	0.0974	0.78386	0.10318	1.00502	0.13707
0.74188	0.09753	0.79865	0.10332	1.00606	0.13735
0.74925	0.09775	0.79005	0.10354	1.00746	0.13744
0.7522	0.09793	0.7971	0.10368	1.01377	0.13767
0.73754	0.09819	0.78627	0.10381	1.01296	0.13781
0.74633	0.09832	0.80247	0.10404	1.01251	0.13794
0.75653	0.09841	0.78108	0.10413	1.01219	0.13817
0.74506	0.09872	0.80278	0.1044	1.01482	0.13831
0.75958	0.09885	0.80437	0.10453	1.02261	0.13849
0.75116	0.09907	0.79383	0.10462	1.02513	0.13863
0.75414	0.0992	0.80009	0.10489	1.0291	0.13877
0.7657	0.09938	0.78899	0.10503	1.03155	0.13905
0.75587	0.0996	0.79817	0.10525	1.03334	0.13914
0.76378	0.09973	0.79473	0.10539	1.03131	0.13937
0.76927	0.09999	0.80609	0.10552	1.03597	0.1395
0.75908	0.10012	0.80023	0.10575	1.03609	0.1396
0.77258	0.10025	0.8114	0.10588	1.04246	0.13983
0.76554	0.10052	0.8042	0.10615	1.04219	0.13996
0.76335	0.10065	0.80782	0.10629	1.04848	0.14019
0.7805	0.10087	0.80782	0.10647	1.05108	0.14028
0.77241	0.10104	0.81297	0.1066	1.05317	0.14042
0.78729	0.10126	0.8258	0.10674	1.05414	0.14065
0.78001	0.10139	0.81669	0.10696	1.05637	0.14074
0.77128	0.10153	0.83082	0.1071	1.05482	0.14102
0.79026	0.10179	0.82254	0.10732	1.04874	0.14116
0.77657	0.10192	0.82943	0.10746	1.04447	0.1412
0.77814	0.10205	0.82132	0.10759	1.04794	0.14148
0.79299	0.10232	0.83564	0.10782	1.05183	0.14161
0.78318	0.10245	0.82873	0.10795	1.05464	0.14184
0.79566	0.10267	0.83959	0.10822	1.03819	0.14194
0.79752	0.10284	0.83977	0.10836	1.04532	0.14207
0.79458	0.10297	0.8225	0.1084	1.05332	0.1423
0.79513	0.10324	0.83873	0.10872	1.06082	0.14244
0.80148	0.10332	0.82383	0.10881	1.06623	0.14272
0.79315	0.10363	0.84284	0.10903	1.07204	0.14281
0.8029	0.10376	0.82921	0.10917	1.07498	0.1429
0.81238	0.10389	0.84736	0.10939	1.08211	0.14317
0.8058	0.10411	0.83185	0.10953	1.08524	0.14327
0.81556	0.10425	0.83308	0.10966	1.08939	0.14349
0.81444	0.10438	0.82989	0.10989	1.08878	0.14359
0.81492	0.10464	0.83256	0.11002	1.09341	0.14382
0.82083	0.10477	0.8506	0.11029	1.09641	0.14391
0.80827	0.10504	0.83583	0.11038	1.09583	0.14405
0.82409	0.10512	0.85896	0.11052	1.10022	0.14427
0.81058	0.10539	0.84034	0.11079	1.09894	0.14437
0.81135	0.10552	0.8407	0.11092	1.10231	0.1445
0.82855	0.10565	0.84706	0.11119	1.10408	0.14473
0.81398	0.10591	0.84898	0.11133	1.10851	0.14478
0.82735	0.10604	0.84726	0.11155	1.11056	0.14505
0.81615	0.10626	0.84236	0.11169	1.1127	0.14515
0.82995	0.10639	0.85789	0.11182	1.11669	0.14533
0.83196	0.10653	0.84818	0.11205	1.11837	0.14547
0.82172	0.10679	0.86422	0.11218	1.12254	0.14556
0.84103	0.10692	0.86008	0.11245	1.1259	0.14574
0.83183	0.10718	0.85871	0.11254	1.12763	0.14588
0.82283	0.10732	0.86871	0.11268	1.12847	0.14597
0.83938	0.1074	0.85062	0.11295	1.13148	0.1462
0.82293	0.10767	0.87478	0.11304	1.13362	0.14629
0.83016	0.1078	0.85823	0.11335	1.13213	0.14652
0.83899	0.10806	0.85559	0.11349	1.13535	0.14661
0.83281	0.10819	0.87559	0.11358	1.13544	0.1468
0.84569	0.10832	0.86195	0.11385	1.13338	0.14694
0.83573	0.10854	0.8671	0.11398	1.13913	0.14703
0.83903	0.10868	0.86338	0.11421	1.13828	0.14721
0.85534	0.10898	0.86578	0.11434	1.13761	0.14735
0.84364	0.10911	0.88436	0.11452	1.13992	0.14758
0.84884	0.1092	0.87121	0.11475	1.13687	0.14762
0.85324	0.10946	0.88329	0.11488	1.13757	0.14776
0.8409	0.1096	0.88376	0.11515	1.12791	0.14799
0.86178	0.10982	0.88502	0.11524	1.1299	0.14813
0.85471	0.10999	0.89408	0.11551	1.12978	0.14831
0.86787	0.11021	0.87997	0.11564	1.1327	0.14845
0.85774	0.11034	0.87801	0.11578	1.13321	0.14854
0.85564	0.11047	0.88368	0.11605	1.14082	0.14877
0.87113	0.11074	0.88461	0.11619	1.14749	0.14886
0.85911	0.11082	0.89408	0.11641	1.14455	0.14914
0.87236	0.11113	0.88637	0.11654	1.15166	0.14918
0.88418	0.11126	0.88981	0.11668	1.15349	0.14932
0.87782	0.11139	0.88587	0.1169	1.1628	0.14955
0.88812	0.11161	0.89417	0.11704	1.16206	0.14969
0.88574	0.11175	0.91173	0.11735	1.16257	0.14987
0.8759	0.11188	0.90439	0.11749	1.16387	0.14996
0.89146	0.1121	0.90789	0.11758	1.16549	0.1501
0.87983	0.11223	0.9048	0.11785	1.16848	0.15028
0.89427	0.11249	0.90073	0.11798	1.16827	0.15038
0.87778	0.11258	0.92225	0.11821	1.17409	0.15051
0.88476	0.11271	0.90577	0.11834	1.17526	0.15074
0.89491	0.11297	0.92618	0.11857	1.17973	0.15083
0.88467	0.11311	0.91432	0.1187	1.18251	0.15106
0.90622	0.11332	0.91934	0.11884	1.18139	0.15116
0.88991	0.11346	0.93911	0.11911	1.18361	0.15134
0.91082	0.11368	0.92166	0.1192	1.18358	0.15148
0.89432	0.11381	0.93893	0.11933	1.18498	0.15157
0.89482	0.11394	0.92841	0.1196	1.18893	0.1518
0.90927	0.1142	0.94549	0.11969	1.18676	0.15189
0.90229	0.11429	0.93257	0.11996	1.19132	0.15198
0.91364	0.11455	0.93656	0.1201	1.19443	0.15221
0.8979	0.11468	0.93283	0.12032	1.19563	0.1523
0.91711	0.11477	0.94437	0.12046	1.19924	0.15253
0.90479	0.11503	0.9578	0.12059	1.19746	0.15262
0.90623	0.11517	0.9511	0.12082	1.19655	0.15281
0.91046	0.11539	0.96101	0.12095	1.19727	0.15294
0.91336	0.11552	0.94945	0.12118	1.19777	0.15304
0.90876	0.11574	0.96938	0.12127	1.1982	0.15322
0.91086	0.11587	0.95828	0.1214	1.19698	0.15336
0.92875	0.116	0.97689	0.12167	1.19994	0.15359
0.91681	0.11622	0.96164	0.12176	1.19629	0.15368
0.93321	0.11635	0.98204	0.12199	1.19889	0.15377
0.93285	0.11653	0.97136	0.12212	1.20307	0.154
0.92085	0.11675	0.97883	0.12226	1.20386	0.15414
0.93598	0.11688	0.97417	0.12244	1.21101	0.15432
0.92073	0.1171	0.98938	0.12257	1.21032	0.15441
0.93751	0.11727	0.9874	0.1228	1.21516	0.15455
0.92674	0.11749	0.99657	0.12289	1.21854	0.15473
0.94024	0.11762	0.9825	0.12302	1.21782	0.15487
0.9398	0.11775	0.99874	0.12329	1.2209	0.1551
0.94068	0.11797	0.98571	0.12334	1.22076	0.15515
0.94924	0.1181	0.99716	0.12361	1.22783	0.15528
0.93782	0.11824	0.99246	0.1237	1.23042	0.15551
0.95289	0.11846	0.99427	0.12392	1.23279	0.15561
0.94798	0.11859	1.00136	0.12406	1.23492	0.15579
0.95152	0.11885	1.00634	0.12415	1.23418	0.15593
0.94807	0.11894	1.00051	0.12437	1.23975	0.15602
0.95811	0.1192	0.99039	0.12451	1.24228	0.1562
0.96484	0.11933	0.98941	0.1246	1.2394	0.15634
0.95745	0.11946	0.98531	0.12482	1.24009	0.15652
0.96911	0.11968	0.99039	0.12496	1.2392	0.15661
0.95261	0.11977	0.9908	0.12523	1.24144	0.15671
0.97356	0.11999	0.99645	0.12532	1.24396	0.15694
0.95583	0.12012	0.9893	0.12554	1.24227	0.15703
0.95982	0.12025	1.00056	0.12568	1.24641	0.15726
0.95883	0.12047	1.0135	0.12577	1.24492	0.15735
0.95973	0.1206	1.01413	0.12604	1.25064	0.15749
0.9744	0.12087	1.01833	0.12617	1.2521	0.15767
0.9683	0.12096	1.01941	0.12635	1.25166	0.15776
0.97735	0.12122	1.01259	0.12649	1.25349	0.15794
0.97006	0.12135	0.99801	0.12662	1.25531	0.15808
0.98302	0.12148	1.01116	0.12685	1.25968	0.15817
0.97302	0.12166	1.00392	0.12694	1.26454	0.1584
0.99026	0.12179	1.02597	0.12721	1.26373	0.1585
0.9814	0.12201	1.00836	0.12734	1.27124	0.15872
0.99437	0.12214	1.02792	0.12743	1.27256	0.15882
0.9866	0.12227	1.00285	0.1277	1.27694	0.159
0.99723	0.12254	1.0175	0.12784	1.28349	0.15909
0.98299	0.12258	1.01541	0.12802	1.28404	0.15923
1.00322	0.12284	1.03605	0.12815	1.2893	0.15941
0.99777	0.12297	1.02338	0.12838	1.29487	0.1595
1.00488	0.12319	1.04275	0.12851	1.29357	0.1596
0.99416	0.12332	1.03748	0.12865	1.29631	0.15978
0.98999	0.12346	1.04352	0.12892	1.2987	0.15987
1.00739	0.12372	1.03176	0.12896	1.30124	0.16006
0.98991	0.12376	1.05489	0.12923	1.30335	0.16019
1.00546	0.12403	1.0401	0.12937	1.30676	0.16033
0.98882	0.12416	1.0489	0.12946	1.30949	0.16047
1.00627	0.12438	1.04376	0.12968	1.30801	0.16056
0.99255	0.12451	1.0534	0.12982	1.3091	0.1607
0.99222	0.12464	1.04775	0.12999	1.31025	0.16083
0.99086	0.12486	1.06518	0.13013	1.31204	0.16093
0.99389	0.12499	1.0582	0.13026	1.31117	0.16111
1.01042	0.12512	1.06917	0.13045	1.30972	0.1612
0.9938	0.12539	1.05915	0.13058	1.31228	0.16139
1.00876	0.12552	1.07395	0.13081	1.31446	0.16148
1.00429	0.12578	1.06004	0.1309	1.31442	0.16166
1.00735	0.12587	1.05545	0.13112	1.31369	0.1618
1.00569	0.12613	1.06448	0.13125	1.31707	0.16189
1.00064	0.12626	1.06735	0.13134	1.3194	0.16207
1.02059	0.12635	1.0851	0.13157	1.3191	0.16216
1.00981	0.12661	1.08418	0.1317	1.32171	0.16235
1.01038	0.12675	1.08978	0.13188	1.32506	0.16244
1.01155	0.12696	1.07498	0.13202	1.32575	0.16253
1.011	0.1271	1.09511	0.13211	1.33348	0.16276
1.02689	0.12727	1.08445	0.13233	1.33702	0.16281
1.02248	0.12753	1.09662	0.13247	1.34129	0.16299
1.02917	0.12762	1.09304	0.13269	1.34457	0.16313
1.0246	0.12789	1.08186	0.13274	1.34418	0.16317
1.02102	0.12802	1.1015	0.13301	1.34423	0.16336
1.0348	0.12815	1.08883	0.1331	1.34266	0.1635
1.02553	0.12837	1.09145	0.13328	1.34371	0.16363
1.03565	0.1285	1.09482	0.13341	1.34823	0.16372
1.04663	0.12863	1.10836	0.1335	1.34922	0.16386
1.03943	0.12885	1.1107	0.13373	1.34976	0.164
1.05302	0.12898	1.09414	0.13382	1.35293	0.16409
1.03628	0.12925	1.11871	0.13404	1.35846	0.16432
1.0519	0.12933	1.11282	0.13413	1.3595	0.16441
1.03732	0.1296	1.10251	0.13436	1.36071	0.16446
1.0451	0.12973	1.11353	0.13445	1.35336	0.16469
1.05904	0.12986	1.11771	0.13463	1.35343	0.16478
1.05037	0.13008	1.11209	0.13476	1.35748	0.16496
1.06254	0.13021	1.12059	0.13499	1.36152	0.16506
1.05376	0.13043	1.10111	0.13508	1.36419	0.16515
1.06727	0.13056	1.12008	0.1353	1.36696	0.16533
1.06332	0.13069	1.10904	0.13539	1.36429	0.16542
1.07079	0.13091	1.12387	0.13548	1.36689	0.16561
1.06818	0.13104	1.12208	0.13575	1.36991	0.1657
1.06333	0.13131	1.12716	0.13584	1.37162	0.16588
1.0631	0.13139	1.12811	0.13607	1.37411	0.16597
1.05894	0.13148	1.11274	0.13616	1.37762	0.16611
1.07194	0.13179	1.12918	0.13638	1.38303	0.16625
1.06456	0.13192	1.1253	0.13647	1.3838	0.16634
1.07862	0.13214	1.14171	0.13661	1.38062	0.16652
1.08266	0.13227	1.14487	0.13679	1.38422	0.16661
1.08704	0.13249	1.13296	0.13692	1.38334	0.16671
1.08321	0.13262	1.14875	0.13715	1.38804	0.16694
1.07086	0.13275	1.13613	0.13724	1.39264	0.16698
1.08526	0.13297	1.14769	0.13746	1.3982	0.16716
1.0712	0.1331	1.14555	0.13755	1.39613	0.16726
1.09165	0.13337	1.14518	0.13773	1.39775	0.16735
1.07586	0.13346	1.1571	0.13782	1.40206	0.16753
1.07931	0.13359	1.1429	0.13796	1.40293	0.16762
1.09267	0.13385	1.16794	0.13818	1.4089	0.16781
1.08399	0.13398	1.16817	0.13827	1.41097	0.1679
1.09481	0.1342	1.15524	0.13845	1.41273	0.16799
1.08437	0.13433	1.16954	0.13859	1.41265	0.16817
1.10546	0.13455	1.17191	0.13877	1.41569	0.16827
1.08766	0.13468	1.15631	0.13886	1.41962	0.16845
1.08997	0.13482	1.17791	0.13908	1.41922	0.16854
1.10624	0.13508	1.17289	0.13917	1.41841	0.16859
1.09357	0.13517	1.15995	0.13935	1.41769	0.16877
1.10661	0.1353	1.17884	0.13949	1.41713	0.16886
1.09118	0.13556	1.18307	0.13967	1.41813	0.16905
1.11007	0.13565	1.16722	0.13976	1.41625	0.16914
1.09775	0.13591	1.18924	0.13985	1.42338	0.16923
1.10077	0.13604	1.18679	0.14003	1.4261	0.16941
1.0998	0.13626	1.18726	0.14016	1.42366	0.1695
1.10387	0.13639	1.18554	0.14039	1.43176	0.16969
1.12039	0.13653	1.16866	0.14048	1.43423	0.16973
1.1124	0.13675	1.1798	0.1407	1.4325	0.16983
1.13008	0.13688	1.17166	0.14079	1.43538	0.17006
1.11205	0.13714	1.17475	0.14097	1.43898	0.17015
1.13149	0.13723	1.19153	0.14111	1.44052	0.17028
1.12726	0.13736	1.1749	0.1412	1.43847	0.17038
1.12938	0.13762	1.19367	0.14142	1.44013	0.17056
1.12668	0.13771	1.17634	0.14151	1.44237	0.17065
1.13243	0.13797	1.18991	0.14165	1.44354	0.17074
1.13828	0.13811	1.17761	0.14187	1.44791	0.17093
1.1402	0.13832	1.17943	0.14196	1.45205	0.17097
1.14309	0.13841	1.20266	0.14219	1.45283	0.17106
1.12548	0.13854	1.18559	0.14228	1.45358	0.17129
1.14687	0.13876	1.18967	0.14246	1.45395	0.17134
1.13164	0.13889	1.19279	0.14259	1.45466	0.17152
1.13504	0.13903	1.18986	0.14282	1.45827	0.17161
1.13146	0.13925	1.21033	0.14286	1.45766	0.1718
1.14397	0.13938	1.20916	0.14313	1.45262	0.17189
1.14487	0.13964	1.21005	0.14322	1.45054	0.17198
1.143	0.13977	1.20925	0.1434	1.44828	0.17212
1.1476	0.13999	1.18975	0.14354	1.44527	0.17221
1.14662	0.14008	1.20181	0.14367	1.44833	0.17235
1.16244	0.14021	1.19679	0.14385	1.45097	0.17253
1.14972	0.14043	1.21025	0.14399	1.44983	0.17258
1.1676	0.14056	1.18808	0.14408	1.45554	0.17281
1.15927	0.14078	1.20103	0.1443	1.45706	0.1729
1.16858	0.14091	1.19127	0.14444	1.4601	0.17308
1.15549	0.14104	1.21146	0.14466	1.46129	0.17317
1.17519	0.14126	1.19903	0.14475	1.46327	0.17327
1.16168	0.14135	1.19693	0.14502	1.46564	0.1735
1.18548	0.14161	1.19925	0.14511	1.46775	0.17354
1.16729	0.14175	1.21455	0.1452	1.47417	0.17363
1.18092	0.14192	1.20843	0.14547	1.47946	0.17386
1.17315	0.14205	1.22061	0.1456	1.48279	0.17395
1.18598	0.14218	1.22186	0.14578	1.48373	0.17409
1.17912	0.14236	1.21595	0.14592	1.48674	0.17418
1.19314	0.14249	1.20089	0.14605	1.48828	0.17427
1.18374	0.14275	1.20966	0.14628	1.48656	0.17446
1.19891	0.1428	1.21113	0.14637	1.48776	0.17455
1.19805	0.14306	1.22831	0.14664	1.49112	0.17473
1.19976	0.14315	1.2128	0.14677	1.4891	0.17483
1.20418	0.14337	1.22922	0.14686	1.48941	0.17492
1.18567	0.14346	1.21757	0.14709	1.48946	0.1751
1.20637	0.14372	1.23754	0.14722	1.49211	0.17519
1.18679	0.14381	1.23986	0.14745	1.49731	0.17538
1.20642	0.14394	1.24743	0.14754	1.49918	0.17547
1.19628	0.14416	1.23233	0.14767	1.49746	0.17556
1.21391	0.14425	1.25238	0.1479	1.50118	0.17574
1.20103	0.14446	1.23834	0.14799	1.50367	0.17583
1.21519	0.1446	1.24392	0.14826	1.50615	0.17602
1.21785	0.14477	1.24159	0.14835	1.50679	0.17606
1.21599	0.1449	1.25836	0.14848	1.50931	0.17616
1.20366	0.14503	1.25666	0.14866	1.51369	0.17639
1.20651	0.14525	1.25461	0.1488	1.5129	0.17648
1.20842	0.14534	1.24101	0.14889	1.51654	0.17661
1.21597	0.14561	1.24052	0.14911	1.51964	0.17671
1.20706	0.14569	1.25031	0.14925	1.52287	0.17689
1.20687	0.14591	1.24906	0.14947	1.52353	0.17698
1.22694	0.146	1.25941	0.14961	1.52377	0.17707
1.21626	0.14622	1.25935	0.14979	1.52706	0.17726
1.23218	0.14635	1.2662	0.14992	1.52613	0.1773
1.21647	0.14661	1.27101	0.1501	1.52538	0.17744
1.23584	0.14666	1.2648	0.15024	1.52432	0.17762
1.22857	0.14692	1.25866	0.15033	1.52441	0.17767
1.24038	0.14705	1.2733	0.1506	1.52986	0.17785
1.2238	0.14714	1.27906	0.15069	1.53334	0.17794
1.23463	0.14736	1.26759	0.15091	1.53601	0.17813
1.22604	0.14745	1.28254	0.15105	1.53874	0.17822
1.23288	0.14767	1.26596	0.15109	1.53893	0.17831
1.24469	0.1478	1.28627	0.15136	1.54131	0.1785
1.23885	0.14802	1.27001	0.15145	1.54378	0.17859
1.25196	0.14815	1.28225	0.15168	1.54294	0.17868
1.23831	0.14819	1.2781	0.15177	1.54149	0.17886
1.25808	0.14846	1.29164	0.1519	1.54275	0.17891
1.24779	0.14854	1.27443	0.15213	1.5426	0.17914
1.25648	0.14876	1.28997	0.15222	1.54117	0.17923
1.24933	0.14885	1.28808	0.15249	1.54843	0.17937
1.25092	0.14907	1.29027	0.15258	1.55172	0.17946
1.262	0.1492	1.27724	0.15267	1.55375	0.17955
1.25942	0.14938	1.27966	0.15294	1.55525	0.17973
1.27034	0.14946	1.28131	0.15303	1.55699	0.17983
1.26947	0.14973	1.28294	0.15325	1.55727	0.18001
1.27562	0.14982	1.2948	0.15339	1.55527	0.1801
1.26442	0.1499	1.30434	0.15348	1.55601	0.18019
1.26501	0.15012	1.30613	0.1537	1.55957	0.18038
1.2745	0.15025	1.29837	0.15384	1.55981	0.18047
1.26844	0.15043	1.31606	0.15406	1.56294	0.18065
1.28428	0.15056	1.31448	0.1542	1.5653	0.18074
1.26798	0.15078	1.31803	0.15429	1.56465	0.18083
1.27829	0.15087	1.30568	0.15451	1.56209	0.18097
1.27155	0.15096	1.32797	0.1546	1.56395	0.18111
1.28279	0.15122	1.32242	0.15483	1.5686	0.18129
1.29258	0.15126	1.33771	0.15492	1.57038	0.18134
1.27363	0.15153	1.34084	0.15514	1.57129	0.18143
1.29466	0.15161	1.3271	0.15523	1.5782	0.18166
1.28429	0.15183	1.33473	0.15537	1.58057	0.18171
1.29771	0.15196	1.33675	0.15555	1.58569	0.18189
1.27884	0.15205	1.34819	0.15564	1.58759	0.18198
1.2898	0.15227	1.33243	0.15577	1.59096	0.18212
1.28472	0.15236	1.33071	0.15595	1.59535	0.18226
1.30117	0.15262	1.34887	0.15604	1.59623	0.18235
1.29604	0.15271	1.33852	0.15627	1.60197	0.18249
1.30634	0.1528	1.35873	0.1564	1.60303	0.18258
1.29686	0.15306	1.36592	0.15658	1.60296	0.18267
1.29711	0.15315	1.36515	0.15672	1.60303	0.18285
1.31384	0.15337	1.35503	0.15681	1.60603	0.18294
1.31142	0.1535	1.35531	0.15699	1.60752	0.18313
1.32425	0.15368	1.37376	0.15708	1.60576	0.18322
1.30473	0.15381	1.38261	0.1573	1.60259	0.18336
1.3266	0.15389	1.36242	0.15739	1.60334	0.18345
1.31578	0.15411	1.38376	0.15748	1.60697	0.18354
1.32874	0.1542	1.37437	0.15771	1.60981	0.18372
1.32604	0.15446	1.3734	0.15775	1.60876	0.18382
1.33896	0.15455	1.3953	0.15798	1.61079	0.18391
1.324	0.15464	1.38232	0.15807	1.60887	0.18405
1.32619	0.15486	1.39861	0.15816	1.60725	0.18414
1.32871	0.15499	1.39953	0.15834	1.61	0.18437
1.32666	0.15517	1.38494	0.15847	1.61387	0.18446
1.34334	0.1553	1.38334	0.15861	1.62192	0.1846
1.32981	0.15539	1.40504	0.15874	1.62344	0.18469
1.3346	0.15556	1.38869	0.15883	1.6261	0.18478
1.33444	0.15569	1.39842	0.15901	1.62961	0.18496
1.33229	0.15587	1.40873	0.1591	1.6302	0.18506
1.35133	0.156	1.40855	0.15933	1.63292	0.18515
1.33428	0.15609	1.4147	0.15942	1.6365	0.18528
1.35224	0.15631	1.41061	0.15955	1.64261	0.18538
1.33646	0.15639	1.40665	0.15968	1.6459	0.18556
1.33767	0.15661	1.42423	0.15977	1.64564	0.18565
1.34329	0.15675	1.42516	0.15995	1.64938	0.18579
1.34623	0.15692	1.4185	0.16004	1.65163	0.18588
1.36349	0.15705	1.4354	0.16013	1.65169	0.18597
1.3464	0.15714	1.42027	0.16027	1.65476	0.18616
1.36001	0.15736	1.41926	0.1604	1.65715	0.18625
1.35436	0.15745	1.42037	0.16058	1.65878	0.18638
1.37272	0.15758	1.42778	0.16063	1.66316	0.18648
1.37334	0.15775	1.44282	0.16085	1.66396	0.18657
1.3589	0.15789	1.42492	0.16094	1.66331	0.18671
1.37717	0.1581	1.43118	0.16099	1.66548	0.1868
1.35878	0.15815	1.4454	0.16121	1.6673	0.18698
1.37035	0.15841	1.43069	0.1613	1.67005	0.18707
1.3683	0.1585	1.43879	0.16148	1.67057	0.18712
1.38381	0.15863	1.45229	0.16157	1.67259	0.1873
1.38567	0.15881	1.43468	0.16166	1.67326	0.18739
1.36967	0.15889	1.44639	0.1618	1.67539	0.18753
1.37822	0.15911	1.44745	0.16193	1.67534	0.18762
1.37815	0.1592	1.45755	0.16211	1.67297	0.18772
1.39407	0.15933	1.45862	0.16216	1.6718	0.18785
1.39879	0.15951	1.45549	0.16229	1.67183	0.18794
1.38236	0.1596	1.4634	0.16247	1.67524	0.18813
1.40247	0.15982	1.46508	0.16252	1.67659	0.18822
1.3862	0.15995	1.46345	0.1627	1.67946	0.18827
1.40492	0.15999	1.46348	0.16283	1.6755	0.18845
1.40943	0.16021	1.45268	0.16297	1.67535	0.18854
1.40661	0.16034	1.47297	0.16306	1.67552	0.18868
1.41242	0.16052	1.46432	0.16315	1.67731	0.18877
1.40156	0.1606	1.46015	0.16333	1.67538	0.18891
1.40216	0.16078	1.48315	0.16342	1.67729	0.18909
1.42162	0.16091	1.48999	0.1636	1.67833	0.18914
1.40552	0.161	1.47913	0.16369	1.67945	0.18932
1.40639	0.16118	1.49335	0.16378	1.67666	0.18941
1.42096	0.16131	1.49911	0.16396	1.66995	0.1895
1.41885	0.16148	1.48038	0.16405	1.66246	0.18969
1.43821	0.16161	1.48236	0.16418	1.6653	0.18978
1.41798	0.16166	1.50213	0.16427	1.66761	0.18987
1.41939	0.16188	1.48925	0.16436	1.67092	0.19006
1.43647	0.16196	1.50284	0.1645	1.67096	0.19019
1.43485	0.16214	1.50185	0.16459	1.67171	0.19038
1.43321	0.16227	1.50697	0.16477	1.67064	0.19047
1.43509	0.16245	1.51687	0.16486	1.67637	0.19065
1.43076	0.16254	1.50168	0.16495	1.6798	0.19079
1.44975	0.16262	1.5068	0.16513	1.68497	0.19088
1.45163	0.16284	1.5271	0.16522	1.69139	0.19106
1.43432	0.16289	1.52397	0.16535	1.69372	0.19116
1.45128	0.16302	1.51605	0.16544	1.69661	0.19125
1.44487	0.16324	1.52619	0.16553	1.69963	0.19143
1.43472	0.16328	1.51646	0.16567	1.6998	0.19152
1.45837	0.1635	1.53479	0.16576	1.70279	0.19171
1.44476	0.16359	1.54106	0.16589	1.70392	0.1918
1.44727	0.16376	1.52304	0.16598	1.7055	0.19198
1.46625	0.16385	1.52897	0.16603	1.70745	0.19207
1.45142	0.16398	1.52712	0.16621	1.71015	0.19217
1.45148	0.16411	1.53553	0.1663	1.71154	0.19235
1.46573	0.16425	1.54591	0.16643	1.71118	0.19244
1.44844	0.16433	1.52936	0.16652	1.71316	0.19258
1.46714	0.16455	1.54741	0.16661	1.71726	0.19272
1.47258	0.1646	1.53422	0.16675	1.71655	0.19281
1.45795	0.16482	1.54126	0.16684	1.7169	0.19299
1.47456	0.1649	1.55014	0.16702	1.71698	0.19308
1.47803	0.16508	1.53478	0.16706	1.72129	0.19327
1.46158	0.16517	1.55196	0.16715	1.72205	0.19336
1.47854	0.1653	1.56019	0.16733	1.72694	0.1934
1.48419	0.16547	1.55301	0.16738	1.73482	0.19363
1.4655	0.16556	1.55847	0.16756	1.73573	0.19372
1.48065	0.16578	1.54299	0.16765	1.73963	0.19386
1.48578	0.16582	1.54813	0.16778	1.74111	0.19395
1.47302	0.16591	1.56483	0.16787	1.73964	0.19405
1.49115	0.16613	1.54943	0.16796	1.73783	0.19423
1.47725	0.16622	1.55787	0.16814	1.74129	0.19432
1.47794	0.16639	1.5552	0.16819	1.73814	0.1945
1.49821	0.16653	1.57164	0.16828	1.73769	0.1946
1.47623	0.16661	1.57209	0.16846	1.74215	0.19469
1.47869	0.16679	1.55912	0.1685	1.74242	0.19487
1.49986	0.16688	1.56699	0.16864	1.74566	0.19496
1.49888	0.16705	1.56518	0.16873	1.74753	0.19515
1.4854	0.16714	1.56298	0.16886	1.75121	0.19524
1.49374	0.16727	1.57876	0.16895	1.75201	0.19533
1.49849	0.16745	1.56052	0.16904	1.75437	0.19547
1.50393	0.16754	1.57024	0.16922	1.75659	0.19561
1.50993	0.16771	1.57092	0.16927	1.75894	0.19579
1.48927	0.16784	1.57377	0.16936	1.76233	0.19583
1.49394	0.16802	1.58315	0.16954	1.76313	0.19593
1.51219	0.16811	1.56497	0.16958	1.76931	0.19611
1.49645	0.16819	1.57122	0.16976	1.77283	0.1962
1.49565	0.16837	1.59276	0.16985	1.77963	0.19638
1.51294	0.16846	1.5858	0.16999	1.78037	0.19648
1.51425	0.16859	1.58862	0.17008	1.78651	0.19661
1.5188	0.16876	1.57994	0.17017	1.78989	0.19671
1.50272	0.16885	1.58503	0.1703	1.79237	0.1968
1.50781	0.16907	1.60062	0.17039	1.79799	0.19698
1.52379	0.16911	1.59469	0.17057	1.79949	0.19703
1.52546	0.16933	1.5922	0.17062	1.80361	0.19721
1.51051	0.16942	1.58789	0.17071	1.80689	0.1973
1.51452	0.16955	1.58424	0.17089	1.8054	0.19735
1.52417	0.16973	1.60271	0.17098	1.80683	0.19753
1.53373	0.16982	1.60324	0.17111	1.80746	0.19762
1.53248	0.16999	1.5855	0.1712	1.81223	0.19776
1.51568	0.17008	1.58739	0.17138	1.81479	0.19785
1.53292	0.17021	1.60116	0.17147	1.8147	0.19794
1.54015	0.17039	1.60722	0.17152	1.8173	0.19808
1.519	0.17047	1.61088	0.1717	1.818	0.19817
1.53014	0.17069	1.58954	0.17179	1.81748	0.19831
1.52858	0.17078	1.59487	0.17192	1.81971	0.1984
1.52497	0.17082	1.61206	0.17201	1.81989	0.19845
1.54695	0.17104	1.59517	0.1721	1.82562	0.19863
1.527	0.17113	1.60589	0.17224	1.82838	0.19872
1.52912	0.17131	1.60405	0.17233	1.83176	0.19886
1.55069	0.17144	1.61022	0.17251	1.83257	0.19895
1.53504	0.17153	1.61431	0.1726	1.83259	0.19905
1.53391	0.1717	1.60276	0.17269	1.83259	0.19918
1.55475	0.17179	1.59967	0.17286	1.83297	0.19927
1.54099	0.17201	1.62094	0.17295	1.83873	0.19941
1.5478	0.1721	1.62654	0.17309	1.84164	0.1995
1.55526	0.17227	1.60996	0.17318	1.84089	0.19955
1.54229	0.1724	1.63292	0.17327	1.84526	0.19973
1.56397	0.17245	1.62484	0.17341	1.84538	0.19983
1.56559	0.17267	1.63017	0.1735	1.84772	0.19996
1.55082	0.17275	1.63211	0.17367	1.85082	0.20006
1.55277	0.17293	1.62573	0.17376	1.85146	0.2001
1.56002	0.17306	1.63775	0.17381	1.85362	0.20028
1.57319	0.17315	1.64107	0.17399	1.85646	0.20033
1.57332	0.17337	1.62614	0.17408	1.86246	0.20051
1.55921	0.17341	1.62852	0.17426	1.86367	0.20056
1.57593	0.17354	1.64098	0.17435	1.86076	0.20065
1.57789	0.17372	1.62769	0.17448	1.85898	0.20079
1.5675	0.17385	1.64511	0.17457	1.85967	0.20088
1.56188	0.17398	1.62945	0.17466	1.86507	0.20102
1.56867	0.17411	1.63245	0.17484	1.86718	0.20111
1.58374	0.1742	1.64879	0.17489	1.86675	0.20125
1.58301	0.17438	1.63213	0.17498	1.86757	0.20134
1.57102	0.17446	1.63894	0.17516	1.86819	0.20143
1.57721	0.17468	1.65243	0.17525	1.87211	0.20157
1.59419	0.17477	1.65209	0.17543	1.87529	0.20161
1.57642	0.17486	1.64363	0.17552	1.87673	0.20171
1.5873	0.17508	1.66436	0.17565	1.87766	0.20189
1.60065	0.17512	1.6453	0.17574	1.87655	0.20194
1.58592	0.17534	1.66843	0.17583	1.88043	0.20212
1.59738	0.17543	1.6679	0.17601	1.8818	0.20217
1.60455	0.17561	1.65052	0.17606	1.88275	0.2023
1.5889	0.17569	1.66506	0.17615	1.88312	0.20239
1.60119	0.17582	1.66684	0.17633	1.88206	0.20249
1.60706	0.17596	1.65176	0.17642	1.88725	0.20262
1.59126	0.17609	1.66348	0.1766	1.88862	0.20272
1.59517	0.17626	1.67227	0.17669	1.89343	0.20281
1.61248	0.17635	1.66197	0.17678	1.89753	0.20294
1.59794	0.17644	1.67546	0.17691	1.89744	0.20304
1.61421	0.17666	1.65936	0.177	1.89871	0.20317
1.60032	0.17675	1.6661	0.17718	1.89712	0.20327
1.6047	0.17692	1.68696	0.17727	1.8972	0.2034
1.62237	0.17701	1.6687	0.17732	1.89986	0.2035
1.62754	0.17718	1.66386	0.1775	1.90194	0.20354
1.61179	0.17727	1.68684	0.17759	1.90516	0.20368
1.63085	0.1774	1.68	0.17777	1.90389	0.20377
1.63287	0.17758	1.6755	0.17786	1.90299	0.20386
1.61886	0.17767	1.68265	0.17795	1.90173	0.204
1.64067	0.17775	1.67503	0.17808	1.89931	0.20409
1.63559	0.17793	1.69652	0.17817	1.89761	0.20427
1.62621	0.17802	1.69852	0.17835	1.89411	0.20432
1.63135	0.17819	1.68284	0.17844	1.89408	0.2045
1.63388	0.17832	1.6987	0.17849	1.89576	0.2046
1.64545	0.17846	1.69461	0.17867	1.89576	0.20469
1.64249	0.17859	1.67678	0.17876	1.90028	0.20483
1.63385	0.17868	1.68006	0.17894	1.90139	0.20492
1.64378	0.17885	1.69744	0.17903	1.90503	0.20506
1.64169	0.17903	1.68501	0.17912	1.90749	0.20515
1.64473	0.17938	1.70061	0.17925	1.90703	0.20524
1.64897	0.17973	1.6962	0.17934	1.91166	0.20542
1.65238	0.1799	1.69828	0.17952	1.91183	0.20551
1.65379	0.18008	1.69878	0.17966	1.91473	0.2057
1.67276	0.18017	1.69213	0.1797	1.91647	0.20579
1.67054	0.18034	1.69419	0.17988	1.91739	0.20588
1.65678	0.18043	1.71369	0.17997	1.91629	0.20602
1.67723	0.18052	1.71552	0.18011	1.91809	0.20611
1.68601	0.18074	1.69743	0.1802	1.91879	0.2062
1.66834	0.18078	1.71763	0.18033	1.92176	0.20634
1.67123	0.18096	1.72083	0.18051	1.92354	0.20643
1.69021	0.18109	1.70831	0.18056	1.92485	0.20661
1.67529	0.18113	1.71352	0.18074	1.92562	0.20671
1.67555	0.18131	1.73079	0.18083	1.92608	0.20684
1.68903	0.18139	1.71856	0.18092	1.92287	0.20694
1.69177	0.18157	1.73108	0.18105	1.92414	0.20703
1.67928	0.18166	1.72944	0.18114	1.92352	0.20721
1.69538	0.18175	1.73571	0.18123	1.92392	0.2073
1.69613	0.18192	1.74248	0.18141	1.9275	0.20739
1.68433	0.18201	1.73066	0.18146	1.9301	0.20758
1.68706	0.18218	1.73113	0.18164	1.92899	0.20762
1.69688	0.18227	1.75055	0.18173	1.9309	0.20781
1.69896	0.18245	1.74373	0.18191	1.93029	0.2079
1.70533	0.1828	1.73926	0.182	1.932	0.20808
1.70852	0.18315	1.74278	0.18204	1.93373	0.20817
1.71516	0.1835	1.7374	0.18222	1.93738	0.20827
1.71802	0.18368	1.75288	0.18231	1.93962	0.20845
1.70576	0.18381	1.73703	0.1824	1.94273	0.20854
1.72342	0.18385	1.74256	0.18254	1.94711	0.20863
1.72642	0.18403	1.76175	0.18263	1.95439	0.20882
1.71078	0.18411	1.76664	0.18281	1.95758	0.20886
1.71437	0.18429	1.76255	0.18285	1.96042	0.20905
1.73374	0.18438	1.76571	0.18303	1.96104	0.20914
1.72285	0.18446	1.75236	0.18312	1.96553	0.20927
1.72589	0.18464	1.76982	0.18317	1.97064	0.20937
1.73995	0.18473	1.76906	0.18335	1.97383	0.20946
1.7404	0.1849	1.75191	0.18344	1.97847	0.2096
1.73596	0.18495	1.76236	0.18357	1.97829	0.20969
1.73602	0.18508	1.75726	0.18366	1.98214	0.20978
1.74151	0.18525	1.76042	0.18375	1.98399	0.20992
1.73153	0.18534	1.76917	0.18393	1.97901	0.21001
1.74443	0.18547	1.75234	0.18402	1.98482	0.21019
1.73939	0.18556	1.75146	0.1842	1.98976	0.21028
1.73879	0.18574	1.77409	0.18429	1.99455	0.21042
1.75874	0.18582	1.75504	0.18434	2.00005	0.21047
1.74091	0.18591	1.75661	0.18452	2.0041	0.21056
1.74548	0.18609	1.77485	0.18461	2.00866	0.2107
1.76039	0.18618	1.77462	0.18479	2.01204	0.21079
1.74133	0.18626	1.7609	0.18488	2.01707	0.21093
1.74315	0.18644	1.78358	0.18497	2.01883	0.21102
1.7578	0.18648	1.77829	0.1851	2.02131	0.21106
1.76257	0.1867	1.78268	0.18519	2.02108	0.21125
1.74519	0.18679	1.78515	0.18537	2.02284	0.21129
1.74901	0.18692	1.78159	0.18546	2.02918	0.21143
1.77092	0.18701	1.79088	0.18555	2.03039	0.21152
1.75202	0.18714	1.79591	0.18573	2.03245	0.21157
1.75957	0.18727	1.7793	0.18582	2.03199	0.21171
1.77347	0.18736	1.77874	0.18596	2.03372	0.2118
1.7599	0.18745	1.79482	0.18605	2.0347	0.21194
1.76317	0.18762	1.77981	0.18614	2.03493	0.21198
1.77901	0.18771	1.78813	0.18632	2.03456	0.21207
1.78134	0.18789	1.80338	0.18641	2.03442	0.21221
1.7702	0.18797	1.81111	0.18659	2.03619	0.21226
1.7739	0.18815	1.81383	0.18663	2.04034	0.21244
1.78228	0.18824	1.79476	0.18672	2.04315	0.21249
1.77431	0.18832	1.79439	0.1869	2.04382	0.21253
1.78563	0.18846	1.81131	0.18695	2.04837	0.21272
1.7751	0.18854	1.81282	0.18713	2.04768	0.21276
1.78037	0.18868	1.79707	0.18722	2.04618	0.2129
1.77833	0.18885	1.8005	0.1874	2.04578	0.21299
1.77626	0.18889	1.81344	0.18748	2.04721	0.21308
1.78438	0.18907	1.80121	0.18757	2.04828	0.21317
1.79337	0.18916	1.82436	0.18771	2.05214	0.21327
1.80096	0.18933	1.80306	0.1878	2.05811	0.2134
1.78498	0.18942	1.80654	0.18798	2.05916	0.2135
1.80277	0.18951	1.82553	0.18807	2.06454	0.21363
1.80454	0.18968	1.80823	0.18816	2.06275	0.21372
1.78865	0.18977	1.81113	0.18834	2.0626	0.21377
1.78784	0.18995	1.82824	0.18843	2.06201	0.21391
1.80906	0.18999	1.82949	0.18856	2.06346	0.214
1.7925	0.19008	1.81801	0.18865	2.06148	0.21405
1.79924	0.1903	1.8352	0.18874	2.06411	0.21418
1.81791	0.19039	1.83171	0.18892	2.06521	0.21428
1.82111	0.19052	1.8214	0.18901	2.06902	0.21441
1.80431	0.1906	1.82562	0.18919	2.06712	0.21446
1.82101	0.19069	1.82439	0.18924	2.06766	0.21464
1.82258	0.19087	1.84738	0.18933	2.07042	0.21473
1.81109	0.19096	1.84287	0.18951	2.07187	0.21478
1.82654	0.19109	1.82501	0.18955	2.07437	0.21492
1.82081	0.19118	1.82634	0.18973	2.07731	0.21501
1.82533	0.19126	1.84724	0.18987	2.08057	0.21515
1.82576	0.19148	1.8315	0.18996	2.08265	0.21519
1.81789	0.19153	1.83704	0.19009	2.0831	0.21528
1.81572	0.1917	1.85531	0.19018	2.08637	0.21547
1.83685	0.19179	1.85429	0.19036	2.08785	0.21551
1.82361	0.19188	1.83578	0.19045	2.09311	0.21565
1.82808	0.19205	1.84197	0.1905	2.09306	0.21574
1.84797	0.19214	1.8528	0.19072	2.09264	0.21579
1.84911	0.19232	1.84344	0.19081	2.09465	0.21593
1.8353	0.19236	1.86512	0.19095	2.09469	0.21602
1.85086	0.19245	1.85526	0.19104	2.09949	0.21616
1.85246	0.19262	1.86866	0.19113	2.10104	0.2162
1.84286	0.19267	1.8748	0.19126	2.10283	0.21629
1.84079	0.19289	1.86041	0.19135	2.10479	0.21643
1.84972	0.19297	1.86104	0.19153	2.10684	0.21648
1.84193	0.1931	1.87573	0.19162	2.1087	0.21666
1.85587	0.19319	1.86605	0.19171	2.1101	0.21671
1.83972	0.19328	1.8769	0.19189	2.11254	0.21675
1.84301	0.19341	1.87217	0.19194	2.11632	0.21694
1.86099	0.1935	1.8719	0.19212	2.11441	0.21698
1.84575	0.19359	1.89118	0.19221	2.11729	0.21712
1.8507	0.19381	1.89252	0.19234	2.11755	0.21721
1.86731	0.19385	1.87921	0.19243	2.12005	0.21726
1.87581	0.19403	1.89825	0.19252	2.12116	0.21739
1.86214	0.19411	1.88465	0.19266	2.12252	0.21749
1.87165	0.19425	1.90271	0.19275	2.12555	0.21762
1.86884	0.19433	1.88711	0.19284	2.12499	0.21767
1.87626	0.19442	1.88525	0.19302	2.12623	0.21776
1.88136	0.1946	1.90371	0.19306	2.12959	0.2179
1.85994	0.19468	1.90744	0.19324	2.13129	0.21799
1.88227	0.19477	1.89625	0.19333	2.13446	0.21813
1.88424	0.1949	1.91787	0.19347	2.13744	0.21817
1.87076	0.19499	1.89743	0.19356	2.13931	0.21831
1.87216	0.19517	1.91943	0.19365	2.14304	0.2184
1.89294	0.19525	1.91668	0.19378	2.14302	0.21845
1.88288	0.19539	1.90479	0.19387	2.14995	0.21863
1.89184	0.19547	1.9208	0.19401	2.15236	0.21868
1.88506	0.19556	1.90318	0.1941	2.15781	0.21872
1.88271	0.19569	1.92203	0.19419	2.16162	0.21886
1.90152	0.19578	1.92683	0.19432	2.16307	0.21891
1.90665	0.19596	1.90865	0.19441	2.16746	0.21905
1.89324	0.19604	1.91935	0.19459	2.17223	0.21914
1.90345	0.19613	1.9201	0.19464	2.17504	0.21923
1.9057	0.19631	1.93102	0.19473	2.17678	0.21932
1.90953	0.19635	1.92963	0.19491	2.17564	0.21937
1.91437	0.19653	1.91087	0.19495	2.17941	0.2195
1.89871	0.19661	1.91803	0.19513	2.18057	0.21955
1.91705	0.19666	1.92628	0.19522	2.18262	0.21969
1.92155	0.19683	1.92339	0.19531	2.18325	0.21973
1.90764	0.19692	1.9371	0.19545	2.18394	0.21978
1.92562	0.19705	1.92143	0.19554	2.18387	0.21992
1.90539	0.19714	1.92548	0.19567	2.18508	0.22001
1.92975	0.19723	1.9462	0.19581	2.18662	0.2201
1.92611	0.1974	1.92837	0.19585	2.18794	0.22019
1.90992	0.19745	1.93197	0.19603	2.18738	0.22024
1.91484	0.19762	1.93985	0.19612	2.19115	0.22038
1.93045	0.19771	1.92992	0.19626	2.19297	0.22042
1.92033	0.1978	1.95059	0.19635	2.19646	0.22056
1.93669	0.19793	1.93308	0.19644	2.19724	0.22061
1.9225	0.19802	1.93917	0.19657	2.2014	0.22065
1.94152	0.19811	1.9589	0.19666	2.20327	0.22079
1.94047	0.19824	1.95559	0.19684	2.20318	0.22088
1.92575	0.19832	1.96061	0.19689	2.20399	0.22097
1.93199	0.1985	1.94251	0.19698	2.20154	0.22106
1.93055	0.19854	1.94678	0.19716	2.20259	0.22111
1.93707	0.19872	1.96346	0.19725	2.20274	0.22125
1.9547	0.19881	1.96287	0.19738	2.2035	0.22129
1.9395	0.19885	1.94945	0.19747	2.2068	0.22143
1.94695	0.19903	1.97262	0.19761	2.20734	0.22148
1.95176	0.19907	1.95298	0.1977	2.20791	0.22157
1.94818	0.19925	1.97338	0.19779	2.21329	0.22171
1.96444	0.19929	1.9765	0.19792	2.21345	0.22175
1.9527	0.19938	1.95702	0.19801	2.21789	0.22189
1.96451	0.19951	1.9635	0.19819	2.21963	0.22194
1.95981	0.1996	1.96214	0.19824	2.22437	0.22207
1.95621	0.19977	1.98278	0.19833	2.22422	0.22212
1.97448	0.19986	1.9873	0.19851	2.22817	0.22221
1.95452	0.1999	1.97431	0.19855	2.22991	0.2223
1.96078	0.20008	1.98011	0.19873	2.23102	0.22239
1.96373	0.20012	1.98399	0.19878	2.23089	0.22244
1.95941	0.20025	1.98145	0.19896	2.23357	0.22258
1.97931	0.20034	1.99825	0.199	2.23339	0.22262
1.97179	0.20047	1.9873	0.19909	2.23591	0.22276
1.97469	0.20056	1.99961	0.19923	2.23597	0.22281
1.97108	0.20065	1.99623	0.19932	2.23818	0.22294
1.96766	0.20078	2.00864	0.19941	2.23814	0.22299
1.98403	0.20087	2.0091	0.19954	2.23996	0.22308
1.98797	0.20104	1.9946	0.19963	2.24329	0.22317
1.97238	0.20113	2.00225	0.19977	2.2453	0.22327
1.97648	0.20117	2.0014	0.19986	2.24655	0.22331
1.97911	0.20135	1.99424	0.19999	2.2492	0.22345
1.99629	0.20144	2.01622	0.20008	2.25386	0.22349
1.99677	0.20157	1.99571	0.20017	2.25517	0.22363
1.98572	0.20166	2.01541	0.20031	2.25801	0.22368
2.00221	0.20179	1.99819	0.2004	2.25975	0.22382
1.9859	0.20183	2.00048	0.20058	2.26242	0.22386
2.00665	0.20192	2.02001	0.20062	2.2626	0.22395
2.00421	0.2021	2.00641	0.20071	2.2647	0.22405
2.00055	0.20214	2.01377	0.20085	2.26562	0.22409
1.99537	0.20223	2.00996	0.20094	2.26753	0.22418
1.99252	0.2024	2.00175	0.20107	2.26722	0.22428
2.01224	0.20249	2.02152	0.20116	2.26887	0.22437
2.01025	0.20262	2.00468	0.20125	2.27154	0.2245
1.99942	0.20271	2.0138	0.20143	2.27187	0.2245
2.02085	0.20284	2.01329	0.20147	2.27703	0.22464
2.00459	0.20293	2.00912	0.20166	2.27861	0.22473
2.02516	0.20297	2.02349	0.20175	2.27903	0.22478
2.02497	0.20315	2.00852	0.20179	2.28006	0.22492
2.02024	0.20319	2.00963	0.20197	2.28078	0.22496
2.01682	0.20328	2.02869	0.20206	2.28271	0.22505
2.01457	0.20346	2.03047	0.20224	2.28369	0.22515
2.02972	0.2035	2.03036	0.20228	2.28298	0.22519
2.02712	0.20367	2.02159	0.20237	2.28131	0.22533
2.02697	0.20372	2.02464	0.20251	2.28046	0.22538
2.03959	0.20385	2.04543	0.2026	2.28336	0.22551
2.02329	0.20394	2.03548	0.20273	2.28327	0.22561
2.03946	0.20407	2.04005	0.20282	2.28419	0.22561
2.0238	0.20416	2.0495	0.203	2.28479	0.22579
2.04056	0.2042	2.03117	0.20305	2.28577	0.22583
2.04487	0.20438	2.04911	0.20314	2.28711	0.22597
2.0468	0.20442	2.0473	0.20336	2.28546	0.22602
2.04997	0.2046	2.05803	0.20354	2.28675	0.22611
2.03284	0.20464	2.04484	0.20359	2.29106	0.2262
2.04878	0.20477	2.04897	0.20377	2.29441	0.22629
2.03671	0.20486	2.05794	0.20381	2.3	0.22643
2.03967	0.20499	2.05455	0.20399	2.30336	0.22648
2.05139	0.20503	2.07478	0.20408	2.30404	0.22652
2.04557	0.20521	2.0765	0.20422	2.30769	0.22666
2.06311	0.2053	2.06828	0.20426	2.30823	0.22675
2.05591	0.20539	2.07962	0.20444	2.30894	0.2268
2.05883	0.20547	2.0632	0.20449	2.3101	0.22694
2.05092	0.20556	2.07381	0.20467	2.31129	0.22698
2.0519	0.20569	2.07187	0.20471	2.31292	0.22712
2.0601	0.20574	2.0665	0.20485	2.31438	0.22721
2.05288	0.20591	2.08298	0.20494	2.32003	0.2273
2.05719	0.20604	2.07716	0.20503	2.3226	0.22739
2.06129	0.20609	2.09029	0.20516	2.32252	0.22744
2.05698	0.20622	2.07484	0.20521	2.32507	0.22758
2.07388	0.20631	2.0791	0.20539	2.32618	0.22762
2.06162	0.20639	2.08375	0.20543	2.32866	0.22767
2.07854	0.20653	2.07687	0.20557	2.33203	0.22781
2.06443	0.20657	2.09911	0.20566	2.33628	0.22785
2.0708	0.20675	2.08265	0.20579	2.34001	0.22799
2.07836	0.20679	2.09897	0.20588	2.34378	0.22808
2.0751	0.20692	2.10466	0.20602	2.34608	0.22817
2.09113	0.20701	2.08583	0.20611	2.34708	0.22822
2.08652	0.20714	2.10924	0.20624	2.34721	0.22831
2.09956	0.20723	2.09243	0.20629	2.35136	0.2284
2.09425	0.20732	2.10392	0.20642	2.35308	0.22845
2.10063	0.2074	2.09697	0.20651	2.35243	0.22854
2.10544	0.20753	2.11447	0.2066	2.35576	0.22863
2.09751	0.20758	2.1175	0.20674	2.35504	0.22872
2.09529	0.20767	2.11304	0.20678	2.35633	0.22882
2.09244	0.2078	2.12508	0.20696	2.35671	0.22886
2.10128	0.20784	2.11367	0.20705	2.36116	0.229
2.099	0.20802	2.11777	0.20714	2.36304	0.22905
2.11474	0.20806	2.10941	0.20723	2.36661	0.22914
2.1037	0.20819	2.11233	0.20737	2.37213	0.22923
2.12044	0.20828	2.11878	0.20741	2.37501	0.22928
2.11752	0.20841	2.11222	0.20759	2.37958	0.22941
2.12026	0.20846	2.13122	0.20768	2.37982	0.22946
2.12328	0.20859	2.12038	0.20777	2.38087	0.2295
2.10304	0.20868	2.12954	0.20786	2.38303	0.22964
2.12542	0.20881	2.13726	0.208	2.38423	0.22969
2.10915	0.20885	2.12424	0.20809	2.39115	0.22978
2.12858	0.20894	2.1399	0.20822	2.39251	0.22987
2.1123	0.20907	2.12721	0.20831	2.39515	0.22987
2.13152	0.20911	2.14879	0.20836	2.40005	0.23001
2.13487	0.20929	2.14492	0.20854	2.39973	0.23005
2.12712	0.20938	2.14429	0.20858	2.40228	0.23015
2.13855	0.20946	2.14967	0.20872	2.404	0.23019
2.1208	0.20955	2.13726	0.20881	2.40671	0.23028
2.12896	0.2096	2.14897	0.20894	2.40799	0.23038
2.12668	0.20973	2.13854	0.20899	2.41069	0.23042
2.14528	0.20982	2.14744	0.20917	2.41349	0.23051
2.1356	0.20995	2.15271	0.20921	2.41214	0.23061
2.13397	0.21008	2.14411	0.20935	2.41321	0.23061
2.1428	0.21012	2.16197	0.20944	2.41666	0.23074
2.15502	0.21021	2.1572	0.20948	2.41836	0.23079
2.14876	0.21034	2.16581	0.20962	2.42269	0.23088
2.15034	0.21039	2.14968	0.20971	2.4221	0.23093
2.15684	0.21052	2.16316	0.20984	2.42288	0.23097
2.15018	0.21056	2.15288	0.20989	2.42427	0.23106
2.16262	0.21074	2.16206	0.21007	2.4262	0.23116
2.14452	0.21078	2.1651	0.21011	2.42828	0.23125
2.16444	0.21091	2.15834	0.21025	2.42902	0.23129
2.15058	0.21096	2.1705	0.21034	2.43158	0.23138
2.1714	0.21109	2.15996	0.21047	2.43359	0.23143
2.15337	0.21113	2.17543	0.21052	2.43541	0.23152
2.15919	0.21131	2.17823	0.2107	2.43731	0.23161
2.1613	0.21135	2.17487	0.21074	2.43718	0.23166
2.15544	0.21148	2.18642	0.21088	2.43825	0.23175
2.16281	0.21153	2.17466	0.21097	2.43761	0.2318
2.15916	0.21166	2.18055	0.21101	2.43722	0.23184
2.17385	0.21175	2.17585	0.21119	2.43562	0.23198
2.15983	0.21188	2.19549	0.21124	2.43577	0.23203
2.1819	0.21192	2.18167	0.21137	2.43954	0.23212
2.1697	0.21205	2.19683	0.21146	2.44022	0.23217
2.18157	0.21214	2.19215	0.2116	2.44037	0.23221
2.17035	0.21223	2.18898	0.21164	2.4401	0.23235
2.17804	0.21232	2.19614	0.21182	2.4395	0.23239
2.18816	0.21245	2.17897	0.21187	2.44173	0.23249
2.17024	0.21253	2.19023	0.212	2.44082	0.23253
2.1903	0.21262	2.18108	0.21209	2.44206	0.23262
2.17359	0.21271	2.1828	0.21223	2.44516	0.23272
2.19322	0.2128	2.19192	0.21227	2.4451	0.23276
2.17923	0.21293	2.18524	0.21241	2.44566	0.2329
2.1949	0.21297	2.20687	0.2125	2.44675	0.23294
2.18899	0.2131	2.19715	0.21263	2.44954	0.23304
2.19897	0.21315	2.20292	0.21272	2.45315	0.23313
2.19554	0.21332	2.19183	0.21277	2.45555	0.23317
2.19732	0.21337	2.19501	0.21295	2.45739	0.23322
2.20887	0.2135	2.21599	0.21304	2.45823	0.23331
2.19405	0.21359	2.19819	0.21313	2.46009	0.2334
2.2064	0.21372	2.21773	0.21322	2.45921	0.23349
2.19126	0.21376	2.21209	0.21335	2.45861	0.23359
2.20497	0.21389	2.21797	0.21344	2.45772	0.23363
2.19291	0.21398	2.22549	0.21358	2.45935	0.23372
2.20735	0.21407	2.21182	0.21367	2.46187	0.23382
2.20225	0.21416	2.23073	0.21376	2.46339	0.23391
2.21765	0.21425	2.21768	0.21385	2.46559	0.23395
2.20869	0.21433	2.22968	0.21394	2.46604	0.234
2.22115	0.21442	2.22222	0.21407	2.46508	0.23414
2.22505	0.21455	2.2347	0.21412	2.46512	0.23418
2.21736	0.2146	2.23169	0.2143	2.46725	0.23432
2.2251	0.21473	2.23304	0.21434	2.46823	0.23437
2.21094	0.21482	2.24578	0.21448	2.46767	0.23441
2.22926	0.21495	2.2333	0.21457	2.47001	0.23455
2.21569	0.21499	2.24828	0.2147	2.47163	0.2346
2.2246	0.21512	2.23428	0.21475	2.47703	0.23473
2.2156	0.21521	2.24815	0.21484	2.47699	0.23478
2.22151	0.21534	2.25419	0.21506	2.47994	0.23483
2.22986	0.21539	2.24873	0.21515	2.47801	0.23496
2.22757	0.21552	2.26385	0.21524	2.47757	0.23501
2.23448	0.21556	2.25814	0.21538	2.4769	0.23515
2.22786	0.21574	2.25259	0.21542	2.4765	0.23519
2.24302	0.21578	2.26017	0.21556	2.46066	0.23533
2.23282	0.21591	2.24469	0.21565	2.4589	0.23538
2.25156	0.21596	2.26229	0.21578	2.46001	0.23547
2.24012	0.21609	2.24478	0.21583	2.46301	0.23556
2.25064	0.21618	2.25259	0.216	2.46687	0.23565
2.23586	0.21622	2.25282	0.21605	2.46791	0.23579
2.24782	0.21635	2.25526	0.21618	2.46731	0.23583
2.23662	0.21644	2.27596	0.21628	2.4678	0.23593
2.23921	0.21657	2.26037	0.21637	2.47409	0.23606
2.24719	0.21661	2.27611	0.21646	2.47724	0.23611
2.24355	0.21675	2.27124	0.21659	2.4822	0.23625
2.25733	0.21683	2.27955	0.21664	2.48627	0.23634
2.24529	0.21692	2.28271	0.21681	2.48738	0.23638
2.2627	0.21701	2.27745	0.21686	2.49164	0.23652
2.25729	0.21714	2.26704	0.2169	2.49052	0.23661
2.26848	0.21723	2.27101	0.21708	2.49673	0.23671
2.2643	0.21732	2.27466	0.21713	2.49815	0.2368
2.26884	0.2174	2.2721	0.21726	2.50228	0.23684
2.25857	0.21749	2.28845	0.21735	2.5073	0.23698
2.27012	0.21758	2.28104	0.21749	2.50718	0.23703
2.26112	0.21767	2.29735	0.21753	2.51087	0.23712
2.26545	0.2178	2.28961	0.21767	2.51345	0.23726
2.27057	0.21784	2.29617	0.21776	2.51475	0.2373
2.26546	0.21797	2.30252	0.21789	2.51889	0.23739
2.28669	0.21806	2.29643	0.21794	2.52008	0.23749
2.27297	0.21815	2.28675	0.21803	2.51981	0.23753
2.28885	0.21824	2.29307	0.21816	2.52103	0.23767
2.2828	0.21837	2.29753	0.21821	2.52032	0.23772
2.29254	0.21841	2.29079	0.21834	2.52251	0.23785
2.28577	0.21854	2.30781	0.21848	2.52382	0.2379
2.2964	0.21863	2.2926	0.21852	2.52757	0.23794
2.28836	0.21872	2.31423	0.21861	2.52567	0.23808
2.2975	0.21881	2.29931	0.21875	2.52697	0.23817
2.3034	0.21894	2.31595	0.21879	2.52679	0.23827
2.29881	0.21898	2.31274	0.21897	2.52862	0.23831
2.31246	0.21911	2.31265	0.21902	2.5322	0.2384
2.30414	0.21916	2.32163	0.21915	2.5346	0.23849
2.31528	0.21929	2.31545	0.2192	2.53776	0.23859
2.30827	0.21933	2.32712	0.21938	2.53837	0.23872
2.30577	0.21942	2.30843	0.21942	2.54088	0.23877
2.30282	0.21955	2.32917	0.21956	2.54013	0.23882
2.30884	0.2196	2.31215	0.2196	2.54554	0.23895
2.30552	0.21973	2.32855	0.21974	2.54643	0.239
2.31273	0.21982	2.31782	0.21983	2.55349	0.23914
2.30729	0.2199	2.33	0.21992	2.55484	0.23918
2.3173	0.21995	2.32032	0.22001	2.55585	0.23923
2.31312	0.22008	2.32213	0.22014	2.55032	0.23937
2.32229	0.22012	2.33648	0.22023	2.54773	0.23941
2.31591	0.22025	2.32599	0.22032	2.54874	0.23955
2.33387	0.22034	2.34391	0.22041	2.54786	0.2396
2.3205	0.22043	2.32801	0.2205	2.54967	0.23973
2.33776	0.22052	2.34889	0.22059	2.55169	0.23978
2.32249	0.22065	2.3388	0.22073	2.5534	0.23987
2.33903	0.22069	2.3511	0.22077	2.5579	0.23996
2.32304	0.22082	2.34797	0.22095	2.55957	0.24005
2.34179	0.22087	2.34325	0.221	2.56321	0.24015
2.32933	0.221	2.35107	0.22113	2.56232	0.24024
2.35046	0.22104	2.3465	0.22118	2.56194	0.24028
2.33797	0.22118	2.34296	0.22127	2.56368	0.24042
2.34834	0.22122	2.33925	0.2214	2.56399	0.24047
2.33517	0.22135	2.36369	0.22154	2.56738	0.24061
2.34638	0.22144	2.34424	0.22163	2.56711	0.2407
2.33823	0.22153	2.36247	0.22167	2.57186	0.24074
2.34895	0.22161	2.35205	0.22181	2.572	0.24088
2.33399	0.22166	2.36392	0.2219	2.57487	0.24093
2.35082	0.22179	2.35339	0.22199	2.57595	0.24102
2.33378	0.22183	2.36173	0.22208	2.58051	0.24111
2.34636	0.22201	2.36554	0.22221	2.58169	0.2412
2.34723	0.22205	2.34819	0.2223	2.58187	0.24129
2.34411	0.22218	2.37065	0.22244	2.58078	0.24138
2.3483	0.22223	2.35466	0.22248	2.58397	0.24143
2.34652	0.22236	2.36811	0.22262	2.58596	0.24157
2.36544	0.22245	2.35716	0.22271	2.58591	0.24161
2.353	0.22254	2.3771	0.22275	2.58935	0.24175
2.36909	0.22262	2.37175	0.22293	2.59122	0.2418
2.35284	0.22271	2.38009	0.22298	2.59189	0.24189
2.36917	0.2228	2.38776	0.22311	2.5931	0.24203
2.36377	0.22293	2.37189	0.2232	2.59408	0.24207
2.37719	0.22297	2.38767	0.22329	2.5953	0.24221
2.36486	0.2231	2.37578	0.22338	2.59693	0.24226
2.37592	0.22315	2.39248	0.22352	2.59782	0.2423
2.36439	0.22324	2.37673	0.22356	2.59969	0.24244
[truncated: 10,594 more rows]

## Sheet: pH = 5，Stress-Strain 
Stress	SP5-10(5)	Stress	SP10-15(5)	Stress	SP15-20(5)
0	0	0	0	0	0
0.10068	0.01292	0.10131	0.02848	0.10033	0.02189
0.10078	0.01297	0.10076	0.02848	0.10028	0.02189
0.10149	0.01297	0.10094	0.02848	0.10054	0.02193
0.10094	0.01297	0.10135	0.02848	0.09963	0.02193
0.10103	0.01297	0.10256	0.02853	0.09977	0.02193
0.10164	0.01297	0.10242	0.02853	0.09926	0.02193
0.1009	0.01301	0.10106	0.02853	0.09871	0.02198
0.10127	0.01301	0.10064	0.02853	0.09903	0.02198
0.1021	0.01301	0.10018	0.02853	0.09976	0.02198
0.0998	0.01301	0.09917	0.02857	0.0987	0.02198
0.10085	0.01301	0.09985	0.02857	0.09982	0.02198
0.10018	0.01305	0.10053	0.02857	0.10023	0.02198
0.10025	0.01305	0.10031	0.02857	0.09894	0.02202
0.1019	0.01305	0.09986	0.02857	0.0988	0.02202
0.10076	0.01305	0.10127	0.02861	0.09889	0.02202
0.10152	0.0131	0.10085	0.02861	0.09917	0.02202
0.1008	0.0131	0.10122	0.02861	0.0999	0.02202
0.10181	0.0131	0.10182	0.02861	0.09866	0.02207
0.10374	0.0131	0.1026	0.02861	0.09972	0.02207
0.10281	0.0131	0.10283	0.02866	0.09926	0.02207
0.11005	0.01314	0.10275	0.02866	0.10134	0.02207
0.10283	0.01314	0.10388	0.02866	0.10117	0.02212
0.10385	0.01314	0.10396	0.02866	0.09996	0.02212
0.10287	0.01314	0.10383	0.0287	0.10101	0.02212
0.10355	0.01314	0.10265	0.0287	0.10168	0.02212
0.10255	0.01319	0.1041	0.0287	0.10233	0.02212
0.10301	0.01319	0.10346	0.0287	0.10127	0.02216
0.10247	0.01319	0.10261	0.0287	0.10201	0.02216
0.10269	0.01319	0.09432	0.02875	0.10166	0.02216
0.10224	0.01319	0.10374	0.02875	0.10237	0.02216
0.09282	0.01323	0.10302	0.02875	0.10178	0.02216
0.10261	0.01323	0.10306	0.02875	0.10279	0.02221
0.10309	0.01323	0.1022	0.02875	0.10269	0.02221
0.10187	0.01323	0.10385	0.02879	0.10325	0.02221
0.10159	0.01323	0.10351	0.02879	0.10242	0.02221
0.10323	0.01327	0.10371	0.02879	0.10417	0.02221
0.10311	0.01327	0.10387	0.02879	0.10324	0.02225
0.10261	0.01327	0.10433	0.02879	0.10413	0.02225
0.10346	0.01327	0.10761	0.02884	0.10494	0.02225
0.10267	0.01327	0.10407	0.02884	0.10468	0.02225
0.1027	0.01332	0.1047	0.02884	0.10503	0.02225
0.10374	0.01332	0.10399	0.02884	0.10608	0.0223
0.10498	0.01332	0.10429	0.02888	0.10567	0.0223
0.10475	0.01332	0.10457	0.02888	0.10558	0.0223
0.10507	0.01336	0.10457	0.02888	0.1038	0.0223
0.10474	0.01336	0.10274	0.02888	0.10613	0.0223
0.10568	0.01336	0.10428	0.02888	0.10539	0.02234
0.10411	0.01336	0.09756	0.02892	0.10581	0.02234
0.1043	0.01336	0.10497	0.02892	0.1053	0.02234
0.09589	0.0134	0.1053	0.02892	0.1048	0.02234
0.10438	0.0134	0.10494	0.02892	0.10408	0.02239
0.10385	0.0134	0.10451	0.02892	0.10434	0.02239
0.10401	0.0134	0.10511	0.02897	0.10535	0.02239
0.10298	0.0134	0.1046	0.02897	0.10567	0.02239
0.10321	0.01345	0.10598	0.02897	0.1052	0.02239
0.10448	0.01345	0.1052	0.02897	0.10631	0.02244
0.1032	0.01345	0.1053	0.02897	0.10452	0.02244
0.10401	0.01345	0.11555	0.02901	0.10549	0.02244
0.1105	0.01349	0.10583	0.02901	0.10461	0.02244
0.10539	0.01349	0.1057	0.02901	0.10466	0.02244
0.10484	0.01349	0.1048	0.02901	0.10613	0.02248
0.10503	0.01349	0.10521	0.02906	0.10563	0.02248
0.1047	0.01349	0.10415	0.02906	0.10545	0.02248
0.10428	0.01354	0.10577	0.02906	0.1054	0.02248
0.10437	0.01354	0.10576	0.02906	0.10568	0.02253
0.10415	0.01354	0.10626	0.02906	0.10595	0.02253
0.10337	0.01354	0.09624	0.0291	0.10471	0.02253
0.10425	0.01354	0.10182	0.0291	0.10599	0.02253
0.0984	0.01358	0.10378	0.0291	0.10581	0.02253
0.10306	0.01358	0.10584	0.0291	0.10571	0.02253
0.10275	0.01358	0.10419	0.0291	0.10512	0.02257
0.10399	0.01358	0.1054	0.0291	0.10674	0.02257
0.10302	0.01358	0.10411	0.02914	0.10589	0.02257
0.10429	0.01362	0.10376	0.02914	0.10544	0.02257
0.1032	0.01362	0.10606	0.02914	0.10566	0.02257
0.10419	0.01362	0.10512	0.02914	0.10573	0.02262
0.10318	0.01362	0.11476	0.02919	0.10539	0.02262
0.10369	0.01362	0.10553	0.02919	0.10724	0.02262
0.10795	0.01367	0.10667	0.02919	0.10558	0.02262
0.10553	0.01367	0.10621	0.02919	0.10673	0.02267
0.10611	0.01367	0.10648	0.02919	0.10604	0.02267
0.10558	0.01367	0.10612	0.02923	0.10604	0.02267
0.10452	0.01367	0.1059	0.02923	0.10562	0.02267
0.10662	0.01371	0.10576	0.02923	0.10631	0.02267
0.10583	0.01371	0.1048	0.02923	0.10682	0.02271
0.1057	0.01371	0.10698	0.02923	0.10781	0.02271
0.10451	0.01371	0.10439	0.02928	0.10553	0.02271
0.10545	0.01371	0.10479	0.02928	0.10708	0.02271
0.1047	0.01376	0.10451	0.02928	0.1065	0.02276
0.10516	0.01376	0.10469	0.02928	0.1071	0.02276
0.10502	0.01376	0.10551	0.02928	0.10646	0.02276
0.1048	0.01376	0.10485	0.02932	0.10715	0.02276
0.10434	0.01376	0.10437	0.02932	0.10763	0.02276
0.10542	0.0138	0.10507	0.02932	0.10746	0.02276
0.10429	0.0138	0.10462	0.02932	0.10738	0.0228
0.10531	0.0138	0.11183	0.02936	0.10754	0.0228
0.10558	0.0138	0.10712	0.02936	0.10787	0.0228
0.11435	0.01384	0.10693	0.02936	0.10851	0.0228
0.10731	0.01384	0.10667	0.02936	0.10727	0.0228
0.10736	0.01384	0.10598	0.02936	0.10991	0.02285
0.10698	0.01384	0.10657	0.02941	0.1101	0.02285
0.10693	0.01384	0.10593	0.02941	0.10997	0.02285
0.10479	0.01389	0.10584	0.02941	0.11006	0.02285
0.10563	0.01389	0.1062	0.02941	0.11065	0.02285
0.1063	0.01389	0.10635	0.02941	0.11079	0.0229
0.10759	0.01389	0.09716	0.02945	0.11092	0.0229
0.10383	0.01393	0.10525	0.02945	0.11076	0.0229
0.10447	0.01393	0.10588	0.02945	0.11134	0.0229
0.106	0.01393	0.10548	0.02945	0.11094	0.02294
0.10514	0.01393	0.10526	0.02945	0.11052	0.02294
0.10511	0.01393	0.10611	0.0295	0.11029	0.02294
0.10707	0.01393	0.10567	0.0295	0.11084	0.02294
0.10662	0.01398	0.10443	0.0295	0.11177	0.02294
0.10662	0.01398	0.10593	0.0295	0.11102	0.02299
0.10708	0.01398	0.10635	0.0295	0.11098	0.02299
0.10662	0.01398	0.11608	0.02954	0.11331	0.02299
0.10867	0.01398	0.10745	0.02954	0.11208	0.02299
0.10876	0.01402	0.10693	0.02954	0.1118	0.02299
0.108	0.01402	0.10816	0.02954	0.11236	0.02303
0.10795	0.01402	0.10676	0.02958	0.11199	0.02303
0.10876	0.01402	0.10876	0.02958	0.11341	0.02303
0.10881	0.01406	0.108	0.02958	0.11294	0.02303
0.10845	0.01406	0.10763	0.02958	0.11349	0.02303
0.10858	0.01406	0.10873	0.02958	0.11419	0.02308
0.10887	0.01406	0.10685	0.02958	0.11381	0.02308
0.10908	0.01406	0.10685	0.02963	0.11387	0.02308
0.10145	0.01411	0.10847	0.02963	0.11336	0.02308
0.10667	0.01411	0.10649	0.02963	0.11349	0.02308
0.10784	0.01411	0.10677	0.02963	0.11327	0.02313
0.10761	0.01411	0.10789	0.02963	0.11369	0.02313
0.10698	0.01411	0.1069	0.02967	0.11294	0.02313
0.10831	0.01415	0.10851	0.02967	0.11349	0.02313
0.1069	0.01415	0.108	0.02967	0.11401	0.02313
0.1074	0.01415	0.10795	0.02967	0.11455	0.02317
0.10798	0.01415	0.10814	0.02967	0.11532	0.02317
0.10896	0.01415	0.1083	0.02972	0.11381	0.02317
0.1199	0.01419	0.10842	0.02972	0.11404	0.02317
0.10782	0.01419	0.10662	0.02972	0.11369	0.02317
0.10863	0.01419	0.10896	0.02972	0.11522	0.02322
0.10955	0.01419	0.10842	0.02976	0.11488	0.02322
0.11025	0.01419	0.10621	0.02976	0.11513	0.02322
0.1074	0.01424	0.10736	0.02976	0.11442	0.02322
0.10917	0.01424	0.10741	0.02976	0.11485	0.02326
0.10885	0.01424	0.10681	0.02976	0.11432	0.02326
0.10947	0.01424	0.09656	0.0298	0.11431	0.02326
0.1095	0.01424	0.10625	0.0298	0.11422	0.02326
0.10768	0.01428	0.10644	0.0298	0.11432	0.02326
0.10859	0.01428	0.10616	0.0298	0.11501	0.02331
0.10759	0.01428	0.10549	0.0298	0.11487	0.02331
0.108	0.01428	0.10508	0.02985	0.11417	0.02331
0.10882	0.01428	0.10498	0.02985	0.11327	0.02331
0.10901	0.01433	0.10537	0.02985	0.11441	0.02331
0.10764	0.01433	0.1053	0.02985	0.11363	0.02335
0.10886	0.01433	0.10563	0.02985	0.11501	0.02335
0.10768	0.01433	0.11511	0.02989	0.1158	0.02335
0.11841	0.01437	0.10373	0.02989	0.11423	0.02335
0.10909	0.01437	0.10484	0.02989	0.11476	0.02335
0.10959	0.01437	0.10507	0.02989	0.11478	0.0234
0.10918	0.01437	0.10531	0.02989	0.11524	0.0234
0.1095	0.01437	0.10607	0.02994	0.11534	0.0234
0.10882	0.01437	0.10503	0.02994	0.11555	0.0234
0.10983	0.01441	0.10579	0.02994	0.11441	0.02345
0.10937	0.01441	0.10489	0.02994	0.11459	0.02345
0.10886	0.01441	0.09354	0.02998	0.11464	0.02345
0.1095	0.01441	0.10382	0.02998	0.11628	0.02345
0.10306	0.01446	0.1047	0.02998	0.11601	0.02345
0.10873	0.01446	0.10479	0.02998	0.11395	0.02349
0.10877	0.01446	0.10388	0.02998	0.11478	0.02349
0.10955	0.01446	0.10443	0.03002	0.11492	0.02349
0.10873	0.01446	0.10521	0.03002	0.11456	0.02349
0.10885	0.0145	0.10479	0.03002	0.11531	0.02349
0.10867	0.0145	0.1054	0.03002	0.11394	0.02354
0.11011	0.0145	0.10512	0.03002	0.11451	0.02354
0.10904	0.0145	0.10576	0.03007	0.11331	0.02354
0.10978	0.0145	0.10652	0.03007	0.11354	0.02354
0.11362	0.01455	0.10576	0.03007	0.11536	0.02358
0.11115	0.01455	0.10593	0.03007	0.11381	0.02358
0.11066	0.01455	0.10471	0.03007	0.11324	0.02358
0.11247	0.01455	0.10494	0.03011	0.11445	0.02358
0.1111	0.01459	0.1047	0.03011	0.11377	0.02358
0.11151	0.01459	0.10528	0.03011	0.11473	0.02358
0.11206	0.01459	0.10489	0.03011	0.11312	0.02363
0.11151	0.01459	0.10402	0.03011	0.11377	0.02363
0.11164	0.01459	0.10443	0.03016	0.11404	0.02363
0.10182	0.01463	0.10434	0.03016	0.11327	0.02363
0.11179	0.01463	0.10425	0.03016	0.11231	0.02368
0.11201	0.01463	0.10499	0.03016	0.11308	0.02368
0.11234	0.01463	0.10508	0.03016	0.11239	0.02368
0.11133	0.01463	0.10415	0.0302	0.11332	0.02368
0.11211	0.01468	0.10401	0.0302	0.11239	0.02368
0.11215	0.01468	0.10537	0.0302	0.11257	0.02372
0.11216	0.01468	0.10499	0.0302	0.11243	0.02372
0.11303	0.01468	0.10489	0.0302	0.11199	0.02372
0.11408	0.01468	0.10772	0.03025	0.11282	0.02372
0.1241	0.01472	0.106	0.03025	0.11382	0.02377
0.11463	0.01472	0.10721	0.03025	0.11299	0.02377
0.11408	0.01472	0.10708	0.03025	0.11349	0.02377
0.11418	0.01472	0.10686	0.03029	0.11413	0.02377
0.11516	0.01472	0.10671	0.03029	0.1125	0.02377
0.11471	0.01476	0.10676	0.03029	0.11354	0.02381
0.11395	0.01476	0.10736	0.03029	0.11446	0.02381
0.11518	0.01476	0.10616	0.03029	0.11468	0.02381
0.1138	0.01476	0.09735	0.03033	0.11433	0.02381
0.10576	0.01481	0.10438	0.03033	0.11313	0.02381
0.1143	0.01481	0.10461	0.03033	0.11405	0.02386
0.11499	0.01481	0.10567	0.03033	0.11524	0.02386
0.11413	0.01481	0.10646	0.03033	0.11468	0.02386
0.11502	0.01481	0.10545	0.03038	0.1155	0.02386
0.11261	0.01485	0.1062	0.03038	0.11381	0.02386
0.11431	0.01485	0.10658	0.03038	0.11387	0.02391
0.11444	0.01485	0.10694	0.03038	0.11369	0.02391
0.11562	0.01485	0.10558	0.03038	0.11409	0.02391
0.11499	0.01485	0.10845	0.03042	0.11566	0.02391
0.12433	0.0149	0.10753	0.03042	0.11596	0.02395
0.11542	0.0149	0.10676	0.03042	0.11614	0.02395
0.11564	0.0149	0.10931	0.03042	0.11571	0.02395
0.11586	0.0149	0.10835	0.03047	0.11646	0.02395
0.116	0.01494	0.108	0.03047	0.11661	0.02395
0.11564	0.01494	0.10909	0.03047	0.11619	0.024
0.11581	0.01494	0.10812	0.03047	0.11615	0.024
0.11655	0.01494	0.10876	0.03047	0.11697	0.024
0.11705	0.01494	0.10136	0.03051	0.1173	0.024
0.10851	0.01498	0.10823	0.03051	0.11702	0.024
0.11495	0.01498	0.1075	0.03051	0.1167	0.02404
0.1164	0.01498	0.10731	0.03051	0.11623	0.02404
0.1155	0.01498	0.10735	0.03051	0.11715	0.02404
0.11669	0.01498	0.10761	0.03055	0.11783	0.02404
0.1165	0.01503	0.10809	0.03055	0.11771	0.02404
0.11518	0.01503	0.10816	0.03055	0.11771	0.02409
0.11518	0.01503	0.10769	0.03055	0.11794	0.02409
0.11585	0.01503	0.10909	0.03055	0.11908	0.02409
0.11527	0.01503	0.11047	0.0306	0.11871	0.02409
0.12501	0.01507	0.11064	0.0306	0.11994	0.02409
0.11612	0.01507	0.10993	0.0306	0.11963	0.02413
0.11516	0.01507	0.11029	0.0306	0.11911	0.02413
0.11635	0.01507	0.11006	0.0306	0.11972	0.02413
0.11519	0.01512	0.11087	0.03064	0.11935	0.02413
0.11558	0.01512	0.1104	0.03064	0.12045	0.02413
0.11592	0.01512	0.10973	0.03064	0.1209	0.02418
0.11595	0.01512	0.10969	0.03064	0.11996	0.02418
0.115	0.01512	0.11002	0.03064	0.12115	0.02418
0.11613	0.01512	0.10816	0.03069	0.12045	0.02418
0.11514	0.01516	0.1081	0.03069	0.12055	0.02418
0.11471	0.01516	0.10879	0.03069	0.12055	0.02423
0.11395	0.01516	0.10908	0.03069	0.12055	0.02423
0.11366	0.01516	0.10891	0.03069	0.12032	0.02423
0.11499	0.01516	0.10847	0.03073	0.12083	0.02423
0.11418	0.0152	0.10923	0.03073	0.12293	0.02423
0.11435	0.0152	0.1096	0.03073	0.12108	0.02427
0.11399	0.0152	0.10807	0.03073	0.12154	0.02427
0.11436	0.0152	0.11138	0.03077	0.12182	0.02427
0.1266	0.01525	0.11106	0.03077	0.12196	0.02427
0.11632	0.01525	0.10996	0.03077	0.12274	0.02432
0.11603	0.01525	0.11119	0.03077	0.12145	0.02432
0.11581	0.01525	0.11091	0.03077	0.122	0.02432
0.11353	0.01529	0.10996	0.03082	0.12424	0.02432
0.11525	0.01529	0.10988	0.03082	0.12315	0.02432
0.11578	0.01529	0.11048	0.03082	0.12279	0.02436
0.11627	0.01529	0.1108	0.03082	0.1221	0.02436
0.11532	0.01529	0.11005	0.03082	0.12237	0.02436
0.11608	0.01529	0.10969	0.03086	0.12353	0.02436
0.10396	0.01533	0.1096	0.03086	0.1226	0.02436
0.11339	0.01533	0.1095	0.03086	0.12283	0.02441
0.11407	0.01533	0.10951	0.03086	0.12324	0.02441
0.11353	0.01533	0.11106	0.03086	0.12307	0.02441
0.11477	0.01533	0.11008	0.03091	0.1229	0.02441
0.11481	0.01538	0.10992	0.03091	0.12332	0.02441
0.11536	0.01538	0.10928	0.03091	0.12301	0.02446
0.11565	0.01538	0.10964	0.03091	0.12466	0.02446
0.11331	0.01538	0.11068	0.03091	0.12401	0.02446
0.11947	0.01542	0.11043	0.03095	0.12296	0.02446
0.11733	0.01542	0.11143	0.03095	0.12387	0.02446
0.11595	0.01542	0.1104	0.03095	0.12297	0.0245
0.11714	0.01542	0.11151	0.03095	0.12298	0.0245
0.11658	0.01542	0.11096	0.03099	0.12343	0.0245
0.11641	0.01547	0.10973	0.03099	0.12292	0.0245
0.11681	0.01547	0.10983	0.03099	0.12352	0.02455
0.11544	0.01547	0.10936	0.03099	0.12443	0.02455
0.1159	0.01547	0.11016	0.03099	0.12279	0.02455
0.10959	0.01551	0.10327	0.03104	0.12375	0.02455
0.11528	0.01551	0.10955	0.03104	0.12259	0.02455
0.11509	0.01551	0.10893	0.03104	0.12237	0.02459
0.11539	0.01551	0.10964	0.03104	0.12182	0.02459
0.11678	0.01551	0.11019	0.03104	0.12251	0.02459
0.11635	0.01551	0.10968	0.03108	0.12348	0.02459
0.11594	0.01555	0.11002	0.03108	0.1232	0.02459
0.1156	0.01555	0.10983	0.03108	0.12241	0.02464
0.11742	0.01555	0.11064	0.03108	0.12279	0.02464
0.11737	0.01555	0.10992	0.03108	0.12201	0.02464
0.12629	0.0156	0.11216	0.03113	0.12348	0.02464
0.11747	0.0156	0.11106	0.03113	0.12296	0.02464
0.11798	0.0156	0.11124	0.03113	0.12218	0.02468
0.1171	0.0156	0.11101	0.03113	0.12261	0.02468
0.11695	0.0156	0.1111	0.03113	0.12284	0.02468
0.11811	0.01564	0.11048	0.03117	0.12283	0.02468
0.11727	0.01564	0.11157	0.03117	0.12269	0.02473
0.11742	0.01564	0.11141	0.03117	0.12324	0.02473
0.11865	0.01564	0.11123	0.03117	0.12265	0.02473
0.11805	0.01564	0.10309	0.03121	0.12376	0.02473
0.11649	0.01569	0.11033	0.03121	0.12424	0.02473
0.1172	0.01569	0.11054	0.03121	0.12406	0.02478
0.11706	0.01569	0.1117	0.03121	0.12348	0.02478
0.11604	0.01569	0.11087	0.03121	0.12279	0.02478
0.11719	0.01573	0.11061	0.03126	0.1239	0.02478
0.11791	0.01573	0.1122	0.03126	0.12375	0.02478
0.11772	0.01573	0.11087	0.03126	0.12411	0.02482
0.11819	0.01573	0.11132	0.03126	0.1233	0.02482
0.11844	0.01573	0.11264	0.03126	0.12403	0.02482
0.12652	0.01577	0.11325	0.0313	0.12389	0.02482
0.11784	0.01577	0.11148	0.0313	0.12544	0.02482
0.11833	0.01577	0.11339	0.0313	0.12318	0.02487
0.11797	0.01577	0.11138	0.0313	0.12438	0.02487
0.11905	0.01577	0.1123	0.0313	0.12488	0.02487
0.11812	0.01582	0.11217	0.03135	0.12411	0.02487
0.11802	0.01582	0.11261	0.03135	0.12489	0.02487
0.11821	0.01582	0.11281	0.03135	0.12488	0.02491
0.11892	0.01582	0.11235	0.03135	0.12483	0.02491
0.11846	0.01582	0.102	0.03139	0.12468	0.02491
0.11809	0.01586	0.11106	0.03139	0.12359	0.02491
0.11718	0.01586	0.11134	0.03139	0.12425	0.02496
0.11766	0.01586	0.11211	0.03139	0.12494	0.02496
0.11761	0.01586	0.11179	0.03139	0.12419	0.02496
0.11741	0.01586	0.11285	0.03143	0.12474	0.02496
0.1187	0.01591	0.11325	0.03143	0.12387	0.02496
0.11821	0.01591	0.11198	0.03143	0.12484	0.02501
0.11779	0.01591	0.11138	0.03143	0.12636	0.02501
0.11809	0.01591	0.11229	0.03143	0.12606	0.02501
0.12679	0.01595	0.11588	0.03148	0.12544	0.02501
0.12042	0.01595	0.11361	0.03148	0.12433	0.02501
0.11861	0.01595	0.1143	0.03148	0.12671	0.02505
0.11934	0.01595	0.11457	0.03148	0.12484	0.02505
0.11856	0.01595	0.11334	0.03148	0.12589	0.02505
0.11915	0.01595	0.11395	0.03152	0.12563	0.02505
0.1172	0.01599	0.11421	0.03152	0.12581	0.02505
0.11732	0.01599	0.11325	0.03152	0.12645	0.0251
0.11749	0.01599	0.11422	0.03152	0.12636	0.0251
0.11883	0.01599	0.11435	0.03152	0.12608	0.0251
0.11855	0.01599	0.11235	0.03157	0.12497	0.0251
0.1122	0.01604	0.11339	0.03157	0.1253	0.02514
0.11681	0.01604	0.1128	0.03157	0.12567	0.02514
0.11687	0.01604	0.11311	0.03157	0.12534	0.02514
0.11706	0.01604	0.11216	0.03157	0.12684	0.02514
0.11606	0.01604	0.11292	0.03161	0.12589	0.02514
0.11674	0.01604	0.11188	0.03161	0.12544	0.02519
0.11645	0.01608	0.11289	0.03161	0.12571	0.02519
0.11763	0.01608	0.11389	0.03161	0.12673	0.02519
0.11807	0.01608	0.11979	0.03165	0.12489	0.02519
0.11682	0.01608	0.11471	0.03165	0.12563	0.02519
0.11691	0.01608	0.11504	0.03165	0.12639	0.02524
0.11819	0.01608	0.11525	0.03165	0.12553	0.02524
0.11827	0.01612	0.11516	0.03165	0.12623	0.02524
0.1193	0.01612	0.1164	0.0317	0.12617	0.02524
0.12047	0.01612	0.11544	0.0317	0.12595	0.02524
0.11982	0.01612	0.1162	0.0317	0.1269	0.02528
0.11856	0.01612	0.11523	0.0317	0.12659	0.02528
0.11907	0.01617	0.11532	0.0317	0.12687	0.02528
0.11953	0.01617	0.11379	0.03174	0.12655	0.02528
0.11874	0.01617	0.11417	0.03174	0.12655	0.02533
0.11989	0.01617	0.11481	0.03174	0.12707	0.02533
0.1198	0.01617	0.11516	0.03174	0.12791	0.02533
0.11912	0.01617	0.11518	0.03174	0.12548	0.02533
0.11892	0.01621	0.11569	0.03179	0.12636	0.02533
0.11876	0.01621	0.11557	0.03179	0.1278	0.02533
0.1197	0.01621	0.11687	0.03179	0.12767	0.02537
0.12008	0.01621	0.11595	0.03179	0.12727	0.02537
0.12003	0.01621	0.12781	0.03183	0.12759	0.02537
0.11998	0.01626	0.11733	0.03183	0.12759	0.02537
0.12075	0.01626	0.11786	0.03183	0.12997	0.02542
0.12042	0.01626	0.1183	0.03183	0.12931	0.02542
0.12038	0.01626	0.11788	0.03183	0.12815	0.02542
0.12175	0.01626	0.11791	0.03188	0.12893	0.02542
0.13091	0.0163	0.11788	0.03188	0.13118	0.02546
0.12126	0.0163	0.11659	0.03188	0.13015	0.02546
0.12125	0.0163	0.11797	0.03188	0.13045	0.02546
0.12095	0.0163	0.11853	0.03188	0.13218	0.02546
0.12035	0.0163	0.10837	0.03192	0.1328	0.02551
0.12148	0.01634	0.11701	0.03192	0.13208	0.02551
0.12175	0.01634	0.11714	0.03192	0.1328	0.02551
0.12198	0.01634	0.11775	0.03192	0.13392	0.02556
0.12162	0.01634	0.11892	0.03192	0.13317	0.02556
0.12231	0.01634	0.11902	0.03192	0.13287	0.02556
0.11628	0.01639	0.11839	0.03196	0.1332	0.0256
0.11491	0.01639	0.11738	0.03196	0.13392	0.0256
0.12074	0.01639	0.11953	0.03196	0.13418	0.0256
0.11996	0.01639	0.11879	0.03196	0.13501	0.02565
0.1213	0.01639	0.11943	0.03196	0.13359	0.02565
0.12143	0.01639	0.12326	0.03201	0.13512	0.02569
0.12121	0.01643	0.12021	0.03201	0.13371	0.02569
0.12246	0.01643	0.11976	0.03201	0.13548	0.02574
0.12212	0.01643	0.12083	0.03201	0.13456	0.02574
0.12222	0.01643	0.12036	0.03201	0.13559	0.02579
0.12098	0.01643	0.1192	0.03205	0.13531	0.02579
0.12808	0.01648	0.11861	0.03205	0.13522	0.02583
0.12223	0.01648	0.12051	0.03205	0.13622	0.02583
0.12364	0.01648	0.1191	0.03205	0.13629	0.02588
0.12199	0.01648	0.11966	0.03205	0.13786	0.02588
0.12052	0.01648	0.12058	0.03205	0.13724	0.02592
0.12031	0.01648	0.1111	0.0321	0.13915	0.02592
0.12166	0.01652	0.12066	0.0321	0.13977	0.02597
0.12149	0.01652	0.12084	0.0321	0.14033	0.02597
0.12167	0.01652	0.12061	0.0321	0.14066	0.02602
0.1208	0.01652	0.12154	0.0321	0.14234	0.02602
0.12089	0.01652	0.12131	0.03214	0.14282	0.02606
0.11184	0.01656	0.12222	0.03214	0.14255	0.02606
0.12052	0.01656	0.12213	0.03214	0.14243	0.02611
0.1198	0.01656	0.12209	0.03214	0.14381	0.02615
0.12098	0.01656	0.12217	0.03214	0.14464	0.02615
0.1212	0.01656	0.13349	0.03218	0.14475	0.0262
0.11979	0.01661	0.12229	0.03218	0.14529	0.02624
0.12112	0.01661	0.12259	0.03218	0.14656	0.02624
0.12254	0.01661	0.12149	0.03218	0.14648	0.02629
0.12172	0.01661	0.1213	0.03218	0.1481	0.02634
0.12186	0.01661	0.12153	0.03218	0.14927	0.02634
0.12858	0.01665	0.12294	0.03223	0.14922	0.02638
0.12237	0.01665	0.1225	0.03223	0.14888	0.02643
0.12298	0.01665	0.12181	0.03223	0.15085	0.02643
0.12282	0.01665	0.12204	0.03223	0.14884	0.02647
0.12237	0.01665	0.12166	0.03223	0.14966	0.02652
0.1231	0.01669	0.12308	0.03223	0.1514	0.02657
0.12422	0.01669	0.12162	0.03227	0.15104	0.02657
0.1231	0.01669	0.12176	0.03227	0.15185	0.02661
0.12353	0.01669	0.12139	0.03227	0.15378	0.02666
0.12336	0.01669	0.12107	0.03227	0.15149	0.02666
0.12451	0.01669	0.12189	0.03227	0.1528	0.0267
0.12007	0.01674	0.12221	0.03232	0.1514	0.02675
0.1241	0.01674	0.1224	0.03232	0.15084	0.02679
0.12358	0.01674	0.12246	0.03232	0.15183	0.02684
0.12372	0.01674	0.12149	0.03232	0.15254	0.02689
0.12408	0.01674	0.12089	0.03232	0.15269	0.02689
0.12437	0.01678	0.12145	0.03232	0.15239	0.02698
0.12518	0.01678	0.13001	0.03236	0.15363	0.02698
0.12422	0.01678	0.12382	0.03236	0.15381	0.02702
0.12487	0.01678	0.12442	0.03236	0.15468	0.02707
0.12625	0.01678	0.12284	0.03236	0.15424	0.02712
0.12606	0.01683	0.12319	0.03236	0.15708	0.02716
0.12642	0.01683	0.12349	0.0324	0.15725	0.02721
0.12661	0.01683	0.12428	0.0324	0.15803	0.02725
0.12685	0.01683	0.12315	0.0324	0.15708	0.0273
0.12707	0.01687	0.12474	0.0324	0.15605	0.02735
0.12701	0.01687	0.12409	0.0324	0.1572	0.02739
0.12708	0.01687	0.11695	0.03245	0.15814	0.02744
0.12624	0.01687	0.12271	0.03245	0.15966	0.02753
0.12791	0.01687	0.12198	0.03245	0.15882	0.02753
0.12134	0.01691	0.12294	0.03245	0.15995	0.02757
0.12778	0.01691	0.12278	0.03245	0.16034	0.02767
0.12702	0.01691	0.12377	0.03245	0.16046	0.02767
0.12772	0.01691	0.12336	0.03249	0.16096	0.02776
0.12825	0.01691	0.12349	0.03249	0.16257	0.0278
0.12735	0.01691	0.12408	0.03249	0.16175	0.02785
0.12791	0.01696	0.12391	0.03249	0.16131	0.0279
0.12674	0.01696	0.12445	0.03249	0.16292	0.02794
0.12864	0.01696	0.13383	0.03254	0.1621	0.02799
0.12827	0.01696	0.12629	0.03254	0.16138	0.02808
0.14016	0.017	0.12447	0.03254	0.16229	0.02808
0.12931	0.017	0.12492	0.03254	0.16306	0.02817
0.12932	0.017	0.12632	0.03254	0.16168	0.02831
0.12977	0.017	0.12399	0.03258	0.16246	0.02854
0.12964	0.017	0.12441	0.03258	0.16329	0.02854
0.12991	0.01705	0.12559	0.03258	0.16186	0.02863
0.1301	0.01705	0.12525	0.03258	0.16293	0.02868
0.13109	0.01705	0.12338	0.03258	0.16383	0.02877
0.13139	0.01705	0.12093	0.03262	0.16376	0.02881
0.12928	0.01709	0.12405	0.03262	0.16485	0.02886
0.12963	0.01709	0.12497	0.03262	0.16493	0.02895
0.12984	0.01709	0.12552	0.03262	0.16566	0.029
0.12894	0.01709	0.12441	0.03262	0.16586	0.02923
0.13047	0.01713	0.12499	0.03262	0.16758	0.02941
0.12872	0.01713	0.12629	0.03267	0.16841	0.0295
0.13032	0.01713	0.12428	0.03267	0.16815	0.02955
0.12976	0.01713	0.12589	0.03267	0.16479	0.02968
0.14099	0.01718	0.12529	0.03267	0.16413	0.02973
0.13011	0.01718	0.12428	0.03267	0.16678	0.02978
0.13105	0.01718	0.13594	0.03271	0.16839	0.02991
0.13192	0.01718	0.12669	0.03271	0.16899	0.02996
0.13338	0.01722	0.1267	0.03271	0.17254	0.03005
0.13141	0.01722	0.12769	0.03271	0.17185	0.0301
0.13151	0.01722	0.12737	0.03271	0.17252	0.03014
0.12223	0.01726	0.12656	0.03276	0.17549	0.03028
0.13113	0.01726	0.12638	0.03276	0.1773	0.03033
0.1297	0.01726	0.12684	0.03276	0.17864	0.03046
0.12935	0.01726	0.12646	0.03276	0.18017	0.03051
0.12981	0.01731	0.12736	0.03276	0.18103	0.03056
0.1302	0.01731	0.11786	0.0328	0.1775	0.03065
0.13021	0.01731	0.1267	0.0328	0.18073	0.03074
0.13862	0.01735	0.12643	0.0328	0.18237	0.03079
0.13288	0.01735	0.12578	0.0328	0.18366	0.03092
0.13239	0.01735	0.12623	0.0328	0.18489	0.03097
0.13247	0.0174	0.12771	0.03284	0.18648	0.03106
0.13288	0.0174	0.12592	0.03284	0.18645	0.03115
0.13252	0.0174	0.12629	0.03284	0.18553	0.0312
0.1278	0.01744	0.12597	0.03284	0.18631	0.03129
0.13221	0.01744	0.12555	0.03284	0.18657	0.03138
0.13193	0.01748	0.13742	0.03289	0.18837	0.03147
0.13275	0.01748	0.12808	0.03289	0.18981	0.03152
0.13175	0.01748	0.12884	0.03289	0.19042	0.03161
0.13175	0.01748	0.12837	0.03289	0.1932	0.03175
0.13295	0.01753	0.12865	0.03293	0.19646	0.03189
0.13316	0.01753	0.12763	0.03293	0.20149	0.03212
0.13263	0.01757	0.12889	0.03293	0.20339	0.0323
0.13257	0.01757	0.12834	0.03293	0.20302	0.03235
0.13294	0.01757	0.12939	0.03293	0.204	0.03244
0.13093	0.01762	0.12773	0.03298	0.20245	0.03257
0.13266	0.01762	0.12827	0.03298	0.20171	0.03262
0.13331	0.01766	0.12801	0.03298	0.2026	0.03276
0.13388	0.01766	0.12921	0.03298	0.20487	0.0328
0.13458	0.01766	0.13019	0.03302	0.20623	0.03294
0.14176	0.0177	0.13035	0.03302	0.20731	0.03299
0.13449	0.0177	0.13156	0.03302	0.20583	0.03308
0.13414	0.01775	0.14188	0.03306	0.20893	0.03317
0.13419	0.01775	0.1316	0.03306	0.20899	0.03326
0.13467	0.01775	0.13112	0.03306	0.21055	0.03331
0.13321	0.01779	0.13139	0.03306	0.20972	0.03358
0.13433	0.01779	0.13172	0.03311	0.21118	0.03386
0.13599	0.01784	0.13248	0.03311	0.21335	0.034
0.13498	0.01784	0.13333	0.03311	0.21172	0.03413
0.14207	0.01788	0.13258	0.03311	0.21265	0.03418
0.13579	0.01788	0.13467	0.03315	0.21492	0.03427
0.1362	0.01788	0.13217	0.03315	0.21508	0.03441
0.13682	0.01792	0.13368	0.03315	0.21595	0.03446
0.13641	0.01792	0.13368	0.0332	0.21831	0.03464
0.13621	0.01797	0.133	0.0332	0.21755	0.03468
0.1374	0.01797	0.13405	0.0332	0.2205	0.03482
0.13844	0.01801	0.14256	0.03324	0.21763	0.03491
0.13783	0.01801	0.13434	0.03324	0.21596	0.03496
0.14034	0.01805	0.1342	0.03324	0.21545	0.0351
0.13863	0.01805	0.13521	0.03324	0.21546	0.03519
0.13988	0.0181	0.13661	0.03329	0.21493	0.03528
0.139	0.0181	0.13561	0.03329	0.21499	0.03542
0.1323	0.01814	0.13624	0.03329	0.21596	0.03551
0.14017	0.01814	0.12465	0.03333	0.21665	0.03565
0.14151	0.01819	0.13556	0.03333	0.21819	0.03574
0.15344	0.01823	0.13523	0.03333	0.22074	0.03583
0.14208	0.01823	0.13529	0.03337	0.22471	0.03597
0.14147	0.01827	0.13681	0.03337	0.22738	0.03606
0.1423	0.01827	0.13541	0.03337	0.22901	0.03624
0.14051	0.01832	0.14745	0.03342	0.2287	0.03629
0.14328	0.01832	0.13852	0.03342	0.22806	0.03638
0.14356	0.01836	0.13862	0.03342	0.22818	0.03652
0.15257	0.01841	0.14078	0.03342	0.23075	0.03661
0.14258	0.01845	0.13989	0.03346	0.2331	0.03675
0.14389	0.01845	0.13905	0.03346	0.23654	0.03684
0.13193	0.01849	0.14002	0.03346	0.23676	0.03693
0.14343	0.01849	0.13827	0.0335	0.23818	0.03712
0.14399	0.01854	0.13914	0.0335	0.24098	0.03716
0.14507	0.01858	0.13883	0.0335	0.24301	0.03725
0.14483	0.01862	0.14082	0.03355	0.24512	0.03744
0.13691	0.01867	0.14026	0.03355	0.24549	0.03753
0.14346	0.01867	0.15078	0.03359	0.24252	0.03767
0.14502	0.01871	0.14272	0.03359	0.24255	0.03776
0.15401	0.01876	0.14272	0.03359	0.24064	0.0378
0.14608	0.0188	0.14258	0.03364	0.24116	0.03799
0.14675	0.0188	0.14339	0.03364	0.24241	0.03803
0.14684	0.01889	0.1324	0.03368	0.24799	0.03822
0.14679	0.01889	0.14286	0.03368	0.25051	0.03831
0.14961	0.01893	0.14176	0.03373	0.25178	0.0384
0.14866	0.01897	0.14199	0.03373	0.25345	0.03854
0.14246	0.01902	0.14236	0.03373	0.25619	0.03863
0.14934	0.01906	0.14385	0.03377	0.25625	0.03881
0.1502	0.01906	0.1424	0.03381	0.25599	0.03891
0.15216	0.01915	0.14384	0.03381	0.25554	0.039
0.15178	0.01915	0.13421	0.03386	0.25106	0.03913
0.15066	0.01919	0.1431	0.03386	0.25122	0.03923
0.15041	0.01924	0.14374	0.0339	0.25738	0.03941
0.15469	0.01928	0.15325	0.03395	0.2582	0.03946
0.1542	0.01933	0.14594	0.03395	0.25731	0.03955
0.1527	0.01937	0.14608	0.03395	0.2506	0.03973
0.15266	0.01941	0.14584	0.03399	0.2495	0.03982
0.15425	0.01946	0.13841	0.03403	0.25326	0.04001
0.15362	0.0195	0.14675	0.03408	0.25543	0.0401
0.14649	0.01955	0.14621	0.03408	0.2521	0.04019
0.15378	0.01959	0.14819	0.03412	0.25359	0.04037
0.16294	0.01963	0.14847	0.03417	0.25341	0.04046
0.15273	0.01972	0.14745	0.03417	0.25744	0.04065
0.14835	0.01972	0.1368	0.03421	0.25818	0.04074
0.1636	0.01981	0.14646	0.03421	0.25901	0.04083
0.15764	0.01981	0.14828	0.03425	0.26064	0.04102
0.15085	0.0199	0.15087	0.0343	0.26117	0.04111
0.15764	0.01994	0.15015	0.03434	0.26246	0.04129
0.16254	0.01998	0.14948	0.03434	0.26146	0.04138
0.15956	0.02003	0.14567	0.03439	0.25936	0.04147
0.15828	0.02007	0.15093	0.03443	0.25868	0.0417
0.15837	0.02012	0.16243	0.03447	0.26143	0.04175
0.16212	0.0202	0.15297	0.03447	0.26418	0.04198
0.15344	0.02025	0.15271	0.03452	0.26247	0.04207
0.16072	0.02029	0.14293	0.03456	0.26138	0.04221
0.16926	0.02034	0.15386	0.03461	0.26299	0.04235
0.16334	0.02038	0.16404	0.03465	0.2646	0.04248
0.16177	0.02047	0.15553	0.03469	0.26711	0.04257
0.17153	0.02051	0.15241	0.03474	0.26652	0.04276
0.15823	0.0206	0.15587	0.03474	0.26762	0.04285
0.16087	0.0206	0.15709	0.03478	0.27108	0.04308
0.172	0.02069	0.16874	0.03483	0.26724	0.04322
0.16346	0.02073	0.15928	0.03487	0.2722	0.0434
0.163	0.02082	0.15289	0.03491	0.27194	0.04349
0.17134	0.02086	0.16067	0.03496	0.27534	0.04358
0.15368	0.02095	0.1718	0.035	0.27703	0.04377
0.16182	0.02099	0.16322	0.035	0.27775	0.0439
0.17349	0.02104	0.15644	0.03509	0.27972	0.044
0.16403	0.02108	0.16476	0.03509	0.27717	0.04423
0.16295	0.02112	0.1732	0.03518	0.27972	0.04432
0.16807	0.02126	0.16603	0.03518	0.28603	0.0445
0.16728	0.02126	0.16558	0.03522	0.28564	0.04464
0.17347	0.02139	0.16468	0.03531	0.28587	0.04473
0.16972	0.02143	0.16268	0.03531	0.28688	0.04491
0.1663	0.02148	0.17428	0.03536	0.28659	0.04501
0.17471	0.02156	0.16608	0.0354	0.28567	0.04523
0.16632	0.02165	0.16178	0.03544	0.28511	0.04533
0.17271	0.02169	0.16724	0.03549	0.28553	0.04542
0.17622	0.02178	0.1719	0.03553	0.28561	0.04565
0.1689	0.02183	0.16263	0.03562	0.2862	0.04574
0.17469	0.02187	0.17046	0.03566	0.2886	0.04597
0.17712	0.02196	0.16943	0.03566	0.28855	0.04611
0.16989	0.022	0.17246	0.03575	0.29425	0.04629
0.1903	0.02209	0.16506	0.0358	0.29191	0.04643
0.17928	0.02213	0.17326	0.03584	0.29085	0.04652
0.17833	0.02222	0.18499	0.03588	0.2949	0.0467
0.18692	0.02226	0.17559	0.03593	0.29464	0.04684
0.17673	0.0224	0.17116	0.03597	0.29497	0.04698
0.17934	0.0224	0.1745	0.03602	0.29958	0.04721
0.17036	0.02253	0.17791	0.0361	0.30127	0.04725
0.17999	0.02257	0.17646	0.0361	0.30183	0.04753
0.18114	0.02266	0.17613	0.03619	0.30432	0.04762
0.17176	0.0227	0.18752	0.03624	0.30417	0.04776
0.18717	0.02279	0.17967	0.03628	0.30532	0.04794
0.17311	0.02288	0.17718	0.03632	0.30629	0.04803
0.18267	0.02292	0.17959	0.03637	0.30754	0.04831
0.18552	0.02301	0.18193	0.03646	0.30897	0.04835
0.17865	0.0231	0.17201	0.0365	0.31257	0.04849
0.19021	0.02319	0.19165	0.03659	0.31568	0.04872
0.17944	0.02323	0.18591	0.03663	0.31631	0.04886
0.19679	0.02332	0.17527	0.03668	0.32069	0.04904
0.1881	0.02336	0.18344	0.03672	0.32185	0.04918
0.19588	0.02349	0.19311	0.03677	0.32087	0.04927
0.18855	0.02354	0.17928	0.03685	0.3198	0.04946
0.18951	0.02362	0.18108	0.03685	0.31778	0.04959
0.19185	0.02371	0.18356	0.03699	0.31512	0.04982
0.19067	0.0238	0.1786	0.03703	0.31322	0.04991
0.19919	0.02384	0.17436	0.03703	0.31559	0.05005
0.19048	0.02398	0.19291	0.03712	0.31206	0.05028
0.20003	0.02402	0.18479	0.03716	0.31391	0.05042
0.18419	0.02415	0.18406	0.03729	0.31622	0.05065
0.20362	0.02419	0.19264	0.03729	0.31664	0.05079
0.19399	0.02424	0.17524	0.03738	0.31785	0.05088
0.20083	0.02437	0.18946	0.03747	0.32152	0.05111
0.19506	0.02441	0.18654	0.03751	0.32234	0.05124
0.20471	0.02455	0.18451	0.03756	0.32512	0.05147
0.19613	0.02459	0.19642	0.03765	0.3261	0.05157
0.20288	0.02472	0.17766	0.03773	0.32711	0.0517
0.19633	0.02476	0.18813	0.03778	0.32888	0.05198
0.20668	0.0249	0.19747	0.03782	0.33203	0.05212
0.19689	0.02494	0.17934	0.03791	0.33462	0.0523
0.20683	0.02507	0.18782	0.03795	0.33539	0.05244
0.19277	0.02516	0.19242	0.03804	0.33436	0.05257
0.20721	0.02525	0.18642	0.03813	0.33729	0.05276
0.19178	0.02534	0.19868	0.03817	0.33836	0.0529
0.19892	0.02538	0.1824	0.03826	0.34129	0.05303
0.19221	0.02551	0.1954	0.03835	0.34227	0.05331
0.20154	0.02555	0.19595	0.03844	0.34297	0.0534
0.19543	0.02569	0.19423	0.03848	0.34744	0.05363
0.20355	0.02573	0.20508	0.03853	0.34916	0.05377
0.1946	0.02586	0.18737	0.03862	0.35084	0.054
0.21407	0.02595	0.19708	0.03866	0.35241	0.05409
0.19753	0.02608	0.18998	0.03879	0.35233	0.05423
0.21406	0.02612	0.19843	0.03884	0.35363	0.0545
0.21296	0.0263	0.20228	0.03892	0.35372	0.05459
0.21099	0.02634	0.19631	0.03897	0.35636	0.05473
0.2145	0.02647	0.21262	0.03906	0.35976	0.05496
0.20875	0.02652	0.19833	0.03914	0.36055	0.05505
0.21678	0.02665	0.20337	0.03919	0.36589	0.05533
0.20092	0.02674	0.19919	0.03932	0.36772	0.05542
0.20802	0.02678	0.2056	0.03936	0.36969	0.05565
0.20069	0.02696	0.20777	0.03945	0.36741	0.05579
0.21771	0.027	0.19636	0.0395	0.36824	0.05592
0.20824	0.02713	0.21282	0.03958	0.36694	0.05611
0.22181	0.02722	0.19739	0.03967	0.36629	0.05624
0.21539	0.02735	0.20377	0.03972	0.36488	0.05638
0.21427	0.0274	0.19586	0.03985	0.36496	0.05666
0.22568	0.02757	0.21191	0.03994	0.35871	0.05675
0.20867	0.02762	0.21776	0.03994	0.36103	0.05698
0.21776	0.02775	0.20582	0.04007	0.36446	0.05712
0.20932	0.02784	0.21322	0.04016	0.37367	0.05735
0.21108	0.02797	0.20649	0.04025	0.37613	0.05748
0.22252	0.02805	0.21644	0.04029	0.37837	0.05762
0.21285	0.02819	0.2138	0.04042	0.37958	0.0579
0.232	0.02827	0.2172	0.04051	0.37831	0.05799
0.23118	0.02841	0.20466	0.04055	0.38355	0.05813
0.22366	0.02845	0.22525	0.04069	0.38506	0.0584
0.22087	0.02854	0.21108	0.04073	0.38568	0.05854
0.21682	0.02871	0.22112	0.04086	0.38648	0.05877
0.23559	0.02876	0.21171	0.04091	0.38819	0.05891
0.23355	0.02893	0.22522	0.04104	0.38939	0.05904
0.23018	0.02898	0.21473	0.04108	0.39096	0.05923
0.23666	0.02915	0.23438	0.04117	0.39282	0.05936
0.22106	0.02919	0.22039	0.04126	0.39409	0.05964
0.22316	0.02937	0.23468	0.04135	0.394	0.05978
0.23509	0.02946	0.23048	0.04139	0.39326	0.05987
0.22149	0.02959	0.24288	0.04152	0.39634	0.06014
0.2429	0.02963	0.22401	0.04161	0.39755	0.06028
0.24244	0.02981	0.24206	0.0417	0.39704	0.06051
0.23642	0.02985	0.22485	0.04179	0.3961	0.06065
0.24414	0.03003	0.24343	0.04192	0.3929	0.06079
0.22926	0.03012	0.23617	0.04196	0.39243	0.06102
0.22922	0.03025	0.24828	0.0421	0.39234	0.06115
0.24402	0.03033	0.23155	0.04214	0.39346	0.06143
0.22954	0.03042	0.24048	0.04218	0.39029	0.06157
0.24264	0.03055	0.23547	0.04232	0.38832	0.06166
0.23588	0.03064	0.24226	0.04236	0.39436	0.06198
0.23285	0.03082	0.23621	0.04249	0.39702	0.06212
0.25359	0.03091	0.24855	0.04258	0.40196	0.06235
0.2349	0.03099	0.24793	0.04262	0.40317	0.06248
0.23519	0.03117	0.25405	0.04276	0.40507	0.06267
0.25396	0.03121	0.24254	0.04284	0.41082	0.0629
0.2587	0.03139	0.25994	0.04293	0.41057	0.06303
0.24333	0.03148	0.24124	0.04302	0.41424	0.06331
0.24609	0.03165	0.26169	0.04315	0.41619	0.0634
0.25798	0.03174	0.24655	0.0432	0.41697	0.06354
0.24871	0.03183	0.25213	0.04324	0.42431	0.06386
0.24715	0.032	0.24768	0.04342	0.42665	0.064
0.24628	0.03205	0.26154	0.04346	0.4262	0.06423
0.26313	0.03213	0.25149	0.04359	0.42907	0.06436
0.26257	0.03231	0.2691	0.04368	0.43048	0.06459
0.24962	0.0324	0.24734	0.04373	0.43064	0.06473
0.25047	0.03257	0.26925	0.04386	0.42883	0.06487
0.26994	0.03266	0.25492	0.0439	0.43526	0.06514
0.25476	0.03275	0.25397	0.04408	0.43587	0.06524
0.25259	0.03288	0.26156	0.04412	0.43763	0.06537
0.27305	0.03297	0.27446	0.04417	0.43783	0.06565
0.27466	0.03314	0.26952	0.04434	0.43685	0.06574
0.25166	0.03323	0.26343	0.04439	0.43739	0.06602
0.27249	0.03332	0.27475	0.04452	0.43961	0.0662
0.27177	0.03354	0.25313	0.04461	0.44017	0.06643
0.26248	0.03358	0.26411	0.04465	0.43943	0.06657
0.25781	0.03376	0.25523	0.04483	0.43875	0.0667
0.27721	0.03389	0.27186	0.04487	0.44059	0.06693
0.27591	0.03402	0.25834	0.04496	0.44414	0.06707
0.2634	0.03411	0.27073	0.04509	0.44499	0.06739
0.26393	0.03415	0.26254	0.04518	0.44546	0.06753
0.26659	0.03428	0.26022	0.04531	0.44768	0.06762
0.28363	0.03441	0.2762	0.0454	0.44298	0.0679
0.2697	0.0345	0.27182	0.04544	0.44786	0.06803
0.27021	0.03463	0.28165	0.04558	0.45282	0.06831
0.2897	0.03472	0.26494	0.04566	0.45434	0.06845
0.29136	0.03494	0.26645	0.04584	0.45411	0.06858
0.27005	0.03503	0.28016	0.04593	0.45693	0.06881
0.27212	0.03516	0.28331	0.04597	0.45899	0.06895
0.29111	0.03529	0.27943	0.04615	0.45932	0.06927
0.27609	0.03538	0.26263	0.04619	0.46192	0.06936
0.27517	0.03551	0.27162	0.04637	0.46278	0.0695
0.2965	0.03564	0.27544	0.04641	0.46544	0.06978
0.27567	0.03573	0.28025	0.0465	0.46655	0.06991
0.28434	0.03591	0.29106	0.04668	0.46852	0.07019
0.29753	0.03599	0.27207	0.04672	0.46838	0.07033
0.29588	0.03617	0.27577	0.0469	0.46764	0.07046
0.2979	0.0363	0.29361	0.04699	0.47089	0.07069
0.28272	0.03639	0.28027	0.04707	0.47293	0.07088
0.28583	0.03656	0.29579	0.04721	0.47954	0.07115
0.30334	0.03665	0.28162	0.04729	0.48108	0.07129
0.302	0.03687	0.29936	0.04738	0.482	0.07143
0.28984	0.03691	0.29589	0.04751	0.48625	0.0717
0.30472	0.037	0.27795	0.0476	0.48619	0.07179
0.30803	0.03722	0.27651	0.04778	0.48851	0.07207
0.2857	0.03731	0.29029	0.04787	0.49288	0.07225
0.28745	0.03748	0.27745	0.048	0.51395	0.07248
0.30309	0.03762	0.29008	0.04809	0.52964	0.07262
0.30816	0.03775	0.28016	0.04817	0.54494	0.07276
0.30975	0.03788	0.28407	0.04835	0.56203	0.07294
0.2946	0.03797	0.29248	0.04844	0.56659	0.07303
0.30274	0.03819	0.27725	0.04853	0.57254	0.07317
0.31849	0.03823	0.27405	0.0487	0.58122	0.07335
0.30618	0.03836	0.29529	0.04879	0.58172	0.07345
0.30467	0.03854	0.2992	0.04897	0.58311	0.07363
0.32212	0.03862	0.28226	0.04906	0.58213	0.07372
0.32499	0.0388	0.29771	0.04914	0.58629	0.0739
0.32115	0.03893	0.29281	0.04932	0.58829	0.074
0.32189	0.03911	0.28396	0.04941	0.59075	0.07409
0.30913	0.03919	0.30135	0.0495	0.59357	0.07427
0.32726	0.03928	0.29355	0.04972	0.59056	0.07436
0.32647	0.0395	0.29931	0.0498	0.59214	0.07446
0.31469	0.03955	0.29304	0.04994	0.58994	0.07464
0.32819	0.03968	0.30003	0.05007	0.5879	0.07473
0.31262	0.0399	0.30913	0.05016	0.58713	0.07496
0.32724	0.03998	0.31713	0.05033	0.58676	0.07505
0.33037	0.04016	0.30331	0.05042	0.58296	0.07523
0.31168	0.04029	0.29892	0.0506	0.58006	0.07533
0.32627	0.04038	0.3189	0.05069	0.5771	0.07546
0.328	0.04055	0.29901	0.05077	0.57576	0.07565
0.3225	0.04069	0.30343	0.05095	0.57555	0.07574
0.33177	0.0409	0.31907	0.05104	0.57013	0.07588
0.31324	0.04099	0.3028	0.05113	0.56992	0.07606
0.33265	0.04108	0.3009	0.0513	0.56375	0.0762
0.3199	0.0413	0.31393	0.05139	0.5475	0.07643
0.33667	0.04139	0.31541	0.05161	0.53944	0.07652
0.3381	0.04161	0.29786	0.0517	0.53023	0.07679
0.32552	0.04169	0.31606	0.05179	0.53051	0.07693
0.33226	0.04183	0.30159	0.05201	0.5321	0.07702
0.32978	0.042	0.31529	0.0521	0.5254	0.07734
0.34655	0.04209	0.3173	0.05227	0.52446	0.07748
0.34635	0.04231	0.30247	0.0524	0.52562	0.07771
0.33041	0.0424	0.31854	0.05249	0.53003	0.0779
0.33946	0.04253	0.30467	0.05271	0.53954	0.07812
0.33318	0.04275	0.31508	0.0528	0.54661	0.07831
0.3472	0.04279	0.32303	0.05298	0.54929	0.07845
0.3497	0.04305	0.30506	0.05311	0.55855	0.07868
0.35057	0.04314	0.3252	0.0532	0.56413	0.07881
0.35267	0.04332	0.30707	0.05342	0.56978	0.07909
0.33917	0.04345	0.32277	0.05351	0.57228	0.07918
0.35741	0.04358	0.31043	0.05359	0.57187	0.07932
0.34804	0.04376	0.31389	0.05381	0.57554	0.07959
0.36226	0.04384	0.31556	0.05395	0.57215	0.07973
0.34594	0.04398	0.31313	0.05412	0.56932	0.07996
0.3623	0.04419	0.32833	0.05421	0.57572	0.0801
0.35214	0.04428	0.31472	0.05434	0.58498	0.08033
0.34824	0.0445	0.33224	0.05456	0.58874	0.08046
0.35705	0.04463	0.32732	0.05465	0.59124	0.0806
0.35014	0.04481	0.33383	0.05474	0.59508	0.08088
0.36378	0.04494	0.3372	0.05496	0.59441	0.08097
0.34907	0.04503	0.33573	0.05509	0.59401	0.08111
0.35992	0.04525	0.33729	0.05527	0.59094	0.08138
0.35761	0.04534	0.32401	0.0554	0.59191	0.08147
0.37336	0.04547	0.34342	0.05549	0.59182	0.08175
0.37623	0.04564	0.32976	0.05571	0.59571	0.08189
0.37223	0.04577	0.34433	0.05584	0.60037	0.08212
0.37865	0.04599	0.34907	0.05602	0.60359	0.08225
0.36152	0.04608	0.33191	0.05615	0.60073	0.08239
0.37951	0.04634	0.33443	0.05624	0.61008	0.08257
0.3615	0.04643	0.33037	0.05641	0.61665	0.08271
0.36785	0.04656	0.34199	0.05654	0.6179	0.08285
0.37129	0.04674	0.32815	0.05668	0.61496	0.08312
0.38356	0.04687	0.34393	0.0569	0.61494	0.08322
0.38528	0.04705	0.3301	0.05703	0.60778	0.08349
0.38694	0.04718	0.34543	0.05721	0.60181	0.08363
0.37208	0.04731	0.3267	0.05734	0.59768	0.08386
0.39176	0.04753	0.34519	0.05747	0.59353	0.084
0.37576	0.04762	0.3323	0.05765	0.59262	0.08413
0.37449	0.04783	0.3512	0.05778	0.58668	0.08436
0.37567	0.04797	0.33696	0.058	0.58287	0.08455
0.3949	0.0481	0.35321	0.05809	0.57129	0.08487
0.39829	0.04827	0.33801	0.05822	0.56642	0.08496
0.39492	0.0484	0.35516	0.05844	0.5648	0.08514
0.38084	0.04854	0.34337	0.05857	0.56941	0.08546
0.38602	0.04876	0.34776	0.05879	0.56624	0.0856
0.38137	0.04884	0.34304	0.05888	0.57075	0.08592
0.39829	0.04911	0.36347	0.05901	0.57332	0.08611
0.40084	0.04919	0.35638	0.05923	0.57394	0.08624
0.38924	0.04941	0.37011	0.05936	0.57759	0.08661
0.39451	0.04955	0.35486	0.05945	0.58094	0.08679
0.40169	0.04963	0.37356	0.05972	0.58596	0.08707
0.40717	0.04985	0.356	0.0598	0.58861	0.08725
0.40795	0.04998	0.37585	0.06002	0.59389	0.08753
0.41247	0.0502	0.35895	0.06016	0.59982	0.08771
0.40364	0.05034	0.35828	0.06033	0.60445	0.08785
0.39623	0.05047	0.36401	0.06047	0.60228	0.08817
0.39942	0.05064	0.37668	0.0606	0.598	0.08831
0.40082	0.05077	0.36691	0.06082	0.60279	0.08863
0.40773	0.05104	0.382	0.06091	0.6022	0.08877
0.40138	0.05112	0.367	0.06104	0.60292	0.08895
0.4196	0.05121	0.38397	0.0613	0.60158	0.08927
0.41199	0.05148	0.37107	0.06139	0.60405	0.08946
0.42365	0.05161	0.38276	0.06161	0.6108	0.08973
0.42592	0.05178	0.36671	0.06174	0.61383	0.08991
0.42223	0.05191	0.37427	0.06188	0.61852	0.09019
0.40942	0.05205	0.36928	0.06205	0.61799	0.09037
0.41626	0.05226	0.38877	0.06218	0.61841	0.09051
0.41412	0.0524	0.37389	0.06245	0.6221	0.09088
0.43071	0.05262	0.3864	0.06258	0.62338	0.09097
0.41716	0.0527	0.39067	0.06271	0.62583	0.09115
0.43198	0.05297	0.38871	0.06293	0.63004	0.09147
0.41645	0.0531	0.38906	0.06302	0.63141	0.09157
0.43406	0.05319	0.37317	0.06315	0.63996	0.09193
0.4238	0.05345	0.39078	0.06337	0.64395	0.09207
0.43994	0.05354	0.37601	0.0635	0.64957	0.09235
0.423	0.05376	0.39546	0.06377	0.65392	0.09248
0.43978	0.05389	0.38984	0.0639	0.65332	0.09267
0.43794	0.05402	0.38238	0.06403	0.65461	0.0929
0.44125	0.05424	0.39049	0.06425	0.65583	0.09308
0.43634	0.05437	0.38265	0.06439	0.65825	0.09335
0.43947	0.05463	0.39276	0.06452	0.66353	0.09354
0.43409	0.05472	0.38389	0.06474	0.66724	0.09363
0.43164	0.05485	0.39709	0.06487	0.67341	0.09395
0.44636	0.05512	0.39221	0.06513	0.66925	0.09409
0.4374	0.05525	0.38815	0.06527	0.66989	0.09432
0.45033	0.05547	0.39215	0.06549	0.66757	0.0945
0.44086	0.0556	0.38736	0.06562	0.6642	0.09464
0.45601	0.05582	0.39622	0.06575	0.6613	0.09491
0.44528	0.05595	0.39859	0.06602	0.66403	0.09505
0.44146	0.05608	0.39563	0.0661	0.66586	0.09537
0.44414	0.0563	0.4041	0.06624	0.66483	0.09546
0.44539	0.05643	0.3911	0.0665	0.66385	0.09565
0.45232	0.05656	0.40775	0.06659	0.66312	0.09597
0.44575	0.05678	0.39637	0.0669	0.67019	0.09611
0.46012	0.05691	0.39199	0.06703	0.66929	0.09638
0.455	0.05718	0.4008	0.06716	0.66818	0.09657
0.44868	0.05731	0.39821	0.06738	0.66617	0.0967
0.45932	0.05753	0.39575	0.06756	0.67361	0.09698
0.4521	0.05766	0.41086	0.06782	0.67859	0.09716
0.45997	0.05779	0.39043	0.06791	0.68298	0.09748
0.4542	0.05801	0.39644	0.06804	0.68553	0.09757
0.45592	0.05814	0.41034	0.06835	0.68428	0.09776
0.47405	0.05845	0.40867	0.06848	0.6861	0.09808
0.45974	0.05854	0.40504	0.06875	0.68781	0.09817
0.47224	0.05867	0.41397	0.06888	0.68929	0.09849
0.46828	0.05893	0.41231	0.06906	0.68624	0.09868
0.46672	0.05902	0.40294	0.06928	0.68777	0.09895
0.47725	0.05928	0.40755	0.06945	0.68939	0.09909
0.46696	0.05946	0.41282	0.06976	0.69199	0.09927
0.46347	0.05959	0.40395	0.06989	0.69529	0.09955
0.47536	0.05981	0.40169	0.06998	0.69454	0.09968
0.46598	0.05994	0.41531	0.07029	0.69094	0.09987
0.47876	0.06025	0.41191	0.07047	0.69572	0.10019
0.46802	0.06033	0.40466	0.07073	0.69372	0.10028
0.47077	0.06047	0.41119	0.07086	0.68975	0.10065
0.48547	0.06073	0.40945	0.07104	0.69194	0.10079
0.47047	0.06082	0.40694	0.0713	0.69769	0.10106
0.47997	0.06112	0.40592	0.07143	0.70239	0.10124
0.49045	0.06126	0.42279	0.07174	0.7002	0.10143
0.49142	0.06143	0.42516	0.07192	0.69837	0.1017
0.48619	0.06165	0.42368	0.07201	0.70038	0.10189
0.49488	0.06178	0.41525	0.07232	0.70441	0.10202
0.47799	0.06205	0.419	0.07249	0.70731	0.1023
0.48704	0.06218	0.42814	0.07262	0.70696	0.10248
0.49669	0.06231	0.42999	0.07289	0.71335	0.1028
0.48678	0.06262	0.43145	0.07306	0.71299	0.10299
0.49272	0.0627	0.43522	0.07337	0.71778	0.10326
0.49784	0.06301	0.44518	0.0735	0.72106	0.10345
0.48947	0.06314	0.4534	0.07364	0.72029	0.10358
0.48462	0.06327	0.44477	0.0739	0.72199	0.10386
0.50177	0.06354	0.44667	0.07408	0.72332	0.10404
0.50125	0.06367	0.46229	0.0743	0.72301	0.10423
0.49325	0.06398	0.46131	0.07447	0.72051	0.1045
0.50719	0.06411	0.4559	0.07461	0.72146	0.10464
0.51182	0.06424	0.47485	0.07483	0.72052	0.10501
0.50479	0.06455	0.46897	0.075	0.72138	0.1051
0.50042	0.06468	0.47302	0.07527	0.72441	0.10546
0.51844	0.06494	0.48423	0.0754	0.72047	0.10565
0.51472	0.06507	0.46622	0.07549	0.71564	0.10579
0.50881	0.06525	0.48104	0.0758	0.72168	0.10611
0.52531	0.06547	0.48796	0.07593	0.72594	0.10629
0.52591	0.06564	0.47707	0.07615	0.73157	0.10643
0.50989	0.0659	0.48829	0.07632	0.7432	0.10675
0.5293	0.06599	0.49272	0.07646	0.74708	0.10689
0.5309	0.06617	0.48071	0.07672	0.75111	0.10725
0.51574	0.06643	0.49976	0.07681	0.75362	0.10739
0.52976	0.06656	0.49211	0.07712	0.76158	0.10767
0.53751	0.06683	0.48556	0.07725	0.76299	0.10785
0.53062	0.067	0.50029	0.07738	0.76166	0.10799
0.53402	0.06709	0.48722	0.0776	0.7647	0.10826
0.54212	0.0674	0.49589	0.07773	0.76591	0.1084
0.53863	0.06753	0.5074	0.07787	0.76764	0.10858
0.55372	0.06775	0.49486	0.07813	0.77008	0.10891
0.55271	0.06788	0.50257	0.07826	0.77173	0.109
0.54754	0.06805	0.49654	0.07853	0.77597	0.10932
0.55862	0.06827	0.48813	0.07866	0.77946	0.10946
0.55401	0.0684	0.50828	0.07892	0.77955	0.10964
0.54972	0.06867	0.4973	0.07906	0.77817	0.10987
0.56443	0.06884	0.49486	0.07919	0.77753	0.11005
0.55494	0.06906	0.50816	0.07945	0.78126	0.11037
0.56273	0.06919	0.49929	0.07958	0.78367	0.11046
0.56756	0.06933	0.49225	0.07972	0.78596	0.1106
0.55363	0.06955	0.50485	0.08003	0.78876	0.11092
0.56981	0.06968	0.50284	0.08011	0.78943	0.11101
0.56699	0.06985	0.49748	0.08042	0.79699	0.11134
0.5655	0.07007	0.50917	0.08055	0.7995	0.11152
0.5739	0.0702	0.51271	0.08073	0.80317	0.11175
0.56058	0.07051	0.50427	0.08095	0.80496	0.11193
0.56304	0.0706	0.50577	0.08113	0.8059	0.11207
0.57124	0.07086	0.5264	0.08139	0.80975	0.1123
0.56033	0.07104	0.51433	0.08152	0.81293	0.11248
0.55907	0.07117	0.51243	0.08165	0.81329	0.11262
0.56925	0.07139	0.52697	0.08196	0.81278	0.1129
0.56766	0.07156	0.53573	0.0821	0.81645	0.11299
0.56006	0.07169	0.52223	0.08232	0.822	0.11331
0.57811	0.07196	0.53064	0.08249	0.82634	0.11345
0.57321	0.07209	0.53895	0.08262	0.83372	0.11368
0.56373	0.0724	0.52375	0.08284	0.83439	0.11386
0.5812	0.07248	0.53247	0.08302	0.83972	0.114
0.57118	0.07279	0.54625	0.08315	0.84724	0.11423
0.56923	0.07292	0.53186	0.08346	0.85009	0.11436
0.57831	0.07305	0.53314	0.08359	0.85443	0.1145
0.57628	0.07332	0.54945	0.08386	0.85753	0.11473
0.57348	0.07345	0.54695	0.08399	0.8619	0.11487
0.58943	0.07371	0.5389	0.08412	0.86597	0.1151
0.58423	0.07384	0.55745	0.08439	0.86502	0.11523
0.57763	0.07397	0.55098	0.08452	0.8628	0.11546
0.58488	0.07428	0.54888	0.08478	0.86606	0.1156
0.58978	0.07437	0.5587	0.08496	0.87232	0.11574
0.58335	0.07468	0.56216	0.08509	0.8793	0.11592
0.58593	0.07485	0.55488	0.08531	0.88239	0.11606
0.59479	0.07498	0.57042	0.08544	0.88211	0.11634
0.59095	0.07525	0.56869	0.08562	0.88104	0.11643
0.5894	0.07538	0.55955	0.08588	0.88543	0.11652
0.59595	0.07551	0.57727	0.08597	0.89599	0.11679
0.60012	0.07577	0.56771	0.08628	0.89857	0.11689
0.59448	0.07591	0.56483	0.08641	0.89996	0.11712
0.60825	0.07621	0.57212	0.08654	0.9018	0.11725
0.61685	0.07634	0.57172	0.08676	0.89831	0.11735
0.60311	0.07661	0.57158	0.0869	0.90108	0.11757
0.61597	0.07674	0.59259	0.08721	0.9005	0.11767
0.62819	0.07687	0.57615	0.08729	0.90518	0.1179
0.61016	0.07713	0.5892	0.08743	0.90427	0.11799
0.61957	0.07726	0.59739	0.08769	0.90311	0.11812
0.63453	0.0774	0.58429	0.08778	0.90502	0.1184
0.61808	0.07766	0.60473	0.08804	0.90735	0.11845
0.62957	0.07779	0.59118	0.08817	0.90059	0.11872
0.63489	0.07805	0.59362	0.08831	0.90511	0.11886
0.61981	0.07819	0.59523	0.08853	0.90252	0.11895
0.64057	0.07845	0.59412	0.08866	0.90101	0.11918
0.64183	0.07858	0.61481	0.08879	0.8971	0.11932
0.63323	0.07876	0.60136	0.08901	0.90113	0.11955
0.6512	0.07898	0.62005	0.08914	0.90399	0.11968
0.64593	0.07911	0.60683	0.08941	0.90385	0.11982
0.64678	0.07937	0.61329	0.08954	0.89482	0.12001
0.65273	0.0795	0.61626	0.08976	0.89271	0.12014
0.64906	0.07963	0.62305	0.08989	0.89671	0.12042
0.64416	0.0799	0.63868	0.09002	0.90336	0.12056
0.65894	0.07998	0.63233	0.09025	0.90968	0.12083
0.64464	0.08029	0.64173	0.09038	0.9069	0.12097
0.65424	0.08042	0.62296	0.09047	0.90693	0.12111
0.66264	0.08051	0.64553	0.09073	0.90532	0.12129
0.65501	0.08077	0.62707	0.09082	0.90817	0.12143
0.66942	0.08095	0.64991	0.09108	0.91257	0.12161
0.6586	0.08117	0.64264	0.09121	0.91854	0.12184
0.66869	0.0813	0.65582	0.09143	0.9198	0.12198
0.67799	0.08143	0.64101	0.09152	0.92511	0.12221
0.66975	0.08165	0.64066	0.09166	0.9302	0.12234
0.68255	0.08178	0.64833	0.09192	0.93118	0.12244
0.67124	0.08209	0.66278	0.09201	0.94041	0.12271
0.66798	0.08222	0.6641	0.0921	0.9327	0.12285
0.68569	0.08231	0.65684	0.09236	0.9311	0.12312
0.67407	0.08257	0.66994	0.09249	0.93167	0.12322
0.67669	0.0827	0.67289	0.09267	0.93268	0.12331
0.67325	0.08292	0.6661	0.0928	0.93526	0.12358
0.67745	0.08305	0.6567	0.09293	0.93799	0.12372
0.69078	0.08319	0.65762	0.09311	0.93941	0.12395
0.67946	0.08345	0.67578	0.09324	0.93615	0.12409
0.69101	0.08358	0.66056	0.09346	0.93712	0.12423
0.68541	0.08384	0.67867	0.09355	0.93772	0.12446
0.68924	0.08393	0.66691	0.09377	0.94515	0.12459
0.70167	0.08406	0.68251	0.0939	0.94813	0.12487
0.68474	0.08433	0.67026	0.09403	0.94859	0.12496
0.68395	0.0845	0.67634	0.09421	0.94389	0.1251
0.69153	0.08472	0.66207	0.09434	0.93699	0.12537
0.68707	0.08485	0.67297	0.09447	0.93687	0.12546
0.70494	0.08507	0.66809	0.09469	0.94121	0.12574
0.69185	0.08525	0.67699	0.09483	0.94957	0.12588
0.69515	0.08538	0.67517	0.09505	0.9552	0.12602
0.70928	0.08564	0.68987	0.09518	0.96	0.12624
0.69757	0.08573	0.69216	0.09527	0.96527	0.12638
0.71933	0.08599	0.69073	0.09553	0.96885	0.12661
0.71662	0.08617	0.68643	0.09562	0.9718	0.12675
0.70499	0.0863	0.69729	0.09584	0.97459	0.12689
0.72064	0.08652	0.69611	0.09597	0.98043	0.12712
0.71273	0.08665	0.70483	0.09619	0.97981	0.12721
0.70378	0.08678	0.68906	0.09628	0.98433	0.12748
0.72014	0.087	0.69194	0.09641	0.98499	0.12757
0.71277	0.08718	0.69285	0.09663	0.98786	0.12767
0.72563	0.08744	0.708	0.09672	0.98782	0.12794
0.73526	0.08757	0.691	0.09699	0.9898	0.12808
0.71751	0.08766	0.69696	0.09712	0.98961	0.12826
0.7395	0.08792	0.69847	0.09721	0.99474	0.1284
0.73526	0.08805	0.69588	0.09743	0.99355	0.12854
0.74019	0.08827	0.6923	0.09756	0.99668	0.12872
0.7442	0.08845	0.67699	0.09769	0.99577	0.12886
0.73335	0.08858	0.69246	0.09791	0.99493	0.12913
0.73821	0.08884	0.67973	0.09804	0.99386	0.12923
0.73606	0.08893	0.69597	0.09831	0.99507	0.12946
0.73709	0.08919	0.69185	0.09844	0.99591	0.12959
0.75064	0.08933	0.69449	0.0987	1.00015	0.12973
0.7329	0.08941	0.69995	0.09884	1.00182	0.12996
0.75229	0.08968	0.69323	0.09897	1.00318	0.13005
0.74877	0.08985	0.7087	0.09919	1.00307	0.13019
0.74031	0.09007	0.70797	0.09932	1.00436	0.13042
0.74751	0.0902	0.69427	0.09945	1.00502	0.13056
0.74188	0.09033	0.70978	0.09976	1.00606	0.13083
0.74925	0.09055	0.69971	0.09985	1.00746	0.13092
0.7522	0.09073	0.70983	0.10011	1.01377	0.13115
0.73754	0.09099	0.7142	0.10024	1.01296	0.13129
0.74633	0.09112	0.71192	0.10047	1.01251	0.13143
0.75653	0.09121	0.71322	0.1006	1.01219	0.13166
0.74506	0.09152	0.7075	0.10073	1.01482	0.13179
0.75958	0.09165	0.71881	0.10095	1.02261	0.13198
0.75116	0.09187	0.71765	0.10108	1.02513	0.13212
0.75414	0.092	0.71626	0.10139	1.0291	0.13225
0.7657	0.09218	0.73146	0.10148	1.03155	0.13253
0.75587	0.0924	0.72435	0.10161	1.03334	0.13262
0.76378	0.09253	0.72811	0.10187	1.03131	0.13285
0.76927	0.09279	0.73639	0.10201	1.03597	0.13299
0.75908	0.09292	0.73875	0.10223	1.03609	0.13308
0.77258	0.09305	0.74965	0.10236	1.04246	0.13331
0.76554	0.09332	0.73954	0.10249	1.04219	0.13345
0.76335	0.09345	0.74916	0.10271	1.04848	0.13368
0.7805	0.09367	0.74486	0.10284	1.05108	0.13377
0.77241	0.09384	0.72809	0.10298	1.05317	0.1339
0.78729	0.09406	0.74891	0.10324	1.05414	0.13413
0.78001	0.09419	0.73516	0.10328	1.05637	0.13423
0.77128	0.09433	0.75322	0.10359	1.05482	0.1345
0.79026	0.09459	0.73839	0.10368	1.04874	0.13464
0.77657	0.09472	0.76128	0.1039	1.04447	0.13468
0.77814	0.09485	0.74776	0.10403	1.04794	0.13496
0.79299	0.09512	0.74758	0.10417	1.05183	0.1351
0.78318	0.09525	0.76967	0.10443	1.05464	0.13533
0.79566	0.09547	0.75644	0.10452	1.03819	0.13542
0.79752	0.09564	0.77232	0.10465	1.04532	0.13556
0.79458	0.09577	0.75492	0.10491	1.05332	0.13579
0.79513	0.09604	0.76186	0.10505	1.06082	0.13592
0.80148	0.09612	0.7538	0.10527	1.06623	0.1362
0.79315	0.09643	0.77058	0.1054	1.07204	0.13629
0.8029	0.09656	0.77768	0.10553	1.07498	0.13638
0.81238	0.09669	0.77455	0.10575	1.08211	0.13666
0.8058	0.09691	0.78149	0.10588	1.08524	0.13675
0.81556	0.09705	0.76509	0.1061	1.08939	0.13698
0.81444	0.09718	0.78519	0.10624	1.08878	0.13707
0.81492	0.09744	0.76785	0.10632	1.09341	0.1373
0.82083	0.09757	0.78628	0.10659	1.09641	0.13739
0.80827	0.09784	0.78631	0.10672	1.09583	0.13753
0.82409	0.09792	0.78747	0.10694	1.10022	0.13776
0.81058	0.09819	0.78467	0.10707	1.09894	0.13785
0.81135	0.09832	0.77268	0.10721	1.10231	0.13799
0.82855	0.09845	0.7868	0.10747	1.10408	0.13822
0.81398	0.09871	0.77232	0.10756	1.10851	0.13826
0.82735	0.09884	0.78856	0.10769	1.11056	0.13854
0.81615	0.09906	0.78796	0.10795	1.1127	0.13863
0.82995	0.09919	0.7856	0.10809	1.11669	0.13881
0.83196	0.09933	0.78619	0.10831	1.11837	0.13895
0.82172	0.09959	0.78345	0.10844	1.12254	0.13904
0.84103	0.09972	0.79374	0.10857	1.1259	0.13923
0.83183	0.09998	0.79329	0.10884	1.12763	0.13936
0.82283	0.10012	0.79083	0.10892	1.12847	0.13946
0.83938	0.1002	0.7931	0.10914	1.13148	0.13968
0.82293	0.10047	0.80094	0.10928	1.13362	0.13978
0.83016	0.1006	0.81864	0.10941	1.13213	0.14001
0.83899	0.10086	0.79897	0.10967	1.13535	0.1401
0.83281	0.10099	0.82044	0.10976	1.13544	0.14028
0.84569	0.10112	0.81435	0.10989	1.13338	0.14042
0.83573	0.10134	0.81603	0.11016	1.13913	0.14051
0.83903	0.10148	0.82025	0.11029	1.13828	0.14069
0.85534	0.10178	0.82157	0.11051	1.13761	0.14083
0.84364	0.10191	0.82739	0.11064	1.13992	0.14106
0.84884	0.102	0.81299	0.11077	1.13687	0.14111
0.85324	0.10226	0.83066	0.11095	1.13757	0.14124
0.8409	0.1024	0.81989	0.11108	1.12791	0.14147
0.86178	0.10262	0.83407	0.11135	1.1299	0.14161
0.85471	0.10279	0.83271	0.11148	1.12978	0.14179
0.86787	0.10301	0.82489	0.11157	1.1327	0.14193
0.85774	0.10314	0.82929	0.11183	1.13321	0.14202
0.85564	0.10327	0.82632	0.11196	1.14082	0.14225
0.87113	0.10354	0.83285	0.11218	1.14749	0.14234
0.85911	0.10362	0.83043	0.11227	1.14455	0.14262
0.87236	0.10393	0.84893	0.1124	1.15166	0.14267
0.88418	0.10406	0.83915	0.11262	1.15349	0.1428
0.87782	0.10419	0.85498	0.11276	1.1628	0.14303
0.88812	0.10441	0.83643	0.11302	1.16206	0.14317
0.88574	0.10455	0.84819	0.11315	1.16257	0.14335
0.8759	0.10468	0.83705	0.11324	1.16387	0.14345
0.89146	0.1049	0.85744	0.11346	1.16549	0.14358
0.87983	0.10503	0.85678	0.11359	1.16848	0.14377
0.89427	0.10529	0.86094	0.11381	1.16827	0.14386
0.87778	0.10538	0.85897	0.11395	1.17409	0.144
0.88476	0.10551	0.84743	0.11408	1.17526	0.14423
0.89491	0.10577	0.86251	0.11434	1.17973	0.14432
0.88467	0.10591	0.84747	0.11443	1.18251	0.14455
0.90622	0.10612	0.86191	0.11456	1.18139	0.14464
0.88991	0.10626	0.84802	0.11478	1.18361	0.14482
0.91082	0.10648	0.85024	0.11491	1.18358	0.14496
0.89432	0.10661	0.85194	0.11514	1.18498	0.14505
0.89482	0.10674	0.85439	0.11527	1.18893	0.14528
0.90927	0.107	0.85401	0.11549	1.18676	0.14537
0.90229	0.10709	0.86233	0.11562	1.19132	0.14546
0.91364	0.10735	0.86974	0.11575	1.19443	0.14569
0.8979	0.10748	0.859	0.11602	1.19563	0.14579
0.91711	0.10757	0.87729	0.1161	1.19924	0.14602
0.90479	0.10783	0.87269	0.11624	1.19746	0.14611
0.90623	0.10797	0.8799	0.1165	1.19655	0.14629
0.91046	0.10819	0.88521	0.11659	1.19727	0.14643
0.91336	0.10832	0.88724	0.11681	1.19777	0.14652
0.90876	0.10854	0.88596	0.11694	1.1982	0.1467
0.91086	0.10867	0.87389	0.11707	1.19698	0.14684
0.92875	0.1088	0.88784	0.11729	1.19994	0.14707
0.91681	0.10902	0.87857	0.11743	1.19629	0.14716
0.93321	0.10915	0.89821	0.11769	1.19889	0.14725
0.93285	0.10933	0.87949	0.11778	1.20307	0.14748
0.92085	0.10955	0.89753	0.11787	1.20386	0.14762
0.93598	0.10968	0.88565	0.11813	1.21101	0.1478
0.92073	0.1099	0.89048	0.11826	1.21032	0.1479
0.93751	0.11007	0.88745	0.11848	1.21516	0.14803
0.92674	0.11029	0.90573	0.11861	1.21854	0.14822
0.94024	0.11042	0.91023	0.11875	1.21782	0.14835
0.9398	0.11055	0.89348	0.11897	1.2209	0.14858
0.94068	0.11077	0.90988	0.11906	1.22076	0.14863
0.94924	0.1109	0.908	0.11932	1.22783	0.14877
0.93782	0.11104	0.92311	0.11945	1.23042	0.149
0.95289	0.11126	0.90316	0.1195	1.23279	0.14909
0.94798	0.11139	0.91852	0.11976	1.23492	0.14927
0.95152	0.11165	0.90614	0.11989	1.23418	0.14941
0.94807	0.11174	0.91095	0.12007	1.23975	0.1495
0.95811	0.112	0.91452	0.1202	1.24228	0.14968
0.96484	0.11213	0.92932	0.12033	1.2394	0.14982
0.95745	0.11226	0.91177	0.1206	1.24009	0.15001
0.96911	0.11248	0.92888	0.12069	1.2392	0.1501
0.95261	0.11257	0.92058	0.12091	1.24144	0.15019
0.97356	0.11279	0.94038	0.12104	1.24396	0.15042
0.95583	0.11292	0.94202	0.12126	1.24227	0.15051
0.95982	0.11305	0.94128	0.12135	1.24641	0.15074
0.95883	0.11327	0.92831	0.12148	1.24492	0.15083
0.95973	0.1134	0.94579	0.1217	1.25064	0.15097
0.9744	0.11367	0.93196	0.12179	1.2521	0.15115
0.9683	0.11376	0.94654	0.12205	1.25166	0.15124
0.97735	0.11402	0.9394	0.12214	1.25349	0.15143
0.97006	0.11415	0.94041	0.12236	1.25531	0.15157
0.98302	0.11428	0.95821	0.12249	1.25968	0.15166
0.97302	0.11446	0.96496	0.12258	1.26454	0.15189
0.99026	0.11459	0.96872	0.1228	1.26373	0.15198
0.9814	0.11481	0.95247	0.12289	1.27124	0.15221
0.99437	0.11494	0.94704	0.12302	1.27256	0.1523
0.9866	0.11507	0.95661	0.12329	1.27694	0.15248
0.99723	0.11534	0.97166	0.12333	1.28349	0.15257
0.98299	0.11538	0.95877	0.12359	1.28404	0.15271
1.00322	0.11564	0.97417	0.12368	1.2893	0.1529
0.99777	0.11577	0.96273	0.1239	1.29487	0.15299
1.00488	0.11599	0.98065	0.12403	1.29357	0.15308
0.99416	0.11612	0.96533	0.12412	1.29631	0.15326
0.98999	0.11626	0.98074	0.12434	1.2987	0.15335
1.00739	0.11652	0.97577	0.12443	1.30124	0.15354
0.98991	0.11656	0.99505	0.12456	1.30335	0.15368
1.00546	0.11683	0.97842	0.12478	1.30676	0.15381
0.98882	0.11696	0.98921	0.12487	1.30949	0.15395
1.00627	0.11718	0.99578	0.12509	1.30801	0.15404
0.99255	0.11731	0.97673	0.12518	1.3091	0.15418
0.99222	0.11744	0.97935	0.1254	1.31025	0.15432
0.99086	0.11766	0.98003	0.12549	1.31204	0.15441
0.99389	0.11779	0.99952	0.12562	1.31117	0.15459
1.01042	0.11792	0.99465	0.12584	1.30972	0.15468
0.9938	0.11819	0.98663	0.12588	1.31228	0.15487
1.00876	0.11832	1.0055	0.12615	1.31446	0.15496
1.00429	0.11858	0.98745	0.12624	1.31442	0.15514
1.00735	0.11867	1.00068	0.12646	1.31369	0.15528
1.00569	0.11893	0.99902	0.12654	1.31707	0.15537
1.00064	0.11906	1.01771	0.12663	1.3194	0.15556
1.02059	0.11915	1.01899	0.12685	1.3191	0.15565
1.00981	0.11941	0.99821	0.12694	1.32171	0.15583
1.01038	0.11955	1.01611	0.12716	1.32506	0.15592
1.01155	0.11976	1.00265	0.12729	1.32575	0.15602
1.011	0.1199	1.00698	0.12747	1.33348	0.15624
1.02689	0.12007	1.02972	0.1276	1.33702	0.15629
1.02248	0.12033	1.02581	0.12769	1.34129	0.15647
1.02917	0.12042	1.02921	0.12787	1.34457	0.15661
1.0246	0.12069	1.00879	0.128	1.34418	0.15666
1.02102	0.12082	1.01517	0.12822	1.34423	0.15684
1.0348	0.12095	1.01636	0.12831	1.34266	0.15698
1.02553	0.12117	1.01998	0.12848	1.34371	0.15712
1.03565	0.1213	1.03823	0.12861	1.34823	0.15721
1.04663	0.12143	1.03194	0.12884	1.34922	0.15734
1.03943	0.12165	1.02417	0.12888	1.34976	0.15748
1.05302	0.12178	1.0473	0.1291	1.35293	0.15757
1.03628	0.12205	1.03095	0.12923	1.35846	0.1578
1.0519	0.12213	1.03222	0.12941	1.3595	0.1579
1.03732	0.1224	1.05382	0.1295	1.36071	0.15794
1.0451	0.12253	1.03276	0.12958	1.35336	0.15817
1.05904	0.12266	1.05651	0.1298	1.35343	0.15826
1.05037	0.12288	1.03922	0.12989	1.35748	0.15845
1.06254	0.12301	1.03876	0.13011	1.36152	0.15854
1.05376	0.12323	1.0582	0.1302	1.36419	0.15863
1.06727	0.12336	1.06405	0.13038	1.36696	0.15881
1.06332	0.12349	1.0555	0.13051	1.36429	0.1589
1.07079	0.12371	1.05154	0.1306	1.36689	0.15909
1.06818	0.12384	1.05485	0.13077	1.36991	0.15918
1.06333	0.12411	1.07171	0.13086	1.37162	0.15936
1.0631	0.12419	1.07093	0.13108	1.37411	0.15946
1.05894	0.12428	1.05409	0.13117	1.37762	0.15959
1.07194	0.12459	1.06167	0.13135	1.38303	0.15973
1.06456	0.12472	1.06107	0.13148	1.3838	0.15982
1.07862	0.12494	1.06	0.1317	1.38062	0.16001
1.08266	0.12507	1.08095	0.13179	1.38422	0.1601
1.08704	0.12529	1.06421	0.13187	1.38334	0.16019
1.08321	0.12542	1.07887	0.1321	1.38804	0.16042
1.07086	0.12555	1.0678	0.13218	1.39264	0.16046
1.08526	0.12577	1.06771	0.13236	1.3982	0.16065
1.0712	0.1259	1.08516	0.13249	1.39613	0.16074
1.09165	0.12617	1.0655	0.13258	1.39775	0.16083
1.07586	0.12626	1.06938	0.13276	1.40206	0.16102
1.07931	0.12639	1.06971	0.13289	1.40293	0.16111
1.09267	0.12665	1.06978	0.13311	1.4089	0.16129
1.08399	0.12678	1.08643	0.1332	1.41097	0.16138
1.09481	0.127	1.09034	0.13337	1.41273	0.16147
1.08437	0.12713	1.09007	0.13351	1.41265	0.16166
1.10546	0.12735	1.09478	0.13373	1.41569	0.16175
1.08766	0.12748	1.07722	0.13377	1.41962	0.16193
1.08997	0.12762	1.09245	0.1339	1.41922	0.16202
1.10624	0.12788	1.08199	0.13412	1.41841	0.16207
1.09357	0.12797	1.09547	0.13425	1.41769	0.16225
1.10661	0.1281	1.10116	0.13443	1.41713	0.16234
1.09118	0.12836	1.08447	0.13452	1.41813	0.16253
1.11007	0.12845	1.09147	0.13474	1.41625	0.16262
1.09775	0.12871	1.08391	0.13483	1.42338	0.16271
1.10077	0.12884	1.0979	0.13496	1.4261	0.1629
1.0998	0.12906	1.09019	0.13518	1.42366	0.16299
1.10387	0.12919	1.10674	0.13527	1.43176	0.16317
1.12039	0.12933	1.10832	0.13549	1.43423	0.16322
1.1124	0.12955	1.09415	0.13558	1.4325	0.16331
1.13008	0.12968	1.10659	0.13571	1.43538	0.16354
1.11205	0.12994	1.09678	0.13593	1.43898	0.16363
1.13149	0.13003	1.11452	0.13602	1.44052	0.16377
1.12726	0.13016	1.11186	0.13624	1.43847	0.16386
1.12938	0.13042	1.12297	0.13632	1.44013	0.16404
1.12668	0.13051	1.10839	0.13646	1.44237	0.16413
1.13243	0.13077	1.11378	0.13663	1.44354	0.16423
1.13828	0.13091	1.13057	0.13672	1.44791	0.16441
1.1402	0.13112	1.11457	0.13694	1.45205	0.16446
1.14309	0.13121	1.13533	0.13707	1.45283	0.16455
1.12548	0.13134	1.11948	0.13712	1.45358	0.16478
1.14687	0.13156	1.12315	0.13734	1.45395	0.16482
1.13164	0.13169	1.12404	0.13747	1.45466	0.16501
1.13504	0.13183	1.12893	0.13765	1.45827	0.1651
1.13146	0.13205	1.14142	0.13773	1.45766	0.16528
1.14397	0.13218	1.14664	0.13795	1.45262	0.16537
1.14487	0.13244	1.12913	0.138	1.45054	0.16546
1.143	0.13257	1.13415	0.13822	1.44828	0.1656
1.1476	0.13279	1.1346	0.13835	1.44527	0.16569
1.14662	0.13288	1.15191	0.13844	1.44833	0.16583
1.16244	0.13301	1.15231	0.13862	1.45097	0.16602
1.14972	0.13323	1.1374	0.13875	1.44983	0.16606
1.1676	0.13336	1.15462	0.13897	1.45554	0.16629
1.15927	0.13358	1.14346	0.13906	1.45706	0.16638
1.16858	0.13371	1.16047	0.13914	1.4601	0.16657
1.15549	0.13384	1.16402	0.13936	1.46129	0.16666
1.17519	0.13406	1.14811	0.13945	1.46327	0.16675
1.16168	0.13415	1.15326	0.13963	1.46564	0.16698
1.18548	0.13441	1.15921	0.13976	1.46775	0.16702
1.16729	0.13455	1.15391	0.13994	1.47417	0.16712
1.18092	0.13472	1.16555	0.14002	1.47946	0.16734
1.17315	0.13485	1.15448	0.14011	1.48279	0.16744
1.18598	0.13498	1.15606	0.14033	1.48373	0.16757
1.17912	0.13516	1.15988	0.14047	1.48674	0.16767
1.19314	0.13529	1.16705	0.14064	1.48828	0.16776
1.18374	0.13555	1.18421	0.14073	1.48656	0.16794
1.19891	0.1356	1.16762	0.14086	1.48776	0.16803
1.19805	0.13586	1.16887	0.14104	1.49112	0.16822
1.19976	0.13595	1.18518	0.14113	1.4891	0.16831
1.20418	0.13617	1.17276	0.14135	1.48941	0.1684
1.18567	0.13626	1.19567	0.14148	1.48946	0.16858
1.20637	0.13652	1.1787	0.14157	1.49211	0.16868
1.18679	0.13661	1.182	0.14174	1.49731	0.16886
1.20642	0.13674	1.19245	0.14187	1.49918	0.16895
1.19628	0.13696	1.20259	0.14201	1.49746	0.16904
1.21391	0.13705	1.19581	0.14214	1.50118	0.16923
1.20103	0.13726	1.20068	0.14232	1.50367	0.16932
1.21519	0.1374	1.18521	0.14245	1.50615	0.1695
1.21785	0.13757	1.20148	0.14249	1.50679	0.16955
1.21599	0.1377	1.19934	0.14271	1.50931	0.16964
1.20366	0.13783	1.19422	0.14284	1.51369	0.16987
1.20651	0.13805	1.18625	0.14293	1.5129	0.16996
1.20842	0.13814	1.18733	0.14311	1.51654	0.1701
1.21597	0.13841	1.20289	0.1432	1.51964	0.17019
1.20706	0.13849	1.20749	0.14342	1.52287	0.17037
1.20687	0.13871	1.18977	0.1435	1.52353	0.17046
1.22694	0.1388	1.20422	0.14373	1.52377	0.17056
1.21626	0.13902	1.19585	0.14381	1.52706	0.17074
1.23218	0.13915	1.19968	0.14399	1.52613	0.17079
1.21647	0.13941	1.21513	0.14408	1.52538	0.17092
1.23584	0.13946	1.22032	0.1443	1.52432	0.17111
1.22857	0.13972	1.20201	0.14439	1.52441	0.17115
1.24038	0.13985	1.20754	0.14461	1.52986	0.17134
1.2238	0.13994	1.20647	0.14469	1.53334	0.17143
1.23463	0.14016	1.22255	0.14483	1.53601	0.17161
1.22604	0.14025	1.22186	0.145	1.53874	0.1717
1.23288	0.14047	1.2078	0.14509	1.53893	0.17179
1.24469	0.1406	1.22702	0.14531	1.54131	0.17198
1.23885	0.14082	1.21187	0.14544	1.54378	0.17207
1.25196	0.14095	1.2275	0.14549	1.54294	0.17216
1.23831	0.14099	1.23292	0.14571	1.54149	0.17234
1.25808	0.14126	1.2334	0.14584	1.54275	0.17239
1.24779	0.14134	1.23437	0.14602	1.5426	0.17262
1.25648	0.14156	1.2182	0.1461	1.54117	0.17271
1.24933	0.14165	1.23654	0.14624	1.54843	0.17285
1.25092	0.14187	1.22711	0.14646	1.55172	0.17294
1.262	0.142	1.2261	0.1465	1.55375	0.17303
1.25942	0.14218	1.24762	0.14672	1.55525	0.17322
1.27034	0.14226	1.23665	0.14685	1.55699	0.17331
1.26947	0.14253	1.24011	0.14703	1.55727	0.17349
1.27562	0.14262	1.25637	0.14712	1.55527	0.17358
1.26442	0.1427	1.24858	0.14725	1.55601	0.17368
1.26501	0.14292	1.26177	0.14743	1.55957	0.17386
1.2745	0.14305	1.25135	0.14751	1.55981	0.17395
1.26844	0.14323	1.25445	0.14769	1.56294	0.17413
1.28428	0.14336	1.27596	0.14782	1.5653	0.17423
1.26798	0.14358	1.258	0.14791	1.56465	0.17432
1.27829	0.14367	1.25755	0.14809	1.56209	0.17446
1.27155	0.14376	1.27694	0.14817	1.56395	0.17459
1.28279	0.14402	1.26034	0.14839	1.5686	0.17478
1.29258	0.14406	1.26914	0.14848	1.57038	0.17482
1.27363	0.14433	1.26237	0.14857	1.57129	0.17491
1.29466	0.14441	1.26146	0.14879	1.5782	0.17514
1.28429	0.14463	1.28112	0.14888	1.58057	0.17519
1.29771	0.14476	1.28544	0.14906	1.58569	0.17537
1.27884	0.14485	1.26681	0.14914	1.58759	0.17546
1.2898	0.14507	1.2815	0.14928	1.59096	0.1756
1.28472	0.14516	1.2841	0.14945	1.59535	0.17574
1.30117	0.14542	1.28769	0.14954	1.59623	0.17583
1.29604	0.14551	1.27385	0.14963	1.60197	0.17597
1.30634	0.1456	1.27898	0.14985	1.60303	0.17606
1.29686	0.14586	1.29902	0.14989	1.60296	0.17615
1.29711	0.14595	1.29993	0.15011	1.60303	0.17634
1.31384	0.14617	1.28284	0.1502	1.60603	0.17643
1.31142	0.1463	1.28117	0.15038	1.60752	0.17661
1.32425	0.14648	1.2846	0.15051	1.60576	0.1767
1.30473	0.14661	1.30067	0.1506	1.60259	0.17684
1.3266	0.14669	1.30069	0.15082	1.60334	0.17693
1.31578	0.14691	1.28628	0.15091	1.60697	0.17702
1.32874	0.147	1.30227	0.15099	1.60981	0.17721
1.32604	0.14726	1.28805	0.15121	1.60876	0.1773
1.33896	0.14735	1.30725	0.1513	1.61079	0.17739
1.324	0.14744	1.31182	0.15148	1.60887	0.17753
1.32619	0.14766	1.29376	0.15161	1.60725	0.17762
1.32871	0.14779	1.31414	0.1517	1.61	0.17785
1.32666	0.14797	1.3147	0.15188	1.61387	0.17794
1.34334	0.1481	1.29893	0.15196	1.62192	0.17808
1.32981	0.14819	1.31592	0.15218	1.62344	0.17817
1.3346	0.14836	1.30392	0.15232	1.6261	0.17826
1.33444	0.14849	1.32245	0.15236	1.62961	0.17845
1.33229	0.14867	1.32327	0.15258	1.6302	0.17854
1.35133	0.1488	1.30586	0.15267	1.63292	0.17863
1.33428	0.14889	1.30921	0.15284	1.6365	0.17877
1.35224	0.14911	1.31425	0.15298	1.64261	0.17886
1.33646	0.14919	1.32586	0.15306	1.6459	0.17904
1.33767	0.14941	1.32439	0.15329	1.64564	0.17913
1.34329	0.14955	1.30678	0.15333	1.64938	0.17927
1.34623	0.14972	1.33026	0.15346	1.65163	0.17936
1.36349	0.14985	1.3134	0.15368	1.65169	0.17946
1.3464	0.14994	1.32842	0.15377	1.65476	0.17964
1.36001	0.15016	1.33112	0.15395	1.65715	0.17973
1.35436	0.15025	1.31286	0.15408	1.65878	0.17987
1.37272	0.15038	1.33702	0.15417	1.66316	0.17996
1.37334	0.15055	1.31978	0.15439	1.66396	0.18005
1.3589	0.15069	1.33567	0.15447	1.66331	0.18019
1.37717	0.1509	1.34589	0.15469	1.66548	0.18028
1.35878	0.15095	1.32656	0.15478	1.6673	0.18046
1.37035	0.15121	1.34257	0.15491	1.67005	0.18056
1.3683	0.1513	1.34408	0.15509	1.67057	0.1806
1.38381	0.15143	1.35219	0.15518	1.67259	0.18079
1.38567	0.15161	1.3367	0.15527	1.67326	0.18088
1.36967	0.15169	1.33112	0.15549	1.67539	0.18101
1.37822	0.15191	1.34272	0.15558	1.67534	0.18111
1.37815	0.152	1.33295	0.1558	1.67297	0.1812
1.39407	0.15213	1.3425	0.15588	1.6718	0.18134
1.39879	0.15231	1.33134	0.15602	1.67183	0.18143
1.38236	0.1524	1.33015	0.15619	1.67524	0.18161
1.40247	0.15262	1.35261	0.15628	1.67659	0.1817
1.3862	0.15275	1.33811	0.1565	1.67946	0.18175
1.40492	0.15279	1.36001	0.15659	1.6755	0.18193
1.40943	0.15301	1.34729	0.15672	1.67535	0.18202
1.40661	0.15314	1.35774	0.15694	1.67552	0.18216
1.41242	0.15332	1.3699	0.15699	1.67731	0.18225
1.40156	0.1534	1.35101	0.15721	1.67538	0.18239
1.40216	0.15358	1.37039	0.15729	1.67729	0.18257
1.42162	0.15371	1.35384	0.15743	1.67833	0.18262
1.40552	0.1538	1.35445	0.1576	1.67945	0.1828
1.40639	0.15398	1.37208	0.15769	1.67666	0.1829
1.42096	0.15411	1.35939	0.15791	1.66995	0.18299
1.41885	0.15428	1.37992	0.158	1.66246	0.18317
1.43821	0.15441	1.36142	0.15809	1.6653	0.18326
1.41798	0.15446	1.36154	0.15831	1.66761	0.18335
1.41939	0.15468	1.36568	0.15844	1.67092	0.18354
1.43647	0.15476	1.36755	0.15861	1.67096	0.18368
1.43485	0.15494	1.38054	0.1587	1.67171	0.18386
1.43321	0.15507	1.36568	0.15884	1.67064	0.18395
1.43509	0.15525	1.36617	0.15901	1.67637	0.18413
1.43076	0.15534	1.38076	0.15914	1.6798	0.18427
1.44975	0.15542	1.38558	0.15923	1.68497	0.18436
1.45163	0.15564	1.39724	0.15945	1.69139	0.18455
1.43432	0.15569	1.38219	0.15954	1.69372	0.18464
1.45128	0.15582	1.38484	0.15972	1.69661	0.18473
1.44487	0.15604	1.38242	0.15985	1.69963	0.18491
1.43472	0.15608	1.3869	0.16002	1.6998	0.18501
1.45837	0.1563	1.40264	0.16011	1.70279	0.18519
1.44476	0.15639	1.38809	0.16025	1.70392	0.18528
1.44727	0.15656	1.40212	0.16047	1.7055	0.18546
1.46625	0.15665	1.40867	0.16051	1.70745	0.18556
1.45142	0.15678	1.40275	0.16064	1.71015	0.18565
1.45148	0.15691	1.41086	0.16086	1.71154	0.18583
1.46573	0.15705	1.39817	0.16095	1.71118	0.18592
1.44844	0.15713	1.39935	0.16113	1.71316	0.18606
1.46714	0.15735	1.41878	0.16121	1.71726	0.1862
1.47258	0.1574	1.41485	0.16135	1.71655	0.18629
1.45795	0.15762	1.41507	0.16152	1.7169	0.18647
1.47456	0.1577	1.4018	0.16161	1.71698	0.18657
1.47803	0.15788	1.41042	0.16183	1.72129	0.18675
1.46158	0.15797	1.42833	0.16192	1.72205	0.18684
1.47854	0.1581	1.4147	0.16201	1.72694	0.18689
1.48419	0.15827	1.43351	0.16223	1.73482	0.18712
1.4655	0.15836	1.41867	0.16232	1.73573	0.18721
1.48065	0.15858	1.42057	0.16249	1.73963	0.18734
1.48578	0.15862	1.43852	0.16262	1.74111	0.18744
1.47302	0.15871	1.42477	0.16271	1.73964	0.18753
1.49115	0.15893	1.43649	0.16293	1.73783	0.18771
1.47725	0.15902	1.44371	0.16298	1.74129	0.1878
1.47794	0.15919	1.4309	0.1632	1.73814	0.18799
1.49821	0.15933	1.4422	0.16329	1.73769	0.18808
1.47623	0.15941	1.42548	0.16342	1.74215	0.18817
1.47869	0.15959	1.42771	0.16359	1.74242	0.18835
1.49986	0.15968	1.44504	0.16368	1.74566	0.18845
1.49888	0.15985	1.4396	0.16381	1.74753	0.18863
1.4854	0.15994	1.44375	0.16399	1.75121	0.18872
1.49374	0.16007	1.43582	0.16408	1.75201	0.18881
1.49849	0.16025	1.43573	0.1643	1.75437	0.18895
1.50393	0.16034	1.45909	0.16439	1.75659	0.18909
1.50993	0.16051	1.44048	0.16447	1.75894	0.18927
1.48927	0.16064	1.4547	0.16469	1.76233	0.18932
1.49394	0.16082	1.45079	0.16478	1.76313	0.18941
1.51219	0.16091	1.45684	0.16496	1.76931	0.18959
1.49645	0.16099	1.47328	0.16505	1.77283	0.18968
1.49565	0.16117	1.45619	0.16518	1.77963	0.18987
1.51294	0.16126	1.45987	0.16536	1.78037	0.18996
1.51425	0.16139	1.48278	0.16544	1.78651	0.1901
1.5188	0.16156	1.48402	0.16562	1.78989	0.19019
1.50272	0.16165	1.48415	0.16575	1.79237	0.19028
1.50781	0.16187	1.47151	0.16584	1.79799	0.19046
1.52379	0.16191	1.4808	0.16602	1.79949	0.19051
1.52546	0.16213	1.4917	0.1661	1.80361	0.19069
1.51051	0.16222	1.49468	0.16628	1.80689	0.19079
1.51452	0.16235	1.47832	0.16637	1.8054	0.19083
1.52417	0.16253	1.49366	0.16646	1.80683	0.19101
1.53373	0.16262	1.49776	0.16668	1.80746	0.19111
1.53248	0.16279	1.47687	0.16677	1.81223	0.19124
1.51568	0.16288	1.48055	0.16694	1.81479	0.19134
1.53292	0.16301	1.50032	0.16703	1.8147	0.19143
1.54015	0.16319	1.48377	0.16712	1.8173	0.19157
1.519	0.16327	1.48788	0.16729	1.818	0.19166
1.53014	0.16349	1.50708	0.16738	1.81748	0.19179
1.52858	0.16358	1.50009	0.16751	1.81971	0.19189
1.52497	0.16362	1.50834	0.16769	1.81989	0.19193
1.54695	0.16384	1.49747	0.16778	1.82562	0.19212
1.527	0.16393	1.49769	0.16795	1.82838	0.19221
1.52912	0.16411	1.51293	0.16804	1.83176	0.19234
1.55069	0.16424	1.51508	0.16822	1.83257	0.19244
1.53504	0.16433	1.49952	0.16831	1.83259	0.19253
1.53391	0.1645	1.52195	0.16844	1.83259	0.19267
1.55475	0.16459	1.51451	0.16861	1.83297	0.19276
1.54099	0.16481	1.50165	0.1687	1.83873	0.1929
1.5478	0.1649	1.51752	0.16879	1.84164	0.19299
1.55526	0.16507	1.50969	0.16901	1.84089	0.19303
1.54229	0.1652	1.51544	0.1691	1.84526	0.19322
1.56397	0.16525	1.51682	0.16928	1.84538	0.19331
1.56559	0.16547	1.50777	0.16936	1.84772	0.19345
1.55082	0.16555	1.52148	0.16945	1.85082	0.19354
1.55277	0.16573	1.52861	0.16963	1.85146	0.19358
1.56002	0.16586	1.51181	0.16976	1.85362	0.19377
1.57319	0.16595	1.51538	0.16994	1.85646	0.19381
1.57332	0.16617	1.52223	0.17007	1.86246	0.194
1.55921	0.16621	1.5141	0.17011	1.86367	0.19404
1.57593	0.16634	1.52936	0.17033	1.86076	0.19413
1.57789	0.16652	1.52086	0.17042	1.85898	0.19427
1.5675	0.16665	1.52166	0.1706	1.85967	0.19436
1.56188	0.16678	1.53697	0.17069	1.86507	0.1945
1.56867	0.16691	1.52293	0.17082	1.86718	0.19459
1.58374	0.167	1.51819	0.17099	1.86675	0.19473
1.58301	0.16718	1.54248	0.17108	1.86757	0.19482
1.57102	0.16726	1.5424	0.17126	1.86819	0.19491
1.57721	0.16748	1.54179	0.17139	1.87211	0.19505
1.59419	0.16757	1.53488	0.17148	1.87529	0.1951
1.57642	0.16766	1.53821	0.17165	1.87673	0.19519
1.5873	0.16788	1.55575	0.17174	1.87766	0.19537
1.60065	0.16792	1.53472	0.17188	1.87655	0.19542
1.58592	0.16814	1.54211	0.17201	1.88043	0.1956
1.59738	0.16823	1.56276	0.17214	1.8818	0.19565
1.60455	0.16841	1.56602	0.17232	1.88275	0.19579
1.5889	0.16849	1.55436	0.1724	1.88312	0.19588
1.60119	0.16862	1.57004	0.17249	1.88206	0.19597
1.60706	0.16876	1.57001	0.17267	1.88725	0.19611
1.59126	0.16889	1.56962	0.1728	1.88862	0.1962
1.59517	0.16906	1.56215	0.17293	1.89343	0.19629
1.61248	0.16915	1.56493	0.17306	1.89753	0.19643
1.59794	0.16924	1.57693	0.17315	1.89744	0.19652
1.61421	0.16946	1.58339	0.17333	1.89871	0.19666
1.60032	0.16955	1.57167	0.17342	1.89712	0.19675
1.6047	0.16972	1.57591	0.17359	1.8972	0.19689
1.62237	0.16981	1.59121	0.17368	1.89986	0.19698
1.62754	0.16998	1.57334	0.17377	1.90194	0.19702
1.61179	0.17007	1.5785	0.17395	1.90516	0.19716
1.63085	0.1702	1.59702	0.17403	1.90389	0.19725
1.63287	0.17038	1.59548	0.17421	1.90299	0.19734
1.61886	0.17047	1.57976	0.1743	1.90173	0.19748
1.64067	0.17055	1.59886	0.17439	1.89931	0.19757
1.63559	0.17073	1.60175	0.17461	1.89761	0.19776
1.62621	0.17082	1.58265	0.17465	1.89411	0.1978
1.63135	0.17099	1.58381	0.17483	1.89408	0.19799
1.63388	0.17112	1.5979	0.17496	1.89576	0.19808
1.64545	0.17126	1.57973	0.17505	1.89576	0.19817
1.64249	0.17139	1.58863	0.17522	1.90028	0.19831
1.63385	0.17148	1.6067	0.17531	1.90139	0.1984
1.64378	0.17165	1.58995	0.1754	1.90503	0.19854
1.64169	0.17183	1.59539	0.17558	1.90749	0.19863
1.64473	0.17218	1.61297	0.17566	1.90703	0.19872
1.64897	0.17253	1.61244	0.17584	1.91166	0.1989
1.65238	0.1727	1.60717	0.17597	1.91183	0.199
1.65379	0.17288	1.60002	0.1761	1.91473	0.19918
1.67276	0.17297	1.6169	0.17619	1.91647	0.19927
1.67054	0.17314	1.6161	0.17632	1.91739	0.19936
1.65678	0.17323	1.61168	0.17646	1.91629	0.1995
1.67723	0.17332	1.62613	0.17654	1.91809	0.19959
1.68601	0.17354	1.62297	0.17668	1.91879	0.19968
1.66834	0.17358	1.62707	0.17685	1.92176	0.19982
1.67123	0.17376	1.62594	0.1769	1.92354	0.19991
1.69021	0.17389	1.61652	0.17712	1.92485	0.2001
1.67529	0.17393	1.63535	0.17721	1.92562	0.20019
1.67555	0.17411	1.6203	0.17729	1.92608	0.20033
1.68903	0.17419	1.62798	0.17747	1.92287	0.20042
1.69177	0.17437	1.64464	0.17756	1.92414	0.20051
1.67928	0.17446	1.64709	0.17773	1.92352	0.20069
1.69538	0.17455	1.63721	0.17782	1.92392	0.20079
1.69613	0.17472	1.64228	0.17791	1.9275	0.20088
1.68433	0.17481	1.64808	0.17809	1.9301	0.20106
1.68706	0.17498	1.63368	0.17817	1.92899	0.20111
1.69688	0.17507	1.64192	0.17835	1.9309	0.20129
1.69896	0.17525	1.64871	0.17844	1.93029	0.20138
1.70533	0.1756	1.63507	0.17853	1.932	0.20157
1.70852	0.17595	1.63485	0.1787	1.93373	0.20166
1.71516	0.1763	1.64545	0.17879	1.93738	0.20175
1.71802	0.17648	1.63273	0.17888	1.93962	0.20193
1.70576	0.17661	1.63487	0.17906	1.94273	0.20202
1.72342	0.17665	1.654	0.17914	1.94711	0.20212
1.72642	0.17683	1.66089	0.17932	1.95439	0.2023
1.71078	0.17691	1.64607	0.17941	1.95758	0.20234
1.71437	0.17709	1.64881	0.17958	1.96042	0.20253
1.73374	0.17718	1.66507	0.17967	1.96104	0.20262
1.72285	0.17726	1.65078	0.17976	1.96553	0.20276
1.72589	0.17744	1.65783	0.17998	1.97064	0.20285
1.73995	0.17753	1.67459	0.18002	1.97383	0.20294
1.7404	0.1777	1.66516	0.18011	1.97847	0.20308
1.73596	0.17775	1.6658	0.18029	1.97829	0.20317
1.73602	0.17788	1.68633	0.18038	1.98214	0.20326
1.74151	0.17805	1.68913	0.18055	1.98399	0.2034
1.73153	0.17814	1.67422	0.18064	1.97901	0.20349
1.74443	0.17827	1.68699	0.18073	1.98482	0.20368
1.73939	0.17836	1.69342	0.18091	1.98976	0.20377
1.73879	0.17854	1.68484	0.18099	1.99455	0.2039
1.75874	0.17862	1.69146	0.18117	2.00005	0.20395
1.74091	0.17871	1.70399	0.18126	2.0041	0.20404
1.74548	0.17889	1.7075	0.1813	2.00866	0.20418
1.76039	0.17898	1.70685	0.18148	2.01204	0.20427
1.74133	0.17906	1.68933	0.18157	2.01707	0.20441
1.74315	0.17924	1.7094	0.18165	2.01883	0.2045
1.7578	0.17928	1.70792	0.18179	2.02131	0.20455
1.76257	0.1795	1.69337	0.18188	2.02108	0.20473
1.74519	0.17959	1.70306	0.18205	2.02284	0.20478
1.74901	0.17972	1.72188	0.18214	2.02918	0.20491
1.77092	0.17981	1.72201	0.18232	2.03039	0.20501
1.75202	0.17994	1.70706	0.1824	2.03245	0.20505
1.75957	0.18007	1.71969	0.18249	2.03199	0.20519
1.77347	0.18016	1.70615	0.18262	2.03372	0.20528
1.7599	0.18025	1.72143	0.18271	2.0347	0.20542
1.76317	0.18042	1.70534	0.1828	2.03493	0.20546
1.77901	0.18051	1.70783	0.18293	2.03456	0.20556
1.78134	0.18069	1.72726	0.18302	2.03442	0.20569
1.7702	0.18077	1.73725	0.1832	2.03619	0.20574
1.7739	0.18095	1.71892	0.18329	2.04034	0.20592
1.78228	0.18104	1.73349	0.18337	2.04315	0.20597
1.77431	0.18112	1.73712	0.18355	2.04382	0.20601
1.78563	0.18126	1.72891	0.18364	2.04837	0.2062
1.7751	0.18134	1.74305	0.18377	2.04768	0.20624
1.78037	0.18148	1.72604	0.18386	2.04618	0.20638
1.77833	0.18165	1.74876	0.18395	2.04578	0.20647
1.77626	0.18169	1.74798	0.18412	2.04721	0.20657
1.78438	0.18187	1.7333	0.18421	2.04828	0.20666
1.79337	0.18196	1.73829	0.18434	2.05214	0.20675
1.80096	0.18213	1.75298	0.18443	2.05811	0.20689
1.78498	0.18222	1.74012	0.18452	2.05916	0.20698
1.80277	0.18231	1.76574	0.18465	2.06454	0.20712
1.80454	0.18248	1.74751	0.18474	2.06275	0.20721
1.78865	0.18257	1.76658	0.18483	2.0626	0.20725
1.78784	0.18275	1.76442	0.185	2.06201	0.20739
1.80906	0.18279	1.74725	0.18505	2.06346	0.20748
1.7925	0.18288	1.74576	0.18522	2.06148	0.20753
1.79924	0.1831	1.76294	0.18531	2.06411	0.20767
1.81791	0.18319	1.75035	0.18544	2.06521	0.20776
1.82111	0.18332	1.77024	0.18553	2.06902	0.2079
1.80431	0.1834	1.75056	0.18562	2.06712	0.20794
1.82101	0.18349	1.74696	0.1858	2.06766	0.20813
1.82258	0.18367	1.76153	0.18584	2.07042	0.20822
1.81109	0.18376	1.7436	0.18593	2.07187	0.20826
1.82654	0.18389	1.74904	0.1861	2.07437	0.2084
1.82081	0.18398	1.76757	0.18619	2.07731	0.20849
1.82533	0.18406	1.76333	0.18637	2.08057	0.20863
1.82576	0.18428	1.75059	0.18646	2.08265	0.20868
1.81789	0.18433	1.762	0.18654	2.0831	0.20877
1.81572	0.1845	1.76856	0.18672	2.08637	0.20895
1.83685	0.18459	1.77041	0.18676	2.08785	0.209
1.82361	0.18468	1.76741	0.18685	2.09311	0.20913
1.82808	0.18485	1.77921	0.18707	2.09306	0.20923
1.84797	0.18494	1.77459	0.18716	2.09264	0.20927
1.84911	0.18512	1.78991	0.18729	2.09465	0.20941
1.8353	0.18516	1.77453	0.18738	2.09469	0.2095
1.85086	0.18525	1.79662	0.18747	2.09949	0.20964
1.85246	0.18542	1.80195	0.18765	2.10104	0.20968
1.84286	0.18547	1.78553	0.18773	2.10283	0.20978
1.84079	0.18569	1.79231	0.18787	2.10479	0.20991
1.84972	0.18577	1.80705	0.18795	2.10684	0.20996
1.84193	0.1859	1.79331	0.18804	2.1087	0.21014
1.85587	0.18599	1.80582	0.18817	2.1101	0.21019
1.83972	0.18608	1.79113	0.18826	2.11254	0.21024
1.84301	0.18621	1.81055	0.18835	2.11632	0.21042
1.86099	0.1863	1.80894	0.18853	2.11441	0.21046
1.84575	0.18639	1.79427	0.18857	2.11729	0.2106
1.8507	0.18661	1.79715	0.18875	2.11755	0.21069
1.86731	0.18665	1.81163	0.18884	2.12005	0.21074
1.87581	0.18683	1.80009	0.18892	2.12116	0.21088
1.86214	0.18691	1.82379	0.18906	2.12252	0.21097
1.87165	0.18705	1.81143	0.18914	2.12555	0.21111
1.86884	0.18713	1.81715	0.18928	2.12499	0.21115
1.87626	0.18722	1.83371	0.18936	2.12623	0.21124
1.88136	0.1874	1.8204	0.18945	2.12959	0.21138
1.85994	0.18748	1.82444	0.18963	2.13129	0.21147
1.88227	0.18757	1.81755	0.18967	2.13446	0.21161
1.88424	0.1877	1.8195	0.1898	2.13744	0.21166
1.87076	0.18779	1.83599	0.18989	2.13931	0.21179
1.87216	0.18797	1.83219	0.19003	2.14304	0.21189
1.89294	0.18805	1.83908	0.19011	2.14302	0.21193
1.88288	0.18819	1.8322	0.1902	2.14995	0.21212
1.89184	0.18827	1.83515	0.19033	2.15236	0.21216
1.88506	0.18836	1.85134	0.19042	2.15781	0.21221
1.88271	0.18849	1.83981	0.19051	2.16162	0.21235
1.90152	0.18858	1.84452	0.19069	2.16307	0.21239
1.90665	0.18876	1.84103	0.19073	2.16746	0.21253
1.89324	0.18884	1.84821	0.19086	2.17223	0.21262
1.90345	0.18893	1.87138	0.19095	2.17504	0.21271
1.9057	0.18911	1.85381	0.19104	2.17678	0.2128
1.90953	0.18915	1.87171	0.19117	2.17564	0.21285
1.91437	0.18933	1.85264	0.19126	2.17941	0.21299
1.89871	0.18941	1.85848	0.19139	2.18057	0.21303
1.91705	0.18946	1.86446	0.19143	2.18262	0.21317
1.92155	0.18963	1.86936	0.19152	2.18325	0.21322
1.90764	0.18972	1.88022	0.1917	2.18394	0.21326
1.92562	0.18985	1.85977	0.19174	2.18387	0.2134
1.90539	0.18994	1.87646	0.19187	2.18508	0.21349
1.92975	0.19003	1.87092	0.19196	2.18662	0.21358
1.92611	0.1902	1.88352	0.19205	2.18794	0.21368
1.90992	0.19025	1.8778	0.19218	2.18738	0.21372
1.91484	0.19042	1.87062	0.19223	2.19115	0.21386
1.93045	0.19051	1.87361	0.1924	2.19297	0.21391
1.92033	0.1906	1.86169	0.19249	2.19646	0.21404
1.93669	0.19073	1.87844	0.19254	2.19724	0.21409
1.9225	0.19082	1.88376	0.19271	2.2014	0.21413
1.94152	0.19091	1.87049	0.1928	2.20327	0.21427
1.94047	0.19104	1.88722	0.19293	2.20318	0.21436
1.92575	0.19112	1.86772	0.19302	2.20399	0.21446
1.93199	0.1913	1.889	0.19311	2.20154	0.21455
1.93055	0.19134	1.89052	0.19324	2.20259	0.21459
1.93707	0.19152	1.88096	0.19333	2.20274	0.21473
1.9547	0.19161	1.8827	0.19337	2.2035	0.21478
1.9395	0.19165	1.88003	0.19355	2.2068	0.21491
1.94695	0.19183	1.89571	0.19364	2.20734	0.21496
1.95176	0.19187	1.90365	0.19377	2.20791	0.21505
1.94818	0.19205	1.8855	0.19386	2.21329	0.21519
1.96444	0.19209	1.90186	0.19395	2.21345	0.21524
1.9527	0.19218	1.89775	0.19408	2.21789	0.21537
1.96451	0.19231	1.90852	0.19417	2.21963	0.21542
1.95981	0.1924	1.90908	0.1943	2.22437	0.21556
1.95621	0.19257	1.8982	0.19439	2.22422	0.2156
1.97448	0.19266	1.91373	0.19447	2.22817	0.21569
1.95452	0.1927	1.90444	0.19461	2.22991	0.21579
1.96078	0.19288	1.92766	0.19469	2.23102	0.21588
1.96373	0.19292	1.91283	0.19474	2.23089	0.21592
1.95941	0.19305	1.90803	0.19491	2.23357	0.21606
1.97931	0.19314	1.91136	0.19496	2.23339	0.21611
1.97179	0.19327	1.90381	0.19514	2.23591	0.21624
1.97469	0.19336	1.92412	0.19518	2.23597	0.21629
1.97108	0.19345	1.9102	0.19527	2.23818	0.21643
1.96766	0.19358	1.92581	0.1954	2.23814	0.21647
1.98403	0.19367	1.92006	0.19549	2.23996	0.21657
1.98797	0.19384	1.94085	0.19558	2.24329	0.21666
1.97238	0.19393	1.94228	0.19571	2.2453	0.21675
1.97648	0.19398	1.93419	0.19575	2.24655	0.21679
1.97911	0.19415	1.93871	0.19593	2.2492	0.21693
1.99629	0.19424	1.91985	0.19602	2.25386	0.21698
1.99677	0.19437	1.91937	0.19615	2.25517	0.21712
1.98572	0.19446	1.93628	0.19624	2.25801	0.21716
2.00221	0.19459	1.93512	0.19628	2.25975	0.2173
1.9859	0.19463	1.94738	0.19641	2.26242	0.21735
2.00665	0.19472	1.93257	0.1965	2.2626	0.21744
2.00421	0.1949	1.94978	0.19659	2.2647	0.21753
2.00055	0.19494	1.95114	0.19676	2.26562	0.21757
1.99537	0.19503	1.94789	0.19681	2.26753	0.21767
1.99252	0.1952	1.956	0.19694	2.26722	0.21776
2.01224	0.19529	1.93922	0.19703	2.26887	0.21785
2.01025	0.19592	1.95964	0.19712	2.27154	0.21799
1.99942	0.19601	1.94389	0.19725	2.27187	0.21799
2.02085	0.19614	1.96649	0.19734	2.27703	0.21812
2.00459	0.19623	1.97204	0.19747	2.27861	0.21822
2.02516	0.19627	1.95836	0.19756	2.27903	0.21826
2.02497	0.19645	1.96946	0.19765	2.28006	0.2184
2.02024	0.19649	1.95607	0.19773	2.28078	0.21845
2.01682	0.19658	1.97108	0.19782	2.28271	0.21854
2.01457	0.19676	1.95353	0.19791	2.28369	0.21863
2.02972	0.1968	1.97678	0.19804	2.28298	0.21868
2.02712	0.19698	1.9595	0.19813	2.28131	0.21881
2.02697	0.19702	1.96378	0.19826	2.28046	0.21886
2.03959	0.19715	1.9828	0.19835	2.28336	0.219
2.02329	0.19724	1.98287	0.1984	2.28327	0.21909
2.03946	0.19737	1.99263	0.19857	2.28419	0.21909
2.0238	0.19746	1.97427	0.19862	2.28479	0.21927
2.04056	0.1975	1.98479	0.19875	2.28577	0.21932
2.04487	0.19768	1.97114	0.19884	2.28711	0.21946
2.0468	0.19772	1.99182	0.19892	2.28546	0.2195
2.04997	0.1979	1.99761	0.19906	2.28675	0.21959
2.03284	0.19794	1.99136	0.1991	2.29106	0.21968
2.04878	0.19807	2.00214	0.19928	2.29441	0.21978
2.03671	0.19816	1.99177	0.19932	2.3	0.21991
2.03967	0.19829	2.0027	0.19936	2.30336	0.21996
2.05139	0.19833	1.99928	0.19954	2.30404	0.22001
2.04557	0.19851	2.01978	0.19958	2.30769	0.22014
2.06311	0.1986	2.0067	0.19972	2.30823	0.22024
2.05591	0.19869	2.01835	0.1998	2.30894	0.22028
2.05883	0.19877	1.9955	0.19985	2.3101	0.22042
2.05092	0.19886	1.99839	0.20003	2.31129	0.22046
2.0519	0.19899	1.99617	0.20007	2.31292	0.2206
2.0601	0.19904	2.00996	0.2002	2.31438	0.22069
2.05288	0.19921	2.02935	0.20029	2.32003	0.22079
2.05719	0.19934	2.02458	0.20033	2.3226	0.22088
2.06129	0.19939	2.03692	0.20047	2.32252	0.22092
2.05698	0.19952	2.01317	0.20055	2.32507	0.22106
2.07388	0.19961	2.01996	0.2006	2.32618	0.22111
2.06162	0.19969	2.00932	0.20073	2.32866	0.22115
2.07854	0.19983	2.02747	0.20082	2.33203	0.22129
2.06443	0.19987	2.02445	0.20095	2.33628	0.22134
2.0708	0.20005	2.03976	0.20104	2.34001	0.22147
2.07836	0.20009	2.03348	0.20113	2.34378	0.22157
2.0751	0.20022	2.03964	0.20121	2.34608	0.22166
2.09113	0.20031	2.03105	0.2013	2.34708	0.2217
2.08652	0.20044	2.0435	0.20139	2.34721	0.22179
2.09956	0.20053	2.03678	0.20148	2.35136	0.22189
2.09425	0.20062	2.04523	0.20157	2.35308	0.22193
2.10063	0.2007	2.04434	0.2017	2.35243	0.22202
2.10544	0.20083	2.03801	0.20174	2.35576	0.22212
2.09751	0.20088	2.04742	0.20187	2.35504	0.22221
2.09529	0.20097	2.03173	0.20196	2.35633	0.2223
2.09244	0.2011	2.05398	0.2021	2.35671	0.22235
2.10128	0.20114	2.03498	0.20214	2.36116	0.22248
2.099	0.20132	2.0544	0.20223	2.36304	0.22253
2.11474	0.20136	2.04965	0.20236	2.36661	0.22262
2.1037	0.20149	2.05805	0.2024	2.37213	0.22271
2.12044	0.20158	2.04766	0.20254	2.37501	0.22276
2.11752	0.20171	2.0506	0.20262	2.37958	0.2229
2.12026	0.20176	2.056	0.20276	2.37982	0.22294
2.12328	0.20189	2.04421	0.20284	2.38087	0.22299
2.10304	0.20198	2.05197	0.20289	2.38303	0.22312
2.12542	0.20211	2.04727	0.20306	2.38423	0.22317
2.10915	0.20215	2.06527	0.20311	2.39115	0.22326
2.12858	0.20224	2.06087	0.20324	2.39251	0.22335
2.1123	0.20237	2.07477	0.20333	2.39515	0.22335
2.13152	0.20241	2.06164	0.20342	2.40005	0.22349
2.13487	0.20259	2.06447	0.20351	2.39973	0.22354
2.12712	0.20268	2.05389	0.20359	2.40228	0.22363
2.13855	0.20276	2.05116	0.20373	2.404	0.22368
2.1208	0.20285	2.06233	0.20377	2.40671	0.22377
2.12896	0.2029	2.0694	0.20386	2.40799	0.22386
2.12668	0.20303	2.08531	0.20403	2.41069	0.22391
2.14528	0.20312	2.06797	0.20408	2.41349	0.224
2.1356	0.20325	2.08799	0.20421	2.41214	0.22409
2.13397	0.20338	2.06775	0.20425	2.41321	0.22409
2.1428	0.20342	2.06918	0.20443	2.41666	0.22423
2.15502	0.20351	2.07488	0.20447	2.41836	0.22427
2.14876	0.20364	2.08587	0.20452	2.42269	0.22436
2.15034	0.20369	2.08543	0.20469	2.4221	0.22441
2.15684	0.20382	2.0772	0.20478	2.42288	0.22446
2.15018	0.20386	2.09499	0.20491	2.42427	0.22455
2.16262	0.20404	2.0784	0.20496	2.4262	0.22464
2.14452	0.20408	2.09111	0.20509	2.42828	0.22473
2.16444	0.20421	2.08527	0.20518	2.42902	0.22478
2.15058	0.20426	2.09585	0.20527	2.43158	0.22487
2.1714	0.20439	2.09035	0.20536	2.43359	0.22491
2.15337	0.20443	2.09615	0.20544	2.43541	0.22501
2.15919	0.20461	2.09924	0.20558	2.43731	0.2251
2.1613	0.20465	2.07758	0.20566	2.43718	0.22514
2.15544	0.20478	2.08385	0.20571	2.43825	0.22524
2.16281	0.20483	2.07892	0.20588	2.43761	0.22528
2.15916	0.20496	2.10524	0.20597	2.43722	0.22533
2.17385	0.20505	2.08641	0.20602	2.43562	0.22546
2.15983	0.20518	2.09878	0.20615	2.43577	0.22551
2.1819	0.20522	2.09401	0.20624	2.43954	0.2256
2.1697	0.20535	2.08821	0.20637	2.44022	0.22565
2.18157	0.20544	2.11028	0.20646	2.44037	0.22569
2.17035	0.20553	2.10729	0.20659	2.4401	0.22583
2.17804	0.20562	2.12506	0.20668	2.4395	0.22588
2.18816	0.20575	2.12943	0.20681	2.44173	0.22597
2.17024	0.20583	2.11931	0.2069	2.44082	0.22601
2.1903	0.20592	2.13121	0.20699	2.44206	0.22611
2.17359	0.20601	2.11676	0.20707	2.44516	0.2262
2.19322	0.2061	2.12367	0.20716	2.4451	0.22624
2.17923	0.20623	2.11262	0.20729	2.44566	0.22638
2.1949	0.20627	2.13208	0.20734	2.44675	0.22643
2.18899	0.2064	2.12735	0.20747	2.44954	0.22652
2.19897	0.20645	2.14514	0.20756	2.45315	0.22661
2.19554	0.20662	2.14098	0.20765	2.45555	0.22666
2.19732	0.20667	2.1471	0.20773	2.45739	0.2267
2.20887	0.2068	2.1395	0.20782	2.45823	0.22679
2.19405	0.20689	2.14556	0.20795	2.46009	0.22689
2.2064	0.20702	2.1438	0.208	2.45921	0.22698
2.19126	0.20706	2.14146	0.20813	2.45861	0.22707
2.20497	0.20719	2.14654	0.20817	2.45772	0.22712
2.19291	0.20728	2.13828	0.20831	2.45935	0.22721
2.20735	0.20737	2.15446	0.20839	2.46187	0.2273
2.20225	0.20746	2.15354	0.20844	2.46339	0.22739
2.21765	0.20755	2.16667	0.20857	2.46559	0.22744
2.20869	0.20763	2.16174	0.20862	2.46604	0.22748
2.22115	0.20772	2.17566	0.20879	2.46508	0.22762
2.22505	0.20785	2.16061	0.20884	2.46512	0.22767
2.21736	0.2079	2.17481	0.20892	2.46725	0.2278
2.2251	0.20803	2.16059	0.20901	2.46823	0.22785
2.21094	0.20812	2.17878	0.2091	2.46767	0.2279
2.22926	0.20825	2.1574	0.20919	2.47001	0.22803
2.21569	0.20829	2.17392	0.20928	2.47163	0.22808
2.2246	0.20842	2.16658	0.20941	2.47703	0.22822
2.2156	0.20851	2.17958	0.2095	2.47699	0.22826
2.22151	0.20864	2.16592	0.20954	2.47994	0.22831
2.22986	0.20869	2.18499	0.20967	2.47801	0.22845
2.22757	0.20882	2.17255	0.20972	2.47757	0.22849
2.23448	0.20886	2.18954	0.20985	2.4769	0.22863
2.22786	0.20904	2.17677	0.20989	2.4765	0.22868
2.24302	0.20908	2.18816	0.21003	2.46066	0.22881
2.23282	0.20921	2.1854	0.21011	2.4589	0.22886
2.25156	0.20926	2.19061	0.2102	2.46001	0.22895
2.24012	0.20939	2.18591	0.21029	2.46301	0.22904
2.25064	0.20948	2.19946	0.21033	2.46687	0.22913
2.23586	0.20952	2.18567	0.21047	2.46791	0.22927
2.24782	0.20965	2.20007	0.21051	2.46731	0.22932
2.23662	0.20974	2.19734	0.21069	2.4678	0.22941
2.23921	0.20987	2.1949	0.21073	2.47409	0.22955
2.24719	0.20991	2.20334	0.21086	2.47724	0.22959
2.24355	0.21005	2.19523	0.21091	2.4822	0.22973
2.25733	0.21013	2.1933	0.21099	2.48627	0.22982
2.24529	0.21022	2.18965	0.21113	2.48738	0.22987
2.2627	0.21031	2.19277	0.21117	2.49164	0.23001
2.25729	0.21044	2.19048	0.2113	2.49052	0.2301
2.26848	0.21053	2.20996	0.21139	2.49673	0.23019
2.2643	0.21112	2.19536	0.21152	2.49815	0.23028
2.26884	0.2112	2.20705	0.21161	2.50228	0.23033
2.25857	0.21129	2.18792	0.21166	2.5073	0.23046
2.27012	0.21138	2.19574	0.21179	2.50718	0.23051
2.26112	0.21147	2.17982	0.21187	2.51087	0.2306
2.26545	0.2116	2.20265	0.21196	2.51345	0.23074
2.27057	0.21164	2.20813	0.2121	2.51475	0.23079
2.26546	0.21177	2.20343	0.21214	2.51889	0.23088
2.28669	0.21186	2.21607	0.21232	2.52008	0.23097
2.27297	0.21195	2.20158	0.2124	2.51981	0.23101
2.28885	0.21204	2.21475	0.21249	2.52103	0.23115
2.2828	0.21217	2.21177	0.21258	2.52032	0.2312
2.29254	0.21221	2.22588	0.21267	2.52251	0.23134
2.28577	0.21234	2.22086	0.2128	2.52382	0.23138
2.2964	0.21243	2.21279	0.21284	2.52757	0.23143
2.28836	0.21252	2.21941	0.21298	2.52567	0.23157
2.2975	0.21261	2.20664	0.21306	2.52697	0.23166
2.3034	0.21274	2.22617	0.2132	2.52679	0.23175
2.29881	0.21278	2.21388	0.21328	2.52862	0.23179
2.31246	0.21291	2.23372	0.21333	2.5322	0.23189
2.30414	0.21296	2.23292	0.21346	2.5346	0.23198
2.31528	0.21309	2.24358	0.21355	2.53776	0.23207
2.30827	0.21313	2.24126	0.21368	2.53837	0.23221
2.30577	0.21322	2.23559	0.21373	2.54088	0.23225
2.30282	0.21335	2.24346	0.21386	2.54013	0.2323
2.30884	0.2134	2.22628	0.21395	2.54554	0.23244
2.30552	0.21353	2.2409	0.21403	2.54643	0.23248
2.31273	0.21362	2.23446	0.21417	2.55349	0.23262
2.30729	0.2137	2.24886	0.21421	2.55484	0.23267
2.3173	0.21375	2.24808	0.21434	2.55585	0.23271
2.31312	0.21388	2.25203	0.21443	2.55032	0.23285
2.32229	0.21392	2.25635	0.21456	2.54773	0.2329
2.31591	0.21405	2.25212	0.21461	2.54874	0.23303
2.33387	0.21414	2.25073	0.21469	2.54786	0.23308
2.3205	0.21423	2.2499	0.21483	2.54967	0.23322
2.33776	0.21432	2.25735	0.21487	2.55169	0.23326
2.32249	0.21445	2.24741	0.21505	2.5534	0.23335
2.33903	0.21449	2.26444	0.21509	2.5579	0.23345
2.32304	0.21462	2.24678	0.21522	2.55957	0.23354
2.34179	0.21467	2.26166	0.21531	2.56321	0.23363
2.32933	0.2148	2.24414	0.21536	2.56232	0.23372
2.35046	0.21484	2.24883	0.21553	2.56194	0.23377
2.33797	0.21498	2.24918	0.21558	2.56368	0.23391
2.34834	0.21502	2.25394	0.21571	2.56399	0.23395
2.33517	0.21515	2.27332	0.2158	2.56738	0.23409
2.34638	0.21524	2.25284	0.21593	2.56711	0.23418
2.33823	0.21533	2.27187	0.21597	2.57186	0.23423
2.34895	0.21541	2.25405	0.21606	2.572	0.23436
2.33399	0.21546	2.26065	0.21619	2.57487	0.23441
2.35082	0.21559	2.25254	0.21628	2.57595	0.2345
2.33378	0.21563	2.25399	0.21641	2.58051	0.23459
2.34636	0.21581	2.27081	0.2165	2.58169	0.23468
2.34723	0.21585	2.26438	0.21659	2.58187	0.23478
2.34411	0.21598	2.2752	0.21668	2.58078	0.23487
2.3483	0.21603	2.26284	0.21676	2.58397	0.23491
2.34652	0.21616	2.27864	0.2169	2.58596	0.23505
2.36544	0.21625	2.28018	0.21699	2.58591	0.2351
2.353	0.21634	2.27485	0.21712	2.58935	0.23524
2.36909	0.21642	2.29072	0.21721	2.59122	0.23528
2.35284	0.21651	2.28526	0.21734	2.59189	0.23537
2.36917	0.2166	2.29489	0.21743	2.5931	0.23551
2.36377	0.21673	2.28022	0.21747	2.59408	0.23556
2.37719	0.21677	2.29563	0.2176	2.5953	0.23569
2.36486	0.2169	2.28624	0.21769	2.59693	0.23574
2.37592	0.21695	2.29672	0.21782	2.59782	0.23579
2.36439	0.21704	2.30614	0.21787	2.59969	0.23592
[truncated: 9,058 more rows]

## Sheet: pH = 7，Stress-Strain 
Stress	SP5-10(7)	Stress	SP10-15(7)	Stress	SP15-20(7)
0	0	0	0	0	0
0.10068	0.00112	0.10032	0.02261	0.10097	0.0172
0.10078	0.00117	0.10082	0.02261	0.10124	0.0172
0.10149	0.00117	0.10132	0.02261	0.10031	0.0172
0.10094	0.00117	0.10104	0.02261	0.10141	0.0172
0.10103	0.00117	0.09941	0.02265	0.10017	0.0172
0.10164	0.00117	0.09959	0.02265	0.09903	0.01725
0.1009	0.00121	0.10064	0.02265	0.10033	0.01725
0.10127	0.00121	0.10018	0.02265	0.10166	0.01725
0.1021	0.00121	0.10046	0.02265	0.1009	0.01725
0.0998	0.00121	0.10113	0.0227	0.10161	0.01725
0.10085	0.00121	0.10136	0.0227	0.10087	0.01729
0.10018	0.00125	0.10045	0.0227	0.10083	0.01729
0.10025	0.00125	0.10192	0.0227	0.10071	0.01729
0.1019	0.00125	0.10431	0.02274	0.10127	0.01729
0.10076	0.00125	0.10203	0.02274	0.10192	0.01729
0.10152	0.0013	0.10274	0.02274	0.10157	0.01734
0.1008	0.0013	0.1026	0.02274	0.1028	0.01734
0.10181	0.0013	0.10132	0.02274	0.10306	0.01734
0.10374	0.0013	0.10283	0.02278	0.10122	0.01734
0.10281	0.0013	0.10205	0.02278	0.10169	0.01734
0.11005	0.00134	0.10215	0.02278	0.10237	0.01739
0.10283	0.00134	0.10318	0.02278	0.10154	0.01739
0.10385	0.00134	0.10265	0.02278	0.10169	0.01739
0.10287	0.00134	0.09373	0.02283	0.10154	0.01739
0.10355	0.00134	0.10201	0.02283	0.10032	0.01739
0.10255	0.00139	0.10201	0.02283	0.10065	0.01743
0.10301	0.00139	0.10364	0.02283	0.10065	0.01743
0.10247	0.00139	0.10344	0.02283	0.10152	0.01743
0.10269	0.00139	0.10321	0.02287	0.10045	0.01743
0.10224	0.00139	0.10371	0.02287	0.10106	0.01743
0.09282	0.00143	0.10383	0.02287	0.10145	0.01748
0.10261	0.00143	0.10439	0.02287	0.10237	0.01748
0.10309	0.00143	0.11469	0.02292	0.10164	0.01748
0.10187	0.00143	0.10406	0.02292	0.10155	0.01748
0.10159	0.00143	0.10411	0.02292	0.10205	0.01752
0.10323	0.00147	0.1048	0.02292	0.1018	0.01752
0.10311	0.00147	0.10362	0.02292	0.1018	0.01752
0.10261	0.00147	0.10408	0.02296	0.10154	0.01752
0.10346	0.00147	0.10434	0.02296	0.10169	0.01752
0.10267	0.00147	0.10433	0.02296	0.10178	0.01757
0.1027	0.00152	0.10494	0.02296	0.10302	0.01757
0.10374	0.00152	0.10604	0.02296	0.10215	0.01757
0.10498	0.00152	0.09605	0.02301	0.1021	0.01757
0.10475	0.00152	0.10375	0.02301	0.10242	0.01757
0.10507	0.00156	0.10413	0.02301	0.10111	0.01761
0.10474	0.00156	0.10329	0.02301	0.10233	0.01761
0.10568	0.00156	0.1052	0.02301	0.10339	0.01761
0.10411	0.00156	0.10517	0.02305	0.10293	0.01761
0.1043	0.00156	0.10434	0.02305	0.10376	0.01761
0.09589	0.0016	0.10456	0.02305	0.10201	0.01766
0.10438	0.0016	0.10443	0.02305	0.10157	0.01766
0.10385	0.0016	0.10442	0.02305	0.10178	0.01766
0.10401	0.0016	0.10572	0.0231	0.10143	0.01766
0.10298	0.0016	0.10631	0.0231	0.10134	0.01766
0.10321	0.00165	0.10511	0.0231	0.10376	0.01771
0.10448	0.00165	0.10646	0.0231	0.10215	0.01771
0.1032	0.00165	0.10603	0.02314	0.1021	0.01771
0.10401	0.00165	0.10494	0.02314	0.10293	0.01771
0.1105	0.00169	0.10581	0.02314	0.10247	0.01775
0.10539	0.00169	0.10563	0.02314	0.10296	0.01775
0.10484	0.00169	0.10544	0.02314	0.10234	0.01775
0.10503	0.00169	0.09941	0.02319	0.10287	0.01775
0.1047	0.00169	0.10452	0.02319	0.10186	0.01775
0.10428	0.00174	0.10634	0.02319	0.10169	0.0178
0.10437	0.00174	0.10536	0.02319	0.10149	0.0178
0.10415	0.00174	0.10623	0.02319	0.10157	0.0178
0.10337	0.00174	0.10594	0.02323	0.10115	0.0178
0.10425	0.00174	0.10655	0.02323	0.10096	0.0178
0.0984	0.00178	0.10548	0.02323	0.10154	0.01784
0.10306	0.00178	0.10536	0.02323	0.10023	0.01784
0.10275	0.00178	0.10699	0.02323	0.10124	0.01784
0.10399	0.00178	0.11762	0.02328	0.10096	0.01784
0.10302	0.00178	0.10801	0.02328	0.10064	0.01784
0.10429	0.00182	0.10828	0.02328	0.10056	0.01789
0.1032	0.00182	0.10815	0.02328	0.10055	0.01789
0.10419	0.00182	0.1074	0.02328	0.10073	0.01789
0.10318	0.00182	0.10787	0.02332	0.10013	0.01789
0.10369	0.00182	0.10824	0.02332	0.09994	0.01793
0.10795	0.00187	0.10796	0.02332	0.09963	0.01793
0.10553	0.00187	0.10767	0.02332	0.09985	0.01793
0.10611	0.00187	0.10818	0.02332	0.09926	0.01793
0.10558	0.00187	0.10823	0.02337	0.09931	0.01793
0.10452	0.00187	0.10772	0.02337	0.09707	0.01798
0.10662	0.00191	0.10759	0.02337	0.09831	0.01798
0.10583	0.00191	0.10814	0.02337	0.09876	0.01798
0.1057	0.00191	0.10936	0.02341	0.09832	0.01798
0.10451	0.00191	0.10814	0.02341	0.0982	0.01798
0.10545	0.00191	0.10915	0.02341	0.09885	0.01803
0.1047	0.00196	0.10804	0.02341	0.09848	0.01803
0.10516	0.00196	0.10911	0.02341	0.09918	0.01803
0.10502	0.00196	0.11935	0.02346	0.09931	0.01803
0.1048	0.00196	0.10924	0.02346	0.09862	0.01803
0.10434	0.00196	0.10968	0.02346	0.09945	0.01807
0.10542	0.002	0.10992	0.02346	0.09831	0.01807
0.10429	0.002	0.10809	0.02346	0.09916	0.01807
0.10531	0.002	0.10855	0.0235	0.09841	0.01807
0.10558	0.002	0.10828	0.0235	0.09954	0.01807
0.11435	0.00204	0.10805	0.0235	0.10054	0.01812
0.10731	0.00204	0.10966	0.0235	0.10018	0.01812
0.10736	0.00204	0.11001	0.0235	0.10001	0.01812
0.10698	0.00204	0.10898	0.02355	0.09912	0.01812
0.10693	0.00204	0.1081	0.02355	0.09839	0.01816
0.10479	0.00209	0.10934	0.02355	0.10055	0.01816
0.10563	0.00209	0.10915	0.02355	0.10023	0.01816
0.1063	0.00209	0.1095	0.02355	0.1005	0.01816
0.10759	0.00209	0.10973	0.02359	0.10113	0.01816
0.10383	0.00213	0.10997	0.02359	0.10073	0.01821
0.10447	0.00213	0.10847	0.02359	0.10008	0.01821
0.106	0.00213	0.10932	0.02359	0.1009	0.01821
0.10514	0.00213	0.11838	0.02364	0.10041	0.01821
0.10511	0.00213	0.10992	0.02364	0.1011	0.01821
0.10707	0.00213	0.10892	0.02364	0.10318	0.01825
0.10662	0.00217	0.10879	0.02364	0.10101	0.01825
0.10662	0.00217	0.10943	0.02364	0.10224	0.01825
0.10708	0.00217	0.10983	0.02368	0.10122	0.01825
0.10662	0.00217	0.1098	0.02368	0.1018	0.0183
0.10867	0.00217	0.10906	0.02368	0.10159	0.0183
0.10876	0.00222	0.10865	0.02368	0.10206	0.0183
0.108	0.00222	0.10846	0.02368	0.10251	0.0183
0.10795	0.00222	0.10603	0.02373	0.10273	0.0183
0.10876	0.00222	0.10553	0.02373	0.10233	0.0183
0.10881	0.00226	0.10563	0.02373	0.10257	0.01835
0.10845	0.00226	0.1059	0.02373	0.10152	0.01835
0.10858	0.00226	0.10692	0.02373	0.10288	0.01835
0.10887	0.00226	0.10567	0.02377	0.10161	0.01835
0.10908	0.00226	0.10726	0.02377	0.10126	0.01835
0.10145	0.00231	0.10576	0.02377	0.10124	0.01839
0.10667	0.00231	0.10657	0.02377	0.10097	0.01839
0.10784	0.00231	0.11121	0.02382	0.10205	0.01839
0.10761	0.00231	0.10731	0.02382	0.10237	0.01839
0.10698	0.00231	0.10668	0.02382	0.10205	0.01844
0.10831	0.00235	0.10721	0.02382	0.10129	0.01844
0.1069	0.00235	0.10694	0.02382	0.10161	0.01844
0.1074	0.00235	0.10745	0.02386	0.10224	0.01844
0.10798	0.00235	0.10744	0.02386	0.10164	0.01844
0.10896	0.00235	0.10687	0.02386	0.10122	0.01848
0.1199	0.00239	0.10712	0.02386	0.10233	0.01848
0.10782	0.00239	0.10715	0.02386	0.10318	0.01848
0.10863	0.00239	0.10594	0.02386	0.10183	0.01848
0.10955	0.00239	0.10597	0.02391	0.10177	0.01853
0.11025	0.00239	0.10591	0.02391	0.10247	0.01853
0.1074	0.00244	0.10712	0.02391	0.10037	0.01853
0.10917	0.00244	0.10544	0.02391	0.10168	0.01853
0.10885	0.00244	0.10457	0.02391	0.10219	0.01853
0.10947	0.00244	0.1054	0.02395	0.10242	0.01853
0.1095	0.00244	0.10611	0.02395	0.10302	0.01857
0.10768	0.00248	0.10645	0.02395	0.10321	0.01857
0.10859	0.00248	0.10722	0.02395	0.10192	0.01857
0.10759	0.00248	0.11734	0.024	0.1021	0.01857
0.108	0.00248	0.10741	0.024	0.10265	0.01857
0.10882	0.00248	0.10768	0.024	0.10387	0.01862
0.10901	0.00253	0.10806	0.024	0.10357	0.01862
0.10764	0.00253	0.10787	0.024	0.10293	0.01862
0.10886	0.00253	0.10713	0.02404	0.1038	0.01862
0.10768	0.00253	0.10893	0.02404	0.1041	0.01867
0.11841	0.00257	0.10819	0.02404	0.10397	0.01867
0.10909	0.00257	0.1066	0.02404	0.10321	0.01867
0.10959	0.00257	0.10182	0.02408	0.10329	0.01867
0.10918	0.00257	0.09757	0.02408	0.10361	0.01867
0.1095	0.00257	0.10634	0.02408	0.10218	0.01871
0.10882	0.00257	0.10632	0.02408	0.1038	0.01871
0.10983	0.00261	0.10752	0.02408	0.1039	0.01871
0.10937	0.00261	0.108	0.02408	0.10311	0.01871
0.10886	0.00261	0.10845	0.02413	0.10346	0.01871
0.1095	0.00261	0.1086	0.02413	0.10419	0.01876
0.10306	0.00266	0.10818	0.02413	0.10401	0.01876
0.10873	0.00266	0.10682	0.02413	0.10264	0.01876
0.10877	0.00266	0.10769	0.02413	0.10273	0.01876
0.10955	0.00266	0.10918	0.02417	0.10531	0.0188
0.10873	0.00266	0.11022	0.02417	0.10302	0.0188
0.10885	0.0027	0.10987	0.02417	0.10415	0.0188
0.10867	0.0027	0.10915	0.02417	0.10448	0.0188
0.11011	0.0027	0.1093	0.02422	0.10411	0.0188
0.10904	0.0027	0.10901	0.02422	0.10462	0.0188
0.10978	0.0027	0.10966	0.02422	0.1038	0.01885
0.11362	0.00275	0.10962	0.02422	0.10367	0.01885
0.11115	0.00275	0.10842	0.02422	0.10424	0.01885
0.11066	0.00275	0.1014	0.02426	0.10422	0.01885
0.11247	0.00275	0.10841	0.02426	0.10367	0.01889
0.1111	0.00279	0.10838	0.02426	0.10366	0.01889
0.11151	0.00279	0.10874	0.02426	0.10447	0.01889
0.11206	0.00279	0.10828	0.02426	0.10366	0.01889
0.11151	0.00279	0.10906	0.02431	0.10375	0.01889
0.11164	0.00279	0.10832	0.02431	0.1035	0.01894
0.10182	0.00283	0.10932	0.02431	0.10387	0.01894
0.11179	0.00283	0.1101	0.02431	0.10348	0.01894
0.11201	0.00283	0.10982	0.02431	0.10434	0.01894
0.11234	0.00283	0.11083	0.02435	0.1054	0.01894
0.11133	0.00283	0.10982	0.02435	0.10544	0.01898
0.11211	0.00288	0.11106	0.02435	0.10433	0.01898
0.11215	0.00288	0.10989	0.02435	0.10503	0.01898
0.11216	0.00288	0.10927	0.02435	0.10489	0.01898
0.11303	0.00288	0.11025	0.0244	0.10634	0.01903
0.11408	0.00288	0.11048	0.0244	0.10475	0.01903
0.1241	0.00292	0.10975	0.0244	0.10348	0.01903
0.11463	0.00292	0.11121	0.0244	0.10553	0.01903
0.11408	0.00292	0.10256	0.02444	0.10563	0.01903
0.11418	0.00292	0.10938	0.02444	0.10344	0.01908
0.11516	0.00292	0.10916	0.02444	0.10475	0.01908
0.11471	0.00296	0.10892	0.02444	0.10553	0.01908
0.11395	0.00296	0.11008	0.02444	0.1054	0.01908
0.11518	0.00296	0.10978	0.02449	0.10534	0.01908
0.1138	0.00296	0.10997	0.02449	0.10641	0.01908
0.10576	0.00301	0.11022	0.02449	0.1059	0.01912
0.1143	0.00301	0.10962	0.02449	0.1066	0.01912
0.11499	0.00301	0.11085	0.02449	0.10687	0.01912
0.11413	0.00301	0.11986	0.02453	0.10745	0.01912
0.11502	0.00301	0.11195	0.02453	0.10715	0.01917
0.11261	0.00305	0.11103	0.02453	0.10699	0.01917
0.11431	0.00305	0.11043	0.02453	0.106	0.01917
0.11444	0.00305	0.11144	0.02458	0.10576	0.01917
0.11562	0.00305	0.11071	0.02458	0.1086	0.01917
0.11499	0.00305	0.11017	0.02458	0.10712	0.01921
0.12433	0.0031	0.11102	0.02458	0.10782	0.01921
0.11542	0.0031	0.1107	0.02458	0.10864	0.01921
0.11564	0.0031	0.10448	0.02462	0.10852	0.01921
0.11586	0.0031	0.11089	0.02462	0.10745	0.01926
0.116	0.00314	0.11172	0.02462	0.10722	0.01926
0.11564	0.00314	0.10939	0.02462	0.10706	0.01926
0.11581	0.00314	0.11066	0.02462	0.10738	0.01926
0.11655	0.00314	0.11112	0.02462	0.10837	0.01926
0.11705	0.00314	0.11024	0.02467	0.10818	0.0193
0.10851	0.00318	0.11117	0.02467	0.10822	0.0193
0.11495	0.00318	0.10918	0.02467	0.10846	0.0193
0.1164	0.00318	0.11043	0.02467	0.10856	0.0193
0.1155	0.00318	0.11469	0.02471	0.10991	0.0193
0.11669	0.00318	0.11234	0.02471	0.10989	0.01935
0.1165	0.00323	0.11171	0.02471	0.10938	0.01935
0.11518	0.00323	0.11177	0.02471	0.10964	0.01935
0.11518	0.00323	0.11203	0.02471	0.10969	0.01935
0.11585	0.00323	0.11167	0.02476	0.10943	0.01935
0.11527	0.00323	0.1127	0.02476	0.10966	0.0194
0.12501	0.00327	0.11215	0.02476	0.10925	0.0194
0.11612	0.00327	0.11185	0.02476	0.11017	0.0194
0.11516	0.00327	0.10586	0.0248	0.10969	0.0194
0.11635	0.00327	0.11075	0.0248	0.10883	0.0194
0.11519	0.00332	0.11345	0.0248	0.10754	0.01944
0.11558	0.00332	0.11303	0.0248	0.10934	0.01944
0.11592	0.00332	0.11299	0.0248	0.1087	0.01944
0.11595	0.00332	0.11231	0.0248	0.10865	0.01944
0.115	0.00332	0.11239	0.02485	0.10927	0.01944
0.11613	0.00332	0.11248	0.02485	0.1092	0.01949
0.11514	0.00336	0.11176	0.02485	0.11065	0.01949
0.11471	0.00336	0.11215	0.02485	0.10969	0.01949
0.11395	0.00336	0.11112	0.02485	0.1102	0.01949
0.11366	0.00336	0.11322	0.02489	0.11121	0.01953
0.11499	0.00336	0.11394	0.02489	0.1112	0.01953
0.11418	0.0034	0.11299	0.02489	0.11003	0.01953
0.11435	0.0034	0.11378	0.02489	0.11071	0.01953
0.11399	0.0034	0.11303	0.02494	0.11017	0.01953
0.11436	0.0034	0.11349	0.02494	0.1119	0.01958
0.1266	0.00345	0.11369	0.02494	0.11092	0.01958
0.11632	0.00345	0.11362	0.02494	0.11033	0.01958
0.11603	0.00345	0.11336	0.02494	0.11126	0.01958
0.11581	0.00345	0.11227	0.02498	0.11011	0.01958
0.11353	0.00349	0.11239	0.02498	0.11062	0.01962
0.11525	0.00349	0.11259	0.02498	0.10978	0.01962
0.11578	0.00349	0.11276	0.02498	0.11031	0.01962
0.11627	0.00349	0.11313	0.02498	0.11028	0.01962
0.11532	0.00349	0.1127	0.02503	0.11024	0.01962
0.11608	0.00349	0.11307	0.02503	0.11024	0.01967
0.10396	0.00353	0.11413	0.02503	0.11043	0.01967
0.11339	0.00353	0.11368	0.02503	0.11143	0.01967
0.11407	0.00353	0.11299	0.02503	0.11092	0.01967
0.11353	0.00353	0.1227	0.02507	0.11115	0.01967
0.11477	0.00353	0.1127	0.02507	0.11293	0.01972
0.11481	0.00358	0.11346	0.02507	0.11122	0.01972
0.11536	0.00358	0.11404	0.02507	0.11115	0.01972
0.11565	0.00358	0.11474	0.02507	0.11144	0.01972
0.11331	0.00358	0.11465	0.02512	0.11194	0.01976
0.11947	0.00362	0.11414	0.02512	0.11125	0.01976
0.11733	0.00362	0.11385	0.02512	0.11194	0.01976
0.11595	0.00362	0.11359	0.02512	0.11192	0.01976
0.11714	0.00362	0.11108	0.02516	0.11079	0.01976
0.11658	0.00362	0.11446	0.02516	0.11022	0.01981
0.11641	0.00367	0.11417	0.02516	0.11171	0.01981
0.11681	0.00367	0.11529	0.02516	0.11153	0.01981
0.11544	0.00367	0.11478	0.02516	0.11046	0.01981
0.1159	0.00367	0.11518	0.02521	0.11057	0.01981
0.10959	0.00371	0.11518	0.02521	0.11271	0.01985
0.11528	0.00371	0.11568	0.02521	0.11006	0.01985
0.11509	0.00371	0.11596	0.02521	0.11102	0.01985
0.11539	0.00371	0.12158	0.02525	0.11167	0.01985
0.11678	0.00371	0.1173	0.02525	0.11052	0.01985
0.11635	0.00371	0.1161	0.02525	0.11248	0.0199
0.11594	0.00375	0.11591	0.02525	0.11199	0.0199
0.1156	0.00375	0.11589	0.02525	0.11093	0.0199
0.11742	0.00375	0.11611	0.0253	0.11185	0.0199
0.11737	0.00375	0.11633	0.0253	0.11204	0.0199
0.12629	0.0038	0.11624	0.0253	0.11008	0.01994
0.11747	0.0038	0.1172	0.0253	0.11241	0.01994
0.11798	0.0038	0.11707	0.0253	0.11149	0.01994
0.1171	0.0038	0.10568	0.02534	0.11149	0.01994
0.11695	0.0038	0.11559	0.02534	0.11071	0.01999
0.11811	0.00384	0.1167	0.02534	0.11144	0.01999
0.11727	0.00384	0.1167	0.02534	0.11148	0.01999
0.11742	0.00384	0.11536	0.02534	0.11143	0.01999
0.11865	0.00384	0.11687	0.02539	0.11139	0.01999
0.11805	0.00384	0.11707	0.02539	0.11167	0.02003
0.11649	0.00389	0.11873	0.02539	0.11149	0.02003
0.1172	0.00389	0.11753	0.02539	0.1113	0.02003
0.11706	0.00389	0.11693	0.02539	0.11084	0.02003
0.11604	0.00389	0.12966	0.02543	0.11157	0.02003
0.11719	0.00393	0.11757	0.02543	0.11246	0.02008
0.11791	0.00393	0.1166	0.02543	0.11117	0.02008
0.11772	0.00393	0.11671	0.02543	0.11135	0.02008
0.11819	0.00393	0.11568	0.02543	0.11217	0.02008
0.11844	0.00393	0.11738	0.02547	0.11213	0.02008
0.12652	0.00397	0.11586	0.02547	0.11122	0.02013
0.11784	0.00397	0.1162	0.02547	0.1122	0.02013
0.11833	0.00397	0.11688	0.02547	0.11185	0.02013
0.11797	0.00397	0.11697	0.02547	0.11111	0.02013
0.11905	0.00397	0.10819	0.02552	0.11001	0.02013
0.11812	0.00402	0.1139	0.02552	0.11038	0.02017
0.11802	0.00402	0.11511	0.02552	0.11084	0.02017
0.11821	0.00402	0.1162	0.02552	0.11099	0.02017
0.11892	0.00402	0.11564	0.02552	0.11148	0.02017
0.11846	0.00402	0.11729	0.02552	0.11089	0.02017
0.11809	0.00406	0.11642	0.02556	0.11231	0.02022
0.11718	0.00406	0.11538	0.02556	0.11089	0.02022
0.11766	0.00406	0.11769	0.02556	0.11066	0.02022
0.11761	0.00406	0.11752	0.02556	0.11071	0.02022
0.11741	0.00406	0.11783	0.02556	0.11276	0.02026
0.1187	0.00411	0.1167	0.02556	0.11217	0.02026
0.11821	0.00411	0.12082	0.02561	0.11148	0.02026
0.11779	0.00411	0.11767	0.02561	0.11284	0.02026
0.11809	0.00411	0.11797	0.02561	0.1119	0.02026
0.12679	0.00415	0.11718	0.02561	0.11262	0.02031
0.12042	0.00415	0.11679	0.02561	0.11294	0.02031
0.11861	0.00415	0.11706	0.02565	0.11241	0.02031
0.11934	0.00415	0.1178	0.02565	0.11422	0.02031
0.11856	0.00415	0.11749	0.02565	0.11377	0.02031
0.11915	0.00415	0.11804	0.02565	0.11386	0.02035
0.1172	0.00419	0.11834	0.02565	0.1134	0.02035
0.11732	0.00419	0.11936	0.02565	0.11317	0.02035
0.11749	0.00419	0.10829	0.0257	0.11259	0.02035
0.11883	0.00419	0.11824	0.0257	0.11257	0.02035
0.11855	0.00419	0.11718	0.0257	0.11293	0.0204
0.1122	0.00424	0.11811	0.0257	0.11262	0.0204
0.11681	0.00424	0.11847	0.0257	0.11208	0.0204
0.11687	0.00424	0.11857	0.02574	0.11199	0.0204
0.11706	0.00424	0.11875	0.02574	0.11203	0.0204
0.11606	0.00424	0.11856	0.02574	0.11326	0.02045
0.11674	0.00424	0.11848	0.02574	0.11116	0.02045
0.11645	0.00428	0.11945	0.02574	0.11313	0.02045
0.11763	0.00428	0.11958	0.02579	0.11246	0.02045
0.11807	0.00428	0.12935	0.02579	0.1134	0.02049
0.11682	0.00428	0.12036	0.02579	0.11276	0.02049
0.11691	0.00428	0.12032	0.02579	0.1131	0.02049
0.11819	0.00428	0.12017	0.02579	0.11243	0.02049
0.11827	0.00432	0.12164	0.02579	0.11225	0.02049
0.1193	0.00432	0.1179	0.02583	0.10955	0.02054
0.12047	0.00432	0.11921	0.02583	0.11112	0.02054
0.11982	0.00432	0.11958	0.02583	0.11079	0.02054
0.11856	0.00432	0.11986	0.02583	0.11047	0.02054
0.11907	0.00437	0.12027	0.02583	0.11108	0.02054
0.11953	0.00437	0.11024	0.02588	0.10975	0.02058
0.11874	0.00437	0.11847	0.02588	0.11098	0.02058
0.11989	0.00437	0.1193	0.02588	0.11084	0.02058
0.1198	0.00437	0.12009	0.02588	0.11093	0.02058
0.11912	0.00437	0.12071	0.02588	0.11069	0.02058
0.11892	0.00441	0.12089	0.02588	0.11125	0.02063
0.11876	0.00441	0.12099	0.02592	0.11079	0.02063
0.1197	0.00441	0.12229	0.02592	0.11143	0.02063
0.12008	0.00441	0.12032	0.02592	0.11158	0.02063
0.12003	0.00441	0.12106	0.02592	0.1118	0.02063
0.11998	0.00446	0.12149	0.02592	0.11239	0.02067
0.12075	0.00446	0.12219	0.02597	0.11129	0.02067
0.12042	0.00446	0.12152	0.02597	0.11146	0.02067
0.12038	0.00446	0.12101	0.02597	0.11296	0.02067
0.12175	0.00446	0.12009	0.02597	0.11062	0.02072
0.13091	0.0045	0.12182	0.02597	0.11211	0.02072
0.12126	0.0045	0.12124	0.02601	0.11162	0.02072
0.12125	0.0045	0.12143	0.02601	0.11148	0.02072
0.12095	0.0045	0.12108	0.02601	0.11162	0.02072
0.12035	0.0045	0.12136	0.02601	0.11094	0.02077
0.12148	0.00454	0.12064	0.02601	0.11094	0.02077
0.12175	0.00454	0.11569	0.02606	0.11157	0.02077
0.12198	0.00454	0.1215	0.02606	0.11236	0.02077
0.12162	0.00454	0.12055	0.02606	0.11275	0.02077
0.12231	0.00454	0.12126	0.02606	0.11336	0.02081
0.11628	0.00459	0.12233	0.02606	0.11262	0.02081
0.11491	0.00459	0.12191	0.0261	0.11248	0.02081
0.12074	0.00459	0.12122	0.0261	0.11162	0.02081
0.11996	0.00459	0.12169	0.0261	0.1113	0.02081
0.1213	0.00459	0.12113	0.0261	0.11423	0.02086
0.12143	0.00459	0.11976	0.0261	0.11327	0.02086
0.12121	0.00463	0.1279	0.02615	0.11289	0.02086
0.12246	0.00463	0.12155	0.02615	0.11197	0.02086
0.12212	0.00463	0.12219	0.02615	0.11431	0.02086
0.12222	0.00463	0.12009	0.02615	0.11326	0.0209
0.12098	0.00463	0.12127	0.02615	0.11203	0.0209
0.12808	0.00468	0.12219	0.02619	0.11335	0.0209
0.12223	0.00468	0.12182	0.02619	0.11391	0.0209
0.12364	0.00468	0.12256	0.02619	0.11408	0.0209
0.12199	0.00468	0.12183	0.02619	0.11303	0.02095
0.12052	0.00468	0.12219	0.02619	0.1133	0.02095
0.12031	0.00468	0.12324	0.02619	0.11422	0.02095
0.12166	0.00472	0.12096	0.02624	0.11369	0.02095
0.12149	0.00472	0.12183	0.02624	0.11476	0.02099
0.12167	0.00472	0.12145	0.02624	0.11485	0.02099
0.1208	0.00472	0.12223	0.02624	0.11494	0.02099
0.12089	0.00472	0.122	0.02624	0.11564	0.02099
0.11184	0.00476	0.12325	0.02628	0.11532	0.02099
0.12052	0.00476	0.12223	0.02628	0.11441	0.02104
0.1198	0.00476	0.12316	0.02628	0.11534	0.02104
0.12098	0.00476	0.12315	0.02628	0.11492	0.02104
0.1212	0.00476	0.12284	0.02628	0.11482	0.02104
0.11979	0.00481	0.13206	0.02633	0.11446	0.02104
0.12112	0.00481	0.12439	0.02633	0.1145	0.02108
0.12254	0.00481	0.12357	0.02633	0.11405	0.02108
0.12172	0.00481	0.12512	0.02633	0.11459	0.02108
0.12186	0.00481	0.12476	0.02633	0.11469	0.02108
0.12858	0.00485	0.12411	0.02637	0.11308	0.02108
0.12237	0.00485	0.12417	0.02637	0.11439	0.02113
0.12298	0.00485	0.12348	0.02637	0.1146	0.02113
0.12282	0.00485	0.12434	0.02637	0.11341	0.02113
0.12237	0.00485	0.12497	0.02637	0.11408	0.02113
0.1231	0.00489	0.12475	0.02637	0.11482	0.02113
0.12422	0.00489	0.12327	0.02642	0.11439	0.02118
0.1231	0.00489	0.12359	0.02642	0.11431	0.02118
0.12353	0.00489	0.12452	0.02642	0.11437	0.02118
0.12336	0.00489	0.12502	0.02642	0.11395	0.02118
0.12451	0.00489	0.12315	0.02642	0.11447	0.02122
0.12007	0.00494	0.12522	0.02646	0.11552	0.02122
0.1241	0.00494	0.12489	0.02646	0.11359	0.02122
0.12358	0.00494	0.12494	0.02646	0.11382	0.02122
0.12372	0.00494	0.12507	0.02646	0.11373	0.02122
0.12408	0.00494	0.12488	0.02646	0.11276	0.02127
0.12437	0.00498	0.13518	0.02651	0.11317	0.02127
0.12518	0.00498	0.1269	0.02651	0.11437	0.02127
0.12422	0.00498	0.12662	0.02651	0.11381	0.02127
0.12487	0.00498	0.12682	0.02651	0.11442	0.02127
0.12625	0.00498	0.12552	0.02651	0.1145	0.02131
0.12606	0.00503	0.12662	0.02655	0.11462	0.02131
0.12642	0.00503	0.12675	0.02655	0.11391	0.02131
0.12661	0.00503	0.12634	0.02655	0.11464	0.02131
0.12685	0.00503	0.12777	0.02655	0.11326	0.02131
0.12707	0.00507	0.12713	0.02655	0.1141	0.02136
0.12701	0.00507	0.12068	0.0266	0.11344	0.02136
0.12708	0.00507	0.1258	0.0266	0.11501	0.02136
0.12624	0.00507	0.1265	0.0266	0.11541	0.02136
0.12791	0.00507	0.12613	0.0266	0.11385	0.02136
0.12134	0.00511	0.12704	0.0266	0.11399	0.0214
0.12778	0.00511	0.12704	0.0266	0.11369	0.0214
0.12702	0.00511	0.12753	0.02664	0.11414	0.0214
0.12772	0.00511	0.12687	0.02664	0.11424	0.0214
0.12825	0.00511	0.1278	0.02664	0.11469	0.0214
0.12735	0.00511	0.12782	0.02664	0.11446	0.02145
0.12791	0.00516	0.12916	0.02664	0.11427	0.02145
0.12674	0.00516	0.12899	0.02669	0.1145	0.02145
0.12864	0.00516	0.12806	0.02669	0.11363	0.02145
0.12827	0.00516	0.12938	0.02669	0.11459	0.02145
0.14016	0.0052	0.13027	0.02669	0.11487	0.0215
0.12931	0.0052	0.12887	0.02673	0.11531	0.0215
0.12932	0.0052	0.12975	0.02673	0.1146	0.0215
0.12977	0.0052	0.13042	0.02673	0.11504	0.0215
0.12964	0.0052	0.13064	0.02673	0.11534	0.02154
0.12991	0.00525	0.12287	0.02678	0.11497	0.02154
0.1301	0.00525	0.12901	0.02678	0.11693	0.02154
0.13109	0.00525	0.12961	0.02678	0.11628	0.02154
0.13139	0.00525	0.13	0.02678	0.11679	0.02159
0.12928	0.00529	0.12907	0.02678	0.11577	0.02159
0.12963	0.00529	0.12987	0.02682	0.1151	0.02159
0.12984	0.00529	0.12898	0.02682	0.1173	0.02159
0.12894	0.00529	0.13014	0.02682	0.1147	0.02159
0.13047	0.00533	0.13045	0.02682	0.11716	0.02159
0.12872	0.00533	0.1312	0.02687	0.11632	0.02163
0.13032	0.00533	0.13153	0.02687	0.11609	0.02163
0.12976	0.00533	0.13209	0.02687	0.1161	0.02163
0.14099	0.00538	0.1311	0.02687	0.11619	0.02163
0.13011	0.00538	0.1318	0.02691	0.11583	0.02163
0.13105	0.00538	0.13247	0.02691	0.11625	0.02168
0.13192	0.00538	0.13166	0.02691	0.11518	0.02168
0.13338	0.00542	0.12206	0.02695	0.11441	0.02168
0.13141	0.00542	0.1321	0.02695	0.11541	0.02168
0.13151	0.00542	0.13218	0.02695	0.11643	0.02172
0.12223	0.00546	0.13366	0.02695	0.11483	0.02172
0.13113	0.00546	0.13411	0.027	0.11697	0.02172
0.1297	0.00546	0.13448	0.027	0.11515	0.02172
0.12935	0.00546	0.1351	0.027	0.11683	0.02172
0.12981	0.00551	0.14243	0.02704	0.11578	0.02177
0.1302	0.00551	0.13326	0.02704	0.11575	0.02177
0.13021	0.00551	0.13399	0.02704	0.11611	0.02177
0.13862	0.00555	0.13557	0.02704	0.11683	0.02177
0.13288	0.00555	0.13576	0.02709	0.11725	0.02182
0.13239	0.00555	0.13527	0.02709	0.11614	0.02182
0.13247	0.0056	0.13582	0.02709	0.11531	0.02182
0.13288	0.0056	0.13652	0.02713	0.11661	0.02182
0.13252	0.0056	0.13683	0.02713	0.11711	0.02182
0.1278	0.00564	0.13648	0.02713	0.11684	0.02186
0.13221	0.00564	0.13647	0.02718	0.11834	0.02186
0.13193	0.00568	0.13698	0.02718	0.11716	0.02186
0.13275	0.00568	0.13852	0.02718	0.11753	0.02186
0.13175	0.00568	0.13706	0.02722	0.11775	0.02186
0.13175	0.00568	0.13814	0.02722	0.11735	0.02186
0.13295	0.00573	0.13776	0.02727	0.11825	0.02191
0.13316	0.00573	0.13999	0.02727	0.1188	0.02191
0.13263	0.00577	0.13908	0.02727	0.11748	0.02191
0.13257	0.00577	0.13201	0.02731	0.11908	0.02191
0.13294	0.00577	0.1394	0.02731	0.11848	0.02195
0.13093	0.00582	0.13804	0.02731	0.1178	0.02195
0.13266	0.00582	0.14005	0.02736	0.11822	0.02195
0.13331	0.00586	0.13954	0.02736	0.11866	0.02195
0.13388	0.00586	0.14897	0.0274	0.11799	0.02195
0.13458	0.00586	0.14208	0.0274	0.11697	0.022
0.14176	0.0059	0.14246	0.0274	0.11845	0.022
0.13449	0.0059	0.14252	0.02745	0.11876	0.022
0.13414	0.00595	0.14284	0.02745	0.11825	0.022
0.13419	0.00595	0.14215	0.02749	0.11743	0.022
0.13467	0.00595	0.14107	0.02754	0.11908	0.02204
0.13321	0.00599	0.14237	0.02754	0.1185	0.02204
0.13433	0.00599	0.15296	0.02758	0.11873	0.02204
0.13599	0.00604	0.14409	0.02758	0.11866	0.02204
0.13498	0.00604	0.14381	0.02763	0.12013	0.02209
0.14207	0.00608	0.14423	0.02763	0.11879	0.02209
0.13579	0.00608	0.13701	0.02767	0.11912	0.02209
0.1362	0.00608	0.14512	0.02767	0.12027	0.02209
0.13682	0.00612	0.14516	0.02772	0.11873	0.02209
0.13641	0.00612	0.14675	0.02772	0.11834	0.02214
0.13621	0.00617	0.14754	0.02776	0.11815	0.02214
0.1374	0.00617	0.14813	0.02781	0.11902	0.02214
0.13844	0.00621	0.14829	0.02781	0.11875	0.02214
0.13783	0.00621	0.14073	0.02785	0.11931	0.02214
0.14034	0.00625	0.14866	0.02785	0.11843	0.02218
0.13863	0.00625	0.14989	0.0279	0.11725	0.02218
0.13988	0.0063	0.15568	0.02794	0.11839	0.02218
0.139	0.0063	0.15187	0.02799	0.11794	0.02218
0.1323	0.00634	0.1526	0.02799	0.11811	0.02218
0.14017	0.00634	0.14265	0.02803	0.11848	0.02223
0.14151	0.00639	0.1522	0.02803	0.11911	0.02223
0.15344	0.00643	0.15325	0.02808	0.11958	0.02223
0.14208	0.00643	0.16538	0.02812	0.1194	0.02223
0.14147	0.00647	0.1555	0.02817	0.1205	0.02227
0.1423	0.00647	0.15525	0.02817	0.11824	0.02227
0.14051	0.00652	0.15582	0.02821	0.11944	0.02227
0.14328	0.00652	0.15669	0.02826	0.1194	0.02227
0.14356	0.00656	0.16668	0.0283	0.11973	0.02227
0.15257	0.00661	0.15815	0.0283	0.11999	0.02232
0.14258	0.00665	0.15827	0.02834	0.11996	0.02232
0.14389	0.00665	0.15019	0.02839	0.11866	0.02232
0.13193	0.00669	0.15983	0.02839	0.11903	0.02232
0.14343	0.00669	0.15883	0.02843	0.11917	0.02232
0.14399	0.00674	0.16633	0.02848	0.11875	0.02236
0.14507	0.00678	0.16118	0.02852	0.11834	0.02236
0.14483	0.00682	0.15325	0.02857	0.1194	0.02236
0.13691	0.00687	0.16019	0.02861	0.11999	0.02236
0.14346	0.00687	0.1608	0.02861	0.12039	0.02236
0.14502	0.00691	0.16264	0.0287	0.12041	0.02241
0.15401	0.00696	0.16217	0.0287	0.11935	0.02241
0.14608	0.007	0.16257	0.02875	0.11852	0.02241
0.14675	0.007	0.16297	0.02879	0.11808	0.02241
0.14684	0.00709	0.17206	0.02884	0.11926	0.02241
0.14679	0.00709	0.16391	0.02888	0.12083	0.02246
0.14961	0.00713	0.16652	0.02888	0.12071	0.02246
0.14866	0.00718	0.16601	0.02897	0.12037	0.02246
0.14246	0.00722	0.16715	0.02897	0.12017	0.02246
0.14934	0.00726	0.1698	0.02906	0.12059	0.0225
0.1502	0.00726	0.17	0.02906	0.12141	0.0225
0.15216	0.00735	0.16949	0.02915	0.11943	0.0225
0.15178	0.00735	0.16989	0.02915	0.11945	0.0225
0.15066	0.00739	0.17257	0.02924	0.12028	0.0225
0.15041	0.00744	0.17343	0.02924	0.11981	0.02255
0.15469	0.00748	0.17265	0.02933	0.12062	0.02255
0.1542	0.00753	0.1726	0.02933	0.12046	0.02255
0.1527	0.00757	0.18318	0.02938	0.12223	0.02255
0.15266	0.00761	0.16834	0.02947	0.11972	0.02255
0.15425	0.00766	0.16794	0.02947	0.12064	0.02259
0.15362	0.0077	0.18746	0.02956	0.12039	0.02259
0.14649	0.00775	0.17822	0.02956	0.12073	0.02259
0.15378	0.00779	0.16175	0.02965	0.11989	0.02259
0.16294	0.00783	0.17243	0.02965	0.12057	0.02259
0.15273	0.00792	0.18809	0.02974	0.12055	0.02264
0.14835	0.00792	0.17894	0.02978	0.12096	0.02264
0.1636	0.00801	0.17786	0.02983	0.12087	0.02264
0.15764	0.00801	0.17797	0.02987	0.12032	0.02264
0.15085	0.0081	0.18818	0.02991	0.12046	0.02268
0.15764	0.00814	0.17227	0.03	0.12118	0.02268
0.16254	0.00818	0.17273	0.03	0.12122	0.02268
0.15956	0.00823	0.19182	0.03009	0.12104	0.02268
0.15828	0.00827	0.18034	0.03014	0.12059	0.02268
0.15837	0.00832	0.17176	0.03018	0.11995	0.02273
0.16212	0.0084	0.17985	0.03023	0.12068	0.02273
0.15344	0.00845	0.18215	0.03032	0.1208	0.02273
0.16072	0.00849	0.17276	0.03036	0.12101	0.02273
0.16926	0.00854	0.17959	0.03041	0.12219	0.02273
0.16334	0.00858	0.18831	0.03045	0.12117	0.02277
0.16177	0.00867	0.17878	0.0305	0.12161	0.02277
0.17153	0.00871	0.17782	0.03059	0.1214	0.02277
0.15823	0.0088	0.18617	0.03063	0.1221	0.02277
0.16087	0.0088	0.16767	0.03072	0.12283	0.02277
0.172	0.00889	0.17366	0.03077	0.12228	0.02282
0.16346	0.00893	0.1774	0.03086	0.12251	0.02282
0.163	0.00902	0.17099	0.0309	0.12315	0.02282
0.17134	0.00906	0.1911	0.03099	0.12468	0.02287
0.15368	0.00915	0.18261	0.03104	0.12213	0.02287
0.16182	0.00919	0.18031	0.03113	0.12411	0.02287
0.17349	0.00924	0.18929	0.03117	0.12274	0.02287
0.16403	0.00928	0.18544	0.03122	0.12428	0.02291
0.16295	0.00932	0.18214	0.0313	0.12389	0.02291
0.16807	0.00946	0.19442	0.03135	0.12387	0.02291
0.16728	0.00946	0.18004	0.03144	0.12352	0.02291
0.17347	0.00959	0.1867	0.03148	0.12361	0.02291
0.16972	0.00963	0.19029	0.03157	0.12352	0.02296
0.1663	0.00968	0.1802	0.03162	0.12475	0.02296
0.17471	0.00976	0.19679	0.03171	0.1239	0.02296
0.16632	0.00985	0.19076	0.03175	0.12438	0.02296
0.17271	0.00989	0.18913	0.03184	0.12503	0.023
0.17622	0.00998	0.19918	0.03189	0.12508	0.023
0.1689	0.01003	0.18068	0.03198	0.1248	0.023
0.17469	0.01007	0.19368	0.03202	0.12484	0.023
0.17712	0.01016	0.1891	0.03216	0.1253	0.023
0.16989	0.0102	0.18865	0.03216	0.12516	0.02305
0.1903	0.01029	0.19614	0.03229	0.1247	0.02305
0.17928	0.01033	0.18808	0.03234	0.12512	0.02305
0.17833	0.01042	0.20654	0.03243	0.12461	0.02305
0.18692	0.01046	0.19908	0.03247	0.12545	0.02309
0.17673	0.0106	0.18932	0.03252	0.12447	0.02309
0.17934	0.0106	0.2122	0.03261	0.12597	0.02314
0.17036	0.01073	0.19899	0.0327	0.12516	0.02314
0.17999	0.01077	0.21032	0.03278	0.12471	0.02314
0.18114	0.01086	0.2039	0.03283	0.12338	0.02314
0.17176	0.0109	0.20348	0.03292	0.12462	0.02314
0.18717	0.01099	0.20967	0.03301	0.12484	0.02319
0.17311	0.01108	0.20482	0.0331	0.12438	0.02319
0.18267	0.01112	0.21125	0.03314	0.12517	0.02319
0.18552	0.01121	0.19259	0.03323	0.12572	0.02319
0.17865	0.0113	0.2091	0.03332	0.12661	0.02323
0.19021	0.01139	0.19482	0.03341	0.12466	0.02323
0.17944	0.01143	0.20583	0.03346	0.1247	0.02328
0.19679	0.01152	0.21575	0.03355	0.12389	0.02328
0.1881	0.01156	0.20624	0.03364	0.12406	0.02328
0.19588	0.01169	0.21703	0.03368	0.12415	0.02328
0.18855	0.01174	0.20675	0.03382	0.12567	0.02332
0.18951	0.01182	0.22377	0.03386	0.12389	0.02332
0.19185	0.01191	0.20531	0.03395	0.12466	0.02332
0.19067	0.012	0.22349	0.03404	0.12466	0.02332
0.19919	0.01204	0.20656	0.03413	0.12516	0.02332
0.19048	0.01218	0.22498	0.03422	0.12503	0.02337
0.20003	0.01222	0.21362	0.03431	0.12479	0.02341
0.18419	0.01235	0.2215	0.03435	0.12454	0.02341
0.20362	0.01239	0.22964	0.03444	0.1248	0.02341
0.19399	0.01244	0.21925	0.03453	0.12664	0.02341
0.20083	0.01257	0.23357	0.03458	0.12479	0.02341
0.19506	0.01261	0.22117	0.03471	0.12535	0.02346
0.20471	0.01275	0.23211	0.03476	0.12457	0.02346
0.19613	0.01279	0.21927	0.03485	0.12431	0.02346
0.20288	0.01292	0.23558	0.03494	0.12548	0.02346
0.19633	0.01296	0.22141	0.03507	0.1253	0.02346
0.20668	0.0131	0.23362	0.03512	0.12512	0.02351
0.19689	0.01314	0.21833	0.03521	0.12562	0.02351
0.20683	0.01327	0.2371	0.0353	0.12521	0.02351
0.19277	0.01336	0.22124	0.03539	0.12586	0.02351
0.20721	0.01345	0.23932	0.03547	0.12758	0.02355
0.19178	0.01354	0.23047	0.03552	0.12553	0.02355
0.19892	0.01358	0.24255	0.03565	0.12731	0.02355
0.19221	0.01371	0.23315	0.0357	0.12627	0.0236
0.20154	0.01375	0.24029	0.03583	0.12687	0.0236
0.19543	0.01389	0.22841	0.03592	0.12776	0.0236
0.20355	0.01393	0.24175	0.03601	0.12611	0.02364
0.1946	0.01406	0.23513	0.03606	0.12636	0.02364
0.21407	0.01415	0.24474	0.03619	0.12461	0.02364
0.19753	0.01428	0.23541	0.03624	0.12375	0.02364
0.21406	0.01432	0.24558	0.03637	0.12383	0.02364
0.21296	0.0145	0.22892	0.03646	0.12415	0.02369
0.21099	0.01454	0.24693	0.0366	0.12369	0.02369
0.2145	0.01468	0.23357	0.03664	0.12415	0.02369
0.20875	0.01472	0.2445	0.03673	0.12389	0.02369
0.21678	0.01485	0.23141	0.03682	0.12278	0.02373
0.20092	0.01494	0.24987	0.03691	0.1247	0.02373
0.20802	0.01498	0.2346	0.03704	0.12364	0.02373
0.20069	0.01516	0.25153	0.03709	0.12343	0.02373
0.21771	0.0152	0.23936	0.03722	0.12346	0.02373
0.20824	0.01533	0.25336	0.03727	0.12315	0.02373
0.22181	0.01542	0.24293	0.0374	0.12406	0.02378
0.21539	0.01555	0.25217	0.03749	0.12159	0.02382
0.21427	0.0156	0.25541	0.03763	0.12292	0.02382
0.22568	0.01577	0.23963	0.03772	0.12166	0.02382
0.20867	0.01582	0.25569	0.03785	0.12187	0.02382
0.21776	0.01595	0.23981	0.0379	0.12215	0.02382
0.20932	0.01604	0.25354	0.03799	0.12275	0.02387
0.21108	0.01617	0.23801	0.03808	0.12357	0.02387
0.22252	0.01625	0.25924	0.03817	0.12424	0.02387
0.21285	0.01639	0.25614	0.03835	0.12259	0.02387
0.232	0.01647	0.25543	0.03839	0.12366	0.02387
0.23118	0.01661	0.26809	0.03852	0.12448	0.02392
0.22366	0.01665	0.24075	0.03861	0.12352	0.02392
0.22087	0.01674	0.25769	0.03875	0.12392	0.02392
0.21682	0.01691	0.25005	0.03884	0.12315	0.02392
0.23559	0.01696	0.26675	0.03888	0.12364	0.02392
0.23355	0.01713	0.2665	0.03906	0.12369	0.02396
0.23018	0.01717	0.26545	0.03911	0.12508	0.02396
0.23666	0.01735	0.26813	0.03929	0.12301	0.02396
0.22106	0.01739	0.25489	0.03933	0.12385	0.02396
0.22316	0.01757	0.26522	0.03947	0.12362	0.02396
0.23509	0.01766	0.25498	0.03956	0.12346	0.02401
0.22149	0.01779	0.24648	0.03969	0.12387	0.02401
0.2429	0.01783	0.26006	0.03978	0.12415	0.02401
0.24244	0.01801	0.25013	0.03991	0.12468	0.02401
0.23642	0.01805	0.25906	0.04	0.12461	0.02405
0.24414	0.01823	0.26634	0.04014	0.12392	0.02405
0.22926	0.01832	0.24896	0.04023	0.12502	0.02405
0.22922	0.01845	0.25418	0.04041	0.12466	0.02405
0.24402	0.01853	0.26075	0.04045	0.12517	0.02405
0.22954	0.01862	0.25888	0.04063	0.12475	0.0241
0.24264	0.01875	0.27462	0.04072	0.12476	0.0241
0.23588	0.01884	0.25711	0.04077	0.12489	0.0241
0.23285	0.01902	0.26134	0.04099	0.12493	0.0241
0.25359	0.01911	0.27871	0.04108	0.12554	0.0241
0.2349	0.01919	0.27712	0.04122	0.12392	0.02414
0.23519	0.01937	0.26771	0.0413	0.12526	0.02414
0.25396	0.01941	0.272	0.04148	0.12567	0.02414
0.2587	0.01959	0.28399	0.04157	0.12622	0.02419
0.24333	0.01968	0.27475	0.04171	0.1253	0.02419
0.24609	0.01985	0.29251	0.0418	0.12708	0.02419
0.25798	0.01994	0.27437	0.04189	0.1269	0.02424
0.24871	0.02003	0.27674	0.04202	0.12752	0.02424
0.24715	0.0202	0.29162	0.04211	0.12837	0.02428
0.24628	0.02025	0.27797	0.0422	0.12796	0.02433
0.26313	0.02033	0.27945	0.04238	0.12946	0.02433
0.26257	0.02051	0.28508	0.04243	0.12887	0.02433
0.24962	0.0206	0.28875	0.04265	0.12871	0.02433
0.25047	0.02077	0.27831	0.04274	0.12906	0.02433
0.26994	0.02086	0.29399	0.04287	0.1278	0.02437
0.25476	0.02095	0.27555	0.04296	0.1279	0.02437
0.25259	0.02108	0.29144	0.04305	0.12843	0.02437
0.27305	0.02117	0.2825	0.04328	0.12842	0.02442
0.27466	0.02134	0.27789	0.04332	0.13018	0.02442
0.25166	0.02143	0.2973	0.04341	0.12975	0.02442
0.27249	0.02152	0.28535	0.04364	0.13014	0.02446
0.27177	0.02174	0.29275	0.04373	0.1311	0.02446
0.26248	0.02178	0.28075	0.04386	0.13112	0.02446
0.25781	0.02196	0.28848	0.044	0.13121	0.02446
0.27721	0.02209	0.29629	0.04409	0.13153	0.02451
0.27591	0.02222	0.3015	0.04426	0.13115	0.02451
0.2634	0.02231	0.28499	0.04435	0.13246	0.02451
0.26393	0.02235	0.28982	0.04453	0.13335	0.02456
0.26659	0.02248	0.30689	0.04462	0.13329	0.02456
0.28363	0.02261	0.28882	0.04476	0.13283	0.0246
0.2697	0.0227	0.29197	0.04489	0.13335	0.0246
0.27021	0.02283	0.30973	0.04503	0.13567	0.02465
0.2897	0.02292	0.29799	0.04512	0.1342	0.02465
0.29136	0.02314	0.30036	0.0453	0.13512	0.02469
0.27005	0.02323	0.31619	0.04539	0.13487	0.02469
0.27212	0.02336	0.32154	0.04556	0.1349	0.02469
0.29111	0.02349	0.30745	0.04565	0.13752	0.02474
0.27609	0.02358	0.30754	0.04579	0.1352	0.02474
0.27517	0.02371	0.31926	0.04592	0.13757	0.02478
0.2965	0.02384	0.3206	0.04606	0.13843	0.02478
0.27567	0.02393	0.32424	0.04624	0.13896	0.02483
0.28434	0.02411	0.31445	0.04633	0.14106	0.02487
0.29753	0.02419	0.32438	0.04642	0.14025	0.02487
0.29588	0.02437	0.33027	0.0466	0.14042	0.02487
0.2979	0.0245	0.31234	0.04673	0.1409	0.02492
0.28272	0.02459	0.31417	0.04687	0.14152	0.02497
0.28583	0.02476	0.33362	0.047	0.14052	0.02497
0.30334	0.02485	0.30669	0.04709	0.14396	0.02501
0.302	0.02507	0.31288	0.04727	0.14273	0.02501
0.28984	0.02511	0.32713	0.04736	0.14403	0.02506
0.30472	0.0252	0.33324	0.04754	0.14353	0.0251
0.30803	0.02542	0.31326	0.04763	0.14464	0.0251
0.2857	0.02551	0.32175	0.04776	0.14538	0.02515
0.28745	0.02568	0.32167	0.04794	0.14493	0.02519
0.30309	0.02582	0.3399	0.04803	0.14698	0.02524
0.30816	0.02595	0.34243	0.04826	0.14599	0.02524
0.30975	0.02608	0.32543	0.04834	0.14736	0.02524
0.2946	0.02617	0.32468	0.04852	0.14711	0.02529
0.30274	0.02639	0.34487	0.04861	0.14875	0.02533
0.31849	0.02643	0.33489	0.04875	0.14873	0.02533
0.30618	0.02656	0.33501	0.04893	0.14878	0.02538
0.30467	0.02674	0.33255	0.04902	0.14978	0.02542
0.32212	0.02682	0.33487	0.0492	0.15028	0.02547
0.32499	0.027	0.35013	0.04929	0.15039	0.02551
0.32115	0.02713	0.33581	0.04938	0.15043	0.02551
0.32189	0.02731	0.33433	0.0496	0.15006	0.02556
0.30913	0.02739	0.35332	0.04969	0.15076	0.02561
0.32726	0.02748	0.34797	0.04991	0.15171	0.02561
0.32647	0.0277	0.34963	0.05	0.15271	0.02565
0.31469	0.02775	0.34634	0.05009	0.15261	0.0257
0.32819	0.02788	0.33755	0.05027	0.15332	0.02574
0.31262	0.0281	0.35446	0.05041	0.1546	0.02579
0.32724	0.02818	0.35603	0.05059	0.15496	0.02579
0.33037	0.02836	0.33992	0.05068	0.15592	0.02588
0.31168	0.02849	0.34205	0.05081	0.15581	0.02588
0.32627	0.02858	0.34572	0.05099	0.15679	0.02597
0.328	0.02875	0.36182	0.05113	0.15702	0.02597
0.3225	0.02889	0.35999	0.0513	0.15845	0.02602
0.33177	0.0291	0.34194	0.05139	0.15931	0.02606
0.31324	0.02919	0.35307	0.05153	0.16126	0.02611
0.33265	0.02928	0.34753	0.05175	0.16104	0.02615
0.3199	0.0295	0.36404	0.0518	0.16039	0.0262
0.33667	0.02959	0.36683	0.05202	0.16167	0.02624
0.3381	0.02981	0.36352	0.05216	0.16308	0.02629
0.32552	0.02989	0.37	0.05234	0.16322	0.02634
0.33226	0.03003	0.35292	0.05247	0.16229	0.02638
0.32978	0.0302	0.36896	0.05256	0.16236	0.02643
0.34655	0.03029	0.36242	0.05278	0.16385	0.02647
0.34635	0.03051	0.36944	0.05287	0.16428	0.02652
0.33041	0.0306	0.37257	0.0531	0.16478	0.02656
0.33946	0.03073	0.35464	0.05319	0.16571	0.02661
0.33318	0.03095	0.36562	0.05332	0.16671	0.02666
0.3472	0.03099	0.3567	0.05355	0.16577	0.0267
0.3497	0.03125	0.37553	0.05364	0.1667	0.02679
0.35057	0.03134	0.36417	0.05386	0.16796	0.02679
0.35267	0.03152	0.38071	0.054	0.16981	0.02684
0.33917	0.03165	0.36108	0.05408	0.16917	0.02693
0.35741	0.03178	0.36685	0.05431	0.17034	0.02698
0.34804	0.03196	0.36262	0.0544	0.17301	0.02702
0.36226	0.03204	0.36222	0.05462	0.172	0.02707
0.34594	0.03218	0.37831	0.05476	0.17043	0.02711
0.3623	0.03239	0.3802	0.05485	0.17334	0.02716
0.35214	0.03248	0.37739	0.05512	0.17539	0.0272
0.34824	0.0327	0.37126	0.05521	0.17664	0.0273
0.35705	0.03283	0.38654	0.05543	0.17817	0.02734
0.35014	0.03301	0.37958	0.05557	0.18023	0.02739
0.36378	0.03314	0.38722	0.05574	0.18136	0.02748
0.34907	0.03323	0.37034	0.05588	0.18041	0.02748
0.35992	0.03345	0.37754	0.05601	0.1847	0.02757
0.35761	0.03354	0.37597	0.05624	0.18466	0.02762
0.37336	0.03367	0.39652	0.05633	0.18418	0.02766
0.37623	0.03384	0.39704	0.05646	0.18699	0.02775
0.37223	0.03397	0.39918	0.05669	0.18493	0.02775
0.37865	0.03419	0.37946	0.05678	0.18474	0.0278
0.36152	0.03428	0.39957	0.05704	0.1853	0.02789
0.37951	0.03454	0.39471	0.05718	0.18655	0.02793
0.3615	0.03463	0.40697	0.05736	0.18332	0.02803
0.36785	0.03476	0.38935	0.05749	0.18608	0.02807
0.37129	0.03494	0.39717	0.05763	0.18718	0.02816
0.38356	0.03507	0.39279	0.05785	0.18811	0.02821
0.38528	0.03525	0.41454	0.05794	0.18899	0.02825
0.38694	0.03538	0.41084	0.05808	0.18841	0.02835
0.37208	0.03551	0.41777	0.0583	0.18908	0.02835
0.39176	0.03573	0.40042	0.05839	0.19047	0.02848
0.37576	0.03582	0.42158	0.05866	0.19092	0.02853
0.37449	0.03603	0.41066	0.05879	0.19189	0.02853
0.37567	0.03617	0.42543	0.05897	0.19366	0.02862
0.3949	0.0363	0.40643	0.05911	0.19366	0.02871
0.39829	0.03647	0.42187	0.05924	0.19344	0.02876
0.39492	0.0366	0.41326	0.05942	0.19513	0.0288
0.38084	0.03674	0.42791	0.05956	0.19643	0.02889
0.38602	0.03696	0.42538	0.05969	0.19716	0.02898
0.38137	0.03704	0.43126	0.05991	0.19887	0.02903
0.39829	0.03731	0.41824	0.06	0.20097	0.02912
0.40084	0.03739	0.4365	0.06027	0.20248	0.02917
0.38924	0.03761	0.42683	0.06041	0.20231	0.02921
0.39451	0.03775	0.41878	0.0605	0.2011	0.0293
0.40169	0.03783	0.42325	0.06072	0.20289	0.02935
0.40717	0.03805	0.42827	0.06086	0.20394	0.0294
0.40795	0.03818	0.42214	0.06104	0.20274	0.02949
0.41247	0.0384	0.44363	0.06117	0.20273	0.02953
0.40364	0.03854	0.43797	0.0613	0.20197	0.02967
0.39623	0.03867	0.44068	0.06157	0.20312	0.02972
0.39942	0.03884	0.42896	0.06162	0.2042	0.02976
0.40082	0.03897	0.44846	0.06189	0.20492	0.02985
0.40773	0.03924	0.44964	0.06202	0.20622	0.0299
0.40138	0.03932	0.45264	0.06225	0.20652	0.03003
0.4196	0.03941	0.44339	0.06238	0.20704	0.03008
0.41199	0.03968	0.44401	0.06247	0.20752	0.03013
0.42365	0.03981	0.44452	0.06269	0.208	0.03022
0.42592	0.03998	0.45859	0.06283	0.21125	0.03026
0.42223	0.04011	0.47087	0.06292	0.21134	0.0304
0.40942	0.04025	0.47145	0.06314	0.21187	0.03045
0.41626	0.04046	0.45915	0.06328	0.21525	0.03049
0.41412	0.0406	0.48024	0.0635	0.21406	0.03063
0.43071	0.04082	0.47469	0.06364	0.21592	0.03067
0.41716	0.0409	0.48042	0.06382	0.21586	0.03077
0.43198	0.04117	0.46541	0.06395	0.21693	0.03086
0.41645	0.0413	0.47368	0.06409	0.21864	0.0309
0.43406	0.04139	0.46903	0.06426	0.2194	0.03099
0.4238	0.04165	0.48968	0.0644	0.22094	0.03104
0.43994	0.04174	0.47273	0.06453	0.22255	0.03118
0.423	0.04196	0.48601	0.06471	0.22498	0.03122
0.43978	0.04209	0.47273	0.06485	0.22387	0.03127
0.43794	0.04222	0.48684	0.06507	0.22502	0.0314
0.44125	0.04244	0.4745	0.06516	0.22381	0.03145
0.43634	0.04257	0.4746	0.06539	0.22511	0.03159
0.43947	0.04283	0.47592	0.06552	0.22553	0.03163
0.43409	0.04292	0.4948	0.06565	0.22516	0.03172
0.43164	0.04305	0.49265	0.06588	0.22732	0.03182
0.44636	0.04332	0.49534	0.06597	0.22745	0.03186
0.4374	0.04345	0.50227	0.06619	0.22963	0.032
0.45033	0.04367	0.48865	0.06633	0.22902	0.03204
0.44086	0.0438	0.48758	0.06642	0.2314	0.03218
0.45601	0.04402	0.48871	0.06664	0.2313	0.03223
0.44528	0.04415	0.5067	0.06678	0.2332	0.03227
0.44146	0.04428	0.49366	0.067	0.23452	0.03241
0.44414	0.0445	0.50661	0.06713	0.23706	0.0325
0.44539	0.04463	0.49748	0.06718	0.23618	0.03259
0.45232	0.04476	0.51318	0.06745	0.23953	0.03268
0.44575	0.04498	0.5014	0.06758	0.23966	0.03273
0.46012	0.04511	0.51627	0.06776	0.24138	0.03287
0.455	0.04538	0.50185	0.0679	0.24089	0.03291
0.44868	0.04551	0.51293	0.06803	0.24273	0.03305
0.45932	0.04573	0.50113	0.06821	0.24139	0.03314
0.4521	0.04586	0.52205	0.06834	0.24211	0.03319
0.45997	0.04599	0.50155	0.06857	0.24029	0.03332
0.4542	0.04621	0.5191	0.06866	0.2409	0.03337
0.45592	0.04634	0.50564	0.06879	0.23922	0.03351
0.47405	0.04665	0.52363	0.06902	0.24182	0.0336
0.45974	0.04674	0.50775	0.06915	0.24256	0.03364
0.47224	0.04687	0.51459	0.06938	0.24631	0.03378
0.46828	0.04713	0.51144	0.06947	0.24283	0.03382
0.46672	0.04722	0.52955	0.0696	0.24637	0.03401
0.47725	0.04748	0.51448	0.06982	0.24259	0.03405
0.46696	0.04766	0.53288	0.06996	0.24586	0.0341
0.46347	0.04779	0.51918	0.07018	0.24597	0.03428
0.47536	0.04801	0.53501	0.07027	0.25029	0.03433
0.46598	0.04814	0.52994	0.07054	0.24902	0.03446
0.47876	0.04845	0.53901	0.07068	0.24845	0.03456
0.46802	0.04853	0.51985	0.07077	0.24885	0.03465
0.47077	0.04867	0.53361	0.07099	0.25092	0.03478
0.48547	0.04893	0.52532	0.07113	0.25197	0.03483
0.47047	0.04902	0.53069	0.0713	0.25316	0.03501
0.47997	0.04932	0.53391	0.07144	0.25601	0.03506
0.49045	0.04946	0.54732	0.07157	0.25297	0.03515
0.49142	0.04963	0.53445	0.0718	0.25381	0.03529
0.48619	0.04985	0.55367	0.07189	0.25401	0.03538
0.49488	0.04998	0.54186	0.07216	0.25764	0.03547
0.47799	0.05025	0.55694	0.07229	0.25997	0.03561
0.48704	0.05038	0.54132	0.07234	0.26111	0.03565
0.49669	0.05051	0.55308	0.07261	0.26288	0.03583
0.48678	0.05082	0.53936	0.07274	0.26185	0.03593
0.49272	0.0509	0.54418	0.07292	0.26373	0.03597
0.49784	0.05121	0.5491	0.07305	0.26138	0.03611
0.48947	0.05134	0.5648	0.07319	0.26181	0.0362
0.48462	0.05147	0.56022	0.07341	0.26321	0.03634
0.50177	0.05174	0.56494	0.0735	0.2587	0.03643
0.50125	0.05187	0.55411	0.07377	0.26243	0.03652
0.49325	0.05217	0.56929	0.07391	0.25753	0.03666
0.50719	0.05231	0.55192	0.074	0.25945	0.03675
0.51182	0.05244	0.56857	0.07422	0.26078	0.03693
0.50479	0.05275	0.55586	0.07435	0.25811	0.03698
0.50042	0.05288	0.56722	0.07449	0.25921	0.03716
0.51844	0.05314	0.56146	0.07467	0.26483	0.03725
0.51472	0.05327	0.57882	0.0748	0.26315	0.03734
0.50881	0.05345	0.56499	0.07507	0.26655	0.03752
0.52531	0.05367	0.57917	0.07521	0.26809	0.03762
0.52591	0.05384	0.57256	0.0753	0.26995	0.03771
0.50989	0.0541	0.59308	0.07552	0.27288	0.03784
0.5293	0.05419	0.58938	0.07565	0.27125	0.03793
0.5309	0.05437	0.5926	0.07588	0.27149	0.03812
0.51574	0.05463	0.57623	0.07597	0.27504	0.03821
0.52976	0.05476	0.58222	0.0761	0.27516	0.03825
0.53751	0.05503	0.58191	0.07633	0.27567	0.03844
0.53062	0.0552	0.60301	0.07642	0.28066	0.03853
0.53402	0.05529	0.58346	0.07669	0.28041	0.03871
0.54212	0.0556	0.6026	0.07682	0.27294	0.0388
0.53863	0.05573	0.58799	0.07687	0.27236	0.03889
0.55372	0.05595	0.61087	0.07713	0.27679	0.03908
0.55271	0.05608	0.59293	0.07722	0.27782	0.03912
0.54754	0.05625	0.60985	0.07745	0.27804	0.0393
0.55862	0.05647	0.59971	0.07758	0.27963	0.0394
0.55401	0.0566	0.59917	0.07776	0.28132	0.03953
0.54972	0.05687	0.60896	0.0779	0.28549	0.03967
0.56443	0.05704	0.62104	0.07799	0.28327	0.03976
0.55494	0.05726	0.62098	0.07821	0.28296	0.03994
0.56273	0.05739	0.60718	0.07834	0.28703	0.04003
0.56756	0.05753	0.62675	0.07857	0.28368	0.04013
0.55363	0.05775	0.61508	0.0787	0.28987	0.04031
0.56981	0.05788	0.63222	0.07875	0.29088	0.0404
0.56699	0.05805	0.61503	0.07902	0.29191	0.04058
0.5655	0.05827	0.63052	0.07911	0.29056	0.04067
0.5739	0.0584	0.61885	0.07933	0.29511	0.04077
0.56058	0.05871	0.63536	0.07947	0.29759	0.04095
0.56304	0.0588	0.61898	0.07956	0.29618	0.04104
0.57124	0.05906	0.63271	0.07978	0.29734	0.04122
0.56033	0.05924	0.62112	0.07987	0.2975	0.04131
0.55907	0.05937	0.63527	0.08014	0.29573	0.0414
0.56925	0.05959	0.62578	0.08027	0.29716	0.04159
0.56766	0.05976	0.64484	0.08032	0.30311	0.04168
0.56006	0.05989	0.63683	0.08059	0.30206	0.04191
0.57811	0.06016	0.64317	0.08068	0.30639	0.042
0.57321	0.06029	0.64322	0.0809	0.30749	0.04204
0.56373	0.0606	0.6358	0.08104	0.30657	0.04227
0.5812	0.06068	0.64918	0.08122	0.30875	0.04236
0.57118	0.06099	0.63307	0.08135	0.30302	0.04255
0.56923	0.06112	0.64297	0.08148	0.30097	0.04264
0.57831	0.06125	0.63606	0.08171	0.30358	0.04273
0.57628	0.06152	0.65368	0.0818	0.30405	0.04291
0.57348	0.06165	0.64214	0.08193	0.30338	0.043
0.58943	0.06191	0.66045	0.08216	0.30298	0.04323
0.58423	0.06204	0.64604	0.08225	0.30506	0.04332
0.57763	0.06218	0.66301	0.08247	0.30808	0.04351
0.58488	0.06248	0.64429	0.08261	0.30843	0.04364
0.58978	0.06257	0.6531	0.08278	0.30622	0.04373
0.58335	0.06288	0.65512	0.08292	0.30624	0.04392
0.58593	0.06305	0.67264	0.08305	0.30861	0.04405
0.59479	0.06318	0.65364	0.08328	0.30839	0.04414
0.59095	0.06345	0.67186	0.08337	0.31045	0.04433
0.5894	0.06358	0.6586	0.0835	0.31282	0.04442
0.59595	0.06371	0.68115	0.08373	0.3092	0.04465
0.60012	0.06397	0.67071	0.08382	0.31186	0.04478
0.59448	0.06411	0.66679	0.08404	0.31206	0.04483
0.60825	0.06441	0.68674	0.08413	0.31394	0.04506
0.61685	0.06454	0.68079	0.08435	0.3145	0.04519
0.60311	0.06481	0.69014	0.08444	0.31118	0.04538
0.61597	0.06494	0.69532	0.08467	0.3147	0.04551
0.62819	0.06507	0.67766	0.08476	0.31521	0.04561
0.61016	0.06533	0.68617	0.08489	0.3192	0.04583
0.61957	0.06546	0.67922	0.08512	0.31834	0.04593
0.63453	0.0656	0.70124	0.08521	0.32329	0.04615
0.61808	0.06586	0.68861	0.08543	0.3272	0.04629
0.62957	0.06599	0.69854	0.08552	0.33033	0.04638
0.63489	0.06625	0.68209	0.08565	0.33422	0.04661
0.61981	0.06639	0.68604	0.08588	0.33285	0.0467
0.64057	0.06665	0.68711	0.08597	0.33382	0.04684
0.64183	0.06678	0.69488	0.08624	0.33293	0.04707
0.63323	0.06696	0.71211	0.08628	0.33664	0.04711
0.6512	0.06717	0.6973	0.08651	0.34006	0.04734
0.64593	0.06731	0.7113	0.08664	0.34203	0.04748
0.64678	0.06757	0.71769	0.08682	0.33149	0.04766
0.65273	0.0677	0.71353	0.08695	0.32874	0.04775
0.64906	0.06783	0.70643	0.08704	0.33341	0.04789
0.64416	0.0681	0.70262	0.08722	0.33954	0.04812
0.65894	0.06818	0.72199	0.08736	0.34254	0.04821
0.64464	0.06849	0.70544	0.08758	0.34028	0.0483
0.65424	0.06862	0.72297	0.08772	0.34359	0.04853
0.66264	0.06871	0.71201	0.08776	0.34806	0.04862
0.65501	0.06897	0.72297	0.08803	0.34845	0.04885
0.66942	0.06915	0.71408	0.08812	0.34952	0.04898
0.6586	0.06937	0.71397	0.0883	0.35211	0.04917
0.66869	0.0695	0.73201	0.08843	0.35288	0.0493
0.67799	0.06963	0.72024	0.08866	0.35415	0.0494
0.66975	0.06985	0.72808	0.08875	0.35576	0.04962
0.68255	0.06998	0.73873	0.08897	0.35958	0.04972
0.67124	0.07029	0.72496	0.08906	0.35976	0.04985
0.66798	0.07042	0.74078	0.08915	0.36375	0.05008
0.68569	0.07051	0.73171	0.08938	0.36484	0.05017
0.67407	0.07077	0.75106	0.08947	0.36718	0.0504
0.67669	0.0709	0.75022	0.08969	0.36781	0.05049
0.67325	0.07112	0.72999	0.08978	0.36902	0.05072
0.67745	0.07125	0.74797	0.09	0.37144	0.05081
0.69078	0.07139	0.73062	0.09009	0.36996	0.05095
0.67946	0.07165	0.73166	0.09032	0.37127	0.05113
0.69101	0.07178	0.7486	0.09041	0.37	0.05127
0.68541	0.07204	0.74171	0.09063	0.37083	0.05136
0.68924	0.07213	0.75603	0.09072	0.36976	0.05159
0.70167	0.07226	0.74014	0.09086	0.37338	0.05168
0.68474	0.07253	0.75382	0.09108	0.37352	0.05195
0.68395	0.0727	0.74248	0.09117	0.37775	0.05204
0.69153	0.07292	0.75592	0.0913	0.38009	0.05227
0.68707	0.07305	0.73946	0.09153	0.3819	0.05236
0.70494	0.07327	0.75406	0.09166	0.38378	0.0525
0.69185	0.07345	0.76068	0.09184	0.3847	0.05268
0.69515	0.07358	0.76587	0.09198	0.38803	0.05282
0.70928	0.07384	0.74964	0.09211	0.38734	0.05296
0.69757	0.07393	0.76873	0.09234	0.39223	0.05314
0.71933	0.07419	0.75764	0.09243	0.39322	0.05323
0.71662	0.07437	0.7681	0.09252	0.39652	0.0535
0.70499	0.0745	0.76001	0.09278	0.39787	0.05355
0.72064	0.07472	0.77366	0.09292	0.40078	0.05383
0.71273	0.07485	0.77606	0.0931	0.4032	0.05392
0.70378	0.07498	0.75968	0.09323	0.40492	0.05405
0.72014	0.0752	0.75825	0.09332	0.40679	0.05424
0.71277	0.07538	0.75907	0.09355	0.40731	0.05437
0.72563	0.07564	0.77512	0.09368	0.41108	0.05456
0.73526	0.07577	0.75795	0.09391	0.41469	0.05465
0.71751	0.07586	0.7694	0.09404	0.41531	0.05478
0.7395	0.07612	0.75893	0.09408	0.41679	0.05501
0.73526	0.07625	0.78269	0.09435	0.41576	0.0551
0.74019	0.07647	0.77619	0.09449	0.42093	0.05533
0.7442	0.07665	0.78501	0.09467	0.42039	0.05542
0.73335	0.07678	0.768	0.0948	0.42052	0.05551
0.73821	0.07704	0.7775	0.09494	0.42227	0.05574
0.73606	0.07713	0.76949	0.09512	0.42425	0.05588
0.73709	0.07739	0.78504	0.09525	0.42614	0.05606
0.75064	0.07753	0.77159	0.09552	0.42534	0.05615
0.7329	0.07761	0.78913	0.09561	0.42753	0.05629
0.75229	0.07788	0.77223	0.0957	0.42918	0.05647
0.74877	0.07805	0.78882	0.09597	0.42766	0.05661
0.74031	0.07827	0.78313	0.0961	0.42831	0.05684
0.74751	0.0784	0.79482	0.09628	0.42875	0.05698
0.74188	0.07853	0.77447	0.09642	0.42969	0.05707
0.74925	0.07875	0.77959	0.09655	0.43001	0.05729
0.7522	0.07893	0.7792	0.09682	0.43182	0.05743
0.73754	0.07919	0.79373	0.09691	0.43085	0.05762
0.74633	0.07932	0.78039	0.09713	0.43475	0.05775
0.75653	0.07941	0.78386	0.09727	0.43296	0.05784
0.74506	0.07972	0.79865	0.0974	0.43739	0.05807
0.75958	0.07985	0.79005	0.09763	0.43638	0.05816
0.75116	0.08007	0.7971	0.09776	0.43609	0.05844
0.75414	0.0802	0.78627	0.0979	0.43553	0.05853
0.7657	0.08038	0.80247	0.09812	0.43712	0.05876
0.75587	0.0806	0.78108	0.09821	0.4365	0.05889
0.76378	0.08073	0.80278	0.09848	0.43543	0.05903
0.76927	0.08099	0.80437	0.09861	0.43473	0.05921
0.75908	0.08112	0.79383	0.0987	0.43647	0.05935
0.77258	0.08125	0.80009	0.09897	0.43902	0.05958
0.76554	0.08152	0.78899	0.09911	0.43955	0.05972
0.76335	0.08165	0.79817	0.09933	0.43943	0.05985
0.7805	0.08187	0.79473	0.09947	0.44218	0.06008
0.77241	0.08204	0.80609	0.0996	0.44085	0.06017
0.78729	0.08226	0.80023	0.09983	0.44231	0.06045
0.78001	0.08239	0.8114	0.09996	0.44298	0.06058
0.77128	0.08253	0.8042	0.10023	0.44577	0.06067
0.79026	0.08279	0.80782	0.10036	0.44645	0.06095
0.77657	0.08292	0.80782	0.10054	0.44987	0.06108
0.77814	0.08305	0.81297	0.10068	0.45201	0.06127
0.79299	0.08332	0.8258	0.10081	0.454	0.0614
0.78318	0.08345	0.81669	0.10104	0.45597	0.06154
0.79566	0.08367	0.83082	0.10117	0.46152	0.06182
0.79752	0.08384	0.82254	0.10139	0.46613	0.06195
0.79458	0.08397	0.82943	0.10153	0.46595	0.06204
0.79513	0.08424	0.82132	0.10166	0.4738	0.06227
0.80148	0.08432	0.83564	0.10189	0.4748	0.06241
0.79315	0.08463	0.82873	0.10202	0.47854	0.06264
0.8029	0.08476	0.83959	0.10229	0.47797	0.06277
0.81238	0.08489	0.83977	0.10243	0.48223	0.06287
0.8058	0.08511	0.8225	0.10247	0.48004	0.06314
0.81556	0.08525	0.83873	0.10278	0.48196	0.06323
0.81444	0.08538	0.82383	0.10287	0.48492	0.06346
0.81492	0.08564	0.84284	0.1031	0.49028	0.0636
0.82083	0.08577	0.82921	0.10323	0.49013	0.06373
0.80827	0.08604	0.84736	0.10346	0.49527	0.06392
0.82409	0.08612	0.83185	0.10359	0.49809	0.06405
0.81058	0.08639	0.83308	0.10373	0.50185	0.06424
0.81135	0.08652	0.82989	0.10395	0.50475	0.06437
0.82855	0.08665	0.83256	0.10408	0.50893	0.06451
0.81398	0.08691	0.8506	0.10435	0.51068	0.06474
0.82735	0.08704	0.83583	0.10444	0.51366	0.06483
0.81615	0.08726	0.85896	0.10458	0.51927	0.06506
0.82995	0.08739	0.84034	0.10485	0.52169	0.06519
0.83196	0.08753	0.8407	0.10498	0.52196	0.06529
0.82172	0.08779	0.84706	0.10525	0.52411	0.06551
0.84103	0.08792	0.84898	0.10539	0.52752	0.06565
0.83183	0.08818	0.84726	0.10561	0.52688	0.06583
0.82283	0.08832	0.84236	0.10574	0.53135	0.06593
0.83938	0.0884	0.85789	0.10588	0.53177	0.06606
0.82293	0.08867	0.84818	0.1061	0.53177	0.06624
0.83016	0.0888	0.86422	0.10624	0.53304	0.06638
0.83899	0.08906	0.86008	0.10651	0.53471	0.06661
0.83281	0.08919	0.85871	0.1066	0.53763	0.06675
0.84569	0.08932	0.86871	0.10673	0.5406	0.06693
0.83573	0.08954	0.85062	0.107	0.54344	0.06702
0.83903	0.08968	0.87478	0.10709	0.54195	0.06716
0.85534	0.08998	0.85823	0.1074	0.54558	0.06734
0.84364	0.09011	0.85559	0.10754	0.55121	0.06748
0.84884	0.0902	0.87559	0.10763	0.55478	0.06757
0.85324	0.09046	0.86195	0.1079	0.55913	0.0678
0.8409	0.0906	0.8671	0.10803	0.55748	0.06789
0.86178	0.09082	0.86338	0.10826	0.5513	0.06812
0.85471	0.09099	0.86578	0.10839	0.54902	0.06821
0.86787	0.09121	0.88436	0.10857	0.54683	0.06839
0.85774	0.09134	0.87121	0.10879	0.5509	0.06853
0.85564	0.09147	0.88329	0.10893	0.55014	0.06867
0.87113	0.09174	0.88376	0.1092	0.5531	0.06885
0.85911	0.09182	0.88502	0.10929	0.55068	0.06898
0.87236	0.09213	0.89408	0.10956	0.54866	0.06917
0.88418	0.09226	0.87997	0.10969	0.5513	0.0693
0.87782	0.09239	0.87801	0.10982	0.554	0.0694
0.88812	0.09261	0.88368	0.11009	0.55545	0.06967
0.88574	0.09275	0.88461	0.11023	0.55706	0.06976
0.8759	0.09288	0.89408	0.11045	0.56754	0.06999
0.89146	0.0931	0.88637	0.11059	0.56959	0.07013
0.87983	0.09323	0.88981	0.11072	0.57176	0.07022
0.89427	0.09349	0.88587	0.11095	0.57415	0.07045
0.87778	0.09358	0.89417	0.11108	0.57725	0.07058
0.88476	0.09371	0.91173	0.11139	0.57997	0.07077
0.89491	0.09397	0.90439	0.11153	0.57971	0.0709
0.88467	0.09411	0.90789	0.11162	0.57882	0.07099
0.90622	0.09432	0.9048	0.11189	0.57841	0.07118
0.88991	0.09446	0.90073	0.11202	0.57739	0.07131
0.91082	0.09467	0.92225	0.11225	0.57795	0.07154
0.89432	0.09481	0.90577	0.11238	0.58083	0.07168
0.89482	0.09494	0.92618	0.11261	0.57671	0.07172
0.90927	0.0952	0.91432	0.11274	0.5759	0.072
0.90229	0.09529	0.91934	0.11287	0.57447	0.07209
0.91364	0.09555	0.93911	0.11314	0.57429	0.07232
0.8979	0.09568	0.92166	0.11323	0.57632	0.07241
0.91711	0.09577	0.93893	0.11337	0.57795	0.07255
0.90479	0.09603	0.92841	0.11364	0.5814	0.07277
0.90623	0.09617	0.94549	0.11373	0.58154	0.07287
0.91046	0.09639	0.93257	0.114	0.57822	0.07314
0.91336	0.09652	0.93656	0.11413	0.58064	0.07323
0.90876	0.09674	0.93283	0.11435	0.58006	0.07337
0.91086	0.09687	0.94437	0.11449	0.58106	0.0736
0.92875	0.097	0.9578	0.11462	0.58138	0.07373
0.91681	0.09722	0.9511	0.11485	0.58615	0.07396
0.93321	0.09735	0.96101	0.11498	0.58925	0.0741
0.93285	0.09753	0.94945	0.11521	0.5912	0.07424
0.92085	0.09775	0.96938	0.1153	0.59633	0.07446
0.93598	0.09788	0.95828	0.11543	0.6022	0.07456
0.92073	0.0981	0.97689	0.1157	0.60781	0.07483
0.93751	0.09827	0.96164	0.11579	0.61483	0.07497
0.92674	0.09849	0.98204	0.11601	0.61799	0.07506
0.94024	0.09862	0.97136	0.11615	0.62456	0.07529
0.9398	0.09875	0.97883	0.11628	0.62273	0.07542
0.94068	0.09897	0.97417	0.11646	0.6231	0.07561
0.94924	0.0991	0.98938	0.1166	0.62085	0.07574
0.93782	0.09924	0.9874	0.11682	0.62527	0.07583
0.95289	0.09946	0.99657	0.11691	0.62417	0.07611
0.94798	0.09959	0.9825	0.11704	0.62752	0.07615
0.95152	0.09985	0.99874	0.11731	0.62908	0.07643
0.94807	0.09994	0.98571	0.11736	0.62873	0.07652
0.95811	0.1002	0.99716	0.11763	0.62711	0.07666
0.96484	0.10033	0.99246	0.11772	0.62627	0.07684
0.95745	0.10046	0.99427	0.11794	0.6295	0.07698
0.96911	0.10068	1.00136	0.11808	0.63562	0.07716
0.95261	0.10077	1.00634	0.11817	0.64138	0.0773
0.97356	0.10099	1.00051	0.11839	0.64197	0.07743
0.95583	0.10112	0.99039	0.11852	0.64237	0.07766
0.95982	0.10125	0.98941	0.11861	0.63683	0.07775
0.95883	0.10147	0.98531	0.11884	0.6372	0.07798
0.95973	0.1016	0.99039	0.11897	0.6358	0.07812
0.9744	0.10187	0.9908	0.11924	0.63829	0.07816
0.9683	0.10196	0.99645	0.11933	0.64129	0.07844
0.97735	0.10222	0.9893	0.11956	0.64634	0.07853
0.97006	0.10235	1.00056	0.11969	0.64987	0.07876
0.98302	0.10248	1.0135	0.11978	0.65042	0.07889
0.97302	0.10266	1.01413	0.12005	0.65059	0.07898
0.99026	0.10279	1.01833	0.12018	0.65225	0.07921
0.9814	0.10301	1.01941	0.12036	0.65441	0.0793
0.99437	0.10314	1.01259	0.1205	0.65457	0.07958
0.9866	0.10327	0.99801	0.12063	0.65576	0.07967
0.99723	0.10354	1.01116	0.12086	0.65294	0.07976
0.98299	0.10358	1.00392	0.12095	0.6579	0.07999
1.00322	0.10384	1.02597	0.12122	0.65544	0.08013
0.99777	0.10397	1.00836	0.12135	0.65566	0.08035
1.00488	0.10419	1.02792	0.12144	0.65307	0.08045
0.99416	0.10432	1.00285	0.12171	0.65468	0.08058
0.98999	0.10446	1.0175	0.12184	0.65096	0.08081
1.00739	0.10472	1.01541	0.12202	0.65213	0.08095
0.98991	0.10476	1.03605	0.12216	0.63736	0.08118
1.00546	0.10503	1.02338	0.12238	0.64018	0.08127
0.98882	0.10516	1.04275	0.12252	0.64	0.0814
1.00627	0.10538	1.03748	0.12265	0.64603	0.08168
0.99255	0.10551	1.04352	0.12292	0.64675	0.08182
0.99222	0.10564	1.03176	0.12296	0.64962	0.08204
0.99086	0.10586	1.05489	0.12323	0.6531	0.08218
0.99389	0.10599	1.0401	0.12337	0.62878	0.08241
1.01042	0.10612	1.0489	0.12346	0.62927	0.08259
0.9938	0.10639	1.04376	0.12368	0.63169	0.08273
1.00876	0.10652	1.0534	0.12382	0.63092	0.083
1.00429	0.10678	1.04775	0.124	0.6341	0.08314
1.00735	0.10687	1.06518	0.12413	0.63652	0.08328
1.00569	0.10713	1.0582	0.12426	0.64201	0.0836
1.00064	0.10726	1.06917	0.12444	0.64752	0.08369
1.02059	0.10735	1.05915	0.12458	0.65024	0.08401
1.00981	0.10761	1.07395	0.1248	0.65088	0.08414
1.01038	0.10775	1.06004	0.12489	0.64711	0.08442
1.01155	0.10796	1.05545	0.12512	0.64725	0.08456
1.011	0.1081	1.06448	0.12525	0.64417	0.08474
1.02689	0.10827	1.06735	0.12534	0.64792	0.08497
1.02248	0.10853	1.0851	0.12557	0.65092	0.08515
1.02917	0.10862	1.08418	0.1257	0.64819	0.08547
1.0246	0.10889	1.08978	0.12588	0.6488	0.08561
1.02102	0.10902	1.07498	0.12601	0.65225	0.0857
1.0348	0.10915	1.09511	0.1261	0.65575	0.08602
1.02553	0.10937	1.08445	0.12633	0.65468	0.0862
1.03565	0.1095	1.09662	0.12646	0.66168	0.08643
1.04663	0.10963	1.09304	0.12669	0.66308	0.08661
1.03943	0.10985	1.08186	0.12673	0.66447	0.08675
1.05302	0.10998	1.1015	0.127	0.66451	0.08702
1.03628	0.11025	1.08883	0.12709	0.66814	0.0872
1.0519	0.11033	1.09145	0.12727	0.67404	0.08748
1.03732	0.1106	1.09482	0.1274	0.67452	0.08761
1.0451	0.11073	1.10836	0.12749	0.68057	0.08775
1.05904	0.11086	1.1107	0.12772	0.68446	0.08807
1.05037	0.11108	1.09414	0.12781	0.68303	0.08821
1.06254	0.11121	1.11871	0.12803	0.68361	0.08848
1.05376	0.11143	1.11282	0.12812	0.68856	0.08862
1.06727	0.11156	1.10251	0.12835	0.68839	0.08876
1.06332	0.11169	1.11353	0.12843	0.69162	0.08903
1.07079	0.11191	1.11771	0.12861	0.69308	0.08917
1.06818	0.11204	1.11209	0.12875	0.69654	0.08949
1.06333	0.11231	1.12059	0.12897	0.69662	0.08958
1.0631	0.11239	1.10111	0.12906	0.69833	0.08972
1.05894	0.11248	1.12008	0.12929	0.70078	0.09003
1.07194	0.11279	1.10904	0.12938	0.7029	0.09013
1.06456	0.11292	1.12387	0.12947	0.6982	0.09045
1.07862	0.11314	1.12208	0.12974	0.69922	0.09058
1.08266	0.11327	1.12716	0.12983	0.70344	0.09081
1.08704	0.11349	1.12811	0.13005	0.70789	0.09099
1.08321	0.11362	1.11274	0.13014	0.71059	0.09113
1.07086	0.11375	1.12918	0.13036	0.71716	0.09136
1.08526	0.11397	1.1253	0.13045	0.71555	0.0915
1.0712	0.1141	1.14171	0.13059	0.71073	0.09168
1.09165	0.11437	1.14487	0.13077	0.70813	0.092
1.07586	0.11446	1.13296	0.1309	0.71219	0.09209
1.07931	0.11459	1.14875	0.13113	0.72032	0.09241
1.09267	0.11485	1.13613	0.13122	0.72118	0.09255
1.08399	0.11498	1.14769	0.13144	0.71966	0.09282
1.09481	0.1152	1.14555	0.13153	0.71962	0.09296
1.08437	0.11533	1.14518	0.13171	0.71864	0.09314
1.10546	0.11555	1.1571	0.1318	0.71862	0.09337
1.08766	0.11568	1.1429	0.13193	0.71761	0.09351
1.08997	0.11582	1.16794	0.13216	0.71805	0.09369
1.10624	0.11608	1.16817	0.13225	0.72047	0.09392
1.09357	0.11617	1.15524	0.13243	0.72131	0.0941
1.10661	0.1163	1.16954	0.13256	0.7248	0.09442
1.09118	0.11656	1.17191	0.13274	0.72606	0.09456
1.11007	0.11665	1.15631	0.13283	0.73082	0.09483
1.09775	0.11691	1.17791	0.13305	0.73009	0.09497
1.10077	0.11704	1.17289	0.13314	0.73138	0.09515
1.0998	0.11726	1.15995	0.13332	0.73787	0.09538
1.10387	0.11739	1.17884	0.13346	0.73795	0.09556
1.12039	0.11753	1.18307	0.13364	0.7372	0.0957
1.1124	0.11775	1.16722	0.13373	0.73894	0.09597
1.13008	0.11788	1.18924	0.13382	0.74163	0.09611
1.11205	0.11814	1.18679	0.134	0.7422	0.09643
1.13149	0.11823	1.18726	0.13413	0.7432	0.09652
1.12726	0.11836	1.18554	0.13435	0.74716	0.09684
1.12938	0.11862	1.16866	0.13444	0.74707	0.09698
1.12668	0.11871	1.1798	0.13467	0.74869	0.09716
1.13243	0.11897	1.17166	0.13476	0.7551	0.09739
1.13828	0.11911	1.17475	0.13494	0.74926	0.09757
1.1402	0.11932	1.19153	0.13507	0.75401	0.0978
1.14309	0.11941	1.1749	0.13516	0.75476	0.09798
1.12548	0.11954	1.19367	0.13539	0.75303	0.09812
1.14687	0.11976	1.17634	0.13547	0.75468	0.09844
1.13164	0.11989	1.18991	0.13561	0.75622	0.09853
1.13504	0.12003	1.17761	0.13583	0.76046	0.09885
1.13146	0.12025	1.17943	0.13592	0.75964	0.09898
1.14397	0.12038	1.20266	0.13615	0.75855	0.09912
1.14487	0.12064	1.18559	0.13624	0.76566	0.0994
1.143	0.12077	1.18967	0.13642	0.76989	0.09958
1.1476	0.12099	1.19279	0.13655	0.77252	0.09985
1.14662	0.12108	1.18986	0.13678	0.77428	0.09999
1.16244	0.12121	1.21033	0.13682	0.77285	0.10013
1.14972	0.12143	1.20916	0.13709	0.76578	0.1004
1.1676	0.12156	1.21005	0.13718	0.76846	0.10054
1.15927	0.12178	1.20925	0.13736	0.77549	0.10086
1.16858	0.12191	1.18975	0.13749	0.77897	0.10104
1.15549	0.12204	1.20181	0.13763	0.78028	0.10113
1.17519	0.12226	1.19679	0.13781	0.78312	0.10145
1.16168	0.12235	1.21025	0.13794	0.78645	0.10159
1.18548	0.12261	1.18808	0.13803	0.79222	0.10186
1.16729	0.12275	1.20103	0.13826	0.79455	0.102
1.18092	0.12292	1.19127	0.13839	0.79727	0.10218
1.17315	0.12305	1.21146	0.13861	0.7995	0.10241
1.18598	0.12318	1.19903	0.1387	0.79929	0.10259
1.17912	0.12336	1.19693	0.13897	0.80241	0.10287
1.19314	0.12349	1.19925	0.13906	0.79883	0.10296
1.18374	0.12375	1.21455	0.13915	0.80125	0.10314
1.19891	0.1238	1.20843	0.13942	0.80451	0.10341
1.19805	0.12406	1.22061	0.13956	0.8031	0.1036
1.19976	0.12415	1.22186	0.13973	0.80752	0.10383
1.20418	0.12437	1.21595	0.13987	0.8105	0.10396
1.18567	0.12446	1.20089	0.14	0.81037	0.10424
1.20637	0.12472	1.20966	0.14023	0.81113	0.10437
1.18679	0.12481	1.21113	0.14032	0.81103	0.10456
1.20642	0.12494	1.22831	0.14059	0.81301	0.10483
1.19628	0.12516	1.2128	0.14072	0.81247	0.10497
1.21391	0.12525	1.22922	0.14081	0.81833	0.10524
1.20103	0.12546	1.21757	0.14104	0.82242	0.10542
1.21519	0.1256	1.23754	0.14117	0.82214	0.10551
1.21785	0.12577	1.23986	0.14139	0.83104	0.10583
1.21599	0.1259	1.24743	0.14148	0.83456	0.10597
1.20366	0.12603	1.23233	0.14162	0.83627	0.1062
1.20651	0.12625	1.25238	0.14184	0.83999	0.10634
1.20842	0.12634	1.23834	0.14193	0.84208	0.10647
1.21597	0.12661	1.24392	0.1422	0.84665	0.10675
1.20706	0.12669	1.24159	0.14229	0.85032	0.10693
1.20687	0.12691	1.25836	0.14243	0.85264	0.1072
1.22694	0.127	1.25666	0.14261	0.85345	0.10734
1.21626	0.12722	1.25461	0.14274	0.85805	0.10743
1.23218	0.12735	1.24101	0.14283	0.85735	0.10771
1.21647	0.12761	1.24052	0.14305	0.85524	0.10784
1.23584	0.12766	1.25031	0.14319	0.85708	0.10807
1.22857	0.12792	1.24906	0.14341	0.85654	0.10821
1.24038	0.12805	1.25941	0.14355	0.85901	0.10835
1.2238	0.12814	1.25935	0.14373	0.85662	0.10857
1.23463	0.12836	1.2662	0.14386	0.85684	0.10876
1.22604	0.12845	1.27101	0.14404	0.8501	0.10903
1.23288	0.12867	1.2648	0.14417	0.85251	0.10912
1.24469	0.1288	1.25866	0.14426	0.85619	0.10926
1.23885	0.12902	1.2733	0.14453	0.85741	0.10958
1.25196	0.12915	1.27906	0.14462	0.8611	0.10971
1.23831	0.12919	1.26759	0.14485	0.86749	0.10999
1.25808	0.12946	1.28254	0.14498	0.86561	0.11013
1.24779	0.12954	1.26596	0.14503	0.87025	0.11035
1.25648	0.12976	1.28627	0.1453	0.87527	0.11049
1.24933	0.12985	1.27001	0.14539	0.87177	0.11067
1.25092	0.13007	1.28225	0.14561	0.87553	0.11095
1.262	0.1302	1.2781	0.1457	0.87868	0.11104
1.25942	0.13038	1.29164	0.14583	0.87997	0.11118
1.27034	0.13046	1.27443	0.14606	0.87946	0.1115
1.26947	0.13073	1.28997	0.14615	0.87934	0.11159
1.27562	0.13082	1.28808	0.14642	0.88408	0.11186
1.26442	0.1309	1.29027	0.14651	0.88311	0.112
1.26501	0.13112	1.27724	0.1466	0.86391	0.11227
1.2745	0.13125	1.27966	0.14687	0.87287	0.11241
1.26844	0.13143	1.28131	0.14695	0.88025	0.11259
1.28428	0.13156	1.28294	0.14718	0.8879	0.11282
1.26798	0.13178	1.2948	0.14731	0.89014	0.11296
1.27829	0.13187	1.30434	0.1474	0.89482	0.11314
1.27155	0.13196	1.30613	0.14763	0.90274	0.11341
1.28279	0.13222	1.29837	0.14776	0.90475	0.1135
1.29258	0.13226	1.31606	0.14799	0.91191	0.11383
1.27363	0.13253	1.31448	0.14812	0.91303	0.11396
1.29466	0.13261	1.31803	0.14821	0.91745	0.11419
1.28429	0.13283	1.30568	0.14843	0.91706	0.11433
1.29771	0.13296	1.32797	0.14852	0.91631	0.11446
1.27884	0.13305	1.32242	0.14875	0.92135	0.11469
1.2898	0.13327	1.33771	0.14884	0.92358	0.11483
1.28472	0.13336	1.34084	0.14906	0.92997	0.1151
1.30117	0.13362	1.3271	0.14915	0.93055	0.11519
1.29604	0.13371	1.33473	0.14929	0.93535	0.11533
1.30634	0.1338	1.33675	0.14947	0.93857	0.11561
1.29686	0.13406	1.34819	0.14956	0.93838	0.11574
1.29711	0.13415	1.33243	0.14969	0.94223	0.11597
1.31384	0.13437	1.33071	0.14987	0.94166	0.11611
1.31142	0.1345	1.34887	0.14996	0.94501	0.1162
1.32425	0.13468	1.33852	0.15018	0.95302	0.11643
1.30473	0.13481	1.35873	0.15032	0.9568	0.11656
1.3266	0.13489	1.36592	0.1505	0.95656	0.11684
1.31578	0.13511	1.36515	0.15063	0.95958	0.11693
1.32874	0.1352	1.35503	0.15072	0.9569	0.11707
1.32604	0.13546	1.35531	0.1509	0.9535	0.11729
1.33896	0.13555	1.37376	0.15099	0.94884	0.11739
1.324	0.13564	1.38261	0.15121	0.95515	0.11766
1.32619	0.13586	1.36242	0.1513	0.95573	0.1178
1.32871	0.13599	1.38376	0.15139	0.9493	0.11793
1.32666	0.13617	1.37437	0.15162	0.95149	0.11816
1.34334	0.1363	1.3734	0.15166	0.95455	0.1183
1.32981	0.13639	1.3953	0.15189	0.9582	0.11853
1.3346	0.13656	1.38232	0.15198	0.96059	0.11862
1.33444	0.13669	1.39861	0.15207	0.96321	0.11876
1.33229	0.13687	1.39953	0.15225	0.96567	0.11903
1.35133	0.137	1.38494	0.15238	0.96884	0.11912
1.33428	0.13709	1.38334	0.15252	0.96693	0.1194
1.35224	0.13731	1.40504	0.15265	0.96697	0.11953
1.33646	0.13739	1.38869	0.15274	0.96567	0.11962
1.33767	0.13761	1.39842	0.15292	0.9675	0.1199
1.34329	0.13775	1.40873	0.15301	0.96958	0.12003
1.34623	0.13792	1.40855	0.15323	0.96711	0.12026
1.36349	0.13805	1.4147	0.15332	0.96967	0.1204
1.3464	0.13814	1.41061	0.15346	0.96845	0.12054
1.36001	0.13836	1.40665	0.15359	0.97197	0.12077
1.35436	0.13845	1.42423	0.15368	0.97373	0.1209
1.37272	0.13858	1.42516	0.15386	0.97675	0.12118
1.37334	0.13875	1.4185	0.15395	0.97851	0.12131
1.3589	0.13889	1.4354	0.15404	0.9747	0.12154
1.37717	0.1391	1.42027	0.15417	0.97743	0.12168
1.35878	0.13915	1.41926	0.15431	0.98118	0.12186
1.37035	0.13941	1.42037	0.15449	0.98446	0.12209
1.3683	0.1395	1.42778	0.15453	0.98841	0.12223
1.38381	0.13963	1.44282	0.15476	0.9892	0.12236
1.38567	0.13981	1.42492	0.15485	0.99228	0.12259
1.36967	0.13989	1.43118	0.15489	0.98866	0.12273
1.37822	0.14011	1.4454	0.15512	0.99148	0.123
1.37815	0.1402	1.43069	0.15521	0.9919	0.12309
1.39407	0.14033	1.43879	0.15539	0.98948	0.12337
1.39879	0.14051	1.45229	0.15548	0.9921	0.1235
1.38236	0.1406	1.43468	0.15557	0.99382	0.12364
1.40247	0.14082	1.44639	0.1557	0.99721	0.12387
1.3862	0.14095	1.44745	0.15583	1.00006	0.12401
1.40492	0.14099	1.45755	0.15601	1.00168	0.12428
1.40943	0.14121	1.45862	0.15606	1.00113	0.12442
1.40661	0.14134	1.45549	0.15619	1.00145	0.12456
1.41242	0.14152	1.4634	0.15637	1.00763	0.12483
1.40156	0.1416	1.46508	0.15642	1.01089	0.12492
1.40216	0.14178	1.46345	0.1566	1.01622	0.12519
1.42162	0.14191	1.46348	0.15673	1.01828	0.12533
1.40552	0.142	1.45268	0.15687	1.01529	0.12542
1.40639	0.14218	1.47297	0.15695	1.0198	0.1257
1.42096	0.14231	1.46432	0.15704	1.02369	0.12583
1.41885	0.14248	1.46015	0.15722	1.02704	0.12606
1.43821	0.14261	1.48315	0.15731	1.02818	0.1262
1.41798	0.14266	1.48999	0.15749	1.02683	0.12634
1.41939	0.14288	1.47913	0.15758	1.0302	0.12656
1.43647	0.14296	1.49335	0.15767	1.02991	0.1267
1.43485	0.14314	1.49911	0.15785	1.03722	0.12698
1.43321	0.14327	1.48038	0.15794	1.03749	0.12711
1.43509	0.14345	1.48236	0.15808	1.03856	0.1272
1.43076	0.14354	1.50213	0.15817	1.03983	0.12748
1.44975	0.14362	1.48925	0.15826	1.0414	0.12761
1.45163	0.14384	1.50284	0.15839	1.04608	0.12784
1.43432	0.14389	1.50185	0.15848	1.0468	0.12793
1.45128	0.14402	1.50697	0.15866	1.05073	0.12807
1.44487	0.14424	1.51687	0.15875	1.05338	0.1283
1.43472	0.14428	1.50168	0.15884	1.05717	0.12844
1.45837	0.1445	1.5068	0.15902	1.05532	0.12871
1.44476	0.14459	1.5271	0.15911	1.05422	0.1288
1.44727	0.14476	1.52397	0.15924	1.05448	0.12894
1.46625	0.14485	1.51605	0.15933	1.05538	0.12921
1.45142	0.14498	1.52619	0.15942	1.05532	0.12935
1.45148	0.14511	1.51646	0.15956	1.06011	0.12953
1.46573	0.14525	1.53479	0.15965	1.06163	0.12967
1.44844	0.14533	1.54106	0.15978	1.0746	0.1299
1.46714	0.14555	1.52304	0.15987	1.07836	0.13004
1.47258	0.1456	1.52897	0.15991	1.07882	0.13017
1.45795	0.14582	1.52712	0.16009	1.08248	0.13045
1.47456	0.1459	1.53553	0.16018	1.08315	0.13049
1.47803	0.14608	1.54591	0.16032	1.08878	0.13063
1.46158	0.14617	1.52936	0.16041	1.09725	0.1309
1.47854	0.1463	1.54741	0.1605	1.10083	0.13099
1.48419	0.14647	1.53422	0.16063	1.10539	0.13122
1.4655	0.14656	1.54126	0.16072	1.1101	0.13136
1.48065	0.14678	1.55014	0.1609	1.11633	0.13154
1.48578	0.14682	1.53478	0.16095	1.11749	0.13163
1.47302	0.14691	1.55196	0.16104	1.1154	0.13177
1.49115	0.14713	1.56019	0.16121	1.11355	0.13195
1.47725	0.14722	1.55301	0.16126	1.11415	0.13209
1.47794	0.14739	1.55847	0.16144	1.11473	0.13232
1.49821	0.14753	1.54299	0.16153	1.11836	0.13241
1.47623	0.14761	1.54813	0.16166	1.11664	0.1325
1.47869	0.14779	1.56483	0.16175	1.11906	0.13273
1.49986	0.14788	1.54943	0.16184	1.12022	0.13287
1.49888	0.14805	1.55787	0.16202	1.12399	0.13305
1.4854	0.14814	1.5552	0.16207	1.12888	0.13319
1.49374	0.14827	1.57164	0.16216	1.13186	0.13328
1.49849	0.14845	1.57209	0.16234	1.13474	0.13351
1.50393	0.14854	1.55912	0.16238	1.13651	0.1336
1.50993	0.14871	1.56699	0.16252	1.13804	0.13382
1.48927	0.14884	1.56518	0.16261	1.14177	0.13392
1.49394	0.14902	1.56298	0.16274	1.1406	0.13401
1.51219	0.14911	1.57876	0.16283	1.1399	0.13424
1.49645	0.14919	1.56052	0.16292	1.13624	0.13437
1.49565	0.14937	1.57024	0.1631	1.13713	0.13456
1.51294	0.14946	1.57092	0.16314	1.14062	0.13469
1.51425	0.14959	1.57377	0.16323	1.14313	0.13478
1.5188	0.14976	1.58315	0.16341	1.14507	0.13501
1.50272	0.14985	1.56497	0.16346	1.14273	0.1351
1.50781	0.15007	1.57122	0.16364	1.13535	0.13533
1.52379	0.15011	1.59276	0.16373	1.13544	0.13542
1.52546	0.15033	1.5858	0.16386	1.13749	0.13556
1.51051	0.15042	1.58862	0.16395	1.14153	0.13579
1.51452	0.15055	1.57994	0.16404	1.14483	0.13588
1.52417	0.15073	1.58503	0.16417	1.14955	0.13611
1.53373	0.15082	1.60062	0.16426	1.15001	0.13625
1.53248	0.15099	1.59469	0.16444	1.15387	0.13643
1.51568	0.15108	1.5922	0.16449	1.15539	0.13656
1.53292	0.15121	1.58789	0.16458	1.15403	0.1367
1.54015	0.15139	1.58424	0.16476	1.15485	0.13688
1.519	0.15147	1.60271	0.16485	1.15715	0.13702
1.53014	0.15169	1.60324	0.16498	1.15603	0.13711
1.52858	0.15178	1.5855	0.16507	1.16157	0.13739
1.52497	0.15182	1.58739	0.16525	1.16335	0.13743
1.54695	0.15204	1.60116	0.16534	1.17228	0.13771
1.527	0.15213	1.60722	0.16539	1.17597	0.1378
1.52912	0.15231	1.61088	0.16557	1.1792	0.13803
1.55069	0.15244	1.58954	0.16565	1.18083	0.13812
1.53504	0.15253	1.59487	0.16579	1.18025	0.13825
1.53391	0.1527	1.61206	0.16588	1.18417	0.13844
1.55475	0.15279	1.59517	0.16597	1.18178	0.13853
1.54099	0.15301	1.60589	0.1661	1.18401	0.13866
1.5478	0.1531	1.60405	0.16619	1.18941	0.13885
1.55526	0.15327	1.61022	0.16637	1.18745	0.13898
1.54229	0.1534	1.61431	0.16646	1.18911	0.13921
1.56397	0.15345	1.60276	0.16655	1.18411	0.1393
1.56559	0.15367	1.59967	0.16673	1.18524	0.13953
1.55082	0.15375	1.62094	0.16682	1.18572	0.13962
1.55277	0.15393	1.62654	0.16696	1.19132	0.13976
1.56002	0.15406	1.60996	0.16704	1.19715	0.13994
1.57319	0.15415	1.63292	0.16713	1.19987	0.14008
1.57332	0.15437	1.62484	0.16727	1.20112	0.14017
1.55921	0.15441	1.63017	0.16736	1.20496	0.1404
1.57593	0.15454	1.63211	0.16754	1.20711	0.14049
1.57789	0.15472	1.62573	0.16763	1.20874	0.14072
1.5675	0.15485	1.63775	0.16767	1.2106	0.14081
1.56188	0.15498	1.64107	0.16785	1.21166	0.14104
1.56867	0.15511	1.62614	0.16794	1.21027	0.14113
1.58374	0.1552	1.62852	0.16812	1.21208	0.14127
1.58301	0.15538	1.64098	0.16821	1.21157	0.14145
1.57102	0.15546	1.62769	0.16834	1.2171	0.14159
1.57721	0.15568	1.64511	0.16843	1.22279	0.14177
1.59419	0.15577	1.62945	0.16852	1.22122	0.14186
1.57642	0.15586	1.63245	0.1687	1.2254	0.142
1.5873	0.15608	1.64879	0.16875	1.22864	0.14223
1.60065	0.15612	1.63213	0.16884	1.2307	0.14227
1.58592	0.15634	1.63894	0.16902	1.23222	0.1425
1.59738	0.15643	1.65243	0.16911	1.23465	0.14264
1.60455	0.15661	1.65209	0.16929	1.23599	0.14273
1.5889	0.15669	1.64363	0.16938	1.23808	0.14291
1.60119	0.15682	1.66436	0.16951	1.24269	0.14305
1.60706	0.15696	1.6453	0.1696	1.24799	0.14323
1.59126	0.15709	1.66843	0.16969	1.24839	0.14332
1.59517	0.15726	1.6679	0.16987	1.25103	0.14346
1.61248	0.15735	1.65052	0.16991	1.25326	0.14364
1.59794	0.15744	1.66506	0.17	1.25589	0.14373
1.61421	0.15766	1.66684	0.17018	1.25985	0.14396
1.60032	0.15775	1.65176	0.17027	1.25845	0.14405
1.6047	0.15792	1.66348	0.17045	1.26187	0.14414
1.62237	0.15801	1.67227	0.17054	1.26618	0.14433
1.62754	0.15818	1.66197	0.17063	1.26761	0.14446
1.61179	0.15827	1.67546	0.17077	1.27051	0.14465
1.63085	0.1584	1.65936	0.17086	1.27162	0.14474
1.63287	0.15858	1.6661	0.17104	1.27503	0.14483
1.61886	0.15867	1.68696	0.17113	1.27743	0.14501
1.64067	0.15875	1.6687	0.17117	1.27577	0.1451
1.63559	0.15893	1.66386	0.17135	1.27981	0.14533
1.62621	0.15902	1.68684	0.17144	1.28391	0.14542
1.63135	0.15919	1.68	0.17162	1.28228	0.14561
1.63388	0.15932	1.6755	0.17171	1.28042	0.1457
1.64545	0.15946	1.68265	0.1718	1.28042	0.14583
1.64249	0.15959	1.67503	0.17193	1.28009	0.14602
1.63385	0.15968	1.69652	0.17202	1.2809	0.14611
1.64378	0.15985	1.69852	0.1722	1.28038	0.14629
1.64169	0.16003	1.68284	0.17229	1.27808	0.14638
1.64473	0.16038	1.6987	0.17234	1.28143	0.14652
1.64897	0.16073	1.69461	0.17252	1.2826	0.1467
1.65238	0.1609	1.67678	0.1726	1.28088	0.14679
1.65379	0.16108	1.68006	0.17278	1.28735	0.14702
1.67276	0.16117	1.69744	0.17287	1.28981	0.14711
1.67054	0.16134	1.68501	0.17296	1.29093	0.1472
1.65678	0.16143	1.70061	0.1731	1.29387	0.14739
1.67723	0.16152	1.6962	0.17319	1.29282	0.14752
1.68601	0.16174	1.69828	0.17337	1.29815	0.14771
1.66834	0.16178	1.69878	0.1735	1.30103	0.1478
1.67123	0.16196	1.69213	0.17355	1.30208	0.14793
1.69021	0.16209	1.69419	0.17373	1.30464	0.14812
1.67529	0.16213	1.71369	0.17382	1.30512	0.14821
1.67555	0.16231	1.71552	0.17395	1.30753	0.14844
1.68903	0.16239	1.69743	0.17404	1.31131	0.14853
1.69177	0.16257	1.71763	0.17417	1.31149	0.14862
1.67928	0.16266	1.72083	0.17435	1.31465	0.1488
1.69538	0.16275	1.70831	0.1744	1.31597	0.14894
1.69613	0.16292	1.71352	0.17458	1.31462	0.14912
1.68433	0.16301	1.73079	0.17467	1.31469	0.14921
1.68706	0.16318	1.71856	0.17476	1.31259	0.1493
1.69688	0.16327	1.73108	0.17489	1.31313	0.14949
1.69896	0.16345	1.72944	0.17498	1.31687	0.14962
1.70533	0.1638	1.73571	0.17507	1.31973	0.14981
1.70852	0.16415	1.74248	0.17525	1.31902	0.1499
1.71516	0.1645	1.73066	0.1753	1.32167	0.15004
1.71802	0.16468	1.73113	0.17547	1.32372	0.15022
1.70576	0.16481	1.75055	0.17556	1.32625	0.15035
1.72342	0.16485	1.74373	0.17574	1.32921	0.15054
1.72642	0.16503	1.73926	0.17583	1.33056	0.15063
1.71078	0.16511	1.74278	0.17588	1.3319	0.15081
1.71437	0.16529	1.7374	0.17606	1.3359	0.1509
1.73374	0.16538	1.75288	0.17615	1.33718	0.15104
1.72285	0.16546	1.73703	0.17624	1.33778	0.15122
1.72589	0.16564	1.74256	0.17637	1.33734	0.15131
1.73995	0.16573	1.76175	0.17646	1.34122	0.1514
1.7404	0.1659	1.76664	0.17664	1.34603	0.15163
1.73596	0.16595	1.76255	0.17669	1.34651	0.15172
1.73602	0.16608	1.76571	0.17687	1.35289	0.15191
1.74151	0.16625	1.75236	0.17696	1.35071	0.15204
1.73153	0.16634	1.76982	0.177	1.35222	0.15223
1.74443	0.16647	1.76906	0.17718	1.35592	0.15232
1.73939	0.16656	1.75191	0.17727	1.35381	0.15241
1.73879	0.16674	1.76236	0.1774	1.35899	0.15259
1.75874	0.16682	1.75726	0.17749	1.36197	0.15273
1.74091	0.16691	1.76042	0.17758	1.36146	0.15282
1.74548	0.16709	1.76917	0.17776	1.36502	0.153
1.76039	0.16718	1.75234	0.17785	1.36583	0.15309
1.74133	0.16726	1.75146	0.17803	1.36668	0.15332
1.74315	0.16744	1.77409	0.17812	1.3692	0.15341
1.7578	0.16748	1.75504	0.17817	1.36856	0.1536
1.76257	0.1677	1.75661	0.17834	1.36661	0.15369
1.74519	0.16779	1.77485	0.17843	1.36809	0.15378
1.74901	0.16792	1.77462	0.17861	1.36676	0.15396
1.77092	0.16801	1.7609	0.1787	1.36499	0.1541
1.75202	0.16814	1.78358	0.17879	1.36338	0.15428
1.75957	0.16827	1.77829	0.17893	1.36524	0.15437
1.77347	0.16836	1.78268	0.17902	1.36375	0.15451
1.7599	0.16845	1.78515	0.1792	1.36731	0.15469
1.76317	0.16862	1.78159	0.17929	1.36964	0.15483
1.77901	0.16871	1.79088	0.17938	1.3734	0.15501
1.78134	0.16889	1.79591	0.17956	1.37581	0.1551
1.7702	0.16897	1.7793	0.17965	1.37727	0.15524
1.7739	0.16915	1.77874	0.17978	1.38255	0.15542
1.78228	0.16924	1.79482	0.17987	1.38423	0.15551
1.77431	0.16932	1.77981	0.17996	1.38887	0.15574
1.78563	0.16946	1.78813	0.18014	1.39131	0.15583
1.7751	0.16954	1.80338	0.18023	1.38902	0.15593
1.78037	0.16968	1.81111	0.18041	1.3907	0.15615
1.77833	0.16985	1.81383	0.18045	1.39265	0.1562
1.77626	0.16989	1.79476	0.18054	1.39489	0.15643
1.78438	0.17007	1.79439	0.18072	1.39829	0.15656
1.79337	0.17016	1.81131	0.18077	1.39907	0.15666
1.80096	0.17033	1.81282	0.18095	1.40194	0.15684
1.78498	0.17042	1.79707	0.18104	1.40581	0.15693
1.80277	0.17051	1.8005	0.18122	1.40972	0.15711
1.80454	0.17068	1.81344	0.1813	1.40864	0.15725
1.78865	0.17077	1.80121	0.18139	1.41068	0.15734
1.78784	0.17095	1.82436	0.18153	1.41349	0.15757
1.80906	0.17099	1.80306	0.18162	1.41749	0.15762
1.7925	0.17108	1.80654	0.1818	1.42611	0.15784
1.79924	0.1713	1.82553	0.18189	1.42876	0.15793
1.81791	0.17139	1.80823	0.18198	1.43381	0.15812
1.82111	0.17152	1.81113	0.18216	1.43776	0.15821
1.80431	0.1716	1.82824	0.18225	1.43874	0.1583
1.82101	0.17169	1.82949	0.18238	1.44112	0.15848
1.82258	0.17187	1.81801	0.18247	1.44534	0.15857
1.81109	0.17196	1.8352	0.18256	1.44512	0.15867
1.82654	0.17209	1.83171	0.18274	1.448	0.15885
1.82081	0.17217	1.8214	0.18283	1.4495	0.15894
1.82533	0.17226	1.82562	0.18301	1.45048	0.15912
1.82576	0.17248	1.82439	0.18305	1.44978	0.15921
1.81789	0.17253	1.84738	0.18314	1.45141	0.1594
1.81572	0.1727	1.84287	0.18332	1.45625	0.15949
1.83685	0.17279	1.82501	0.18337	1.45483	0.15958
1.82361	0.17288	1.82634	0.18355	1.45874	0.15976
1.82808	0.17305	1.84724	0.18368	1.46152	0.15985
1.84797	0.17314	1.8315	0.18377	1.46224	0.15994
1.84911	0.17332	1.83704	0.18391	1.46576	0.16008
1.8353	0.17336	1.85531	0.184	1.4708	0.16022
1.85086	0.17345	1.85429	0.18417	1.47818	0.1604
1.85246	0.17362	1.83578	0.18426	1.47855	0.16045
1.84286	0.17367	1.84197	0.18431	1.48417	0.16063
1.84079	0.17389	1.8528	0.18453	1.48701	0.16072
1.84972	0.17397	1.84344	0.18462	1.48806	0.16081
1.84193	0.1741	1.86512	0.18476	1.49282	0.16099
1.85587	0.17419	1.85526	0.18485	1.49646	0.16108
1.83972	0.17428	1.86866	0.18494	1.4951	0.16122
1.84301	0.17441	1.8748	0.18507	1.49446	0.16131
1.86099	0.1745	1.86041	0.18516	1.49354	0.1614
1.84575	0.17459	1.86104	0.18534	1.49775	0.16159
1.8507	0.17481	1.87573	0.18543	1.50168	0.16163
1.86731	0.17485	1.86605	0.18552	1.50659	0.16182
1.87581	0.17503	1.8769	0.1857	1.50605	0.16191
1.86214	0.17511	1.87217	0.18574	1.50669	0.16195
1.87165	0.17525	1.8719	0.18592	1.50759	0.16214
1.86884	0.17533	1.89118	0.18601	1.50873	0.16223
1.87626	0.17542	1.89252	0.18615	1.50675	0.16236
1.88136	0.1756	1.87921	0.18624	1.5069	0.16245
1.85994	0.17568	1.89825	0.18633	1.50836	0.16255
1.88227	0.17577	1.88465	0.18646	1.50986	0.16273
1.88424	0.1759	1.90271	0.18655	1.50899	0.16282
1.87076	0.17599	1.88711	0.18664	1.51036	0.163
1.87216	0.17617	1.88525	0.18682	1.51362	0.16309
1.89294	0.17625	1.90371	0.18687	1.51529	0.16314
1.88288	0.17639	1.90744	0.18704	1.51683	0.16332
1.89184	0.17647	1.89625	0.18713	1.51698	0.16341
1.88506	0.17656	1.91787	0.18727	1.52019	0.16355
1.88271	0.17669	1.89743	0.18736	1.52164	0.16364
1.90152	0.17678	1.91943	0.18745	1.52093	0.16373
1.90665	0.17696	1.91668	0.18758	1.52203	0.16392
1.89324	0.17704	1.90479	0.18767	1.52153	0.16401
1.90345	0.17713	1.9208	0.18781	1.52208	0.16419
1.9057	0.17731	1.90318	0.1879	1.5227	0.16424
1.90953	0.17735	1.92203	0.18799	1.52292	0.16433
1.91437	0.17753	1.92683	0.18812	1.53039	0.16451
1.89871	0.17761	1.90865	0.18821	1.53329	0.1646
1.91705	0.17766	1.91935	0.18839	1.53961	0.16478
1.92155	0.17783	1.9201	0.18843	1.53978	0.16488
1.90764	0.17792	1.93102	0.18852	1.5412	0.16501
1.92562	0.17805	1.92963	0.1887	1.54233	0.1651
1.90539	0.17814	1.91087	0.18875	1.54405	0.16519
1.92975	0.17823	1.91803	0.18893	1.54892	0.16538
1.92611	0.1784	1.92628	0.18902	1.54981	0.16542
1.90992	0.17845	1.92339	0.18911	1.55355	0.16561
1.91484	0.17862	1.9371	0.18924	1.55682	0.1657
1.93045	0.17871	1.92143	0.18933	1.55757	0.16574
1.92033	0.1788	1.92548	0.18947	1.55405	0.16593
1.93669	0.17893	1.9462	0.1896	1.55922	0.16602
1.9225	0.17902	1.92837	0.18965	1.5592	0.1662
1.94152	0.17911	1.93197	0.18983	1.56082	0.16629
1.94047	0.17924	1.93985	0.18991	1.56293	0.16634
1.92575	0.17932	1.92992	0.19005	1.56698	0.16652
1.93199	0.1795	1.95059	0.19014	1.56781	0.16661
1.93055	0.17954	1.93308	0.19023	1.56741	0.16679
1.93707	0.17972	1.93917	0.19036	1.5687	0.16688
1.9547	0.17981	1.9589	0.19045	1.56878	0.16693
1.9395	0.17985	1.95559	0.19063	1.56717	0.16711
1.94695	0.18003	1.96061	0.19068	1.56704	0.1672
1.95176	0.18007	1.94251	0.19077	1.56966	0.16734
1.94818	0.18025	1.94678	0.19095	1.56842	0.16743
1.96444	0.18029	1.96346	0.19104	1.57155	0.16752
1.9527	0.18038	1.96287	0.19117	1.57548	0.16766
1.96451	0.18051	1.94945	0.19126	1.57718	0.16775
1.95981	0.1806	1.97262	0.19139	1.5791	0.16793
1.95621	0.18077	1.95298	0.19148	1.58116	0.16803
1.97448	0.18086	1.97338	0.19157	1.58363	0.16812
1.95452	0.1809	1.9765	0.19171	1.588	0.1683
1.96078	0.18108	1.95702	0.1918	1.59033	0.16839
1.96373	0.18112	1.9635	0.19198	1.59335	0.16853
1.95941	0.18125	1.96214	0.19202	1.59427	0.16862
1.97931	0.18134	1.98278	0.19211	1.59315	0.16871
1.97179	0.18147	1.9873	0.19229	1.59338	0.16885
1.97469	0.18156	1.97431	0.19234	1.5952	0.16894
1.97108	0.18165	1.98011	0.19252	1.59609	0.16912
1.96766	0.18178	1.98399	0.19256	1.59527	0.16921
1.98403	0.18187	1.98145	0.19274	1.59775	0.1693
1.98797	0.18204	1.99825	0.19278	1.60197	0.16949
1.97238	0.18213	1.9873	0.19287	1.60159	0.16953
1.97648	0.18218	1.99961	0.19301	1.60749	0.16972
1.97911	0.18235	1.99623	0.1931	1.60745	0.16981
1.99629	0.18244	2.00864	0.19319	1.61252	0.16994
1.99677	0.18257	2.0091	0.19332	1.61385	0.17003
1.98572	0.18266	1.9946	0.19341	1.61456	0.17013
2.00221	0.18279	2.00225	0.19355	1.6181	0.17026
1.9859	0.18283	2.0014	0.19364	1.62014	0.17035
2.00665	0.18292	1.99424	0.19377	1.62064	0.17045
2.00421	0.1831	2.01622	0.19386	1.62516	0.17063
2.00055	0.18314	1.99571	0.19395	1.62605	0.17067
1.99537	0.18323	2.01541	0.19409	1.62809	0.17086
1.99252	0.1834	1.99819	0.19417	1.63218	0.17095
2.01224	0.18349	2.00048	0.19435	1.63107	0.17113
2.01025	0.18362	2.02001	0.1944	1.63154	0.17118
1.99942	0.18371	2.00641	0.19449	1.63115	0.17127
2.02085	0.18384	2.01377	0.19462	1.63381	0.17145
2.00459	0.18443	2.00996	0.19471	1.63739	0.17154
2.02516	0.18447	2.00175	0.19485	1.64078	0.17168
2.02497	0.18465	2.02152	0.19494	1.64083	0.17177
2.02024	0.18469	2.00468	0.19503	1.64482	0.17186
2.01682	0.18478	2.0138	0.19521	1.64655	0.172
2.01457	0.18496	2.01329	0.19525	1.64938	0.17209
2.02972	0.185	2.00912	0.19543	1.65169	0.17223
2.02712	0.18518	2.02349	0.19552	1.65366	0.17232
2.02697	0.18522	2.00852	0.19556	1.65504	0.17241
2.03959	0.18535	2.00963	0.19574	1.6562	0.17255
2.02329	0.18544	2.02869	0.19583	1.65669	0.17264
2.03946	0.18557	2.03047	0.19601	1.66127	0.17282
2.0238	0.18566	2.03036	0.19606	1.66019	0.17287
2.04056	0.1857	2.02159	0.19615	1.66372	0.17296
2.04487	0.18588	2.02464	0.19628	1.6665	0.17314
2.0468	0.18592	2.04543	0.19637	1.66566	0.17319
2.04997	0.1861	2.03548	0.19651	1.6709	0.17337
2.03284	0.18614	2.04005	0.1966	1.67173	0.17346
2.04878	0.18627	2.0495	0.19678	1.67595	0.17355
2.03671	0.18636	2.03117	0.19682	1.67801	0.17369
2.03967	0.18649	2.04911	0.19691	1.67711	0.17378
2.05139	0.18653	2.0473	0.19713	1.68054	0.17392
2.04557	0.18671	2.05803	0.19731	1.67855	0.17401
2.06311	0.1868	2.04484	0.19736	1.68183	0.17405
2.05591	0.18689	2.04897	0.19754	1.68561	0.17424
2.05883	0.18697	2.05794	0.19758	1.68666	0.17428
2.05092	0.18706	2.05455	0.19776	1.69143	0.17446
2.0519	0.18719	2.07478	0.19785	1.6906	0.17456
2.0601	0.18724	2.0765	0.19799	1.69325	0.1746
2.05288	0.18741	2.06828	0.19803	1.69367	0.17478
2.05719	0.18754	2.07962	0.19821	1.69096	0.17487
2.06129	0.18759	2.0632	0.19826	1.69494	0.17501
2.05698	0.18772	2.07381	0.19843	1.69447	0.17506
2.07388	0.18781	2.07187	0.19848	1.69572	0.17515
2.06162	0.18789	2.0665	0.19861	1.69727	0.17529
2.07854	0.18803	2.08298	0.1987	1.69823	0.17538
2.06443	0.18807	2.07716	0.19879	1.70282	0.17556
2.0708	0.18825	2.09029	0.19893	1.70397	0.17565
2.07836	0.18829	2.07484	0.19897	1.70725	0.17579
2.0751	0.18842	2.0791	0.19915	1.71262	0.17588
2.09113	0.18851	2.08375	0.1992	1.71129	0.17597
2.08652	0.18864	2.07687	0.19933	1.71674	0.17611
2.09956	0.18873	2.09911	0.19942	1.71785	0.17615
2.09425	0.18882	2.08265	0.19956	1.71941	0.17624
2.10063	0.1889	2.09897	0.19965	1.72036	0.17638
2.10544	0.18903	2.10466	0.19978	1.72247	0.17647
2.09751	0.18908	2.08583	0.19987	1.7255	0.17666
2.09529	0.18917	2.10924	0.2	1.7245	0.1767
2.09244	0.1893	2.09243	0.20005	1.72614	0.17684
2.10128	0.18934	2.10392	0.20018	1.72543	0.17693
2.099	0.18952	2.09697	0.20027	1.72753	0.17702
2.11474	0.18956	2.11447	0.20036	1.72899	0.17716
2.1037	0.18969	2.1175	0.2005	1.72817	0.17725
2.12044	0.18978	2.11304	0.20054	1.73338	0.17739
2.11752	0.18991	2.12508	0.20072	1.73197	0.17748
2.12026	0.18996	2.11367	0.20081	1.73455	0.17757
2.12328	0.19009	2.11777	0.2009	1.73332	0.17771
2.10304	0.19018	2.10941	0.20099	1.73222	0.17775
2.12542	0.19031	2.11233	0.20113	1.73048	0.17793
2.10915	0.19035	2.11878	0.20117	1.72785	0.17803
2.12858	0.19044	2.11222	0.20135	1.72862	0.17807
2.1123	0.19057	2.13122	0.20144	1.73052	0.17825
2.13152	0.19061	2.12038	0.20153	1.7326	0.17835
2.13487	0.19079	2.12954	0.20162	1.73623	0.17848
2.12712	0.19088	2.13726	0.20175	1.73732	0.17857
2.13855	0.19096	2.12424	0.20184	1.74296	0.17867
2.1208	0.19105	2.1399	0.20198	1.74442	0.17885
2.12896	0.1916	2.12721	0.20207	1.74462	0.17889
2.12668	0.19173	2.14879	0.20211	1.74645	0.17908
2.14528	0.19182	2.14492	0.20229	1.74939	0.17917
2.1356	0.19195	2.14429	0.20234	1.75014	0.17926
2.13397	0.19208	2.14967	0.20247	1.75331	0.1794
2.1428	0.19212	2.13726	0.20256	1.75144	0.17949
2.15502	0.19221	2.14897	0.20269	1.7555	0.17958
2.14876	0.19234	2.13854	0.20274	1.75341	0.17972
2.15034	0.19239	2.14744	0.20292	1.7535	0.17981
2.15684	0.19252	2.15271	0.20296	1.75503	0.17999
2.15018	0.19256	2.14411	0.2031	1.75682	0.18008
2.16262	0.19274	2.16197	0.20319	1.75744	0.18013
2.14452	0.19278	2.1572	0.20323	1.76163	0.18031
2.16444	0.19291	2.16581	0.20337	1.76296	0.1804
2.15058	0.19296	2.14968	0.20346	1.76618	0.18054
2.1714	0.19309	2.16316	0.20359	1.76861	0.18063
2.15337	0.19313	2.15288	0.20364	1.77101	0.18072
2.15919	0.19331	2.16206	0.20382	1.77446	0.18086
2.1613	0.19335	2.1651	0.20386	1.76978	0.18095
2.15544	0.19348	2.15834	0.204	1.76631	0.18113
2.16281	0.19353	2.1705	0.20409	1.76915	0.18118
2.15916	0.19366	2.15996	0.20422	1.77296	0.18136
2.17385	0.19375	2.17543	0.20426	1.77238	0.18145
2.15983	0.19388	2.17823	0.20444	1.77265	0.18154
2.1819	0.19392	2.17487	0.20449	1.76324	0.18168
2.1697	0.19405	2.18642	0.20462	1.76752	0.18177
2.18157	0.19414	2.17466	0.20471	1.76854	0.18186
2.17035	0.19423	2.18055	0.20476	1.77169	0.182
2.17804	0.19432	2.17585	0.20494	1.77497	0.18209
2.18816	0.19445	2.19549	0.20498	1.78132	0.18227
2.17024	0.19453	2.18167	0.20512	1.78203	0.18236
2.1903	0.19462	2.19683	0.20521	1.7834	0.18255
2.17359	0.19471	2.19215	0.20534	1.78591	0.18264
2.19322	0.1948	2.18898	0.20539	1.78595	0.18273
2.17923	0.19493	2.19614	0.20556	1.78808	0.18287
2.1949	0.19497	2.17897	0.20561	1.78957	0.18296
2.18899	0.1951	2.19023	0.20574	1.79344	0.18309
2.19897	0.19515	2.18108	0.20583	1.7962	0.18319
2.19554	0.19532	2.1828	0.20597	1.79493	0.18328
2.19732	0.19537	2.19192	0.20601	1.79813	0.18346
2.20887	0.1955	2.18524	0.20615	1.79961	0.18355
2.19405	0.19559	2.20687	0.20624	1.80245	0.18373
2.2064	0.19572	2.19715	0.20637	1.80596	0.18382
2.19126	0.19576	2.20292	0.20646	1.80662	0.18387
2.20497	0.19589	2.19183	0.20651	1.81037	0.18405
2.19291	0.19598	2.19501	0.20669	1.81359	0.18414
2.20735	0.19607	2.21599	0.20678	1.81468	0.18428
2.20225	0.19616	2.19819	0.20687	1.81497	0.18437
2.21765	0.19625	2.21773	0.20695	1.81639	0.18446
2.20869	0.19633	2.21209	0.20709	1.81721	0.1846
2.22115	0.19642	2.21797	0.20718	1.81834	0.18469
2.22505	0.19655	2.22549	0.20731	1.81068	0.18487
2.21736	0.1966	2.21182	0.2074	1.81437	0.18497
2.2251	0.19673	2.23073	0.20749	1.81711	0.18506
2.21094	0.19682	2.21768	0.20758	1.81991	0.18524
2.22926	0.19695	2.22968	0.20767	1.82168	0.18533
2.21569	0.19699	2.22222	0.20781	1.82088	0.18547
2.2246	0.19712	2.2347	0.20785	1.82346	0.18556
2.2156	0.19721	2.23169	0.20803	1.82232	0.18565
2.22151	0.19734	2.23304	0.20808	1.82382	0.18579
2.22986	0.19739	2.24578	0.20821	1.82462	0.18588
2.22757	0.19752	2.2333	0.2083	1.8242	0.18606
2.23448	0.19756	2.24828	0.20843	1.8268	0.18615
2.22786	0.19774	2.23428	0.20848	1.82613	0.18625
2.24302	0.19778	2.24815	0.20857	1.82927	0.18643
2.23282	0.19791	2.25419	0.20879	1.83144	0.18652
2.25156	0.19796	2.24873	0.20888	1.83408	0.18666
2.24012	0.19809	2.26385	0.20897	1.83698	0.18675
2.25064	0.19818	2.25814	0.20911	1.83868	0.18693
2.23586	0.19822	2.25259	0.20915	1.84306	0.18702
2.24782	0.19835	2.26017	0.20929	1.84316	0.18711
2.23662	0.19844	2.24469	0.20938	1.84689	0.1873
2.23921	0.19857	2.26229	0.20951	1.84818	0.18734
2.24719	0.19861	2.24478	0.20956	1.84921	0.18743
2.24355	0.19875	2.25259	0.20973	1.84975	0.18762
2.25733	0.19883	2.25282	0.20978	1.85009	0.18771
2.24529	0.19892	2.25526	0.20991	1.85725	0.18789
2.2627	0.19901	2.27596	0.21	1.86131	0.18798
2.25729	0.19914	2.26037	0.21009	1.86399	0.18812
2.26848	0.19923	2.27611	0.21018	1.86465	0.18821
2.2643	0.19932	2.27124	0.21032	1.86543	0.1883
2.26884	0.1994	2.27955	0.21036	1.86792	0.18844
2.25857	0.19949	2.28271	0.21054	1.87061	0.18853
2.27012	0.19958	2.27745	0.21059	1.8749	0.18871
2.26112	0.19967	2.26704	0.21063	1.87238	0.1888
2.26545	0.1998	2.27101	0.21081	1.87669	0.18885
2.27057	0.19984	2.27466	0.21086	1.88117	0.18903
2.26546	0.19997	2.2721	0.21099	1.87962	0.18912
2.28669	0.20006	2.28845	0.21108	1.88625	0.18926
2.27297	0.20015	2.28104	0.21122	1.88702	0.18935
2.28885	0.20024	2.29735	0.21126	1.89028	0.18944
2.2828	0.20037	2.28961	0.21139	1.89414	0.18958
2.29254	0.20041	2.29617	0.21148	1.8934	0.18967
2.28577	0.20054	2.30252	0.21162	1.89736	0.18985
2.2964	0.20063	2.29643	0.21166	1.89702	0.1899
2.28836	0.20072	2.28675	0.21175	1.90177	0.18999
2.2975	0.20081	2.29307	0.21189	1.90442	0.19017
2.3034	0.20094	2.29753	0.21193	1.90534	0.19022
2.29881	0.20098	2.29079	0.21207	1.91069	0.1904
2.31246	0.20111	2.30781	0.2122	1.90958	0.19045
2.30414	0.20116	2.2926	0.21225	1.91004	0.19054
2.31528	0.20129	2.31423	0.21234	1.91182	0.19067
2.30827	0.20133	2.29931	0.21247	1.90987	0.19077
2.30577	0.20142	2.31595	0.21252	1.91215	0.19095
2.30282	0.20155	2.31274	0.21269	1.91403	0.19099
2.30884	0.2016	2.31265	0.21274	1.91696	0.19108
2.30552	0.20173	2.32163	0.21287	1.92125	0.19127
2.31273	0.20182	2.31545	0.21292	1.92056	0.19131
2.30729	0.2019	2.32712	0.2131	1.92036	0.1915
2.3173	0.20195	2.30843	0.21314	1.9221	0.19159
2.31312	0.20208	2.32917	0.21328	1.92115	0.19163
2.32229	0.20212	2.31215	0.21332	1.92183	0.19182
2.31591	0.20225	2.32855	0.21346	1.92422	0.19186
2.33387	0.20234	2.31782	0.21355	1.92912	0.192
2.3205	0.20243	2.33	0.21364	1.93166	0.19209
2.33776	0.20252	2.32032	0.21373	1.93287	0.19218
2.32249	0.20265	2.32213	0.21386	1.94056	0.19236
2.33903	0.20269	2.33648	0.21395	1.94074	0.19241
2.32304	0.20282	2.32599	0.21404	1.94585	0.19259
2.34179	0.20287	2.34391	0.21413	1.9479	0.19268
2.32933	0.203	2.32801	0.21422	1.95087	0.19277
2.35046	0.20304	2.34889	0.21431	1.94986	0.19287
2.33797	0.20317	2.3388	0.21444	1.95098	0.19296
2.34834	0.20322	2.3511	0.21449	1.95606	0.19309
2.33517	0.20335	2.34797	0.21467	1.95815	0.19319
2.34638	0.20344	2.34325	0.21471	1.96132	0.19328
2.33823	0.20353	2.35107	0.21485	1.96373	0.19341
2.34895	0.20361	2.3465	0.21489	1.96073	0.19346
2.33399	0.20366	2.34296	0.21498	1.96303	0.19364
2.35082	0.20379	2.33925	0.21512	1.96273	0.19373
2.33378	0.20383	2.36369	0.21525	1.96684	0.19387
2.34636	0.20401	2.34424	0.21534	1.96713	0.19392
2.34723	0.20405	2.36247	0.21539	1.96694	0.19401
2.34411	0.20418	2.35205	0.21552	1.97257	0.19414
2.3483	0.20423	2.36392	0.21561	1.97196	0.19424
2.34652	0.20436	2.35339	0.2157	1.97489	0.19433
2.36544	0.20445	2.36173	0.21579	1.97763	0.19446
2.353	0.20454	2.36554	0.21592	1.98246	0.19451
2.36909	0.20462	2.34819	0.21601	1.98746	0.19469
2.35284	0.20471	2.37065	0.21615	1.98762	0.19474
2.36917	0.2048	2.35466	0.21619	1.98833	0.19492
2.36377	0.20493	2.36811	0.21633	1.98949	0.19497
2.37719	0.20497	2.35716	0.21642	1.99157	0.19506
2.36486	0.2051	2.3771	0.21646	1.99466	0.19519
2.37592	0.20515	2.37175	0.21664	1.99791	0.19529
2.36439	0.20524	2.38009	0.21669	1.99773	0.19538
[truncated: 8,676 more rows]

## Sheet: pH = 3，Stress-compation
Stress	SP5-10(3)	Stress	SP10-15(3)	Stress	SP15-20(3)
0	1	0	1	0	1
0.10068	0.97888	0.10064	0.97167	0.10033	0.9636
0.10078	0.97883	0.10018	0.97167	0.10028	0.9636
0.10149	0.97883	0.10046	0.97167	0.10054	0.96355
0.10094	0.97883	0.10113	0.97162	0.09963	0.96355
0.10103	0.97883	0.10136	0.97162	0.09977	0.96355
0.10164	0.97883	0.10045	0.97162	0.09926	0.96355
0.1009	0.97879	0.10192	0.97162	0.09871	0.9635
0.10127	0.97879	0.10431	0.97158	0.09903	0.9635
0.1021	0.97879	0.10203	0.97158	0.09976	0.9635
0.0998	0.97879	0.10274	0.97158	0.0987	0.9635
0.10085	0.97879	0.1026	0.97158	0.09982	0.9635
0.10018	0.97875	0.10132	0.97158	0.10023	0.9635
0.10025	0.97875	0.10283	0.97153	0.09894	0.96346
0.1019	0.97875	0.10205	0.97153	0.0988	0.96346
0.10076	0.97875	0.10215	0.97153	0.09889	0.96346
0.10152	0.9787	0.10318	0.97153	0.09917	0.96346
0.1008	0.9787	0.10265	0.97153	0.0999	0.96346
0.10181	0.9787	0.09373	0.97149	0.09866	0.96341
0.10374	0.9787	0.10201	0.97149	0.09972	0.96341
0.10281	0.9787	0.10201	0.97149	0.09926	0.96341
0.11005	0.97866	0.10364	0.97149	0.10134	0.96341
0.10283	0.97866	0.10344	0.97149	0.10117	0.96337
0.10385	0.97866	0.10321	0.97144	0.09996	0.96337
0.10287	0.97866	0.10371	0.97144	0.10101	0.96337
0.10355	0.97866	0.10383	0.97144	0.10168	0.96337
0.10255	0.97861	0.10439	0.97144	0.10233	0.96337
0.10301	0.97861	0.11469	0.9714	0.10127	0.96332
0.10247	0.97861	0.10406	0.9714	0.10201	0.96332
0.10269	0.97861	0.10411	0.9714	0.10166	0.96332
0.10224	0.97861	0.1048	0.9714	0.10237	0.96332
0.09282	0.97857	0.10362	0.9714	0.10178	0.96332
0.10261	0.97857	0.10408	0.97135	0.10279	0.96328
0.10309	0.97857	0.10434	0.97135	0.10269	0.96328
0.10187	0.97857	0.10433	0.97135	0.10325	0.96328
0.10159	0.97857	0.10494	0.97135	0.10242	0.96328
0.10323	0.97853	0.10604	0.97135	0.10417	0.96328
0.10311	0.97853	0.09605	0.97131	0.10324	0.96323
0.10261	0.97853	0.10375	0.97131	0.10413	0.96323
0.10346	0.97853	0.10413	0.97131	0.10494	0.96323
0.10267	0.97853	0.10329	0.97131	0.10468	0.96323
0.1027	0.97848	0.1052	0.97131	0.10503	0.96323
0.10374	0.97848	0.10517	0.97126	0.10608	0.96318
0.10498	0.97848	0.10434	0.97126	0.10567	0.96318
0.10475	0.97848	0.10456	0.97126	0.10558	0.96318
0.10507	0.97844	0.10443	0.97126	0.1038	0.96318
0.10474	0.97844	0.10442	0.97126	0.10613	0.96318
0.10568	0.97844	0.10572	0.97122	0.10539	0.96314
0.10411	0.97844	0.10631	0.97122	0.10581	0.96314
0.1043	0.97844	0.10511	0.97122	0.1053	0.96314
0.09589	0.9784	0.10646	0.97122	0.1048	0.96314
0.10438	0.9784	0.10603	0.97117	0.10408	0.96309
0.10385	0.9784	0.10494	0.97117	0.10434	0.96309
0.10401	0.9784	0.10581	0.97117	0.10535	0.96309
0.10298	0.9784	0.10563	0.97117	0.10567	0.96309
0.10321	0.97835	0.10544	0.97117	0.1052	0.96309
0.10448	0.97835	0.09941	0.97113	0.10631	0.96305
0.1032	0.97835	0.10452	0.97113	0.10452	0.96305
0.10401	0.97835	0.10634	0.97113	0.10549	0.96305
0.1105	0.97831	0.10536	0.97113	0.10461	0.96305
0.10539	0.97831	0.10623	0.97113	0.10466	0.96305
0.10484	0.97831	0.10594	0.97108	0.10613	0.963
0.10503	0.97831	0.10655	0.97108	0.10563	0.963
0.1047	0.97831	0.10548	0.97108	0.10545	0.963
0.10428	0.97826	0.10536	0.97108	0.1054	0.963
0.10437	0.97826	0.10699	0.97108	0.10568	0.96295
0.10415	0.97826	0.11762	0.97104	0.10595	0.96295
0.10337	0.97826	0.10801	0.97104	0.10471	0.96295
0.10425	0.97826	0.10828	0.97104	0.10599	0.96295
0.0984	0.97822	0.10815	0.97104	0.10581	0.96295
0.10306	0.97822	0.1074	0.97104	0.10571	0.96295
0.10275	0.97822	0.10787	0.97099	0.10512	0.96291
0.10399	0.97822	0.10824	0.97099	0.10674	0.96291
0.10302	0.97822	0.10796	0.97099	0.10589	0.96291
0.10429	0.97818	0.10767	0.97099	0.10544	0.96291
0.1032	0.97818	0.10818	0.97099	0.10566	0.96291
0.10419	0.97818	0.10823	0.97095	0.10573	0.96286
0.10318	0.97818	0.10772	0.97095	0.10539	0.96286
0.10369	0.97818	0.10759	0.97095	0.10724	0.96286
0.10795	0.97813	0.10814	0.97095	0.10558	0.96286
0.10553	0.97813	0.10936	0.9709	0.10673	0.96282
0.10611	0.97813	0.10814	0.9709	0.10604	0.96282
0.10558	0.97813	0.10915	0.9709	0.10604	0.96282
0.10452	0.97813	0.10804	0.9709	0.10562	0.96282
0.10662	0.97809	0.10911	0.9709	0.10631	0.96282
0.10583	0.97809	0.11935	0.97086	0.10682	0.96277
0.1057	0.97809	0.10924	0.97086	0.10781	0.96277
0.10451	0.97809	0.10968	0.97086	0.10553	0.96277
0.10545	0.97809	0.10992	0.97086	0.10708	0.96277
0.1047	0.97804	0.10809	0.97086	0.1065	0.96272
0.10516	0.97804	0.10855	0.97081	0.1071	0.96272
0.10502	0.97804	0.10828	0.97081	0.10646	0.96272
0.1048	0.97804	0.10805	0.97081	0.10715	0.96272
0.10434	0.97804	0.10966	0.97081	0.10763	0.96272
0.10542	0.978	0.11001	0.97081	0.10746	0.96272
0.10429	0.978	0.10898	0.97077	0.10738	0.96268
0.10531	0.978	0.1081	0.97077	0.10754	0.96268
0.10558	0.978	0.10934	0.97077	0.10787	0.96268
0.11435	0.97796	0.10915	0.97077	0.10851	0.96268
0.10731	0.97796	0.1095	0.97077	0.10727	0.96268
0.10736	0.97796	0.10973	0.97072	0.10991	0.96263
0.10698	0.97796	0.10997	0.97072	0.1101	0.96263
0.10693	0.97796	0.10847	0.97072	0.10997	0.96263
0.10479	0.97791	0.10932	0.97072	0.11006	0.96263
0.10563	0.97791	0.11838	0.97068	0.11065	0.96263
0.1063	0.97791	0.10992	0.97068	0.11079	0.96259
0.10759	0.97791	0.10892	0.97068	0.11092	0.96259
0.10383	0.97787	0.10879	0.97068	0.11076	0.96259
0.10447	0.97787	0.10943	0.97068	0.11134	0.96259
0.106	0.97787	0.10983	0.97063	0.11094	0.96254
0.10514	0.97787	0.1098	0.97063	0.11052	0.96254
0.10511	0.97787	0.10906	0.97063	0.11029	0.96254
0.10707	0.97787	0.10865	0.97063	0.11084	0.96254
0.10662	0.97782	0.10846	0.97063	0.11177	0.96254
0.10662	0.97782	0.10603	0.97059	0.11102	0.9625
0.10708	0.97782	0.10553	0.97059	0.11098	0.9625
0.10662	0.97782	0.10563	0.97059	0.11331	0.9625
0.10867	0.97782	0.1059	0.97059	0.11208	0.9625
0.10876	0.97778	0.10692	0.97059	0.1118	0.9625
0.108	0.97778	0.10567	0.97054	0.11236	0.96245
0.10795	0.97778	0.10726	0.97054	0.11199	0.96245
0.10876	0.97778	0.10576	0.97054	0.11341	0.96245
0.10881	0.97774	0.10657	0.97054	0.11294	0.96245
0.10845	0.97774	0.11121	0.9705	0.11349	0.96245
0.10858	0.97774	0.10731	0.9705	0.11419	0.9624
0.10887	0.97774	0.10668	0.9705	0.11381	0.9624
0.10908	0.97774	0.10721	0.9705	0.11387	0.9624
0.10145	0.97769	0.10694	0.9705	0.11336	0.9624
0.10667	0.97769	0.10745	0.97045	0.11349	0.9624
0.10784	0.97769	0.10744	0.97045	0.11327	0.96236
0.10761	0.97769	0.10687	0.97045	0.11369	0.96236
0.10698	0.97769	0.10712	0.97045	0.11294	0.96236
0.10831	0.97765	0.10715	0.97045	0.11349	0.96236
0.1069	0.97765	0.10594	0.97045	0.11401	0.96236
0.1074	0.97765	0.10597	0.97041	0.11455	0.96231
0.10798	0.97765	0.10591	0.97041	0.11532	0.96231
0.10896	0.97765	0.10712	0.97041	0.11381	0.96231
0.1199	0.97761	0.10544	0.97041	0.11404	0.96231
0.10782	0.97761	0.10457	0.97041	0.11369	0.96231
0.10863	0.97761	0.1054	0.97036	0.11522	0.96227
0.10955	0.97761	0.10611	0.97036	0.11488	0.96227
0.11025	0.97761	0.10645	0.97036	0.11513	0.96227
0.1074	0.97756	0.10722	0.97036	0.11442	0.96227
0.10917	0.97756	0.11734	0.97032	0.11485	0.96222
0.10885	0.97756	0.10741	0.97032	0.11432	0.96222
0.10947	0.97756	0.10768	0.97032	0.11431	0.96222
0.1095	0.97756	0.10806	0.97032	0.11422	0.96222
0.10768	0.97752	0.10787	0.97032	0.11432	0.96222
0.10859	0.97752	0.10713	0.97027	0.11501	0.96217
0.10759	0.97752	0.10893	0.97027	0.11487	0.96217
0.108	0.97752	0.10819	0.97027	0.11417	0.96217
0.10882	0.97752	0.1066	0.97027	0.11327	0.96217
0.10901	0.97747	0.10182	0.97023	0.11441	0.96217
0.10764	0.97747	0.09757	0.97023	0.11363	0.96213
0.10886	0.97747	0.10634	0.97023	0.11501	0.96213
0.10768	0.97747	0.10632	0.97023	0.1158	0.96213
0.11841	0.97743	0.10752	0.97023	0.11423	0.96213
0.10909	0.97743	0.108	0.97023	0.11476	0.96213
0.10959	0.97743	0.10845	0.97018	0.11478	0.96208
0.10918	0.97743	0.1086	0.97018	0.11524	0.96208
0.1095	0.97743	0.10818	0.97018	0.11534	0.96208
0.10882	0.97743	0.10682	0.97018	0.11555	0.96208
0.10983	0.97739	0.10769	0.97018	0.11441	0.96204
0.10937	0.97739	0.10918	0.97014	0.11459	0.96204
0.10886	0.97739	0.11022	0.97014	0.11464	0.96204
0.1095	0.97739	0.10987	0.97014	0.11628	0.96204
0.10306	0.97734	0.10915	0.97014	0.11601	0.96204
0.10873	0.97734	0.1093	0.97009	0.11395	0.96199
0.10877	0.97734	0.10901	0.97009	0.11478	0.96199
0.10955	0.97734	0.10966	0.97009	0.11492	0.96199
0.10873	0.97734	0.10962	0.97009	0.11456	0.96199
0.10885	0.9773	0.10842	0.97009	0.11531	0.96199
0.10867	0.9773	0.1014	0.97005	0.11394	0.96194
0.11011	0.9773	0.10841	0.97005	0.11451	0.96194
0.10904	0.9773	0.10838	0.97005	0.11331	0.96194
0.10978	0.9773	0.10874	0.97005	0.11354	0.96194
0.11362	0.97725	0.10828	0.97005	0.11536	0.9619
0.11115	0.97725	0.10906	0.97	0.11381	0.9619
0.11066	0.97725	0.10832	0.97	0.11324	0.9619
0.11247	0.97725	0.10932	0.97	0.11445	0.9619
0.1111	0.97721	0.1101	0.97	0.11377	0.9619
0.11151	0.97721	0.10982	0.97	0.11473	0.9619
0.11206	0.97721	0.11083	0.96996	0.11312	0.96185
0.11151	0.97721	0.10982	0.96996	0.11377	0.96185
0.11164	0.97721	0.11106	0.96996	0.11404	0.96185
0.10182	0.97717	0.10989	0.96996	0.11327	0.96185
0.11179	0.97717	0.10927	0.96996	0.11231	0.96181
0.11201	0.97717	0.11025	0.96991	0.11308	0.96181
0.11234	0.97717	0.11048	0.96991	0.11239	0.96181
0.11133	0.97717	0.10975	0.96991	0.11332	0.96181
0.11211	0.97712	0.11121	0.96991	0.11239	0.96181
0.11215	0.97712	0.10256	0.96987	0.11257	0.96176
0.11216	0.97712	0.10938	0.96987	0.11243	0.96176
0.11303	0.97712	0.10916	0.96987	0.11199	0.96176
0.11408	0.97712	0.10892	0.96987	0.11282	0.96176
0.1241	0.97708	0.11008	0.96987	0.11382	0.96172
0.11463	0.97708	0.10978	0.96982	0.11299	0.96172
0.11408	0.97708	0.10997	0.96982	0.11349	0.96172
0.11418	0.97708	0.11022	0.96982	0.11413	0.96172
0.11516	0.97708	0.10962	0.96982	0.1125	0.96172
0.11471	0.97704	0.11085	0.96982	0.11354	0.96167
0.11395	0.97704	0.11986	0.96978	0.11446	0.96167
0.11518	0.97704	0.11195	0.96978	0.11468	0.96167
0.1138	0.97704	0.11103	0.96978	0.11433	0.96167
0.10576	0.97699	0.11043	0.96978	0.11313	0.96167
0.1143	0.97699	0.11144	0.96973	0.11405	0.96162
0.11499	0.97699	0.11071	0.96973	0.11524	0.96162
0.11413	0.97699	0.11017	0.96973	0.11468	0.96162
0.11502	0.97699	0.11102	0.96973	0.1155	0.96162
0.11261	0.97695	0.1107	0.96973	0.11381	0.96162
0.11431	0.97695	0.10448	0.96969	0.11387	0.96158
0.11444	0.97695	0.11089	0.96969	0.11369	0.96158
0.11562	0.97695	0.11172	0.96969	0.11409	0.96158
0.11499	0.97695	0.10939	0.96969	0.11566	0.96158
0.12433	0.9769	0.11066	0.96969	0.11596	0.96153
0.11542	0.9769	0.11112	0.96969	0.11614	0.96153
0.11564	0.9769	0.11024	0.96964	0.11571	0.96153
0.11586	0.9769	0.11117	0.96964	0.11646	0.96153
0.116	0.97686	0.10918	0.96964	0.11661	0.96153
0.11564	0.97686	0.11043	0.96964	0.11619	0.96149
0.11581	0.97686	0.11469	0.9696	0.11615	0.96149
0.11655	0.97686	0.11234	0.9696	0.11697	0.96149
0.11705	0.97686	0.11171	0.9696	0.1173	0.96149
0.10851	0.97682	0.11177	0.9696	0.11702	0.96149
0.11495	0.97682	0.11203	0.9696	0.1167	0.96144
0.1164	0.97682	0.11167	0.96955	0.11623	0.96144
0.1155	0.97682	0.1127	0.96955	0.11715	0.96144
0.11669	0.97682	0.11215	0.96955	0.11783	0.96144
0.1165	0.97677	0.11185	0.96955	0.11771	0.96144
0.11518	0.97677	0.10586	0.96951	0.11771	0.96139
0.11518	0.97677	0.11075	0.96951	0.11794	0.96139
0.11585	0.97677	0.11345	0.96951	0.11908	0.96139
0.11527	0.97677	0.11303	0.96951	0.11871	0.96139
0.12501	0.97673	0.11299	0.96951	0.11994	0.96139
0.11612	0.97673	0.11231	0.96951	0.11963	0.96135
0.11516	0.97673	0.11239	0.96946	0.11911	0.96135
0.11635	0.97673	0.11248	0.96946	0.11972	0.96135
0.11519	0.97668	0.11176	0.96946	0.11935	0.96135
0.11558	0.97668	0.11215	0.96946	0.12045	0.96135
0.11592	0.97668	0.11112	0.96946	0.1209	0.9613
0.11595	0.97668	0.11322	0.96942	0.11996	0.9613
0.115	0.97668	0.11394	0.96942	0.12115	0.9613
0.11613	0.97668	0.11299	0.96942	0.12045	0.9613
0.11514	0.97664	0.11378	0.96942	0.12055	0.9613
0.11471	0.97664	0.11303	0.96937	0.12055	0.96126
0.11395	0.97664	0.11349	0.96937	0.12055	0.96126
0.11366	0.97664	0.11369	0.96937	0.12032	0.96126
0.11499	0.97664	0.11362	0.96937	0.12083	0.96126
0.11418	0.9766	0.11336	0.96937	0.12293	0.96126
0.11435	0.9766	0.11227	0.96933	0.12108	0.96121
0.11399	0.9766	0.11239	0.96933	0.12154	0.96121
0.11436	0.9766	0.11259	0.96933	0.12182	0.96121
0.1266	0.97655	0.11276	0.96933	0.12196	0.96121
0.11632	0.97655	0.11313	0.96933	0.12274	0.96117
0.11603	0.97655	0.1127	0.96928	0.12145	0.96117
0.11581	0.97655	0.11307	0.96928	0.122	0.96117
0.11353	0.97651	0.11413	0.96928	0.12424	0.96117
0.11525	0.97651	0.11368	0.96928	0.12315	0.96117
0.11578	0.97651	0.11299	0.96928	0.12279	0.96112
0.11627	0.97651	0.1227	0.96924	0.1221	0.96112
0.11532	0.97651	0.1127	0.96924	0.12237	0.96112
0.11608	0.97651	0.11346	0.96924	0.12353	0.96112
0.10396	0.97647	0.11404	0.96924	0.1226	0.96112
0.11339	0.97647	0.11474	0.96924	0.12283	0.96107
0.11407	0.97647	0.11465	0.9692	0.12324	0.96107
0.11353	0.97647	0.11414	0.9692	0.12307	0.96107
0.11477	0.97647	0.11385	0.9692	0.1229	0.96107
0.11481	0.97642	0.11359	0.9692	0.12332	0.96107
0.11536	0.97642	0.11108	0.96915	0.12301	0.96103
0.11565	0.97642	0.11446	0.96915	0.12466	0.96103
0.11331	0.97642	0.11417	0.96915	0.12401	0.96103
0.11947	0.97638	0.11529	0.96915	0.12296	0.96103
0.11733	0.97638	0.11478	0.96915	0.12387	0.96103
0.11595	0.97638	0.11518	0.96911	0.12297	0.96098
0.11714	0.97638	0.11518	0.96911	0.12298	0.96098
0.11658	0.97638	0.11568	0.96911	0.12343	0.96098
0.11641	0.97633	0.11596	0.96911	0.12292	0.96098
0.11681	0.97633	0.12158	0.96906	0.12352	0.96094
0.11544	0.97633	0.1173	0.96906	0.12443	0.96094
0.1159	0.97633	0.1161	0.96906	0.12279	0.96094
0.10959	0.97629	0.11591	0.96906	0.12375	0.96094
0.11528	0.97629	0.11589	0.96906	0.12259	0.96094
0.11509	0.97629	0.11611	0.96902	0.12237	0.96089
0.11539	0.97629	0.11633	0.96902	0.12182	0.96089
0.11678	0.97629	0.11624	0.96902	0.12251	0.96089
0.11635	0.97629	0.1172	0.96902	0.12348	0.96089
0.11594	0.97625	0.11707	0.96902	0.1232	0.96089
0.1156	0.97625	0.10568	0.96897	0.12241	0.96084
0.11742	0.97625	0.11559	0.96897	0.12279	0.96084
0.11737	0.97625	0.1167	0.96897	0.12201	0.96084
0.12629	0.9762	0.1167	0.96897	0.12348	0.96084
0.11747	0.9762	0.11536	0.96897	0.12296	0.96084
0.11798	0.9762	0.11687	0.96893	0.12218	0.9608
0.1171	0.9762	0.11707	0.96893	0.12261	0.9608
0.11695	0.9762	0.11873	0.96893	0.12284	0.9608
0.11811	0.97616	0.11753	0.96893	0.12283	0.9608
0.11727	0.97616	0.11693	0.96893	0.12269	0.96075
0.11742	0.97616	0.12966	0.96888	0.12324	0.96075
0.11865	0.97616	0.11757	0.96888	0.12265	0.96075
0.11805	0.97616	0.1166	0.96888	0.12376	0.96075
0.11649	0.97611	0.11671	0.96888	0.12424	0.96075
0.1172	0.97611	0.11568	0.96888	0.12406	0.96071
0.11706	0.97611	0.11738	0.96884	0.12348	0.96071
0.11604	0.97611	0.11586	0.96884	0.12279	0.96071
0.11719	0.97607	0.1162	0.96884	0.1239	0.96071
0.11791	0.97607	0.11688	0.96884	0.12375	0.96071
0.11772	0.97607	0.11697	0.96884	0.12411	0.96066
0.11819	0.97607	0.10819	0.96879	0.1233	0.96066
0.11844	0.97607	0.1139	0.96879	0.12403	0.96066
0.12652	0.97603	0.11511	0.96879	0.12389	0.96066
0.11784	0.97603	0.1162	0.96879	0.12544	0.96066
0.11833	0.97603	0.11564	0.96879	0.12318	0.96061
0.11797	0.97603	0.11729	0.96879	0.12438	0.96061
0.11905	0.97603	0.11642	0.96875	0.12488	0.96061
0.11812	0.97598	0.11538	0.96875	0.12411	0.96061
0.11802	0.97598	0.11769	0.96875	0.12489	0.96061
0.11821	0.97598	0.11752	0.96875	0.12488	0.96057
0.11892	0.97598	0.11783	0.96875	0.12483	0.96057
0.11846	0.97598	0.1167	0.96875	0.12468	0.96057
0.11809	0.97594	0.12082	0.9687	0.12359	0.96057
0.11718	0.97594	0.11767	0.9687	0.12425	0.96052
0.11766	0.97594	0.11797	0.9687	0.12494	0.96052
0.11761	0.97594	0.11718	0.9687	0.12419	0.96052
0.11741	0.97594	0.11679	0.9687	0.12474	0.96052
0.1187	0.97589	0.11706	0.96866	0.12387	0.96052
0.11821	0.97589	0.1178	0.96866	0.12484	0.96048
0.11779	0.97589	0.11749	0.96866	0.12636	0.96048
0.11809	0.97589	0.11804	0.96866	0.12606	0.96048
0.12679	0.97585	0.11834	0.96866	0.12544	0.96048
0.12042	0.97585	0.11936	0.96866	0.12433	0.96048
0.11861	0.97585	0.10829	0.96861	0.12671	0.96043
0.11934	0.97585	0.11824	0.96861	0.12484	0.96043
0.11856	0.97585	0.11718	0.96861	0.12589	0.96043
0.11915	0.97585	0.11811	0.96861	0.12563	0.96043
0.1172	0.97581	0.11847	0.96861	0.12581	0.96043
0.11732	0.97581	0.11857	0.96857	0.12645	0.96039
0.11749	0.97581	0.11875	0.96857	0.12636	0.96039
0.11883	0.97581	0.11856	0.96857	0.12608	0.96039
0.11855	0.97581	0.11848	0.96857	0.12497	0.96039
0.1122	0.97576	0.11945	0.96857	0.1253	0.96034
0.11681	0.97576	0.11958	0.96852	0.12567	0.96034
0.11687	0.97576	0.12935	0.96852	0.12534	0.96034
0.11706	0.97576	0.12036	0.96852	0.12684	0.96034
0.11606	0.97576	0.12032	0.96852	0.12589	0.96034
0.11674	0.97576	0.12017	0.96852	0.12544	0.96029
0.11645	0.97572	0.12164	0.96852	0.12571	0.96029
0.11763	0.97572	0.1179	0.96848	0.12673	0.96029
0.11807	0.97572	0.11921	0.96848	0.12489	0.96029
0.11682	0.97572	0.11958	0.96848	0.12563	0.96029
0.11691	0.97572	0.11986	0.96848	0.12639	0.96025
0.11819	0.97572	0.12027	0.96848	0.12553	0.96025
0.11827	0.97568	0.11024	0.96843	0.12623	0.96025
0.1193	0.97568	0.11847	0.96843	0.12617	0.96025
0.12047	0.97568	0.1193	0.96843	0.12595	0.96025
0.11982	0.97568	0.12009	0.96843	0.1269	0.9602
0.11856	0.97568	0.12071	0.96843	0.12659	0.9602
0.11907	0.97563	0.12089	0.96843	0.12687	0.9602
0.11953	0.97563	0.12099	0.96839	0.12655	0.9602
0.11874	0.97563	0.12229	0.96839	0.12655	0.96016
0.11989	0.97563	0.12032	0.96839	0.12707	0.96016
0.1198	0.97563	0.12106	0.96839	0.12791	0.96016
0.11912	0.97563	0.12149	0.96839	0.12548	0.96016
0.11892	0.97559	0.12219	0.96834	0.12636	0.96016
0.11876	0.97559	0.12152	0.96834	0.1278	0.96016
0.1197	0.97559	0.12101	0.96834	0.12767	0.96011
0.12008	0.97559	0.12009	0.96834	0.12727	0.96011
0.12003	0.97559	0.12182	0.96834	0.12759	0.96011
0.11998	0.97554	0.12124	0.9683	0.12759	0.96011
0.12075	0.97554	0.12143	0.9683	0.12997	0.96006
0.12042	0.97554	0.12108	0.9683	0.12931	0.96006
0.12038	0.97554	0.12136	0.9683	0.12815	0.96006
0.12175	0.97554	0.12064	0.9683	0.12893	0.96006
0.13091	0.9755	0.11569	0.96825	0.13118	0.96002
0.12126	0.9755	0.1215	0.96825	0.13015	0.96002
0.12125	0.9755	0.12055	0.96825	0.13045	0.96002
0.12095	0.9755	0.12126	0.96825	0.13218	0.96002
0.12035	0.9755	0.12233	0.96825	0.1328	0.95997
0.12148	0.97546	0.12191	0.96821	0.13208	0.95997
0.12175	0.97546	0.12122	0.96821	0.1328	0.95997
0.12198	0.97546	0.12169	0.96821	0.13392	0.95993
0.12162	0.97546	0.12113	0.96821	0.13317	0.95993
0.12231	0.97546	0.11976	0.96821	0.13287	0.95993
0.11628	0.97541	0.1279	0.96816	0.1332	0.95988
0.11491	0.97541	0.12155	0.96816	0.13392	0.95988
0.12074	0.97541	0.12219	0.96816	0.13418	0.95988
0.11996	0.97541	0.12009	0.96816	0.13501	0.95983
0.1213	0.97541	0.12127	0.96816	0.13359	0.95983
0.12143	0.97541	0.12219	0.96812	0.13512	0.95979
0.12121	0.97537	0.12182	0.96812	0.13371	0.95979
0.12246	0.97537	0.12256	0.96812	0.13548	0.95974
0.12212	0.97537	0.12183	0.96812	0.13456	0.95974
0.12222	0.97537	0.12219	0.96812	0.13559	0.9597
0.12098	0.97537	0.12324	0.96812	0.13531	0.9597
0.12808	0.97532	0.12096	0.96807	0.13522	0.95965
0.12223	0.97532	0.12183	0.96807	0.13622	0.95965
0.12364	0.97532	0.12145	0.96807	0.13629	0.95961
0.12199	0.97532	0.12223	0.96807	0.13786	0.95961
0.12052	0.97532	0.122	0.96807	0.13724	0.95956
0.12031	0.97532	0.12325	0.96803	0.13915	0.95956
0.12166	0.97528	0.12223	0.96803	0.13977	0.95951
0.12149	0.97528	0.12316	0.96803	0.14033	0.95951
0.12167	0.97528	0.12315	0.96803	0.14066	0.95947
0.1208	0.97528	0.12284	0.96803	0.14234	0.95947
0.12089	0.97528	0.13206	0.96798	0.14282	0.95942
0.11184	0.97524	0.12439	0.96798	0.14255	0.95942
0.12052	0.97524	0.12357	0.96798	0.14243	0.95938
0.1198	0.97524	0.12512	0.96798	0.14381	0.95933
0.12098	0.97524	0.12476	0.96798	0.14464	0.95933
0.1212	0.97524	0.12411	0.96794	0.14475	0.95928
0.11979	0.97519	0.12417	0.96794	0.14529	0.95924
0.12112	0.97519	0.12348	0.96794	0.14656	0.95924
0.12254	0.97519	0.12434	0.96794	0.14648	0.95919
0.12172	0.97519	0.12497	0.96794	0.1481	0.95915
0.12186	0.97519	0.12475	0.96794	0.14927	0.95915
0.12858	0.97515	0.12327	0.96789	0.14922	0.9591
0.12237	0.97515	0.12359	0.96789	0.14888	0.95906
0.12298	0.97515	0.12452	0.96789	0.15085	0.95906
0.12282	0.97515	0.12502	0.96789	0.14884	0.95901
0.12237	0.97515	0.12315	0.96789	0.14966	0.95896
0.1231	0.97511	0.12522	0.96785	0.1514	0.95892
0.12422	0.97511	0.12489	0.96785	0.15104	0.95892
0.1231	0.97511	0.12494	0.96785	0.15185	0.95887
0.12353	0.97511	0.12507	0.96785	0.15378	0.95883
0.12336	0.97511	0.12488	0.96785	0.15149	0.95883
0.12451	0.97511	0.13518	0.9678	0.1528	0.95878
0.12007	0.97506	0.1269	0.9678	0.1514	0.95873
0.1241	0.97506	0.12662	0.9678	0.15084	0.95869
0.12358	0.97506	0.12682	0.9678	0.15183	0.95864
0.12372	0.97506	0.12552	0.9678	0.15254	0.9586
0.12408	0.97506	0.12662	0.96776	0.15269	0.9586
0.12437	0.97502	0.12675	0.96776	0.15239	0.9585
0.12518	0.97502	0.12634	0.96776	0.15363	0.9585
0.12422	0.97502	0.12777	0.96776	0.15381	0.95846
0.12487	0.97502	0.12713	0.96776	0.15468	0.95841
0.12625	0.97502	0.12068	0.96771	0.15424	0.95837
0.12606	0.97497	0.1258	0.96771	0.15708	0.95832
0.12642	0.97497	0.1265	0.96771	0.15725	0.95828
0.12661	0.97497	0.12613	0.96771	0.15803	0.95823
0.12685	0.97497	0.12704	0.96771	0.15708	0.95818
0.12707	0.97493	0.12704	0.96771	0.15605	0.95814
0.12701	0.97493	0.12753	0.96767	0.1572	0.95809
0.12708	0.97493	0.12687	0.96767	0.15814	0.95805
0.12624	0.97493	0.1278	0.96767	0.15966	0.95795
0.12791	0.97493	0.12782	0.96767	0.15882	0.95795
0.12134	0.97489	0.12916	0.96767	0.15995	0.95791
0.12778	0.97489	0.12899	0.96762	0.16034	0.95782
0.12702	0.97489	0.12806	0.96762	0.16046	0.95782
0.12772	0.97489	0.12938	0.96762	0.16096	0.95772
0.12825	0.97489	0.13027	0.96762	0.16257	0.95768
0.12735	0.97489	0.12887	0.96758	0.16175	0.95763
0.12791	0.97484	0.12975	0.96758	0.16131	0.95759
0.12674	0.97484	0.13042	0.96758	0.16292	0.95754
0.12864	0.97484	0.13064	0.96758	0.1621	0.9575
0.12827	0.97484	0.12287	0.96753	0.16138	0.9574
0.14016	0.9748	0.12901	0.96753	0.16229	0.9574
0.12931	0.9748	0.12961	0.96753	0.16306	0.95731
0.12932	0.9748	0.13	0.96753	0.16168	0.95717
0.12977	0.9748	0.12907	0.96753	0.16246	0.95695
0.12964	0.9748	0.12987	0.96749	0.16329	0.95695
0.12991	0.97475	0.12898	0.96749	0.16186	0.95685
0.1301	0.97475	0.13014	0.96749	0.16293	0.95681
0.13109	0.97475	0.13045	0.96749	0.16383	0.95672
0.13139	0.97475	0.1312	0.96744	0.16376	0.95667
0.12928	0.97471	0.13153	0.96744	0.16485	0.95662
0.12963	0.97471	0.13209	0.96744	0.16493	0.95653
0.12984	0.97471	0.1311	0.96744	0.16566	0.95649
0.12894	0.97471	0.1318	0.9674	0.16586	0.95626
0.13047	0.97467	0.13247	0.9674	0.16758	0.95607
0.12872	0.97467	0.13166	0.9674	0.16841	0.95598
0.13032	0.97467	0.12206	0.96735	0.16815	0.95594
0.12976	0.97467	0.1321	0.96735	0.16479	0.9558
0.14099	0.97462	0.13218	0.96735	0.16413	0.95575
0.13011	0.97462	0.13366	0.96735	0.16678	0.95571
0.13105	0.97462	0.13411	0.96731	0.16839	0.95557
0.13192	0.97462	0.13448	0.96731	0.16899	0.95552
0.13338	0.97458	0.1351	0.96731	0.17254	0.95543
0.13141	0.97458	0.14243	0.96726	0.17185	0.95539
0.13151	0.97458	0.13326	0.96726	0.17252	0.95534
0.12223	0.97454	0.13399	0.96726	0.17549	0.9552
0.13113	0.97454	0.13557	0.96726	0.1773	0.95516
0.1297	0.97454	0.13576	0.96722	0.17864	0.95502
0.12935	0.97454	0.13527	0.96722	0.18017	0.95497
0.12981	0.97449	0.13582	0.96722	0.18103	0.95493
0.1302	0.97449	0.13652	0.96717	0.1775	0.95484
0.13021	0.97449	0.13683	0.96717	0.18073	0.95474
0.13862	0.97445	0.13648	0.96717	0.18237	0.9547
0.13288	0.97445	0.13647	0.96713	0.18366	0.95456
0.13239	0.97445	0.13698	0.96713	0.18489	0.95451
0.13247	0.9744	0.13852	0.96713	0.18648	0.95442
0.13288	0.9744	0.13706	0.96708	0.18645	0.95433
0.13252	0.9744	0.13814	0.96708	0.18553	0.95428
0.1278	0.97436	0.13776	0.96704	0.18631	0.95419
0.13221	0.97436	0.13999	0.96704	0.18657	0.9541
0.13193	0.97432	0.13908	0.96704	0.18837	0.95401
0.13275	0.97432	0.13201	0.96699	0.18981	0.95396
0.13175	0.97432	0.1394	0.96699	0.19042	0.95387
0.13175	0.97432	0.13804	0.96699	0.1932	0.95373
0.13295	0.97427	0.14005	0.96695	0.19646	0.9536
0.13316	0.97427	0.13954	0.96695	0.20149	0.95337
0.13263	0.97423	0.14897	0.9669	0.20339	0.95318
0.13257	0.97423	0.14208	0.9669	0.20302	0.95314
0.13294	0.97423	0.14246	0.9669	0.204	0.95305
0.13093	0.97418	0.14252	0.96686	0.20245	0.95291
0.13266	0.97418	0.14284	0.96686	0.20171	0.95286
0.13331	0.97414	0.14215	0.96681	0.2026	0.95273
0.13388	0.97414	0.14107	0.96677	0.20487	0.95268
0.13458	0.97414	0.14237	0.96677	0.20623	0.95254
0.14176	0.9741	0.15296	0.96672	0.20731	0.9525
0.13449	0.9741	0.14409	0.96672	0.20583	0.9524
0.13414	0.97405	0.14381	0.96668	0.20893	0.95231
0.13419	0.97405	0.14423	0.96668	0.20899	0.95222
0.13467	0.97405	0.13701	0.96663	0.21055	0.95217
0.13321	0.97401	0.14512	0.96663	0.20972	0.9519
0.13433	0.97401	0.14516	0.96659	0.21118	0.95162
0.13599	0.97396	0.14675	0.96659	0.21335	0.95149
0.13498	0.97396	0.14754	0.96654	0.21172	0.95135
0.14207	0.97392	0.14813	0.9665	0.21265	0.9513
0.13579	0.97392	0.14829	0.9665	0.21492	0.95121
0.1362	0.97392	0.14073	0.96645	0.21508	0.95107
0.13682	0.97388	0.14866	0.96645	0.21595	0.95103
0.13641	0.97388	0.14989	0.96641	0.21831	0.95084
0.13621	0.97383	0.15568	0.96636	0.21755	0.9508
0.1374	0.97383	0.15187	0.96632	0.2205	0.95066
0.13844	0.97379	0.1526	0.96632	0.21763	0.95057
0.13783	0.97379	0.14265	0.96627	0.21596	0.95052
0.14034	0.97375	0.1522	0.96627	0.21545	0.95039
0.13863	0.97375	0.15325	0.96623	0.21546	0.95029
0.13988	0.9737	0.16538	0.96618	0.21493	0.9502
0.139	0.9737	0.1555	0.96614	0.21499	0.95006
0.1323	0.97366	0.15525	0.96614	0.21596	0.94997
0.14017	0.97366	0.15582	0.96609	0.21665	0.94983
0.14151	0.97361	0.15669	0.96605	0.21819	0.94974
0.15344	0.97357	0.16668	0.966	0.22074	0.94965
0.14208	0.97357	0.15815	0.966	0.22471	0.94951
0.14147	0.97353	0.15827	0.96596	0.22738	0.94942
0.1423	0.97353	0.15019	0.96591	0.22901	0.94924
0.14051	0.97348	0.15983	0.96591	0.2287	0.94919
0.14328	0.97348	0.15883	0.96587	0.22806	0.9491
0.14356	0.97344	0.16633	0.96582	0.22818	0.94896
0.15257	0.97339	0.16118	0.96578	0.23075	0.94887
0.14258	0.97335	0.15325	0.96573	0.2331	0.94873
0.14389	0.97335	0.16019	0.96569	0.23654	0.94864
0.13193	0.97331	0.1608	0.96569	0.23676	0.94855
0.14343	0.97331	0.16264	0.9656	0.23818	0.94837
0.14399	0.97326	0.16217	0.9656	0.24098	0.94832
0.14507	0.97322	0.16257	0.96555	0.24301	0.94823
0.14483	0.97318	0.16297	0.96551	0.24512	0.94805
0.13691	0.97313	0.17206	0.96546	0.24549	0.94795
0.14346	0.97313	0.16391	0.96542	0.24252	0.94782
0.14502	0.97309	0.16652	0.96542	0.24255	0.94772
0.15401	0.97304	0.16601	0.96533	0.24064	0.94768
0.14608	0.973	0.16715	0.96533	0.24116	0.9475
0.14675	0.973	0.1698	0.96524	0.24241	0.94745
0.14684	0.97291	0.17	0.96524	0.24799	0.94727
0.14679	0.97291	0.16949	0.96515	0.25051	0.94717
0.14961	0.97287	0.16989	0.96515	0.25178	0.94708
0.14866	0.97282	0.17257	0.96506	0.25345	0.94694
0.14246	0.97278	0.17343	0.96506	0.25619	0.94685
0.14934	0.97274	0.17265	0.96497	0.25625	0.94667
0.1502	0.97274	0.1726	0.96497	0.25599	0.94658
0.15216	0.97265	0.18318	0.96492	0.25554	0.94649
0.15178	0.97265	0.16834	0.96483	0.25106	0.94635
0.15066	0.97261	0.16794	0.96483	0.25122	0.94626
0.15041	0.97256	0.18746	0.96474	0.25738	0.94607
0.15469	0.97252	0.17822	0.96474	0.2582	0.94603
0.1542	0.97247	0.16175	0.96465	0.25731	0.94594
0.1527	0.97243	0.17243	0.96465	0.2506	0.94575
0.15266	0.97239	0.18809	0.96456	0.2495	0.94566
0.15425	0.97234	0.17894	0.96452	0.25326	0.94548
0.15362	0.9723	0.17786	0.96447	0.25543	0.94539
0.14649	0.97225	0.17797	0.96443	0.2521	0.94529
0.15378	0.97221	0.18818	0.96438	0.25359	0.94511
0.16294	0.97217	0.17227	0.96429	0.25341	0.94502
0.15273	0.97208	0.17273	0.96429	0.25744	0.94484
0.14835	0.97208	0.19182	0.9642	0.25818	0.94474
0.1636	0.97199	0.18034	0.96416	0.25901	0.94465
0.15764	0.97199	0.17176	0.96411	0.26064	0.94447
0.15085	0.9719	0.17985	0.96407	0.26117	0.94438
0.15764	0.97186	0.18215	0.96398	0.26246	0.94419
0.16254	0.97182	0.17276	0.96393	0.26146	0.9441
0.15956	0.97177	0.17959	0.96389	0.25936	0.94401
0.15828	0.97173	0.18831	0.96384	0.25868	0.94378
0.15837	0.97168	0.17878	0.9638	0.26143	0.94373
0.16212	0.9716	0.17782	0.96371	0.26418	0.9435
0.15344	0.97155	0.18617	0.96366	0.26247	0.94341
0.16072	0.97151	0.16767	0.96357	0.26138	0.94328
0.16926	0.97146	0.17366	0.96353	0.26299	0.94314
0.16334	0.97142	0.1774	0.96344	0.2646	0.943
0.16177	0.97133	0.17099	0.96339	0.26711	0.94291
0.17153	0.97129	0.1911	0.9633	0.26652	0.94273
0.15823	0.9712	0.18261	0.96326	0.26762	0.94263
0.16087	0.9712	0.18031	0.96317	0.27108	0.9424
0.172	0.97111	0.18929	0.96312	0.26724	0.94227
0.16346	0.97107	0.18544	0.96308	0.2722	0.94208
0.163	0.97098	0.18214	0.96299	0.27194	0.94199
0.17134	0.97094	0.19442	0.96294	0.27534	0.9419
0.15368	0.97085	0.18004	0.96285	0.27703	0.94172
0.16182	0.97081	0.1867	0.96281	0.27775	0.94158
0.17349	0.97076	0.19029	0.96272	0.27972	0.94149
0.16403	0.97072	0.1802	0.96267	0.27717	0.94126
0.16295	0.97068	0.19679	0.96258	0.27972	0.94117
0.16807	0.97054	0.19076	0.96254	0.28603	0.94098
0.16728	0.97054	0.18913	0.96245	0.28564	0.94084
0.17347	0.97041	0.19918	0.9624	0.28587	0.94075
0.16972	0.97037	0.18068	0.96231	0.28688	0.94057
0.1663	0.97032	0.19368	0.96227	0.28659	0.94048
0.17471	0.97024	0.1891	0.96213	0.28567	0.94025
0.16632	0.97015	0.18865	0.96213	0.28511	0.94016
0.17271	0.97011	0.19614	0.962	0.28553	0.94006
0.17622	0.97002	0.18808	0.96195	0.28561	0.93984
0.1689	0.96997	0.20654	0.96186	0.2862	0.93974
0.17469	0.96993	0.19908	0.96182	0.2886	0.93951
0.17712	0.96984	0.18932	0.96177	0.28855	0.93938
0.16989	0.9698	0.2122	0.96168	0.29425	0.93919
0.1903	0.96971	0.19899	0.96159	0.29191	0.93906
0.17928	0.96967	0.21032	0.9615	0.29085	0.93896
0.17833	0.96958	0.2039	0.96146	0.2949	0.93878
0.18692	0.96954	0.20348	0.96137	0.29464	0.93864
0.17673	0.9694	0.20967	0.96128	0.29497	0.93851
0.17934	0.9694	0.20482	0.96119	0.29958	0.93828
0.17036	0.96927	0.21125	0.96114	0.30127	0.93823
0.17999	0.96923	0.19259	0.96105	0.30183	0.93795
0.18114	0.96914	0.2091	0.96096	0.30432	0.93786
0.17176	0.9691	0.19482	0.96087	0.30417	0.93773
0.18717	0.96901	0.20583	0.96083	0.30532	0.93754
0.17311	0.96892	0.21575	0.96074	0.30629	0.93745
0.18267	0.96888	0.20624	0.96065	0.30754	0.93717
0.18552	0.96879	0.21703	0.9606	0.30897	0.93713
0.17865	0.9687	0.20675	0.96047	0.31257	0.93699
0.19021	0.96861	0.22377	0.96042	0.31568	0.93676
0.17944	0.96857	0.20531	0.96033	0.31631	0.93662
0.19679	0.96848	0.22349	0.96024	0.32069	0.93644
0.1881	0.96844	0.20656	0.96015	0.32185	0.9363
0.19588	0.96831	0.22498	0.96006	0.32087	0.93621
0.18855	0.96826	0.21362	0.95997	0.3198	0.93603
0.18951	0.96818	0.2215	0.95993	0.31778	0.93589
0.19185	0.96809	0.22964	0.95984	0.31512	0.93566
0.19067	0.968	0.21925	0.95975	0.31322	0.93557
0.19919	0.96796	0.23357	0.9597	0.31559	0.93543
0.19048	0.96782	0.22117	0.95957	0.31206	0.9352
0.20003	0.96778	0.23211	0.95952	0.31391	0.93506
0.18419	0.96765	0.21927	0.95943	0.31622	0.93483
0.20362	0.96761	0.23558	0.95934	0.31664	0.9347
0.19399	0.96756	0.22141	0.95921	0.31785	0.93461
0.20083	0.96743	0.23362	0.95916	0.32152	0.93438
0.19506	0.96739	0.21833	0.95907	0.32234	0.93424
0.20471	0.96725	0.2371	0.95898	0.32512	0.93401
0.19613	0.96721	0.22124	0.95889	0.3261	0.93392
0.20288	0.96708	0.23932	0.9588	0.32711	0.93378
0.19633	0.96704	0.23047	0.95876	0.32888	0.93351
0.20668	0.9669	0.24255	0.95862	0.33203	0.93337
0.19689	0.96686	0.23315	0.95858	0.33462	0.93318
0.20683	0.96673	0.24029	0.95844	0.33539	0.93305
0.19277	0.96664	0.22841	0.95835	0.33436	0.93291
0.20721	0.96655	0.24175	0.95826	0.33729	0.93272
0.19178	0.96646	0.23513	0.95822	0.33836	0.93259
0.19892	0.96642	0.24474	0.95808	0.34129	0.93245
0.19221	0.96629	0.23541	0.95804	0.34227	0.93217
0.20154	0.96625	0.24558	0.9579	0.34297	0.93208
0.19543	0.96611	0.22892	0.95781	0.34744	0.93185
0.20355	0.96607	0.24693	0.95768	0.34916	0.93172
0.1946	0.96594	0.23357	0.95763	0.35084	0.93149
0.21407	0.96585	0.2445	0.95754	0.35241	0.93139
0.19753	0.96572	0.23141	0.95745	0.35233	0.93126
0.21406	0.96568	0.24987	0.95736	0.35363	0.93098
0.21296	0.9655	0.2346	0.95723	0.35372	0.93089
0.21099	0.96546	0.25153	0.95718	0.35636	0.93075
0.2145	0.96533	0.23936	0.95705	0.35976	0.93052
0.20875	0.96528	0.25336	0.957	0.36055	0.93043
0.21678	0.96515	0.24293	0.95687	0.36589	0.93016
0.20092	0.96506	0.25217	0.95678	0.36772	0.93006
0.20802	0.96502	0.25541	0.95664	0.36969	0.92983
0.20069	0.96484	0.23963	0.95655	0.36741	0.9297
0.21771	0.9648	0.25569	0.95642	0.36824	0.92956
0.20824	0.96467	0.23981	0.95637	0.36694	0.92938
0.22181	0.96458	0.25354	0.95628	0.36629	0.92924
0.21539	0.96445	0.23801	0.95619	0.36488	0.9291
0.21427	0.9644	0.25924	0.9561	0.36496	0.92883
0.22568	0.96423	0.25614	0.95592	0.35871	0.92873
0.20867	0.96418	0.25543	0.95588	0.36103	0.9285
0.21776	0.96405	0.26809	0.95574	0.36446	0.92837
0.20932	0.96396	0.24075	0.95566	0.37367	0.92814
0.21108	0.96383	0.25769	0.95552	0.37613	0.928
0.22252	0.96375	0.25005	0.95543	0.37837	0.92786
0.21285	0.96361	0.26675	0.95538	0.37958	0.92759
0.232	0.96353	0.2665	0.9552	0.37831	0.9275
0.23118	0.96339	0.26545	0.95516	0.38355	0.92736
0.22366	0.96335	0.26813	0.95498	0.38506	0.92708
0.22087	0.96326	0.25489	0.95493	0.38568	0.92694
0.21682	0.96309	0.26522	0.9548	0.38648	0.92672
0.23559	0.96304	0.25498	0.95471	0.38819	0.92658
0.23355	0.96287	0.24648	0.95457	0.38939	0.92644
0.23018	0.96282	0.26006	0.95449	0.39096	0.92626
0.23666	0.96265	0.25013	0.95435	0.39282	0.92612
0.22106	0.96261	0.25906	0.95426	0.39409	0.92584
0.22316	0.96243	0.26634	0.95413	0.394	0.92571
0.23509	0.96234	0.24896	0.95404	0.39326	0.92561
0.22149	0.96221	0.25418	0.95386	0.39634	0.92534
0.2429	0.96217	0.26075	0.95381	0.39755	0.9252
0.24244	0.96199	0.25888	0.95363	0.39704	0.92497
0.23642	0.96195	0.27462	0.95354	0.3961	0.92483
0.24414	0.96177	0.25711	0.9535	0.3929	0.9247
0.22926	0.96168	0.26134	0.95327	0.39243	0.92447
0.22922	0.96155	0.27871	0.95318	0.39234	0.92433
0.24402	0.96147	0.27712	0.95305	0.39346	0.92406
0.22954	0.96138	0.26771	0.95296	0.39029	0.92392
0.24264	0.96125	0.272	0.95278	0.38832	0.92383
0.23588	0.96116	0.28399	0.95269	0.39436	0.9235
0.23285	0.96098	0.27475	0.95255	0.39702	0.92337
0.25359	0.96089	0.29251	0.95246	0.40196	0.92314
0.2349	0.96081	0.27437	0.95237	0.40317	0.923
0.23519	0.96063	0.27674	0.95224	0.40507	0.92282
0.25396	0.96059	0.29162	0.95215	0.41082	0.92259
0.2587	0.96041	0.27797	0.95206	0.41057	0.92245
0.24333	0.96032	0.27945	0.95188	0.41424	0.92217
0.24609	0.96015	0.28508	0.95183	0.41619	0.92208
0.25798	0.96006	0.28875	0.95161	0.41697	0.92194
0.24871	0.95997	0.27831	0.95152	0.42431	0.92162
0.24715	0.9598	0.29399	0.95138	0.42665	0.92149
0.24628	0.95975	0.27555	0.95129	0.4262	0.92126
0.26313	0.95967	0.29144	0.9512	0.42907	0.92112
0.26257	0.95949	0.2825	0.95098	0.43048	0.92089
0.24962	0.9594	0.27789	0.95093	0.43064	0.92075
0.25047	0.95923	0.2973	0.95084	0.42883	0.92061
0.26994	0.95914	0.28535	0.95062	0.43526	0.92034
0.25476	0.95905	0.29275	0.95053	0.43587	0.92025
0.25259	0.95892	0.28075	0.95039	0.43763	0.92011
0.27305	0.95883	0.28848	0.95026	0.43783	0.91983
0.27466	0.95866	0.29629	0.95017	0.43685	0.91974
0.25166	0.95857	0.3015	0.94999	0.43739	0.91947
0.27249	0.95848	0.28499	0.9499	0.43961	0.91928
0.27177	0.95826	0.28982	0.94972	0.44017	0.91906
0.26248	0.95822	0.30689	0.94963	0.43943	0.91892
0.25781	0.95804	0.28882	0.94949	0.43875	0.91878
0.27721	0.95791	0.29197	0.94936	0.44059	0.91855
0.27591	0.95778	0.30973	0.94922	0.44414	0.91841
0.2634	0.95769	0.29799	0.94913	0.44499	0.91809
0.26393	0.95765	0.30036	0.94895	0.44546	0.91795
0.26659	0.95752	0.31619	0.94886	0.44768	0.91786
0.28363	0.95739	0.32154	0.94868	0.44298	0.91759
0.2697	0.9573	0.30745	0.94859	0.44786	0.91745
0.27021	0.95717	0.30754	0.94846	0.45282	0.91717
0.2897	0.95708	0.31926	0.94832	0.45434	0.91704
0.29136	0.95686	0.3206	0.94819	0.45411	0.9169
0.27005	0.95677	0.32424	0.94801	0.45693	0.91667
0.27212	0.95664	0.31445	0.94792	0.45899	0.91653
0.29111	0.95651	0.32438	0.94783	0.45932	0.91621
0.27609	0.95642	0.33027	0.94765	0.46192	0.91612
0.27517	0.95629	0.31234	0.94751	0.46278	0.91598
0.2965	0.95616	0.31417	0.94738	0.46544	0.91571
0.27567	0.95607	0.33362	0.94724	0.46655	0.91557
0.28434	0.95589	0.30669	0.94715	0.46852	0.91529
0.29753	0.95581	0.31288	0.94697	0.46838	0.91516
0.29588	0.95563	0.32713	0.94688	0.46764	0.91502
0.2979	0.9555	0.33324	0.9467	0.47089	0.91479
0.28272	0.95541	0.31326	0.94661	0.47293	0.91461
0.28583	0.95524	0.32175	0.94648	0.47954	0.91433
0.30334	0.95515	0.32167	0.9463	0.48108	0.91419
0.302	0.95493	0.3399	0.94621	0.482	0.91406
0.28984	0.95489	0.34243	0.94598	0.48625	0.91378
0.30472	0.9548	0.32543	0.94589	0.48619	0.91369
0.30803	0.95458	0.32468	0.94571	0.48851	0.91341
0.2857	0.95449	0.34487	0.94562	0.49288	0.91323
0.28745	0.95432	0.33489	0.94549	0.51395	0.913
0.30309	0.95418	0.33501	0.94531	0.52964	0.91286
0.30816	0.95405	0.33255	0.94522	0.54494	0.91273
0.30975	0.95392	0.33487	0.94504	0.56203	0.91254
0.2946	0.95383	0.35013	0.94495	0.56659	0.91245
0.30274	0.95361	0.33581	0.94486	0.57254	0.91231
0.31849	0.95357	0.33433	0.94463	0.58122	0.91213
0.30618	0.95344	0.35332	0.94454	0.58172	0.91204
0.30467	0.95326	0.34797	0.94432	0.58311	0.91185
0.32212	0.95318	0.34963	0.94423	0.58213	0.91176
0.32499	0.953	0.34634	0.94414	0.58629	0.91158
0.32115	0.95287	0.33755	0.94396	0.58829	0.91149
0.32189	0.95269	0.35446	0.94382	0.59075	0.91139
0.30913	0.95261	0.35603	0.94364	0.59357	0.91121
0.32726	0.95252	0.33992	0.94355	0.59056	0.91112
0.32647	0.9523	0.34205	0.94342	0.59214	0.91103
0.31469	0.95225	0.34572	0.94324	0.58994	0.91084
0.32819	0.95212	0.36182	0.9431	0.5879	0.91075
0.31262	0.9519	0.35999	0.94292	0.58713	0.91052
0.32724	0.95182	0.34194	0.94283	0.58676	0.91043
0.33037	0.95164	0.35307	0.9427	0.58296	0.91025
0.31168	0.95151	0.34753	0.94247	0.58006	0.91016
0.32627	0.95142	0.36404	0.94243	0.5771	0.91002
0.328	0.95125	0.36683	0.9422	0.57576	0.90984
0.3225	0.95111	0.36352	0.94207	0.57555	0.90974
0.33177	0.9509	0.37	0.94189	0.57013	0.90961
0.31324	0.95081	0.35292	0.94175	0.56992	0.90942
0.33265	0.95072	0.36896	0.94166	0.56375	0.90928
0.3199	0.9505	0.36242	0.94144	0.5475	0.90906
0.33667	0.95041	0.36944	0.94135	0.53944	0.90896
0.3381	0.95019	0.37257	0.94112	0.53023	0.90869
0.32552	0.95011	0.35464	0.94104	0.53051	0.90855
0.33226	0.94997	0.36562	0.9409	0.5321	0.90846
0.32978	0.9498	0.3567	0.94068	0.5254	0.90814
0.34655	0.94971	0.37553	0.94058	0.52446	0.908
0.34635	0.94949	0.36417	0.94036	0.52562	0.90777
0.33041	0.9494	0.38071	0.94023	0.53003	0.90759
0.33946	0.94927	0.36108	0.94014	0.53954	0.90736
0.33318	0.94905	0.36685	0.93991	0.54661	0.90717
0.3472	0.94901	0.36262	0.93982	0.54929	0.90704
0.3497	0.94875	0.36222	0.9396	0.55855	0.90681
0.35057	0.94866	0.37831	0.93946	0.56413	0.90667
0.35267	0.94848	0.3802	0.93937	0.56978	0.90639
0.33917	0.94835	0.37739	0.9391	0.57228	0.9063
0.35741	0.94822	0.37126	0.93901	0.57187	0.90617
0.34804	0.94804	0.38654	0.93879	0.57554	0.90589
0.36226	0.94796	0.37958	0.93865	0.57215	0.90575
0.34594	0.94783	0.38722	0.93847	0.56932	0.90552
0.3623	0.94761	0.37034	0.93834	0.57572	0.90539
0.35214	0.94752	0.37754	0.9382	0.58498	0.90516
0.34824	0.9473	0.37597	0.93798	0.58874	0.90502
0.35705	0.94717	0.39652	0.93789	0.59124	0.90488
0.35014	0.94699	0.39704	0.93775	0.59508	0.90461
0.36378	0.94686	0.39918	0.93753	0.59441	0.90451
0.34907	0.94677	0.37946	0.93744	0.59401	0.90438
0.35992	0.94655	0.39957	0.93717	0.59094	0.9041
0.35761	0.94646	0.39471	0.93703	0.59191	0.90401
0.37336	0.94633	0.40697	0.93685	0.59182	0.90373
0.37623	0.94616	0.38935	0.93672	0.59571	0.9036
0.37223	0.94603	0.39717	0.93658	0.60037	0.90337
0.37865	0.94581	0.39279	0.93636	0.60359	0.90323
0.36152	0.94572	0.41454	0.93627	0.60073	0.90309
0.37951	0.94546	0.41084	0.93613	0.61008	0.90291
0.3615	0.94537	0.41777	0.93591	0.61665	0.90277
0.36785	0.94524	0.40042	0.93582	0.6179	0.90263
0.37129	0.94506	0.42158	0.93555	0.61496	0.90236
0.38356	0.94493	0.41066	0.93541	0.61494	0.90227
0.38528	0.94475	0.42543	0.93523	0.60778	0.90199
0.38694	0.94462	0.40643	0.9351	0.60181	0.90185
0.37208	0.94449	0.42187	0.93496	0.59768	0.90162
0.39176	0.94427	0.41326	0.93478	0.59353	0.90149
0.37576	0.94418	0.42791	0.93465	0.59262	0.90135
0.37449	0.94397	0.42538	0.93451	0.58668	0.90112
0.37567	0.94383	0.43126	0.93429	0.58287	0.90094
0.3949	0.9437	0.41824	0.9342	0.57129	0.90062
0.39829	0.94353	0.4365	0.93393	0.56642	0.90052
0.39492	0.9434	0.42683	0.93379	0.5648	0.90034
0.38084	0.94326	0.41878	0.9337	0.56941	0.90002
0.38602	0.94304	0.42325	0.93348	0.56624	0.89988
0.38137	0.94296	0.42827	0.93334	0.57075	0.89956
0.39829	0.94269	0.42214	0.93316	0.57332	0.89938
0.40084	0.94261	0.44363	0.93303	0.57394	0.89924
0.38924	0.94239	0.43797	0.93289	0.57759	0.89887
0.39451	0.94225	0.44068	0.93262	0.58094	0.89869
0.40169	0.94217	0.42896	0.93258	0.58596	0.89841
0.40717	0.94195	0.44846	0.93231	0.58861	0.89823
0.40795	0.94182	0.44964	0.93217	0.59389	0.89795
0.41247	0.9416	0.45264	0.93195	0.59982	0.89777
0.40364	0.94146	0.44339	0.93181	0.60445	0.89763
0.39623	0.94133	0.44401	0.93172	0.60228	0.89731
0.39942	0.94116	0.44452	0.9315	0.598	0.89717
0.40082	0.94103	0.45859	0.93136	0.60279	0.89685
0.40773	0.94076	0.47087	0.93127	0.6022	0.89672
0.40138	0.94068	0.47145	0.93105	0.60292	0.89653
0.4196	0.94059	0.45915	0.93091	0.60158	0.89621
0.41199	0.94033	0.48024	0.93069	0.60405	0.89603
0.42365	0.94019	0.47469	0.93055	0.6108	0.89575
0.42592	0.94002	0.48042	0.93037	0.61383	0.89557
0.42223	0.93989	0.46541	0.93024	0.61852	0.89529
0.40942	0.93975	0.47368	0.9301	0.61799	0.89511
0.41626	0.93954	0.46903	0.92992	0.61841	0.89497
0.41412	0.9394	0.48968	0.92979	0.6221	0.89461
0.43071	0.93918	0.47273	0.92965	0.62338	0.89451
0.41716	0.9391	0.48601	0.92947	0.62583	0.89433
0.43198	0.93883	0.47273	0.92934	0.63004	0.89401
0.41645	0.9387	0.48684	0.92911	0.63141	0.89392
0.43406	0.93861	0.4745	0.92902	0.63996	0.89355
0.4238	0.93835	0.4746	0.9288	0.64395	0.89341
0.43994	0.93826	0.47592	0.92866	0.64957	0.89314
0.423	0.93804	0.4948	0.92853	0.65392	0.893
0.43978	0.93791	0.49265	0.9283	0.65332	0.89282
0.43794	0.93778	0.49534	0.92821	0.65461	0.89259
0.44125	0.93756	0.50227	0.92799	0.65583	0.8924
0.43634	0.93743	0.48865	0.92785	0.65825	0.89213
0.43947	0.93717	0.48758	0.92776	0.66353	0.89194
0.43409	0.93708	0.48871	0.92754	0.66724	0.89185
0.43164	0.93695	0.5067	0.9274	0.67341	0.89153
0.44636	0.93668	0.49366	0.92718	0.66925	0.89139
0.4374	0.93655	0.50661	0.92704	0.66989	0.89117
0.45033	0.93633	0.49748	0.927	0.66757	0.89098
0.44086	0.9362	0.51318	0.92673	0.6642	0.89084
0.45601	0.93598	0.5014	0.9266	0.6613	0.89057
0.44528	0.93585	0.51627	0.92642	0.66403	0.89043
0.44146	0.93572	0.50185	0.92628	0.66586	0.89011
0.44414	0.9355	0.51293	0.92614	0.66483	0.89002
0.44539	0.93537	0.50113	0.92597	0.66385	0.88984
0.45232	0.93524	0.52205	0.92583	0.66312	0.88951
0.44575	0.93502	0.50155	0.92561	0.67019	0.88938
0.46012	0.93489	0.5191	0.92552	0.66929	0.8891
0.455	0.93462	0.50564	0.92538	0.66818	0.88892
0.44868	0.93449	0.52363	0.92516	0.66617	0.88878
0.45932	0.93427	0.50775	0.92502	0.67361	0.8885
0.4521	0.93414	0.51459	0.9248	0.67859	0.88832
0.45997	0.93401	0.51144	0.92471	0.68298	0.888
0.4542	0.93379	0.52955	0.92457	0.68553	0.88791
0.45592	0.93366	0.51448	0.92435	0.68428	0.88772
0.47405	0.93335	0.53288	0.92421	0.6861	0.8874
0.45974	0.93326	0.51918	0.92399	0.68781	0.88731
0.47224	0.93313	0.53501	0.9239	0.68929	0.88699
0.46828	0.93287	0.52994	0.92363	0.68624	0.88681
0.46672	0.93278	0.53901	0.92349	0.68777	0.88653
0.47725	0.93252	0.51985	0.9234	0.68939	0.88639
0.46696	0.93234	0.53361	0.92318	0.69199	0.88621
0.46347	0.93221	0.52532	0.92304	0.69529	0.88594
0.47536	0.93199	0.53069	0.92286	0.69454	0.8858
0.46598	0.93186	0.53391	0.92273	0.69094	0.88562
0.47876	0.93155	0.54732	0.92259	0.69572	0.88529
0.46802	0.93147	0.53445	0.92237	0.69372	0.8852
0.47077	0.93133	0.55367	0.92228	0.68975	0.88484
0.48547	0.93107	0.54186	0.92201	0.69194	0.8847
0.47047	0.93098	0.55694	0.92187	0.69769	0.88442
0.47997	0.93068	0.54132	0.92183	0.70239	0.88424
0.49045	0.93054	0.55308	0.92156	0.7002	0.88406
0.49142	0.93037	0.53936	0.92142	0.69837	0.88378
0.48619	0.93015	0.54418	0.92124	0.70038	0.8836
0.49488	0.93002	0.5491	0.92111	0.70441	0.88346
0.47799	0.92975	0.5648	0.92097	0.70731	0.88318
0.48704	0.92962	0.56022	0.92075	0.70696	0.883
0.49669	0.92949	0.56494	0.92066	0.71335	0.88268
0.48678	0.92918	0.55411	0.92039	0.71299	0.8825
0.49272	0.9291	0.56929	0.92025	0.71778	0.88222
0.49784	0.92879	0.55192	0.92016	0.72106	0.88204
0.48947	0.92866	0.56857	0.91994	0.72029	0.8819
0.48462	0.92853	0.55586	0.9198	0.72199	0.88162
0.50177	0.92826	0.56722	0.91967	0.72332	0.88144
0.50125	0.92813	0.56146	0.91949	0.72301	0.88126
0.49325	0.92782	0.57882	0.91935	0.72051	0.88098
0.50719	0.92769	0.56499	0.91908	0.72146	0.88084
0.51182	0.92756	0.57917	0.91895	0.72052	0.88048
0.50479	0.92725	0.57256	0.91886	0.72138	0.88039
0.50042	0.92712	0.59308	0.91863	0.72441	0.88002
0.51844	0.92686	0.58938	0.9185	0.72047	0.87984
0.51472	0.92673	0.5926	0.91827	0.71564	0.8797
0.50881	0.92655	0.57623	0.91818	0.72168	0.87938
0.52531	0.92633	0.58222	0.91805	0.72594	0.87919
0.52591	0.92616	0.58191	0.91782	0.73157	0.87906
0.50989	0.9259	0.60301	0.91773	0.7432	0.87873
0.5293	0.92581	0.58346	0.91746	0.74708	0.8786
0.5309	0.92563	0.6026	0.91733	0.75111	0.87823
0.51574	0.92537	0.58799	0.91728	0.75362	0.87809
0.52976	0.92524	0.61087	0.91701	0.76158	0.87782
0.53751	0.92497	0.59293	0.91692	0.76299	0.87763
0.53062	0.9248	0.60985	0.9167	0.76166	0.8775
0.53402	0.92471	0.59971	0.91656	0.7647	0.87722
0.54212	0.9244	0.59917	0.91638	0.76591	0.87708
0.53863	0.92427	0.60896	0.91625	0.76764	0.8769
0.55372	0.92405	0.62104	0.91616	0.77008	0.87658
0.55271	0.92392	0.62098	0.91593	0.77173	0.87649
0.54754	0.92375	0.60718	0.9158	0.77597	0.87617
0.55862	0.92353	0.62675	0.91557	0.77946	0.87603
0.55401	0.9234	0.61508	0.91544	0.77955	0.87584
0.54972	0.92313	0.63222	0.91539	0.77817	0.87562
0.56443	0.92296	0.61503	0.91512	0.77753	0.87543
0.55494	0.92274	0.63052	0.91503	0.78126	0.87511
0.56273	0.92261	0.61885	0.91481	0.78367	0.87502
0.56756	0.92247	0.63536	0.91467	0.78596	0.87488
0.55363	0.92225	0.61898	0.91458	0.78876	0.87456
0.56981	0.92212	0.63271	0.91436	0.78943	0.87447
0.56699	0.92195	0.62112	0.91427	0.79699	0.87415
0.5655	0.92173	0.63527	0.914	0.7995	0.87396
0.5739	0.9216	0.62578	0.91386	0.80317	0.87373
0.56058	0.92129	0.64484	0.91382	0.80496	0.87355
0.56304	0.9212	0.63683	0.91355	0.8059	0.87341
0.57124	0.92094	0.64317	0.91346	0.80975	0.87318
0.56033	0.92076	0.64322	0.91323	0.81293	0.873
0.55907	0.92063	0.6358	0.9131	0.81329	0.87286
0.56925	0.92041	0.64918	0.91292	0.81278	0.87259
0.56766	0.92024	0.63307	0.91279	0.81645	0.8725
0.56006	0.92011	0.64297	0.91265	0.822	0.87217
0.57811	0.91984	0.63606	0.91243	0.82634	0.87204
0.57321	0.91971	0.65368	0.91234	0.83372	0.87181
0.56373	0.9194	0.64214	0.9122	0.83439	0.87162
0.5812	0.91932	0.66045	0.91198	0.83972	0.87149
0.57118	0.91901	0.64604	0.91188	0.84724	0.87126
0.56923	0.91888	0.66301	0.91166	0.85009	0.87112
0.57831	0.91875	0.64429	0.91153	0.85443	0.87098
0.57628	0.91848	0.6531	0.91135	0.85753	0.87075
0.57348	0.91835	0.65512	0.91121	0.8619	0.87061
0.58943	0.91809	0.67264	0.91108	0.86597	0.87039
0.58423	0.91796	0.65364	0.91085	0.86502	0.87025
0.57763	0.91783	0.67186	0.91076	0.8628	0.87002
0.58488	0.91752	0.6586	0.91063	0.86606	0.86988
0.58978	0.91743	0.68115	0.9104	0.87232	0.86974
0.58335	0.91712	0.67071	0.91031	0.8793	0.86956
0.58593	0.91695	0.66679	0.91009	0.88239	0.86942
0.59479	0.91682	0.68674	0.91	0.88211	0.86915
0.59095	0.91655	0.68079	0.90977	0.88104	0.86906
0.5894	0.91642	0.69014	0.90968	0.88543	0.86896
0.59595	0.91629	0.69532	0.90946	0.89599	0.86869
0.60012	0.91603	0.67766	0.90937	0.89857	0.8686
0.59448	0.91589	0.68617	0.90923	0.89996	0.86837
0.60825	0.91559	0.67922	0.90901	0.9018	0.86823
0.61685	0.91546	0.70124	0.90892	0.89831	0.86814
0.60311	0.91519	0.68861	0.90869	0.90108	0.86791
0.61597	0.91506	0.69854	0.9086	0.9005	0.86782
0.62819	0.91493	0.68209	0.90847	0.90518	0.86759
0.61016	0.91467	0.68604	0.90824	0.90427	0.8675
0.61957	0.91454	0.68711	0.90815	0.90311	0.86736
0.63453	0.9144	0.69488	0.90788	0.90502	0.86708
0.61808	0.91414	0.71211	0.90784	0.90735	0.86704
0.62957	0.91401	0.6973	0.90761	0.90059	0.86676
0.63489	0.91375	0.7113	0.90748	0.90511	0.86662
0.61981	0.91361	0.71769	0.9073	0.90252	0.86653
0.64057	0.91335	0.71353	0.90716	0.90101	0.8663
0.64183	0.91322	0.70643	0.90707	0.8971	0.86617
0.63323	0.91304	0.70262	0.90689	0.90113	0.86594
0.6512	0.91282	0.72199	0.90676	0.90399	0.8658
0.64593	0.91269	0.70544	0.90653	0.90385	0.86566
0.64678	0.91243	0.72297	0.9064	0.89482	0.86548
0.65273	0.9123	0.71201	0.90635	0.89271	0.86534
0.64906	0.91217	0.72297	0.90608	0.89671	0.86506
0.64416	0.9119	0.71408	0.90599	0.90336	0.86493
0.65894	0.91182	0.71397	0.90581	0.90968	0.86465
0.64464	0.91151	0.73201	0.90568	0.9069	0.86451
0.65424	0.91138	0.72024	0.90545	0.90693	0.86438
0.66264	0.91129	0.72808	0.90536	0.90532	0.86419
0.65501	0.91103	0.73873	0.90514	0.90817	0.86406
0.66942	0.91085	0.72496	0.90505	0.91257	0.86387
0.6586	0.91063	0.74078	0.90496	0.91854	0.86364
0.66869	0.9105	0.73171	0.90473	0.9198	0.86351
0.67799	0.91037	0.75106	0.90464	0.92511	0.86328
0.66975	0.91015	0.75022	0.90442	0.9302	0.86314
0.68255	0.91002	0.72999	0.90433	0.93118	0.86305
0.67124	0.90971	0.74797	0.9041	0.94041	0.86277
0.66798	0.90958	0.73062	0.90401	0.9327	0.86263
0.68569	0.90949	0.73166	0.90379	0.9311	0.86236
0.67407	0.90923	0.7486	0.9037	0.93167	0.86227
0.67669	0.9091	0.74171	0.90347	0.93268	0.86217
0.67325	0.90888	0.75603	0.90338	0.93526	0.8619
0.67745	0.90875	0.74014	0.90325	0.93799	0.86176
0.69078	0.90861	0.75382	0.90302	0.93941	0.86153
0.67946	0.90835	0.74248	0.90293	0.93615	0.86139
0.69101	0.90822	0.75592	0.9028	0.93712	0.86126
0.68541	0.90796	0.73946	0.90257	0.93772	0.86103
0.68924	0.90787	0.75406	0.90244	0.94515	0.86089
0.70167	0.90774	0.76068	0.90226	0.94813	0.86061
0.68474	0.90747	0.76587	0.90212	0.94859	0.86052
0.68395	0.9073	0.74964	0.90199	0.94389	0.86039
0.69153	0.90708	0.76873	0.90176	0.93699	0.86011
0.68707	0.90695	0.75764	0.90167	0.93687	0.86002
0.70494	0.90673	0.7681	0.90158	0.94121	0.85974
0.69185	0.90655	0.76001	0.90131	0.94957	0.85961
0.69515	0.90642	0.77366	0.90118	0.9552	0.85947
0.70928	0.90616	0.77606	0.901	0.96	0.85924
0.69757	0.90607	0.75968	0.90086	0.96527	0.8591
0.71933	0.90581	0.75825	0.90077	0.96885	0.85887
0.71662	0.90563	0.75907	0.90055	0.9718	0.85873
0.70499	0.9055	0.77512	0.90041	0.97459	0.8586
0.72064	0.90528	0.75795	0.90019	0.98043	0.85837
0.71273	0.90515	0.7694	0.90005	0.97981	0.85828
0.70378	0.90502	0.75893	0.90001	0.98433	0.858
0.72014	0.9048	0.78269	0.89974	0.98499	0.85791
0.71277	0.90462	0.77619	0.8996	0.98786	0.85782
0.72563	0.90436	0.78501	0.89942	0.98782	0.85754
0.73526	0.90423	0.768	0.89929	0.9898	0.8574
0.71751	0.90414	0.7775	0.89915	0.98961	0.85722
0.7395	0.90388	0.76949	0.89897	0.99474	0.85708
0.73526	0.90375	0.78504	0.89884	0.99355	0.85695
0.74019	0.90353	0.77159	0.89857	0.99668	0.85676
0.7442	0.90335	0.78913	0.89848	0.99577	0.85662
0.73335	0.90322	0.77223	0.89839	0.99493	0.85635
0.73821	0.90296	0.78882	0.89812	0.99386	0.85626
0.73606	0.90287	0.78313	0.89798	0.99507	0.85603
0.73709	0.90261	0.79482	0.89781	0.99591	0.85589
0.75064	0.90247	0.77447	0.89767	1.00015	0.85575
0.7329	0.90239	0.77959	0.89753	1.00182	0.85552
0.75229	0.90212	0.7792	0.89727	1.00318	0.85543
0.74877	0.90195	0.79373	0.89718	1.00307	0.85529
0.74031	0.90173	0.78039	0.89695	1.00436	0.85506
0.74751	0.9016	0.78386	0.89682	1.00502	0.85493
0.74188	0.90147	0.79865	0.89668	1.00606	0.85465
0.74925	0.90125	0.79005	0.89646	1.00746	0.85456
0.7522	0.90107	0.7971	0.89632	1.01377	0.85433
0.73754	0.90081	0.78627	0.89619	1.01296	0.85419
0.74633	0.90068	0.80247	0.89596	1.01251	0.85406
0.75653	0.90059	0.78108	0.89587	1.01219	0.85383
0.74506	0.90028	0.80278	0.8956	1.01482	0.85369
0.75958	0.90015	0.80437	0.89547	1.02261	0.85351
0.75116	0.89993	0.79383	0.89538	1.02513	0.85337
0.75414	0.8998	0.80009	0.89511	1.0291	0.85323
0.7657	0.89962	0.78899	0.89497	1.03155	0.85295
0.75587	0.8994	0.79817	0.89475	1.03334	0.85286
0.76378	0.89927	0.79473	0.89461	1.03131	0.85263
0.76927	0.89901	0.80609	0.89448	1.03597	0.8525
0.75908	0.89888	0.80023	0.89425	1.03609	0.8524
0.77258	0.89875	0.8114	0.89412	1.04246	0.85217
0.76554	0.89848	0.8042	0.89385	1.04219	0.85204
0.76335	0.89835	0.80782	0.89371	1.04848	0.85181
0.7805	0.89813	0.80782	0.89353	1.05108	0.85172
0.77241	0.89796	0.81297	0.8934	1.05317	0.85158
0.78729	0.89774	0.8258	0.89326	1.05414	0.85135
0.78001	0.89761	0.81669	0.89304	1.05637	0.85126
0.77128	0.89747	0.83082	0.8929	1.05482	0.85098
0.79026	0.89721	0.82254	0.89268	1.04874	0.85084
0.77657	0.89708	0.82943	0.89254	1.04447	0.8508
0.77814	0.89695	0.82132	0.89241	1.04794	0.85052
0.79299	0.89668	0.83564	0.89218	1.05183	0.85039
0.78318	0.89655	0.82873	0.89205	1.05464	0.85016
0.79566	0.89633	0.83959	0.89178	1.03819	0.85006
0.79752	0.89616	0.83977	0.89164	1.04532	0.84993
0.79458	0.89603	0.8225	0.8916	1.05332	0.8497
0.79513	0.89576	0.83873	0.89128	1.06082	0.84956
0.80148	0.89568	0.82383	0.89119	1.06623	0.84928
0.79315	0.89537	0.84284	0.89097	1.07204	0.84919
0.8029	0.89524	0.82921	0.89083	1.07498	0.8491
0.81238	0.89511	0.84736	0.89061	1.08211	0.84883
0.8058	0.89489	0.83185	0.89047	1.08524	0.84873
0.81556	0.89475	0.83308	0.89034	1.08939	0.84851
0.81444	0.89462	0.82989	0.89011	1.08878	0.84841
0.81492	0.89436	0.83256	0.88998	1.09341	0.84818
0.82083	0.89423	0.8506	0.88971	1.09641	0.84809
0.80827	0.89396	0.83583	0.88962	1.09583	0.84795
0.82409	0.89388	0.85896	0.88948	1.10022	0.84773
0.81058	0.89361	0.84034	0.88921	1.09894	0.84763
0.81135	0.89348	0.8407	0.88908	1.10231	0.8475
0.82855	0.89335	0.84706	0.88881	1.10408	0.84727
0.81398	0.89309	0.84898	0.88867	1.10851	0.84722
0.82735	0.89296	0.84726	0.88845	1.11056	0.84695
0.81615	0.89274	0.84236	0.88831	1.1127	0.84685
0.82995	0.89261	0.85789	0.88818	1.11669	0.84667
0.83196	0.89247	0.84818	0.88795	1.11837	0.84653
0.82172	0.89221	0.86422	0.88782	1.12254	0.84644
0.84103	0.89208	0.86008	0.88755	1.1259	0.84626
0.83183	0.89182	0.85871	0.88746	1.12763	0.84612
0.82283	0.89168	0.86871	0.88732	1.12847	0.84603
0.83938	0.8916	0.85062	0.88705	1.13148	0.8458
0.82293	0.89133	0.87478	0.88696	1.13362	0.84571
0.83016	0.8912	0.85823	0.88665	1.13213	0.84548
0.83899	0.89094	0.85559	0.88651	1.13535	0.84539
0.83281	0.89081	0.87559	0.88642	1.13544	0.8452
0.84569	0.89068	0.86195	0.88615	1.13338	0.84506
0.83573	0.89046	0.8671	0.88602	1.13913	0.84497
0.83903	0.89032	0.86338	0.88579	1.13828	0.84479
0.85534	0.89002	0.86578	0.88566	1.13761	0.84465
0.84364	0.88989	0.88436	0.88548	1.13992	0.84442
0.84884	0.8898	0.87121	0.88525	1.13687	0.84438
0.85324	0.88954	0.88329	0.88512	1.13757	0.84424
0.8409	0.8894	0.88376	0.88485	1.12791	0.84401
0.86178	0.88918	0.88502	0.88476	1.1299	0.84387
0.85471	0.88901	0.89408	0.88449	1.12978	0.84369
0.86787	0.88879	0.87997	0.88436	1.1327	0.84355
0.85774	0.88866	0.87801	0.88422	1.13321	0.84346
0.85564	0.88853	0.88368	0.88395	1.14082	0.84323
0.87113	0.88826	0.88461	0.88381	1.14749	0.84314
0.85911	0.88818	0.89408	0.88359	1.14455	0.84286
0.87236	0.88787	0.88637	0.88346	1.15166	0.84282
0.88418	0.88774	0.88981	0.88332	1.15349	0.84268
0.87782	0.88761	0.88587	0.8831	1.1628	0.84245
0.88812	0.88739	0.89417	0.88296	1.16206	0.84231
0.88574	0.88725	0.91173	0.88265	1.16257	0.84213
0.8759	0.88712	0.90439	0.88251	1.16387	0.84204
0.89146	0.8869	0.90789	0.88242	1.16549	0.8419
0.87983	0.88677	0.9048	0.88215	1.16848	0.84172
0.89427	0.88651	0.90073	0.88202	1.16827	0.84162
0.87778	0.88642	0.92225	0.88179	1.17409	0.84149
0.88476	0.88629	0.90577	0.88166	1.17526	0.84126
0.89491	0.88603	0.92618	0.88143	1.17973	0.84117
0.88467	0.88589	0.91432	0.8813	1.18251	0.84094
0.90622	0.88568	0.91934	0.88116	1.18139	0.84084
0.88991	0.88554	0.93911	0.88089	1.18361	0.84066
0.91082	0.88532	0.92166	0.8808	1.18358	0.84052
0.89432	0.88519	0.93893	0.88067	1.18498	0.84043
0.89482	0.88506	0.92841	0.8804	1.18893	0.8402
0.90927	0.8848	0.94549	0.88031	1.18676	0.84011
0.90229	0.88471	0.93257	0.88004	1.19132	0.84002
0.91364	0.88445	0.93656	0.8799	1.19443	0.83979
0.8979	0.88432	0.93283	0.87968	1.19563	0.8397
0.91711	0.88423	0.94437	0.87954	1.19924	0.83947
0.90479	0.88397	0.9578	0.87941	1.19746	0.83938
0.90623	0.88383	0.9511	0.87918	1.19655	0.83919
0.91046	0.88361	0.96101	0.87905	1.19727	0.83906
0.91336	0.88348	0.94945	0.87882	1.19777	0.83896
0.90876	0.88326	0.96938	0.87873	1.1982	0.83878
0.91086	0.88313	0.95828	0.8786	1.19698	0.83864
0.92875	0.883	0.97689	0.87833	1.19994	0.83841
0.91681	0.88278	0.96164	0.87824	1.19629	0.83832
0.93321	0.88265	0.98204	0.87801	1.19889	0.83823
0.93285	0.88247	0.97136	0.87788	1.20307	0.838
0.92085	0.88225	0.97883	0.87774	1.20386	0.83786
0.93598	0.88212	0.97417	0.87756	1.21101	0.83768
0.92073	0.8819	0.98938	0.87743	1.21032	0.83759
0.93751	0.88173	0.9874	0.8772	1.21516	0.83745
0.92674	0.88151	0.99657	0.87711	1.21854	0.83727
0.94024	0.88138	0.9825	0.87698	1.21782	0.83713
0.9398	0.88125	0.99874	0.87671	1.2209	0.8369
0.94068	0.88103	0.98571	0.87666	1.22076	0.83685
0.94924	0.8809	0.99716	0.87639	1.22783	0.83672
0.93782	0.88076	0.99246	0.8763	1.23042	0.83649
0.95289	0.88054	0.99427	0.87608	1.23279	0.83639
0.94798	0.88041	1.00136	0.87594	1.23492	0.83621
0.95152	0.88015	1.00634	0.87585	1.23418	0.83607
0.94807	0.88006	1.00051	0.87563	1.23975	0.83598
0.95811	0.8798	0.99039	0.87549	1.24228	0.8358
0.96484	0.87967	0.98941	0.8754	1.2394	0.83566
0.95745	0.87954	0.98531	0.87518	1.24009	0.83548
0.96911	0.87932	0.99039	0.87504	1.2392	0.83539
0.95261	0.87923	0.9908	0.87477	1.24144	0.83529
0.97356	0.87901	0.99645	0.87468	1.24396	0.83506
0.95583	0.87888	0.9893	0.87446	1.24227	0.83497
0.95982	0.87875	1.00056	0.87432	1.24641	0.83474
0.95883	0.87853	1.0135	0.87423	1.24492	0.83465
0.95973	0.8784	1.01413	0.87396	1.25064	0.83451
0.9744	0.87813	1.01833	0.87383	1.2521	0.83433
0.9683	0.87804	1.01941	0.87365	1.25166	0.83424
0.97735	0.87778	1.01259	0.87351	1.25349	0.83406
0.97006	0.87765	0.99801	0.87338	1.25531	0.83392
0.98302	0.87752	1.01116	0.87315	1.25968	0.83383
0.97302	0.87734	1.00392	0.87306	1.26454	0.8336
0.99026	0.87721	1.02597	0.87279	1.26373	0.8335
0.9814	0.87699	1.00836	0.87266	1.27124	0.83328
0.99437	0.87686	1.02792	0.87257	1.27256	0.83318
0.9866	0.87673	1.00285	0.8723	1.27694	0.833
0.99723	0.87646	1.0175	0.87216	1.28349	0.83291
0.98299	0.87642	1.01541	0.87198	1.28404	0.83277
1.00322	0.87616	1.03605	0.87185	1.2893	0.83259
0.99777	0.87603	1.02338	0.87162	1.29487	0.8325
1.00488	0.87581	1.04275	0.87149	1.29357	0.8324
0.99416	0.87568	1.03748	0.87135	1.29631	0.83222
0.98999	0.87554	1.04352	0.87108	1.2987	0.83213
1.00739	0.87528	1.03176	0.87104	1.30124	0.83194
0.98991	0.87524	1.05489	0.87077	1.30335	0.83181
1.00546	0.87497	1.0401	0.87063	1.30676	0.83167
0.98882	0.87484	1.0489	0.87054	1.30949	0.83153
1.00627	0.87462	1.04376	0.87032	1.30801	0.83144
0.99255	0.87449	1.0534	0.87018	1.3091	0.8313
0.99222	0.87436	1.04775	0.87001	1.31025	0.83117
0.99086	0.87414	1.06518	0.86987	1.31204	0.83107
0.99389	0.87401	1.0582	0.86974	1.31117	0.83089
1.01042	0.87388	1.06917	0.86955	1.30972	0.8308
0.9938	0.87361	1.05915	0.86942	1.31228	0.83061
1.00876	0.87348	1.07395	0.86919	1.31446	0.83052
1.00429	0.87322	1.06004	0.8691	1.31442	0.83034
1.00735	0.87313	1.05545	0.86888	1.31369	0.8302
1.00569	0.87287	1.06448	0.86875	1.31707	0.83011
1.00064	0.87274	1.06735	0.86866	1.3194	0.82993
1.02059	0.87265	1.0851	0.86843	1.3191	0.82984
1.00981	0.87239	1.08418	0.8683	1.32171	0.82965
1.01038	0.87225	1.08978	0.86812	1.32506	0.82956
1.01155	0.87204	1.07498	0.86798	1.32575	0.82947
1.011	0.8719	1.09511	0.86789	1.33348	0.82924
1.02689	0.87173	1.08445	0.86767	1.33702	0.82919
1.02248	0.87147	1.09662	0.86753	1.34129	0.82901
1.02917	0.87138	1.09304	0.86731	1.34457	0.82887
1.0246	0.87111	1.08186	0.86726	1.34418	0.82883
1.02102	0.87098	1.1015	0.86699	1.34423	0.82864
1.0348	0.87085	1.08883	0.8669	1.34266	0.8285
1.02553	0.87063	1.09145	0.86672	1.34371	0.82837
1.03565	0.8705	1.09482	0.86659	1.34823	0.82828
1.04663	0.87037	1.10836	0.8665	1.34922	0.82814
1.03943	0.87015	1.1107	0.86627	1.34976	0.828
1.05302	0.87002	1.09414	0.86618	1.35293	0.82791
1.03628	0.86975	1.11871	0.86596	1.35846	0.82768
1.0519	0.86967	1.11282	0.86587	1.3595	0.82759
1.03732	0.8694	1.10251	0.86564	1.36071	0.82754
1.0451	0.86927	1.11353	0.86555	1.35336	0.82731
1.05904	0.86914	1.11771	0.86537	1.35343	0.82722
1.05037	0.86892	1.11209	0.86524	1.35748	0.82704
1.06254	0.86879	1.12059	0.86501	1.36152	0.82694
1.05376	0.86857	1.10111	0.86492	1.36419	0.82685
1.06727	0.86844	1.12008	0.8647	1.36696	0.82667
1.06332	0.86831	1.10904	0.86461	1.36429	0.82658
1.07079	0.86809	1.12387	0.86452	1.36689	0.82639
1.06818	0.86796	1.12208	0.86425	1.36991	0.8263
1.06333	0.86769	1.12716	0.86416	1.37162	0.82612
1.0631	0.86761	1.12811	0.86393	1.37411	0.82603
1.05894	0.86752	1.11274	0.86384	1.37762	0.82589
1.07194	0.86721	1.12918	0.86362	1.38303	0.82575
1.06456	0.86708	1.1253	0.86353	1.3838	0.82566
1.07862	0.86686	1.14171	0.86339	1.38062	0.82548
1.08266	0.86673	1.14487	0.86321	1.38422	0.82539
1.08704	0.86651	1.13296	0.86308	1.38334	0.82529
1.08321	0.86638	1.14875	0.86285	1.38804	0.82506
1.07086	0.86625	1.13613	0.86276	1.39264	0.82502
1.08526	0.86603	1.14769	0.86254	1.3982	0.82484
1.0712	0.8659	1.14555	0.86245	1.39613	0.82474
1.09165	0.86563	1.14518	0.86227	1.39775	0.82465
1.07586	0.86554	1.1571	0.86218	1.40206	0.82447
1.07931	0.86541	1.1429	0.86204	1.40293	0.82438
1.09267	0.86515	1.16794	0.86182	1.4089	0.82419
1.08399	0.86502	1.16817	0.86173	1.41097	0.8241
1.09481	0.8648	1.15524	0.86155	1.41273	0.82401
1.08437	0.86467	1.16954	0.86141	1.41265	0.82383
1.10546	0.86445	1.17191	0.86123	1.41569	0.82373
1.08766	0.86432	1.15631	0.86114	1.41962	0.82355
1.08997	0.86418	1.17791	0.86092	1.41922	0.82346
1.10624	0.86392	1.17289	0.86083	1.41841	0.82341
1.09357	0.86383	1.15995	0.86065	1.41769	0.82323
1.10661	0.8637	1.17884	0.86051	1.41713	0.82314
1.09118	0.86344	1.18307	0.86033	1.41813	0.82295
1.11007	0.86335	1.16722	0.86024	1.41625	0.82286
1.09775	0.86309	1.18924	0.86015	1.42338	0.82277
1.10077	0.86296	1.18679	0.85997	1.4261	0.82259
1.0998	0.86274	1.18726	0.85984	1.42366	0.8225
1.10387	0.86261	1.18554	0.85961	1.43176	0.82231
1.12039	0.86247	1.16866	0.85952	1.43423	0.82227
1.1124	0.86225	1.1798	0.8593	1.4325	0.82217
1.13008	0.86212	1.17166	0.85921	1.43538	0.82194
1.11205	0.86186	1.17475	0.85903	1.43898	0.82185
1.13149	0.86177	1.19153	0.85889	1.44052	0.82172
1.12726	0.86164	1.1749	0.8588	1.43847	0.82162
1.12938	0.86138	1.19367	0.85858	1.44013	0.82144
1.12668	0.86129	1.17634	0.85849	1.44237	0.82135
1.13243	0.86103	1.18991	0.85835	1.44354	0.82126
1.13828	0.86089	1.17761	0.85813	1.44791	0.82107
1.1402	0.86068	1.17943	0.85804	1.45205	0.82103
1.14309	0.86059	1.20266	0.85781	1.45283	0.82094
1.12548	0.86046	1.18559	0.85772	1.45358	0.82071
1.14687	0.86024	1.18967	0.85754	1.45395	0.82066
1.13164	0.86011	1.19279	0.85741	1.45466	0.82048
1.13504	0.85997	1.18986	0.85718	1.45827	0.82039
1.13146	0.85975	1.21033	0.85714	1.45766	0.8202
1.14397	0.85962	1.20916	0.85687	1.45262	0.82011
1.14487	0.85936	1.21005	0.85678	1.45054	0.82002
1.143	0.85923	1.20925	0.8566	1.44828	0.81988
1.1476	0.85901	1.18975	0.85646	1.44527	0.81979
1.14662	0.85892	1.20181	0.85633	1.44833	0.81965
1.16244	0.85879	1.19679	0.85615	1.45097	0.81947
1.14972	0.85857	1.21025	0.85601	1.44983	0.81942
1.1676	0.85844	1.18808	0.85592	1.45554	0.81919
1.15927	0.85822	1.20103	0.8557	1.45706	0.8191
1.16858	0.85809	1.19127	0.85556	1.4601	0.81892
1.15549	0.85796	1.21146	0.85534	1.46129	0.81883
1.17519	0.85774	1.19903	0.85525	1.46327	0.81873
1.16168	0.85765	1.19693	0.85498	1.46564	0.8185
1.18548	0.85739	1.19925	0.85489	1.46775	0.81846
1.16729	0.85725	1.21455	0.8548	1.47417	0.81837
1.18092	0.85708	1.20843	0.85453	1.47946	0.81814
1.17315	0.85695	1.22061	0.8544	1.48279	0.81805
1.18598	0.85682	1.22186	0.85422	1.48373	0.81791
1.17912	0.85664	1.21595	0.85408	1.48674	0.81782
1.19314	0.85651	1.20089	0.85395	1.48828	0.81773
1.18374	0.85625	1.20966	0.85372	1.48656	0.81754
1.19891	0.8562	1.21113	0.85363	1.48776	0.81745
1.19805	0.85594	1.22831	0.85336	1.49112	0.81727
1.19976	0.85585	1.2128	0.85323	1.4891	0.81717
1.20418	0.85563	1.22922	0.85314	1.48941	0.81708
1.18567	0.85554	1.21757	0.85291	1.48946	0.8169
1.20637	0.85528	1.23754	0.85278	1.49211	0.81681
1.18679	0.85519	1.23986	0.85255	1.49731	0.81662
1.20642	0.85506	1.24743	0.85246	1.49918	0.81653
1.19628	0.85484	1.23233	0.85233	1.49746	0.81644
1.21391	0.85475	1.25238	0.8521	1.50118	0.81626
1.20103	0.85454	1.23834	0.85201	1.50367	0.81617
1.21519	0.8544	1.24392	0.85174	1.50615	0.81598
1.21785	0.85423	1.24159	0.85165	1.50679	0.81594
1.21599	0.8541	1.25836	0.85152	1.50931	0.81584
1.20366	0.85397	1.25666	0.85134	1.51369	0.81561
1.20651	0.85375	1.25461	0.8512	1.5129	0.81552
1.20842	0.85366	1.24101	0.85111	1.51654	0.81539
1.21597	0.85339	1.24052	0.85089	1.51964	0.81529
1.20706	0.85331	1.25031	0.85075	1.52287	0.81511
1.20687	0.85309	1.24906	0.85053	1.52353	0.81502
1.22694	0.853	1.25941	0.85039	1.52377	0.81493
1.21626	0.85278	1.25935	0.85021	1.52706	0.81474
1.23218	0.85265	1.2662	0.85008	1.52613	0.8147
1.21647	0.85239	1.27101	0.8499	1.52538	0.81456
1.23584	0.85234	1.2648	0.84976	1.52432	0.81438
1.22857	0.85208	1.25866	0.84967	1.52441	0.81433
1.24038	0.85195	1.2733	0.8494	1.52986	0.81415
1.2238	0.85186	1.27906	0.84931	1.53334	0.81406
1.23463	0.85164	1.26759	0.84909	1.53601	0.81387
1.22604	0.85155	1.28254	0.84895	1.53874	0.81378
1.23288	0.85133	1.26596	0.84891	1.53893	0.81369
1.24469	0.8512	1.28627	0.84864	1.54131	0.8135
1.23885	0.85098	1.27001	0.84855	1.54378	0.81341
1.25196	0.85085	1.28225	0.84832	1.54294	0.81332
1.23831	0.85081	1.2781	0.84823	1.54149	0.81314
1.25808	0.85054	1.29164	0.8481	1.54275	0.81309
1.24779	0.85046	1.27443	0.84787	1.5426	0.81286
1.25648	0.85024	1.28997	0.84778	1.54117	0.81277
1.24933	0.85015	1.28808	0.84751	1.54843	0.81263
1.25092	0.84993	1.29027	0.84742	1.55172	0.81254
1.262	0.8498	1.27724	0.84733	1.55375	0.81245
1.25942	0.84962	1.27966	0.84706	1.55525	0.81227
1.27034	0.84954	1.28131	0.84697	1.55699	0.81217
1.26947	0.84927	1.28294	0.84675	1.55727	0.81199
1.27562	0.84918	1.2948	0.84661	1.55527	0.8119
1.26442	0.8491	1.30434	0.84652	1.55601	0.81181
1.26501	0.84888	1.30613	0.8463	1.55957	0.81162
1.2745	0.84875	1.29837	0.84616	1.55981	0.81153
1.26844	0.84857	1.31606	0.84594	1.56294	0.81135
1.28428	0.84844	1.31448	0.8458	1.5653	0.81126
1.26798	0.84822	1.31803	0.84571	1.56465	0.81117
1.27829	0.84813	1.30568	0.84549	1.56209	0.81103
1.27155	0.84804	1.32797	0.8454	1.56395	0.81089
1.28279	0.84778	1.32242	0.84517	1.5686	0.81071
1.29258	0.84774	1.33771	0.84508	1.57038	0.81066
1.27363	0.84747	1.34084	0.84486	1.57129	0.81057
1.29466	0.84739	1.3271	0.84477	1.5782	0.81034
1.28429	0.84717	1.33473	0.84463	1.58057	0.81029
1.29771	0.84704	1.33675	0.84445	1.58569	0.81011
1.27884	0.84695	1.34819	0.84436	1.58759	0.81002
1.2898	0.84673	1.33243	0.84423	1.59096	0.80988
1.28472	0.84664	1.33071	0.84405	1.59535	0.80974
1.30117	0.84638	1.34887	0.84396	1.59623	0.80965
1.29604	0.84629	1.33852	0.84373	1.60197	0.80951
1.30634	0.8462	1.35873	0.8436	1.60303	0.80942
1.29686	0.84594	1.36592	0.84342	1.60296	0.80933
1.29711	0.84585	1.36515	0.84328	1.60303	0.80915
1.31384	0.84563	1.35503	0.84319	1.60603	0.80906
1.31142	0.8455	1.35531	0.84301	1.60752	0.80887
1.32425	0.84532	1.37376	0.84292	1.60576	0.80878
1.30473	0.84519	1.38261	0.8427	1.60259	0.80864
1.3266	0.84511	1.36242	0.84261	1.60334	0.80855
1.31578	0.84489	1.38376	0.84252	1.60697	0.80846
1.32874	0.8448	1.37437	0.84229	1.60981	0.80828
1.32604	0.84454	1.3734	0.84225	1.60876	0.80818
1.33896	0.84445	1.3953	0.84202	1.61079	0.80809
1.324	0.84436	1.38232	0.84193	1.60887	0.80795
1.32619	0.84414	1.39861	0.84184	1.60725	0.80786
1.32871	0.84401	1.39953	0.84166	1.61	0.80763
1.32666	0.84383	1.38494	0.84153	1.61387	0.80754
1.34334	0.8437	1.38334	0.84139	1.62192	0.8074
1.32981	0.84361	1.40504	0.84126	1.62344	0.80731
1.3346	0.84344	1.38869	0.84117	1.6261	0.80722
1.33444	0.84331	1.39842	0.84099	1.62961	0.80704
1.33229	0.84313	1.40873	0.8409	1.6302	0.80694
1.35133	0.843	1.40855	0.84067	1.63292	0.80685
1.33428	0.84291	1.4147	0.84058	1.6365	0.80672
1.35224	0.84269	1.41061	0.84045	1.64261	0.80662
1.33646	0.84261	1.40665	0.84032	1.6459	0.80644
1.33767	0.84239	1.42423	0.84023	1.64564	0.80635
1.34329	0.84225	1.42516	0.84005	1.64938	0.80621
1.34623	0.84208	1.4185	0.83996	1.65163	0.80612
1.36349	0.84195	1.4354	0.83987	1.65169	0.80603
1.3464	0.84186	1.42027	0.83973	1.65476	0.80584
1.36001	0.84164	1.41926	0.8396	1.65715	0.80575
1.35436	0.84155	1.42037	0.83942	1.65878	0.80562
1.37272	0.84142	1.42778	0.83937	1.66316	0.80552
1.37334	0.84125	1.44282	0.83915	1.66396	0.80543
1.3589	0.84111	1.42492	0.83906	1.66331	0.80529
1.37717	0.8409	1.43118	0.83901	1.66548	0.8052
1.35878	0.84085	1.4454	0.83879	1.6673	0.80502
1.37035	0.84059	1.43069	0.8387	1.67005	0.80493
1.3683	0.8405	1.43879	0.83852	1.67057	0.80488
1.38381	0.84037	1.45229	0.83843	1.67259	0.8047
1.38567	0.84019	1.43468	0.83834	1.67326	0.80461
1.36967	0.84011	1.44639	0.8382	1.67539	0.80447
1.37822	0.83989	1.44745	0.83807	1.67534	0.80438
1.37815	0.8398	1.45755	0.83789	1.67297	0.80428
1.39407	0.83967	1.45862	0.83784	1.6718	0.80415
1.39879	0.83949	1.45549	0.83771	1.67183	0.80406
1.38236	0.8394	1.4634	0.83753	1.67524	0.80387
1.40247	0.83918	1.46508	0.83748	1.67659	0.80378
1.3862	0.83905	1.46345	0.8373	1.67946	0.80373
1.40492	0.83901	1.46348	0.83717	1.6755	0.80355
1.40943	0.83879	1.45268	0.83703	1.67535	0.80346
1.40661	0.83866	1.47297	0.83694	1.67552	0.80332
1.41242	0.83848	1.46432	0.83685	1.67731	0.80323
1.40156	0.8384	1.46015	0.83667	1.67538	0.80309
1.40216	0.83822	1.48315	0.83658	1.67729	0.80291
1.42162	0.83809	1.48999	0.8364	1.67833	0.80286
1.40552	0.838	1.47913	0.83631	1.67945	0.80268
1.40639	0.83782	1.49335	0.83622	1.67666	0.80259
1.42096	0.83769	1.49911	0.83604	1.66995	0.8025
1.41885	0.83752	1.48038	0.83595	1.66246	0.80231
1.43821	0.83739	1.48236	0.83582	1.6653	0.80222
1.41798	0.83734	1.50213	0.83573	1.66761	0.80213
1.41939	0.83712	1.48925	0.83564	1.67092	0.80194
1.43647	0.83704	1.50284	0.8355	1.67096	0.80181
1.43485	0.83686	1.50185	0.83541	1.67171	0.80162
1.43321	0.83673	1.50697	0.83523	1.67064	0.80153
1.43509	0.83655	1.51687	0.83514	1.67637	0.80135
1.43076	0.83646	1.50168	0.83505	1.6798	0.80121
1.44975	0.83638	1.5068	0.83487	1.68497	0.80112
1.45163	0.83616	1.5271	0.83478	1.69139	0.80094
1.43432	0.83611	1.52397	0.83465	1.69372	0.80084
1.45128	0.83598	1.51605	0.83456	1.69661	0.80075
1.44487	0.83576	1.52619	0.83447	1.69963	0.80057
1.43472	0.83572	1.51646	0.83433	1.6998	0.80048
1.45837	0.8355	1.53479	0.83424	1.70279	0.80029
1.44476	0.83541	1.54106	0.83411	1.70392	0.8002
1.44727	0.83524	1.52304	0.83402	1.7055	0.80002
1.46625	0.83515	1.52897	0.83397	1.70745	0.79993
1.45142	0.83502	1.52712	0.83379	1.71015	0.79983
1.45148	0.83489	1.53553	0.8337	1.71154	0.79965
1.46573	0.83475	1.54591	0.83357	1.71118	0.79956
1.44844	0.83467	1.52936	0.83348	1.71316	0.79942
1.46714	0.83445	1.54741	0.83339	1.71726	0.79928
1.47258	0.8344	1.53422	0.83325	1.71655	0.79919
1.45795	0.83418	1.54126	0.83316	1.7169	0.79901
1.47456	0.8341	1.55014	0.83298	1.71698	0.79892
1.47803	0.83392	1.53478	0.83294	1.72129	0.79873
1.46158	0.83383	1.55196	0.83285	1.72205	0.79864
1.47854	0.8337	1.56019	0.83267	1.72694	0.7986
1.48419	0.83353	1.55301	0.83262	1.73482	0.79837
1.4655	0.83344	1.55847	0.83244	1.73573	0.79828
1.48065	0.83322	1.54299	0.83235	1.73963	0.79814
1.48578	0.83318	1.54813	0.83222	1.74111	0.79805
1.47302	0.83309	1.56483	0.83213	1.73964	0.79795
1.49115	0.83287	1.54943	0.83204	1.73783	0.79777
1.47725	0.83278	1.55787	0.83186	1.74129	0.79768
1.47794	0.83261	1.5552	0.83181	1.73814	0.7975
1.49821	0.83247	1.57164	0.83172	1.73769	0.7974
1.47623	0.83239	1.57209	0.83154	1.74215	0.79731
1.47869	0.83221	1.55912	0.8315	1.74242	0.79713
1.49986	0.83212	1.56699	0.83136	1.74566	0.79704
1.49888	0.83195	1.56518	0.83127	1.74753	0.79685
1.4854	0.83186	1.56298	0.83114	1.75121	0.79676
1.49374	0.83173	1.57876	0.83105	1.75201	0.79667
1.49849	0.83155	1.56052	0.83096	1.75437	0.79653
1.50393	0.83146	1.57024	0.83078	1.75659	0.79639
1.50993	0.83129	1.57092	0.83073	1.75894	0.79621
1.48927	0.83116	1.57377	0.83064	1.76233	0.79617
1.49394	0.83098	1.58315	0.83046	1.76313	0.79607
1.51219	0.83089	1.56497	0.83042	1.76931	0.79589
1.49645	0.83081	1.57122	0.83024	1.77283	0.7958
1.49565	0.83063	1.59276	0.83015	1.77963	0.79562
1.51294	0.83054	1.5858	0.83001	1.78037	0.79552
1.51425	0.83041	1.58862	0.82992	1.78651	0.79539
1.5188	0.83024	1.57994	0.82983	1.78989	0.79529
1.50272	0.83015	1.58503	0.8297	1.79237	0.7952
1.50781	0.82993	1.60062	0.82961	1.79799	0.79502
1.52379	0.82989	1.59469	0.82943	1.79949	0.79497
1.52546	0.82967	1.5922	0.82938	1.80361	0.79479
1.51051	0.82958	1.58789	0.82929	1.80689	0.7947
1.51452	0.82945	1.58424	0.82911	1.8054	0.79465
1.52417	0.82927	1.60271	0.82902	1.80683	0.79447
1.53373	0.82918	1.60324	0.82889	1.80746	0.79438
1.53248	0.82901	1.5855	0.8288	1.81223	0.79424
1.51568	0.82892	1.58739	0.82862	1.81479	0.79415
1.53292	0.82879	1.60116	0.82853	1.8147	0.79406
1.54015	0.82861	1.60722	0.82848	1.8173	0.79392
1.519	0.82853	1.61088	0.8283	1.818	0.79383
1.53014	0.82831	1.58954	0.82821	1.81748	0.79369
1.52858	0.82822	1.59487	0.82808	1.81971	0.7936
1.52497	0.82818	1.61206	0.82799	1.81989	0.79355
1.54695	0.82796	1.59517	0.8279	1.82562	0.79337
1.527	0.82787	1.60589	0.82776	1.82838	0.79328
1.52912	0.82769	1.60405	0.82767	1.83176	0.79314
1.55069	0.82756	1.61022	0.82749	1.83257	0.79305
1.53504	0.82747	1.61431	0.8274	1.83259	0.79295
1.53391	0.8273	1.60276	0.82731	1.83259	0.79282
1.55475	0.82721	1.59967	0.82714	1.83297	0.79273
1.54099	0.82699	1.62094	0.82705	1.83873	0.79259
1.5478	0.8269	1.62654	0.82691	1.84164	0.7925
1.55526	0.82673	1.60996	0.82682	1.84089	0.79245
1.54229	0.8266	1.63292	0.82673	1.84526	0.79227
1.56397	0.82655	1.62484	0.82659	1.84538	0.79217
1.56559	0.82633	1.63017	0.8265	1.84772	0.79204
1.55082	0.82625	1.63211	0.82633	1.85082	0.79194
1.55277	0.82607	1.62573	0.82624	1.85146	0.7919
1.56002	0.82594	1.63775	0.82619	1.85362	0.79172
1.57319	0.82585	1.64107	0.82601	1.85646	0.79167
1.57332	0.82563	1.62614	0.82592	1.86246	0.79149
1.55921	0.82559	1.62852	0.82574	1.86367	0.79144
1.57593	0.82546	1.64098	0.82565	1.86076	0.79135
1.57789	0.82528	1.62769	0.82552	1.85898	0.79121
1.5675	0.82515	1.64511	0.82543	1.85967	0.79112
1.56188	0.82502	1.62945	0.82534	1.86507	0.79098
1.56867	0.82489	1.63245	0.82516	1.86718	0.79089
1.58374	0.8248	1.64879	0.82511	1.86675	0.79075
1.58301	0.82462	1.63213	0.82502	1.86757	0.79066
1.57102	0.82454	1.63894	0.82484	1.86819	0.79057
1.57721	0.82432	1.65243	0.82475	1.87211	0.79043
1.59419	0.82423	1.65209	0.82457	1.87529	0.79039
1.57642	0.82414	1.64363	0.82448	1.87673	0.79029
1.5873	0.82392	1.66436	0.82435	1.87766	0.79011
1.60065	0.82388	1.6453	0.82426	1.87655	0.79006
1.58592	0.82366	1.66843	0.82417	1.88043	0.78988
1.59738	0.82357	1.6679	0.82399	1.8818	0.78983
1.60455	0.82339	1.65052	0.82394	1.88275	0.7897
1.5889	0.82331	1.66506	0.82385	1.88312	0.78961
1.60119	0.82318	1.66684	0.82367	1.88206	0.78951
1.60706	0.82304	1.65176	0.82358	1.88725	0.78938
1.59126	0.82291	1.66348	0.8234	1.88862	0.78928
1.59517	0.82274	1.67227	0.82331	1.89343	0.78919
1.61248	0.82265	1.66197	0.82322	1.89753	0.78906
1.59794	0.82256	1.67546	0.82309	1.89744	0.78896
1.61421	0.82234	1.65936	0.823	1.89871	0.78883
1.60032	0.82225	1.6661	0.82282	1.89712	0.78873
1.6047	0.82208	1.68696	0.82273	1.8972	0.7886
1.62237	0.82199	1.6687	0.82268	1.89986	0.7885
1.62754	0.82182	1.66386	0.8225	1.90194	0.78846
1.61179	0.82173	1.68684	0.82241	1.90516	0.78832
1.63085	0.8216	1.68	0.82223	1.90389	0.78823
1.63287	0.82142	1.6755	0.82214	1.90299	0.78814
1.61886	0.82133	1.68265	0.82205	1.90173	0.788
1.64067	0.82125	1.67503	0.82192	1.89931	0.78791
1.63559	0.82107	1.69652	0.82183	1.89761	0.78773
1.62621	0.82098	1.69852	0.82165	1.89411	0.78768
1.63135	0.82081	1.68284	0.82156	1.89408	0.7875
1.63388	0.82068	1.6987	0.82151	1.89576	0.7874
1.64545	0.82054	1.69461	0.82133	1.89576	0.78731
1.64249	0.82041	1.67678	0.82124	1.90028	0.78717
1.63385	0.82032	1.68006	0.82106	1.90139	0.78708
1.64378	0.82015	1.69744	0.82097	1.90503	0.78694
1.64169	0.81997	1.68501	0.82088	1.90749	0.78685
1.64473	0.81962	1.70061	0.82075	1.90703	0.78676
1.64897	0.81927	1.6962	0.82066	1.91166	0.78658
1.65238	0.8191	1.69828	0.82048	1.91183	0.78649
1.65379	0.81892	1.69878	0.82034	1.91473	0.7863
1.67276	0.81883	1.69213	0.8203	1.91647	0.78621
1.67054	0.81866	1.69419	0.82012	1.91739	0.78612
1.65678	0.81857	1.71369	0.82003	1.91629	0.78598
1.67723	0.81848	1.71552	0.81989	1.91809	0.78589
1.68601	0.81826	1.69743	0.8198	1.91879	0.7858
1.66834	0.81822	1.71763	0.81967	1.92176	0.78566
1.67123	0.81804	1.72083	0.81949	1.92354	0.78557
1.69021	0.81791	1.70831	0.81944	1.92485	0.78539
1.67529	0.81787	1.71352	0.81926	1.92562	0.78529
1.67555	0.81769	1.73079	0.81917	1.92608	0.78516
1.68903	0.81761	1.71856	0.81908	1.92287	0.78506
1.69177	0.81743	1.73108	0.81895	1.92414	0.78497
1.67928	0.81734	1.72944	0.81886	1.92352	0.78479
1.69538	0.81725	1.73571	0.81877	1.92392	0.7847
1.69613	0.81708	1.74248	0.81859	1.9275	0.78461
1.68433	0.81699	1.73066	0.81854	1.9301	0.78442
1.68706	0.81682	1.73113	0.81836	1.92899	0.78438
1.69688	0.81673	1.75055	0.81827	1.9309	0.78419
1.69896	0.81655	1.74373	0.81809	1.93029	0.7841
1.70533	0.8162	1.73926	0.818	1.932	0.78392
1.70852	0.81585	1.74278	0.81796	1.93373	0.78383
1.71516	0.8155	1.7374	0.81778	1.93738	0.78373
1.71802	0.81532	1.75288	0.81769	1.93962	0.78355
1.70576	0.81519	1.73703	0.8176	1.94273	0.78346
1.72342	0.81515	1.74256	0.81746	1.94711	0.78337
1.72642	0.81497	1.76175	0.81737	1.95439	0.78318
1.71078	0.81489	1.76664	0.81719	1.95758	0.78314
1.71437	0.81471	1.76255	0.81715	1.96042	0.78295
1.73374	0.81462	1.76571	0.81697	1.96104	0.78286
1.72285	0.81454	1.75236	0.81688	1.96553	0.78273
1.72589	0.81436	1.76982	0.81683	1.97064	0.78263
1.73995	0.81427	1.76906	0.81665	1.97383	0.78254
1.7404	0.8141	1.75191	0.81656	1.97847	0.7824
1.73596	0.81405	1.76236	0.81643	1.97829	0.78231
1.73602	0.81392	1.75726	0.81634	1.98214	0.78222
1.74151	0.81375	1.76042	0.81625	1.98399	0.78208
1.73153	0.81366	1.76917	0.81607	1.97901	0.78199
1.74443	0.81353	1.75234	0.81598	1.98482	0.78181
1.73939	0.81344	1.75146	0.8158	1.98976	0.78172
1.73879	0.81326	1.77409	0.81571	1.99455	0.78158
1.75874	0.81318	1.75504	0.81566	2.00005	0.78153
1.74091	0.81309	1.75661	0.81548	2.0041	0.78144
1.74548	0.81291	1.77485	0.81539	2.00866	0.7813
1.76039	0.81282	1.77462	0.81521	2.01204	0.78121
1.74133	0.81274	1.7609	0.81512	2.01707	0.78107
1.74315	0.81256	1.78358	0.81503	2.01883	0.78098
1.7578	0.81252	1.77829	0.8149	2.02131	0.78094
1.76257	0.8123	1.78268	0.81481	2.02108	0.78075
1.74519	0.81221	1.78515	0.81463	2.02284	0.78071
1.74901	0.81208	1.78159	0.81454	2.02918	0.78057
1.77092	0.81199	1.79088	0.81445	2.03039	0.78048
1.75202	0.81186	1.79591	0.81427	2.03245	0.78043
1.75957	0.81173	1.7793	0.81418	2.03199	0.78029
1.77347	0.81164	1.77874	0.81404	2.03372	0.7802
1.7599	0.81155	1.79482	0.81395	2.0347	0.78006
1.76317	0.81138	1.77981	0.81386	2.03493	0.78002
1.77901	0.81129	1.78813	0.81368	2.03456	0.77993
1.78134	0.81111	1.80338	0.81359	2.03442	0.77979
1.7702	0.81103	1.81111	0.81341	2.03619	0.77974
1.7739	0.81085	1.81383	0.81337	2.04034	0.77956
1.78228	0.81076	1.79476	0.81328	2.04315	0.77951
1.77431	0.81068	1.79439	0.8131	2.04382	0.77947
1.78563	0.81054	1.81131	0.81305	2.04837	0.77928
1.7751	0.81046	1.81282	0.81287	2.04768	0.77924
1.78037	0.81032	1.79707	0.81278	2.04618	0.7791
1.77833	0.81015	1.8005	0.8126	2.04578	0.77901
1.77626	0.81011	1.81344	0.81252	2.04721	0.77892
1.78438	0.80993	1.80121	0.81243	2.04828	0.77883
1.79337	0.80984	1.82436	0.81229	2.05214	0.77873
1.80096	0.80967	1.80306	0.8122	2.05811	0.7786
1.78498	0.80958	1.80654	0.81202	2.05916	0.7785
1.80277	0.80949	1.82553	0.81193	2.06454	0.77837
1.80454	0.80932	1.80823	0.81184	2.06275	0.77828
1.78865	0.80923	1.81113	0.81166	2.0626	0.77823
1.78784	0.80905	1.82824	0.81157	2.06201	0.77809
1.80906	0.80901	1.82949	0.81144	2.06346	0.778
1.7925	0.80892	1.81801	0.81135	2.06148	0.77795
1.79924	0.8087	1.8352	0.81126	2.06411	0.77782
1.81791	0.80861	1.83171	0.81108	2.06521	0.77772
1.82111	0.80848	1.8214	0.81099	2.06902	0.77759
1.80431	0.8084	1.82562	0.81081	2.06712	0.77754
1.82101	0.80831	1.82439	0.81076	2.06766	0.77736
1.82258	0.80813	1.84738	0.81067	2.07042	0.77727
1.81109	0.80804	1.84287	0.81049	2.07187	0.77722
1.82654	0.80791	1.82501	0.81045	2.07437	0.77708
1.82081	0.80782	1.82634	0.81027	2.07731	0.77699
1.82533	0.80774	1.84724	0.81013	2.08057	0.77685
1.82576	0.80752	1.8315	0.81004	2.08265	0.77681
1.81789	0.80747	1.83704	0.80991	2.0831	0.77672
1.81572	0.8073	1.85531	0.80982	2.08637	0.77653
1.83685	0.80721	1.85429	0.80964	2.08785	0.77649
1.82361	0.80712	1.83578	0.80955	2.09311	0.77635
1.82808	0.80695	1.84197	0.8095	2.09306	0.77626
1.84797	0.80686	1.8528	0.80928	2.09264	0.77621
1.84911	0.80668	1.84344	0.80919	2.09465	0.77607
1.8353	0.80664	1.86512	0.80905	2.09469	0.77598
1.85086	0.80655	1.85526	0.80896	2.09949	0.77584
1.85246	0.80638	1.86866	0.80887	2.10104	0.7758
1.84286	0.80633	1.8748	0.80874	2.10283	0.77571
1.84079	0.80611	1.86041	0.80865	2.10479	0.77557
1.84972	0.80603	1.86104	0.80847	2.10684	0.77552
1.84193	0.8059	1.87573	0.80838	2.1087	0.77534
1.85587	0.80581	1.86605	0.80829	2.1101	0.77529
1.83972	0.80572	1.8769	0.80811	2.11254	0.77525
1.84301	0.80559	1.87217	0.80806	2.11632	0.77506
1.86099	0.8055	1.8719	0.80788	2.11441	0.77502
1.84575	0.80541	1.89118	0.80779	2.11729	0.77488
1.8507	0.80519	1.89252	0.80766	2.11755	0.77479
1.86731	0.80515	1.87921	0.80757	2.12005	0.77474
1.87581	0.80497	1.89825	0.80748	2.12116	0.77461
1.86214	0.80489	1.88465	0.80734	2.12252	0.77451
1.87165	0.80475	1.90271	0.80725	2.12555	0.77438
1.86884	0.80467	1.88711	0.80716	2.12499	0.77433
1.87626	0.80458	1.88525	0.80698	2.12623	0.77424
1.88136	0.8044	1.90371	0.80694	2.12959	0.7741
1.85994	0.80432	1.90744	0.80676	2.13129	0.77401
1.88227	0.80423	1.89625	0.80667	2.13446	0.77387
1.88424	0.8041	1.91787	0.80653	2.13744	0.77383
1.87076	0.80401	1.89743	0.80644	2.13931	0.77369
1.87216	0.80383	1.91943	0.80635	2.14304	0.7736
1.89294	0.80375	1.91668	0.80622	2.14302	0.77355
1.88288	0.80361	1.90479	0.80613	2.14995	0.77337
1.89184	0.80353	1.9208	0.80599	2.15236	0.77332
1.88506	0.80344	1.90318	0.8059	2.15781	0.77328
1.88271	0.80331	1.92203	0.80581	2.16162	0.77314
1.90152	0.80322	1.92683	0.80568	2.16307	0.77309
1.90665	0.80304	1.90865	0.80559	2.16746	0.77295
1.89324	0.80296	1.91935	0.80541	2.17223	0.77286
1.90345	0.80287	1.9201	0.80536	2.17504	0.77277
1.9057	0.80269	1.93102	0.80527	2.17678	0.77268
1.90953	0.80265	1.92963	0.80509	2.17564	0.77263
1.91437	0.80247	1.91087	0.80505	2.17941	0.7725
1.89871	0.80239	1.91803	0.80487	2.18057	0.77245
1.91705	0.80234	1.92628	0.80478	2.18262	0.77231
1.92155	0.80217	1.92339	0.80469	2.18325	0.77227
1.90764	0.80208	1.9371	0.80455	2.18394	0.77222
1.92562	0.80195	1.92143	0.80446	2.18387	0.77208
1.90539	0.80186	1.92548	0.80433	2.18508	0.77199
1.92975	0.80177	1.9462	0.80419	2.18662	0.7719
1.92611	0.8016	1.92837	0.80415	2.18794	0.77181
1.90992	0.80155	1.93197	0.80397	2.18738	0.77176
1.91484	0.80138	1.93985	0.80388	2.19115	0.77162
1.93045	0.80129	1.92992	0.80374	2.19297	0.77158
1.92033	0.8012	1.95059	0.80365	2.19646	0.77144
1.93669	0.80107	1.93308	0.80356	2.19724	0.77139
1.9225	0.80098	1.93917	0.80343	2.2014	0.77135
1.94152	0.80089	1.9589	0.80334	2.20327	0.77121
1.94047	0.80076	1.95559	0.80316	2.20318	0.77112
1.92575	0.80068	1.96061	0.80311	2.20399	0.77103
1.93199	0.8005	1.94251	0.80302	2.20154	0.77094
1.93055	0.80046	1.94678	0.80284	2.20259	0.77089
1.93707	0.80028	1.96346	0.80275	2.20274	0.77075
1.9547	0.80019	1.96287	0.80262	2.2035	0.77071
1.9395	0.80015	1.94945	0.80253	2.2068	0.77057
1.94695	0.79997	1.97262	0.80239	2.20734	0.77052
1.95176	0.79993	1.95298	0.8023	2.20791	0.77043
1.94818	0.79975	1.97338	0.80221	2.21329	0.77029
1.96444	0.79971	1.9765	0.80208	2.21345	0.77025
1.9527	0.79962	1.95702	0.80199	2.21789	0.77011
1.96451	0.79949	1.9635	0.80181	2.21963	0.77006
1.95981	0.7994	1.96214	0.80176	2.22437	0.76993
1.95621	0.79923	1.98278	0.80167	2.22422	0.76988
1.97448	0.79914	1.9873	0.80149	2.22817	0.76979
1.95452	0.7991	1.97431	0.80145	2.22991	0.7697
1.96078	0.79892	1.98011	0.80127	2.23102	0.76961
1.96373	0.79888	1.98399	0.80122	2.23089	0.76956
1.95941	0.79875	1.98145	0.80104	2.23357	0.76942
1.97931	0.79866	1.99825	0.801	2.23339	0.76938
1.97179	0.79853	1.9873	0.80091	2.23591	0.76924
1.97469	0.79844	1.99961	0.80077	2.23597	0.76919
1.97108	0.79835	1.99623	0.80068	2.23818	0.76906
1.96766	0.79822	2.00864	0.80059	2.23814	0.76901
1.98403	0.79813	2.0091	0.80046	2.23996	0.76892
1.98797	0.79796	1.9946	0.80037	2.24329	0.76883
1.97238	0.79787	2.00225	0.80023	2.2453	0.76873
1.97648	0.79783	2.0014	0.80014	2.24655	0.76869
1.97911	0.79765	1.99424	0.80001	2.2492	0.76855
1.99629	0.79756	2.01622	0.79992	2.25386	0.76851
1.99677	0.79743	1.99571	0.79983	2.25517	0.76837
1.98572	0.79734	2.01541	0.79969	2.25801	0.76832
2.00221	0.79721	1.99819	0.7996	2.25975	0.76818
1.9859	0.79717	2.00048	0.79942	2.26242	0.76814
2.00665	0.79708	2.02001	0.79938	2.2626	0.76805
2.00421	0.7969	2.00641	0.79929	2.2647	0.76795
2.00055	0.79686	2.01377	0.79915	2.26562	0.76791
1.99537	0.79677	2.00996	0.79906	2.26753	0.76782
1.99252	0.7966	2.00175	0.79893	2.26722	0.76772
2.01224	0.79601	2.02152	0.79884	2.26887	0.76763
2.01025	0.79588	2.00468	0.79875	2.27154	0.7675
1.99942	0.79579	2.0138	0.79857	2.27187	0.7675
2.02085	0.79566	2.01329	0.79853	2.27703	0.76736
2.00459	0.79557	2.00912	0.79834	2.27861	0.76727
2.02516	0.79553	2.02349	0.79825	2.27903	0.76722
2.02497	0.79535	2.00852	0.79821	2.28006	0.76708
2.02024	0.79531	2.00963	0.79803	2.28078	0.76704
2.01682	0.79522	2.02869	0.79794	2.28271	0.76695
2.01457	0.79504	2.03047	0.79776	2.28369	0.76685
2.02972	0.795	2.03036	0.79772	2.28298	0.76681
2.02712	0.79482	2.02159	0.79763	2.28131	0.76667
2.02697	0.79478	2.02464	0.79749	2.28046	0.76662
2.03959	0.79465	2.04543	0.7974	2.28336	0.76649
2.02329	0.79456	2.03548	0.79727	2.28327	0.76639
2.03946	0.79443	2.04005	0.79718	2.28419	0.76639
2.0238	0.79434	2.0495	0.797	2.28479	0.76621
2.04056	0.7943	2.03117	0.79695	2.28577	0.76617
2.04487	0.79412	2.04911	0.79686	2.28711	0.76603
2.0468	0.79408	2.0473	0.79664	2.28546	0.76598
2.04997	0.7939	2.05803	0.79646	2.28675	0.76589
2.03284	0.79386	2.04484	0.79641	2.29106	0.7658
2.04878	0.79373	2.04897	0.79623	2.29441	0.76571
2.03671	0.79364	2.05794	0.79619	2.3	0.76557
2.03967	0.79351	2.05455	0.79601	2.30336	0.76552
2.05139	0.79347	2.07478	0.79592	2.30404	0.76548
2.04557	0.79329	2.0765	0.79578	2.30769	0.76534
2.06311	0.7932	2.06828	0.79574	2.30823	0.76525
2.05591	0.79311	2.07962	0.79556	2.30894	0.7652
2.05883	0.79303	2.0632	0.79551	2.3101	0.76506
2.05092	0.79294	2.07381	0.79533	2.31129	0.76502
2.0519	0.79281	2.07187	0.79529	2.31292	0.76488
2.0601	0.79276	2.0665	0.79515	2.31438	0.76479
2.05288	0.79259	2.08298	0.79506	2.32003	0.7647
2.05719	0.79246	2.07716	0.79497	2.3226	0.76461
2.06129	0.79241	2.09029	0.79484	2.32252	0.76456
2.05698	0.79228	2.07484	0.79479	2.32507	0.76442
2.07388	0.79219	2.0791	0.79461	2.32618	0.76438
2.06162	0.79211	2.08375	0.79457	2.32866	0.76433
2.07854	0.79197	2.07687	0.79443	2.33203	0.76419
2.06443	0.79193	2.09911	0.79434	2.33628	0.76415
2.0708	0.79175	2.08265	0.79421	2.34001	0.76401
2.07836	0.79171	2.09897	0.79412	2.34378	0.76392
2.0751	0.79158	2.10466	0.79398	2.34608	0.76383
2.09113	0.79149	2.08583	0.79389	2.34708	0.76378
2.08652	0.79136	2.10924	0.79376	2.34721	0.76369
2.09956	0.79127	2.09243	0.79371	2.35136	0.7636
2.09425	0.79118	2.10392	0.79358	2.35308	0.76355
2.10063	0.7911	2.09697	0.79349	2.35243	0.76346
2.10544	0.79097	2.11447	0.7934	2.35576	0.76337
2.09751	0.79092	2.1175	0.79326	2.35504	0.76328
2.09529	0.79083	2.11304	0.79322	2.35633	0.76318
2.09244	0.7907	2.12508	0.79304	2.35671	0.76314
2.10128	0.79066	2.11367	0.79295	2.36116	0.763
2.099	0.79048	2.11777	0.79286	2.36304	0.76295
2.11474	0.79044	2.10941	0.79277	2.36661	0.76286
2.1037	0.79031	2.11233	0.79263	2.37213	0.76277
2.12044	0.79022	2.11878	0.79259	2.37501	0.76272
2.11752	0.79009	2.11222	0.79241	2.37958	0.76259
2.12026	0.79004	2.13122	0.79232	2.37982	0.76254
2.12328	0.78991	2.12038	0.79223	2.38087	0.7625
2.10304	0.78982	2.12954	0.79214	2.38303	0.76236
2.12542	0.78969	2.13726	0.792	2.38423	0.76231
2.10915	0.78965	2.12424	0.79191	2.39115	0.76222
2.12858	0.78956	2.1399	0.79178	2.39251	0.76213
2.1123	0.78943	2.12721	0.79169	2.39515	0.76213
2.13152	0.78939	2.14879	0.79164	2.40005	0.76199
2.13487	0.78921	2.14492	0.79146	2.39973	0.76195
2.12712	0.78912	2.14429	0.79142	2.40228	0.76185
2.13855	0.78904	2.14967	0.79128	2.404	0.76181
2.1208	0.78895	2.13726	0.79119	2.40671	0.76172
2.12896	0.7889	2.14897	0.79106	2.40799	0.76162
2.12668	0.78877	2.13854	0.79101	2.41069	0.76158
2.14528	0.78868	2.14744	0.79083	2.41349	0.76149
2.1356	0.78855	2.15271	0.79079	2.41214	0.76139
2.13397	0.78842	2.14411	0.79065	2.41321	0.76139
2.1428	0.78838	2.16197	0.79056	2.41666	0.76126
2.15502	0.78829	2.1572	0.79052	2.41836	0.76121
2.14876	0.78816	2.16581	0.79038	2.42269	0.76112
2.15034	0.78811	2.14968	0.79029	2.4221	0.76107
2.15684	0.78798	2.16316	0.79016	2.42288	0.76103
2.15018	0.78794	2.15288	0.79011	2.42427	0.76094
2.16262	0.78776	2.16206	0.78993	2.4262	0.76084
2.14452	0.78772	2.1651	0.78989	2.42828	0.76075
2.16444	0.78759	2.15834	0.78975	2.42902	0.76071
2.15058	0.78754	2.1705	0.78966	2.43158	0.76062
2.1714	0.78741	2.15996	0.78953	2.43359	0.76057
2.15337	0.78737	2.17543	0.78948	2.43541	0.76048
2.15919	0.78719	2.17823	0.7893	2.43731	0.76039
2.1613	0.78715	2.17487	0.78926	2.43718	0.76034
2.15544	0.78702	2.18642	0.78912	2.43825	0.76025
2.16281	0.78697	2.17466	0.78903	2.43761	0.7602
2.15916	0.78684	2.18055	0.78899	2.43722	0.76016
2.17385	0.78675	2.17585	0.78881	2.43562	0.76002
2.15983	0.78662	2.19549	0.78876	2.43577	0.75997
2.1819	0.78658	2.18167	0.78863	2.43954	0.75988
2.1697	0.78645	2.19683	0.78854	2.44022	0.75983
2.18157	0.78636	2.19215	0.7884	2.44037	0.75979
2.17035	0.78627	2.18898	0.78836	2.4401	0.75965
2.17804	0.78618	2.19614	0.78818	2.4395	0.75961
2.18816	0.78605	2.17897	0.78813	2.44173	0.75951
2.17024	0.78597	2.19023	0.788	2.44082	0.75947
2.1903	0.78588	2.18108	0.78791	2.44206	0.75938
2.17359	0.78579	2.1828	0.78777	2.44516	0.75928
2.19322	0.7857	2.19192	0.78773	2.4451	0.75924
2.17923	0.78557	2.18524	0.78759	2.44566	0.7591
2.1949	0.78553	2.20687	0.7875	2.44675	0.75906
2.18899	0.7854	2.19715	0.78737	2.44954	0.75896
2.19897	0.78535	2.20292	0.78728	2.45315	0.75887
2.19554	0.78518	2.19183	0.78723	2.45555	0.75883
2.19732	0.78513	2.19501	0.78705	2.45739	0.75878
2.20887	0.785	2.21599	0.78696	2.45823	0.75869
2.19405	0.78491	2.19819	0.78687	2.46009	0.7586
2.2064	0.78478	2.21773	0.78678	2.45921	0.75851
2.19126	0.78474	2.21209	0.78665	2.45861	0.75841
2.20497	0.78461	2.21797	0.78656	2.45772	0.75837
2.19291	0.78452	2.22549	0.78642	2.45935	0.75828
2.20735	0.78443	2.21182	0.78633	2.46187	0.75818
2.20225	0.78434	2.23073	0.78624	2.46339	0.75809
2.21765	0.78425	2.21768	0.78615	2.46559	0.75805
2.20869	0.78417	2.22968	0.78606	2.46604	0.758
2.22115	0.78408	2.22222	0.78593	2.46508	0.75786
2.22505	0.78395	2.2347	0.78588	2.46512	0.75782
2.21736	0.7839	2.23169	0.7857	2.46725	0.75768
2.2251	0.78377	2.23304	0.78566	2.46823	0.75763
2.21094	0.78368	2.24578	0.78552	2.46767	0.75759
2.22926	0.78355	2.2333	0.78543	2.47001	0.75745
2.21569	0.78351	2.24828	0.7853	2.47163	0.7574
2.2246	0.78338	2.23428	0.78525	2.47703	0.75727
2.2156	0.78329	2.24815	0.78516	2.47699	0.75722
2.22151	0.78316	2.25419	0.78494	2.47994	0.75717
2.22986	0.78311	2.24873	0.78485	2.47801	0.75704
2.22757	0.78298	2.26385	0.78476	2.47757	0.75699
2.23448	0.78294	2.25814	0.78462	2.4769	0.75685
2.22786	0.78276	2.25259	0.78458	2.4765	0.75681
2.24302	0.78272	2.26017	0.78444	2.46066	0.75667
2.23282	0.78259	2.24469	0.78435	2.4589	0.75662
2.25156	0.78254	2.26229	0.78422	2.46001	0.75653
2.24012	0.78241	2.24478	0.78417	2.46301	0.75644
2.25064	0.78232	2.25259	0.784	2.46687	0.75635
2.23586	0.78228	2.25282	0.78395	2.46791	0.75621
2.24782	0.78215	2.25526	0.78382	2.46731	0.75617
2.23662	0.78206	2.27596	0.78372	2.4678	0.75607
2.23921	0.78193	2.26037	0.78363	2.47409	0.75594
2.24719	0.78189	2.27611	0.78354	2.47724	0.75589
2.24355	0.78175	2.27124	0.78341	2.4822	0.75575
2.25733	0.78167	2.27955	0.78336	2.48627	0.75566
2.24529	0.78158	2.28271	0.78319	2.48738	0.75562
2.2627	0.78149	2.27745	0.78314	2.49164	0.75548
2.25729	0.78136	2.26704	0.7831	2.49052	0.75539
2.26848	0.78127	2.27101	0.78292	2.49673	0.75529
2.2643	0.78118	2.27466	0.78287	2.49815	0.7552
2.26884	0.7811	2.2721	0.78274	2.50228	0.75516
2.25857	0.78101	2.28845	0.78265	2.5073	0.75502
2.27012	0.78092	2.28104	0.78251	2.50718	0.75497
2.26112	0.78083	2.29735	0.78247	2.51087	0.75488
2.26545	0.7807	2.28961	0.78233	2.51345	0.75474
2.27057	0.78066	2.29617	0.78224	2.51475	0.7547
2.26546	0.78053	2.30252	0.78211	2.51889	0.75461
2.28669	0.78044	2.29643	0.78206	2.52008	0.75451
2.27297	0.78035	2.28675	0.78197	2.51981	0.75447
2.28885	0.78026	2.29307	0.78184	2.52103	0.75433
2.2828	0.78013	2.29753	0.78179	2.52032	0.75428
2.29254	0.78009	2.29079	0.78166	2.52251	0.75415
2.28577	0.77996	2.30781	0.78152	2.52382	0.7541
2.2964	0.77987	2.2926	0.78148	2.52757	0.75406
2.28836	0.77978	2.31423	0.78139	2.52567	0.75392
2.2975	0.77969	2.29931	0.78125	2.52697	0.75383
2.3034	0.77956	2.31595	0.78121	2.52679	0.75373
2.29881	0.77952	2.31274	0.78103	2.52862	0.75369
2.31246	0.77939	2.31265	0.78098	2.5322	0.7536
2.30414	0.77934	2.32163	0.78085	2.5346	0.75351
2.31528	0.77921	2.31545	0.7808	2.53776	0.75341
2.30827	0.77917	2.32712	0.78062	2.53837	0.75328
2.30577	0.77908	2.30843	0.78058	2.54088	0.75323
2.30282	0.77895	2.32917	0.78044	2.54013	0.75318
2.30884	0.7789	2.31215	0.7804	2.54554	0.75305
2.30552	0.77877	2.32855	0.78026	2.54643	0.753
2.31273	0.77868	2.31782	0.78017	2.55349	0.75286
2.30729	0.7786	2.33	0.78008	2.55484	0.75282
2.3173	0.77855	2.32032	0.77999	2.55585	0.75277
2.31312	0.77842	2.32213	0.77986	2.55032	0.75263
2.32229	0.77838	2.33648	0.77977	2.54773	0.75259
2.31591	0.77825	2.32599	0.77968	2.54874	0.75245
2.33387	0.77816	2.34391	0.77959	2.54786	0.7524
2.3205	0.77807	2.32801	0.7795	2.54967	0.75227
2.33776	0.77798	2.34889	0.77941	2.55169	0.75222
2.32249	0.77785	2.3388	0.77927	2.5534	0.75213
2.33903	0.77781	2.3511	0.77923	2.5579	0.75204
2.32304	0.77768	2.34797	0.77905	2.55957	0.75195
2.34179	0.77763	2.34325	0.779	2.56321	0.75185
2.32933	0.7775	2.35107	0.77887	2.56232	0.75176
2.35046	0.77746	2.3465	0.77882	2.56194	0.75172
2.33797	0.77732	2.34296	0.77873	2.56368	0.75158
2.34834	0.77728	2.33925	0.7786	2.56399	0.75153
2.33517	0.77715	2.36369	0.77846	2.56738	0.75139
2.34638	0.77706	2.34424	0.77837	2.56711	0.7513
2.33823	0.77697	2.36247	0.77833	2.57186	0.75126
2.34895	0.77689	2.35205	0.77819	2.572	0.75112
2.33399	0.77684	2.36392	0.7781	2.57487	0.75107
2.35082	0.77671	2.35339	0.77801	2.57595	0.75098
2.33378	0.77667	2.36173	0.77792	2.58051	0.75089
2.34636	0.77649	2.36554	0.77779	2.58169	0.7508
2.34723	0.77645	2.34819	0.7777	2.58187	0.75071
2.34411	0.77632	2.37065	0.77756	2.58078	0.75062
2.3483	0.77627	2.35466	0.77752	2.58397	0.75057
2.34652	0.77614	2.36811	0.77738	2.58596	0.75043
2.36544	0.77605	2.35716	0.77729	2.58591	0.75039
2.353	0.77596	2.3771	0.77725	2.58935	0.75025
2.36909	0.77588	2.37175	0.77707	2.59122	0.7502
2.35284	0.77579	2.38009	0.77702	2.59189	0.75011
2.36917	0.7757	2.38776	0.77689	2.5931	0.74997
2.36377	0.77557	2.37189	0.7768	2.59408	0.74993
2.37719	0.77553	2.38767	0.77671	2.5953	0.74979
2.36486	0.7754	2.37578	0.77662	2.59693	0.74974
2.37592	0.77535	2.39248	0.77648	2.59782	0.7497
2.36439	0.77526	2.37673	0.77644	2.59969	0.74956
[truncated: 10,594 more rows]

## Sheet: pH = 5，Stress-compation
Stress	SP5-10(3)	Stress	SP10-15(3)	Stress	SP15-20(3)
0	1	0	1	0	1
0.10068	0.98958	0.10131	0.97152	0.10033	0.96911
0.10078	0.98803	0.10076	0.97152	0.10028	0.96911
0.10149	0.98803	0.10094	0.97152	0.10054	0.96907
0.10094	0.98803	0.10135	0.97152	0.09963	0.96907
0.10103	0.98803	0.10256	0.97147	0.09977	0.96907
0.10164	0.98803	0.10242	0.97147	0.09926	0.96907
0.1009	0.98799	0.10106	0.97147	0.09871	0.96902
0.10127	0.98799	0.10064	0.97147	0.09903	0.96902
0.1021	0.98799	0.10018	0.97147	0.09976	0.96902
0.0998	0.98799	0.09917	0.97143	0.0987	0.96902
0.10085	0.98799	0.09985	0.97143	0.09982	0.96902
0.10018	0.98795	0.10053	0.97143	0.10023	0.96902
0.10025	0.98795	0.10031	0.97143	0.09894	0.96898
0.1019	0.98795	0.09986	0.97143	0.0988	0.96898
0.10076	0.98795	0.10127	0.97139	0.09889	0.96898
0.10152	0.9879	0.10085	0.97139	0.09917	0.96898
0.1008	0.9879	0.10122	0.97139	0.0999	0.96898
0.10181	0.9879	0.10182	0.97139	0.09866	0.96893
0.10374	0.9879	0.1026	0.97139	0.09972	0.96893
0.10281	0.9879	0.10283	0.97134	0.09926	0.96893
0.11005	0.98786	0.10275	0.97134	0.10134	0.96893
0.10283	0.98786	0.10388	0.97134	0.10117	0.96888
0.10385	0.98786	0.10396	0.97134	0.09996	0.96888
0.10287	0.98786	0.10383	0.9713	0.10101	0.96888
0.10355	0.98786	0.10265	0.9713	0.10168	0.96888
0.10255	0.98781	0.1041	0.9713	0.10233	0.96888
0.10301	0.98781	0.10346	0.9713	0.10127	0.96884
0.10247	0.98781	0.10261	0.9713	0.10201	0.96884
0.10269	0.98781	0.09432	0.97125	0.10166	0.96884
0.10224	0.98781	0.10374	0.97125	0.10237	0.96884
0.09282	0.98777	0.10302	0.97125	0.10178	0.96884
0.10261	0.98777	0.10306	0.97125	0.10279	0.96879
0.10309	0.98777	0.1022	0.97125	0.10269	0.96879
0.10187	0.98777	0.10385	0.97121	0.10325	0.96879
0.10159	0.98777	0.10351	0.97121	0.10242	0.96879
0.10323	0.98773	0.10371	0.97121	0.10417	0.96879
0.10311	0.98773	0.10387	0.97121	0.10324	0.96875
0.10261	0.98773	0.10433	0.97121	0.10413	0.96875
0.10346	0.98773	0.10761	0.97116	0.10494	0.96875
0.10267	0.98773	0.10407	0.97116	0.10468	0.96875
0.1027	0.98768	0.1047	0.97116	0.10503	0.96875
0.10374	0.98768	0.10399	0.97116	0.10608	0.9687
0.10498	0.98768	0.10429	0.97112	0.10567	0.9687
0.10475	0.98768	0.10457	0.97112	0.10558	0.9687
0.10507	0.98764	0.10457	0.97112	0.1038	0.9687
0.10474	0.98764	0.10274	0.97112	0.10613	0.9687
0.10568	0.98764	0.10428	0.97112	0.10539	0.96866
0.10411	0.98764	0.09756	0.97108	0.10581	0.96866
0.1043	0.98764	0.10497	0.97108	0.1053	0.96866
0.09589	0.9876	0.1053	0.97108	0.1048	0.96866
0.10438	0.9876	0.10494	0.97108	0.10408	0.96861
0.10385	0.9876	0.10451	0.97108	0.10434	0.96861
0.10401	0.9876	0.10511	0.97103	0.10535	0.96861
0.10298	0.9876	0.1046	0.97103	0.10567	0.96861
0.10321	0.98755	0.10598	0.97103	0.1052	0.96861
0.10448	0.98755	0.1052	0.97103	0.10631	0.96856
0.1032	0.98755	0.1053	0.97103	0.10452	0.96856
0.10401	0.98755	0.11555	0.97099	0.10549	0.96856
0.1105	0.98751	0.10583	0.97099	0.10461	0.96856
0.10539	0.98751	0.1057	0.97099	0.10466	0.96856
0.10484	0.98751	0.1048	0.97099	0.10613	0.96852
0.10503	0.98751	0.10521	0.97094	0.10563	0.96852
0.1047	0.98751	0.10415	0.97094	0.10545	0.96852
0.10428	0.98746	0.10577	0.97094	0.1054	0.96852
0.10437	0.98746	0.10576	0.97094	0.10568	0.96847
0.10415	0.98746	0.10626	0.97094	0.10595	0.96847
0.10337	0.98746	0.09624	0.9709	0.10471	0.96847
0.10425	0.98746	0.10182	0.9709	0.10599	0.96847
0.0984	0.98742	0.10378	0.9709	0.10581	0.96847
0.10306	0.98742	0.10584	0.9709	0.10571	0.96847
0.10275	0.98742	0.10419	0.9709	0.10512	0.96843
0.10399	0.98742	0.1054	0.9709	0.10674	0.96843
0.10302	0.98742	0.10411	0.97086	0.10589	0.96843
0.10429	0.98738	0.10376	0.97086	0.10544	0.96843
0.1032	0.98738	0.10606	0.97086	0.10566	0.96843
0.10419	0.98738	0.10512	0.97086	0.10573	0.96838
0.10318	0.98738	0.11476	0.97081	0.10539	0.96838
0.10369	0.98738	0.10553	0.97081	0.10724	0.96838
0.10795	0.98733	0.10667	0.97081	0.10558	0.96838
0.10553	0.98733	0.10621	0.97081	0.10673	0.96833
0.10611	0.98733	0.10648	0.97081	0.10604	0.96833
0.10558	0.98733	0.10612	0.97077	0.10604	0.96833
0.10452	0.98733	0.1059	0.97077	0.10562	0.96833
0.10662	0.98729	0.10576	0.97077	0.10631	0.96833
0.10583	0.98729	0.1048	0.97077	0.10682	0.96829
0.1057	0.98729	0.10698	0.97077	0.10781	0.96829
0.10451	0.98729	0.10439	0.97072	0.10553	0.96829
0.10545	0.98729	0.10479	0.97072	0.10708	0.96829
0.1047	0.98724	0.10451	0.97072	0.1065	0.96824
0.10516	0.98724	0.10469	0.97072	0.1071	0.96824
0.10502	0.98724	0.10551	0.97072	0.10646	0.96824
0.1048	0.98724	0.10485	0.97068	0.10715	0.96824
0.10434	0.98724	0.10437	0.97068	0.10763	0.96824
0.10542	0.9872	0.10507	0.97068	0.10746	0.96824
0.10429	0.9872	0.10462	0.97068	0.10738	0.9682
0.10531	0.9872	0.11183	0.97064	0.10754	0.9682
0.10558	0.9872	0.10712	0.97064	0.10787	0.9682
0.11435	0.98716	0.10693	0.97064	0.10851	0.9682
0.10731	0.98716	0.10667	0.97064	0.10727	0.9682
0.10736	0.98716	0.10598	0.97064	0.10991	0.96815
0.10698	0.98716	0.10657	0.97059	0.1101	0.96815
0.10693	0.98716	0.10593	0.97059	0.10997	0.96815
0.10479	0.98711	0.10584	0.97059	0.11006	0.96815
0.10563	0.98711	0.1062	0.97059	0.11065	0.96815
0.1063	0.98711	0.10635	0.97059	0.11079	0.9681
0.10759	0.98711	0.09716	0.97055	0.11092	0.9681
0.10383	0.98707	0.10525	0.97055	0.11076	0.9681
0.10447	0.98707	0.10588	0.97055	0.11134	0.9681
0.106	0.98707	0.10548	0.97055	0.11094	0.96806
0.10514	0.98707	0.10526	0.97055	0.11052	0.96806
0.10511	0.98707	0.10611	0.9705	0.11029	0.96806
0.10707	0.98707	0.10567	0.9705	0.11084	0.96806
0.10662	0.98702	0.10443	0.9705	0.11177	0.96806
0.10662	0.98702	0.10593	0.9705	0.11102	0.96801
0.10708	0.98702	0.10635	0.9705	0.11098	0.96801
0.10662	0.98702	0.11608	0.97046	0.11331	0.96801
0.10867	0.98702	0.10745	0.97046	0.11208	0.96801
0.10876	0.98698	0.10693	0.97046	0.1118	0.96801
0.108	0.98698	0.10816	0.97046	0.11236	0.96797
0.10795	0.98698	0.10676	0.97042	0.11199	0.96797
0.10876	0.98698	0.10876	0.97042	0.11341	0.96797
0.10881	0.98694	0.108	0.97042	0.11294	0.96797
0.10845	0.98694	0.10763	0.97042	0.11349	0.96797
0.10858	0.98694	0.10873	0.97042	0.11419	0.96792
0.10887	0.98694	0.10685	0.97042	0.11381	0.96792
0.10908	0.98694	0.10685	0.97037	0.11387	0.96792
0.10145	0.98689	0.10847	0.97037	0.11336	0.96792
0.10667	0.98689	0.10649	0.97037	0.11349	0.96792
0.10784	0.98689	0.10677	0.97037	0.11327	0.96787
0.10761	0.98689	0.10789	0.97037	0.11369	0.96787
0.10698	0.98689	0.1069	0.97033	0.11294	0.96787
0.10831	0.98685	0.10851	0.97033	0.11349	0.96787
0.1069	0.98685	0.108	0.97033	0.11401	0.96787
0.1074	0.98685	0.10795	0.97033	0.11455	0.96783
0.10798	0.98685	0.10814	0.97033	0.11532	0.96783
0.10896	0.98685	0.1083	0.97028	0.11381	0.96783
0.1199	0.98681	0.10842	0.97028	0.11404	0.96783
0.10782	0.98681	0.10662	0.97028	0.11369	0.96783
0.10863	0.98681	0.10896	0.97028	0.11522	0.96778
0.10955	0.98681	0.10842	0.97024	0.11488	0.96778
0.11025	0.98681	0.10621	0.97024	0.11513	0.96778
0.1074	0.98676	0.10736	0.97024	0.11442	0.96778
0.10917	0.98676	0.10741	0.97024	0.11485	0.96774
0.10885	0.98676	0.10681	0.97024	0.11432	0.96774
0.10947	0.98676	0.09656	0.9702	0.11431	0.96774
0.1095	0.98676	0.10625	0.9702	0.11422	0.96774
0.10768	0.98672	0.10644	0.9702	0.11432	0.96774
0.10859	0.98672	0.10616	0.9702	0.11501	0.96769
0.10759	0.98672	0.10549	0.9702	0.11487	0.96769
0.108	0.98672	0.10508	0.97015	0.11417	0.96769
0.10882	0.98672	0.10498	0.97015	0.11327	0.96769
0.10901	0.98667	0.10537	0.97015	0.11441	0.96769
0.10764	0.98667	0.1053	0.97015	0.11363	0.96765
0.10886	0.98667	0.10563	0.97015	0.11501	0.96765
0.10768	0.98667	0.11511	0.97011	0.1158	0.96765
0.11841	0.98663	0.10373	0.97011	0.11423	0.96765
0.10909	0.98663	0.10484	0.97011	0.11476	0.96765
0.10959	0.98663	0.10507	0.97011	0.11478	0.9676
0.10918	0.98663	0.10531	0.97011	0.11524	0.9676
0.1095	0.98663	0.10607	0.97006	0.11534	0.9676
0.10882	0.98663	0.10503	0.97006	0.11555	0.9676
0.10983	0.98659	0.10579	0.97006	0.11441	0.96755
0.10937	0.98659	0.10489	0.97006	0.11459	0.96755
0.10886	0.98659	0.09354	0.97002	0.11464	0.96755
0.1095	0.98659	0.10382	0.97002	0.11628	0.96755
0.10306	0.98654	0.1047	0.97002	0.11601	0.96755
0.10873	0.98654	0.10479	0.97002	0.11395	0.96751
0.10877	0.98654	0.10388	0.97002	0.11478	0.96751
0.10955	0.98654	0.10443	0.96998	0.11492	0.96751
0.10873	0.98654	0.10521	0.96998	0.11456	0.96751
0.10885	0.9865	0.10479	0.96998	0.11531	0.96751
0.10867	0.9865	0.1054	0.96998	0.11394	0.96746
0.11011	0.9865	0.10512	0.96998	0.11451	0.96746
0.10904	0.9865	0.10576	0.96993	0.11331	0.96746
0.10978	0.9865	0.10652	0.96993	0.11354	0.96746
0.11362	0.98645	0.10576	0.96993	0.11536	0.96742
0.11115	0.98645	0.10593	0.96993	0.11381	0.96742
0.11066	0.98645	0.10471	0.96993	0.11324	0.96742
0.11247	0.98645	0.10494	0.96989	0.11445	0.96742
0.1111	0.98641	0.1047	0.96989	0.11377	0.96742
0.11151	0.98641	0.10528	0.96989	0.11473	0.96742
0.11206	0.98641	0.10489	0.96989	0.11312	0.96737
0.11151	0.98641	0.10402	0.96989	0.11377	0.96737
0.11164	0.98641	0.10443	0.96984	0.11404	0.96737
0.10182	0.98637	0.10434	0.96984	0.11327	0.96737
0.11179	0.98637	0.10425	0.96984	0.11231	0.96732
0.11201	0.98637	0.10499	0.96984	0.11308	0.96732
0.11234	0.98637	0.10508	0.96984	0.11239	0.96732
0.11133	0.98637	0.10415	0.9698	0.11332	0.96732
0.11211	0.98632	0.10401	0.9698	0.11239	0.96732
0.11215	0.98632	0.10537	0.9698	0.11257	0.96728
0.11216	0.98632	0.10499	0.9698	0.11243	0.96728
0.11303	0.98632	0.10489	0.9698	0.11199	0.96728
0.11408	0.98632	0.10772	0.96975	0.11282	0.96728
0.1241	0.98628	0.106	0.96975	0.11382	0.96723
0.11463	0.98628	0.10721	0.96975	0.11299	0.96723
0.11408	0.98628	0.10708	0.96975	0.11349	0.96723
0.11418	0.98628	0.10686	0.96971	0.11413	0.96723
0.11516	0.98628	0.10671	0.96971	0.1125	0.96723
0.11471	0.98624	0.10676	0.96971	0.11354	0.96719
0.11395	0.98624	0.10736	0.96971	0.11446	0.96719
0.11518	0.98624	0.10616	0.96971	0.11468	0.96719
0.1138	0.98624	0.09735	0.96967	0.11433	0.96719
0.10576	0.98619	0.10438	0.96967	0.11313	0.96719
0.1143	0.98619	0.10461	0.96967	0.11405	0.96714
0.11499	0.98619	0.10567	0.96967	0.11524	0.96714
0.11413	0.98619	0.10646	0.96967	0.11468	0.96714
0.11502	0.98619	0.10545	0.96962	0.1155	0.96714
0.11261	0.98615	0.1062	0.96962	0.11381	0.96714
0.11431	0.98615	0.10658	0.96962	0.11387	0.96709
0.11444	0.98615	0.10694	0.96962	0.11369	0.96709
0.11562	0.98615	0.10558	0.96962	0.11409	0.96709
0.11499	0.98615	0.10845	0.96958	0.11566	0.96709
0.12433	0.9861	0.10753	0.96958	0.11596	0.96705
0.11542	0.9861	0.10676	0.96958	0.11614	0.96705
0.11564	0.9861	0.10931	0.96958	0.11571	0.96705
0.11586	0.9861	0.10835	0.96953	0.11646	0.96705
0.116	0.98606	0.108	0.96953	0.11661	0.96705
0.11564	0.98606	0.10909	0.96953	0.11619	0.967
0.11581	0.98606	0.10812	0.96953	0.11615	0.967
0.11655	0.98606	0.10876	0.96953	0.11697	0.967
0.11705	0.98606	0.10136	0.96949	0.1173	0.967
0.10851	0.98602	0.10823	0.96949	0.11702	0.967
0.11495	0.98602	0.1075	0.96949	0.1167	0.96696
0.1164	0.98602	0.10731	0.96949	0.11623	0.96696
0.1155	0.98602	0.10735	0.96949	0.11715	0.96696
0.11669	0.98602	0.10761	0.96945	0.11783	0.96696
0.1165	0.98597	0.10809	0.96945	0.11771	0.96696
0.11518	0.98597	0.10816	0.96945	0.11771	0.96691
0.11518	0.98597	0.10769	0.96945	0.11794	0.96691
0.11585	0.98597	0.10909	0.96945	0.11908	0.96691
0.11527	0.98597	0.11047	0.9694	0.11871	0.96691
0.12501	0.98593	0.11064	0.9694	0.11994	0.96691
0.11612	0.98593	0.10993	0.9694	0.11963	0.96687
0.11516	0.98593	0.11029	0.9694	0.11911	0.96687
0.11635	0.98593	0.11006	0.9694	0.11972	0.96687
0.11519	0.98588	0.11087	0.96936	0.11935	0.96687
0.11558	0.98588	0.1104	0.96936	0.12045	0.96687
0.11592	0.98588	0.10973	0.96936	0.1209	0.96682
0.11595	0.98588	0.10969	0.96936	0.11996	0.96682
0.115	0.98588	0.11002	0.96936	0.12115	0.96682
0.11613	0.98588	0.10816	0.96931	0.12045	0.96682
0.11514	0.98584	0.1081	0.96931	0.12055	0.96682
0.11471	0.98584	0.10879	0.96931	0.12055	0.96677
0.11395	0.98584	0.10908	0.96931	0.12055	0.96677
0.11366	0.98584	0.10891	0.96931	0.12032	0.96677
0.11499	0.98584	0.10847	0.96927	0.12083	0.96677
0.11418	0.9858	0.10923	0.96927	0.12293	0.96677
0.11435	0.9858	0.1096	0.96927	0.12108	0.96673
0.11399	0.9858	0.10807	0.96927	0.12154	0.96673
0.11436	0.9858	0.11138	0.96923	0.12182	0.96673
0.1266	0.98575	0.11106	0.96923	0.12196	0.96673
0.11632	0.98575	0.10996	0.96923	0.12274	0.96668
0.11603	0.98575	0.11119	0.96923	0.12145	0.96668
0.11581	0.98575	0.11091	0.96923	0.122	0.96668
0.11353	0.98571	0.10996	0.96918	0.12424	0.96668
0.11525	0.98571	0.10988	0.96918	0.12315	0.96668
0.11578	0.98571	0.11048	0.96918	0.12279	0.96664
0.11627	0.98571	0.1108	0.96918	0.1221	0.96664
0.11532	0.98571	0.11005	0.96918	0.12237	0.96664
0.11608	0.98571	0.10969	0.96914	0.12353	0.96664
0.10396	0.98567	0.1096	0.96914	0.1226	0.96664
0.11339	0.98567	0.1095	0.96914	0.12283	0.96659
0.11407	0.98567	0.10951	0.96914	0.12324	0.96659
0.11353	0.98567	0.11106	0.96914	0.12307	0.96659
0.11477	0.98567	0.11008	0.96909	0.1229	0.96659
0.11481	0.98562	0.10992	0.96909	0.12332	0.96659
0.11536	0.98562	0.10928	0.96909	0.12301	0.96654
0.11565	0.98562	0.10964	0.96909	0.12466	0.96654
0.11331	0.98562	0.11068	0.96909	0.12401	0.96654
0.11947	0.98558	0.11043	0.96905	0.12296	0.96654
0.11733	0.98558	0.11143	0.96905	0.12387	0.96654
0.11595	0.98558	0.1104	0.96905	0.12297	0.9665
0.11714	0.98558	0.11151	0.96905	0.12298	0.9665
0.11658	0.98558	0.11096	0.96901	0.12343	0.9665
0.11641	0.98553	0.10973	0.96901	0.12292	0.9665
0.11681	0.98553	0.10983	0.96901	0.12352	0.96645
0.11544	0.98553	0.10936	0.96901	0.12443	0.96645
0.1159	0.98553	0.11016	0.96901	0.12279	0.96645
0.10959	0.98549	0.10327	0.96896	0.12375	0.96645
0.11528	0.98549	0.10955	0.96896	0.12259	0.96645
0.11509	0.98549	0.10893	0.96896	0.12237	0.96641
0.11539	0.98549	0.10964	0.96896	0.12182	0.96641
0.11678	0.98549	0.11019	0.96896	0.12251	0.96641
0.11635	0.98549	0.10968	0.96892	0.12348	0.96641
0.11594	0.98545	0.11002	0.96892	0.1232	0.96641
0.1156	0.98545	0.10983	0.96892	0.12241	0.96636
0.11742	0.98545	0.11064	0.96892	0.12279	0.96636
0.11737	0.98545	0.10992	0.96892	0.12201	0.96636
0.12629	0.9854	0.11216	0.96887	0.12348	0.96636
0.11747	0.9854	0.11106	0.96887	0.12296	0.96636
0.11798	0.9854	0.11124	0.96887	0.12218	0.96632
0.1171	0.9854	0.11101	0.96887	0.12261	0.96632
0.11695	0.9854	0.1111	0.96887	0.12284	0.96632
0.11811	0.98536	0.11048	0.96883	0.12283	0.96632
0.11727	0.98536	0.11157	0.96883	0.12269	0.96627
0.11742	0.98536	0.11141	0.96883	0.12324	0.96627
0.11865	0.98536	0.11123	0.96883	0.12265	0.96627
0.11805	0.98536	0.10309	0.96879	0.12376	0.96627
0.11649	0.98531	0.11033	0.96879	0.12424	0.96627
0.1172	0.98531	0.11054	0.96879	0.12406	0.96622
0.11706	0.98531	0.1117	0.96879	0.12348	0.96622
0.11604	0.98531	0.11087	0.96879	0.12279	0.96622
0.11719	0.98527	0.11061	0.96874	0.1239	0.96622
0.11791	0.98527	0.1122	0.96874	0.12375	0.96622
0.11772	0.98527	0.11087	0.96874	0.12411	0.96618
0.11819	0.98527	0.11132	0.96874	0.1233	0.96618
0.11844	0.98527	0.11264	0.96874	0.12403	0.96618
0.12652	0.98523	0.11325	0.9687	0.12389	0.96618
0.11784	0.98523	0.11148	0.9687	0.12544	0.96618
0.11833	0.98523	0.11339	0.9687	0.12318	0.96613
0.11797	0.98523	0.11138	0.9687	0.12438	0.96613
0.11905	0.98523	0.1123	0.9687	0.12488	0.96613
0.11812	0.98518	0.11217	0.96865	0.12411	0.96613
0.11802	0.98518	0.11261	0.96865	0.12489	0.96613
0.11821	0.98518	0.11281	0.96865	0.12488	0.96609
0.11892	0.98518	0.11235	0.96865	0.12483	0.96609
0.11846	0.98518	0.102	0.96861	0.12468	0.96609
0.11809	0.98514	0.11106	0.96861	0.12359	0.96609
0.11718	0.98514	0.11134	0.96861	0.12425	0.96604
0.11766	0.98514	0.11211	0.96861	0.12494	0.96604
0.11761	0.98514	0.11179	0.96861	0.12419	0.96604
0.11741	0.98514	0.11285	0.96857	0.12474	0.96604
0.1187	0.98509	0.11325	0.96857	0.12387	0.96604
0.11821	0.98509	0.11198	0.96857	0.12484	0.96599
0.11779	0.98509	0.11138	0.96857	0.12636	0.96599
0.11809	0.98509	0.11229	0.96857	0.12606	0.96599
0.12679	0.98505	0.11588	0.96852	0.12544	0.96599
0.12042	0.98505	0.11361	0.96852	0.12433	0.96599
0.11861	0.98505	0.1143	0.96852	0.12671	0.96595
0.11934	0.98505	0.11457	0.96852	0.12484	0.96595
0.11856	0.98505	0.11334	0.96852	0.12589	0.96595
0.11915	0.98505	0.11395	0.96848	0.12563	0.96595
0.1172	0.98501	0.11421	0.96848	0.12581	0.96595
0.11732	0.98501	0.11325	0.96848	0.12645	0.9659
0.11749	0.98501	0.11422	0.96848	0.12636	0.9659
0.11883	0.98501	0.11435	0.96848	0.12608	0.9659
0.11855	0.98501	0.11235	0.96843	0.12497	0.9659
0.1122	0.98496	0.11339	0.96843	0.1253	0.96586
0.11681	0.98496	0.1128	0.96843	0.12567	0.96586
0.11687	0.98496	0.11311	0.96843	0.12534	0.96586
0.11706	0.98496	0.11216	0.96843	0.12684	0.96586
0.11606	0.98496	0.11292	0.96839	0.12589	0.96586
0.11674	0.98496	0.11188	0.96839	0.12544	0.96581
0.11645	0.98492	0.11289	0.96839	0.12571	0.96581
0.11763	0.98492	0.11389	0.96839	0.12673	0.96581
0.11807	0.98492	0.11979	0.96835	0.12489	0.96581
0.11682	0.98492	0.11471	0.96835	0.12563	0.96581
0.11691	0.98492	0.11504	0.96835	0.12639	0.96576
0.11819	0.98492	0.11525	0.96835	0.12553	0.96576
0.11827	0.98488	0.11516	0.96835	0.12623	0.96576
0.1193	0.98488	0.1164	0.9683	0.12617	0.96576
0.12047	0.98488	0.11544	0.9683	0.12595	0.96576
0.11982	0.98488	0.1162	0.9683	0.1269	0.96572
0.11856	0.98488	0.11523	0.9683	0.12659	0.96572
0.11907	0.98483	0.11532	0.9683	0.12687	0.96572
0.11953	0.98483	0.11379	0.96826	0.12655	0.96572
0.11874	0.98483	0.11417	0.96826	0.12655	0.96567
0.11989	0.98483	0.11481	0.96826	0.12707	0.96567
0.1198	0.98483	0.11516	0.96826	0.12791	0.96567
0.11912	0.98483	0.11518	0.96826	0.12548	0.96567
0.11892	0.98479	0.11569	0.96821	0.12636	0.96567
[truncated: 10,096 more rows]

## Sheet: pH = 7，Stress-compation
Stress	SP5-10(3)	Stress	SP10-15(3)	Stress	SP15-20(3)
[truncated: 10,675 more rows]
