# Supplementary material for: Compression of Aggregates of Acid‐Leached Coal Gangues: Implications for Coal Mine Backfill
Source: Hindawi journal article supplement (doi:10.1155/2018/7056430), 2018-01-01
Supplement: f1 [file 7056430.f1.zip › 7056430.f1/3 Data of figure 6.xlsx]

## Sheet: 5-10mm，Stress-Strain 
Stress	SP5-10(3)	Stress	SP5-10(5)	Stress	SP5-10(7)
0	0	0	0	0	0
0.10068	0.02312	0.10068	0.01292	0.10068	0.00112
0.10078	0.02317	0.10078	0.01297	0.10078	0.00117
0.10149	0.02317	0.10149	0.01297	0.10149	0.00117
0.10094	0.02317	0.10094	0.01297	0.10094	0.00117
0.10103	0.02317	0.10103	0.01297	0.10103	0.00117
0.10164	0.02317	0.10164	0.01297	0.10164	0.00117
0.1009	0.02321	0.1009	0.01301	0.1009	0.00121
0.10127	0.02321	0.10127	0.01301	0.10127	0.00121
0.1021	0.02321	0.1021	0.01301	0.1021	0.00121
0.0998	0.02321	0.0998	0.01301	0.0998	0.00121
0.10085	0.02321	0.10085	0.01301	0.10085	0.00121
0.10018	0.02325	0.10018	0.01305	0.10018	0.00125
0.10025	0.02325	0.10025	0.01305	0.10025	0.00125
0.1019	0.02325	0.1019	0.01305	0.1019	0.00125
0.10076	0.02325	0.10076	0.01305	0.10076	0.00125
0.10152	0.0233	0.10152	0.0131	0.10152	0.0013
0.1008	0.0233	0.1008	0.0131	0.1008	0.0013
0.10181	0.0233	0.10181	0.0131	0.10181	0.0013
0.10374	0.0233	0.10374	0.0131	0.10374	0.0013
0.10281	0.0233	0.10281	0.0131	0.10281	0.0013
0.11005	0.02334	0.11005	0.01314	0.11005	0.00134
0.10283	0.02334	0.10283	0.01314	0.10283	0.00134
0.10385	0.02334	0.10385	0.01314	0.10385	0.00134
0.10287	0.02334	0.10287	0.01314	0.10287	0.00134
0.10355	0.02334	0.10355	0.01314	0.10355	0.00134
0.10255	0.02339	0.10255	0.01319	0.10255	0.00139
0.10301	0.02339	0.10301	0.01319	0.10301	0.00139
0.10247	0.02339	0.10247	0.01319	0.10247	0.00139
0.10269	0.02339	0.10269	0.01319	0.10269	0.00139
0.10224	0.02339	0.10224	0.01319	0.10224	0.00139
0.09282	0.02343	0.09282	0.01323	0.09282	0.00143
0.10261	0.02343	0.10261	0.01323	0.10261	0.00143
0.10309	0.02343	0.10309	0.01323	0.10309	0.00143
0.10187	0.02343	0.10187	0.01323	0.10187	0.00143
0.10159	0.02343	0.10159	0.01323	0.10159	0.00143
0.10323	0.02347	0.10323	0.01327	0.10323	0.00147
0.10311	0.02347	0.10311	0.01327	0.10311	0.00147
0.10261	0.02347	0.10261	0.01327	0.10261	0.00147
0.10346	0.02347	0.10346	0.01327	0.10346	0.00147
0.10267	0.02347	0.10267	0.01327	0.10267	0.00147
0.1027	0.02352	0.1027	0.01332	0.1027	0.00152
0.10374	0.02352	0.10374	0.01332	0.10374	0.00152
0.10498	0.02352	0.10498	0.01332	0.10498	0.00152
0.10475	0.02352	0.10475	0.01332	0.10475	0.00152
0.10507	0.02356	0.10507	0.01336	0.10507	0.00156
0.10474	0.02356	0.10474	0.01336	0.10474	0.00156
0.10568	0.02356	0.10568	0.01336	0.10568	0.00156
0.10411	0.02356	0.10411	0.01336	0.10411	0.00156
0.1043	0.02356	0.1043	0.01336	0.1043	0.00156
0.09589	0.0236	0.09589	0.0134	0.09589	0.0016
0.10438	0.0236	0.10438	0.0134	0.10438	0.0016
0.10385	0.0236	0.10385	0.0134	0.10385	0.0016
0.10401	0.0236	0.10401	0.0134	0.10401	0.0016
0.10298	0.0236	0.10298	0.0134	0.10298	0.0016
0.10321	0.02365	0.10321	0.01345	0.10321	0.00165
0.10448	0.02365	0.10448	0.01345	0.10448	0.00165
0.1032	0.02365	0.1032	0.01345	0.1032	0.00165
0.10401	0.02365	0.10401	0.01345	0.10401	0.00165
0.1105	0.02369	0.1105	0.01349	0.1105	0.00169
0.10539	0.02369	0.10539	0.01349	0.10539	0.00169
0.10484	0.02369	0.10484	0.01349	0.10484	0.00169
0.10503	0.02369	0.10503	0.01349	0.10503	0.00169
0.1047	0.02369	0.1047	0.01349	0.1047	0.00169
0.10428	0.02374	0.10428	0.01354	0.10428	0.00174
0.10437	0.02374	0.10437	0.01354	0.10437	0.00174
0.10415	0.02374	0.10415	0.01354	0.10415	0.00174
0.10337	0.02374	0.10337	0.01354	0.10337	0.00174
0.10425	0.02374	0.10425	0.01354	0.10425	0.00174
0.0984	0.02378	0.0984	0.01358	0.0984	0.00178
0.10306	0.02378	0.10306	0.01358	0.10306	0.00178
0.10275	0.02378	0.10275	0.01358	0.10275	0.00178
0.10399	0.02378	0.10399	0.01358	0.10399	0.00178
0.10302	0.02378	0.10302	0.01358	0.10302	0.00178
0.10429	0.02382	0.10429	0.01362	0.10429	0.00182
0.1032	0.02382	0.1032	0.01362	0.1032	0.00182
0.10419	0.02382	0.10419	0.01362	0.10419	0.00182
0.10318	0.02382	0.10318	0.01362	0.10318	0.00182
0.10369	0.02382	0.10369	0.01362	0.10369	0.00182
0.10795	0.02387	0.10795	0.01367	0.10795	0.00187
0.10553	0.02387	0.10553	0.01367	0.10553	0.00187
0.10611	0.02387	0.10611	0.01367	0.10611	0.00187
0.10558	0.02387	0.10558	0.01367	0.10558	0.00187
0.10452	0.02387	0.10452	0.01367	0.10452	0.00187
0.10662	0.02391	0.10662	0.01371	0.10662	0.00191
0.10583	0.02391	0.10583	0.01371	0.10583	0.00191
0.1057	0.02391	0.1057	0.01371	0.1057	0.00191
0.10451	0.02391	0.10451	0.01371	0.10451	0.00191
0.10545	0.02391	0.10545	0.01371	0.10545	0.00191
0.1047	0.02396	0.1047	0.01376	0.1047	0.00196
0.10516	0.02396	0.10516	0.01376	0.10516	0.00196
0.10502	0.02396	0.10502	0.01376	0.10502	0.00196
0.1048	0.02396	0.1048	0.01376	0.1048	0.00196
0.10434	0.02396	0.10434	0.01376	0.10434	0.00196
0.10542	0.024	0.10542	0.0138	0.10542	0.002
0.10429	0.024	0.10429	0.0138	0.10429	0.002
0.10531	0.024	0.10531	0.0138	0.10531	0.002
0.10558	0.024	0.10558	0.0138	0.10558	0.002
0.11435	0.02404	0.11435	0.01384	0.11435	0.00204
0.10731	0.02404	0.10731	0.01384	0.10731	0.00204
0.10736	0.02404	0.10736	0.01384	0.10736	0.00204
0.10698	0.02404	0.10698	0.01384	0.10698	0.00204
0.10693	0.02404	0.10693	0.01384	0.10693	0.00204
0.10479	0.02409	0.10479	0.01389	0.10479	0.00209
0.10563	0.02409	0.10563	0.01389	0.10563	0.00209
0.1063	0.02409	0.1063	0.01389	0.1063	0.00209
0.10759	0.02409	0.10759	0.01389	0.10759	0.00209
0.10383	0.02413	0.10383	0.01393	0.10383	0.00213
0.10447	0.02413	0.10447	0.01393	0.10447	0.00213
0.106	0.02413	0.106	0.01393	0.106	0.00213
0.10514	0.02413	0.10514	0.01393	0.10514	0.00213
0.10511	0.02413	0.10511	0.01393	0.10511	0.00213
0.10707	0.02413	0.10707	0.01393	0.10707	0.00213
0.10662	0.02417	0.10662	0.01398	0.10662	0.00217
0.10662	0.02417	0.10662	0.01398	0.10662	0.00217
0.10708	0.02417	0.10708	0.01398	0.10708	0.00217
0.10662	0.02417	0.10662	0.01398	0.10662	0.00217
0.10867	0.02417	0.10867	0.01398	0.10867	0.00217
0.10876	0.02422	0.10876	0.01402	0.10876	0.00222
0.108	0.02422	0.108	0.01402	0.108	0.00222
0.10795	0.02422	0.10795	0.01402	0.10795	0.00222
0.10876	0.02422	0.10876	0.01402	0.10876	0.00222
0.10881	0.02426	0.10881	0.01406	0.10881	0.00226
0.10845	0.02426	0.10845	0.01406	0.10845	0.00226
0.10858	0.02426	0.10858	0.01406	0.10858	0.00226
0.10887	0.02426	0.10887	0.01406	0.10887	0.00226
0.10908	0.02426	0.10908	0.01406	0.10908	0.00226
0.10145	0.02431	0.10145	0.01411	0.10145	0.00231
0.10667	0.02431	0.10667	0.01411	0.10667	0.00231
0.10784	0.02431	0.10784	0.01411	0.10784	0.00231
0.10761	0.02431	0.10761	0.01411	0.10761	0.00231
0.10698	0.02431	0.10698	0.01411	0.10698	0.00231
0.10831	0.02435	0.10831	0.01415	0.10831	0.00235
0.1069	0.02435	0.1069	0.01415	0.1069	0.00235
0.1074	0.02435	0.1074	0.01415	0.1074	0.00235
0.10798	0.02435	0.10798	0.01415	0.10798	0.00235
0.10896	0.02435	0.10896	0.01415	0.10896	0.00235
0.1199	0.02439	0.1199	0.01419	0.1199	0.00239
0.10782	0.02439	0.10782	0.01419	0.10782	0.00239
0.10863	0.02439	0.10863	0.01419	0.10863	0.00239
0.10955	0.02439	0.10955	0.01419	0.10955	0.00239
0.11025	0.02439	0.11025	0.01419	0.11025	0.00239
0.1074	0.02444	0.1074	0.01424	0.1074	0.00244
0.10917	0.02444	0.10917	0.01424	0.10917	0.00244
0.10885	0.02444	0.10885	0.01424	0.10885	0.00244
0.10947	0.02444	0.10947	0.01424	0.10947	0.00244
0.1095	0.02444	0.1095	0.01424	0.1095	0.00244
0.10768	0.02448	0.10768	0.01428	0.10768	0.00248
0.10859	0.02448	0.10859	0.01428	0.10859	0.00248
0.10759	0.02448	0.10759	0.01428	0.10759	0.00248
0.108	0.02448	0.108	0.01428	0.108	0.00248
0.10882	0.02448	0.10882	0.01428	0.10882	0.00248
0.10901	0.02453	0.10901	0.01433	0.10901	0.00253
0.10764	0.02453	0.10764	0.01433	0.10764	0.00253
0.10886	0.02453	0.10886	0.01433	0.10886	0.00253
0.10768	0.02453	0.10768	0.01433	0.10768	0.00253
0.11841	0.02457	0.11841	0.01437	0.11841	0.00257
0.10909	0.02457	0.10909	0.01437	0.10909	0.00257
0.10959	0.02457	0.10959	0.01437	0.10959	0.00257
0.10918	0.02457	0.10918	0.01437	0.10918	0.00257
0.1095	0.02457	0.1095	0.01437	0.1095	0.00257
0.10882	0.02457	0.10882	0.01437	0.10882	0.00257
0.10983	0.02461	0.10983	0.01441	0.10983	0.00261
0.10937	0.02461	0.10937	0.01441	0.10937	0.00261
0.10886	0.02461	0.10886	0.01441	0.10886	0.00261
0.1095	0.02461	0.1095	0.01441	0.1095	0.00261
0.10306	0.02466	0.10306	0.01446	0.10306	0.00266
0.10873	0.02466	0.10873	0.01446	0.10873	0.00266
0.10877	0.02466	0.10877	0.01446	0.10877	0.00266
0.10955	0.02466	0.10955	0.01446	0.10955	0.00266
0.10873	0.02466	0.10873	0.01446	0.10873	0.00266
0.10885	0.0247	0.10885	0.0145	0.10885	0.0027
0.10867	0.0247	0.10867	0.0145	0.10867	0.0027
0.11011	0.0247	0.11011	0.0145	0.11011	0.0027
0.10904	0.0247	0.10904	0.0145	0.10904	0.0027
0.10978	0.0247	0.10978	0.0145	0.10978	0.0027
0.11362	0.02475	0.11362	0.01455	0.11362	0.00275
0.11115	0.02475	0.11115	0.01455	0.11115	0.00275
0.11066	0.02475	0.11066	0.01455	0.11066	0.00275
0.11247	0.02475	0.11247	0.01455	0.11247	0.00275
0.1111	0.02479	0.1111	0.01459	0.1111	0.00279
0.11151	0.02479	0.11151	0.01459	0.11151	0.00279
0.11206	0.02479	0.11206	0.01459	0.11206	0.00279
0.11151	0.02479	0.11151	0.01459	0.11151	0.00279
0.11164	0.02479	0.11164	0.01459	0.11164	0.00279
0.10182	0.02483	0.10182	0.01463	0.10182	0.00283
0.11179	0.02483	0.11179	0.01463	0.11179	0.00283
0.11201	0.02483	0.11201	0.01463	0.11201	0.00283
0.11234	0.02483	0.11234	0.01463	0.11234	0.00283
0.11133	0.02483	0.11133	0.01463	0.11133	0.00283
0.11211	0.02488	0.11211	0.01468	0.11211	0.00288
0.11215	0.02488	0.11215	0.01468	0.11215	0.00288
0.11216	0.02488	0.11216	0.01468	0.11216	0.00288
0.11303	0.02488	0.11303	0.01468	0.11303	0.00288
0.11408	0.02488	0.11408	0.01468	0.11408	0.00288
0.1241	0.02492	0.1241	0.01472	0.1241	0.00292
0.11463	0.02492	0.11463	0.01472	0.11463	0.00292
0.11408	0.02492	0.11408	0.01472	0.11408	0.00292
0.11418	0.02492	0.11418	0.01472	0.11418	0.00292
0.11516	0.02492	0.11516	0.01472	0.11516	0.00292
0.11471	0.02496	0.11471	0.01476	0.11471	0.00296
0.11395	0.02496	0.11395	0.01476	0.11395	0.00296
0.11518	0.02496	0.11518	0.01476	0.11518	0.00296
0.1138	0.02496	0.1138	0.01476	0.1138	0.00296
0.10576	0.02501	0.10576	0.01481	0.10576	0.00301
0.1143	0.02501	0.1143	0.01481	0.1143	0.00301
0.11499	0.02501	0.11499	0.01481	0.11499	0.00301
0.11413	0.02501	0.11413	0.01481	0.11413	0.00301
0.11502	0.02501	0.11502	0.01481	0.11502	0.00301
0.11261	0.02505	0.11261	0.01485	0.11261	0.00305
0.11431	0.02505	0.11431	0.01485	0.11431	0.00305
0.11444	0.02505	0.11444	0.01485	0.11444	0.00305
0.11562	0.02505	0.11562	0.01485	0.11562	0.00305
0.11499	0.02505	0.11499	0.01485	0.11499	0.00305
0.12433	0.0251	0.12433	0.0149	0.12433	0.0031
0.11542	0.0251	0.11542	0.0149	0.11542	0.0031
0.11564	0.0251	0.11564	0.0149	0.11564	0.0031
0.11586	0.0251	0.11586	0.0149	0.11586	0.0031
0.116	0.02514	0.116	0.01494	0.116	0.00314
0.11564	0.02514	0.11564	0.01494	0.11564	0.00314
0.11581	0.02514	0.11581	0.01494	0.11581	0.00314
0.11655	0.02514	0.11655	0.01494	0.11655	0.00314
0.11705	0.02514	0.11705	0.01494	0.11705	0.00314
0.10851	0.02518	0.10851	0.01498	0.10851	0.00318
0.11495	0.02518	0.11495	0.01498	0.11495	0.00318
0.1164	0.02518	0.1164	0.01498	0.1164	0.00318
0.1155	0.02518	0.1155	0.01498	0.1155	0.00318
0.11669	0.02518	0.11669	0.01498	0.11669	0.00318
0.1165	0.02523	0.1165	0.01503	0.1165	0.00323
0.11518	0.02523	0.11518	0.01503	0.11518	0.00323
0.11518	0.02523	0.11518	0.01503	0.11518	0.00323
0.11585	0.02523	0.11585	0.01503	0.11585	0.00323
0.11527	0.02523	0.11527	0.01503	0.11527	0.00323
0.12501	0.02527	0.12501	0.01507	0.12501	0.00327
0.11612	0.02527	0.11612	0.01507	0.11612	0.00327
0.11516	0.02527	0.11516	0.01507	0.11516	0.00327
0.11635	0.02527	0.11635	0.01507	0.11635	0.00327
0.11519	0.02532	0.11519	0.01512	0.11519	0.00332
0.11558	0.02532	0.11558	0.01512	0.11558	0.00332
0.11592	0.02532	0.11592	0.01512	0.11592	0.00332
0.11595	0.02532	0.11595	0.01512	0.11595	0.00332
0.115	0.02532	0.115	0.01512	0.115	0.00332
0.11613	0.02532	0.11613	0.01512	0.11613	0.00332
0.11514	0.02536	0.11514	0.01516	0.11514	0.00336
0.11471	0.02536	0.11471	0.01516	0.11471	0.00336
0.11395	0.02536	0.11395	0.01516	0.11395	0.00336
0.11366	0.02536	0.11366	0.01516	0.11366	0.00336
0.11499	0.02536	0.11499	0.01516	0.11499	0.00336
0.11418	0.0254	0.11418	0.0152	0.11418	0.0034
0.11435	0.0254	0.11435	0.0152	0.11435	0.0034
0.11399	0.0254	0.11399	0.0152	0.11399	0.0034
0.11436	0.0254	0.11436	0.0152	0.11436	0.0034
0.1266	0.02545	0.1266	0.01525	0.1266	0.00345
0.11632	0.02545	0.11632	0.01525	0.11632	0.00345
0.11603	0.02545	0.11603	0.01525	0.11603	0.00345
0.11581	0.02545	0.11581	0.01525	0.11581	0.00345
0.11353	0.02549	0.11353	0.01529	0.11353	0.00349
0.11525	0.02549	0.11525	0.01529	0.11525	0.00349
0.11578	0.02549	0.11578	0.01529	0.11578	0.00349
0.11627	0.02549	0.11627	0.01529	0.11627	0.00349
0.11532	0.02549	0.11532	0.01529	0.11532	0.00349
0.11608	0.02549	0.11608	0.01529	0.11608	0.00349
0.10396	0.02553	0.10396	0.01533	0.10396	0.00353
0.11339	0.02553	0.11339	0.01533	0.11339	0.00353
0.11407	0.02553	0.11407	0.01533	0.11407	0.00353
0.11353	0.02553	0.11353	0.01533	0.11353	0.00353
0.11477	0.02553	0.11477	0.01533	0.11477	0.00353
0.11481	0.02558	0.11481	0.01538	0.11481	0.00358
0.11536	0.02558	0.11536	0.01538	0.11536	0.00358
0.11565	0.02558	0.11565	0.01538	0.11565	0.00358
0.11331	0.02558	0.11331	0.01538	0.11331	0.00358
0.11947	0.02562	0.11947	0.01542	0.11947	0.00362
0.11733	0.02562	0.11733	0.01542	0.11733	0.00362
0.11595	0.02562	0.11595	0.01542	0.11595	0.00362
0.11714	0.02562	0.11714	0.01542	0.11714	0.00362
0.11658	0.02562	0.11658	0.01542	0.11658	0.00362
0.11641	0.02567	0.11641	0.01547	0.11641	0.00367
0.11681	0.02567	0.11681	0.01547	0.11681	0.00367
0.11544	0.02567	0.11544	0.01547	0.11544	0.00367
0.1159	0.02567	0.1159	0.01547	0.1159	0.00367
0.10959	0.02571	0.10959	0.01551	0.10959	0.00371
0.11528	0.02571	0.11528	0.01551	0.11528	0.00371
0.11509	0.02571	0.11509	0.01551	0.11509	0.00371
0.11539	0.02571	0.11539	0.01551	0.11539	0.00371
0.11678	0.02571	0.11678	0.01551	0.11678	0.00371
0.11635	0.02571	0.11635	0.01551	0.11635	0.00371
0.11594	0.02575	0.11594	0.01555	0.11594	0.00375
0.1156	0.02575	0.1156	0.01555	0.1156	0.00375
0.11742	0.02575	0.11742	0.01555	0.11742	0.00375
0.11737	0.02575	0.11737	0.01555	0.11737	0.00375
0.12629	0.0258	0.12629	0.0156	0.12629	0.0038
0.11747	0.0258	0.11747	0.0156	0.11747	0.0038
0.11798	0.0258	0.11798	0.0156	0.11798	0.0038
0.1171	0.0258	0.1171	0.0156	0.1171	0.0038
0.11695	0.0258	0.11695	0.0156	0.11695	0.0038
0.11811	0.02584	0.11811	0.01564	0.11811	0.00384
0.11727	0.02584	0.11727	0.01564	0.11727	0.00384
0.11742	0.02584	0.11742	0.01564	0.11742	0.00384
0.11865	0.02584	0.11865	0.01564	0.11865	0.00384
0.11805	0.02584	0.11805	0.01564	0.11805	0.00384
0.11649	0.02589	0.11649	0.01569	0.11649	0.00389
0.1172	0.02589	0.1172	0.01569	0.1172	0.00389
0.11706	0.02589	0.11706	0.01569	0.11706	0.00389
0.11604	0.02589	0.11604	0.01569	0.11604	0.00389
0.11719	0.02593	0.11719	0.01573	0.11719	0.00393
0.11791	0.02593	0.11791	0.01573	0.11791	0.00393
0.11772	0.02593	0.11772	0.01573	0.11772	0.00393
0.11819	0.02593	0.11819	0.01573	0.11819	0.00393
0.11844	0.02593	0.11844	0.01573	0.11844	0.00393
0.12652	0.02597	0.12652	0.01577	0.12652	0.00397
0.11784	0.02597	0.11784	0.01577	0.11784	0.00397
0.11833	0.02597	0.11833	0.01577	0.11833	0.00397
0.11797	0.02597	0.11797	0.01577	0.11797	0.00397
0.11905	0.02597	0.11905	0.01577	0.11905	0.00397
0.11812	0.02602	0.11812	0.01582	0.11812	0.00402
0.11802	0.02602	0.11802	0.01582	0.11802	0.00402
0.11821	0.02602	0.11821	0.01582	0.11821	0.00402
0.11892	0.02602	0.11892	0.01582	0.11892	0.00402
0.11846	0.02602	0.11846	0.01582	0.11846	0.00402
0.11809	0.02606	0.11809	0.01586	0.11809	0.00406
0.11718	0.02606	0.11718	0.01586	0.11718	0.00406
0.11766	0.02606	0.11766	0.01586	0.11766	0.00406
0.11761	0.02606	0.11761	0.01586	0.11761	0.00406
0.11741	0.02606	0.11741	0.01586	0.11741	0.00406
0.1187	0.02611	0.1187	0.01591	0.1187	0.00411
0.11821	0.02611	0.11821	0.01591	0.11821	0.00411
0.11779	0.02611	0.11779	0.01591	0.11779	0.00411
0.11809	0.02611	0.11809	0.01591	0.11809	0.00411
0.12679	0.02615	0.12679	0.01595	0.12679	0.00415
0.12042	0.02615	0.12042	0.01595	0.12042	0.00415
0.11861	0.02615	0.11861	0.01595	0.11861	0.00415
0.11934	0.02615	0.11934	0.01595	0.11934	0.00415
0.11856	0.02615	0.11856	0.01595	0.11856	0.00415
0.11915	0.02615	0.11915	0.01595	0.11915	0.00415
0.1172	0.02619	0.1172	0.01599	0.1172	0.00419
0.11732	0.02619	0.11732	0.01599	0.11732	0.00419
0.11749	0.02619	0.11749	0.01599	0.11749	0.00419
0.11883	0.02619	0.11883	0.01599	0.11883	0.00419
0.11855	0.02619	0.11855	0.01599	0.11855	0.00419
0.1122	0.02624	0.1122	0.01604	0.1122	0.00424
0.11681	0.02624	0.11681	0.01604	0.11681	0.00424
0.11687	0.02624	0.11687	0.01604	0.11687	0.00424
0.11706	0.02624	0.11706	0.01604	0.11706	0.00424
0.11606	0.02624	0.11606	0.01604	0.11606	0.00424
0.11674	0.02624	0.11674	0.01604	0.11674	0.00424
0.11645	0.02628	0.11645	0.01608	0.11645	0.00428
0.11763	0.02628	0.11763	0.01608	0.11763	0.00428
0.11807	0.02628	0.11807	0.01608	0.11807	0.00428
0.11682	0.02628	0.11682	0.01608	0.11682	0.00428
0.11691	0.02628	0.11691	0.01608	0.11691	0.00428
0.11819	0.02628	0.11819	0.01608	0.11819	0.00428
0.11827	0.02632	0.11827	0.01612	0.11827	0.00432
0.1193	0.02632	0.1193	0.01612	0.1193	0.00432
0.12047	0.02632	0.12047	0.01612	0.12047	0.00432
0.11982	0.02632	0.11982	0.01612	0.11982	0.00432
0.11856	0.02632	0.11856	0.01612	0.11856	0.00432
0.11907	0.02637	0.11907	0.01617	0.11907	0.00437
0.11953	0.02637	0.11953	0.01617	0.11953	0.00437
0.11874	0.02637	0.11874	0.01617	0.11874	0.00437
0.11989	0.02637	0.11989	0.01617	0.11989	0.00437
0.1198	0.02637	0.1198	0.01617	0.1198	0.00437
0.11912	0.02637	0.11912	0.01617	0.11912	0.00437
0.11892	0.02641	0.11892	0.01621	0.11892	0.00441
0.11876	0.02641	0.11876	0.01621	0.11876	0.00441
0.1197	0.02641	0.1197	0.01621	0.1197	0.00441
0.12008	0.02641	0.12008	0.01621	0.12008	0.00441
0.12003	0.02641	0.12003	0.01621	0.12003	0.00441
0.11998	0.02646	0.11998	0.01626	0.11998	0.00446
0.12075	0.02646	0.12075	0.01626	0.12075	0.00446
0.12042	0.02646	0.12042	0.01626	0.12042	0.00446
0.12038	0.02646	0.12038	0.01626	0.12038	0.00446
0.12175	0.02646	0.12175	0.01626	0.12175	0.00446
0.13091	0.0265	0.13091	0.0163	0.13091	0.0045
0.12126	0.0265	0.12126	0.0163	0.12126	0.0045
0.12125	0.0265	0.12125	0.0163	0.12125	0.0045
0.12095	0.0265	0.12095	0.0163	0.12095	0.0045
0.12035	0.0265	0.12035	0.0163	0.12035	0.0045
0.12148	0.02654	0.12148	0.01634	0.12148	0.00454
0.12175	0.02654	0.12175	0.01634	0.12175	0.00454
0.12198	0.02654	0.12198	0.01634	0.12198	0.00454
0.12162	0.02654	0.12162	0.01634	0.12162	0.00454
0.12231	0.02654	0.12231	0.01634	0.12231	0.00454
0.11628	0.02659	0.11628	0.01639	0.11628	0.00459
0.11491	0.02659	0.11491	0.01639	0.11491	0.00459
0.12074	0.02659	0.12074	0.01639	0.12074	0.00459
0.11996	0.02659	0.11996	0.01639	0.11996	0.00459
0.1213	0.02659	0.1213	0.01639	0.1213	0.00459
0.12143	0.02659	0.12143	0.01639	0.12143	0.00459
0.12121	0.02663	0.12121	0.01643	0.12121	0.00463
0.12246	0.02663	0.12246	0.01643	0.12246	0.00463
0.12212	0.02663	0.12212	0.01643	0.12212	0.00463
0.12222	0.02663	0.12222	0.01643	0.12222	0.00463
0.12098	0.02663	0.12098	0.01643	0.12098	0.00463
0.12808	0.02668	0.12808	0.01648	0.12808	0.00468
0.12223	0.02668	0.12223	0.01648	0.12223	0.00468
0.12364	0.02668	0.12364	0.01648	0.12364	0.00468
0.12199	0.02668	0.12199	0.01648	0.12199	0.00468
0.12052	0.02668	0.12052	0.01648	0.12052	0.00468
0.12031	0.02668	0.12031	0.01648	0.12031	0.00468
0.12166	0.02672	0.12166	0.01652	0.12166	0.00472
0.12149	0.02672	0.12149	0.01652	0.12149	0.00472
0.12167	0.02672	0.12167	0.01652	0.12167	0.00472
0.1208	0.02672	0.1208	0.01652	0.1208	0.00472
0.12089	0.02672	0.12089	0.01652	0.12089	0.00472
0.11184	0.02676	0.11184	0.01656	0.11184	0.00476
0.12052	0.02676	0.12052	0.01656	0.12052	0.00476
0.1198	0.02676	0.1198	0.01656	0.1198	0.00476
0.12098	0.02676	0.12098	0.01656	0.12098	0.00476
0.1212	0.02676	0.1212	0.01656	0.1212	0.00476
0.11979	0.02681	0.11979	0.01661	0.11979	0.00481
0.12112	0.02681	0.12112	0.01661	0.12112	0.00481
0.12254	0.02681	0.12254	0.01661	0.12254	0.00481
0.12172	0.02681	0.12172	0.01661	0.12172	0.00481
0.12186	0.02681	0.12186	0.01661	0.12186	0.00481
0.12858	0.02685	0.12858	0.01665	0.12858	0.00485
0.12237	0.02685	0.12237	0.01665	0.12237	0.00485
0.12298	0.02685	0.12298	0.01665	0.12298	0.00485
0.12282	0.02685	0.12282	0.01665	0.12282	0.00485
0.12237	0.02685	0.12237	0.01665	0.12237	0.00485
0.1231	0.02689	0.1231	0.01669	0.1231	0.00489
0.12422	0.02689	0.12422	0.01669	0.12422	0.00489
0.1231	0.02689	0.1231	0.01669	0.1231	0.00489
0.12353	0.02689	0.12353	0.01669	0.12353	0.00489
0.12336	0.02689	0.12336	0.01669	0.12336	0.00489
0.12451	0.02689	0.12451	0.01669	0.12451	0.00489
0.12007	0.02694	0.12007	0.01674	0.12007	0.00494
0.1241	0.02694	0.1241	0.01674	0.1241	0.00494
0.12358	0.02694	0.12358	0.01674	0.12358	0.00494
0.12372	0.02694	0.12372	0.01674	0.12372	0.00494
0.12408	0.02694	0.12408	0.01674	0.12408	0.00494
0.12437	0.02698	0.12437	0.01678	0.12437	0.00498
0.12518	0.02698	0.12518	0.01678	0.12518	0.00498
0.12422	0.02698	0.12422	0.01678	0.12422	0.00498
0.12487	0.02698	0.12487	0.01678	0.12487	0.00498
0.12625	0.02698	0.12625	0.01678	0.12625	0.00498
0.12606	0.02703	0.12606	0.01683	0.12606	0.00503
0.12642	0.02703	0.12642	0.01683	0.12642	0.00503
0.12661	0.02703	0.12661	0.01683	0.12661	0.00503
0.12685	0.02703	0.12685	0.01683	0.12685	0.00503
0.12707	0.02707	0.12707	0.01687	0.12707	0.00507
0.12701	0.02707	0.12701	0.01687	0.12701	0.00507
0.12708	0.02707	0.12708	0.01687	0.12708	0.00507
0.12624	0.02707	0.12624	0.01687	0.12624	0.00507
0.12791	0.02707	0.12791	0.01687	0.12791	0.00507
0.12134	0.02711	0.12134	0.01691	0.12134	0.00511
0.12778	0.02711	0.12778	0.01691	0.12778	0.00511
0.12702	0.02711	0.12702	0.01691	0.12702	0.00511
0.12772	0.02711	0.12772	0.01691	0.12772	0.00511
0.12825	0.02711	0.12825	0.01691	0.12825	0.00511
0.12735	0.02711	0.12735	0.01691	0.12735	0.00511
0.12791	0.02716	0.12791	0.01696	0.12791	0.00516
0.12674	0.02716	0.12674	0.01696	0.12674	0.00516
0.12864	0.02716	0.12864	0.01696	0.12864	0.00516
0.12827	0.02716	0.12827	0.01696	0.12827	0.00516
0.14016	0.0272	0.14016	0.017	0.14016	0.0052
0.12931	0.0272	0.12931	0.017	0.12931	0.0052
0.12932	0.0272	0.12932	0.017	0.12932	0.0052
0.12977	0.0272	0.12977	0.017	0.12977	0.0052
0.12964	0.0272	0.12964	0.017	0.12964	0.0052
0.12991	0.02725	0.12991	0.01705	0.12991	0.00525
0.1301	0.02725	0.1301	0.01705	0.1301	0.00525
0.13109	0.02725	0.13109	0.01705	0.13109	0.00525
0.13139	0.02725	0.13139	0.01705	0.13139	0.00525
0.12928	0.02729	0.12928	0.01709	0.12928	0.00529
0.12963	0.02729	0.12963	0.01709	0.12963	0.00529
0.12984	0.02729	0.12984	0.01709	0.12984	0.00529
0.12894	0.02729	0.12894	0.01709	0.12894	0.00529
0.13047	0.02733	0.13047	0.01713	0.13047	0.00533
0.12872	0.02733	0.12872	0.01713	0.12872	0.00533
0.13032	0.02733	0.13032	0.01713	0.13032	0.00533
0.12976	0.02733	0.12976	0.01713	0.12976	0.00533
0.14099	0.02738	0.14099	0.01718	0.14099	0.00538
0.13011	0.02738	0.13011	0.01718	0.13011	0.00538
0.13105	0.02738	0.13105	0.01718	0.13105	0.00538
0.13192	0.02738	0.13192	0.01718	0.13192	0.00538
0.13338	0.02742	0.13338	0.01722	0.13338	0.00542
0.13141	0.02742	0.13141	0.01722	0.13141	0.00542
0.13151	0.02742	0.13151	0.01722	0.13151	0.00542
0.12223	0.02746	0.12223	0.01726	0.12223	0.00546
0.13113	0.02746	0.13113	0.01726	0.13113	0.00546
0.1297	0.02746	0.1297	0.01726	0.1297	0.00546
0.12935	0.02746	0.12935	0.01726	0.12935	0.00546
0.12981	0.02751	0.12981	0.01731	0.12981	0.00551
0.1302	0.02751	0.1302	0.01731	0.1302	0.00551
0.13021	0.02751	0.13021	0.01731	0.13021	0.00551
0.13862	0.02755	0.13862	0.01735	0.13862	0.00555
0.13288	0.02755	0.13288	0.01735	0.13288	0.00555
0.13239	0.02755	0.13239	0.01735	0.13239	0.00555
0.13247	0.0276	0.13247	0.0174	0.13247	0.0056
0.13288	0.0276	0.13288	0.0174	0.13288	0.0056
0.13252	0.0276	0.13252	0.0174	0.13252	0.0056
0.1278	0.02764	0.1278	0.01744	0.1278	0.00564
0.13221	0.02764	0.13221	0.01744	0.13221	0.00564
0.13193	0.02768	0.13193	0.01748	0.13193	0.00568
0.13275	0.02768	0.13275	0.01748	0.13275	0.00568
0.13175	0.02768	0.13175	0.01748	0.13175	0.00568
0.13175	0.02768	0.13175	0.01748	0.13175	0.00568
0.13295	0.02773	0.13295	0.01753	0.13295	0.00573
0.13316	0.02773	0.13316	0.01753	0.13316	0.00573
0.13263	0.02777	0.13263	0.01757	0.13263	0.00577
0.13257	0.02777	0.13257	0.01757	0.13257	0.00577
0.13294	0.02777	0.13294	0.01757	0.13294	0.00577
0.13093	0.02782	0.13093	0.01762	0.13093	0.00582
0.13266	0.02782	0.13266	0.01762	0.13266	0.00582
0.13331	0.02786	0.13331	0.01766	0.13331	0.00586
0.13388	0.02786	0.13388	0.01766	0.13388	0.00586
0.13458	0.02786	0.13458	0.01766	0.13458	0.00586
0.14176	0.0279	0.14176	0.0177	0.14176	0.0059
0.13449	0.0279	0.13449	0.0177	0.13449	0.0059
0.13414	0.02795	0.13414	0.01775	0.13414	0.00595
0.13419	0.02795	0.13419	0.01775	0.13419	0.00595
0.13467	0.02795	0.13467	0.01775	0.13467	0.00595
0.13321	0.02799	0.13321	0.01779	0.13321	0.00599
0.13433	0.02799	0.13433	0.01779	0.13433	0.00599
0.13599	0.02804	0.13599	0.01784	0.13599	0.00604
0.13498	0.02804	0.13498	0.01784	0.13498	0.00604
0.14207	0.02808	0.14207	0.01788	0.14207	0.00608
0.13579	0.02808	0.13579	0.01788	0.13579	0.00608
0.1362	0.02808	0.1362	0.01788	0.1362	0.00608
0.13682	0.02812	0.13682	0.01792	0.13682	0.00612
0.13641	0.02812	0.13641	0.01792	0.13641	0.00612
0.13621	0.02817	0.13621	0.01797	0.13621	0.00617
0.1374	0.02817	0.1374	0.01797	0.1374	0.00617
0.13844	0.02821	0.13844	0.01801	0.13844	0.00621
0.13783	0.02821	0.13783	0.01801	0.13783	0.00621
0.14034	0.02825	0.14034	0.01805	0.14034	0.00625
0.13863	0.02825	0.13863	0.01805	0.13863	0.00625
0.13988	0.0283	0.13988	0.0181	0.13988	0.0063
0.139	0.0283	0.139	0.0181	0.139	0.0063
0.1323	0.02834	0.1323	0.01814	0.1323	0.00634
0.14017	0.02834	0.14017	0.01814	0.14017	0.00634
0.14151	0.02839	0.14151	0.01819	0.14151	0.00639
0.15344	0.02843	0.15344	0.01823	0.15344	0.00643
0.14208	0.02843	0.14208	0.01823	0.14208	0.00643
0.14147	0.02847	0.14147	0.01827	0.14147	0.00647
0.1423	0.02847	0.1423	0.01827	0.1423	0.00647
0.14051	0.02852	0.14051	0.01832	0.14051	0.00652
0.14328	0.02852	0.14328	0.01832	0.14328	0.00652
0.14356	0.02856	0.14356	0.01836	0.14356	0.00656
0.15257	0.02861	0.15257	0.01841	0.15257	0.00661
0.14258	0.02865	0.14258	0.01845	0.14258	0.00665
0.14389	0.02865	0.14389	0.01845	0.14389	0.00665
0.13193	0.02869	0.13193	0.01849	0.13193	0.00669
0.14343	0.02869	0.14343	0.01849	0.14343	0.00669
0.14399	0.02874	0.14399	0.01854	0.14399	0.00674
0.14507	0.02878	0.14507	0.01858	0.14507	0.00678
0.14483	0.02882	0.14483	0.01862	0.14483	0.00682
0.13691	0.02887	0.13691	0.01867	0.13691	0.00687
0.14346	0.02887	0.14346	0.01867	0.14346	0.00687
0.14502	0.02891	0.14502	0.01871	0.14502	0.00691
0.15401	0.02896	0.15401	0.01876	0.15401	0.00696
0.14608	0.029	0.14608	0.0188	0.14608	0.007
0.14675	0.029	0.14675	0.0188	0.14675	0.007
0.14684	0.02909	0.14684	0.01889	0.14684	0.00709
0.14679	0.02909	0.14679	0.01889	0.14679	0.00709
0.14961	0.02913	0.14961	0.01893	0.14961	0.00713
0.14866	0.02918	0.14866	0.01897	0.14866	0.00718
0.14246	0.02922	0.14246	0.01902	0.14246	0.00722
0.14934	0.02926	0.14934	0.01906	0.14934	0.00726
0.1502	0.02926	0.1502	0.01906	0.1502	0.00726
0.15216	0.02935	0.15216	0.01915	0.15216	0.00735
0.15178	0.02935	0.15178	0.01915	0.15178	0.00735
0.15066	0.02939	0.15066	0.01919	0.15066	0.00739
0.15041	0.02944	0.15041	0.01924	0.15041	0.00744
0.15469	0.02948	0.15469	0.01928	0.15469	0.00748
0.1542	0.02953	0.1542	0.01933	0.1542	0.00753
0.1527	0.02957	0.1527	0.01937	0.1527	0.00757
0.15266	0.02961	0.15266	0.01941	0.15266	0.00761
0.15425	0.02966	0.15425	0.01946	0.15425	0.00766
0.15362	0.0297	0.15362	0.0195	0.15362	0.0077
0.14649	0.02975	0.14649	0.01955	0.14649	0.00775
0.15378	0.02979	0.15378	0.01959	0.15378	0.00779
0.16294	0.02983	0.16294	0.01963	0.16294	0.00783
0.15273	0.02992	0.15273	0.01972	0.15273	0.00792
0.14835	0.02992	0.14835	0.01972	0.14835	0.00792
0.1636	0.03001	0.1636	0.01981	0.1636	0.00801
0.15764	0.03001	0.15764	0.01981	0.15764	0.00801
0.15085	0.0301	0.15085	0.0199	0.15085	0.0081
0.15764	0.03014	0.15764	0.01994	0.15764	0.00814
0.16254	0.03018	0.16254	0.01998	0.16254	0.00818
0.15956	0.03023	0.15956	0.02003	0.15956	0.00823
0.15828	0.03027	0.15828	0.02007	0.15828	0.00827
0.15837	0.03032	0.15837	0.02012	0.15837	0.00832
0.16212	0.0304	0.16212	0.0202	0.16212	0.0084
0.15344	0.03045	0.15344	0.02025	0.15344	0.00845
0.16072	0.03049	0.16072	0.02029	0.16072	0.00849
0.16926	0.03054	0.16926	0.02034	0.16926	0.00854
0.16334	0.03058	0.16334	0.02038	0.16334	0.00858
0.16177	0.03067	0.16177	0.02047	0.16177	0.00867
0.17153	0.03071	0.17153	0.02051	0.17153	0.00871
0.15823	0.0308	0.15823	0.0206	0.15823	0.0088
0.16087	0.0308	0.16087	0.0206	0.16087	0.0088
0.172	0.03089	0.172	0.02069	0.172	0.00889
0.16346	0.03093	0.16346	0.02073	0.16346	0.00893
0.163	0.03102	0.163	0.02082	0.163	0.00902
0.17134	0.03106	0.17134	0.02086	0.17134	0.00906
0.15368	0.03115	0.15368	0.02095	0.15368	0.00915
0.16182	0.03119	0.16182	0.02099	0.16182	0.00919
0.17349	0.03124	0.17349	0.02104	0.17349	0.00924
0.16403	0.03128	0.16403	0.02108	0.16403	0.00928
0.16295	0.03132	0.16295	0.02112	0.16295	0.00932
0.16807	0.03146	0.16807	0.02126	0.16807	0.00946
0.16728	0.03146	0.16728	0.02126	0.16728	0.00946
0.17347	0.03159	0.17347	0.02139	0.17347	0.00959
0.16972	0.03163	0.16972	0.02143	0.16972	0.00963
0.1663	0.03168	0.1663	0.02148	0.1663	0.00968
0.17471	0.03176	0.17471	0.02156	0.17471	0.00976
0.16632	0.03185	0.16632	0.02165	0.16632	0.00985
0.17271	0.03189	0.17271	0.02169	0.17271	0.00989
0.17622	0.03198	0.17622	0.02178	0.17622	0.00998
0.1689	0.03203	0.1689	0.02183	0.1689	0.01003
0.17469	0.03207	0.17469	0.02187	0.17469	0.01007
0.17712	0.03216	0.17712	0.02196	0.17712	0.01016
0.16989	0.0322	0.16989	0.022	0.16989	0.0102
0.1903	0.03229	0.1903	0.02209	0.1903	0.01029
0.17928	0.03233	0.17928	0.02213	0.17928	0.01033
0.17833	0.03242	0.17833	0.02222	0.17833	0.01042
0.18692	0.03246	0.18692	0.02226	0.18692	0.01046
0.17673	0.0326	0.17673	0.0224	0.17673	0.0106
0.17934	0.0326	0.17934	0.0224	0.17934	0.0106
0.17036	0.03273	0.17036	0.02253	0.17036	0.01073
0.17999	0.03277	0.17999	0.02257	0.17999	0.01077
0.18114	0.03286	0.18114	0.02266	0.18114	0.01086
0.17176	0.0329	0.17176	0.0227	0.17176	0.0109
0.18717	0.03299	0.18717	0.02279	0.18717	0.01099
0.17311	0.03308	0.17311	0.02288	0.17311	0.01108
0.18267	0.03312	0.18267	0.02292	0.18267	0.01112
0.18552	0.03321	0.18552	0.02301	0.18552	0.01121
0.17865	0.0333	0.17865	0.0231	0.17865	0.0113
0.19021	0.03339	0.19021	0.02319	0.19021	0.01139
0.17944	0.03343	0.17944	0.02323	0.17944	0.01143
0.19679	0.03352	0.19679	0.02332	0.19679	0.01152
0.1881	0.03356	0.1881	0.02336	0.1881	0.01156
0.19588	0.03369	0.19588	0.02349	0.19588	0.01169
0.18855	0.03374	0.18855	0.02354	0.18855	0.01174
0.18951	0.03382	0.18951	0.02362	0.18951	0.01182
0.19185	0.03391	0.19185	0.02371	0.19185	0.01191
0.19067	0.034	0.19067	0.0238	0.19067	0.012
0.19919	0.03404	0.19919	0.02384	0.19919	0.01204
0.19048	0.03418	0.19048	0.02398	0.19048	0.01218
0.20003	0.03422	0.20003	0.02402	0.20003	0.01222
0.18419	0.03435	0.18419	0.02415	0.18419	0.01235
0.20362	0.03439	0.20362	0.02419	0.20362	0.01239
0.19399	0.03444	0.19399	0.02424	0.19399	0.01244
0.20083	0.03457	0.20083	0.02437	0.20083	0.01257
0.19506	0.03461	0.19506	0.02441	0.19506	0.01261
0.20471	0.03475	0.20471	0.02455	0.20471	0.01275
0.19613	0.03479	0.19613	0.02459	0.19613	0.01279
0.20288	0.03492	0.20288	0.02472	0.20288	0.01292
0.19633	0.03496	0.19633	0.02476	0.19633	0.01296
0.20668	0.0351	0.20668	0.0249	0.20668	0.0131
0.19689	0.03514	0.19689	0.02494	0.19689	0.01314
0.20683	0.03527	0.20683	0.02507	0.20683	0.01327
0.19277	0.03536	0.19277	0.02516	0.19277	0.01336
0.20721	0.03545	0.20721	0.02525	0.20721	0.01345
0.19178	0.03554	0.19178	0.02534	0.19178	0.01354
0.19892	0.03558	0.19892	0.02538	0.19892	0.01358
0.19221	0.03571	0.19221	0.02551	0.19221	0.01371
0.20154	0.03575	0.20154	0.02555	0.20154	0.01375
0.19543	0.03589	0.19543	0.02569	0.19543	0.01389
0.20355	0.03593	0.20355	0.02573	0.20355	0.01393
0.1946	0.03606	0.1946	0.02586	0.1946	0.01406
0.21407	0.03615	0.21407	0.02595	0.21407	0.01415
0.19753	0.03628	0.19753	0.02608	0.19753	0.01428
0.21406	0.03632	0.21406	0.02612	0.21406	0.01432
0.21296	0.0365	0.21296	0.0263	0.21296	0.0145
0.21099	0.03654	0.21099	0.02634	0.21099	0.01454
0.2145	0.03667	0.2145	0.02647	0.2145	0.01468
0.20875	0.03672	0.20875	0.02652	0.20875	0.01472
0.21678	0.03685	0.21678	0.02665	0.21678	0.01485
0.20092	0.03694	0.20092	0.02674	0.20092	0.01494
0.20802	0.03698	0.20802	0.02678	0.20802	0.01498
0.20069	0.03716	0.20069	0.02696	0.20069	0.01516
0.21771	0.0372	0.21771	0.027	0.21771	0.0152
0.20824	0.03733	0.20824	0.02713	0.20824	0.01533
0.22181	0.03742	0.22181	0.02722	0.22181	0.01542
0.21539	0.03755	0.21539	0.02735	0.21539	0.01555
0.21427	0.0376	0.21427	0.0274	0.21427	0.0156
0.22568	0.03777	0.22568	0.02757	0.22568	0.01577
0.20867	0.03782	0.20867	0.02762	0.20867	0.01582
0.21776	0.03795	0.21776	0.02775	0.21776	0.01595
0.20932	0.03804	0.20932	0.02784	0.20932	0.01604
0.21108	0.03817	0.21108	0.02797	0.21108	0.01617
0.22252	0.03825	0.22252	0.02805	0.22252	0.01625
0.21285	0.03839	0.21285	0.02819	0.21285	0.01639
0.232	0.03847	0.232	0.02827	0.232	0.01647
0.23118	0.03861	0.23118	0.02841	0.23118	0.01661
0.22366	0.03865	0.22366	0.02845	0.22366	0.01665
0.22087	0.03874	0.22087	0.02854	0.22087	0.01674
0.21682	0.03891	0.21682	0.02871	0.21682	0.01691
0.23559	0.03896	0.23559	0.02876	0.23559	0.01696
0.23355	0.03913	0.23355	0.02893	0.23355	0.01713
0.23018	0.03918	0.23018	0.02898	0.23018	0.01717
0.23666	0.03935	0.23666	0.02915	0.23666	0.01735
0.22106	0.03939	0.22106	0.02919	0.22106	0.01739
0.22316	0.03957	0.22316	0.02937	0.22316	0.01757
0.23509	0.03966	0.23509	0.02946	0.23509	0.01766
0.22149	0.03979	0.22149	0.02959	0.22149	0.01779
0.2429	0.03983	0.2429	0.02963	0.2429	0.01783
0.24244	0.04001	0.24244	0.02981	0.24244	0.01801
0.23642	0.04005	0.23642	0.02985	0.23642	0.01805
0.24414	0.04023	0.24414	0.03003	0.24414	0.01823
0.22926	0.04032	0.22926	0.03012	0.22926	0.01832
0.22922	0.04045	0.22922	0.03025	0.22922	0.01845
0.24402	0.04053	0.24402	0.03033	0.24402	0.01853
0.22954	0.04062	0.22954	0.03042	0.22954	0.01862
0.24264	0.04075	0.24264	0.03055	0.24264	0.01875
0.23588	0.04084	0.23588	0.03064	0.23588	0.01884
0.23285	0.04102	0.23285	0.03082	0.23285	0.01902
0.25359	0.04111	0.25359	0.03091	0.25359	0.01911
0.2349	0.04119	0.2349	0.03099	0.2349	0.01919
0.23519	0.04137	0.23519	0.03117	0.23519	0.01937
0.25396	0.04141	0.25396	0.03121	0.25396	0.01941
0.2587	0.04159	0.2587	0.03139	0.2587	0.01959
0.24333	0.04168	0.24333	0.03148	0.24333	0.01968
0.24609	0.04185	0.24609	0.03165	0.24609	0.01985
0.25798	0.04194	0.25798	0.03174	0.25798	0.01994
0.24871	0.04203	0.24871	0.03183	0.24871	0.02003
0.24715	0.0422	0.24715	0.032	0.24715	0.0202
0.24628	0.04225	0.24628	0.03205	0.24628	0.02025
0.26313	0.04233	0.26313	0.03213	0.26313	0.02033
0.26257	0.04251	0.26257	0.03231	0.26257	0.02051
0.24962	0.0426	0.24962	0.0324	0.24962	0.0206
0.25047	0.04277	0.25047	0.03257	0.25047	0.02077
0.26994	0.04286	0.26994	0.03266	0.26994	0.02086
0.25476	0.04295	0.25476	0.03275	0.25476	0.02095
0.25259	0.04308	0.25259	0.03288	0.25259	0.02108
0.27305	0.04317	0.27305	0.03297	0.27305	0.02117
0.27466	0.04334	0.27466	0.03314	0.27466	0.02134
0.25166	0.04343	0.25166	0.03323	0.25166	0.02143
0.27249	0.04352	0.27249	0.03332	0.27249	0.02152
0.27177	0.04374	0.27177	0.03354	0.27177	0.02174
0.26248	0.04378	0.26248	0.03358	0.26248	0.02178
0.25781	0.04396	0.25781	0.03376	0.25781	0.02196
0.27721	0.04409	0.27721	0.03389	0.27721	0.02209
0.27591	0.04422	0.27591	0.03402	0.27591	0.02222
0.2634	0.04431	0.2634	0.03411	0.2634	0.02231
0.26393	0.04435	0.26393	0.03415	0.26393	0.02235
0.26659	0.04448	0.26659	0.03428	0.26659	0.02248
0.28363	0.04461	0.28363	0.03441	0.28363	0.02261
0.2697	0.0447	0.2697	0.0345	0.2697	0.0227
0.27021	0.04483	0.27021	0.03463	0.27021	0.02283
0.2897	0.04492	0.2897	0.03472	0.2897	0.02292
0.29136	0.04514	0.29136	0.03494	0.29136	0.02314
0.27005	0.04523	0.27005	0.03503	0.27005	0.02323
0.27212	0.04536	0.27212	0.03516	0.27212	0.02336
0.29111	0.04549	0.29111	0.03529	0.29111	0.02349
0.27609	0.04558	0.27609	0.03538	0.27609	0.02358
0.27517	0.04571	0.27517	0.03551	0.27517	0.02371
0.2965	0.04584	0.2965	0.03564	0.2965	0.02384
0.27567	0.04593	0.27567	0.03573	0.27567	0.02393
0.28434	0.04611	0.28434	0.03591	0.28434	0.02411
0.29753	0.04619	0.29753	0.03599	0.29753	0.02419
0.29588	0.04637	0.29588	0.03617	0.29588	0.02437
0.2979	0.0465	0.2979	0.0363	0.2979	0.0245
0.28272	0.04659	0.28272	0.03639	0.28272	0.02459
0.28583	0.04676	0.28583	0.03656	0.28583	0.02476
0.30334	0.04685	0.30334	0.03665	0.30334	0.02485
0.302	0.04707	0.302	0.03687	0.302	0.02507
0.28984	0.04711	0.28984	0.03691	0.28984	0.02511
0.30472	0.0472	0.30472	0.037	0.30472	0.0252
0.30803	0.04742	0.30803	0.03722	0.30803	0.02542
0.2857	0.04751	0.2857	0.03731	0.2857	0.02551
0.28745	0.04768	0.28745	0.03748	0.28745	0.02568
0.30309	0.04782	0.30309	0.03762	0.30309	0.02582
0.30816	0.04795	0.30816	0.03775	0.30816	0.02595
0.30975	0.04808	0.30975	0.03788	0.30975	0.02608
0.2946	0.04817	0.2946	0.03797	0.2946	0.02617
0.30274	0.04839	0.30274	0.03819	0.30274	0.02639
0.31849	0.04843	0.31849	0.03823	0.31849	0.02643
0.30618	0.04856	0.30618	0.03836	0.30618	0.02656
0.30467	0.04874	0.30467	0.03854	0.30467	0.02674
0.32212	0.04882	0.32212	0.03862	0.32212	0.02682
0.32499	0.049	0.32499	0.0388	0.32499	0.027
0.32115	0.04913	0.32115	0.03893	0.32115	0.02713
0.32189	0.04931	0.32189	0.03911	0.32189	0.02731
0.30913	0.04939	0.30913	0.03919	0.30913	0.02739
0.32726	0.04948	0.32726	0.03928	0.32726	0.02748
0.32647	0.0497	0.32647	0.0395	0.32647	0.0277
0.31469	0.04975	0.31469	0.03955	0.31469	0.02775
0.32819	0.04988	0.32819	0.03968	0.32819	0.02788
0.31262	0.0501	0.31262	0.0399	0.31262	0.0281
0.32724	0.05018	0.32724	0.03998	0.32724	0.02818
0.33037	0.05036	0.33037	0.04016	0.33037	0.02836
0.31168	0.05049	0.31168	0.04029	0.31168	0.02849
0.32627	0.05058	0.32627	0.04038	0.32627	0.02858
0.328	0.05075	0.328	0.04055	0.328	0.02875
0.3225	0.05089	0.3225	0.04069	0.3225	0.02889
0.33177	0.0511	0.33177	0.0409	0.33177	0.0291
0.31324	0.05119	0.31324	0.04099	0.31324	0.02919
0.33265	0.05128	0.33265	0.04108	0.33265	0.02928
0.3199	0.0515	0.3199	0.0413	0.3199	0.0295
0.33667	0.05159	0.33667	0.04139	0.33667	0.02959
0.3381	0.05181	0.3381	0.04161	0.3381	0.02981
0.32552	0.05189	0.32552	0.04169	0.32552	0.02989
0.33226	0.05203	0.33226	0.04183	0.33226	0.03003
0.32978	0.0522	0.32978	0.042	0.32978	0.0302
0.34655	0.05229	0.34655	0.04209	0.34655	0.03029
0.34635	0.05251	0.34635	0.04231	0.34635	0.03051
0.33041	0.0526	0.33041	0.0424	0.33041	0.0306
0.33946	0.05273	0.33946	0.04253	0.33946	0.03073
0.33318	0.05295	0.33318	0.04275	0.33318	0.03095
0.3472	0.05299	0.3472	0.04279	0.3472	0.03099
0.3497	0.05325	0.3497	0.04305	0.3497	0.03125
0.35057	0.05334	0.35057	0.04314	0.35057	0.03134
0.35267	0.05352	0.35267	0.04332	0.35267	0.03152
0.33917	0.05365	0.33917	0.04345	0.33917	0.03165
0.35741	0.05378	0.35741	0.04358	0.35741	0.03178
0.34804	0.05396	0.34804	0.04376	0.34804	0.03196
0.36226	0.05404	0.36226	0.04384	0.36226	0.03204
0.34594	0.05418	0.34594	0.04398	0.34594	0.03218
0.3623	0.05439	0.3623	0.04419	0.3623	0.03239
0.35214	0.05448	0.35214	0.04428	0.35214	0.03248
0.34824	0.0547	0.34824	0.0445	0.34824	0.0327
0.35705	0.05483	0.35705	0.04463	0.35705	0.03283
0.35014	0.05501	0.35014	0.04481	0.35014	0.03301
0.36378	0.05514	0.36378	0.04494	0.36378	0.03314
0.34907	0.05523	0.34907	0.04503	0.34907	0.03323
0.35992	0.05545	0.35992	0.04525	0.35992	0.03345
0.35761	0.05554	0.35761	0.04534	0.35761	0.03354
0.37336	0.05567	0.37336	0.04547	0.37336	0.03367
0.37623	0.05584	0.37623	0.04564	0.37623	0.03384
0.37223	0.05597	0.37223	0.04577	0.37223	0.03397
0.37865	0.05619	0.37865	0.04599	0.37865	0.03419
0.36152	0.05628	0.36152	0.04608	0.36152	0.03428
0.37951	0.05654	0.37951	0.04634	0.37951	0.03454
0.3615	0.05663	0.3615	0.04643	0.3615	0.03463
0.36785	0.05676	0.36785	0.04656	0.36785	0.03476
0.37129	0.05694	0.37129	0.04674	0.37129	0.03494
0.38356	0.05707	0.38356	0.04687	0.38356	0.03507
0.38528	0.05725	0.38528	0.04705	0.38528	0.03525
0.38694	0.05738	0.38694	0.04718	0.38694	0.03538
0.37208	0.05751	0.37208	0.04731	0.37208	0.03551
0.39176	0.05773	0.39176	0.04753	0.39176	0.03573
0.37576	0.05782	0.37576	0.04762	0.37576	0.03582
0.37449	0.05803	0.37449	0.04783	0.37449	0.03603
0.37567	0.05817	0.37567	0.04797	0.37567	0.03617
0.3949	0.0583	0.3949	0.0481	0.3949	0.0363
0.39829	0.05847	0.39829	0.04827	0.39829	0.03647
0.39492	0.0586	0.39492	0.0484	0.39492	0.0366
0.38084	0.05874	0.38084	0.04854	0.38084	0.03674
0.38602	0.05896	0.38602	0.04876	0.38602	0.03696
0.38137	0.05904	0.38137	0.04884	0.38137	0.03704
0.39829	0.05931	0.39829	0.04911	0.39829	0.03731
0.40084	0.05939	0.40084	0.04919	0.40084	0.03739
0.38924	0.05961	0.38924	0.04941	0.38924	0.03761
0.39451	0.05975	0.39451	0.04955	0.39451	0.03775
0.40169	0.05983	0.40169	0.04963	0.40169	0.03783
0.40717	0.06005	0.40717	0.04985	0.40717	0.03805
0.40795	0.06018	0.40795	0.04998	0.40795	0.03818
0.41247	0.0604	0.41247	0.0502	0.41247	0.0384
0.40364	0.06054	0.40364	0.05034	0.40364	0.03854
0.39623	0.06067	0.39623	0.05047	0.39623	0.03867
0.39942	0.06084	0.39942	0.05064	0.39942	0.03884
0.40082	0.06097	0.40082	0.05077	0.40082	0.03897
0.40773	0.06124	0.40773	0.05104	0.40773	0.03924
0.40138	0.06132	0.40138	0.05112	0.40138	0.03932
0.4196	0.06141	0.4196	0.05121	0.4196	0.03941
0.41199	0.06168	0.41199	0.05148	0.41199	0.03968
0.42365	0.06181	0.42365	0.05161	0.42365	0.03981
0.42592	0.06198	0.42592	0.05178	0.42592	0.03998
0.42223	0.06211	0.42223	0.05191	0.42223	0.04011
0.40942	0.06225	0.40942	0.05205	0.40942	0.04025
0.41626	0.06246	0.41626	0.05226	0.41626	0.04046
0.41412	0.0626	0.41412	0.0524	0.41412	0.0406
0.43071	0.06282	0.43071	0.05262	0.43071	0.04082
0.41716	0.0629	0.41716	0.0527	0.41716	0.0409
0.43198	0.06317	0.43198	0.05297	0.43198	0.04117
0.41645	0.0633	0.41645	0.0531	0.41645	0.0413
0.43406	0.06339	0.43406	0.05319	0.43406	0.04139
0.4238	0.06365	0.4238	0.05345	0.4238	0.04165
0.43994	0.06374	0.43994	0.05354	0.43994	0.04174
0.423	0.06396	0.423	0.05376	0.423	0.04196
0.43978	0.06409	0.43978	0.05389	0.43978	0.04209
0.43794	0.06422	0.43794	0.05402	0.43794	0.04222
0.44125	0.06444	0.44125	0.05424	0.44125	0.04244
0.43634	0.06457	0.43634	0.05437	0.43634	0.04257
0.43947	0.06483	0.43947	0.05463	0.43947	0.04283
0.43409	0.06492	0.43409	0.05472	0.43409	0.04292
0.43164	0.06505	0.43164	0.05485	0.43164	0.04305
0.44636	0.06532	0.44636	0.05512	0.44636	0.04332
0.4374	0.06545	0.4374	0.05525	0.4374	0.04345
0.45033	0.06567	0.45033	0.05547	0.45033	0.04367
0.44086	0.0658	0.44086	0.0556	0.44086	0.0438
0.45601	0.06602	0.45601	0.05582	0.45601	0.04402
0.44528	0.06615	0.44528	0.05595	0.44528	0.04415
0.44146	0.06628	0.44146	0.05608	0.44146	0.04428
0.44414	0.0665	0.44414	0.0563	0.44414	0.0445
0.44539	0.06663	0.44539	0.05643	0.44539	0.04463
0.45232	0.06676	0.45232	0.05656	0.45232	0.04476
0.44575	0.06698	0.44575	0.05678	0.44575	0.04498
0.46012	0.06711	0.46012	0.05691	0.46012	0.04511
0.455	0.06738	0.455	0.05718	0.455	0.04538
0.44868	0.06751	0.44868	0.05731	0.44868	0.04551
0.45932	0.06773	0.45932	0.05753	0.45932	0.04573
0.4521	0.06786	0.4521	0.05766	0.4521	0.04586
0.45997	0.06799	0.45997	0.05779	0.45997	0.04599
0.4542	0.06821	0.4542	0.05801	0.4542	0.04621
0.45592	0.06834	0.45592	0.05814	0.45592	0.04634
0.47405	0.06865	0.47405	0.05845	0.47405	0.04665
0.45974	0.06874	0.45974	0.05854	0.45974	0.04674
0.47224	0.06887	0.47224	0.05867	0.47224	0.04687
0.46828	0.06913	0.46828	0.05893	0.46828	0.04713
0.46672	0.06922	0.46672	0.05902	0.46672	0.04722
0.47725	0.06948	0.47725	0.05928	0.47725	0.04748
0.46696	0.06966	0.46696	0.05946	0.46696	0.04766
0.46347	0.06979	0.46347	0.05959	0.46347	0.04779
0.47536	0.07001	0.47536	0.05981	0.47536	0.04801
0.46598	0.07014	0.46598	0.05994	0.46598	0.04814
0.47876	0.07045	0.47876	0.06025	0.47876	0.04845
0.46802	0.07053	0.46802	0.06033	0.46802	0.04853
0.47077	0.07067	0.47077	0.06047	0.47077	0.04867
0.48547	0.07093	0.48547	0.06073	0.48547	0.04893
0.47047	0.07102	0.47047	0.06082	0.47047	0.04902
0.47997	0.07132	0.47997	0.06112	0.47997	0.04932
0.49045	0.07146	0.49045	0.06126	0.49045	0.04946
0.49142	0.07163	0.49142	0.06143	0.49142	0.04963
0.48619	0.07185	0.48619	0.06165	0.48619	0.04985
0.49488	0.07198	0.49488	0.06178	0.49488	0.04998
0.47799	0.07225	0.47799	0.06205	0.47799	0.05025
0.48704	0.07238	0.48704	0.06218	0.48704	0.05038
0.49669	0.07251	0.49669	0.06231	0.49669	0.05051
0.48678	0.07282	0.48678	0.06262	0.48678	0.05082
0.49272	0.0729	0.49272	0.0627	0.49272	0.0509
0.49784	0.07321	0.49784	0.06301	0.49784	0.05121
0.48947	0.07334	0.48947	0.06314	0.48947	0.05134
0.48462	0.07347	0.48462	0.06327	0.48462	0.05147
0.50177	0.07374	0.50177	0.06354	0.50177	0.05174
0.50125	0.07387	0.50125	0.06367	0.50125	0.05187
0.49325	0.07418	0.49325	0.06398	0.49325	0.05217
0.50719	0.07431	0.50719	0.06411	0.50719	0.05231
0.51182	0.07444	0.51182	0.06424	0.51182	0.05244
0.50479	0.07475	0.50479	0.06455	0.50479	0.05275
0.50042	0.07488	0.50042	0.06468	0.50042	0.05288
0.51844	0.07514	0.51844	0.06494	0.51844	0.05314
0.51472	0.07527	0.51472	0.06507	0.51472	0.05327
0.50881	0.07545	0.50881	0.06525	0.50881	0.05345
0.52531	0.07567	0.52531	0.06547	0.52531	0.05367
0.52591	0.07584	0.52591	0.06564	0.52591	0.05384
0.50989	0.0761	0.50989	0.0659	0.50989	0.0541
0.5293	0.07619	0.5293	0.06599	0.5293	0.05419
0.5309	0.07637	0.5309	0.06617	0.5309	0.05437
0.51574	0.07663	0.51574	0.06643	0.51574	0.05463
0.52976	0.07676	0.52976	0.06656	0.52976	0.05476
0.53751	0.07703	0.53751	0.06683	0.53751	0.05503
0.53062	0.0772	0.53062	0.067	0.53062	0.0552
0.53402	0.07729	0.53402	0.06709	0.53402	0.05529
0.54212	0.0776	0.54212	0.0674	0.54212	0.0556
0.53863	0.07773	0.53863	0.06753	0.53863	0.05573
0.55372	0.07795	0.55372	0.06775	0.55372	0.05595
0.55271	0.07808	0.55271	0.06788	0.55271	0.05608
0.54754	0.07825	0.54754	0.06805	0.54754	0.05625
0.55862	0.07847	0.55862	0.06827	0.55862	0.05647
0.55401	0.0786	0.55401	0.0684	0.55401	0.0566
0.54972	0.07887	0.54972	0.06867	0.54972	0.05687
0.56443	0.07904	0.56443	0.06884	0.56443	0.05704
0.55494	0.07926	0.55494	0.06906	0.55494	0.05726
0.56273	0.07939	0.56273	0.06919	0.56273	0.05739
0.56756	0.07953	0.56756	0.06933	0.56756	0.05753
0.55363	0.07975	0.55363	0.06955	0.55363	0.05775
0.56981	0.07988	0.56981	0.06968	0.56981	0.05788
0.56699	0.08005	0.56699	0.06985	0.56699	0.05805
0.5655	0.08027	0.5655	0.07007	0.5655	0.05827
0.5739	0.0804	0.5739	0.0702	0.5739	0.0584
0.56058	0.08071	0.56058	0.07051	0.56058	0.05871
0.56304	0.0808	0.56304	0.0706	0.56304	0.0588
0.57124	0.08106	0.57124	0.07086	0.57124	0.05906
0.56033	0.08124	0.56033	0.07104	0.56033	0.05924
0.55907	0.08137	0.55907	0.07117	0.55907	0.05937
0.56925	0.08159	0.56925	0.07139	0.56925	0.05959
0.56766	0.08176	0.56766	0.07156	0.56766	0.05976
0.56006	0.08189	0.56006	0.07169	0.56006	0.05989
0.57811	0.08216	0.57811	0.07196	0.57811	0.06016
0.57321	0.08229	0.57321	0.07209	0.57321	0.06029
0.56373	0.0826	0.56373	0.0724	0.56373	0.0606
0.5812	0.08268	0.5812	0.07248	0.5812	0.06068
0.57118	0.08299	0.57118	0.07279	0.57118	0.06099
0.56923	0.08312	0.56923	0.07292	0.56923	0.06112
0.57831	0.08325	0.57831	0.07305	0.57831	0.06125
0.57628	0.08352	0.57628	0.07332	0.57628	0.06152
0.57348	0.08365	0.57348	0.07345	0.57348	0.06165
0.58943	0.08391	0.58943	0.07371	0.58943	0.06191
0.58423	0.08404	0.58423	0.07384	0.58423	0.06204
0.57763	0.08418	0.57763	0.07397	0.57763	0.06218
0.58488	0.08448	0.58488	0.07428	0.58488	0.06248
0.58978	0.08457	0.58978	0.07437	0.58978	0.06257
0.58335	0.08488	0.58335	0.07468	0.58335	0.06288
0.58593	0.08505	0.58593	0.07485	0.58593	0.06305
0.59479	0.08518	0.59479	0.07498	0.59479	0.06318
0.59095	0.08545	0.59095	0.07525	0.59095	0.06345
0.5894	0.08558	0.5894	0.07538	0.5894	0.06358
0.59595	0.08571	0.59595	0.07551	0.59595	0.06371
0.60012	0.08597	0.60012	0.07577	0.60012	0.06397
0.59448	0.08611	0.59448	0.07591	0.59448	0.06411
0.60825	0.08641	0.60825	0.07621	0.60825	0.06441
0.61685	0.08654	0.61685	0.07634	0.61685	0.06454
0.60311	0.08681	0.60311	0.07661	0.60311	0.06481
0.61597	0.08694	0.61597	0.07674	0.61597	0.06494
0.62819	0.08707	0.62819	0.07687	0.62819	0.06507
0.61016	0.08733	0.61016	0.07713	0.61016	0.06533
0.61957	0.08746	0.61957	0.07726	0.61957	0.06546
0.63453	0.0876	0.63453	0.0774	0.63453	0.0656
0.61808	0.08786	0.61808	0.07766	0.61808	0.06586
0.62957	0.08799	0.62957	0.07779	0.62957	0.06599
0.63489	0.08825	0.63489	0.07805	0.63489	0.06625
0.61981	0.08839	0.61981	0.07819	0.61981	0.06639
0.64057	0.08865	0.64057	0.07845	0.64057	0.06665
0.64183	0.08878	0.64183	0.07858	0.64183	0.06678
0.63323	0.08896	0.63323	0.07876	0.63323	0.06696
0.6512	0.08918	0.6512	0.07898	0.6512	0.06717
0.64593	0.08931	0.64593	0.07911	0.64593	0.06731
0.64678	0.08957	0.64678	0.07937	0.64678	0.06757
0.65273	0.0897	0.65273	0.0795	0.65273	0.0677
0.64906	0.08983	0.64906	0.07963	0.64906	0.06783
0.64416	0.0901	0.64416	0.0799	0.64416	0.0681
0.65894	0.09018	0.65894	0.07998	0.65894	0.06818
0.64464	0.09049	0.64464	0.08029	0.64464	0.06849
0.65424	0.09062	0.65424	0.08042	0.65424	0.06862
0.66264	0.09071	0.66264	0.08051	0.66264	0.06871
0.65501	0.09097	0.65501	0.08077	0.65501	0.06897
0.66942	0.09115	0.66942	0.08095	0.66942	0.06915
0.6586	0.09137	0.6586	0.08117	0.6586	0.06937
0.66869	0.0915	0.66869	0.0813	0.66869	0.0695
0.67799	0.09163	0.67799	0.08143	0.67799	0.06963
0.66975	0.09185	0.66975	0.08165	0.66975	0.06985
0.68255	0.09198	0.68255	0.08178	0.68255	0.06998
0.67124	0.09229	0.67124	0.08209	0.67124	0.07029
0.66798	0.09242	0.66798	0.08222	0.66798	0.07042
0.68569	0.09251	0.68569	0.08231	0.68569	0.07051
0.67407	0.09277	0.67407	0.08257	0.67407	0.07077
0.67669	0.0929	0.67669	0.0827	0.67669	0.0709
0.67325	0.09312	0.67325	0.08292	0.67325	0.07112
0.67745	0.09325	0.67745	0.08305	0.67745	0.07125
0.69078	0.09339	0.69078	0.08319	0.69078	0.07139
0.67946	0.09365	0.67946	0.08345	0.67946	0.07165
0.69101	0.09378	0.69101	0.08358	0.69101	0.07178
0.68541	0.09404	0.68541	0.08384	0.68541	0.07204
0.68924	0.09413	0.68924	0.08393	0.68924	0.07213
0.70167	0.09426	0.70167	0.08406	0.70167	0.07226
0.68474	0.09453	0.68474	0.08433	0.68474	0.07253
0.68395	0.0947	0.68395	0.0845	0.68395	0.0727
0.69153	0.09492	0.69153	0.08472	0.69153	0.07292
0.68707	0.09505	0.68707	0.08485	0.68707	0.07305
0.70494	0.09527	0.70494	0.08507	0.70494	0.07327
0.69185	0.09545	0.69185	0.08525	0.69185	0.07345
0.69515	0.09558	0.69515	0.08538	0.69515	0.07358
0.70928	0.09584	0.70928	0.08564	0.70928	0.07384
0.69757	0.09593	0.69757	0.08573	0.69757	0.07393
0.71933	0.09619	0.71933	0.08599	0.71933	0.07419
0.71662	0.09637	0.71662	0.08617	0.71662	0.07437
0.70499	0.0965	0.70499	0.0863	0.70499	0.0745
0.72064	0.09672	0.72064	0.08652	0.72064	0.07472
0.71273	0.09685	0.71273	0.08665	0.71273	0.07485
0.70378	0.09698	0.70378	0.08678	0.70378	0.07498
0.72014	0.0972	0.72014	0.087	0.72014	0.0752
0.71277	0.09738	0.71277	0.08718	0.71277	0.07538
0.72563	0.09764	0.72563	0.08744	0.72563	0.07564
0.73526	0.09777	0.73526	0.08757	0.73526	0.07577
0.71751	0.09786	0.71751	0.08766	0.71751	0.07586
0.7395	0.09812	0.7395	0.08792	0.7395	0.07612
0.73526	0.09825	0.73526	0.08805	0.73526	0.07625
0.74019	0.09847	0.74019	0.08827	0.74019	0.07647
0.7442	0.09865	0.7442	0.08845	0.7442	0.07665
0.73335	0.09878	0.73335	0.08858	0.73335	0.07678
0.73821	0.09904	0.73821	0.08884	0.73821	0.07704
0.73606	0.09913	0.73606	0.08893	0.73606	0.07713
0.73709	0.09939	0.73709	0.08919	0.73709	0.07739
0.75064	0.09953	0.75064	0.08933	0.75064	0.07753
0.7329	0.09961	0.7329	0.08941	0.7329	0.07761
0.75229	0.09988	0.75229	0.08968	0.75229	0.07788
0.74877	0.10005	0.74877	0.08985	0.74877	0.07805
0.74031	0.10027	0.74031	0.09007	0.74031	0.07827
0.74751	0.1004	0.74751	0.0902	0.74751	0.0784
0.74188	0.10053	0.74188	0.09033	0.74188	0.07853
0.74925	0.10075	0.74925	0.09055	0.74925	0.07875
0.7522	0.10093	0.7522	0.09073	0.7522	0.07893
0.73754	0.10119	0.73754	0.09099	0.73754	0.07919
0.74633	0.10132	0.74633	0.09112	0.74633	0.07932
0.75653	0.10141	0.75653	0.09121	0.75653	0.07941
0.74506	0.10172	0.74506	0.09152	0.74506	0.07972
0.75958	0.10185	0.75958	0.09165	0.75958	0.07985
0.75116	0.10207	0.75116	0.09187	0.75116	0.08007
0.75414	0.1022	0.75414	0.092	0.75414	0.0802
0.7657	0.10238	0.7657	0.09218	0.7657	0.08038
0.75587	0.1026	0.75587	0.0924	0.75587	0.0806
0.76378	0.10273	0.76378	0.09253	0.76378	0.08073
0.76927	0.10299	0.76927	0.09279	0.76927	0.08099
0.75908	0.10312	0.75908	0.09292	0.75908	0.08112
0.77258	0.10325	0.77258	0.09305	0.77258	0.08125
0.76554	0.10352	0.76554	0.09332	0.76554	0.08152
0.76335	0.10365	0.76335	0.09345	0.76335	0.08165
0.7805	0.10387	0.7805	0.09367	0.7805	0.08187
0.77241	0.10404	0.77241	0.09384	0.77241	0.08204
0.78729	0.10426	0.78729	0.09406	0.78729	0.08226
0.78001	0.10439	0.78001	0.09419	0.78001	0.08239
0.77128	0.10453	0.77128	0.09433	0.77128	0.08253
0.79026	0.10479	0.79026	0.09459	0.79026	0.08279
0.77657	0.10492	0.77657	0.09472	0.77657	0.08292
0.77814	0.10505	0.77814	0.09485	0.77814	0.08305
0.79299	0.10532	0.79299	0.09512	0.79299	0.08332
0.78318	0.10545	0.78318	0.09525	0.78318	0.08345
0.79566	0.10567	0.79566	0.09547	0.79566	0.08367
0.79752	0.10584	0.79752	0.09564	0.79752	0.08384
0.79458	0.10597	0.79458	0.09577	0.79458	0.08397
0.79513	0.10624	0.79513	0.09604	0.79513	0.08424
0.80148	0.10632	0.80148	0.09612	0.80148	0.08432
0.79315	0.10663	0.79315	0.09643	0.79315	0.08463
0.8029	0.10676	0.8029	0.09656	0.8029	0.08476
0.81238	0.10689	0.81238	0.09669	0.81238	0.08489
0.8058	0.10711	0.8058	0.09691	0.8058	0.08511
0.81556	0.10725	0.81556	0.09705	0.81556	0.08525
0.81444	0.10738	0.81444	0.09718	0.81444	0.08538
0.81492	0.10764	0.81492	0.09744	0.81492	0.08564
0.82083	0.10777	0.82083	0.09757	0.82083	0.08577
0.80827	0.10804	0.80827	0.09784	0.80827	0.08604
0.82409	0.10812	0.82409	0.09792	0.82409	0.08612
0.81058	0.10839	0.81058	0.09819	0.81058	0.08639
0.81135	0.10852	0.81135	0.09832	0.81135	0.08652
0.82855	0.10865	0.82855	0.09845	0.82855	0.08665
0.81398	0.10891	0.81398	0.09871	0.81398	0.08691
0.82735	0.10904	0.82735	0.09884	0.82735	0.08704
0.81615	0.10926	0.81615	0.09906	0.81615	0.08726
0.82995	0.10939	0.82995	0.09919	0.82995	0.08739
0.83196	0.10953	0.83196	0.09933	0.83196	0.08753
0.82172	0.10979	0.82172	0.09959	0.82172	0.08779
0.84103	0.10992	0.84103	0.09972	0.84103	0.08792
0.83183	0.11018	0.83183	0.09998	0.83183	0.08818
0.82283	0.11032	0.82283	0.10012	0.82283	0.08832
0.83938	0.1104	0.83938	0.1002	0.83938	0.0884
0.82293	0.11067	0.82293	0.10047	0.82293	0.08867
0.83016	0.1108	0.83016	0.1006	0.83016	0.0888
0.83899	0.11106	0.83899	0.10086	0.83899	0.08906
0.83281	0.11119	0.83281	0.10099	0.83281	0.08919
0.84569	0.11132	0.84569	0.10112	0.84569	0.08932
0.83573	0.11154	0.83573	0.10134	0.83573	0.08954
0.83903	0.11168	0.83903	0.10148	0.83903	0.08968
0.85534	0.11198	0.85534	0.10178	0.85534	0.08998
0.84364	0.11211	0.84364	0.10191	0.84364	0.09011
0.84884	0.1122	0.84884	0.102	0.84884	0.0902
0.85324	0.11246	0.85324	0.10226	0.85324	0.09046
0.8409	0.1126	0.8409	0.1024	0.8409	0.0906
0.86178	0.11282	0.86178	0.10262	0.86178	0.09082
0.85471	0.11299	0.85471	0.10279	0.85471	0.09099
0.86787	0.11321	0.86787	0.10301	0.86787	0.09121
0.85774	0.11334	0.85774	0.10314	0.85774	0.09134
0.85564	0.11347	0.85564	0.10327	0.85564	0.09147
0.87113	0.11374	0.87113	0.10354	0.87113	0.09174
0.85911	0.11382	0.85911	0.10362	0.85911	0.09182
0.87236	0.11413	0.87236	0.10393	0.87236	0.09213
0.88418	0.11426	0.88418	0.10406	0.88418	0.09226
0.87782	0.11439	0.87782	0.10419	0.87782	0.09239
0.88812	0.11461	0.88812	0.10441	0.88812	0.09261
0.88574	0.11475	0.88574	0.10455	0.88574	0.09275
0.8759	0.11488	0.8759	0.10468	0.8759	0.09288
0.89146	0.1151	0.89146	0.1049	0.89146	0.0931
0.87983	0.11523	0.87983	0.10503	0.87983	0.09323
0.89427	0.11549	0.89427	0.10529	0.89427	0.09349
0.87778	0.11558	0.87778	0.10538	0.87778	0.09358
0.88476	0.11571	0.88476	0.10551	0.88476	0.09371
0.89491	0.11597	0.89491	0.10577	0.89491	0.09397
0.88467	0.11611	0.88467	0.10591	0.88467	0.09411
0.90622	0.11632	0.90622	0.10612	0.90622	0.09432
0.88991	0.11646	0.88991	0.10626	0.88991	0.09446
0.91082	0.11668	0.91082	0.10648	0.91082	0.09467
0.89432	0.11681	0.89432	0.10661	0.89432	0.09481
0.89482	0.11694	0.89482	0.10674	0.89482	0.09494
0.90927	0.1172	0.90927	0.107	0.90927	0.0952
0.90229	0.11729	0.90229	0.10709	0.90229	0.09529
0.91364	0.11755	0.91364	0.10735	0.91364	0.09555
0.8979	0.11768	0.8979	0.10748	0.8979	0.09568
0.91711	0.11777	0.91711	0.10757	0.91711	0.09577
0.90479	0.11803	0.90479	0.10783	0.90479	0.09603
0.90623	0.11817	0.90623	0.10797	0.90623	0.09617
0.91046	0.11839	0.91046	0.10819	0.91046	0.09639
0.91336	0.11852	0.91336	0.10832	0.91336	0.09652
0.90876	0.11874	0.90876	0.10854	0.90876	0.09674
0.91086	0.11887	0.91086	0.10867	0.91086	0.09687
0.92875	0.119	0.92875	0.1088	0.92875	0.097
0.91681	0.11922	0.91681	0.10902	0.91681	0.09722
0.93321	0.11935	0.93321	0.10915	0.93321	0.09735
0.93285	0.11953	0.93285	0.10933	0.93285	0.09753
0.92085	0.11975	0.92085	0.10955	0.92085	0.09775
0.93598	0.11988	0.93598	0.10968	0.93598	0.09788
0.92073	0.1201	0.92073	0.1099	0.92073	0.0981
0.93751	0.12027	0.93751	0.11007	0.93751	0.09827
0.92674	0.12049	0.92674	0.11029	0.92674	0.09849
0.94024	0.12062	0.94024	0.11042	0.94024	0.09862
0.9398	0.12075	0.9398	0.11055	0.9398	0.09875
0.94068	0.12097	0.94068	0.11077	0.94068	0.09897
0.94924	0.1211	0.94924	0.1109	0.94924	0.0991
0.93782	0.12124	0.93782	0.11104	0.93782	0.09924
0.95289	0.12146	0.95289	0.11126	0.95289	0.09946
0.94798	0.12159	0.94798	0.11139	0.94798	0.09959
0.95152	0.12185	0.95152	0.11165	0.95152	0.09985
0.94807	0.12194	0.94807	0.11174	0.94807	0.09994
0.95811	0.1222	0.95811	0.112	0.95811	0.1002
0.96484	0.12233	0.96484	0.11213	0.96484	0.10033
0.95745	0.12246	0.95745	0.11226	0.95745	0.10046
0.96911	0.12268	0.96911	0.11248	0.96911	0.10068
0.95261	0.12277	0.95261	0.11257	0.95261	0.10077
0.97356	0.12299	0.97356	0.11279	0.97356	0.10099
0.95583	0.12312	0.95583	0.11292	0.95583	0.10112
0.95982	0.12325	0.95982	0.11305	0.95982	0.10125
0.95883	0.12347	0.95883	0.11327	0.95883	0.10147
0.95973	0.1236	0.95973	0.1134	0.95973	0.1016
0.9744	0.12387	0.9744	0.11367	0.9744	0.10187
0.9683	0.12396	0.9683	0.11376	0.9683	0.10196
0.97735	0.12422	0.97735	0.11402	0.97735	0.10222
0.97006	0.12435	0.97006	0.11415	0.97006	0.10235
0.98302	0.12448	0.98302	0.11428	0.98302	0.10248
0.97302	0.12466	0.97302	0.11446	0.97302	0.10266
0.99026	0.12479	0.99026	0.11459	0.99026	0.10279
0.9814	0.12501	0.9814	0.11481	0.9814	0.10301
0.99437	0.12514	0.99437	0.11494	0.99437	0.10314
0.9866	0.12527	0.9866	0.11507	0.9866	0.10327
0.99723	0.12554	0.99723	0.11534	0.99723	0.10354
0.98299	0.12558	0.98299	0.11538	0.98299	0.10358
1.00322	0.12584	1.00322	0.11564	1.00322	0.10384
0.99777	0.12597	0.99777	0.11577	0.99777	0.10397
1.00488	0.12619	1.00488	0.11599	1.00488	0.10419
0.99416	0.12632	0.99416	0.11612	0.99416	0.10432
0.98999	0.12646	0.98999	0.11626	0.98999	0.10446
1.00739	0.12672	1.00739	0.11652	1.00739	0.10472
0.98991	0.12676	0.98991	0.11656	0.98991	0.10476
1.00546	0.12703	1.00546	0.11683	1.00546	0.10503
0.98882	0.12716	0.98882	0.11696	0.98882	0.10516
1.00627	0.12738	1.00627	0.11718	1.00627	0.10538
0.99255	0.12751	0.99255	0.11731	0.99255	0.10551
0.99222	0.12764	0.99222	0.11744	0.99222	0.10564
0.99086	0.12786	0.99086	0.11766	0.99086	0.10586
0.99389	0.12799	0.99389	0.11779	0.99389	0.10599
1.01042	0.12812	1.01042	0.11792	1.01042	0.10612
0.9938	0.12839	0.9938	0.11819	0.9938	0.10639
1.00876	0.12852	1.00876	0.11832	1.00876	0.10652
1.00429	0.12878	1.00429	0.11858	1.00429	0.10678
1.00735	0.12887	1.00735	0.11867	1.00735	0.10687
1.00569	0.12913	1.00569	0.11893	1.00569	0.10713
1.00064	0.12926	1.00064	0.11906	1.00064	0.10726
1.02059	0.12935	1.02059	0.11915	1.02059	0.10735
1.00981	0.12961	1.00981	0.11941	1.00981	0.10761
1.01038	0.12975	1.01038	0.11955	1.01038	0.10775
1.01155	0.12996	1.01155	0.11976	1.01155	0.10796
1.011	0.1301	1.011	0.1199	1.011	0.1081
1.02689	0.13027	1.02689	0.12007	1.02689	0.10827
1.02248	0.13053	1.02248	0.12033	1.02248	0.10853
1.02917	0.13062	1.02917	0.12042	1.02917	0.10862
1.0246	0.13089	1.0246	0.12069	1.0246	0.10889
1.02102	0.13102	1.02102	0.12082	1.02102	0.10902
1.0348	0.13115	1.0348	0.12095	1.0348	0.10915
1.02553	0.13137	1.02553	0.12117	1.02553	0.10937
1.03565	0.1315	1.03565	0.1213	1.03565	0.1095
1.04663	0.13163	1.04663	0.12143	1.04663	0.10963
1.03943	0.13185	1.03943	0.12165	1.03943	0.10985
1.05302	0.13198	1.05302	0.12178	1.05302	0.10998
1.03628	0.13225	1.03628	0.12205	1.03628	0.11025
1.0519	0.13233	1.0519	0.12213	1.0519	0.11033
1.03732	0.1326	1.03732	0.1224	1.03732	0.1106
1.0451	0.13273	1.0451	0.12253	1.0451	0.11073
1.05904	0.13286	1.05904	0.12266	1.05904	0.11086
1.05037	0.13308	1.05037	0.12288	1.05037	0.11108
1.06254	0.13321	1.06254	0.12301	1.06254	0.11121
1.05376	0.13343	1.05376	0.12323	1.05376	0.11143
1.06727	0.13356	1.06727	0.12336	1.06727	0.11156
1.06332	0.13369	1.06332	0.12349	1.06332	0.11169
1.07079	0.13391	1.07079	0.12371	1.07079	0.11191
1.06818	0.13404	1.06818	0.12384	1.06818	0.11204
1.06333	0.13431	1.06333	0.12411	1.06333	0.11231
1.0631	0.13439	1.0631	0.12419	1.0631	0.11239
1.05894	0.13448	1.05894	0.12428	1.05894	0.11248
1.07194	0.13479	1.07194	0.12459	1.07194	0.11279
1.06456	0.13492	1.06456	0.12472	1.06456	0.11292
1.07862	0.13514	1.07862	0.12494	1.07862	0.11314
1.08266	0.13527	1.08266	0.12507	1.08266	0.11327
1.08704	0.13549	1.08704	0.12529	1.08704	0.11349
1.08321	0.13562	1.08321	0.12542	1.08321	0.11362
1.07086	0.13575	1.07086	0.12555	1.07086	0.11375
1.08526	0.13597	1.08526	0.12577	1.08526	0.11397
1.0712	0.1361	1.0712	0.1259	1.0712	0.1141
1.09165	0.13637	1.09165	0.12617	1.09165	0.11437
1.07586	0.13646	1.07586	0.12626	1.07586	0.11446
1.07931	0.13659	1.07931	0.12639	1.07931	0.11459
1.09267	0.13685	1.09267	0.12665	1.09267	0.11485
1.08399	0.13698	1.08399	0.12678	1.08399	0.11498
1.09481	0.1372	1.09481	0.127	1.09481	0.1152
1.08437	0.13733	1.08437	0.12713	1.08437	0.11533
1.10546	0.13755	1.10546	0.12735	1.10546	0.11555
1.08766	0.13768	1.08766	0.12748	1.08766	0.11568
1.08997	0.13782	1.08997	0.12762	1.08997	0.11582
1.10624	0.13808	1.10624	0.12788	1.10624	0.11608
1.09357	0.13817	1.09357	0.12797	1.09357	0.11617
1.10661	0.1383	1.10661	0.1281	1.10661	0.1163
1.09118	0.13856	1.09118	0.12836	1.09118	0.11656
1.11007	0.13865	1.11007	0.12845	1.11007	0.11665
1.09775	0.13891	1.09775	0.12871	1.09775	0.11691
1.10077	0.13904	1.10077	0.12884	1.10077	0.11704
1.0998	0.13926	1.0998	0.12906	1.0998	0.11726
1.10387	0.13939	1.10387	0.12919	1.10387	0.11739
1.12039	0.13953	1.12039	0.12933	1.12039	0.11753
1.1124	0.13975	1.1124	0.12955	1.1124	0.11775
1.13008	0.13988	1.13008	0.12968	1.13008	0.11788
1.11205	0.14014	1.11205	0.12994	1.11205	0.11814
1.13149	0.14023	1.13149	0.13003	1.13149	0.11823
1.12726	0.14036	1.12726	0.13016	1.12726	0.11836
1.12938	0.14062	1.12938	0.13042	1.12938	0.11862
1.12668	0.14071	1.12668	0.13051	1.12668	0.11871
1.13243	0.14097	1.13243	0.13077	1.13243	0.11897
1.13828	0.14111	1.13828	0.13091	1.13828	0.11911
1.1402	0.14132	1.1402	0.13112	1.1402	0.11932
1.14309	0.14141	1.14309	0.13121	1.14309	0.11941
1.12548	0.14154	1.12548	0.13134	1.12548	0.11954
1.14687	0.14176	1.14687	0.13156	1.14687	0.11976
1.13164	0.14189	1.13164	0.13169	1.13164	0.11989
1.13504	0.14203	1.13504	0.13183	1.13504	0.12003
1.13146	0.14225	1.13146	0.13205	1.13146	0.12025
1.14397	0.14238	1.14397	0.13218	1.14397	0.12038
1.14487	0.14264	1.14487	0.13244	1.14487	0.12064
1.143	0.14277	1.143	0.13257	1.143	0.12077
1.1476	0.14299	1.1476	0.13279	1.1476	0.12099
1.14662	0.14308	1.14662	0.13288	1.14662	0.12108
1.16244	0.14321	1.16244	0.13301	1.16244	0.12121
1.14972	0.14343	1.14972	0.13323	1.14972	0.12143
1.1676	0.14356	1.1676	0.13336	1.1676	0.12156
1.15927	0.14378	1.15927	0.13358	1.15927	0.12178
1.16858	0.14391	1.16858	0.13371	1.16858	0.12191
1.15549	0.14404	1.15549	0.13384	1.15549	0.12204
1.17519	0.14426	1.17519	0.13406	1.17519	0.12226
1.16168	0.14435	1.16168	0.13415	1.16168	0.12235
1.18548	0.14461	1.18548	0.13441	1.18548	0.12261
1.16729	0.14475	1.16729	0.13455	1.16729	0.12275
1.18092	0.14492	1.18092	0.13472	1.18092	0.12292
1.17315	0.14505	1.17315	0.13485	1.17315	0.12305
1.18598	0.14518	1.18598	0.13498	1.18598	0.12318
1.17912	0.14536	1.17912	0.13516	1.17912	0.12336
1.19314	0.14549	1.19314	0.13529	1.19314	0.12349
1.18374	0.14575	1.18374	0.13555	1.18374	0.12375
1.19891	0.1458	1.19891	0.1356	1.19891	0.1238
1.19805	0.14606	1.19805	0.13586	1.19805	0.12406
1.19976	0.14615	1.19976	0.13595	1.19976	0.12415
1.20418	0.14637	1.20418	0.13617	1.20418	0.12437
1.18567	0.14646	1.18567	0.13626	1.18567	0.12446
1.20637	0.14672	1.20637	0.13652	1.20637	0.12472
1.18679	0.14681	1.18679	0.13661	1.18679	0.12481
1.20642	0.14694	1.20642	0.13674	1.20642	0.12494
1.19628	0.14716	1.19628	0.13696	1.19628	0.12516
1.21391	0.14725	1.21391	0.13705	1.21391	0.12525
1.20103	0.14746	1.20103	0.13726	1.20103	0.12546
1.21519	0.1476	1.21519	0.1374	1.21519	0.1256
1.21785	0.14777	1.21785	0.13757	1.21785	0.12577
1.21599	0.1479	1.21599	0.1377	1.21599	0.1259
1.20366	0.14803	1.20366	0.13783	1.20366	0.12603
1.20651	0.14825	1.20651	0.13805	1.20651	0.12625
1.20842	0.14834	1.20842	0.13814	1.20842	0.12634
1.21597	0.14861	1.21597	0.13841	1.21597	0.12661
1.20706	0.14869	1.20706	0.13849	1.20706	0.12669
1.20687	0.14891	1.20687	0.13871	1.20687	0.12691
1.22694	0.149	1.22694	0.1388	1.22694	0.127
1.21626	0.14922	1.21626	0.13902	1.21626	0.12722
1.23218	0.14935	1.23218	0.13915	1.23218	0.12735
1.21647	0.14961	1.21647	0.13941	1.21647	0.12761
1.23584	0.14966	1.23584	0.13946	1.23584	0.12766
1.22857	0.14992	1.22857	0.13972	1.22857	0.12792
1.24038	0.15005	1.24038	0.13985	1.24038	0.12805
1.2238	0.15014	1.2238	0.13994	1.2238	0.12814
1.23463	0.15036	1.23463	0.14016	1.23463	0.12836
1.22604	0.15045	1.22604	0.14025	1.22604	0.12845
1.23288	0.15067	1.23288	0.14047	1.23288	0.12867
1.24469	0.1508	1.24469	0.1406	1.24469	0.1288
1.23885	0.15102	1.23885	0.14082	1.23885	0.12902
1.25196	0.15115	1.25196	0.14095	1.25196	0.12915
1.23831	0.15119	1.23831	0.14099	1.23831	0.12919
1.25808	0.15146	1.25808	0.14126	1.25808	0.12946
1.24779	0.15154	1.24779	0.14134	1.24779	0.12954
1.25648	0.15176	1.25648	0.14156	1.25648	0.12976
1.24933	0.15185	1.24933	0.14165	1.24933	0.12985
1.25092	0.15207	1.25092	0.14187	1.25092	0.13007
1.262	0.1522	1.262	0.142	1.262	0.1302
1.25942	0.15238	1.25942	0.14218	1.25942	0.13038
1.27034	0.15246	1.27034	0.14226	1.27034	0.13046
1.26947	0.15273	1.26947	0.14253	1.26947	0.13073
1.27562	0.15282	1.27562	0.14262	1.27562	0.13082
1.26442	0.1529	1.26442	0.1427	1.26442	0.1309
1.26501	0.15312	1.26501	0.14292	1.26501	0.13112
1.2745	0.15325	1.2745	0.14305	1.2745	0.13125
1.26844	0.15343	1.26844	0.14323	1.26844	0.13143
1.28428	0.15356	1.28428	0.14336	1.28428	0.13156
1.26798	0.15378	1.26798	0.14358	1.26798	0.13178
1.27829	0.15387	1.27829	0.14367	1.27829	0.13187
1.27155	0.15396	1.27155	0.14376	1.27155	0.13196
1.28279	0.15422	1.28279	0.14402	1.28279	0.13222
1.29258	0.15426	1.29258	0.14406	1.29258	0.13226
1.27363	0.15453	1.27363	0.14433	1.27363	0.13253
1.29466	0.15461	1.29466	0.14441	1.29466	0.13261
1.28429	0.15483	1.28429	0.14463	1.28429	0.13283
1.29771	0.15496	1.29771	0.14476	1.29771	0.13296
1.27884	0.15505	1.27884	0.14485	1.27884	0.13305
1.2898	0.15527	1.2898	0.14507	1.2898	0.13327
1.28472	0.15536	1.28472	0.14516	1.28472	0.13336
1.30117	0.15562	1.30117	0.14542	1.30117	0.13362
1.29604	0.15571	1.29604	0.14551	1.29604	0.13371
1.30634	0.1558	1.30634	0.1456	1.30634	0.1338
1.29686	0.15606	1.29686	0.14586	1.29686	0.13406
1.29711	0.15615	1.29711	0.14595	1.29711	0.13415
1.31384	0.15637	1.31384	0.14617	1.31384	0.13437
1.31142	0.1565	1.31142	0.1463	1.31142	0.1345
1.32425	0.15668	1.32425	0.14648	1.32425	0.13468
1.30473	0.15681	1.30473	0.14661	1.30473	0.13481
1.3266	0.15689	1.3266	0.14669	1.3266	0.13489
1.31578	0.15711	1.31578	0.14691	1.31578	0.13511
1.32874	0.1572	1.32874	0.147	1.32874	0.1352
1.32604	0.15746	1.32604	0.14726	1.32604	0.13546
1.33896	0.15755	1.33896	0.14735	1.33896	0.13555
1.324	0.15764	1.324	0.14744	1.324	0.13564
1.32619	0.15786	1.32619	0.14766	1.32619	0.13586
1.32871	0.15799	1.32871	0.14779	1.32871	0.13599
1.32666	0.15817	1.32666	0.14797	1.32666	0.13617
1.34334	0.1583	1.34334	0.1481	1.34334	0.1363
1.32981	0.15839	1.32981	0.14819	1.32981	0.13639
1.3346	0.15856	1.3346	0.14836	1.3346	0.13656
1.33444	0.15869	1.33444	0.14849	1.33444	0.13669
1.33229	0.15887	1.33229	0.14867	1.33229	0.13687
1.35133	0.159	1.35133	0.1488	1.35133	0.137
1.33428	0.15909	1.33428	0.14889	1.33428	0.13709
1.35224	0.15931	1.35224	0.14911	1.35224	0.13731
1.33646	0.15939	1.33646	0.14919	1.33646	0.13739
1.33767	0.15961	1.33767	0.14941	1.33767	0.13761
1.34329	0.15975	1.34329	0.14955	1.34329	0.13775
1.34623	0.15992	1.34623	0.14972	1.34623	0.13792
1.36349	0.16005	1.36349	0.14985	1.36349	0.13805
1.3464	0.16014	1.3464	0.14994	1.3464	0.13814
1.36001	0.16036	1.36001	0.15016	1.36001	0.13836
1.35436	0.16045	1.35436	0.15025	1.35436	0.13845
1.37272	0.16058	1.37272	0.15038	1.37272	0.13858
1.37334	0.16075	1.37334	0.15055	1.37334	0.13875
1.3589	0.16089	1.3589	0.15069	1.3589	0.13889
1.37717	0.1611	1.37717	0.1509	1.37717	0.1391
1.35878	0.16115	1.35878	0.15095	1.35878	0.13915
1.37035	0.16141	1.37035	0.15121	1.37035	0.13941
1.3683	0.1615	1.3683	0.1513	1.3683	0.1395
1.38381	0.16163	1.38381	0.15143	1.38381	0.13963
1.38567	0.16181	1.38567	0.15161	1.38567	0.13981
1.36967	0.16189	1.36967	0.15169	1.36967	0.13989
1.37822	0.16211	1.37822	0.15191	1.37822	0.14011
1.37815	0.1622	1.37815	0.152	1.37815	0.1402
1.39407	0.16233	1.39407	0.15213	1.39407	0.14033
1.39879	0.16251	1.39879	0.15231	1.39879	0.14051
1.38236	0.1626	1.38236	0.1524	1.38236	0.1406
1.40247	0.16282	1.40247	0.15262	1.40247	0.14082
1.3862	0.16295	1.3862	0.15275	1.3862	0.14095
1.40492	0.16299	1.40492	0.15279	1.40492	0.14099
1.40943	0.16321	1.40943	0.15301	1.40943	0.14121
1.40661	0.16334	1.40661	0.15314	1.40661	0.14134
1.41242	0.16352	1.41242	0.15332	1.41242	0.14152
1.40156	0.1636	1.40156	0.1534	1.40156	0.1416
1.40216	0.16378	1.40216	0.15358	1.40216	0.14178
1.42162	0.16391	1.42162	0.15371	1.42162	0.14191
1.40552	0.164	1.40552	0.1538	1.40552	0.142
1.40639	0.16417	1.40639	0.15398	1.40639	0.14218
1.42096	0.16431	1.42096	0.15411	1.42096	0.14231
1.41885	0.16448	1.41885	0.15428	1.41885	0.14248
1.43821	0.16461	1.43821	0.15441	1.43821	0.14261
1.41798	0.16466	1.41798	0.15446	1.41798	0.14266
1.41939	0.16488	1.41939	0.15468	1.41939	0.14288
1.43647	0.16496	1.43647	0.15476	1.43647	0.14296
1.43485	0.16514	1.43485	0.15494	1.43485	0.14314
1.43321	0.16527	1.43321	0.15507	1.43321	0.14327
1.43509	0.16545	1.43509	0.15525	1.43509	0.14345
1.43076	0.16554	1.43076	0.15534	1.43076	0.14354
1.44975	0.16562	1.44975	0.15542	1.44975	0.14362
1.45163	0.16584	1.45163	0.15564	1.45163	0.14384
1.43432	0.16589	1.43432	0.15569	1.43432	0.14389
1.45128	0.16602	1.45128	0.15582	1.45128	0.14402
1.44487	0.16624	1.44487	0.15604	1.44487	0.14424
1.43472	0.16628	1.43472	0.15608	1.43472	0.14428
1.45837	0.1665	1.45837	0.1563	1.45837	0.1445
1.44476	0.16659	1.44476	0.15639	1.44476	0.14459
1.44727	0.16676	1.44727	0.15656	1.44727	0.14476
1.46625	0.16685	1.46625	0.15665	1.46625	0.14485
1.45142	0.16698	1.45142	0.15678	1.45142	0.14498
1.45148	0.16711	1.45148	0.15691	1.45148	0.14511
1.46573	0.16725	1.46573	0.15705	1.46573	0.14525
1.44844	0.16733	1.44844	0.15713	1.44844	0.14533
1.46714	0.16755	1.46714	0.15735	1.46714	0.14555
1.47258	0.1676	1.47258	0.1574	1.47258	0.1456
1.45795	0.16782	1.45795	0.15762	1.45795	0.14582
1.47456	0.1679	1.47456	0.1577	1.47456	0.1459
1.47803	0.16808	1.47803	0.15788	1.47803	0.14608
1.46158	0.16817	1.46158	0.15797	1.46158	0.14617
1.47854	0.1683	1.47854	0.1581	1.47854	0.1463
1.48419	0.16847	1.48419	0.15827	1.48419	0.14647
1.4655	0.16856	1.4655	0.15836	1.4655	0.14656
1.48065	0.16878	1.48065	0.15858	1.48065	0.14678
1.48578	0.16882	1.48578	0.15862	1.48578	0.14682
1.47302	0.16891	1.47302	0.15871	1.47302	0.14691
1.49115	0.16913	1.49115	0.15893	1.49115	0.14713
1.47725	0.16922	1.47725	0.15902	1.47725	0.14722
1.47794	0.16939	1.47794	0.15919	1.47794	0.14739
1.49821	0.16953	1.49821	0.15933	1.49821	0.14753
1.47623	0.16961	1.47623	0.15941	1.47623	0.14761
1.47869	0.16979	1.47869	0.15959	1.47869	0.14779
1.49986	0.16988	1.49986	0.15968	1.49986	0.14788
1.49888	0.17005	1.49888	0.15985	1.49888	0.14805
1.4854	0.17014	1.4854	0.15994	1.4854	0.14814
1.49374	0.17027	1.49374	0.16007	1.49374	0.14827
1.49849	0.17045	1.49849	0.16025	1.49849	0.14845
1.50393	0.17054	1.50393	0.16034	1.50393	0.14854
1.50993	0.17071	1.50993	0.16051	1.50993	0.14871
1.48927	0.17084	1.48927	0.16064	1.48927	0.14884
1.49394	0.17102	1.49394	0.16082	1.49394	0.14902
1.51219	0.17111	1.51219	0.16091	1.51219	0.14911
1.49645	0.17119	1.49645	0.16099	1.49645	0.14919
1.49565	0.17137	1.49565	0.16117	1.49565	0.14937
1.51294	0.17146	1.51294	0.16126	1.51294	0.14946
1.51425	0.17159	1.51425	0.16139	1.51425	0.14959
1.5188	0.17176	1.5188	0.16156	1.5188	0.14976
1.50272	0.17185	1.50272	0.16165	1.50272	0.14985
1.50781	0.17207	1.50781	0.16187	1.50781	0.15007
1.52379	0.17211	1.52379	0.16191	1.52379	0.15011
1.52546	0.17233	1.52546	0.16213	1.52546	0.15033
1.51051	0.17242	1.51051	0.16222	1.51051	0.15042
1.51452	0.17255	1.51452	0.16235	1.51452	0.15055
1.52417	0.17273	1.52417	0.16253	1.52417	0.15073
1.53373	0.17282	1.53373	0.16262	1.53373	0.15082
1.53248	0.17299	1.53248	0.16279	1.53248	0.15099
1.51568	0.17308	1.51568	0.16288	1.51568	0.15108
1.53292	0.17321	1.53292	0.16301	1.53292	0.15121
1.54015	0.17339	1.54015	0.16319	1.54015	0.15139
1.519	0.17347	1.519	0.16327	1.519	0.15147
1.53014	0.17369	1.53014	0.16349	1.53014	0.15169
1.52858	0.17378	1.52858	0.16358	1.52858	0.15178
1.52497	0.17382	1.52497	0.16362	1.52497	0.15182
1.54695	0.17404	1.54695	0.16384	1.54695	0.15204
1.527	0.17413	1.527	0.16393	1.527	0.15213
1.52912	0.17431	1.52912	0.16411	1.52912	0.15231
1.55069	0.17444	1.55069	0.16424	1.55069	0.15244
1.53504	0.17453	1.53504	0.16433	1.53504	0.15253
1.53391	0.1747	1.53391	0.1645	1.53391	0.1527
1.55475	0.17479	1.55475	0.16459	1.55475	0.15279
1.54099	0.17501	1.54099	0.16481	1.54099	0.15301
1.5478	0.1751	1.5478	0.1649	1.5478	0.1531
1.55526	0.17527	1.55526	0.16507	1.55526	0.15327
1.54229	0.1754	1.54229	0.1652	1.54229	0.1534
1.56397	0.17545	1.56397	0.16525	1.56397	0.15345
1.56559	0.17567	1.56559	0.16547	1.56559	0.15367
1.55082	0.17575	1.55082	0.16555	1.55082	0.15375
1.55277	0.17593	1.55277	0.16573	1.55277	0.15393
1.56002	0.17606	1.56002	0.16586	1.56002	0.15406
1.57319	0.17615	1.57319	0.16595	1.57319	0.15415
1.57332	0.17637	1.57332	0.16617	1.57332	0.15437
1.55921	0.17641	1.55921	0.16621	1.55921	0.15441
1.57593	0.17654	1.57593	0.16634	1.57593	0.15454
1.57789	0.17672	1.57789	0.16652	1.57789	0.15472
1.5675	0.17685	1.5675	0.16665	1.5675	0.15485
1.56188	0.17698	1.56188	0.16678	1.56188	0.15498
1.56867	0.17711	1.56867	0.16691	1.56867	0.15511
1.58374	0.1772	1.58374	0.167	1.58374	0.1552
1.58301	0.17738	1.58301	0.16718	1.58301	0.15538
1.57102	0.17746	1.57102	0.16726	1.57102	0.15546
1.57721	0.17768	1.57721	0.16748	1.57721	0.15568
1.59419	0.17777	1.59419	0.16757	1.59419	0.15577
1.57642	0.17786	1.57642	0.16766	1.57642	0.15586
1.5873	0.17808	1.5873	0.16788	1.5873	0.15608
1.60065	0.17812	1.60065	0.16792	1.60065	0.15612
1.58592	0.17834	1.58592	0.16814	1.58592	0.15634
1.59738	0.17843	1.59738	0.16823	1.59738	0.15643
1.60455	0.17861	1.60455	0.16841	1.60455	0.15661
1.5889	0.17869	1.5889	0.16849	1.5889	0.15669
1.60119	0.17882	1.60119	0.16862	1.60119	0.15682
1.60706	0.17896	1.60706	0.16876	1.60706	0.15696
1.59126	0.17909	1.59126	0.16889	1.59126	0.15709
1.59517	0.17926	1.59517	0.16906	1.59517	0.15726
1.61248	0.17935	1.61248	0.16915	1.61248	0.15735
1.59794	0.17944	1.59794	0.16924	1.59794	0.15744
1.61421	0.17966	1.61421	0.16946	1.61421	0.15766
1.60032	0.17975	1.60032	0.16955	1.60032	0.15775
1.6047	0.17992	1.6047	0.16972	1.6047	0.15792
1.62237	0.18001	1.62237	0.16981	1.62237	0.15801
1.62754	0.18018	1.62754	0.16998	1.62754	0.15818
1.61179	0.18027	1.61179	0.17007	1.61179	0.15827
1.63085	0.1804	1.63085	0.1702	1.63085	0.1584
1.63287	0.18058	1.63287	0.17038	1.63287	0.15858
1.61886	0.18067	1.61886	0.17047	1.61886	0.15867
1.64067	0.18075	1.64067	0.17055	1.64067	0.15875
1.63559	0.18093	1.63559	0.17073	1.63559	0.15893
1.62621	0.18102	1.62621	0.17082	1.62621	0.15902
1.63135	0.18119	1.63135	0.17099	1.63135	0.15919
1.63388	0.18132	1.63388	0.17112	1.63388	0.15932
1.64545	0.18146	1.64545	0.17126	1.64545	0.15946
1.64249	0.18159	1.64249	0.17139	1.64249	0.15959
1.63385	0.18168	1.63385	0.17148	1.63385	0.15968
1.64378	0.18185	1.64378	0.17165	1.64378	0.15985
1.64169	0.18203	1.64169	0.17183	1.64169	0.16003
1.64473	0.18238	1.64473	0.17218	1.64473	0.16038
1.64897	0.18273	1.64897	0.17253	1.64897	0.16073
1.65238	0.1829	1.65238	0.1727	1.65238	0.1609
1.65379	0.18308	1.65379	0.17288	1.65379	0.16108
1.67276	0.18317	1.67276	0.17297	1.67276	0.16117
1.67054	0.18334	1.67054	0.17314	1.67054	0.16134
1.65678	0.18343	1.65678	0.17323	1.65678	0.16143
1.67723	0.18352	1.67723	0.17332	1.67723	0.16152
1.68601	0.18374	1.68601	0.17354	1.68601	0.16174
1.66834	0.18378	1.66834	0.17358	1.66834	0.16178
1.67123	0.18396	1.67123	0.17376	1.67123	0.16196
1.69021	0.18409	1.69021	0.17389	1.69021	0.16209
1.67529	0.18413	1.67529	0.17393	1.67529	0.16213
1.67555	0.18431	1.67555	0.17411	1.67555	0.16231
1.68903	0.18439	1.68903	0.17419	1.68903	0.16239
1.69177	0.18457	1.69177	0.17437	1.69177	0.16257
1.67928	0.18466	1.67928	0.17446	1.67928	0.16266
1.69538	0.18475	1.69538	0.17455	1.69538	0.16275
1.69613	0.18492	1.69613	0.17472	1.69613	0.16292
1.68433	0.18501	1.68433	0.17481	1.68433	0.16301
1.68706	0.18518	1.68706	0.17498	1.68706	0.16318
1.69688	0.18527	1.69688	0.17507	1.69688	0.16327
1.69896	0.18545	1.69896	0.17525	1.69896	0.16345
1.70533	0.1858	1.70533	0.1756	1.70533	0.1638
1.70852	0.18615	1.70852	0.17595	1.70852	0.16415
1.71516	0.1865	1.71516	0.1763	1.71516	0.1645
1.71802	0.18668	1.71802	0.17648	1.71802	0.16468
1.70576	0.18681	1.70576	0.17661	1.70576	0.16481
1.72342	0.18685	1.72342	0.17665	1.72342	0.16485
1.72642	0.18703	1.72642	0.17683	1.72642	0.16503
1.71078	0.18711	1.71078	0.17691	1.71078	0.16511
1.71437	0.18729	1.71437	0.17709	1.71437	0.16529
1.73374	0.18738	1.73374	0.17718	1.73374	0.16538
1.72285	0.18746	1.72285	0.17726	1.72285	0.16546
1.72589	0.18764	1.72589	0.17744	1.72589	0.16564
1.73995	0.18773	1.73995	0.17753	1.73995	0.16573
1.7404	0.1879	1.7404	0.1777	1.7404	0.1659
1.73596	0.18795	1.73596	0.17775	1.73596	0.16595
1.73602	0.18808	1.73602	0.17788	1.73602	0.16608
1.74151	0.18825	1.74151	0.17805	1.74151	0.16625
1.73153	0.18834	1.73153	0.17814	1.73153	0.16634
1.74443	0.18847	1.74443	0.17827	1.74443	0.16647
1.73939	0.18856	1.73939	0.17836	1.73939	0.16656
1.73879	0.18874	1.73879	0.17854	1.73879	0.16674
1.75874	0.18882	1.75874	0.17862	1.75874	0.16682
1.74091	0.18891	1.74091	0.17871	1.74091	0.16691
1.74548	0.18909	1.74548	0.17889	1.74548	0.16709
1.76039	0.18918	1.76039	0.17898	1.76039	0.16718
1.74133	0.18926	1.74133	0.17906	1.74133	0.16726
1.74315	0.18944	1.74315	0.17924	1.74315	0.16744
1.7578	0.18948	1.7578	0.17928	1.7578	0.16748
1.76257	0.1897	1.76257	0.1795	1.76257	0.1677
1.74519	0.18979	1.74519	0.17959	1.74519	0.16779
1.74901	0.18992	1.74901	0.17972	1.74901	0.16792
1.77092	0.19001	1.77092	0.17981	1.77092	0.16801
1.75202	0.19014	1.75202	0.17994	1.75202	0.16814
1.75957	0.19027	1.75957	0.18007	1.75957	0.16827
1.77347	0.19036	1.77347	0.18016	1.77347	0.16836
1.7599	0.19045	1.7599	0.18025	1.7599	0.16845
1.76317	0.19062	1.76317	0.18042	1.76317	0.16862
1.77901	0.19071	1.77901	0.18051	1.77901	0.16871
1.78134	0.19089	1.78134	0.18069	1.78134	0.16889
1.7702	0.19097	1.7702	0.18077	1.7702	0.16897
1.7739	0.19115	1.7739	0.18095	1.7739	0.16915
1.78228	0.19124	1.78228	0.18104	1.78228	0.16924
1.77431	0.19132	1.77431	0.18112	1.77431	0.16932
1.78563	0.19146	1.78563	0.18126	1.78563	0.16946
1.7751	0.19154	1.7751	0.18134	1.7751	0.16954
1.78037	0.19168	1.78037	0.18148	1.78037	0.16968
1.77833	0.19185	1.77833	0.18165	1.77833	0.16985
1.77626	0.19189	1.77626	0.18169	1.77626	0.16989
1.78438	0.19207	1.78438	0.18187	1.78438	0.17007
1.79337	0.19216	1.79337	0.18196	1.79337	0.17016
1.80096	0.19233	1.80096	0.18213	1.80096	0.17033
1.78498	0.19242	1.78498	0.18222	1.78498	0.17042
1.80277	0.19251	1.80277	0.18231	1.80277	0.17051
1.80454	0.19268	1.80454	0.18248	1.80454	0.17068
1.78865	0.19277	1.78865	0.18257	1.78865	0.17077
1.78784	0.19295	1.78784	0.18275	1.78784	0.17095
1.80906	0.19299	1.80906	0.18279	1.80906	0.17099
1.7925	0.19308	1.7925	0.18288	1.7925	0.17108
1.79924	0.1933	1.79924	0.1831	1.79924	0.1713
1.81791	0.19339	1.81791	0.18319	1.81791	0.17139
1.82111	0.19352	1.82111	0.18332	1.82111	0.17152
1.80431	0.1936	1.80431	0.1834	1.80431	0.1716
1.82101	0.19369	1.82101	0.18349	1.82101	0.17169
1.82258	0.19387	1.82258	0.18367	1.82258	0.17187
1.81109	0.19396	1.81109	0.18376	1.81109	0.17196
1.82654	0.19409	1.82654	0.18389	1.82654	0.17209
1.82081	0.19417	1.82081	0.18398	1.82081	0.17217
1.82533	0.19426	1.82533	0.18406	1.82533	0.17226
1.82576	0.19448	1.82576	0.18428	1.82576	0.17248
1.81789	0.19453	1.81789	0.18433	1.81789	0.17253
1.81572	0.1947	1.81572	0.1845	1.81572	0.1727
1.83685	0.19479	1.83685	0.18459	1.83685	0.17279
1.82361	0.19488	1.82361	0.18468	1.82361	0.17288
1.82808	0.19505	1.82808	0.18485	1.82808	0.17305
1.84797	0.19514	1.84797	0.18494	1.84797	0.17314
1.84911	0.19532	1.84911	0.18512	1.84911	0.17332
1.8353	0.19536	1.8353	0.18516	1.8353	0.17336
1.85086	0.19545	1.85086	0.18525	1.85086	0.17345
1.85246	0.19562	1.85246	0.18542	1.85246	0.17362
1.84286	0.19567	1.84286	0.18547	1.84286	0.17367
1.84079	0.19589	1.84079	0.18569	1.84079	0.17389
1.84972	0.19597	1.84972	0.18577	1.84972	0.17397
1.84193	0.1961	1.84193	0.1859	1.84193	0.1741
1.85587	0.19619	1.85587	0.18599	1.85587	0.17419
1.83972	0.19628	1.83972	0.18608	1.83972	0.17428
1.84301	0.19641	1.84301	0.18621	1.84301	0.17441
1.86099	0.1965	1.86099	0.1863	1.86099	0.1745
1.84575	0.19659	1.84575	0.18639	1.84575	0.17459
1.8507	0.19681	1.8507	0.18661	1.8507	0.17481
1.86731	0.19685	1.86731	0.18665	1.86731	0.17485
1.87581	0.19703	1.87581	0.18683	1.87581	0.17503
1.86214	0.19711	1.86214	0.18691	1.86214	0.17511
1.87165	0.19725	1.87165	0.18705	1.87165	0.17525
1.86884	0.19733	1.86884	0.18713	1.86884	0.17533
1.87626	0.19742	1.87626	0.18722	1.87626	0.17542
1.88136	0.1976	1.88136	0.1874	1.88136	0.1756
1.85994	0.19768	1.85994	0.18748	1.85994	0.17568
1.88227	0.19777	1.88227	0.18757	1.88227	0.17577
1.88424	0.1979	1.88424	0.1877	1.88424	0.1759
1.87076	0.19799	1.87076	0.18779	1.87076	0.17599
1.87216	0.19817	1.87216	0.18797	1.87216	0.17617
1.89294	0.19825	1.89294	0.18805	1.89294	0.17625
1.88288	0.19839	1.88288	0.18819	1.88288	0.17639
1.89184	0.19847	1.89184	0.18827	1.89184	0.17647
1.88506	0.19856	1.88506	0.18836	1.88506	0.17656
1.88271	0.19869	1.88271	0.18849	1.88271	0.17669
1.90152	0.19878	1.90152	0.18858	1.90152	0.17678
1.90665	0.19896	1.90665	0.18876	1.90665	0.17696
1.89324	0.19904	1.89324	0.18884	1.89324	0.17704
1.90345	0.19913	1.90345	0.18893	1.90345	0.17713
1.9057	0.19931	1.9057	0.18911	1.9057	0.17731
1.90953	0.19935	1.90953	0.18915	1.90953	0.17735
1.91437	0.19953	1.91437	0.18933	1.91437	0.17753
1.89871	0.19961	1.89871	0.18941	1.89871	0.17761
1.91705	0.19966	1.91705	0.18946	1.91705	0.17766
1.92155	0.19983	1.92155	0.18963	1.92155	0.17783
1.90764	0.19992	1.90764	0.18972	1.90764	0.17792
1.92562	0.20005	1.92562	0.18985	1.92562	0.17805
1.90539	0.20014	1.90539	0.18994	1.90539	0.17814
1.92975	0.20023	1.92975	0.19003	1.92975	0.17823
1.92611	0.2004	1.92611	0.1902	1.92611	0.1784
1.90992	0.20045	1.90992	0.19025	1.90992	0.17845
1.91484	0.20062	1.91484	0.19042	1.91484	0.17862
1.93045	0.20071	1.93045	0.19051	1.93045	0.17871
1.92033	0.2008	1.92033	0.1906	1.92033	0.1788
1.93669	0.20093	1.93669	0.19073	1.93669	0.17893
1.9225	0.20102	1.9225	0.19082	1.9225	0.17902
1.94152	0.20111	1.94152	0.19091	1.94152	0.17911
1.94047	0.20124	1.94047	0.19104	1.94047	0.17924
1.92575	0.20132	1.92575	0.19112	1.92575	0.17932
1.93199	0.2015	1.93199	0.1913	1.93199	0.1795
1.93055	0.20154	1.93055	0.19134	1.93055	0.17954
1.93707	0.20172	1.93707	0.19152	1.93707	0.17972
1.9547	0.20181	1.9547	0.19161	1.9547	0.17981
1.9395	0.20185	1.9395	0.19165	1.9395	0.17985
1.94695	0.20203	1.94695	0.19183	1.94695	0.18003
1.95176	0.20207	1.95176	0.19187	1.95176	0.18007
1.94818	0.20225	1.94818	0.19205	1.94818	0.18025
1.96444	0.20229	1.96444	0.19209	1.96444	0.18029
1.9527	0.20238	1.9527	0.19218	1.9527	0.18038
1.96451	0.20251	1.96451	0.19231	1.96451	0.18051
1.95981	0.2026	1.95981	0.1924	1.95981	0.1806
1.95621	0.20277	1.95621	0.19257	1.95621	0.18077
1.97448	0.20286	1.97448	0.19266	1.97448	0.18086
1.95452	0.2029	1.95452	0.1927	1.95452	0.1809
1.96078	0.20308	1.96078	0.19288	1.96078	0.18108
1.96373	0.20312	1.96373	0.19292	1.96373	0.18112
1.95941	0.20325	1.95941	0.19305	1.95941	0.18125
1.97931	0.20334	1.97931	0.19314	1.97931	0.18134
1.97179	0.20347	1.97179	0.19327	1.97179	0.18147
1.97469	0.20356	1.97469	0.19336	1.97469	0.18156
1.97108	0.20365	1.97108	0.19345	1.97108	0.18165
1.96766	0.20378	1.96766	0.19358	1.96766	0.18178
1.98403	0.20387	1.98403	0.19367	1.98403	0.18187
1.98797	0.20404	1.98797	0.19384	1.98797	0.18204
1.97238	0.20413	1.97238	0.19393	1.97238	0.18213
1.97648	0.20418	1.97648	0.19398	1.97648	0.18218
1.97911	0.20435	1.97911	0.19415	1.97911	0.18235
1.99629	0.20444	1.99629	0.19424	1.99629	0.18244
1.99677	0.20457	1.99677	0.19437	1.99677	0.18257
1.98572	0.20466	1.98572	0.19446	1.98572	0.18266
2.00221	0.20479	2.00221	0.19459	2.00221	0.18279
1.9859	0.20483	1.9859	0.19463	1.9859	0.18283
2.00665	0.20492	2.00665	0.19472	2.00665	0.18292
2.00421	0.2051	2.00421	0.1949	2.00421	0.1831
2.00055	0.20514	2.00055	0.19494	2.00055	0.18314
1.99537	0.20523	1.99537	0.19503	1.99537	0.18323
1.99252	0.2054	1.99252	0.1952	1.99252	0.1834
2.01224	0.20549	2.01224	0.19529	2.01224	0.18349
2.01025	0.20562	2.01025	0.19592	2.01025	0.18362
1.99942	0.20571	1.99942	0.19601	1.99942	0.18371
2.02085	0.20584	2.02085	0.19614	2.02085	0.18384
2.00459	0.20593	2.00459	0.19623	2.00459	0.18443
2.02516	0.20597	2.02516	0.19627	2.02516	0.18447
2.02497	0.20615	2.02497	0.19645	2.02497	0.18465
2.02024	0.20619	2.02024	0.19649	2.02024	0.18469
2.01682	0.20628	2.01682	0.19658	2.01682	0.18478
2.01457	0.20646	2.01457	0.19676	2.01457	0.18496
2.02972	0.2065	2.02972	0.1968	2.02972	0.185
2.02712	0.20668	2.02712	0.19698	2.02712	0.18518
2.02697	0.20672	2.02697	0.19702	2.02697	0.18522
2.03959	0.20685	2.03959	0.19715	2.03959	0.18535
2.02329	0.20694	2.02329	0.19724	2.02329	0.18544
2.03946	0.20707	2.03946	0.19737	2.03946	0.18557
2.0238	0.20716	2.0238	0.19746	2.0238	0.18566
2.04056	0.2072	2.04056	0.1975	2.04056	0.1857
2.04487	0.20738	2.04487	0.19768	2.04487	0.18588
2.0468	0.20742	2.0468	0.19772	2.0468	0.18592
2.04997	0.2076	2.04997	0.1979	2.04997	0.1861
2.03284	0.20764	2.03284	0.19794	2.03284	0.18614
2.04878	0.20777	2.04878	0.19807	2.04878	0.18627
2.03671	0.20786	2.03671	0.19816	2.03671	0.18636
2.03967	0.20799	2.03967	0.19829	2.03967	0.18649
2.05139	0.20803	2.05139	0.19833	2.05139	0.18653
2.04557	0.20821	2.04557	0.19851	2.04557	0.18671
2.06311	0.2083	2.06311	0.1986	2.06311	0.1868
2.05591	0.20839	2.05591	0.19869	2.05591	0.18689
2.05883	0.20847	2.05883	0.19877	2.05883	0.18697
2.05092	0.20856	2.05092	0.19886	2.05092	0.18706
2.0519	0.20869	2.0519	0.19899	2.0519	0.18719
2.0601	0.20874	2.0601	0.19904	2.0601	0.18724
2.05288	0.20891	2.05288	0.19921	2.05288	0.18741
2.05719	0.20904	2.05719	0.19934	2.05719	0.18754
2.06129	0.20909	2.06129	0.19939	2.06129	0.18759
2.05698	0.20922	2.05698	0.19952	2.05698	0.18772
2.07388	0.20931	2.07388	0.19961	2.07388	0.18781
2.06162	0.20939	2.06162	0.19969	2.06162	0.18789
2.07854	0.20953	2.07854	0.19983	2.07854	0.18803
2.06443	0.20957	2.06443	0.19987	2.06443	0.18807
2.0708	0.20975	2.0708	0.20005	2.0708	0.18825
2.07836	0.20979	2.07836	0.20009	2.07836	0.18829
2.0751	0.20992	2.0751	0.20022	2.0751	0.18842
2.09113	0.21001	2.09113	0.20031	2.09113	0.18851
2.08652	0.21014	2.08652	0.20044	2.08652	0.18864
2.09956	0.21023	2.09956	0.20053	2.09956	0.18873
2.09425	0.21032	2.09425	0.20062	2.09425	0.18882
2.10063	0.2104	2.10063	0.2007	2.10063	0.1889
2.10544	0.21053	2.10544	0.20083	2.10544	0.18903
2.09751	0.21058	2.09751	0.20088	2.09751	0.18908
2.09529	0.21067	2.09529	0.20097	2.09529	0.18917
2.09244	0.2108	2.09244	0.2011	2.09244	0.1893
2.10128	0.21084	2.10128	0.20114	2.10128	0.18934
2.099	0.21102	2.099	0.20132	2.099	0.18952
2.11474	0.21106	2.11474	0.20136	2.11474	0.18956
2.1037	0.21119	2.1037	0.20149	2.1037	0.18969
2.12044	0.21128	2.12044	0.20158	2.12044	0.18978
2.11752	0.21141	2.11752	0.20171	2.11752	0.18991
2.12026	0.21146	2.12026	0.20176	2.12026	0.18996
2.12328	0.21159	2.12328	0.20189	2.12328	0.19009
2.10304	0.21168	2.10304	0.20198	2.10304	0.19018
2.12542	0.21181	2.12542	0.20211	2.12542	0.19031
2.10915	0.21185	2.10915	0.20215	2.10915	0.19035
2.12858	0.21194	2.12858	0.20224	2.12858	0.19044
2.1123	0.21207	2.1123	0.20237	2.1123	0.19057
2.13152	0.21211	2.13152	0.20241	2.13152	0.19061
2.13487	0.21229	2.13487	0.20259	2.13487	0.19079
2.12712	0.21238	2.12712	0.20268	2.12712	0.19088
2.13855	0.21246	2.13855	0.20276	2.13855	0.19096
2.1208	0.21255	2.1208	0.20285	2.1208	0.19105
2.12896	0.2126	2.12896	0.2029	2.12896	0.1916
2.12668	0.21273	2.12668	0.20303	2.12668	0.19173
2.14528	0.21282	2.14528	0.20312	2.14528	0.19182
2.1356	0.21295	2.1356	0.20325	2.1356	0.19195
2.13397	0.21308	2.13397	0.20338	2.13397	0.19208
2.1428	0.21312	2.1428	0.20342	2.1428	0.19212
2.15502	0.21321	2.15502	0.20351	2.15502	0.19221
2.14876	0.21334	2.14876	0.20364	2.14876	0.19234
2.15034	0.21339	2.15034	0.20369	2.15034	0.19239
2.15684	0.21352	2.15684	0.20382	2.15684	0.19252
2.15018	0.21356	2.15018	0.20386	2.15018	0.19256
2.16262	0.21374	2.16262	0.20404	2.16262	0.19274
2.14452	0.21378	2.14452	0.20408	2.14452	0.19278
2.16444	0.21391	2.16444	0.20421	2.16444	0.19291
2.15058	0.21396	2.15058	0.20426	2.15058	0.19296
2.1714	0.21409	2.1714	0.20439	2.1714	0.19309
2.15337	0.21413	2.15337	0.20443	2.15337	0.19313
2.15919	0.21431	2.15919	0.20461	2.15919	0.19331
2.1613	0.21435	2.1613	0.20465	2.1613	0.19335
2.15544	0.21448	2.15544	0.20478	2.15544	0.19348
2.16281	0.21453	2.16281	0.20483	2.16281	0.19353
2.15916	0.21466	2.15916	0.20496	2.15916	0.19366
2.17385	0.21475	2.17385	0.20505	2.17385	0.19375
2.15983	0.21488	2.15983	0.20518	2.15983	0.19388
2.1819	0.21492	2.1819	0.20522	2.1819	0.19392
2.1697	0.21505	2.1697	0.20535	2.1697	0.19405
2.18157	0.21514	2.18157	0.20544	2.18157	0.19414
2.17035	0.21523	2.17035	0.20553	2.17035	0.19423
2.17804	0.21532	2.17804	0.20562	2.17804	0.19432
2.18816	0.21545	2.18816	0.20575	2.18816	0.19445
2.17024	0.21553	2.17024	0.20583	2.17024	0.19453
2.1903	0.21562	2.1903	0.20592	2.1903	0.19462
2.17359	0.21571	2.17359	0.20601	2.17359	0.19471
2.19322	0.2158	2.19322	0.2061	2.19322	0.1948
2.17923	0.21593	2.17923	0.20623	2.17923	0.19493
2.1949	0.21597	2.1949	0.20627	2.1949	0.19497
2.18899	0.2161	2.18899	0.2064	2.18899	0.1951
2.19897	0.21615	2.19897	0.20645	2.19897	0.19515
2.19554	0.21632	2.19554	0.20662	2.19554	0.19532
2.19732	0.21637	2.19732	0.20667	2.19732	0.19537
2.20887	0.2165	2.20887	0.2068	2.20887	0.1955
2.19405	0.21659	2.19405	0.20689	2.19405	0.19559
2.2064	0.21672	2.2064	0.20702	2.2064	0.19572
2.19126	0.21676	2.19126	0.20706	2.19126	0.19576
2.20497	0.21689	2.20497	0.20719	2.20497	0.19589
2.19291	0.21698	2.19291	0.20728	2.19291	0.19598
2.20735	0.21707	2.20735	0.20737	2.20735	0.19607
2.20225	0.21716	2.20225	0.20746	2.20225	0.19616
2.21765	0.21725	2.21765	0.20755	2.21765	0.19625
2.20869	0.21733	2.20869	0.20763	2.20869	0.19633
2.22115	0.21742	2.22115	0.20772	2.22115	0.19642
2.22505	0.21755	2.22505	0.20785	2.22505	0.19655
2.21736	0.2176	2.21736	0.2079	2.21736	0.1966
2.2251	0.21773	2.2251	0.20803	2.2251	0.19673
2.21094	0.21782	2.21094	0.20812	2.21094	0.19682
2.22926	0.21795	2.22926	0.20825	2.22926	0.19695
2.21569	0.21799	2.21569	0.20829	2.21569	0.19699
2.2246	0.21812	2.2246	0.20842	2.2246	0.19712
2.2156	0.21821	2.2156	0.20851	2.2156	0.19721
2.22151	0.21834	2.22151	0.20864	2.22151	0.19734
2.22986	0.21839	2.22986	0.20869	2.22986	0.19739
2.22757	0.21852	2.22757	0.20882	2.22757	0.19752
2.23448	0.21856	2.23448	0.20886	2.23448	0.19756
2.22786	0.21874	2.22786	0.20904	2.22786	0.19774
2.24302	0.21878	2.24302	0.20908	2.24302	0.19778
2.23282	0.21891	2.23282	0.20921	2.23282	0.19791
2.25156	0.21896	2.25156	0.20926	2.25156	0.19796
2.24012	0.21909	2.24012	0.20939	2.24012	0.19809
2.25064	0.21918	2.25064	0.20948	2.25064	0.19818
2.23586	0.21922	2.23586	0.20952	2.23586	0.19822
2.24782	0.21935	2.24782	0.20965	2.24782	0.19835
2.23662	0.21944	2.23662	0.20974	2.23662	0.19844
2.23921	0.21957	2.23921	0.20987	2.23921	0.19857
2.24719	0.21961	2.24719	0.20991	2.24719	0.19861
2.24355	0.21975	2.24355	0.21005	2.24355	0.19875
2.25733	0.21983	2.25733	0.21013	2.25733	0.19883
2.24529	0.21992	2.24529	0.21022	2.24529	0.19892
2.2627	0.22001	2.2627	0.21031	2.2627	0.19901
2.25729	0.22014	2.25729	0.21044	2.25729	0.19914
2.26848	0.22023	2.26848	0.21053	2.26848	0.19923
2.2643	0.22032	2.2643	0.21112	2.2643	0.19932
2.26884	0.2204	2.26884	0.2112	2.26884	0.1994
2.25857	0.22049	2.25857	0.21129	2.25857	0.19949
2.27012	0.22058	2.27012	0.21138	2.27012	0.19958
2.26112	0.22067	2.26112	0.21147	2.26112	0.19967
2.26545	0.2208	2.26545	0.2116	2.26545	0.1998
2.27057	0.22084	2.27057	0.21164	2.27057	0.19984
2.26546	0.22097	2.26546	0.21177	2.26546	0.19997
2.28669	0.22106	2.28669	0.21186	2.28669	0.20006
2.27297	0.22115	2.27297	0.21195	2.27297	0.20015
2.28885	0.22124	2.28885	0.21204	2.28885	0.20024
2.2828	0.22137	2.2828	0.21217	2.2828	0.20037
2.29254	0.22141	2.29254	0.21221	2.29254	0.20041
2.28577	0.22154	2.28577	0.21234	2.28577	0.20054
2.2964	0.22163	2.2964	0.21243	2.2964	0.20063
2.28836	0.22172	2.28836	0.21252	2.28836	0.20072
2.2975	0.22181	2.2975	0.21261	2.2975	0.20081
2.3034	0.22194	2.3034	0.21274	2.3034	0.20094
2.29881	0.22198	2.29881	0.21278	2.29881	0.20098
2.31246	0.22211	2.31246	0.21291	2.31246	0.20111
2.30414	0.22216	2.30414	0.21296	2.30414	0.20116
2.31528	0.22229	2.31528	0.21309	2.31528	0.20129
2.30827	0.22233	2.30827	0.21313	2.30827	0.20133
2.30577	0.22242	2.30577	0.21322	2.30577	0.20142
2.30282	0.22255	2.30282	0.21335	2.30282	0.20155
2.30884	0.2226	2.30884	0.2134	2.30884	0.2016
2.30552	0.22273	2.30552	0.21353	2.30552	0.20173
2.31273	0.22282	2.31273	0.21362	2.31273	0.20182
2.30729	0.2229	2.30729	0.2137	2.30729	0.2019
2.3173	0.22295	2.3173	0.21375	2.3173	0.20195
2.31312	0.22308	2.31312	0.21388	2.31312	0.20208
2.32229	0.22312	2.32229	0.21392	2.32229	0.20212
2.31591	0.22325	2.31591	0.21405	2.31591	0.20225
2.33387	0.22334	2.33387	0.21414	2.33387	0.20234
2.3205	0.22343	2.3205	0.21423	2.3205	0.20243
2.33776	0.22352	2.33776	0.21432	2.33776	0.20252
2.32249	0.22365	2.32249	0.21445	2.32249	0.20265
2.33903	0.22369	2.33903	0.21449	2.33903	0.20269
2.32304	0.22382	2.32304	0.21462	2.32304	0.20282
2.34179	0.22387	2.34179	0.21467	2.34179	0.20287
2.32933	0.224	2.32933	0.2148	2.32933	0.203
2.35046	0.22404	2.35046	0.21484	2.35046	0.20304
2.33797	0.22418	2.33797	0.21498	2.33797	0.20317
2.34834	0.22422	2.34834	0.21502	2.34834	0.20322
2.33517	0.22435	2.33517	0.21515	2.33517	0.20335
2.34638	0.22444	2.34638	0.21524	2.34638	0.20344
2.33823	0.22453	2.33823	0.21533	2.33823	0.20353
2.34895	0.22461	2.34895	0.21541	2.34895	0.20361
2.33399	0.22466	2.33399	0.21546	2.33399	0.20366
2.35082	0.22479	2.35082	0.21559	2.35082	0.20379
2.33378	0.22483	2.33378	0.21563	2.33378	0.20383
2.34636	0.22501	2.34636	0.21581	2.34636	0.20401
2.34723	0.22505	2.34723	0.21585	2.34723	0.20405
2.34411	0.22518	2.34411	0.21598	2.34411	0.20418
2.3483	0.22523	2.3483	0.21603	2.3483	0.20423
2.34652	0.22536	2.34652	0.21616	2.34652	0.20436
2.36544	0.22545	2.36544	0.21625	2.36544	0.20445
2.353	0.22554	2.353	0.21634	2.353	0.20454
2.36909	0.22562	2.36909	0.21642	2.36909	0.20462
2.35284	0.22571	2.35284	0.21651	2.35284	0.20471
2.36917	0.2258	2.36917	0.2166	2.36917	0.2048
2.36377	0.22593	2.36377	0.21673	2.36377	0.20493
2.37719	0.22597	2.37719	0.21677	2.37719	0.20497
2.36486	0.2261	2.36486	0.2169	2.36486	0.2051
2.37592	0.22615	2.37592	0.21695	2.37592	0.20515
2.36439	0.22624	2.36439	0.21704	2.36439	0.20524
[truncated: 10,594 more rows]

## Sheet: 10-15mm，Stress-Strain 
Stress	SP5-10(3)	Stress	SP5-10(5)	Stress	SP5-10(7)
0	0	0	0	0	0
0.10064	0.02833	0.10131	0.02848	0.10032	0.02261
0.10018	0.02833	0.10076	0.02848	0.10082	0.02261
0.10046	0.02833	0.10094	0.02848	0.10132	0.02261
0.10113	0.02838	0.10135	0.02848	0.10104	0.02261
0.10136	0.02838	0.10256	0.02853	0.09941	0.02265
0.10045	0.02838	0.10242	0.02853	0.09959	0.02265
0.10192	0.02838	0.10106	0.02853	0.10064	0.02265
0.10431	0.02842	0.10064	0.02853	0.10018	0.02265
0.10203	0.02842	0.10018	0.02853	0.10046	0.02265
0.10274	0.02842	0.09917	0.02857	0.10113	0.0227
0.1026	0.02842	0.09985	0.02857	0.10136	0.0227
0.10132	0.02842	0.10053	0.02857	0.10045	0.0227
0.10283	0.02847	0.10031	0.02857	0.10192	0.0227
0.10205	0.02847	0.09986	0.02857	0.10431	0.02274
0.10215	0.02847	0.10127	0.02861	0.10203	0.02274
0.10318	0.02847	0.10085	0.02861	0.10274	0.02274
0.10265	0.02847	0.10122	0.02861	0.1026	0.02274
0.09373	0.02851	0.10182	0.02861	0.10132	0.02274
0.10201	0.02851	0.1026	0.02861	0.10283	0.02278
0.10201	0.02851	0.10283	0.02866	0.10205	0.02278
0.10364	0.02851	0.10275	0.02866	0.10215	0.02278
0.10344	0.02851	0.10388	0.02866	0.10318	0.02278
0.10321	0.02856	0.10396	0.02866	0.10265	0.02278
0.10371	0.02856	0.10383	0.0287	0.09373	0.02283
0.10383	0.02856	0.10265	0.0287	0.10201	0.02283
0.10439	0.02856	0.1041	0.0287	0.10201	0.02283
0.11469	0.0286	0.10346	0.0287	0.10364	0.02283
0.10406	0.0286	0.10261	0.0287	0.10344	0.02283
0.10411	0.0286	0.09432	0.02875	0.10321	0.02287
0.1048	0.0286	0.10374	0.02875	0.10371	0.02287
0.10362	0.0286	0.10302	0.02875	0.10383	0.02287
0.10408	0.02865	0.10306	0.02875	0.10439	0.02287
0.10434	0.02865	0.1022	0.02875	0.11469	0.02292
0.10433	0.02865	0.10385	0.02879	0.10406	0.02292
0.10494	0.02865	0.10351	0.02879	0.10411	0.02292
0.10604	0.02865	0.10371	0.02879	0.1048	0.02292
0.09605	0.02869	0.10387	0.02879	0.10362	0.02292
0.10375	0.02869	0.10433	0.02879	0.10408	0.02296
0.10413	0.02869	0.10761	0.02884	0.10434	0.02296
0.10329	0.02869	0.10407	0.02884	0.10433	0.02296
0.1052	0.02869	0.1047	0.02884	0.10494	0.02296
0.10517	0.02874	0.10399	0.02884	0.10604	0.02296
0.10434	0.02874	0.10429	0.02888	0.09605	0.02301
0.10456	0.02874	0.10457	0.02888	0.10375	0.02301
0.10443	0.02874	0.10457	0.02888	0.10413	0.02301
0.10442	0.02874	0.10274	0.02888	0.10329	0.02301
0.10572	0.02878	0.10428	0.02888	0.1052	0.02301
0.10631	0.02878	0.09756	0.02892	0.10517	0.02305
0.10511	0.02878	0.10497	0.02892	0.10434	0.02305
0.10646	0.02878	0.1053	0.02892	0.10456	0.02305
0.10603	0.02883	0.10494	0.02892	0.10443	0.02305
0.10494	0.02883	0.10451	0.02892	0.10442	0.02305
0.10581	0.02883	0.10511	0.02897	0.10572	0.0231
0.10563	0.02883	0.1046	0.02897	0.10631	0.0231
0.10544	0.02883	0.10598	0.02897	0.10511	0.0231
0.09941	0.02887	0.1052	0.02897	0.10646	0.0231
0.10452	0.02887	0.1053	0.02897	0.10603	0.02314
0.10634	0.02887	0.11555	0.02901	0.10494	0.02314
0.10536	0.02887	0.10583	0.02901	0.10581	0.02314
0.10623	0.02887	0.1057	0.02901	0.10563	0.02314
0.10594	0.02892	0.1048	0.02901	0.10544	0.02314
0.10655	0.02892	0.10521	0.02906	0.09941	0.02319
0.10548	0.02892	0.10415	0.02906	0.10452	0.02319
0.10536	0.02892	0.10577	0.02906	0.10634	0.02319
0.10699	0.02892	0.10576	0.02906	0.10536	0.02319
0.11762	0.02896	0.10626	0.02906	0.10623	0.02319
0.10801	0.02896	0.09624	0.0291	0.10594	0.02323
0.10828	0.02896	0.10182	0.0291	0.10655	0.02323
0.10815	0.02896	0.10378	0.0291	0.10548	0.02323
0.1074	0.02896	0.10584	0.0291	0.10536	0.02323
0.10787	0.02901	0.10419	0.0291	0.10699	0.02323
0.10824	0.02901	0.1054	0.0291	0.11762	0.02328
0.10796	0.02901	0.10411	0.02914	0.10801	0.02328
0.10767	0.02901	0.10376	0.02914	0.10828	0.02328
0.10818	0.02901	0.10606	0.02914	0.10815	0.02328
0.10823	0.02905	0.10512	0.02914	0.1074	0.02328
0.10772	0.02905	0.11476	0.02919	0.10787	0.02332
0.10759	0.02905	0.10553	0.02919	0.10824	0.02332
0.10814	0.02905	0.10667	0.02919	0.10796	0.02332
0.10936	0.0291	0.10621	0.02919	0.10767	0.02332
0.10814	0.0291	0.10648	0.02919	0.10818	0.02332
0.10915	0.0291	0.10612	0.02923	0.10823	0.02337
0.10804	0.0291	0.1059	0.02923	0.10772	0.02337
0.10911	0.0291	0.10576	0.02923	0.10759	0.02337
0.11935	0.02914	0.1048	0.02923	0.10814	0.02337
0.10924	0.02914	0.10698	0.02923	0.10936	0.02341
0.10968	0.02914	0.10439	0.02928	0.10814	0.02341
0.10992	0.02914	0.10479	0.02928	0.10915	0.02341
0.10809	0.02914	0.10451	0.02928	0.10804	0.02341
0.10855	0.02919	0.10469	0.02928	0.10911	0.02341
0.10828	0.02919	0.10551	0.02928	0.11935	0.02346
0.10805	0.02919	0.10485	0.02932	0.10924	0.02346
0.10966	0.02919	0.10437	0.02932	0.10968	0.02346
0.11001	0.02919	0.10507	0.02932	0.10992	0.02346
0.10898	0.02923	0.10462	0.02932	0.10809	0.02346
0.1081	0.02923	0.11183	0.02936	0.10855	0.0235
0.10934	0.02923	0.10712	0.02936	0.10828	0.0235
0.10915	0.02923	0.10693	0.02936	0.10805	0.0235
0.1095	0.02923	0.10667	0.02936	0.10966	0.0235
0.10973	0.02928	0.10598	0.02936	0.11001	0.0235
0.10997	0.02928	0.10657	0.02941	0.10898	0.02355
0.10847	0.02928	0.10593	0.02941	0.1081	0.02355
0.10932	0.02928	0.10584	0.02941	0.10934	0.02355
0.11838	0.02932	0.1062	0.02941	0.10915	0.02355
0.10992	0.02932	0.10635	0.02941	0.1095	0.02355
0.10892	0.02932	0.09716	0.02945	0.10973	0.02359
0.10879	0.02932	0.10525	0.02945	0.10997	0.02359
0.10943	0.02932	0.10588	0.02945	0.10847	0.02359
0.10983	0.02937	0.10548	0.02945	0.10932	0.02359
0.1098	0.02937	0.10526	0.02945	0.11838	0.02364
0.10906	0.02937	0.10611	0.0295	0.10992	0.02364
0.10865	0.02937	0.10567	0.0295	0.10892	0.02364
0.10846	0.02937	0.10443	0.0295	0.10879	0.02364
0.10603	0.02941	0.10593	0.0295	0.10943	0.02364
0.10553	0.02941	0.10635	0.0295	0.10983	0.02368
0.10563	0.02941	0.11608	0.02954	0.1098	0.02368
0.1059	0.02941	0.10745	0.02954	0.10906	0.02368
0.10692	0.02941	0.10693	0.02954	0.10865	0.02368
0.10567	0.02946	0.10816	0.02954	0.10846	0.02368
0.10726	0.02946	0.10676	0.02958	0.10603	0.02373
0.10576	0.02946	0.10876	0.02958	0.10553	0.02373
0.10657	0.02946	0.108	0.02958	0.10563	0.02373
0.11121	0.0295	0.10763	0.02958	0.1059	0.02373
0.10731	0.0295	0.10873	0.02958	0.10692	0.02373
0.10668	0.0295	0.10685	0.02958	0.10567	0.02377
0.10721	0.0295	0.10685	0.02963	0.10726	0.02377
0.10694	0.0295	0.10847	0.02963	0.10576	0.02377
0.10745	0.02955	0.10649	0.02963	0.10657	0.02377
0.10744	0.02955	0.10677	0.02963	0.11121	0.02382
0.10687	0.02955	0.10789	0.02963	0.10731	0.02382
0.10712	0.02955	0.1069	0.02967	0.10668	0.02382
0.10715	0.02955	0.10851	0.02967	0.10721	0.02382
0.10594	0.02955	0.108	0.02967	0.10694	0.02382
0.10597	0.02959	0.10795	0.02967	0.10745	0.02386
0.10591	0.02959	0.10814	0.02967	0.10744	0.02386
0.10712	0.02959	0.1083	0.02972	0.10687	0.02386
0.10544	0.02959	0.10842	0.02972	0.10712	0.02386
0.10457	0.02959	0.10662	0.02972	0.10715	0.02386
0.1054	0.02964	0.10896	0.02972	0.10594	0.02386
0.10611	0.02964	0.10842	0.02976	0.10597	0.02391
0.10645	0.02964	0.10621	0.02976	0.10591	0.02391
0.10722	0.02964	0.10736	0.02976	0.10712	0.02391
0.11734	0.02968	0.10741	0.02976	0.10544	0.02391
0.10741	0.02968	0.10681	0.02976	0.10457	0.02391
0.10768	0.02968	0.09656	0.0298	0.1054	0.02395
0.10806	0.02968	0.10625	0.0298	0.10611	0.02395
0.10787	0.02968	0.10644	0.0298	0.10645	0.02395
0.10713	0.02973	0.10616	0.0298	0.10722	0.02395
0.10893	0.02973	0.10549	0.0298	0.11734	0.024
0.10819	0.02973	0.10508	0.02985	0.10741	0.024
0.1066	0.02973	0.10498	0.02985	0.10768	0.024
0.10182	0.02977	0.10537	0.02985	0.10806	0.024
0.09757	0.02977	0.1053	0.02985	0.10787	0.024
0.10634	0.02977	0.10563	0.02985	0.10713	0.02404
0.10632	0.02977	0.11511	0.02989	0.10893	0.02404
0.10752	0.02977	0.10373	0.02989	0.10819	0.02404
0.108	0.02977	0.10484	0.02989	0.1066	0.02404
0.10845	0.02982	0.10507	0.02989	0.10182	0.02408
0.1086	0.02982	0.10531	0.02989	0.09757	0.02408
0.10818	0.02982	0.10607	0.02994	0.10634	0.02408
0.10682	0.02982	0.10503	0.02994	0.10632	0.02408
0.10769	0.02982	0.10579	0.02994	0.10752	0.02408
0.10918	0.02986	0.10489	0.02994	0.108	0.02408
0.11022	0.02986	0.09354	0.02998	0.10845	0.02413
0.10987	0.02986	0.10382	0.02998	0.1086	0.02413
0.10915	0.02986	0.1047	0.02998	0.10818	0.02413
0.1093	0.02991	0.10479	0.02998	0.10682	0.02413
0.10901	0.02991	0.10388	0.02998	0.10769	0.02413
0.10966	0.02991	0.10443	0.03002	0.10918	0.02417
0.10962	0.02991	0.10521	0.03002	0.11022	0.02417
0.10842	0.02991	0.10479	0.03002	0.10987	0.02417
0.1014	0.02995	0.1054	0.03002	0.10915	0.02417
0.10841	0.02995	0.10512	0.03002	0.1093	0.02422
0.10838	0.02995	0.10576	0.03007	0.10901	0.02422
0.10874	0.02995	0.10652	0.03007	0.10966	0.02422
0.10828	0.02995	0.10576	0.03007	0.10962	0.02422
0.10906	0.03	0.10593	0.03007	0.10842	0.02422
0.10832	0.03	0.10471	0.03007	0.1014	0.02426
0.10932	0.03	0.10494	0.03011	0.10841	0.02426
0.1101	0.03	0.1047	0.03011	0.10838	0.02426
0.10982	0.03	0.10528	0.03011	0.10874	0.02426
0.11083	0.03004	0.10489	0.03011	0.10828	0.02426
0.10982	0.03004	0.10402	0.03011	0.10906	0.02431
0.11106	0.03004	0.10443	0.03016	0.10832	0.02431
0.10989	0.03004	0.10434	0.03016	0.10932	0.02431
0.10927	0.03004	0.10425	0.03016	0.1101	0.02431
0.11025	0.03009	0.10499	0.03016	0.10982	0.02431
0.11048	0.03009	0.10508	0.03016	0.11083	0.02435
0.10975	0.03009	0.10415	0.0302	0.10982	0.02435
0.11121	0.03009	0.10401	0.0302	0.11106	0.02435
0.10256	0.03013	0.10537	0.0302	0.10989	0.02435
0.10938	0.03013	0.10499	0.0302	0.10927	0.02435
0.10916	0.03013	0.10489	0.0302	0.11025	0.0244
0.10892	0.03013	0.10772	0.03025	0.11048	0.0244
0.11008	0.03013	0.106	0.03025	0.10975	0.0244
0.10978	0.03018	0.10721	0.03025	0.11121	0.0244
0.10997	0.03018	0.10708	0.03025	0.10256	0.02444
0.11022	0.03018	0.10686	0.03029	0.10938	0.02444
0.10962	0.03018	0.10671	0.03029	0.10916	0.02444
0.11085	0.03018	0.10676	0.03029	0.10892	0.02444
0.11986	0.03022	0.10736	0.03029	0.11008	0.02444
0.11195	0.03022	0.10616	0.03029	0.10978	0.02449
0.11103	0.03022	0.09735	0.03033	0.10997	0.02449
0.11043	0.03022	0.10438	0.03033	0.11022	0.02449
0.11144	0.03027	0.10461	0.03033	0.10962	0.02449
0.11071	0.03027	0.10567	0.03033	0.11085	0.02449
0.11017	0.03027	0.10646	0.03033	0.11986	0.02453
0.11102	0.03027	0.10545	0.03038	0.11195	0.02453
0.1107	0.03027	0.1062	0.03038	0.11103	0.02453
0.10448	0.03031	0.10658	0.03038	0.11043	0.02453
0.11089	0.03031	0.10694	0.03038	0.11144	0.02458
0.11172	0.03031	0.10558	0.03038	0.11071	0.02458
0.10939	0.03031	0.10845	0.03042	0.11017	0.02458
0.11066	0.03031	0.10753	0.03042	0.11102	0.02458
0.11112	0.03031	0.10676	0.03042	0.1107	0.02458
0.11024	0.03036	0.10931	0.03042	0.10448	0.02462
0.11117	0.03036	0.10835	0.03047	0.11089	0.02462
0.10918	0.03036	0.108	0.03047	0.11172	0.02462
0.11043	0.03036	0.10909	0.03047	0.10939	0.02462
0.11469	0.0304	0.10812	0.03047	0.11066	0.02462
0.11234	0.0304	0.10876	0.03047	0.11112	0.02462
0.11171	0.0304	0.10136	0.03051	0.11024	0.02467
0.11177	0.0304	0.10823	0.03051	0.11117	0.02467
0.11203	0.0304	0.1075	0.03051	0.10918	0.02467
0.11167	0.03045	0.10731	0.03051	0.11043	0.02467
0.1127	0.03045	0.10735	0.03051	0.11469	0.02471
0.11215	0.03045	0.10761	0.03055	0.11234	0.02471
0.11185	0.03045	0.10809	0.03055	0.11171	0.02471
0.10586	0.03049	0.10816	0.03055	0.11177	0.02471
0.11075	0.03049	0.10769	0.03055	0.11203	0.02471
0.11345	0.03049	0.10909	0.03055	0.11167	0.02476
0.11303	0.03049	0.11047	0.0306	0.1127	0.02476
0.11299	0.03049	0.11064	0.0306	0.11215	0.02476
0.11231	0.03049	0.10993	0.0306	0.11185	0.02476
0.11239	0.03054	0.11029	0.0306	0.10586	0.0248
0.11248	0.03054	0.11006	0.0306	0.11075	0.0248
0.11176	0.03054	0.11087	0.03064	0.11345	0.0248
0.11215	0.03054	0.1104	0.03064	0.11303	0.0248
0.11112	0.03054	0.10973	0.03064	0.11299	0.0248
0.11322	0.03058	0.10969	0.03064	0.11231	0.0248
0.11394	0.03058	0.11002	0.03064	0.11239	0.02485
0.11299	0.03058	0.10816	0.03069	0.11248	0.02485
0.11378	0.03058	0.1081	0.03069	0.11176	0.02485
0.11303	0.03063	0.10879	0.03069	0.11215	0.02485
0.11349	0.03063	0.10908	0.03069	0.11112	0.02485
0.11369	0.03063	0.10891	0.03069	0.11322	0.02489
0.11362	0.03063	0.10847	0.03073	0.11394	0.02489
0.11336	0.03063	0.10923	0.03073	0.11299	0.02489
0.11227	0.03067	0.1096	0.03073	0.11378	0.02489
0.11239	0.03067	0.10807	0.03073	0.11303	0.02494
0.11259	0.03067	0.11138	0.03077	0.11349	0.02494
0.11276	0.03067	0.11106	0.03077	0.11369	0.02494
0.11313	0.03067	0.10996	0.03077	0.11362	0.02494
0.1127	0.03072	0.11119	0.03077	0.11336	0.02494
0.11307	0.03072	0.11091	0.03077	0.11227	0.02498
0.11413	0.03072	0.10996	0.03082	0.11239	0.02498
0.11368	0.03072	0.10988	0.03082	0.11259	0.02498
0.11299	0.03072	0.11048	0.03082	0.11276	0.02498
0.1227	0.03076	0.1108	0.03082	0.11313	0.02498
0.1127	0.03076	0.11005	0.03082	0.1127	0.02503
0.11346	0.03076	0.10969	0.03086	0.11307	0.02503
0.11404	0.03076	0.1096	0.03086	0.11413	0.02503
0.11474	0.03076	0.1095	0.03086	0.11368	0.02503
0.11465	0.0308	0.10951	0.03086	0.11299	0.02503
0.11414	0.0308	0.11106	0.03086	0.1227	0.02507
0.11385	0.0308	0.11008	0.03091	0.1127	0.02507
0.11359	0.0308	0.10992	0.03091	0.11346	0.02507
0.11108	0.03085	0.10928	0.03091	0.11404	0.02507
0.11446	0.03085	0.10964	0.03091	0.11474	0.02507
0.11417	0.03085	0.11068	0.03091	0.11465	0.02512
0.11529	0.03085	0.11043	0.03095	0.11414	0.02512
0.11478	0.03085	0.11143	0.03095	0.11385	0.02512
0.11518	0.03089	0.1104	0.03095	0.11359	0.02512
0.11518	0.03089	0.11151	0.03095	0.11108	0.02516
0.11568	0.03089	0.11096	0.03099	0.11446	0.02516
0.11596	0.03089	0.10973	0.03099	0.11417	0.02516
0.12158	0.03094	0.10983	0.03099	0.11529	0.02516
0.1173	0.03094	0.10936	0.03099	0.11478	0.02516
0.1161	0.03094	0.11016	0.03099	0.11518	0.02521
0.11591	0.03094	0.10327	0.03104	0.11518	0.02521
0.11589	0.03094	0.10955	0.03104	0.11568	0.02521
0.11611	0.03098	0.10893	0.03104	0.11596	0.02521
0.11633	0.03098	0.10964	0.03104	0.12158	0.02525
0.11624	0.03098	0.11019	0.03104	0.1173	0.02525
0.1172	0.03098	0.10968	0.03108	0.1161	0.02525
0.11707	0.03098	0.11002	0.03108	0.11591	0.02525
0.10568	0.03103	0.10983	0.03108	0.11589	0.02525
0.11559	0.03103	0.11064	0.03108	0.11611	0.0253
0.1167	0.03103	0.10992	0.03108	0.11633	0.0253
0.1167	0.03103	0.11216	0.03113	0.11624	0.0253
0.11536	0.03103	0.11106	0.03113	0.1172	0.0253
0.11687	0.03107	0.11124	0.03113	0.11707	0.0253
0.11707	0.03107	0.11101	0.03113	0.10568	0.02534
0.11873	0.03107	0.1111	0.03113	0.11559	0.02534
0.11753	0.03107	0.11048	0.03117	0.1167	0.02534
0.11693	0.03107	0.11157	0.03117	0.1167	0.02534
0.12966	0.03112	0.11141	0.03117	0.11536	0.02534
0.11757	0.03112	0.11123	0.03117	0.11687	0.02539
0.1166	0.03112	0.10309	0.03121	0.11707	0.02539
0.11671	0.03112	0.11033	0.03121	0.11873	0.02539
0.11568	0.03112	0.11054	0.03121	0.11753	0.02539
0.11738	0.03116	0.1117	0.03121	0.11693	0.02539
0.11586	0.03116	0.11087	0.03121	0.12966	0.02543
0.1162	0.03116	0.11061	0.03126	0.11757	0.02543
0.11688	0.03116	0.1122	0.03126	0.1166	0.02543
0.11697	0.03116	0.11087	0.03126	0.11671	0.02543
0.10819	0.03121	0.11132	0.03126	0.11568	0.02543
0.1139	0.03121	0.11264	0.03126	0.11738	0.02547
0.11511	0.03121	0.11325	0.0313	0.11586	0.02547
0.1162	0.03121	0.11148	0.0313	0.1162	0.02547
0.11564	0.03121	0.11339	0.0313	0.11688	0.02547
0.11729	0.03121	0.11138	0.0313	0.11697	0.02547
0.11642	0.03125	0.1123	0.0313	0.10819	0.02552
0.11538	0.03125	0.11217	0.03135	0.1139	0.02552
0.11769	0.03125	0.11261	0.03135	0.11511	0.02552
0.11752	0.03125	0.11281	0.03135	0.1162	0.02552
0.11783	0.03125	0.11235	0.03135	0.11564	0.02552
0.1167	0.03125	0.102	0.03139	0.11729	0.02552
0.12082	0.0313	0.11106	0.03139	0.11642	0.02556
0.11767	0.0313	0.11134	0.03139	0.11538	0.02556
0.11797	0.0313	0.11211	0.03139	0.11769	0.02556
0.11718	0.0313	0.11179	0.03139	0.11752	0.02556
0.11679	0.0313	0.11285	0.03143	0.11783	0.02556
0.11706	0.03134	0.11325	0.03143	0.1167	0.02556
0.1178	0.03134	0.11198	0.03143	0.12082	0.02561
0.11749	0.03134	0.11138	0.03143	0.11767	0.02561
0.11804	0.03134	0.11229	0.03143	0.11797	0.02561
0.11834	0.03134	0.11588	0.03148	0.11718	0.02561
0.11936	0.03134	0.11361	0.03148	0.11679	0.02561
0.10829	0.03139	0.1143	0.03148	0.11706	0.02565
0.11824	0.03139	0.11457	0.03148	0.1178	0.02565
0.11718	0.03139	0.11334	0.03148	0.11749	0.02565
0.11811	0.03139	0.11395	0.03152	0.11804	0.02565
0.11847	0.03139	0.11421	0.03152	0.11834	0.02565
0.11857	0.03143	0.11325	0.03152	0.11936	0.02565
0.11875	0.03143	0.11422	0.03152	0.10829	0.0257
0.11856	0.03143	0.11435	0.03152	0.11824	0.0257
0.11848	0.03143	0.11235	0.03157	0.11718	0.0257
0.11945	0.03143	0.11339	0.03157	0.11811	0.0257
0.11958	0.03148	0.1128	0.03157	0.11847	0.0257
0.12935	0.03148	0.11311	0.03157	0.11857	0.02574
0.12036	0.03148	0.11216	0.03157	0.11875	0.02574
0.12032	0.03148	0.11292	0.03161	0.11856	0.02574
0.12017	0.03148	0.11188	0.03161	0.11848	0.02574
0.12164	0.03148	0.11289	0.03161	0.11945	0.02574
0.1179	0.03152	0.11389	0.03161	0.11958	0.02579
0.11921	0.03152	0.11979	0.03165	0.12935	0.02579
0.11958	0.03152	0.11471	0.03165	0.12036	0.02579
0.11986	0.03152	0.11504	0.03165	0.12032	0.02579
0.12027	0.03152	0.11525	0.03165	0.12017	0.02579
0.11024	0.03157	0.11516	0.03165	0.12164	0.02579
0.11847	0.03157	0.1164	0.0317	0.1179	0.02583
0.1193	0.03157	0.11544	0.0317	0.11921	0.02583
0.12009	0.03157	0.1162	0.0317	0.11958	0.02583
0.12071	0.03157	0.11523	0.0317	0.11986	0.02583
0.12089	0.03157	0.11532	0.0317	0.12027	0.02583
0.12099	0.03161	0.11379	0.03174	0.11024	0.02588
0.12229	0.03161	0.11417	0.03174	0.11847	0.02588
0.12032	0.03161	0.11481	0.03174	0.1193	0.02588
0.12106	0.03161	0.11516	0.03174	0.12009	0.02588
0.12149	0.03161	0.11518	0.03174	0.12071	0.02588
0.12219	0.03166	0.11569	0.03179	0.12089	0.02588
0.12152	0.03166	0.11557	0.03179	0.12099	0.02592
0.12101	0.03166	0.11687	0.03179	0.12229	0.02592
0.12009	0.03166	0.11595	0.03179	0.12032	0.02592
0.12182	0.03166	0.12781	0.03183	0.12106	0.02592
0.12124	0.0317	0.11733	0.03183	0.12149	0.02592
0.12143	0.0317	0.11786	0.03183	0.12219	0.02597
0.12108	0.0317	0.1183	0.03183	0.12152	0.02597
0.12136	0.0317	0.11788	0.03183	0.12101	0.02597
0.12064	0.0317	0.11791	0.03188	0.12009	0.02597
0.11569	0.03175	0.11788	0.03188	0.12182	0.02597
0.1215	0.03175	0.11659	0.03188	0.12124	0.02601
0.12055	0.03175	0.11797	0.03188	0.12143	0.02601
0.12126	0.03175	0.11853	0.03188	0.12108	0.02601
0.12233	0.03175	0.10837	0.03192	0.12136	0.02601
0.12191	0.03179	0.11701	0.03192	0.12064	0.02601
0.12122	0.03179	0.11714	0.03192	0.11569	0.02606
0.12169	0.03179	0.11775	0.03192	0.1215	0.02606
0.12113	0.03179	0.11892	0.03192	0.12055	0.02606
0.11976	0.03179	0.11902	0.03192	0.12126	0.02606
0.1279	0.03184	0.11839	0.03196	0.12233	0.02606
0.12155	0.03184	0.11738	0.03196	0.12191	0.0261
0.12219	0.03184	0.11953	0.03196	0.12122	0.0261
0.12009	0.03184	0.11879	0.03196	0.12169	0.0261
0.12127	0.03184	0.11943	0.03196	0.12113	0.0261
0.12219	0.03188	0.12326	0.03201	0.11976	0.0261
0.12182	0.03188	0.12021	0.03201	0.1279	0.02615
0.12256	0.03188	0.11976	0.03201	0.12155	0.02615
0.12183	0.03188	0.12083	0.03201	0.12219	0.02615
0.12219	0.03188	0.12036	0.03201	0.12009	0.02615
0.12324	0.03188	0.1192	0.03205	0.12127	0.02615
0.12096	0.03193	0.11861	0.03205	0.12219	0.02619
0.12183	0.03193	0.12051	0.03205	0.12182	0.02619
0.12145	0.03193	0.1191	0.03205	0.12256	0.02619
0.12223	0.03193	0.11966	0.03205	0.12183	0.02619
0.122	0.03193	0.12058	0.03205	0.12219	0.02619
0.12325	0.03197	0.1111	0.0321	0.12324	0.02619
0.12223	0.03197	0.12066	0.0321	0.12096	0.02624
0.12316	0.03197	0.12084	0.0321	0.12183	0.02624
0.12315	0.03197	0.12061	0.0321	0.12145	0.02624
0.12284	0.03197	0.12154	0.0321	0.12223	0.02624
0.13206	0.03202	0.12131	0.03214	0.122	0.02624
0.12439	0.03202	0.12222	0.03214	0.12325	0.02628
0.12357	0.03202	0.12213	0.03214	0.12223	0.02628
0.12512	0.03202	0.12209	0.03214	0.12316	0.02628
0.12476	0.03202	0.12217	0.03214	0.12315	0.02628
0.12411	0.03206	0.13349	0.03218	0.12284	0.02628
0.12417	0.03206	0.12229	0.03218	0.13206	0.02633
0.12348	0.03206	0.12259	0.03218	0.12439	0.02633
0.12434	0.03206	0.12149	0.03218	0.12357	0.02633
0.12497	0.03206	0.1213	0.03218	0.12512	0.02633
0.12475	0.03206	0.12153	0.03218	0.12476	0.02633
0.12327	0.03211	0.12294	0.03223	0.12411	0.02637
0.12359	0.03211	0.1225	0.03223	0.12417	0.02637
0.12452	0.03211	0.12181	0.03223	0.12348	0.02637
0.12502	0.03211	0.12204	0.03223	0.12434	0.02637
0.12315	0.03211	0.12166	0.03223	0.12497	0.02637
0.12522	0.03215	0.12308	0.03223	0.12475	0.02637
0.12489	0.03215	0.12162	0.03227	0.12327	0.02642
0.12494	0.03215	0.12176	0.03227	0.12359	0.02642
0.12507	0.03215	0.12139	0.03227	0.12452	0.02642
0.12488	0.03215	0.12107	0.03227	0.12502	0.02642
0.13518	0.0322	0.12189	0.03227	0.12315	0.02642
0.1269	0.0322	0.12221	0.03232	0.12522	0.02646
0.12662	0.0322	0.1224	0.03232	0.12489	0.02646
0.12682	0.0322	0.12246	0.03232	0.12494	0.02646
0.12552	0.0322	0.12149	0.03232	0.12507	0.02646
0.12662	0.03224	0.12089	0.03232	0.12488	0.02646
0.12675	0.03224	0.12145	0.03232	0.13518	0.02651
0.12634	0.03224	0.13001	0.03236	0.1269	0.02651
0.12777	0.03224	0.12382	0.03236	0.12662	0.02651
0.12713	0.03224	0.12442	0.03236	0.12682	0.02651
0.12068	0.03229	0.12284	0.03236	0.12552	0.02651
0.1258	0.03229	0.12319	0.03236	0.12662	0.02655
0.1265	0.03229	0.12349	0.0324	0.12675	0.02655
0.12613	0.03229	0.12428	0.0324	0.12634	0.02655
0.12704	0.03229	0.12315	0.0324	0.12777	0.02655
0.12704	0.03229	0.12474	0.0324	0.12713	0.02655
0.12753	0.03233	0.12409	0.0324	0.12068	0.0266
0.12687	0.03233	0.11695	0.03245	0.1258	0.0266
0.1278	0.03233	0.12271	0.03245	0.1265	0.0266
0.12782	0.03233	0.12198	0.03245	0.12613	0.0266
0.12916	0.03233	0.12294	0.03245	0.12704	0.0266
0.12899	0.03238	0.12278	0.03245	0.12704	0.0266
0.12806	0.03238	0.12377	0.03245	0.12753	0.02664
0.12938	0.03238	0.12336	0.03249	0.12687	0.02664
0.13027	0.03238	0.12349	0.03249	0.1278	0.02664
0.12887	0.03242	0.12408	0.03249	0.12782	0.02664
0.12975	0.03242	0.12391	0.03249	0.12916	0.02664
0.13042	0.03242	0.12445	0.03249	0.12899	0.02669
0.13064	0.03242	0.13383	0.03254	0.12806	0.02669
0.12287	0.03247	0.12629	0.03254	0.12938	0.02669
0.12901	0.03247	0.12447	0.03254	0.13027	0.02669
0.12961	0.03247	0.12492	0.03254	0.12887	0.02673
0.13	0.03247	0.12632	0.03254	0.12975	0.02673
0.12907	0.03247	0.12399	0.03258	0.13042	0.02673
0.12987	0.03251	0.12441	0.03258	0.13064	0.02673
0.12898	0.03251	0.12559	0.03258	0.12287	0.02678
0.13014	0.03251	0.12525	0.03258	0.12901	0.02678
0.13045	0.03251	0.12338	0.03258	0.12961	0.02678
0.1312	0.03256	0.12093	0.03262	0.13	0.02678
0.13153	0.03256	0.12405	0.03262	0.12907	0.02678
0.13209	0.03256	0.12497	0.03262	0.12987	0.02682
0.1311	0.03256	0.12552	0.03262	0.12898	0.02682
0.1318	0.0326	0.12441	0.03262	0.13014	0.02682
0.13247	0.0326	0.12499	0.03262	0.13045	0.02682
0.13166	0.0326	0.12629	0.03267	0.1312	0.02687
0.12206	0.03265	0.12428	0.03267	0.13153	0.02687
0.1321	0.03265	0.12589	0.03267	0.13209	0.02687
0.13218	0.03265	0.12529	0.03267	0.1311	0.02687
0.13366	0.03265	0.12428	0.03267	0.1318	0.02691
0.13411	0.03269	0.13594	0.03271	0.13247	0.02691
0.13448	0.03269	0.12669	0.03271	0.13166	0.02691
0.1351	0.03269	0.1267	0.03271	0.12206	0.02695
0.14243	0.03274	0.12769	0.03271	0.1321	0.02695
0.13326	0.03274	0.12737	0.03271	0.13218	0.02695
0.13399	0.03274	0.12656	0.03276	0.13366	0.02695
0.13557	0.03274	0.12638	0.03276	0.13411	0.027
0.13576	0.03278	0.12684	0.03276	0.13448	0.027
0.13527	0.03278	0.12646	0.03276	0.1351	0.027
0.13582	0.03278	0.12736	0.03276	0.14243	0.02704
0.13652	0.03283	0.11786	0.0328	0.13326	0.02704
0.13683	0.03283	0.1267	0.0328	0.13399	0.02704
0.13648	0.03283	0.12643	0.0328	0.13557	0.02704
0.13647	0.03287	0.12578	0.0328	0.13576	0.02709
0.13698	0.03287	0.12623	0.0328	0.13527	0.02709
0.13852	0.03287	0.12771	0.03284	0.13582	0.02709
0.13706	0.03292	0.12592	0.03284	0.13652	0.02713
0.13814	0.03292	0.12629	0.03284	0.13683	0.02713
0.13776	0.03296	0.12597	0.03284	0.13648	0.02713
0.13999	0.03296	0.12555	0.03284	0.13647	0.02718
0.13908	0.03296	0.13742	0.03289	0.13698	0.02718
0.13201	0.03301	0.12808	0.03289	0.13852	0.02718
0.1394	0.03301	0.12884	0.03289	0.13706	0.02722
0.13804	0.03301	0.12837	0.03289	0.13814	0.02722
0.14005	0.03305	0.12865	0.03293	0.13776	0.02727
0.13954	0.03305	0.12763	0.03293	0.13999	0.02727
0.14897	0.0331	0.12889	0.03293	0.13908	0.02727
0.14208	0.0331	0.12834	0.03293	0.13201	0.02731
0.14246	0.0331	0.12939	0.03293	0.1394	0.02731
0.14252	0.03314	0.12773	0.03298	0.13804	0.02731
0.14284	0.03314	0.12827	0.03298	0.14005	0.02736
0.14215	0.03319	0.12801	0.03298	0.13954	0.02736
0.14107	0.03323	0.12921	0.03298	0.14897	0.0274
0.14237	0.03323	0.13019	0.03302	0.14208	0.0274
0.15296	0.03328	0.13035	0.03302	0.14246	0.0274
0.14409	0.03328	0.13156	0.03302	0.14252	0.02745
0.14381	0.03332	0.14188	0.03306	0.14284	0.02745
0.14423	0.03332	0.1316	0.03306	0.14215	0.02749
0.13701	0.03337	0.13112	0.03306	0.14107	0.02754
0.14512	0.03337	0.13139	0.03306	0.14237	0.02754
0.14516	0.03341	0.13172	0.03311	0.15296	0.02758
0.14675	0.03341	0.13248	0.03311	0.14409	0.02758
0.14754	0.03346	0.13333	0.03311	0.14381	0.02763
0.14813	0.0335	0.13258	0.03311	0.14423	0.02763
0.14829	0.0335	0.13467	0.03315	0.13701	0.02767
0.14073	0.03355	0.13217	0.03315	0.14512	0.02767
0.14866	0.03355	0.13368	0.03315	0.14516	0.02772
0.14989	0.03359	0.13368	0.0332	0.14675	0.02772
0.15568	0.03364	0.133	0.0332	0.14754	0.02776
0.15187	0.03368	0.13405	0.0332	0.14813	0.02781
0.1526	0.03368	0.14256	0.03324	0.14829	0.02781
0.14265	0.03373	0.13434	0.03324	0.14073	0.02785
0.1522	0.03373	0.1342	0.03324	0.14866	0.02785
0.15325	0.03377	0.13521	0.03324	0.14989	0.0279
0.16538	0.03382	0.13661	0.03329	0.15568	0.02794
0.1555	0.03386	0.13561	0.03329	0.15187	0.02799
0.15525	0.03386	0.13624	0.03329	0.1526	0.02799
0.15582	0.03391	0.12465	0.03333	0.14265	0.02803
0.15669	0.03395	0.13556	0.03333	0.1522	0.02803
0.16668	0.034	0.13523	0.03333	0.15325	0.02808
0.15815	0.034	0.13529	0.03337	0.16538	0.02812
0.15827	0.03404	0.13681	0.03337	0.1555	0.02817
0.15019	0.03409	0.13541	0.03337	0.15525	0.02817
0.15983	0.03409	0.14745	0.03342	0.15582	0.02821
0.15883	0.03413	0.13852	0.03342	0.15669	0.02826
0.16633	0.03418	0.13862	0.03342	0.16668	0.0283
0.16118	0.03422	0.14078	0.03342	0.15815	0.0283
0.15325	0.03427	0.13989	0.03346	0.15827	0.02834
0.16019	0.03431	0.13905	0.03346	0.15019	0.02839
0.1608	0.03431	0.14002	0.03346	0.15983	0.02839
0.16264	0.0344	0.13827	0.0335	0.15883	0.02843
0.16217	0.0344	0.13914	0.0335	0.16633	0.02848
0.16257	0.03445	0.13883	0.0335	0.16118	0.02852
0.16297	0.03449	0.14082	0.03355	0.15325	0.02857
0.17206	0.03454	0.14026	0.03355	0.16019	0.02861
0.16391	0.03458	0.15078	0.03359	0.1608	0.02861
0.16652	0.03458	0.14272	0.03359	0.16264	0.0287
0.16601	0.03467	0.14272	0.03359	0.16217	0.0287
0.16715	0.03467	0.14258	0.03364	0.16257	0.02875
0.1698	0.03476	0.14339	0.03364	0.16297	0.02879
0.17	0.03476	0.1324	0.03368	0.17206	0.02884
0.16949	0.03485	0.14286	0.03368	0.16391	0.02888
0.16989	0.03485	0.14176	0.03373	0.16652	0.02888
0.17257	0.03494	0.14199	0.03373	0.16601	0.02897
0.17343	0.03494	0.14236	0.03373	0.16715	0.02897
0.17265	0.03503	0.14385	0.03377	0.1698	0.02906
0.1726	0.03503	0.1424	0.03381	0.17	0.02906
0.18318	0.03508	0.14384	0.03381	0.16949	0.02915
0.16834	0.03517	0.13421	0.03386	0.16989	0.02915
0.16794	0.03517	0.1431	0.03386	0.17257	0.02924
0.18746	0.03526	0.14374	0.0339	0.17343	0.02924
0.17822	0.03526	0.15325	0.03395	0.17265	0.02933
0.16175	0.03535	0.14594	0.03395	0.1726	0.02933
0.17243	0.03535	0.14608	0.03395	0.18318	0.02938
0.18809	0.03544	0.14584	0.03399	0.16834	0.02947
0.17894	0.03548	0.13841	0.03403	0.16794	0.02947
0.17786	0.03553	0.14675	0.03408	0.18746	0.02956
0.17797	0.03557	0.14621	0.03408	0.17822	0.02956
0.18818	0.03562	0.14819	0.03412	0.16175	0.02965
0.17227	0.03571	0.14847	0.03417	0.17243	0.02965
0.17273	0.03571	0.14745	0.03417	0.18809	0.02974
0.19182	0.0358	0.1368	0.03421	0.17894	0.02978
0.18034	0.03584	0.14646	0.03421	0.17786	0.02983
0.17176	0.03589	0.14828	0.03425	0.17797	0.02987
0.17985	0.03593	0.15087	0.0343	0.18818	0.02991
0.18215	0.03602	0.15015	0.03434	0.17227	0.03
0.17276	0.03607	0.14948	0.03434	0.17273	0.03
0.17959	0.03611	0.14567	0.03439	0.19182	0.03009
0.18831	0.03616	0.15093	0.03443	0.18034	0.03014
0.17878	0.0362	0.16243	0.03447	0.17176	0.03018
0.17782	0.03629	0.15297	0.03447	0.17985	0.03023
0.18617	0.03634	0.15271	0.03452	0.18215	0.03032
0.16767	0.03643	0.14293	0.03456	0.17276	0.03036
0.17366	0.03647	0.15386	0.03461	0.17959	0.03041
0.1774	0.03656	0.16404	0.03465	0.18831	0.03045
0.17099	0.03661	0.15553	0.03469	0.17878	0.0305
0.1911	0.0367	0.15241	0.03474	0.17782	0.03059
0.18261	0.03674	0.15587	0.03474	0.18617	0.03063
0.18031	0.03683	0.15709	0.03478	0.16767	0.03072
0.18929	0.03688	0.16874	0.03483	0.17366	0.03077
0.18544	0.03692	0.15928	0.03487	0.1774	0.03086
0.18214	0.03701	0.15289	0.03491	0.17099	0.0309
0.19442	0.03706	0.16067	0.03496	0.1911	0.03099
0.18004	0.03715	0.1718	0.035	0.18261	0.03104
0.1867	0.03719	0.16322	0.035	0.18031	0.03113
0.19029	0.03728	0.15644	0.03509	0.18929	0.03117
0.1802	0.03733	0.16476	0.03509	0.18544	0.03122
0.19679	0.03742	0.1732	0.03518	0.18214	0.0313
0.19076	0.03746	0.16603	0.03518	0.19442	0.03135
0.18913	0.03755	0.16558	0.03522	0.18004	0.03144
0.19918	0.0376	0.16468	0.03531	0.1867	0.03148
0.18068	0.03769	0.16268	0.03531	0.19029	0.03157
0.19368	0.03773	0.17428	0.03536	0.1802	0.03162
0.1891	0.03787	0.16608	0.0354	0.19679	0.03171
0.18865	0.03787	0.16178	0.03544	0.19076	0.03175
0.19614	0.038	0.16724	0.03549	0.18913	0.03184
0.18808	0.03805	0.1719	0.03553	0.19918	0.03189
0.20654	0.03814	0.16263	0.03562	0.18068	0.03198
0.19908	0.03818	0.17046	0.03566	0.19368	0.03202
0.18932	0.03823	0.16943	0.03566	0.1891	0.03216
0.2122	0.03832	0.17246	0.03575	0.18865	0.03216
0.19899	0.03841	0.16506	0.0358	0.19614	0.03229
0.21032	0.0385	0.17326	0.03584	0.18808	0.03234
0.2039	0.03854	0.18499	0.03588	0.20654	0.03243
0.20348	0.03863	0.17559	0.03593	0.19908	0.03247
0.20967	0.03872	0.17116	0.03597	0.18932	0.03252
0.20482	0.03881	0.1745	0.03602	0.2122	0.03261
0.21125	0.03886	0.17791	0.0361	0.19899	0.0327
0.19259	0.03895	0.17646	0.0361	0.21032	0.03278
0.2091	0.03904	0.17613	0.03619	0.2039	0.03283
0.19482	0.03913	0.18752	0.03624	0.20348	0.03292
0.20583	0.03917	0.17967	0.03628	0.20967	0.03301
0.21575	0.03926	0.17718	0.03632	0.20482	0.0331
0.20624	0.03935	0.17959	0.03637	0.21125	0.03314
0.21703	0.0394	0.18193	0.03646	0.19259	0.03323
0.20675	0.03953	0.17201	0.0365	0.2091	0.03332
0.22377	0.03958	0.19165	0.03659	0.19482	0.03341
0.20531	0.03967	0.18591	0.03663	0.20583	0.03346
0.22349	0.03976	0.17527	0.03668	0.21575	0.03355
0.20656	0.03985	0.18344	0.03672	0.20624	0.03364
0.22498	0.03994	0.19311	0.03677	0.21703	0.03368
0.21362	0.04003	0.17928	0.03685	0.20675	0.03382
0.2215	0.04007	0.18108	0.03685	0.22377	0.03386
0.22964	0.04016	0.18356	0.03699	0.20531	0.03395
0.21925	0.04025	0.1786	0.03703	0.22349	0.03404
0.23357	0.0403	0.17436	0.03703	0.20656	0.03413
0.22117	0.04043	0.19291	0.03712	0.22498	0.03422
0.23211	0.04048	0.18479	0.03716	0.21362	0.03431
0.21927	0.04057	0.18406	0.03729	0.2215	0.03435
0.23558	0.04066	0.19264	0.03729	0.22964	0.03444
0.22141	0.04079	0.17524	0.03738	0.21925	0.03453
0.23362	0.04084	0.18946	0.03747	0.23357	0.03458
0.21833	0.04093	0.18654	0.03751	0.22117	0.03471
0.2371	0.04102	0.18451	0.03756	0.23211	0.03476
0.22124	0.04111	0.19642	0.03765	0.21927	0.03485
0.23932	0.0412	0.17766	0.03773	0.23558	0.03494
0.23047	0.04124	0.18813	0.03778	0.22141	0.03507
0.24255	0.04138	0.19747	0.03782	0.23362	0.03512
0.23315	0.04142	0.17934	0.03791	0.21833	0.03521
0.24029	0.04156	0.18782	0.03795	0.2371	0.0353
0.22841	0.04165	0.19242	0.03804	0.22124	0.03539
0.24175	0.04174	0.18642	0.03813	0.23932	0.03547
0.23513	0.04178	0.19868	0.03817	0.23047	0.03552
0.24474	0.04192	0.1824	0.03826	0.24255	0.03565
0.23541	0.04196	0.1954	0.03835	0.23315	0.0357
0.24558	0.0421	0.19595	0.03844	0.24029	0.03583
0.22892	0.04219	0.19423	0.03848	0.22841	0.03592
0.24693	0.04232	0.20508	0.03853	0.24175	0.03601
0.23357	0.04237	0.18737	0.03862	0.23513	0.03606
0.2445	0.04246	0.19708	0.03866	0.24474	0.03619
0.23141	0.04255	0.18998	0.03879	0.23541	0.03624
0.24987	0.04264	0.19843	0.03884	0.24558	0.03637
0.2346	0.04277	0.20228	0.03892	0.22892	0.03646
0.25153	0.04282	0.19631	0.03897	0.24693	0.0366
0.23936	0.04295	0.21262	0.03906	0.23357	0.03664
0.25336	0.043	0.19833	0.03914	0.2445	0.03673
0.24293	0.04313	0.20337	0.03919	0.23141	0.03682
0.25217	0.04322	0.19919	0.03932	0.24987	0.03691
0.25541	0.04336	0.2056	0.03936	0.2346	0.03704
0.23963	0.04345	0.20777	0.03945	0.25153	0.03709
0.25569	0.04358	0.19636	0.0395	0.23936	0.03722
0.23981	0.04363	0.21282	0.03958	0.25336	0.03727
0.25354	0.04372	0.19739	0.03967	0.24293	0.0374
0.23801	0.04381	0.20377	0.03972	0.25217	0.03749
0.25924	0.0439	0.19586	0.03985	0.25541	0.03763
0.25614	0.04408	0.21191	0.03994	0.23963	0.03772
0.25543	0.04412	0.21776	0.03994	0.25569	0.03785
0.26809	0.04426	0.20582	0.04007	0.23981	0.0379
0.24075	0.04434	0.21322	0.04016	0.25354	0.03799
0.25769	0.04448	0.20649	0.04025	0.23801	0.03808
0.25005	0.04457	0.21644	0.04029	0.25924	0.03817
0.26675	0.04462	0.2138	0.04042	0.25614	0.03835
0.2665	0.0448	0.2172	0.04051	0.25543	0.03839
0.26545	0.04484	0.20466	0.04055	0.26809	0.03852
0.26813	0.04502	0.22525	0.04069	0.24075	0.03861
0.25489	0.04507	0.21108	0.04073	0.25769	0.03875
0.26522	0.0452	0.22112	0.04086	0.25005	0.03884
0.25498	0.04529	0.21171	0.04091	0.26675	0.03888
0.24648	0.04543	0.22522	0.04104	0.2665	0.03906
0.26006	0.04551	0.21473	0.04108	0.26545	0.03911
0.25013	0.04565	0.23438	0.04117	0.26813	0.03929
0.25906	0.04574	0.22039	0.04126	0.25489	0.03933
0.26634	0.04587	0.23468	0.04135	0.26522	0.03947
0.24896	0.04596	0.23048	0.04139	0.25498	0.03956
0.25418	0.04614	0.24288	0.04152	0.24648	0.03969
0.26075	0.04619	0.22401	0.04161	0.26006	0.03978
0.25888	0.04637	0.24206	0.0417	0.25013	0.03991
0.27462	0.04646	0.22485	0.04179	0.25906	0.04
0.25711	0.0465	0.24343	0.04192	0.26634	0.04014
0.26134	0.04673	0.23617	0.04196	0.24896	0.04023
0.27871	0.04682	0.24828	0.0421	0.25418	0.04041
0.27712	0.04695	0.23155	0.04214	0.26075	0.04045
0.26771	0.04704	0.24048	0.04218	0.25888	0.04063
0.272	0.04722	0.23547	0.04232	0.27462	0.04072
0.28399	0.04731	0.24226	0.04236	0.25711	0.04077
0.27475	0.04745	0.23621	0.04249	0.26134	0.04099
0.29251	0.04754	0.24855	0.04258	0.27871	0.04108
0.27437	0.04763	0.24793	0.04262	0.27712	0.04122
0.27674	0.04776	0.25405	0.04276	0.26771	0.0413
0.29162	0.04785	0.24254	0.04284	0.272	0.04148
0.27797	0.04794	0.25994	0.04293	0.28399	0.04157
0.27945	0.04812	0.24124	0.04302	0.27475	0.04171
0.28508	0.04817	0.26169	0.04315	0.29251	0.0418
0.28875	0.04839	0.24655	0.0432	0.27437	0.04189
0.27831	0.04848	0.25213	0.04324	0.27674	0.04202
0.29399	0.04862	0.24768	0.04342	0.29162	0.04211
0.27555	0.04871	0.26154	0.04346	0.27797	0.0422
0.29144	0.0488	0.25149	0.04359	0.27945	0.04238
0.2825	0.04902	0.2691	0.04368	0.28508	0.04243
0.27789	0.04907	0.24734	0.04373	0.28875	0.04265
0.2973	0.04916	0.26925	0.04386	0.27831	0.04274
0.28535	0.04938	0.25492	0.0439	0.29399	0.04287
0.29275	0.04947	0.25397	0.04408	0.27555	0.04296
0.28075	0.04961	0.26156	0.04412	0.29144	0.04305
0.28848	0.04974	0.27446	0.04417	0.2825	0.04328
0.29629	0.04983	0.26952	0.04434	0.27789	0.04332
0.3015	0.05001	0.26343	0.04439	0.2973	0.04341
0.28499	0.0501	0.27475	0.04452	0.28535	0.04364
0.28982	0.05028	0.25313	0.04461	0.29275	0.04373
0.30689	0.05037	0.26411	0.04465	0.28075	0.04386
0.28882	0.05051	0.25523	0.04483	0.28848	0.044
0.29197	0.05064	0.27186	0.04487	0.29629	0.04409
0.30973	0.05078	0.25834	0.04496	0.3015	0.04426
0.29799	0.05087	0.27073	0.04509	0.28499	0.04435
0.30036	0.05105	0.26254	0.04518	0.28982	0.04453
0.31619	0.05114	0.26022	0.04531	0.30689	0.04462
0.32154	0.05132	0.2762	0.0454	0.28882	0.04476
0.30745	0.05141	0.27182	0.04544	0.29197	0.04489
0.30754	0.05154	0.28165	0.04558	0.30973	0.04503
0.31926	0.05168	0.26494	0.04566	0.29799	0.04512
0.3206	0.05181	0.26645	0.04584	0.30036	0.0453
0.32424	0.05199	0.28016	0.04593	0.31619	0.04539
0.31445	0.05208	0.28331	0.04597	0.32154	0.04556
0.32438	0.05217	0.27943	0.04615	0.30745	0.04565
0.33027	0.05235	0.26263	0.04619	0.30754	0.04579
0.31234	0.05249	0.27162	0.04637	0.31926	0.04592
0.31417	0.05262	0.27544	0.04641	0.3206	0.04606
0.33362	0.05276	0.28025	0.0465	0.32424	0.04624
0.30669	0.05285	0.29106	0.04668	0.31445	0.04633
0.31288	0.05303	0.27207	0.04672	0.32438	0.04642
0.32713	0.05312	0.27577	0.0469	0.33027	0.0466
0.33324	0.0533	0.29361	0.04699	0.31234	0.04673
0.31326	0.05339	0.28027	0.04707	0.31417	0.04687
0.32175	0.05352	0.29579	0.04721	0.33362	0.047
0.32167	0.0537	0.28162	0.04729	0.30669	0.04709
0.3399	0.05379	0.29936	0.04738	0.31288	0.04727
0.34243	0.05402	0.29589	0.04751	0.32713	0.04736
0.32543	0.05411	0.27795	0.0476	0.33324	0.04754
0.32468	0.05429	0.27651	0.04778	0.31326	0.04763
0.34487	0.05438	0.29029	0.04787	0.32175	0.04776
0.33489	0.05451	0.27745	0.048	0.32167	0.04794
0.33501	0.05469	0.29008	0.04809	0.3399	0.04803
0.33255	0.05478	0.28016	0.04817	0.34243	0.04826
0.33487	0.05496	0.28407	0.04835	0.32543	0.04834
0.35013	0.05505	0.29248	0.04844	0.32468	0.04852
0.33581	0.05514	0.27725	0.04853	0.34487	0.04861
0.33433	0.05537	0.27405	0.0487	0.33489	0.04875
0.35332	0.05546	0.29529	0.04879	0.33501	0.04893
0.34797	0.05568	0.2992	0.04897	0.33255	0.04902
0.34963	0.05577	0.28226	0.04906	0.33487	0.0492
0.34634	0.05586	0.29771	0.04914	0.35013	0.04929
0.33755	0.05604	0.29281	0.04932	0.33581	0.04938
0.35446	0.05618	0.28396	0.04941	0.33433	0.0496
0.35603	0.05636	0.30135	0.0495	0.35332	0.04969
0.33992	0.05645	0.29355	0.04972	0.34797	0.04991
0.34205	0.05658	0.29931	0.0498	0.34963	0.05
0.34572	0.05676	0.29304	0.04994	0.34634	0.05009
0.36182	0.0569	0.30003	0.05007	0.33755	0.05027
0.35999	0.05708	0.30913	0.05016	0.35446	0.05041
0.34194	0.05717	0.31713	0.05033	0.35603	0.05059
0.35307	0.0573	0.30331	0.05042	0.33992	0.05068
0.34753	0.05753	0.29892	0.0506	0.34205	0.05081
0.36404	0.05757	0.3189	0.05069	0.34572	0.05099
0.36683	0.0578	0.29901	0.05077	0.36182	0.05113
0.36352	0.05793	0.30343	0.05095	0.35999	0.0513
0.37	0.05811	0.31907	0.05104	0.34194	0.05139
0.35292	0.05825	0.3028	0.05113	0.35307	0.05153
0.36896	0.05834	0.3009	0.0513	0.34753	0.05175
0.36242	0.05856	0.31393	0.05139	0.36404	0.0518
0.36944	0.05865	0.31541	0.05161	0.36683	0.05202
0.37257	0.05888	0.29786	0.0517	0.36352	0.05216
0.35464	0.05896	0.31606	0.05179	0.37	0.05234
0.36562	0.0591	0.30159	0.05201	0.35292	0.05247
0.3567	0.05932	0.31529	0.0521	0.36896	0.05256
0.37553	0.05942	0.3173	0.05227	0.36242	0.05278
0.36417	0.05964	0.30247	0.0524	0.36944	0.05287
0.38071	0.05977	0.31854	0.05249	0.37257	0.0531
0.36108	0.05986	0.30467	0.05271	0.35464	0.05319
0.36685	0.06009	0.31508	0.0528	0.36562	0.05332
0.36262	0.06018	0.32303	0.05298	0.3567	0.05355
0.36222	0.0604	0.30506	0.05311	0.37553	0.05364
0.37831	0.06054	0.3252	0.0532	0.36417	0.05386
0.3802	0.06063	0.30707	0.05342	0.38071	0.054
0.37739	0.0609	0.32277	0.05351	0.36108	0.05408
0.37126	0.06099	0.31043	0.05359	0.36685	0.05431
0.38654	0.06121	0.31389	0.05381	0.36262	0.0544
0.37958	0.06135	0.31556	0.05395	0.36222	0.05462
0.38722	0.06153	0.31313	0.05412	0.37831	0.05476
0.37034	0.06166	0.32833	0.05421	0.3802	0.05485
0.37754	0.0618	0.31472	0.05434	0.37739	0.05512
0.37597	0.06202	0.33224	0.05456	0.37126	0.05521
0.39652	0.06211	0.32732	0.05465	0.38654	0.05543
0.39704	0.06225	0.33383	0.05474	0.37958	0.05557
0.39918	0.06247	0.3372	0.05496	0.38722	0.05574
0.37946	0.06256	0.33573	0.05509	0.37034	0.05588
0.39957	0.06283	0.33729	0.05527	0.37754	0.05601
0.39471	0.06297	0.32401	0.0554	0.37597	0.05624
0.40697	0.06315	0.34342	0.05549	0.39652	0.05633
0.38935	0.06328	0.32976	0.05571	0.39704	0.05646
0.39717	0.06342	0.34433	0.05584	0.39918	0.05669
0.39279	0.06364	0.34907	0.05602	0.37946	0.05678
0.41454	0.06373	0.33191	0.05615	0.39957	0.05704
0.41084	0.06387	0.33443	0.05624	0.39471	0.05718
0.41777	0.06409	0.33037	0.05641	0.40697	0.05736
0.40042	0.06418	0.34199	0.05654	0.38935	0.05749
0.42158	0.06445	0.32815	0.05668	0.39717	0.05763
0.41066	0.06459	0.34393	0.0569	0.39279	0.05785
0.42543	0.06477	0.3301	0.05703	0.41454	0.05794
0.40643	0.0649	0.34543	0.05721	0.41084	0.05808
0.42187	0.06504	0.3267	0.05734	0.41777	0.0583
0.41326	0.06522	0.34519	0.05747	0.40042	0.05839
0.42791	0.06535	0.3323	0.05765	0.42158	0.05866
0.42538	0.06549	0.3512	0.05778	0.41066	0.05879
0.43126	0.06571	0.33696	0.058	0.42543	0.05897
0.41824	0.0658	0.35321	0.05809	0.40643	0.05911
0.4365	0.06607	0.33801	0.05822	0.42187	0.05924
0.42683	0.06621	0.35516	0.05844	0.41326	0.05942
0.41878	0.0663	0.34337	0.05857	0.42791	0.05956
0.42325	0.06652	0.34776	0.05879	0.42538	0.05969
0.42827	0.06666	0.34304	0.05888	0.43126	0.05991
0.42214	0.06684	0.36347	0.05901	0.41824	0.06
0.44363	0.06697	0.35638	0.05923	0.4365	0.06027
0.43797	0.06711	0.37011	0.05936	0.42683	0.06041
0.44068	0.06738	0.35486	0.05945	0.41878	0.0605
0.42896	0.06742	0.37356	0.05972	0.42325	0.06072
0.44846	0.06769	0.356	0.0598	0.42827	0.06086
0.44964	0.06783	0.37585	0.06002	0.42214	0.06104
0.45264	0.06805	0.35895	0.06016	0.44363	0.06117
0.44339	0.06819	0.35828	0.06033	0.43797	0.0613
0.44401	0.06828	0.36401	0.06047	0.44068	0.06157
0.44452	0.0685	0.37668	0.0606	0.42896	0.06162
0.45859	0.06864	0.36691	0.06082	0.44846	0.06189
0.47087	0.06873	0.382	0.06091	0.44964	0.06202
0.47145	0.06895	0.367	0.06104	0.45264	0.06225
0.45915	0.06909	0.38397	0.0613	0.44339	0.06238
0.48024	0.06931	0.37107	0.06139	0.44401	0.06247
0.47469	0.06945	0.38276	0.06161	0.44452	0.06269
0.48042	0.06963	0.36671	0.06174	0.45859	0.06283
0.46541	0.06976	0.37427	0.06188	0.47087	0.06292
0.47368	0.0699	0.36928	0.06205	0.47145	0.06314
0.46903	0.07008	0.38877	0.06218	0.45915	0.06328
0.48968	0.07021	0.37389	0.06245	0.48024	0.0635
0.47273	0.07035	0.3864	0.06258	0.47469	0.06364
0.48601	0.07053	0.39067	0.06271	0.48042	0.06382
0.47273	0.07066	0.38871	0.06293	0.46541	0.06395
0.48684	0.07089	0.38906	0.06302	0.47368	0.06409
0.4745	0.07098	0.37317	0.06315	0.46903	0.06426
0.4746	0.0712	0.39078	0.06337	0.48968	0.0644
0.47592	0.07134	0.37601	0.0635	0.47273	0.06453
0.4948	0.07147	0.39546	0.06377	0.48601	0.06471
0.49265	0.0717	0.38984	0.0639	0.47273	0.06485
0.49534	0.07179	0.38238	0.06403	0.48684	0.06507
0.50227	0.07201	0.39049	0.06425	0.4745	0.06516
0.48865	0.07215	0.38265	0.06439	0.4746	0.06539
0.48758	0.07224	0.39276	0.06452	0.47592	0.06552
0.48871	0.07246	0.38389	0.06474	0.4948	0.06565
0.5067	0.0726	0.39709	0.06487	0.49265	0.06588
0.49366	0.07282	0.39221	0.06513	0.49534	0.06597
0.50661	0.07296	0.38815	0.06527	0.50227	0.06619
0.49748	0.073	0.39215	0.06549	0.48865	0.06633
0.51318	0.07327	0.38736	0.06562	0.48758	0.06642
0.5014	0.0734	0.39622	0.06575	0.48871	0.06664
0.51627	0.07358	0.39859	0.06602	0.5067	0.06678
0.50185	0.07372	0.39563	0.0661	0.49366	0.067
0.51293	0.07386	0.4041	0.06624	0.50661	0.06713
0.50113	0.07403	0.3911	0.0665	0.49748	0.06718
0.52205	0.07417	0.40775	0.06659	0.51318	0.06745
0.50155	0.07439	0.39637	0.0669	0.5014	0.06758
0.5191	0.07448	0.39199	0.06703	0.51627	0.06776
0.50564	0.07462	0.4008	0.06716	0.50185	0.0679
0.52363	0.07484	0.39821	0.06738	0.51293	0.06803
0.50775	0.07498	0.39575	0.06756	0.50113	0.06821
0.51459	0.0752	0.41086	0.06782	0.52205	0.06834
0.51144	0.07529	0.39043	0.06791	0.50155	0.06857
0.52955	0.07543	0.39644	0.06804	0.5191	0.06866
0.51448	0.07565	0.41034	0.06835	0.50564	0.06879
0.53288	0.07579	0.40867	0.06848	0.52363	0.06902
0.51918	0.07601	0.40504	0.06875	0.50775	0.06915
0.53501	0.0761	0.41397	0.06888	0.51459	0.06938
0.52994	0.07637	0.41231	0.06906	0.51144	0.06947
0.53901	0.07651	0.40294	0.06928	0.52955	0.0696
0.51985	0.0766	0.40755	0.06945	0.51448	0.06982
0.53361	0.07682	0.41282	0.06976	0.53288	0.06996
0.52532	0.07696	0.40395	0.06989	0.51918	0.07018
0.53069	0.07714	0.40169	0.06998	0.53501	0.07027
0.53391	0.07727	0.41531	0.07029	0.52994	0.07054
0.54732	0.07741	0.41191	0.07047	0.53901	0.07068
0.53445	0.07763	0.40466	0.07073	0.51985	0.07077
0.55367	0.07772	0.41119	0.07086	0.53361	0.07099
0.54186	0.07799	0.40945	0.07104	0.52532	0.07113
0.55694	0.07813	0.40694	0.0713	0.53069	0.0713
0.54132	0.07817	0.40592	0.07143	0.53391	0.07144
0.55308	0.07844	0.42279	0.07174	0.54732	0.07157
0.53936	0.07858	0.42516	0.07192	0.53445	0.0718
0.54418	0.07876	0.42368	0.07201	0.55367	0.07189
0.5491	0.07889	0.41525	0.07232	0.54186	0.07216
0.5648	0.07903	0.419	0.07249	0.55694	0.07229
0.56022	0.07925	0.42814	0.07262	0.54132	0.07234
0.56494	0.07934	0.42999	0.07289	0.55308	0.07261
0.55411	0.07961	0.43145	0.07306	0.53936	0.07274
0.56929	0.07975	0.43522	0.07337	0.54418	0.07292
0.55192	0.07984	0.44518	0.0735	0.5491	0.07305
0.56857	0.08006	0.4534	0.07364	0.5648	0.07319
0.55586	0.0802	0.44477	0.0739	0.56022	0.07341
0.56722	0.08033	0.44667	0.07408	0.56494	0.0735
0.56146	0.08051	0.46229	0.0743	0.55411	0.07377
0.57882	0.08065	0.46131	0.07447	0.56929	0.07391
0.56499	0.08092	0.4559	0.07461	0.55192	0.074
0.57917	0.08105	0.47485	0.07483	0.56857	0.07422
0.57256	0.08114	0.46897	0.075	0.55586	0.07435
0.59308	0.08137	0.47302	0.07527	0.56722	0.07449
0.58938	0.0815	0.48423	0.0754	0.56146	0.07467
0.5926	0.08173	0.46622	0.07549	0.57882	0.0748
0.57623	0.08182	0.48104	0.0758	0.56499	0.07507
0.58222	0.08195	0.48796	0.07593	0.57917	0.07521
0.58191	0.08218	0.47707	0.07615	0.57256	0.0753
0.60301	0.08227	0.48829	0.07632	0.59308	0.07552
0.58346	0.08254	0.49272	0.07646	0.58938	0.07565
0.6026	0.08267	0.48071	0.07672	0.5926	0.07588
0.58799	0.08272	0.49976	0.07681	0.57623	0.07597
0.61087	0.08299	0.49211	0.07712	0.58222	0.0761
0.59293	0.08308	0.48556	0.07725	0.58191	0.07633
0.60985	0.0833	0.50029	0.07738	0.60301	0.07642
0.59971	0.08344	0.48722	0.0776	0.58346	0.07669
0.59917	0.08362	0.49589	0.07773	0.6026	0.07682
0.60896	0.08375	0.5074	0.07787	0.58799	0.07687
0.62104	0.08384	0.49486	0.07813	0.61087	0.07713
0.62098	0.08407	0.50257	0.07826	0.59293	0.07722
0.60718	0.0842	0.49654	0.07853	0.60985	0.07745
0.62675	0.08443	0.48813	0.07866	0.59971	0.07758
0.61508	0.08456	0.50828	0.07892	0.59917	0.07776
0.63222	0.08461	0.4973	0.07906	0.60896	0.0779
0.61503	0.08488	0.49486	0.07919	0.62104	0.07799
0.63052	0.08497	0.50816	0.07945	0.62098	0.07821
0.61885	0.08519	0.49929	0.07958	0.60718	0.07834
0.63536	0.08533	0.49225	0.07972	0.62675	0.07857
0.61898	0.08542	0.50485	0.08003	0.61508	0.0787
0.63271	0.08564	0.50284	0.08011	0.63222	0.07875
0.62112	0.08573	0.49748	0.08042	0.61503	0.07902
0.63527	0.086	0.50917	0.08055	0.63052	0.07911
0.62578	0.08614	0.51271	0.08073	0.61885	0.07933
0.64484	0.08618	0.50427	0.08095	0.63536	0.07947
0.63683	0.08645	0.50577	0.08113	0.61898	0.07956
0.64317	0.08654	0.5264	0.08139	0.63271	0.07978
0.64322	0.08677	0.51433	0.08152	0.62112	0.07987
0.6358	0.0869	0.51243	0.08165	0.63527	0.08014
0.64918	0.08708	0.52697	0.08196	0.62578	0.08027
0.63307	0.08721	0.53573	0.0821	0.64484	0.08032
0.64297	0.08735	0.52223	0.08232	0.63683	0.08059
0.63606	0.08757	0.53064	0.08249	0.64317	0.08068
0.65368	0.08766	0.53895	0.08262	0.64322	0.0809
0.64214	0.0878	0.52375	0.08284	0.6358	0.08104
0.66045	0.08802	0.53247	0.08302	0.64918	0.08122
0.64604	0.08812	0.54625	0.08315	0.63307	0.08135
0.66301	0.08834	0.53186	0.08346	0.64297	0.08148
0.64429	0.08847	0.53314	0.08359	0.63606	0.08171
0.6531	0.08865	0.54945	0.08386	0.65368	0.0818
0.65512	0.08879	0.54695	0.08399	0.64214	0.08193
0.67264	0.08892	0.5389	0.08412	0.66045	0.08216
0.65364	0.08915	0.55745	0.08439	0.64604	0.08225
0.67186	0.08924	0.55098	0.08452	0.66301	0.08247
0.6586	0.08937	0.54888	0.08478	0.64429	0.08261
0.68115	0.0896	0.5587	0.08496	0.6531	0.08278
0.67071	0.08969	0.56216	0.08509	0.65512	0.08292
0.66679	0.08991	0.55488	0.08531	0.67264	0.08305
0.68674	0.09	0.57042	0.08544	0.65364	0.08328
0.68079	0.09023	0.56869	0.08562	0.67186	0.08337
0.69014	0.09032	0.55955	0.08588	0.6586	0.0835
0.69532	0.09054	0.57727	0.08597	0.68115	0.08373
0.67766	0.09063	0.56771	0.08628	0.67071	0.08382
0.68617	0.09077	0.56483	0.08641	0.66679	0.08404
0.67922	0.09099	0.57212	0.08654	0.68674	0.08413
0.70124	0.09108	0.57172	0.08676	0.68079	0.08435
0.68861	0.09131	0.57158	0.0869	0.69014	0.08444
0.69854	0.0914	0.59259	0.08721	0.69532	0.08467
0.68209	0.09153	0.57615	0.08729	0.67766	0.08476
0.68604	0.09176	0.5892	0.08743	0.68617	0.08489
0.68711	0.09185	0.59739	0.08769	0.67922	0.08512
0.69488	0.09212	0.58429	0.08778	0.70124	0.08521
0.71211	0.09216	0.60473	0.08804	0.68861	0.08543
0.6973	0.09239	0.59118	0.08817	0.69854	0.08552
0.7113	0.09252	0.59362	0.08831	0.68209	0.08565
0.71769	0.0927	0.59523	0.08853	0.68604	0.08588
0.71353	0.09284	0.59412	0.08866	0.68711	0.08597
0.70643	0.09293	0.61481	0.08879	0.69488	0.08624
0.70262	0.09311	0.60136	0.08901	0.71211	0.08628
0.72199	0.09324	0.62005	0.08914	0.6973	0.08651
0.70544	0.09347	0.60683	0.08941	0.7113	0.08664
0.72297	0.0936	0.61329	0.08954	0.71769	0.08682
0.71201	0.09365	0.61626	0.08976	0.71353	0.08695
0.72297	0.09392	0.62305	0.08989	0.70643	0.08704
0.71408	0.09401	0.63868	0.09002	0.70262	0.08722
0.71397	0.09419	0.63233	0.09025	0.72199	0.08736
0.73201	0.09432	0.64173	0.09038	0.70544	0.08758
0.72024	0.09455	0.62296	0.09047	0.72297	0.08772
0.72808	0.09464	0.64553	0.09073	0.71201	0.08776
0.73873	0.09486	0.62707	0.09082	0.72297	0.08803
0.72496	0.09495	0.64991	0.09108	0.71408	0.08812
0.74078	0.09504	0.64264	0.09121	0.71397	0.0883
0.73171	0.09527	0.65582	0.09143	0.73201	0.08843
0.75106	0.09536	0.64101	0.09152	0.72024	0.08866
0.75022	0.09558	0.64066	0.09166	0.72808	0.08875
0.72999	0.09567	0.64833	0.09192	0.73873	0.08897
0.74797	0.0959	0.66278	0.09201	0.72496	0.08906
0.73062	0.09599	0.6641	0.0921	0.74078	0.08915
0.73166	0.09621	0.65684	0.09236	0.73171	0.08938
0.7486	0.0963	0.66994	0.09249	0.75106	0.08947
0.74171	0.09653	0.67289	0.09267	0.75022	0.08969
0.75603	0.09662	0.6661	0.0928	0.72999	0.08978
0.74014	0.09675	0.6567	0.09293	0.74797	0.09
0.75382	0.09698	0.65762	0.09311	0.73062	0.09009
0.74248	0.09707	0.67578	0.09324	0.73166	0.09032
0.75592	0.0972	0.66056	0.09346	0.7486	0.09041
0.73946	0.09743	0.67867	0.09355	0.74171	0.09063
0.75406	0.09756	0.66691	0.09377	0.75603	0.09072
0.76068	0.09774	0.68251	0.0939	0.74014	0.09086
0.76587	0.09788	0.67026	0.09403	0.75382	0.09108
0.74964	0.09801	0.67634	0.09421	0.74248	0.09117
0.76873	0.09824	0.66207	0.09434	0.75592	0.0913
0.75764	0.09833	0.67297	0.09447	0.73946	0.09153
0.7681	0.09842	0.66809	0.09469	0.75406	0.09166
0.76001	0.09869	0.67699	0.09483	0.76068	0.09184
0.77366	0.09882	0.67517	0.09505	0.76587	0.09198
0.77606	0.099	0.68987	0.09518	0.74964	0.09211
0.75968	0.09914	0.69216	0.09527	0.76873	0.09234
0.75825	0.09923	0.69073	0.09553	0.75764	0.09243
0.75907	0.09945	0.68643	0.09562	0.7681	0.09252
0.77512	0.09959	0.69729	0.09584	0.76001	0.09278
0.75795	0.09981	0.69611	0.09597	0.77366	0.09292
0.7694	0.09995	0.70483	0.09619	0.77606	0.0931
0.75893	0.09999	0.68906	0.09628	0.75968	0.09323
0.78269	0.10026	0.69194	0.09641	0.75825	0.09332
0.77619	0.1004	0.69285	0.09663	0.75907	0.09355
0.78501	0.10058	0.708	0.09672	0.77512	0.09368
0.768	0.10071	0.691	0.09699	0.75795	0.09391
0.7775	0.10085	0.69696	0.09712	0.7694	0.09404
0.76949	0.10103	0.69847	0.09721	0.75893	0.09408
0.78504	0.10116	0.69588	0.09743	0.78269	0.09435
0.77159	0.10143	0.6923	0.09756	0.77619	0.09449
0.78913	0.10152	0.67699	0.09769	0.78501	0.09467
0.77223	0.10161	0.69246	0.09791	0.768	0.0948
0.78882	0.10188	0.67973	0.09804	0.7775	0.09494
0.78313	0.10202	0.69597	0.09831	0.76949	0.09512
0.79482	0.10219	0.69185	0.09844	0.78504	0.09525
0.77447	0.10233	0.69449	0.0987	0.77159	0.09552
0.77959	0.10247	0.69995	0.09884	0.78913	0.09561
0.7792	0.10273	0.69323	0.09897	0.77223	0.0957
0.79373	0.10282	0.7087	0.09919	0.78882	0.09597
0.78039	0.10305	0.70797	0.09932	0.78313	0.0961
0.78386	0.10318	0.69427	0.09945	0.79482	0.09628
0.79865	0.10332	0.70978	0.09976	0.77447	0.09642
0.79005	0.10354	0.69971	0.09985	0.77959	0.09655
0.7971	0.10368	0.70983	0.10011	0.7792	0.09682
0.78627	0.10381	0.7142	0.10024	0.79373	0.09691
0.80247	0.10404	0.71192	0.10047	0.78039	0.09713
0.78108	0.10413	0.71322	0.1006	0.78386	0.09727
0.80278	0.1044	0.7075	0.10073	0.79865	0.0974
0.80437	0.10453	0.71881	0.10095	0.79005	0.09763
0.79383	0.10462	0.71765	0.10108	0.7971	0.09776
0.80009	0.10489	0.71626	0.10139	0.78627	0.0979
0.78899	0.10503	0.73146	0.10148	0.80247	0.09812
0.79817	0.10525	0.72435	0.10161	0.78108	0.09821
0.79473	0.10539	0.72811	0.10187	0.80278	0.09848
0.80609	0.10552	0.73639	0.10201	0.80437	0.09861
0.80023	0.10575	0.73875	0.10223	0.79383	0.0987
0.8114	0.10588	0.74965	0.10236	0.80009	0.09897
0.8042	0.10615	0.73954	0.10249	0.78899	0.09911
0.80782	0.10629	0.74916	0.10271	0.79817	0.09933
0.80782	0.10647	0.74486	0.10284	0.79473	0.09947
0.81297	0.1066	0.72809	0.10298	0.80609	0.0996
0.8258	0.10674	0.74891	0.10324	0.80023	0.09983
0.81669	0.10696	0.73516	0.10328	0.8114	0.09996
0.83082	0.1071	0.75322	0.10359	0.8042	0.10023
0.82254	0.10732	0.73839	0.10368	0.80782	0.10036
0.82943	0.10746	0.76128	0.1039	0.80782	0.10054
0.82132	0.10759	0.74776	0.10403	0.81297	0.10068
0.83564	0.10782	0.74758	0.10417	0.8258	0.10081
0.82873	0.10795	0.76967	0.10443	0.81669	0.10104
0.83959	0.10822	0.75644	0.10452	0.83082	0.10117
0.83977	0.10836	0.77232	0.10465	0.82254	0.10139
0.8225	0.1084	0.75492	0.10491	0.82943	0.10153
0.83873	0.10872	0.76186	0.10505	0.82132	0.10166
0.82383	0.10881	0.7538	0.10527	0.83564	0.10189
0.84284	0.10903	0.77058	0.1054	0.82873	0.10202
0.82921	0.10917	0.77768	0.10553	0.83959	0.10229
0.84736	0.10939	0.77455	0.10575	0.83977	0.10243
0.83185	0.10953	0.78149	0.10588	0.8225	0.10247
0.83308	0.10966	0.76509	0.1061	0.83873	0.10278
0.82989	0.10989	0.78519	0.10624	0.82383	0.10287
0.83256	0.11002	0.76785	0.10632	0.84284	0.1031
0.8506	0.11029	0.78628	0.10659	0.82921	0.10323
0.83583	0.11038	0.78631	0.10672	0.84736	0.10346
0.85896	0.11052	0.78747	0.10694	0.83185	0.10359
0.84034	0.11079	0.78467	0.10707	0.83308	0.10373
0.8407	0.11092	0.77268	0.10721	0.82989	0.10395
0.84706	0.11119	0.7868	0.10747	0.83256	0.10408
0.84898	0.11133	0.77232	0.10756	0.8506	0.10435
0.84726	0.11155	0.78856	0.10769	0.83583	0.10444
0.84236	0.11169	0.78796	0.10795	0.85896	0.10458
0.85789	0.11182	0.7856	0.10809	0.84034	0.10485
0.84818	0.11205	0.78619	0.10831	0.8407	0.10498
0.86422	0.11218	0.78345	0.10844	0.84706	0.10525
0.86008	0.11245	0.79374	0.10857	0.84898	0.10539
0.85871	0.11254	0.79329	0.10884	0.84726	0.10561
0.86871	0.11268	0.79083	0.10892	0.84236	0.10574
0.85062	0.11295	0.7931	0.10914	0.85789	0.10588
0.87478	0.11304	0.80094	0.10928	0.84818	0.1061
0.85823	0.11335	0.81864	0.10941	0.86422	0.10624
0.85559	0.11349	0.79897	0.10967	0.86008	0.10651
0.87559	0.11358	0.82044	0.10976	0.85871	0.1066
0.86195	0.11385	0.81435	0.10989	0.86871	0.10673
0.8671	0.11398	0.81603	0.11016	0.85062	0.107
0.86338	0.11421	0.82025	0.11029	0.87478	0.10709
0.86578	0.11434	0.82157	0.11051	0.85823	0.1074
0.88436	0.11452	0.82739	0.11064	0.85559	0.10754
0.87121	0.11475	0.81299	0.11077	0.87559	0.10763
0.88329	0.11488	0.83066	0.11095	0.86195	0.1079
0.88376	0.11515	0.81989	0.11108	0.8671	0.10803
0.88502	0.11524	0.83407	0.11135	0.86338	0.10826
0.89408	0.11551	0.83271	0.11148	0.86578	0.10839
0.87997	0.11564	0.82489	0.11157	0.88436	0.10857
0.87801	0.11578	0.82929	0.11183	0.87121	0.10879
0.88368	0.11605	0.82632	0.11196	0.88329	0.10893
0.88461	0.11619	0.83285	0.11218	0.88376	0.1092
0.89408	0.11641	0.83043	0.11227	0.88502	0.10929
0.88637	0.11654	0.84893	0.1124	0.89408	0.10956
0.88981	0.11668	0.83915	0.11262	0.87997	0.10969
0.88587	0.1169	0.85498	0.11276	0.87801	0.10982
0.89417	0.11704	0.83643	0.11302	0.88368	0.11009
0.91173	0.11735	0.84819	0.11315	0.88461	0.11023
0.90439	0.11749	0.83705	0.11324	0.89408	0.11045
0.90789	0.11758	0.85744	0.11346	0.88637	0.11059
0.9048	0.11785	0.85678	0.11359	0.88981	0.11072
0.90073	0.11798	0.86094	0.11381	0.88587	0.11095
0.92225	0.11821	0.85897	0.11395	0.89417	0.11108
0.90577	0.11834	0.84743	0.11408	0.91173	0.11139
0.92618	0.11857	0.86251	0.11434	0.90439	0.11153
0.91432	0.1187	0.84747	0.11443	0.90789	0.11162
0.91934	0.11884	0.86191	0.11456	0.9048	0.11189
0.93911	0.11911	0.84802	0.11478	0.90073	0.11202
0.92166	0.1192	0.85024	0.11491	0.92225	0.11225
0.93893	0.11933	0.85194	0.11514	0.90577	0.11238
0.92841	0.1196	0.85439	0.11527	0.92618	0.11261
0.94549	0.11969	0.85401	0.11549	0.91432	0.11274
0.93257	0.11996	0.86233	0.11562	0.91934	0.11287
0.93656	0.1201	0.86974	0.11575	0.93911	0.11314
0.93283	0.12032	0.859	0.11602	0.92166	0.11323
0.94437	0.12046	0.87729	0.1161	0.93893	0.11337
0.9578	0.12059	0.87269	0.11624	0.92841	0.11364
0.9511	0.12082	0.8799	0.1165	0.94549	0.11373
0.96101	0.12095	0.88521	0.11659	0.93257	0.114
0.94945	0.12118	0.88724	0.11681	0.93656	0.11413
0.96938	0.12127	0.88596	0.11694	0.93283	0.11435
0.95828	0.1214	0.87389	0.11707	0.94437	0.11449
0.97689	0.12167	0.88784	0.11729	0.9578	0.11462
0.96164	0.12176	0.87857	0.11743	0.9511	0.11485
0.98204	0.12199	0.89821	0.11769	0.96101	0.11498
0.97136	0.12212	0.87949	0.11778	0.94945	0.11521
0.97883	0.12226	0.89753	0.11787	0.96938	0.1153
0.97417	0.12244	0.88565	0.11813	0.95828	0.11543
0.98938	0.12257	0.89048	0.11826	0.97689	0.1157
0.9874	0.1228	0.88745	0.11848	0.96164	0.11579
0.99657	0.12289	0.90573	0.11861	0.98204	0.11601
0.9825	0.12302	0.91023	0.11875	0.97136	0.11615
0.99874	0.12329	0.89348	0.11897	0.97883	0.11628
0.98571	0.12334	0.90988	0.11906	0.97417	0.11646
0.99716	0.12361	0.908	0.11932	0.98938	0.1166
0.99246	0.1237	0.92311	0.11945	0.9874	0.11682
0.99427	0.12392	0.90316	0.1195	0.99657	0.11691
1.00136	0.12406	0.91852	0.11976	0.9825	0.11704
1.00634	0.12415	0.90614	0.11989	0.99874	0.11731
1.00051	0.12437	0.91095	0.12007	0.98571	0.11736
0.99039	0.12451	0.91452	0.1202	0.99716	0.11763
0.98941	0.1246	0.92932	0.12033	0.99246	0.11772
0.98531	0.12482	0.91177	0.1206	0.99427	0.11794
0.99039	0.12496	0.92888	0.12069	1.00136	0.11808
0.9908	0.12523	0.92058	0.12091	1.00634	0.11817
0.99645	0.12532	0.94038	0.12104	1.00051	0.11839
0.9893	0.12554	0.94202	0.12126	0.99039	0.11852
1.00056	0.12568	0.94128	0.12135	0.98941	0.11861
1.0135	0.12577	0.92831	0.12148	0.98531	0.11884
1.01413	0.12604	0.94579	0.1217	0.99039	0.11897
1.01833	0.12617	0.93196	0.12179	0.9908	0.11924
1.01941	0.12635	0.94654	0.12205	0.99645	0.11933
1.01259	0.12649	0.9394	0.12214	0.9893	0.11956
0.99801	0.12662	0.94041	0.12236	1.00056	0.11969
1.01116	0.12685	0.95821	0.12249	1.0135	0.11978
1.00392	0.12694	0.96496	0.12258	1.01413	0.12005
1.02597	0.12721	0.96872	0.1228	1.01833	0.12018
1.00836	0.12734	0.95247	0.12289	1.01941	0.12036
1.02792	0.12743	0.94704	0.12302	1.01259	0.1205
1.00285	0.1277	0.95661	0.12329	0.99801	0.12063
1.0175	0.12784	0.97166	0.12333	1.01116	0.12086
1.01541	0.12802	0.95877	0.12359	1.00392	0.12095
1.03605	0.12815	0.97417	0.12368	1.02597	0.12122
1.02338	0.12838	0.96273	0.1239	1.00836	0.12135
1.04275	0.12851	0.98065	0.12403	1.02792	0.12144
1.03748	0.12865	0.96533	0.12412	1.00285	0.12171
1.04352	0.12892	0.98074	0.12434	1.0175	0.12184
1.03176	0.12896	0.97577	0.12443	1.01541	0.12202
1.05489	0.12923	0.99505	0.12456	1.03605	0.12216
1.0401	0.12937	0.97842	0.12478	1.02338	0.12238
1.0489	0.12946	0.98921	0.12487	1.04275	0.12252
1.04376	0.12968	0.99578	0.12509	1.03748	0.12265
1.0534	0.12982	0.97673	0.12518	1.04352	0.12292
1.04775	0.12999	0.97935	0.1254	1.03176	0.12296
1.06518	0.13013	0.98003	0.12549	1.05489	0.12323
1.0582	0.13026	0.99952	0.12562	1.0401	0.12337
1.06917	0.13045	0.99465	0.12584	1.0489	0.12346
1.05915	0.13058	0.98663	0.12588	1.04376	0.12368
1.07395	0.13081	1.0055	0.12615	1.0534	0.12382
1.06004	0.1309	0.98745	0.12624	1.04775	0.124
1.05545	0.13112	1.00068	0.12646	1.06518	0.12413
1.06448	0.13125	0.99902	0.12654	1.0582	0.12426
1.06735	0.13134	1.01771	0.12663	1.06917	0.12444
1.0851	0.13157	1.01899	0.12685	1.05915	0.12458
1.08418	0.1317	0.99821	0.12694	1.07395	0.1248
1.08978	0.13188	1.01611	0.12716	1.06004	0.12489
1.07498	0.13202	1.00265	0.12729	1.05545	0.12512
1.09511	0.13211	1.00698	0.12747	1.06448	0.12525
1.08445	0.13233	1.02972	0.1276	1.06735	0.12534
1.09662	0.13247	1.02581	0.12769	1.0851	0.12557
1.09304	0.13269	1.02921	0.12787	1.08418	0.1257
1.08186	0.13274	1.00879	0.128	1.08978	0.12588
1.1015	0.13301	1.01517	0.12822	1.07498	0.12601
1.08883	0.1331	1.01636	0.12831	1.09511	0.1261
1.09145	0.13328	1.01998	0.12848	1.08445	0.12633
1.09482	0.13341	1.03823	0.12861	1.09662	0.12646
1.10836	0.1335	1.03194	0.12884	1.09304	0.12669
1.1107	0.13373	1.02417	0.12888	1.08186	0.12673
1.09414	0.13382	1.0473	0.1291	1.1015	0.127
1.11871	0.13404	1.03095	0.12923	1.08883	0.12709
1.11282	0.13413	1.03222	0.12941	1.09145	0.12727
1.10251	0.13436	1.05382	0.1295	1.09482	0.1274
1.11353	0.13445	1.03276	0.12958	1.10836	0.12749
1.11771	0.13463	1.05651	0.1298	1.1107	0.12772
1.11209	0.13476	1.03922	0.12989	1.09414	0.12781
1.12059	0.13499	1.03876	0.13011	1.11871	0.12803
1.10111	0.13508	1.0582	0.1302	1.11282	0.12812
1.12008	0.1353	1.06405	0.13038	1.10251	0.12835
1.10904	0.13539	1.0555	0.13051	1.11353	0.12843
1.12387	0.13548	1.05154	0.1306	1.11771	0.12861
1.12208	0.13575	1.05485	0.13077	1.11209	0.12875
1.12716	0.13584	1.07171	0.13086	1.12059	0.12897
1.12811	0.13607	1.07093	0.13108	1.10111	0.12906
1.11274	0.13616	1.05409	0.13117	1.12008	0.12929
1.12918	0.13638	1.06167	0.13135	1.10904	0.12938
1.1253	0.13647	1.06107	0.13148	1.12387	0.12947
1.14171	0.13661	1.06	0.1317	1.12208	0.12974
1.14487	0.13679	1.08095	0.13179	1.12716	0.12983
1.13296	0.13692	1.06421	0.13187	1.12811	0.13005
1.14875	0.13715	1.07887	0.1321	1.11274	0.13014
1.13613	0.13724	1.0678	0.13218	1.12918	0.13036
1.14769	0.13746	1.06771	0.13236	1.1253	0.13045
1.14555	0.13755	1.08516	0.13249	1.14171	0.13059
1.14518	0.13773	1.0655	0.13258	1.14487	0.13077
1.1571	0.13782	1.06938	0.13276	1.13296	0.1309
1.1429	0.13796	1.06971	0.13289	1.14875	0.13113
1.16794	0.13818	1.06978	0.13311	1.13613	0.13122
1.16817	0.13827	1.08643	0.1332	1.14769	0.13144
1.15524	0.13845	1.09034	0.13337	1.14555	0.13153
1.16954	0.13859	1.09007	0.13351	1.14518	0.13171
1.17191	0.13877	1.09478	0.13373	1.1571	0.1318
1.15631	0.13886	1.07722	0.13377	1.1429	0.13193
1.17791	0.13908	1.09245	0.1339	1.16794	0.13216
1.17289	0.13917	1.08199	0.13412	1.16817	0.13225
1.15995	0.13935	1.09547	0.13425	1.15524	0.13243
1.17884	0.13949	1.10116	0.13443	1.16954	0.13256
1.18307	0.13967	1.08447	0.13452	1.17191	0.13274
1.16722	0.13976	1.09147	0.13474	1.15631	0.13283
1.18924	0.13985	1.08391	0.13483	1.17791	0.13305
1.18679	0.14003	1.0979	0.13496	1.17289	0.13314
1.18726	0.14016	1.09019	0.13518	1.15995	0.13332
1.18554	0.14039	1.10674	0.13527	1.17884	0.13346
1.16866	0.14048	1.10832	0.13549	1.18307	0.13364
1.1798	0.1407	1.09415	0.13558	1.16722	0.13373
1.17166	0.14079	1.10659	0.13571	1.18924	0.13382
1.17475	0.14097	1.09678	0.13593	1.18679	0.134
1.19153	0.14111	1.11452	0.13602	1.18726	0.13413
1.1749	0.1412	1.11186	0.13624	1.18554	0.13435
1.19367	0.14142	1.12297	0.13632	1.16866	0.13444
1.17634	0.14151	1.10839	0.13646	1.1798	0.13467
1.18991	0.14165	1.11378	0.13663	1.17166	0.13476
1.17761	0.14187	1.13057	0.13672	1.17475	0.13494
1.17943	0.14196	1.11457	0.13694	1.19153	0.13507
1.20266	0.14219	1.13533	0.13707	1.1749	0.13516
1.18559	0.14228	1.11948	0.13712	1.19367	0.13539
1.18967	0.14246	1.12315	0.13734	1.17634	0.13547
1.19279	0.14259	1.12404	0.13747	1.18991	0.13561
1.18986	0.14282	1.12893	0.13765	1.17761	0.13583
1.21033	0.14286	1.14142	0.13773	1.17943	0.13592
1.20916	0.14313	1.14664	0.13795	1.20266	0.13615
1.21005	0.14322	1.12913	0.138	1.18559	0.13624
1.20925	0.1434	1.13415	0.13822	1.18967	0.13642
1.18975	0.14354	1.1346	0.13835	1.19279	0.13655
1.20181	0.14367	1.15191	0.13844	1.18986	0.13678
1.19679	0.14385	1.15231	0.13862	1.21033	0.13682
1.21025	0.14399	1.1374	0.13875	1.20916	0.13709
1.18808	0.14408	1.15462	0.13897	1.21005	0.13718
1.20103	0.1443	1.14346	0.13906	1.20925	0.13736
1.19127	0.14444	1.16047	0.13914	1.18975	0.13749
1.21146	0.14466	1.16402	0.13936	1.20181	0.13763
1.19903	0.14475	1.14811	0.13945	1.19679	0.13781
1.19693	0.14502	1.15326	0.13963	1.21025	0.13794
1.19925	0.14511	1.15921	0.13976	1.18808	0.13803
1.21455	0.1452	1.15391	0.13994	1.20103	0.13826
1.20843	0.14547	1.16555	0.14002	1.19127	0.13839
1.22061	0.1456	1.15448	0.14011	1.21146	0.13861
1.22186	0.14578	1.15606	0.14033	1.19903	0.1387
1.21595	0.14592	1.15988	0.14047	1.19693	0.13897
1.20089	0.14605	1.16705	0.14064	1.19925	0.13906
1.20966	0.14628	1.18421	0.14073	1.21455	0.13915
1.21113	0.14637	1.16762	0.14086	1.20843	0.13942
1.22831	0.14664	1.16887	0.14104	1.22061	0.13956
1.2128	0.14677	1.18518	0.14113	1.22186	0.13973
1.22922	0.14686	1.17276	0.14135	1.21595	0.13987
1.21757	0.14709	1.19567	0.14148	1.20089	0.14
1.23754	0.14722	1.1787	0.14157	1.20966	0.14023
1.23986	0.14745	1.182	0.14174	1.21113	0.14032
1.24743	0.14754	1.19245	0.14187	1.22831	0.14059
1.23233	0.14767	1.20259	0.14201	1.2128	0.14072
1.25238	0.1479	1.19581	0.14214	1.22922	0.14081
1.23834	0.14799	1.20068	0.14232	1.21757	0.14104
1.24392	0.14826	1.18521	0.14245	1.23754	0.14117
1.24159	0.14835	1.20148	0.14249	1.23986	0.14139
1.25836	0.14848	1.19934	0.14271	1.24743	0.14148
1.25666	0.14866	1.19422	0.14284	1.23233	0.14162
1.25461	0.1488	1.18625	0.14293	1.25238	0.14184
1.24101	0.14889	1.18733	0.14311	1.23834	0.14193
1.24052	0.14911	1.20289	0.1432	1.24392	0.1422
1.25031	0.14925	1.20749	0.14342	1.24159	0.14229
1.24906	0.14947	1.18977	0.1435	1.25836	0.14243
1.25941	0.14961	1.20422	0.14373	1.25666	0.14261
1.25935	0.14979	1.19585	0.14381	1.25461	0.14274
1.2662	0.14992	1.19968	0.14399	1.24101	0.14283
1.27101	0.1501	1.21513	0.14408	1.24052	0.14305
1.2648	0.15024	1.22032	0.1443	1.25031	0.14319
1.25866	0.15033	1.20201	0.14439	1.24906	0.14341
1.2733	0.1506	1.20754	0.14461	1.25941	0.14355
1.27906	0.15069	1.20647	0.14469	1.25935	0.14373
1.26759	0.15091	1.22255	0.14483	1.2662	0.14386
1.28254	0.15105	1.22186	0.145	1.27101	0.14404
1.26596	0.15109	1.2078	0.14509	1.2648	0.14417
1.28627	0.15136	1.22702	0.14531	1.25866	0.14426
1.27001	0.15145	1.21187	0.14544	1.2733	0.14453
1.28225	0.15168	1.2275	0.14549	1.27906	0.14462
1.2781	0.15177	1.23292	0.14571	1.26759	0.14485
1.29164	0.1519	1.2334	0.14584	1.28254	0.14498
1.27443	0.15213	1.23437	0.14602	1.26596	0.14503
1.28997	0.15222	1.2182	0.1461	1.28627	0.1453
1.28808	0.15249	1.23654	0.14624	1.27001	0.14539
1.29027	0.15258	1.22711	0.14646	1.28225	0.14561
1.27724	0.15267	1.2261	0.1465	1.2781	0.1457
1.27966	0.15294	1.24762	0.14672	1.29164	0.14583
1.28131	0.15303	1.23665	0.14685	1.27443	0.14606
1.28294	0.15325	1.24011	0.14703	1.28997	0.14615
1.2948	0.15339	1.25637	0.14712	1.28808	0.14642
1.30434	0.15348	1.24858	0.14725	1.29027	0.14651
1.30613	0.1537	1.26177	0.14743	1.27724	0.1466
1.29837	0.15384	1.25135	0.14751	1.27966	0.14687
1.31606	0.15406	1.25445	0.14769	1.28131	0.14695
1.31448	0.1542	1.27596	0.14782	1.28294	0.14718
1.31803	0.15429	1.258	0.14791	1.2948	0.14731
1.30568	0.15451	1.25755	0.14809	1.30434	0.1474
1.32797	0.1546	1.27694	0.14817	1.30613	0.14763
1.32242	0.15483	1.26034	0.14839	1.29837	0.14776
1.33771	0.15492	1.26914	0.14848	1.31606	0.14799
1.34084	0.15514	1.26237	0.14857	1.31448	0.14812
1.3271	0.15523	1.26146	0.14879	1.31803	0.14821
1.33473	0.15537	1.28112	0.14888	1.30568	0.14843
1.33675	0.15555	1.28544	0.14906	1.32797	0.14852
1.34819	0.15564	1.26681	0.14914	1.32242	0.14875
1.33243	0.15577	1.2815	0.14928	1.33771	0.14884
1.33071	0.15595	1.2841	0.14945	1.34084	0.14906
1.34887	0.15604	1.28769	0.14954	1.3271	0.14915
1.33852	0.15627	1.27385	0.14963	1.33473	0.14929
1.35873	0.1564	1.27898	0.14985	1.33675	0.14947
1.36592	0.15658	1.29902	0.14989	1.34819	0.14956
1.36515	0.15672	1.29993	0.15011	1.33243	0.14969
1.35503	0.15681	1.28284	0.1502	1.33071	0.14987
1.35531	0.15699	1.28117	0.15038	1.34887	0.14996
1.37376	0.15708	1.2846	0.15051	1.33852	0.15018
1.38261	0.1573	1.30067	0.1506	1.35873	0.15032
1.36242	0.15739	1.30069	0.15082	1.36592	0.1505
1.38376	0.15748	1.28628	0.15091	1.36515	0.15063
1.37437	0.15771	1.30227	0.15099	1.35503	0.15072
1.3734	0.15775	1.28805	0.15121	1.35531	0.1509
1.3953	0.15798	1.30725	0.1513	1.37376	0.15099
1.38232	0.15807	1.31182	0.15148	1.38261	0.15121
1.39861	0.15816	1.29376	0.15161	1.36242	0.1513
1.39953	0.15834	1.31414	0.1517	1.38376	0.15139
1.38494	0.15847	1.3147	0.15188	1.37437	0.15162
1.38334	0.15861	1.29893	0.15196	1.3734	0.15166
1.40504	0.15874	1.31592	0.15218	1.3953	0.15189
1.38869	0.15883	1.30392	0.15232	1.38232	0.15198
1.39842	0.15901	1.32245	0.15236	1.39861	0.15207
1.40873	0.1591	1.32327	0.15258	1.39953	0.15225
1.40855	0.15933	1.30586	0.15267	1.38494	0.15238
1.4147	0.15942	1.30921	0.15284	1.38334	0.15252
1.41061	0.15955	1.31425	0.15298	1.40504	0.15265
1.40665	0.15968	1.32586	0.15306	1.38869	0.15274
1.42423	0.15977	1.32439	0.15329	1.39842	0.15292
1.42516	0.15995	1.30678	0.15333	1.40873	0.15301
1.4185	0.16004	1.33026	0.15346	1.40855	0.15323
1.4354	0.16013	1.3134	0.15368	1.4147	0.15332
1.42027	0.16027	1.32842	0.15377	1.41061	0.15346
1.41926	0.1604	1.33112	0.15395	1.40665	0.15359
1.42037	0.16058	1.31286	0.15408	1.42423	0.15368
1.42778	0.16063	1.33702	0.15417	1.42516	0.15386
1.44282	0.16085	1.31978	0.15439	1.4185	0.15395
1.42492	0.16094	1.33567	0.15447	1.4354	0.15404
1.43118	0.16099	1.34589	0.15469	1.42027	0.15417
1.4454	0.16121	1.32656	0.15478	1.41926	0.15431
1.43069	0.1613	1.34257	0.15491	1.42037	0.15449
1.43879	0.16148	1.34408	0.15509	1.42778	0.15453
1.45229	0.16157	1.35219	0.15518	1.44282	0.15476
1.43468	0.16166	1.3367	0.15527	1.42492	0.15485
1.44639	0.1618	1.33112	0.15549	1.43118	0.15489
1.44745	0.16193	1.34272	0.15558	1.4454	0.15512
1.45755	0.16211	1.33295	0.1558	1.43069	0.15521
1.45862	0.16216	1.3425	0.15588	1.43879	0.15539
1.45549	0.16229	1.33134	0.15602	1.45229	0.15548
1.4634	0.16247	1.33015	0.15619	1.43468	0.15557
1.46508	0.16252	1.35261	0.15628	1.44639	0.1557
1.46345	0.1627	1.33811	0.1565	1.44745	0.15583
1.46348	0.16283	1.36001	0.15659	1.45755	0.15601
1.45268	0.16297	1.34729	0.15672	1.45862	0.15606
1.47297	0.16306	1.35774	0.15694	1.45549	0.15619
1.46432	0.16315	1.3699	0.15699	1.4634	0.15637
1.46015	0.16333	1.35101	0.15721	1.46508	0.15642
1.48315	0.16342	1.37039	0.15729	1.46345	0.1566
1.48999	0.1636	1.35384	0.15743	1.46348	0.15673
1.47913	0.16369	1.35445	0.1576	1.45268	0.15687
1.49335	0.16378	1.37208	0.15769	1.47297	0.15695
1.49911	0.16396	1.35939	0.15791	1.46432	0.15704
1.48038	0.16405	1.37992	0.158	1.46015	0.15722
1.48236	0.16418	1.36142	0.15809	1.48315	0.15731
1.50213	0.16427	1.36154	0.15831	1.48999	0.15749
1.48925	0.16436	1.36568	0.15844	1.47913	0.15758
1.50284	0.1645	1.36755	0.15861	1.49335	0.15767
1.50185	0.16459	1.38054	0.1587	1.49911	0.15785
1.50697	0.16477	1.36568	0.15884	1.48038	0.15794
1.51687	0.16486	1.36617	0.15901	1.48236	0.15808
1.50168	0.16495	1.38076	0.15914	1.50213	0.15817
1.5068	0.16513	1.38558	0.15923	1.48925	0.15826
1.5271	0.16522	1.39724	0.15945	1.50284	0.15839
1.52397	0.16535	1.38219	0.15954	1.50185	0.15848
1.51605	0.16544	1.38484	0.15972	1.50697	0.15866
1.52619	0.16553	1.38242	0.15985	1.51687	0.15875
1.51646	0.16567	1.3869	0.16002	1.50168	0.15884
1.53479	0.16576	1.40264	0.16011	1.5068	0.15902
1.54106	0.16589	1.38809	0.16025	1.5271	0.15911
1.52304	0.16598	1.40212	0.16047	1.52397	0.15924
1.52897	0.16603	1.40867	0.16051	1.51605	0.15933
1.52712	0.16621	1.40275	0.16064	1.52619	0.15942
1.53553	0.1663	1.41086	0.16086	1.51646	0.15956
1.54591	0.16643	1.39817	0.16095	1.53479	0.15965
1.52936	0.16652	1.39935	0.16113	1.54106	0.15978
1.54741	0.16661	1.41878	0.16121	1.52304	0.15987
1.53422	0.16675	1.41485	0.16135	1.52897	0.15991
1.54126	0.16684	1.41507	0.16152	1.52712	0.16009
1.55014	0.16702	1.4018	0.16161	1.53553	0.16018
1.53478	0.16706	1.41042	0.16183	1.54591	0.16032
1.55196	0.16715	1.42833	0.16192	1.52936	0.16041
1.56019	0.16733	1.4147	0.16201	1.54741	0.1605
1.55301	0.16738	1.43351	0.16223	1.53422	0.16063
1.55847	0.16756	1.41867	0.16232	1.54126	0.16072
1.54299	0.16765	1.42057	0.16249	1.55014	0.1609
1.54813	0.16778	1.43852	0.16262	1.53478	0.16095
1.56483	0.16787	1.42477	0.16271	1.55196	0.16104
1.54943	0.16796	1.43649	0.16293	1.56019	0.16121
1.55787	0.16814	1.44371	0.16298	1.55301	0.16126
1.5552	0.16819	1.4309	0.1632	1.55847	0.16144
1.57164	0.16828	1.4422	0.16329	1.54299	0.16153
1.57209	0.16846	1.42548	0.16342	1.54813	0.16166
1.55912	0.1685	1.42771	0.16359	1.56483	0.16175
1.56699	0.16864	1.44504	0.16368	1.54943	0.16184
1.56518	0.16873	1.4396	0.16381	1.55787	0.16202
1.56298	0.16886	1.44375	0.16399	1.5552	0.16207
1.57876	0.16895	1.43582	0.16408	1.57164	0.16216
1.56052	0.16904	1.43573	0.1643	1.57209	0.16234
1.57024	0.16922	1.45909	0.16439	1.55912	0.16238
1.57092	0.16927	1.44048	0.16447	1.56699	0.16252
1.57377	0.16936	1.4547	0.16469	1.56518	0.16261
1.58315	0.16954	1.45079	0.16478	1.56298	0.16274
1.56497	0.16958	1.45684	0.16496	1.57876	0.16283
1.57122	0.16976	1.47328	0.16505	1.56052	0.16292
1.59276	0.16985	1.45619	0.16518	1.57024	0.1631
1.5858	0.16999	1.45987	0.16536	1.57092	0.16314
1.58862	0.17008	1.48278	0.16544	1.57377	0.16323
1.57994	0.17017	1.48402	0.16562	1.58315	0.16341
1.58503	0.1703	1.48415	0.16575	1.56497	0.16346
1.60062	0.17039	1.47151	0.16584	1.57122	0.16364
1.59469	0.17057	1.4808	0.16602	1.59276	0.16373
1.5922	0.17062	1.4917	0.1661	1.5858	0.16386
1.58789	0.17071	1.49468	0.16628	1.58862	0.16395
1.58424	0.17089	1.47832	0.16637	1.57994	0.16404
1.60271	0.17098	1.49366	0.16646	1.58503	0.16417
1.60324	0.17111	1.49776	0.16668	1.60062	0.16426
1.5855	0.1712	1.47687	0.16677	1.59469	0.16444
1.58739	0.17138	1.48055	0.16694	1.5922	0.16449
1.60116	0.17147	1.50032	0.16703	1.58789	0.16458
1.60722	0.17152	1.48377	0.16712	1.58424	0.16476
1.61088	0.1717	1.48788	0.16729	1.60271	0.16485
1.58954	0.17179	1.50708	0.16738	1.60324	0.16498
1.59487	0.17192	1.50009	0.16751	1.5855	0.16507
1.61206	0.17201	1.50834	0.16769	1.58739	0.16525
1.59517	0.1721	1.49747	0.16778	1.60116	0.16534
1.60589	0.17224	1.49769	0.16795	1.60722	0.16539
1.60405	0.17233	1.51293	0.16804	1.61088	0.16557
1.61022	0.17251	1.51508	0.16822	1.58954	0.16565
1.61431	0.1726	1.49952	0.16831	1.59487	0.16579
1.60276	0.17269	1.52195	0.16844	1.61206	0.16588
1.59967	0.17286	1.51451	0.16861	1.59517	0.16597
1.62094	0.17295	1.50165	0.1687	1.60589	0.1661
1.62654	0.17309	1.51752	0.16879	1.60405	0.16619
1.60996	0.17318	1.50969	0.16901	1.61022	0.16637
1.63292	0.17327	1.51544	0.1691	1.61431	0.16646
1.62484	0.17341	1.51682	0.16928	1.60276	0.16655
1.63017	0.1735	1.50777	0.16936	1.59967	0.16673
1.63211	0.17367	1.52148	0.16945	1.62094	0.16682
1.62573	0.17376	1.52861	0.16963	1.62654	0.16696
1.63775	0.17381	1.51181	0.16976	1.60996	0.16704
1.64107	0.17399	1.51538	0.16994	1.63292	0.16713
1.62614	0.17408	1.52223	0.17007	1.62484	0.16727
1.62852	0.17426	1.5141	0.17011	1.63017	0.16736
1.64098	0.17435	1.52936	0.17033	1.63211	0.16754
1.62769	0.17448	1.52086	0.17042	1.62573	0.16763
1.64511	0.17457	1.52166	0.1706	1.63775	0.16767
1.62945	0.17466	1.53697	0.17069	1.64107	0.16785
1.63245	0.17484	1.52293	0.17082	1.62614	0.16794
1.64879	0.17489	1.51819	0.17099	1.62852	0.16812
1.63213	0.17498	1.54248	0.17108	1.64098	0.16821
1.63894	0.17516	1.5424	0.17126	1.62769	0.16834
1.65243	0.17525	1.54179	0.17139	1.64511	0.16843
1.65209	0.17543	1.53488	0.17148	1.62945	0.16852
1.64363	0.17552	1.53821	0.17165	1.63245	0.1687
1.66436	0.17565	1.55575	0.17174	1.64879	0.16875
1.6453	0.17574	1.53472	0.17188	1.63213	0.16884
1.66843	0.17583	1.54211	0.17201	1.63894	0.16902
1.6679	0.17601	1.56276	0.17214	1.65243	0.16911
1.65052	0.17606	1.56602	0.17232	1.65209	0.16929
1.66506	0.17615	1.55436	0.1724	1.64363	0.16938
1.66684	0.17633	1.57004	0.17249	1.66436	0.16951
1.65176	0.17642	1.57001	0.17267	1.6453	0.1696
1.66348	0.1766	1.56962	0.1728	1.66843	0.16969
1.67227	0.17669	1.56215	0.17293	1.6679	0.16987
1.66197	0.17678	1.56493	0.17306	1.65052	0.16991
1.67546	0.17691	1.57693	0.17315	1.66506	0.17
1.65936	0.177	1.58339	0.17333	1.66684	0.17018
1.6661	0.17718	1.57167	0.17342	1.65176	0.17027
1.68696	0.17727	1.57591	0.17359	1.66348	0.17045
1.6687	0.17732	1.59121	0.17368	1.67227	0.17054
1.66386	0.1775	1.57334	0.17377	1.66197	0.17063
1.68684	0.17759	1.5785	0.17395	1.67546	0.17077
1.68	0.17777	1.59702	0.17403	1.65936	0.17086
1.6755	0.17786	1.59548	0.17421	1.6661	0.17104
1.68265	0.17795	1.57976	0.1743	1.68696	0.17113
1.67503	0.17808	1.59886	0.17439	1.6687	0.17117
1.69652	0.17817	1.60175	0.17461	1.66386	0.17135
1.69852	0.17835	1.58265	0.17465	1.68684	0.17144
1.68284	0.17844	1.58381	0.17483	1.68	0.17162
1.6987	0.17849	1.5979	0.17496	1.6755	0.17171
1.69461	0.17867	1.57973	0.17505	1.68265	0.1718
1.67678	0.17876	1.58863	0.17522	1.67503	0.17193
1.68006	0.17894	1.6067	0.17531	1.69652	0.17202
1.69744	0.17903	1.58995	0.1754	1.69852	0.1722
1.68501	0.17912	1.59539	0.17558	1.68284	0.17229
1.70061	0.17925	1.61297	0.17566	1.6987	0.17234
1.6962	0.17934	1.61244	0.17584	1.69461	0.17252
1.69828	0.17952	1.60717	0.17597	1.67678	0.1726
1.69878	0.17966	1.60002	0.1761	1.68006	0.17278
1.69213	0.1797	1.6169	0.17619	1.69744	0.17287
1.69419	0.17988	1.6161	0.17632	1.68501	0.17296
1.71369	0.17997	1.61168	0.17646	1.70061	0.1731
1.71552	0.18011	1.62613	0.17654	1.6962	0.17319
1.69743	0.1802	1.62297	0.17668	1.69828	0.17337
1.71763	0.18033	1.62707	0.17685	1.69878	0.1735
1.72083	0.18051	1.62594	0.1769	1.69213	0.17355
1.70831	0.18056	1.61652	0.17712	1.69419	0.17373
1.71352	0.18074	1.63535	0.17721	1.71369	0.17382
1.73079	0.18083	1.6203	0.17729	1.71552	0.17395
1.71856	0.18092	1.62798	0.17747	1.69743	0.17404
1.73108	0.18105	1.64464	0.17756	1.71763	0.17417
1.72944	0.18114	1.64709	0.17773	1.72083	0.17435
1.73571	0.18123	1.63721	0.17782	1.70831	0.1744
1.74248	0.18141	1.64228	0.17791	1.71352	0.17458
1.73066	0.18146	1.64808	0.17809	1.73079	0.17467
1.73113	0.18164	1.63368	0.17817	1.71856	0.17476
1.75055	0.18173	1.64192	0.17835	1.73108	0.17489
1.74373	0.18191	1.64871	0.17844	1.72944	0.17498
1.73926	0.182	1.63507	0.17853	1.73571	0.17507
1.74278	0.18204	1.63485	0.1787	1.74248	0.17525
1.7374	0.18222	1.64545	0.17879	1.73066	0.1753
1.75288	0.18231	1.63273	0.17888	1.73113	0.17547
1.73703	0.1824	1.63487	0.17906	1.75055	0.17556
1.74256	0.18254	1.654	0.17914	1.74373	0.17574
1.76175	0.18263	1.66089	0.17932	1.73926	0.17583
1.76664	0.18281	1.64607	0.17941	1.74278	0.17588
1.76255	0.18285	1.64881	0.17958	1.7374	0.17606
1.76571	0.18303	1.66507	0.17967	1.75288	0.17615
1.75236	0.18312	1.65078	0.17976	1.73703	0.17624
1.76982	0.18317	1.65783	0.17998	1.74256	0.17637
1.76906	0.18335	1.67459	0.18002	1.76175	0.17646
1.75191	0.18344	1.66516	0.18011	1.76664	0.17664
1.76236	0.18357	1.6658	0.18029	1.76255	0.17669
1.75726	0.18366	1.68633	0.18038	1.76571	0.17687
1.76042	0.18375	1.68913	0.18055	1.75236	0.17696
1.76917	0.18393	1.67422	0.18064	1.76982	0.177
1.75234	0.18402	1.68699	0.18073	1.76906	0.17718
1.75146	0.1842	1.69342	0.18091	1.75191	0.17727
1.77409	0.18429	1.68484	0.18099	1.76236	0.1774
1.75504	0.18434	1.69146	0.18117	1.75726	0.17749
1.75661	0.18452	1.70399	0.18126	1.76042	0.17758
1.77485	0.18461	1.7075	0.1813	1.76917	0.17776
1.77462	0.18479	1.70685	0.18148	1.75234	0.17785
1.7609	0.18488	1.68933	0.18157	1.75146	0.17803
1.78358	0.18497	1.7094	0.18165	1.77409	0.17812
1.77829	0.1851	1.70792	0.18179	1.75504	0.17817
1.78268	0.18519	1.69337	0.18188	1.75661	0.17834
1.78515	0.18537	1.70306	0.18205	1.77485	0.17843
1.78159	0.18546	1.72188	0.18214	1.77462	0.17861
1.79088	0.18555	1.72201	0.18232	1.7609	0.1787
1.79591	0.18573	1.70706	0.1824	1.78358	0.17879
1.7793	0.18582	1.71969	0.18249	1.77829	0.17893
1.77874	0.18596	1.70615	0.18262	1.78268	0.17902
1.79482	0.18605	1.72143	0.18271	1.78515	0.1792
1.77981	0.18614	1.70534	0.1828	1.78159	0.17929
1.78813	0.18632	1.70783	0.18293	1.79088	0.17938
1.80338	0.18641	1.72726	0.18302	1.79591	0.17956
1.81111	0.18659	1.73725	0.1832	1.7793	0.17965
1.81383	0.18663	1.71892	0.18329	1.77874	0.17978
1.79476	0.18672	1.73349	0.18337	1.79482	0.17987
1.79439	0.1869	1.73712	0.18355	1.77981	0.17996
1.81131	0.18695	1.72891	0.18364	1.78813	0.18014
1.81282	0.18713	1.74305	0.18377	1.80338	0.18023
1.79707	0.18722	1.72604	0.18386	1.81111	0.18041
1.8005	0.1874	1.74876	0.18395	1.81383	0.18045
1.81344	0.18748	1.74798	0.18412	1.79476	0.18054
1.80121	0.18757	1.7333	0.18421	1.79439	0.18072
1.82436	0.18771	1.73829	0.18434	1.81131	0.18077
1.80306	0.1878	1.75298	0.18443	1.81282	0.18095
1.80654	0.18798	1.74012	0.18452	1.79707	0.18104
1.82553	0.18807	1.76574	0.18465	1.8005	0.18122
1.80823	0.18816	1.74751	0.18474	1.81344	0.1813
1.81113	0.18834	1.76658	0.18483	1.80121	0.18139
1.82824	0.18843	1.76442	0.185	1.82436	0.18153
1.82949	0.18856	1.74725	0.18505	1.80306	0.18162
1.81801	0.18865	1.74576	0.18522	1.80654	0.1818
1.8352	0.18874	1.76294	0.18531	1.82553	0.18189
1.83171	0.18892	1.75035	0.18544	1.80823	0.18198
1.8214	0.18901	1.77024	0.18553	1.81113	0.18216
1.82562	0.18919	1.75056	0.18562	1.82824	0.18225
1.82439	0.18924	1.74696	0.1858	1.82949	0.18238
1.84738	0.18933	1.76153	0.18584	1.81801	0.18247
1.84287	0.18951	1.7436	0.18593	1.8352	0.18256
1.82501	0.18955	1.74904	0.1861	1.83171	0.18274
1.82634	0.18973	1.76757	0.18619	1.8214	0.18283
1.84724	0.18987	1.76333	0.18637	1.82562	0.18301
1.8315	0.18996	1.75059	0.18646	1.82439	0.18305
1.83704	0.19009	1.762	0.18654	1.84738	0.18314
1.85531	0.19018	1.76856	0.18672	1.84287	0.18332
1.85429	0.19036	1.77041	0.18676	1.82501	0.18337
1.83578	0.19045	1.76741	0.18685	1.82634	0.18355
1.84197	0.1905	1.77921	0.18707	1.84724	0.18368
1.8528	0.19072	1.77459	0.18716	1.8315	0.18377
1.84344	0.19081	1.78991	0.18729	1.83704	0.18391
1.86512	0.19095	1.77453	0.18738	1.85531	0.184
1.85526	0.19104	1.79662	0.18747	1.85429	0.18417
1.86866	0.19113	1.80195	0.18765	1.83578	0.18426
1.8748	0.19126	1.78553	0.18773	1.84197	0.18431
1.86041	0.19135	1.79231	0.18787	1.8528	0.18453
1.86104	0.19153	1.80705	0.18795	1.84344	0.18462
1.87573	0.19162	1.79331	0.18804	1.86512	0.18476
1.86605	0.19171	1.80582	0.18817	1.85526	0.18485
1.8769	0.19189	1.79113	0.18826	1.86866	0.18494
1.87217	0.19194	1.81055	0.18835	1.8748	0.18507
1.8719	0.19212	1.80894	0.18853	1.86041	0.18516
1.89118	0.19221	1.79427	0.18857	1.86104	0.18534
1.89252	0.19234	1.79715	0.18875	1.87573	0.18543
1.87921	0.19243	1.81163	0.18884	1.86605	0.18552
1.89825	0.19252	1.80009	0.18892	1.8769	0.1857
1.88465	0.19266	1.82379	0.18906	1.87217	0.18574
1.90271	0.19275	1.81143	0.18914	1.8719	0.18592
1.88711	0.19284	1.81715	0.18928	1.89118	0.18601
1.88525	0.19302	1.83371	0.18936	1.89252	0.18615
1.90371	0.19306	1.8204	0.18945	1.87921	0.18624
1.90744	0.19324	1.82444	0.18963	1.89825	0.18633
1.89625	0.19333	1.81755	0.18967	1.88465	0.18646
1.91787	0.19347	1.8195	0.1898	1.90271	0.18655
1.89743	0.19356	1.83599	0.18989	1.88711	0.18664
1.91943	0.19365	1.83219	0.19003	1.88525	0.18682
1.91668	0.19378	1.83908	0.19011	1.90371	0.18687
1.90479	0.19387	1.8322	0.1902	1.90744	0.18704
1.9208	0.19401	1.83515	0.19033	1.89625	0.18713
1.90318	0.1941	1.85134	0.19042	1.91787	0.18727
1.92203	0.19419	1.83981	0.19051	1.89743	0.18736
1.92683	0.19432	1.84452	0.19069	1.91943	0.18745
1.90865	0.19441	1.84103	0.19073	1.91668	0.18758
1.91935	0.19459	1.84821	0.19086	1.90479	0.18767
1.9201	0.19464	1.87138	0.19095	1.9208	0.18781
1.93102	0.19473	1.85381	0.19104	1.90318	0.1879
1.92963	0.19491	1.87171	0.19117	1.92203	0.18799
1.91087	0.19495	1.85264	0.19126	1.92683	0.18812
1.91803	0.19513	1.85848	0.19139	1.90865	0.18821
1.92628	0.19522	1.86446	0.19143	1.91935	0.18839
1.92339	0.19531	1.86936	0.19152	1.9201	0.18843
1.9371	0.19545	1.88022	0.1917	1.93102	0.18852
1.92143	0.19554	1.85977	0.19174	1.92963	0.1887
1.92548	0.19567	1.87646	0.19187	1.91087	0.18875
1.9462	0.19581	1.87092	0.19196	1.91803	0.18893
1.92837	0.19585	1.88352	0.19205	1.92628	0.18902
1.93197	0.19603	1.8778	0.19218	1.92339	0.18911
1.93985	0.19612	1.87062	0.19223	1.9371	0.18924
1.92992	0.19626	1.87361	0.1924	1.92143	0.18933
1.95059	0.19635	1.86169	0.19249	1.92548	0.18947
1.93308	0.19644	1.87844	0.19254	1.9462	0.1896
1.93917	0.19657	1.88376	0.19271	1.92837	0.18965
1.9589	0.19666	1.87049	0.1928	1.93197	0.18983
1.95559	0.19684	1.88722	0.19293	1.93985	0.18991
1.96061	0.19689	1.86772	0.19302	1.92992	0.19005
1.94251	0.19698	1.889	0.19311	1.95059	0.19014
1.94678	0.19716	1.89052	0.19324	1.93308	0.19023
1.96346	0.19725	1.88096	0.19333	1.93917	0.19036
1.96287	0.19738	1.8827	0.19337	1.9589	0.19045
1.94945	0.19747	1.88003	0.19355	1.95559	0.19063
1.97262	0.19761	1.89571	0.19364	1.96061	0.19068
1.95298	0.1977	1.90365	0.19377	1.94251	0.19077
1.97338	0.19779	1.8855	0.19386	1.94678	0.19095
1.9765	0.19792	1.90186	0.19395	1.96346	0.19104
1.95702	0.19801	1.89775	0.19408	1.96287	0.19117
1.9635	0.19819	1.90852	0.19417	1.94945	0.19126
1.96214	0.19824	1.90908	0.1943	1.97262	0.19139
1.98278	0.19833	1.8982	0.19439	1.95298	0.19148
1.9873	0.19851	1.91373	0.19447	1.97338	0.19157
1.97431	0.19855	1.90444	0.19461	1.9765	0.19171
1.98011	0.19873	1.92766	0.19469	1.95702	0.1918
1.98399	0.19878	1.91283	0.19474	1.9635	0.19198
1.98145	0.19896	1.90803	0.19491	1.96214	0.19202
1.99825	0.199	1.91136	0.19496	1.98278	0.19211
1.9873	0.19909	1.90381	0.19514	1.9873	0.19229
1.99961	0.19923	1.92412	0.19518	1.97431	0.19234
1.99623	0.19932	1.9102	0.19527	1.98011	0.19252
2.00864	0.19941	1.92581	0.1954	1.98399	0.19256
2.0091	0.19954	1.92006	0.19549	1.98145	0.19274
1.9946	0.19963	1.94085	0.19558	1.99825	0.19278
2.00225	0.19977	1.94228	0.19571	1.9873	0.19287
2.0014	0.19986	1.93419	0.19575	1.99961	0.19301
1.99424	0.19999	1.93871	0.19593	1.99623	0.1931
2.01622	0.20008	1.91985	0.19602	2.00864	0.19319
1.99571	0.20017	1.91937	0.19615	2.0091	0.19332
2.01541	0.20031	1.93628	0.19624	1.9946	0.19341
1.99819	0.2004	1.93512	0.19628	2.00225	0.19355
2.00048	0.20058	1.94738	0.19641	2.0014	0.19364
2.02001	0.20062	1.93257	0.1965	1.99424	0.19377
2.00641	0.20071	1.94978	0.19659	2.01622	0.19386
2.01377	0.20085	1.95114	0.19676	1.99571	0.19395
2.00996	0.20094	1.94789	0.19681	2.01541	0.19409
2.00175	0.20107	1.956	0.19694	1.99819	0.19417
2.02152	0.20116	1.93922	0.19703	2.00048	0.19435
2.00468	0.20125	1.95964	0.19712	2.02001	0.1944
2.0138	0.20143	1.94389	0.19725	2.00641	0.19449
2.01329	0.20147	1.96649	0.19734	2.01377	0.19462
2.00912	0.20166	1.97204	0.19747	2.00996	0.19471
2.02349	0.20175	1.95836	0.19756	2.00175	0.19485
2.00852	0.20179	1.96946	0.19765	2.02152	0.19494
2.00963	0.20197	1.95607	0.19773	2.00468	0.19503
2.02869	0.20206	1.97108	0.19782	2.0138	0.19521
2.03047	0.20224	1.95353	0.19791	2.01329	0.19525
2.03036	0.20228	1.97678	0.19804	2.00912	0.19543
2.02159	0.20237	1.9595	0.19813	2.02349	0.19552
2.02464	0.20251	1.96378	0.19826	2.00852	0.19556
2.04543	0.2026	1.9828	0.19835	2.00963	0.19574
2.03548	0.20273	1.98287	0.1984	2.02869	0.19583
2.04005	0.20282	1.99263	0.19857	2.03047	0.19601
2.0495	0.203	1.97427	0.19862	2.03036	0.19606
2.03117	0.20305	1.98479	0.19875	2.02159	0.19615
2.04911	0.20314	1.97114	0.19884	2.02464	0.19628
2.0473	0.20336	1.99182	0.19892	2.04543	0.19637
2.05803	0.20354	1.99761	0.19906	2.03548	0.19651
2.04484	0.20359	1.99136	0.1991	2.04005	0.1966
2.04897	0.20377	2.00214	0.19928	2.0495	0.19678
2.05794	0.20381	1.99177	0.19932	2.03117	0.19682
2.05455	0.20399	2.0027	0.19936	2.04911	0.19691
2.07478	0.20408	1.99928	0.19954	2.0473	0.19713
2.0765	0.20422	2.01978	0.19958	2.05803	0.19731
2.06828	0.20426	2.0067	0.19972	2.04484	0.19736
2.07962	0.20444	2.01835	0.1998	2.04897	0.19754
2.0632	0.20449	1.9955	0.19985	2.05794	0.19758
2.07381	0.20467	1.99839	0.20003	2.05455	0.19776
2.07187	0.20471	1.99617	0.20007	2.07478	0.19785
2.0665	0.20485	2.00996	0.2002	2.0765	0.19799
2.08298	0.20494	2.02935	0.20029	2.06828	0.19803
2.07716	0.20503	2.02458	0.20033	2.07962	0.19821
2.09029	0.20516	2.03692	0.20047	2.0632	0.19826
2.07484	0.20521	2.01317	0.20055	2.07381	0.19843
2.0791	0.20539	2.01996	0.2006	2.07187	0.19848
2.08375	0.20543	2.00932	0.20073	2.0665	0.19861
2.07687	0.20557	2.02747	0.20082	2.08298	0.1987
2.09911	0.20566	2.02445	0.20095	2.07716	0.19879
2.08265	0.20579	2.03976	0.20104	2.09029	0.19893
2.09897	0.20588	2.03348	0.20113	2.07484	0.19897
2.10466	0.20602	2.03964	0.20121	2.0791	0.19915
2.08583	0.20611	2.03105	0.2013	2.08375	0.1992
2.10924	0.20624	2.0435	0.20139	2.07687	0.19933
2.09243	0.20629	2.03678	0.20148	2.09911	0.19942
2.10392	0.20642	2.04523	0.20157	2.08265	0.19956
2.09697	0.20651	2.04434	0.2017	2.09897	0.19965
2.11447	0.2066	2.03801	0.20174	2.10466	0.19978
2.1175	0.20674	2.04742	0.20187	2.08583	0.19987
2.11304	0.20678	2.03173	0.20196	2.10924	0.2
2.12508	0.20696	2.05398	0.2021	2.09243	0.20005
2.11367	0.20705	2.03498	0.20214	2.10392	0.20018
2.11777	0.20714	2.0544	0.20223	2.09697	0.20027
2.10941	0.20723	2.04965	0.20236	2.11447	0.20036
2.11233	0.20737	2.05805	0.2024	2.1175	0.2005
2.11878	0.20741	2.04766	0.20254	2.11304	0.20054
2.11222	0.20759	2.0506	0.20262	2.12508	0.20072
2.13122	0.20768	2.056	0.20276	2.11367	0.20081
2.12038	0.20777	2.04421	0.20284	2.11777	0.2009
2.12954	0.20786	2.05197	0.20289	2.10941	0.20099
2.13726	0.208	2.04727	0.20306	2.11233	0.20113
2.12424	0.20809	2.06527	0.20311	2.11878	0.20117
2.1399	0.20822	2.06087	0.20324	2.11222	0.20135
2.12721	0.20831	2.07477	0.20333	2.13122	0.20144
2.14879	0.20836	2.06164	0.20342	2.12038	0.20153
2.14492	0.20854	2.06447	0.20351	2.12954	0.20162
2.14429	0.20858	2.05389	0.20359	2.13726	0.20175
2.14967	0.20872	2.05116	0.20373	2.12424	0.20184
2.13726	0.20881	2.06233	0.20377	2.1399	0.20198
2.14897	0.20894	2.0694	0.20386	2.12721	0.20207
2.13854	0.20899	2.08531	0.20403	2.14879	0.20211
2.14744	0.20917	2.06797	0.20408	2.14492	0.20229
2.15271	0.20921	2.08799	0.20421	2.14429	0.20234
2.14411	0.20935	2.06775	0.20425	2.14967	0.20247
2.16197	0.20944	2.06918	0.20443	2.13726	0.20256
2.1572	0.20948	2.07488	0.20447	2.14897	0.20269
2.16581	0.20962	2.08587	0.20452	2.13854	0.20274
2.14968	0.20971	2.08543	0.20469	2.14744	0.20292
2.16316	0.20984	2.0772	0.20478	2.15271	0.20296
2.15288	0.20989	2.09499	0.20491	2.14411	0.2031
2.16206	0.21007	2.0784	0.20496	2.16197	0.20319
2.1651	0.21011	2.09111	0.20509	2.1572	0.20323
2.15834	0.21025	2.08527	0.20518	2.16581	0.20337
2.1705	0.21034	2.09585	0.20527	2.14968	0.20346
2.15996	0.21047	2.09035	0.20536	2.16316	0.20359
2.17543	0.21052	2.09615	0.20544	2.15288	0.20364
2.17823	0.2107	2.09924	0.20558	2.16206	0.20382
2.17487	0.21074	2.07758	0.20566	2.1651	0.20386
2.18642	0.21088	2.08385	0.20571	2.15834	0.204
2.17466	0.21097	2.07892	0.20588	2.1705	0.20409
2.18055	0.21101	2.10524	0.20597	2.15996	0.20422
2.17585	0.21119	2.08641	0.20602	2.17543	0.20426
2.19549	0.21124	2.09878	0.20615	2.17823	0.20444
2.18167	0.21137	2.09401	0.20624	2.17487	0.20449
2.19683	0.21146	2.08821	0.20637	2.18642	0.20462
2.19215	0.2116	2.11028	0.20646	2.17466	0.20471
2.18898	0.21164	2.10729	0.20659	2.18055	0.20476
2.19614	0.21182	2.12506	0.20668	2.17585	0.20494
2.17897	0.21187	2.12943	0.20681	2.19549	0.20498
2.19023	0.212	2.11931	0.2069	2.18167	0.20512
2.18108	0.21209	2.13121	0.20699	2.19683	0.20521
2.1828	0.21223	2.11676	0.20707	2.19215	0.20534
2.19192	0.21227	2.12367	0.20716	2.18898	0.20539
2.18524	0.21241	2.11262	0.20729	2.19614	0.20556
2.20687	0.2125	2.13208	0.20734	2.17897	0.20561
2.19715	0.21263	2.12735	0.20747	2.19023	0.20574
2.20292	0.21272	2.14514	0.20756	2.18108	0.20583
2.19183	0.21277	2.14098	0.20765	2.1828	0.20597
2.19501	0.21295	2.1471	0.20773	2.19192	0.20601
2.21599	0.21304	2.1395	0.20782	2.18524	0.20615
2.19819	0.21313	2.14556	0.20795	2.20687	0.20624
2.21773	0.21322	2.1438	0.208	2.19715	0.20637
2.21209	0.21335	2.14146	0.20813	2.20292	0.20646
2.21797	0.21344	2.14654	0.20817	2.19183	0.20651
2.22549	0.21358	2.13828	0.20831	2.19501	0.20669
2.21182	0.21367	2.15446	0.20839	2.21599	0.20678
2.23073	0.21376	2.15354	0.20844	2.19819	0.20687
2.21768	0.21385	2.16667	0.20857	2.21773	0.20695
2.22968	0.21394	2.16174	0.20862	2.21209	0.20709
2.22222	0.21407	2.17566	0.20879	2.21797	0.20718
2.2347	0.21412	2.16061	0.20884	2.22549	0.20731
2.23169	0.2143	2.17481	0.20892	2.21182	0.2074
2.23304	0.21434	2.16059	0.20901	2.23073	0.20749
2.24578	0.21448	2.17878	0.2091	2.21768	0.20758
2.2333	0.21457	2.1574	0.20919	2.22968	0.20767
2.24828	0.2147	2.17392	0.20928	2.22222	0.20781
2.23428	0.21475	2.16658	0.20941	2.2347	0.20785
2.24815	0.21484	2.17958	0.2095	2.23169	0.20803
2.25419	0.21506	2.16592	0.20954	2.23304	0.20808
2.24873	0.21515	2.18499	0.20967	2.24578	0.20821
2.26385	0.21524	2.17255	0.20972	2.2333	0.2083
2.25814	0.21538	2.18954	0.20985	2.24828	0.20843
2.25259	0.21542	2.17677	0.20989	2.23428	0.20848
2.26017	0.21556	2.18816	0.21003	2.24815	0.20857
2.24469	0.21565	2.1854	0.21011	2.25419	0.20879
2.26229	0.21578	2.19061	0.2102	2.24873	0.20888
2.24478	0.21583	2.18591	0.21029	2.26385	0.20897
2.25259	0.216	2.19946	0.21033	2.25814	0.20911
2.25282	0.21605	2.18567	0.21047	2.25259	0.20915
2.25526	0.21618	2.20007	0.21051	2.26017	0.20929
2.27596	0.21628	2.19734	0.21069	2.24469	0.20938
2.26037	0.21637	2.1949	0.21073	2.26229	0.20951
2.27611	0.21646	2.20334	0.21086	2.24478	0.20956
2.27124	0.21659	2.19523	0.21091	2.25259	0.20973
2.27955	0.21664	2.1933	0.21099	2.25282	0.20978
2.28271	0.21681	2.18965	0.21113	2.25526	0.20991
2.27745	0.21686	2.19277	0.21117	2.27596	0.21
2.26704	0.2169	2.19048	0.2113	2.26037	0.21009
2.27101	0.21708	2.20996	0.21139	2.27611	0.21018
2.27466	0.21713	2.19536	0.21152	2.27124	0.21032
2.2721	0.21726	2.20705	0.21161	2.27955	0.21036
2.28845	0.21735	2.18792	0.21166	2.28271	0.21054
2.28104	0.21749	2.19574	0.21179	2.27745	0.21059
2.29735	0.21753	2.17982	0.21187	2.26704	0.21063
2.28961	0.21767	2.20265	0.21196	2.27101	0.21081
2.29617	0.21776	2.20813	0.2121	2.27466	0.21086
2.30252	0.21789	2.20343	0.21214	2.2721	0.21099
2.29643	0.21794	2.21607	0.21232	2.28845	0.21108
2.28675	0.21803	2.20158	0.2124	2.28104	0.21122
2.29307	0.21816	2.21475	0.21249	2.29735	0.21126
2.29753	0.21821	2.21177	0.21258	2.28961	0.21139
2.29079	0.21834	2.22588	0.21267	2.29617	0.21148
2.30781	0.21848	2.22086	0.2128	2.30252	0.21162
2.2926	0.21852	2.21279	0.21284	2.29643	0.21166
2.31423	0.21861	2.21941	0.21298	2.28675	0.21175
2.29931	0.21875	2.20664	0.21306	2.29307	0.21189
2.31595	0.21879	2.22617	0.2132	2.29753	0.21193
2.31274	0.21897	2.21388	0.21328	2.29079	0.21207
2.31265	0.21902	2.23372	0.21333	2.30781	0.2122
2.32163	0.21915	2.23292	0.21346	2.2926	0.21225
2.31545	0.2192	2.24358	0.21355	2.31423	0.21234
2.32712	0.21938	2.24126	0.21368	2.29931	0.21247
2.30843	0.21942	2.23559	0.21373	2.31595	0.21252
2.32917	0.21956	2.24346	0.21386	2.31274	0.21269
2.31215	0.2196	2.22628	0.21395	2.31265	0.21274
2.32855	0.21974	2.2409	0.21403	2.32163	0.21287
2.31782	0.21983	2.23446	0.21417	2.31545	0.21292
2.33	0.21992	2.24886	0.21421	2.32712	0.2131
2.32032	0.22001	2.24808	0.21434	2.30843	0.21314
2.32213	0.22014	2.25203	0.21443	2.32917	0.21328
2.33648	0.22023	2.25635	0.21456	2.31215	0.21332
2.32599	0.22032	2.25212	0.21461	2.32855	0.21346
2.34391	0.22041	2.25073	0.21469	2.31782	0.21355
2.32801	0.2205	2.2499	0.21483	2.33	0.21364
2.34889	0.22059	2.25735	0.21487	2.32032	0.21373
2.3388	0.22073	2.24741	0.21505	2.32213	0.21386
2.3511	0.22077	2.26444	0.21509	2.33648	0.21395
2.34797	0.22095	2.24678	0.21522	2.32599	0.21404
2.34325	0.221	2.26166	0.21531	2.34391	0.21413
2.35107	0.22113	2.24414	0.21536	2.32801	0.21422
2.3465	0.22118	2.24883	0.21553	2.34889	0.21431
2.34296	0.22127	2.24918	0.21558	2.3388	0.21444
2.33925	0.2214	2.25394	0.21571	2.3511	0.21449
2.36369	0.22154	2.27332	0.2158	2.34797	0.21467
2.34424	0.22163	2.25284	0.21593	2.34325	0.21471
2.36247	0.22167	2.27187	0.21597	2.35107	0.21485
2.35205	0.22181	2.25405	0.21606	2.3465	0.21489
2.36392	0.2219	2.26065	0.21619	2.34296	0.21498
2.35339	0.22199	2.25254	0.21628	2.33925	0.21512
2.36173	0.22208	2.25399	0.21641	2.36369	0.21525
2.36554	0.22221	2.27081	0.2165	2.34424	0.21534
2.34819	0.2223	2.26438	0.21659	2.36247	0.21539
2.37065	0.22244	2.2752	0.21668	2.35205	0.21552
2.35466	0.22248	2.26284	0.21676	2.36392	0.21561
2.36811	0.22262	2.27864	0.2169	2.35339	0.2157
2.35716	0.22271	2.28018	0.21699	2.36173	0.21579
2.3771	0.22275	2.27485	0.21712	2.36554	0.21592
2.37175	0.22293	2.29072	0.21721	2.34819	0.21601
2.38009	0.22298	2.28526	0.21734	2.37065	0.21615
2.38776	0.22311	2.29489	0.21743	2.35466	0.21619
2.37189	0.2232	2.28022	0.21747	2.36811	0.21633
2.38767	0.22329	2.29563	0.2176	2.35716	0.21642
2.37578	0.22338	2.28624	0.21769	2.3771	0.21646
2.39248	0.22352	2.29672	0.21782	2.37175	0.21664
2.37673	0.22356	2.30614	0.21787	2.38009	0.21669
[truncated: 9,058 more rows]

## Sheet: 15-20mm，Stress-Strain 
Stress	SP5-10(3)	Stress	SP5-10(5)	Stress	SP5-10(7)
0	0	0	0	0	0
0.10033	0.0284	0.10033	0.01689	0.10097	0.0172
0.10028	0.0284	0.10028	0.01689	0.10124	0.0172
0.10054	0.02845	0.10054	0.01693	0.10031	0.0172
0.09963	0.02845	0.09963	0.01693	0.10141	0.0172
0.09977	0.02845	0.09977	0.01693	0.10017	0.0172
0.09926	0.02845	0.09926	0.01693	0.09903	0.01725
0.09871	0.0285	0.09871	0.01698	0.10033	0.01725
0.09903	0.0285	0.09903	0.01698	0.10166	0.01725
0.09976	0.0285	0.09976	0.01698	0.1009	0.01725
0.0987	0.0285	0.0987	0.01698	0.10161	0.01725
0.09982	0.0285	0.09982	0.01698	0.10087	0.01729
0.10023	0.0285	0.10023	0.01698	0.10083	0.01729
0.09894	0.02854	0.09894	0.01702	0.10071	0.01729
0.0988	0.02854	0.0988	0.01702	0.10127	0.01729
0.09889	0.02854	0.09889	0.01702	0.10192	0.01729
0.09917	0.02854	0.09917	0.01702	0.10157	0.01734
0.0999	0.02854	0.0999	0.01702	0.1028	0.01734
0.09866	0.02859	0.09866	0.01707	0.10306	0.01734
0.09972	0.02859	0.09972	0.01707	0.10122	0.01734
0.09926	0.02859	0.09926	0.01707	0.10169	0.01734
0.10134	0.02859	0.10134	0.01707	0.10237	0.01739
0.10117	0.02863	0.10117	0.01712	0.10154	0.01739
0.09996	0.02863	0.09996	0.01712	0.10169	0.01739
0.10101	0.02863	0.10101	0.01712	0.10154	0.01739
0.10168	0.02863	0.10168	0.01712	0.10032	0.01739
0.10233	0.02863	0.10233	0.01712	0.10065	0.01743
0.10127	0.02868	0.10127	0.01716	0.10065	0.01743
0.10201	0.02868	0.10201	0.01716	0.10152	0.01743
0.10166	0.02868	0.10166	0.01716	0.10045	0.01743
0.10237	0.02868	0.10237	0.01716	0.10106	0.01743
0.10178	0.02868	0.10178	0.01716	0.10145	0.01748
0.10279	0.02872	0.10279	0.01721	0.10237	0.01748
0.10269	0.02872	0.10269	0.01721	0.10164	0.01748
0.10325	0.02872	0.10325	0.01721	0.10155	0.01748
0.10242	0.02872	0.10242	0.01721	0.10205	0.01752
0.10417	0.02872	0.10417	0.01721	0.1018	0.01752
0.10324	0.02877	0.10324	0.01725	0.1018	0.01752
0.10413	0.02877	0.10413	0.01725	0.10154	0.01752
0.10494	0.02877	0.10494	0.01725	0.10169	0.01752
0.10468	0.02877	0.10468	0.01725	0.10178	0.01757
0.10503	0.02877	0.10503	0.01725	0.10302	0.01757
0.10608	0.02882	0.10608	0.0173	0.10215	0.01757
0.10567	0.02882	0.10567	0.0173	0.1021	0.01757
0.10558	0.02882	0.10558	0.0173	0.10242	0.01757
0.1038	0.02882	0.1038	0.0173	0.10111	0.01761
0.10613	0.02882	0.10613	0.0173	0.10233	0.01761
0.10539	0.02886	0.10539	0.01734	0.10339	0.01761
0.10581	0.02886	0.10581	0.01734	0.10293	0.01761
0.1053	0.02886	0.1053	0.01734	0.10376	0.01761
0.1048	0.02886	0.1048	0.01734	0.10201	0.01766
0.10408	0.02891	0.10408	0.01739	0.10157	0.01766
0.10434	0.02891	0.10434	0.01739	0.10178	0.01766
0.10535	0.02891	0.10535	0.01739	0.10143	0.01766
0.10567	0.02891	0.10567	0.01739	0.10134	0.01766
0.1052	0.02891	0.1052	0.01739	0.10376	0.01771
0.10631	0.02895	0.10631	0.01744	0.10215	0.01771
0.10452	0.02895	0.10452	0.01744	0.1021	0.01771
0.10549	0.02895	0.10549	0.01744	0.10293	0.01771
0.10461	0.02895	0.10461	0.01744	0.10247	0.01775
0.10466	0.02895	0.10466	0.01744	0.10296	0.01775
0.10613	0.029	0.10613	0.01748	0.10234	0.01775
0.10563	0.029	0.10563	0.01748	0.10287	0.01775
0.10545	0.029	0.10545	0.01748	0.10186	0.01775
0.1054	0.029	0.1054	0.01748	0.10169	0.0178
0.10568	0.02905	0.10568	0.01753	0.10149	0.0178
0.10595	0.02905	0.10595	0.01753	0.10157	0.0178
0.10471	0.02905	0.10471	0.01753	0.10115	0.0178
0.10599	0.02905	0.10599	0.01753	0.10096	0.0178
0.10581	0.02905	0.10581	0.01753	0.10154	0.01784
0.10571	0.02905	0.10571	0.01753	0.10023	0.01784
0.10512	0.02909	0.10512	0.01757	0.10124	0.01784
0.10674	0.02909	0.10674	0.01757	0.10096	0.01784
0.10589	0.02909	0.10589	0.01757	0.10064	0.01784
0.10544	0.02909	0.10544	0.01757	0.10056	0.01789
0.10566	0.02909	0.10566	0.01757	0.10055	0.01789
0.10573	0.02914	0.10573	0.01762	0.10073	0.01789
0.10539	0.02914	0.10539	0.01762	0.10013	0.01789
0.10724	0.02914	0.10724	0.01762	0.09994	0.01793
0.10558	0.02914	0.10558	0.01762	0.09963	0.01793
0.10673	0.02918	0.10673	0.01767	0.09985	0.01793
0.10604	0.02918	0.10604	0.01767	0.09926	0.01793
0.10604	0.02918	0.10604	0.01767	0.09931	0.01793
0.10562	0.02918	0.10562	0.01767	0.09707	0.01798
0.10631	0.02918	0.10631	0.01767	0.09831	0.01798
0.10682	0.02923	0.10682	0.01771	0.09876	0.01798
0.10781	0.02923	0.10781	0.01771	0.09832	0.01798
0.10553	0.02923	0.10553	0.01771	0.0982	0.01798
0.10708	0.02923	0.10708	0.01771	0.09885	0.01803
0.1065	0.02928	0.1065	0.01776	0.09848	0.01803
0.1071	0.02928	0.1071	0.01776	0.09918	0.01803
0.10646	0.02928	0.10646	0.01776	0.09931	0.01803
0.10715	0.02928	0.10715	0.01776	0.09862	0.01803
0.10763	0.02928	0.10763	0.01776	0.09945	0.01807
0.10746	0.02928	0.10746	0.01776	0.09831	0.01807
0.10738	0.02932	0.10738	0.0178	0.09916	0.01807
0.10754	0.02932	0.10754	0.0178	0.09841	0.01807
0.10787	0.02932	0.10787	0.0178	0.09954	0.01807
0.10851	0.02932	0.10851	0.0178	0.10054	0.01812
0.10727	0.02932	0.10727	0.0178	0.10018	0.01812
0.10991	0.02937	0.10991	0.01785	0.10001	0.01812
0.1101	0.02937	0.1101	0.01785	0.09912	0.01812
0.10997	0.02937	0.10997	0.01785	0.09839	0.01816
0.11006	0.02937	0.11006	0.01785	0.10055	0.01816
0.11065	0.02937	0.11065	0.01785	0.10023	0.01816
0.11079	0.02941	0.11079	0.0179	0.1005	0.01816
0.11092	0.02941	0.11092	0.0179	0.10113	0.01816
0.11076	0.02941	0.11076	0.0179	0.10073	0.01821
0.11134	0.02941	0.11134	0.0179	0.10008	0.01821
0.11094	0.02946	0.11094	0.01794	0.1009	0.01821
0.11052	0.02946	0.11052	0.01794	0.10041	0.01821
0.11029	0.02946	0.11029	0.01794	0.1011	0.01821
0.11084	0.02946	0.11084	0.01794	0.10318	0.01825
0.11177	0.02946	0.11177	0.01794	0.10101	0.01825
0.11102	0.0295	0.11102	0.01799	0.10224	0.01825
0.11098	0.0295	0.11098	0.01799	0.10122	0.01825
0.11331	0.0295	0.11331	0.01799	0.1018	0.0183
0.11208	0.0295	0.11208	0.01799	0.10159	0.0183
0.1118	0.0295	0.1118	0.01799	0.10206	0.0183
0.11236	0.02955	0.11236	0.01803	0.10251	0.0183
0.11199	0.02955	0.11199	0.01803	0.10273	0.0183
0.11341	0.02955	0.11341	0.01803	0.10233	0.0183
0.11294	0.02955	0.11294	0.01803	0.10257	0.01835
0.11349	0.02955	0.11349	0.01803	0.10152	0.01835
0.11419	0.0296	0.11419	0.01808	0.10288	0.01835
0.11381	0.0296	0.11381	0.01808	0.10161	0.01835
0.11387	0.0296	0.11387	0.01808	0.10126	0.01835
0.11336	0.0296	0.11336	0.01808	0.10124	0.01839
0.11349	0.0296	0.11349	0.01808	0.10097	0.01839
0.11327	0.02964	0.11327	0.01813	0.10205	0.01839
0.11369	0.02964	0.11369	0.01813	0.10237	0.01839
0.11294	0.02964	0.11294	0.01813	0.10205	0.01844
0.11349	0.02964	0.11349	0.01813	0.10129	0.01844
0.11401	0.02964	0.11401	0.01813	0.10161	0.01844
0.11455	0.02969	0.11455	0.01817	0.10224	0.01844
0.11532	0.02969	0.11532	0.01817	0.10164	0.01844
0.11381	0.02969	0.11381	0.01817	0.10122	0.01848
0.11404	0.02969	0.11404	0.01817	0.10233	0.01848
0.11369	0.02969	0.11369	0.01817	0.10318	0.01848
0.11522	0.02973	0.11522	0.01822	0.10183	0.01848
0.11488	0.02973	0.11488	0.01822	0.10177	0.01853
0.11513	0.02973	0.11513	0.01822	0.10247	0.01853
0.11442	0.02973	0.11442	0.01822	0.10037	0.01853
0.11485	0.02978	0.11485	0.01826	0.10168	0.01853
0.11432	0.02978	0.11432	0.01826	0.10219	0.01853
0.11431	0.02978	0.11431	0.01826	0.10242	0.01853
0.11422	0.02978	0.11422	0.01826	0.10302	0.01857
0.11432	0.02978	0.11432	0.01826	0.10321	0.01857
0.11501	0.02983	0.11501	0.01831	0.10192	0.01857
0.11487	0.02983	0.11487	0.01831	0.1021	0.01857
0.11417	0.02983	0.11417	0.01831	0.10265	0.01857
0.11327	0.02983	0.11327	0.01831	0.10387	0.01862
0.11441	0.02983	0.11441	0.01831	0.10357	0.01862
0.11363	0.02987	0.11363	0.01835	0.10293	0.01862
0.11501	0.02987	0.11501	0.01835	0.1038	0.01862
0.1158	0.02987	0.1158	0.01835	0.1041	0.01867
0.11423	0.02987	0.11423	0.01835	0.10397	0.01867
0.11476	0.02987	0.11476	0.01835	0.10321	0.01867
0.11478	0.02992	0.11478	0.0184	0.10329	0.01867
0.11524	0.02992	0.11524	0.0184	0.10361	0.01867
0.11534	0.02992	0.11534	0.0184	0.10218	0.01871
0.11555	0.02992	0.11555	0.0184	0.1038	0.01871
0.11441	0.02996	0.11441	0.01845	0.1039	0.01871
0.11459	0.02996	0.11459	0.01845	0.10311	0.01871
0.11464	0.02996	0.11464	0.01845	0.10346	0.01871
0.11628	0.02996	0.11628	0.01845	0.10419	0.01876
0.11601	0.02996	0.11601	0.01845	0.10401	0.01876
0.11395	0.03001	0.11395	0.01849	0.10264	0.01876
0.11478	0.03001	0.11478	0.01849	0.10273	0.01876
0.11492	0.03001	0.11492	0.01849	0.10531	0.0188
0.11456	0.03001	0.11456	0.01849	0.10302	0.0188
0.11531	0.03001	0.11531	0.01849	0.10415	0.0188
0.11394	0.03006	0.11394	0.01854	0.10448	0.0188
0.11451	0.03006	0.11451	0.01854	0.10411	0.0188
0.11331	0.03006	0.11331	0.01854	0.10462	0.0188
0.11354	0.03006	0.11354	0.01854	0.1038	0.01885
0.11536	0.0301	0.11536	0.01858	0.10367	0.01885
0.11381	0.0301	0.11381	0.01858	0.10424	0.01885
0.11324	0.0301	0.11324	0.01858	0.10422	0.01885
0.11445	0.0301	0.11445	0.01858	0.10367	0.01889
0.11377	0.0301	0.11377	0.01858	0.10366	0.01889
0.11473	0.0301	0.11473	0.01858	0.10447	0.01889
0.11312	0.03015	0.11312	0.01863	0.10366	0.01889
0.11377	0.03015	0.11377	0.01863	0.10375	0.01889
0.11404	0.03015	0.11404	0.01863	0.1035	0.01894
0.11327	0.03015	0.11327	0.01863	0.10387	0.01894
0.11231	0.03019	0.11231	0.01868	0.10348	0.01894
0.11308	0.03019	0.11308	0.01868	0.10434	0.01894
0.11239	0.03019	0.11239	0.01868	0.1054	0.01894
0.11332	0.03019	0.11332	0.01868	0.10544	0.01898
0.11239	0.03019	0.11239	0.01868	0.10433	0.01898
0.11257	0.03024	0.11257	0.01872	0.10503	0.01898
0.11243	0.03024	0.11243	0.01872	0.10489	0.01898
0.11199	0.03024	0.11199	0.01872	0.10634	0.01903
0.11282	0.03024	0.11282	0.01872	0.10475	0.01903
0.11382	0.03028	0.11382	0.01877	0.10348	0.01903
0.11299	0.03028	0.11299	0.01877	0.10553	0.01903
0.11349	0.03028	0.11349	0.01877	0.10563	0.01903
0.11413	0.03028	0.11413	0.01877	0.10344	0.01908
0.1125	0.03028	0.1125	0.01877	0.10475	0.01908
0.11354	0.03033	0.11354	0.01881	0.10553	0.01908
0.11446	0.03033	0.11446	0.01881	0.1054	0.01908
0.11468	0.03033	0.11468	0.01881	0.10534	0.01908
0.11433	0.03033	0.11433	0.01881	0.10641	0.01908
0.11313	0.03033	0.11313	0.01881	0.1059	0.01912
0.11405	0.03038	0.11405	0.01886	0.1066	0.01912
0.11524	0.03038	0.11524	0.01886	0.10687	0.01912
0.11468	0.03038	0.11468	0.01886	0.10745	0.01912
0.1155	0.03038	0.1155	0.01886	0.10715	0.01917
0.11381	0.03038	0.11381	0.01886	0.10699	0.01917
0.11387	0.03042	0.11387	0.01891	0.106	0.01917
0.11369	0.03042	0.11369	0.01891	0.10576	0.01917
0.11409	0.03042	0.11409	0.01891	0.1086	0.01917
0.11566	0.03042	0.11566	0.01891	0.10712	0.01921
0.11596	0.03047	0.11596	0.01895	0.10782	0.01921
0.11614	0.03047	0.11614	0.01895	0.10864	0.01921
0.11571	0.03047	0.11571	0.01895	0.10852	0.01921
0.11646	0.03047	0.11646	0.01895	0.10745	0.01926
0.11661	0.03047	0.11661	0.01895	0.10722	0.01926
0.11619	0.03051	0.11619	0.019	0.10706	0.01926
0.11615	0.03051	0.11615	0.019	0.10738	0.01926
0.11697	0.03051	0.11697	0.019	0.10837	0.01926
0.1173	0.03051	0.1173	0.019	0.10818	0.0193
0.11702	0.03051	0.11702	0.019	0.10822	0.0193
0.1167	0.03056	0.1167	0.01904	0.10846	0.0193
0.11623	0.03056	0.11623	0.01904	0.10856	0.0193
0.11715	0.03056	0.11715	0.01904	0.10991	0.0193
0.11783	0.03056	0.11783	0.01904	0.10989	0.01935
0.11771	0.03056	0.11771	0.01904	0.10938	0.01935
0.11771	0.03061	0.11771	0.01909	0.10964	0.01935
0.11794	0.03061	0.11794	0.01909	0.10969	0.01935
0.11908	0.03061	0.11908	0.01909	0.10943	0.01935
0.11871	0.03061	0.11871	0.01909	0.10966	0.0194
0.11994	0.03061	0.11994	0.01909	0.10925	0.0194
0.11963	0.03065	0.11963	0.01913	0.11017	0.0194
0.11911	0.03065	0.11911	0.01913	0.10969	0.0194
0.11972	0.03065	0.11972	0.01913	0.10883	0.0194
0.11935	0.03065	0.11935	0.01913	0.10754	0.01944
0.12045	0.03065	0.12045	0.01913	0.10934	0.01944
0.1209	0.0307	0.1209	0.01918	0.1087	0.01944
0.11996	0.0307	0.11996	0.01918	0.10865	0.01944
0.12115	0.0307	0.12115	0.01918	0.10927	0.01944
0.12045	0.0307	0.12045	0.01918	0.1092	0.01949
0.12055	0.0307	0.12055	0.01918	0.11065	0.01949
0.12055	0.03074	0.12055	0.01923	0.10969	0.01949
0.12055	0.03074	0.12055	0.01923	0.1102	0.01949
0.12032	0.03074	0.12032	0.01923	0.11121	0.01953
0.12083	0.03074	0.12083	0.01923	0.1112	0.01953
0.12293	0.03074	0.12293	0.01923	0.11003	0.01953
0.12108	0.03079	0.12108	0.01927	0.11071	0.01953
0.12154	0.03079	0.12154	0.01927	0.11017	0.01953
0.12182	0.03079	0.12182	0.01927	0.1119	0.01958
0.12196	0.03079	0.12196	0.01927	0.11092	0.01958
0.12274	0.03083	0.12274	0.01932	0.11033	0.01958
0.12145	0.03083	0.12145	0.01932	0.11126	0.01958
0.122	0.03083	0.122	0.01932	0.11011	0.01958
0.12424	0.03083	0.12424	0.01932	0.11062	0.01962
0.12315	0.03083	0.12315	0.01932	0.10978	0.01962
0.12279	0.03088	0.12279	0.01936	0.11031	0.01962
0.1221	0.03088	0.1221	0.01936	0.11028	0.01962
0.12237	0.03088	0.12237	0.01936	0.11024	0.01962
0.12353	0.03088	0.12353	0.01936	0.11024	0.01967
0.1226	0.03088	0.1226	0.01936	0.11043	0.01967
0.12283	0.03093	0.12283	0.01941	0.11143	0.01967
0.12324	0.03093	0.12324	0.01941	0.11092	0.01967
0.12307	0.03093	0.12307	0.01941	0.11115	0.01967
0.1229	0.03093	0.1229	0.01941	0.11293	0.01972
0.12332	0.03093	0.12332	0.01941	0.11122	0.01972
0.12301	0.03097	0.12301	0.01946	0.11115	0.01972
0.12466	0.03097	0.12466	0.01946	0.11144	0.01972
0.12401	0.03097	0.12401	0.01946	0.11194	0.01976
0.12296	0.03097	0.12296	0.01946	0.11125	0.01976
0.12387	0.03097	0.12387	0.01946	0.11194	0.01976
0.12297	0.03102	0.12297	0.0195	0.11192	0.01976
0.12298	0.03102	0.12298	0.0195	0.11079	0.01976
0.12343	0.03102	0.12343	0.0195	0.11022	0.01981
0.12292	0.03102	0.12292	0.0195	0.11171	0.01981
0.12352	0.03106	0.12352	0.01955	0.11153	0.01981
0.12443	0.03106	0.12443	0.01955	0.11046	0.01981
0.12279	0.03106	0.12279	0.01955	0.11057	0.01981
0.12375	0.03106	0.12375	0.01955	0.11271	0.01985
0.12259	0.03106	0.12259	0.01955	0.11006	0.01985
0.12237	0.03111	0.12237	0.01959	0.11102	0.01985
0.12182	0.03111	0.12182	0.01959	0.11167	0.01985
0.12251	0.03111	0.12251	0.01959	0.11052	0.01985
0.12348	0.03111	0.12348	0.01959	0.11248	0.0199
0.1232	0.03111	0.1232	0.01959	0.11199	0.0199
0.12241	0.03116	0.12241	0.01964	0.11093	0.0199
0.12279	0.03116	0.12279	0.01964	0.11185	0.0199
0.12201	0.03116	0.12201	0.01964	0.11204	0.0199
0.12348	0.03116	0.12348	0.01964	0.11008	0.01994
0.12296	0.03116	0.12296	0.01964	0.11241	0.01994
0.12218	0.0312	0.12218	0.01968	0.11149	0.01994
0.12261	0.0312	0.12261	0.01968	0.11149	0.01994
0.12284	0.0312	0.12284	0.01968	0.11071	0.01999
0.12283	0.0312	0.12283	0.01968	0.11144	0.01999
0.12269	0.03125	0.12269	0.01973	0.11148	0.01999
0.12324	0.03125	0.12324	0.01973	0.11143	0.01999
0.12265	0.03125	0.12265	0.01973	0.11139	0.01999
0.12376	0.03125	0.12376	0.01973	0.11167	0.02003
0.12424	0.03125	0.12424	0.01973	0.11149	0.02003
0.12406	0.03129	0.12406	0.01978	0.1113	0.02003
0.12348	0.03129	0.12348	0.01978	0.11084	0.02003
0.12279	0.03129	0.12279	0.01978	0.11157	0.02003
0.1239	0.03129	0.1239	0.01978	0.11246	0.02008
0.12375	0.03129	0.12375	0.01978	0.11117	0.02008
0.12411	0.03134	0.12411	0.01982	0.11135	0.02008
0.1233	0.03134	0.1233	0.01982	0.11217	0.02008
0.12403	0.03134	0.12403	0.01982	0.11213	0.02008
0.12389	0.03134	0.12389	0.01982	0.11122	0.02013
0.12544	0.03134	0.12544	0.01982	0.1122	0.02013
0.12318	0.03139	0.12318	0.01987	0.11185	0.02013
0.12438	0.03139	0.12438	0.01987	0.11111	0.02013
0.12488	0.03139	0.12488	0.01987	0.11001	0.02013
0.12411	0.03139	0.12411	0.01987	0.11038	0.02017
0.12489	0.03139	0.12489	0.01987	0.11084	0.02017
0.12488	0.03143	0.12488	0.01991	0.11099	0.02017
0.12483	0.03143	0.12483	0.01991	0.11148	0.02017
0.12468	0.03143	0.12468	0.01991	0.11089	0.02017
0.12359	0.03143	0.12359	0.01991	0.11231	0.02022
0.12425	0.03148	0.12425	0.01996	0.11089	0.02022
0.12494	0.03148	0.12494	0.01996	0.11066	0.02022
0.12419	0.03148	0.12419	0.01996	0.11071	0.02022
0.12474	0.03148	0.12474	0.01996	0.11276	0.02026
0.12387	0.03148	0.12387	0.01996	0.11217	0.02026
0.12484	0.03152	0.12484	0.02001	0.11148	0.02026
0.12636	0.03152	0.12636	0.02001	0.11284	0.02026
0.12606	0.03152	0.12606	0.02001	0.1119	0.02026
0.12544	0.03152	0.12544	0.02001	0.11262	0.02031
0.12433	0.03152	0.12433	0.02001	0.11294	0.02031
0.12671	0.03157	0.12671	0.02005	0.11241	0.02031
0.12484	0.03157	0.12484	0.02005	0.11422	0.02031
0.12589	0.03157	0.12589	0.02005	0.11377	0.02031
0.12563	0.03157	0.12563	0.02005	0.11386	0.02035
0.12581	0.03157	0.12581	0.02005	0.1134	0.02035
0.12645	0.03161	0.12645	0.0201	0.11317	0.02035
0.12636	0.03161	0.12636	0.0201	0.11259	0.02035
0.12608	0.03161	0.12608	0.0201	0.11257	0.02035
0.12497	0.03161	0.12497	0.0201	0.11293	0.0204
0.1253	0.03166	0.1253	0.02014	0.11262	0.0204
0.12567	0.03166	0.12567	0.02014	0.11208	0.0204
0.12534	0.03166	0.12534	0.02014	0.11199	0.0204
0.12684	0.03166	0.12684	0.02014	0.11203	0.0204
0.12589	0.03166	0.12589	0.02014	0.11326	0.02045
0.12544	0.03171	0.12544	0.02019	0.11116	0.02045
0.12571	0.03171	0.12571	0.02019	0.11313	0.02045
0.12673	0.03171	0.12673	0.02019	0.11246	0.02045
0.12489	0.03171	0.12489	0.02019	0.1134	0.02049
0.12563	0.03171	0.12563	0.02019	0.11276	0.02049
0.12639	0.03175	0.12639	0.02024	0.1131	0.02049
0.12553	0.03175	0.12553	0.02024	0.11243	0.02049
0.12623	0.03175	0.12623	0.02024	0.11225	0.02049
0.12617	0.03175	0.12617	0.02024	0.10955	0.02054
0.12595	0.03175	0.12595	0.02024	0.11112	0.02054
0.1269	0.0318	0.1269	0.02028	0.11079	0.02054
0.12659	0.0318	0.12659	0.02028	0.11047	0.02054
0.12687	0.0318	0.12687	0.02028	0.11108	0.02054
0.12655	0.0318	0.12655	0.02028	0.10975	0.02058
0.12655	0.03184	0.12655	0.02033	0.11098	0.02058
0.12707	0.03184	0.12707	0.02033	0.11084	0.02058
0.12791	0.03184	0.12791	0.02033	0.11093	0.02058
0.12548	0.03184	0.12548	0.02033	0.11069	0.02058
0.12636	0.03184	0.12636	0.02033	0.11125	0.02063
0.1278	0.03184	0.1278	0.02033	0.11079	0.02063
0.12767	0.03189	0.12767	0.02037	0.11143	0.02063
0.12727	0.03189	0.12727	0.02037	0.11158	0.02063
0.12759	0.03189	0.12759	0.02037	0.1118	0.02063
0.12759	0.03189	0.12759	0.02037	0.11239	0.02067
0.12997	0.03194	0.12997	0.02042	0.11129	0.02067
0.12931	0.03194	0.12931	0.02042	0.11146	0.02067
0.12815	0.03194	0.12815	0.02042	0.11296	0.02067
0.12893	0.03194	0.12893	0.02042	0.11062	0.02072
0.13118	0.03198	0.13118	0.02046	0.11211	0.02072
0.13015	0.03198	0.13015	0.02046	0.11162	0.02072
0.13045	0.03198	0.13045	0.02046	0.11148	0.02072
0.13218	0.03198	0.13218	0.02046	0.11162	0.02072
0.1328	0.03203	0.1328	0.02051	0.11094	0.02077
0.13208	0.03203	0.13208	0.02051	0.11094	0.02077
0.1328	0.03203	0.1328	0.02051	0.11157	0.02077
0.13392	0.03207	0.13392	0.02056	0.11236	0.02077
0.13317	0.03207	0.13317	0.02056	0.11275	0.02077
0.13287	0.03207	0.13287	0.02056	0.11336	0.02081
0.1332	0.03212	0.1332	0.0206	0.11262	0.02081
0.13392	0.03212	0.13392	0.0206	0.11248	0.02081
0.13418	0.03212	0.13418	0.0206	0.11162	0.02081
0.13501	0.03217	0.13501	0.02065	0.1113	0.02081
0.13359	0.03217	0.13359	0.02065	0.11423	0.02086
0.13512	0.03221	0.13512	0.02069	0.11327	0.02086
0.13371	0.03221	0.13371	0.02069	0.11289	0.02086
0.13548	0.03226	0.13548	0.02074	0.11197	0.02086
0.13456	0.03226	0.13456	0.02074	0.11431	0.02086
0.13559	0.0323	0.13559	0.02079	0.11326	0.0209
0.13531	0.0323	0.13531	0.02079	0.11203	0.0209
0.13522	0.03235	0.13522	0.02083	0.11335	0.0209
0.13622	0.03235	0.13622	0.02083	0.11391	0.0209
0.13629	0.03239	0.13629	0.02088	0.11408	0.0209
0.13786	0.03239	0.13786	0.02088	0.11303	0.02095
0.13724	0.03244	0.13724	0.02092	0.1133	0.02095
0.13915	0.03244	0.13915	0.02092	0.11422	0.02095
0.13977	0.03249	0.13977	0.02097	0.11369	0.02095
0.14033	0.03249	0.14033	0.02097	0.11476	0.02099
0.14066	0.03253	0.14066	0.02102	0.11485	0.02099
0.14234	0.03253	0.14234	0.02102	0.11494	0.02099
0.14282	0.03258	0.14282	0.02106	0.11564	0.02099
0.14255	0.03258	0.14255	0.02106	0.11532	0.02099
0.14243	0.03262	0.14243	0.02111	0.11441	0.02104
0.14381	0.03267	0.14381	0.02115	0.11534	0.02104
0.14464	0.03267	0.14464	0.02115	0.11492	0.02104
0.14475	0.03272	0.14475	0.0212	0.11482	0.02104
0.14529	0.03276	0.14529	0.02124	0.11446	0.02104
0.14656	0.03276	0.14656	0.02124	0.1145	0.02108
0.14648	0.03281	0.14648	0.02129	0.11405	0.02108
0.1481	0.03285	0.1481	0.02134	0.11459	0.02108
0.14927	0.03285	0.14927	0.02134	0.11469	0.02108
0.14922	0.0329	0.14922	0.02138	0.11308	0.02108
0.14888	0.03294	0.14888	0.02143	0.11439	0.02113
0.15085	0.03294	0.15085	0.02143	0.1146	0.02113
0.14884	0.03299	0.14884	0.02147	0.11341	0.02113
0.14966	0.03304	0.14966	0.02152	0.11408	0.02113
0.1514	0.03308	0.1514	0.02157	0.11482	0.02113
0.15104	0.03308	0.15104	0.02157	0.11439	0.02118
0.15185	0.03313	0.15185	0.02161	0.11431	0.02118
0.15378	0.03317	0.15378	0.02166	0.11437	0.02118
0.15149	0.03317	0.15149	0.02166	0.11395	0.02118
0.1528	0.03322	0.1528	0.0217	0.11447	0.02122
0.1514	0.03327	0.1514	0.02175	0.11552	0.02122
0.15084	0.03331	0.15084	0.02179	0.11359	0.02122
0.15183	0.03336	0.15183	0.02184	0.11382	0.02122
0.15254	0.0334	0.15254	0.02189	0.11373	0.02122
0.15269	0.0334	0.15269	0.02189	0.11276	0.02127
0.15239	0.0335	0.15239	0.02198	0.11317	0.02127
0.15363	0.0335	0.15363	0.02198	0.11437	0.02127
0.15381	0.03354	0.15381	0.02202	0.11381	0.02127
0.15468	0.03359	0.15468	0.02207	0.11442	0.02127
0.15424	0.03363	0.15424	0.02212	0.1145	0.02131
0.15708	0.03368	0.15708	0.02216	0.11462	0.02131
0.15725	0.03372	0.15725	0.02221	0.11391	0.02131
0.15803	0.03377	0.15803	0.02225	0.11464	0.02131
0.15708	0.03382	0.15708	0.0223	0.11326	0.02131
0.15605	0.03386	0.15605	0.02235	0.1141	0.02136
0.1572	0.03391	0.1572	0.02239	0.11344	0.02136
0.15814	0.03395	0.15814	0.02244	0.11501	0.02136
0.15966	0.03405	0.15966	0.02253	0.11541	0.02136
0.15882	0.03405	0.15882	0.02253	0.11385	0.02136
0.15995	0.03409	0.15995	0.02257	0.11399	0.0214
0.16034	0.03418	0.16034	0.02267	0.11369	0.0214
0.16046	0.03418	0.16046	0.02267	0.11414	0.0214
0.16096	0.03428	0.16096	0.02276	0.11424	0.0214
0.16257	0.03432	0.16257	0.0228	0.11469	0.0214
0.16175	0.03437	0.16175	0.02285	0.11446	0.02145
0.16131	0.03441	0.16131	0.0229	0.11427	0.02145
0.16292	0.03446	0.16292	0.02294	0.1145	0.02145
0.1621	0.0345	0.1621	0.02299	0.11363	0.02145
0.16138	0.0346	0.16138	0.02308	0.11459	0.02145
0.16229	0.0346	0.16229	0.02308	0.11487	0.0215
0.16306	0.03469	0.16306	0.02317	0.11531	0.0215
0.16168	0.03483	0.16168	0.02331	0.1146	0.0215
0.16246	0.03505	0.16246	0.02354	0.11504	0.0215
0.16329	0.03505	0.16329	0.02354	0.11534	0.02154
0.16186	0.03515	0.16186	0.02363	0.11497	0.02154
0.16293	0.03519	0.16293	0.02368	0.11693	0.02154
0.16383	0.03528	0.16383	0.02377	0.11628	0.02154
0.16376	0.03533	0.16376	0.02381	0.11679	0.02159
0.16485	0.03538	0.16485	0.02386	0.11577	0.02159
0.16493	0.03547	0.16493	0.02395	0.1151	0.02159
0.16566	0.03551	0.16566	0.024	0.1173	0.02159
0.16586	0.03574	0.16586	0.02423	0.1147	0.02159
0.16758	0.03593	0.16758	0.02441	0.11716	0.02159
0.16841	0.03602	0.16841	0.0245	0.11632	0.02163
0.16815	0.03606	0.16815	0.02455	0.11609	0.02163
0.16479	0.0362	0.16479	0.02468	0.1161	0.02163
0.16413	0.03625	0.16413	0.02473	0.11619	0.02163
0.16678	0.03629	0.16678	0.02478	0.11583	0.02163
0.16839	0.03643	0.16839	0.02491	0.11625	0.02168
0.16899	0.03648	0.16899	0.02496	0.11518	0.02168
0.17254	0.03657	0.17254	0.02505	0.11441	0.02168
0.17185	0.03661	0.17185	0.0251	0.11541	0.02168
0.17252	0.03666	0.17252	0.02514	0.11643	0.02172
0.17549	0.0368	0.17549	0.02528	0.11483	0.02172
0.1773	0.03684	0.1773	0.02533	0.11697	0.02172
0.17864	0.03698	0.17864	0.02546	0.11515	0.02172
0.18017	0.03703	0.18017	0.02551	0.11683	0.02172
0.18103	0.03707	0.18103	0.02556	0.11578	0.02177
0.1775	0.03716	0.1775	0.02565	0.11575	0.02177
0.18073	0.03726	0.18073	0.02574	0.11611	0.02177
0.18237	0.0373	0.18237	0.02579	0.11683	0.02177
0.18366	0.03744	0.18366	0.02592	0.11725	0.02182
0.18489	0.03749	0.18489	0.02597	0.11614	0.02182
0.18648	0.03758	0.18648	0.02606	0.11531	0.02182
0.18645	0.03767	0.18645	0.02615	0.11661	0.02182
0.18553	0.03772	0.18553	0.0262	0.11711	0.02182
0.18631	0.03781	0.18631	0.02629	0.11684	0.02186
0.18657	0.0379	0.18657	0.02638	0.11834	0.02186
0.18837	0.03799	0.18837	0.02647	0.11716	0.02186
0.18981	0.03804	0.18981	0.02652	0.11753	0.02186
0.19042	0.03813	0.19042	0.02661	0.11775	0.02186
0.1932	0.03827	0.1932	0.02675	0.11735	0.02186
0.19646	0.0384	0.19646	0.02689	0.11825	0.02191
0.20149	0.03863	0.20149	0.02712	0.1188	0.02191
0.20339	0.03882	0.20339	0.0273	0.11748	0.02191
0.20302	0.03886	0.20302	0.02735	0.11908	0.02191
0.204	0.03895	0.204	0.02744	0.11848	0.02195
0.20245	0.03909	0.20245	0.02757	0.1178	0.02195
0.20171	0.03914	0.20171	0.02762	0.11822	0.02195
0.2026	0.03927	0.2026	0.02776	0.11866	0.02195
0.20487	0.03932	0.20487	0.0278	0.11799	0.02195
0.20623	0.03946	0.20623	0.02794	0.11697	0.022
0.20731	0.0395	0.20731	0.02799	0.11845	0.022
0.20583	0.0396	0.20583	0.02808	0.11876	0.022
0.20893	0.03969	0.20893	0.02817	0.11825	0.022
0.20899	0.03978	0.20899	0.02826	0.11743	0.022
0.21055	0.03983	0.21055	0.02831	0.11908	0.02204
0.20972	0.0401	0.20972	0.02858	0.1185	0.02204
0.21118	0.04038	0.21118	0.02886	0.11873	0.02204
0.21335	0.04051	0.21335	0.029	0.11866	0.02204
0.21172	0.04065	0.21172	0.02913	0.12013	0.02209
0.21265	0.0407	0.21265	0.02918	0.11879	0.02209
0.21492	0.04079	0.21492	0.02927	0.11912	0.02209
0.21508	0.04093	0.21508	0.02941	0.12027	0.02209
0.21595	0.04097	0.21595	0.02946	0.11873	0.02209
0.21831	0.04116	0.21831	0.02964	0.11834	0.02214
0.21755	0.0412	0.21755	0.02968	0.11815	0.02214
0.2205	0.04134	0.2205	0.02982	0.11902	0.02214
0.21763	0.04143	0.21763	0.02991	0.11875	0.02214
0.21596	0.04148	0.21596	0.02996	0.11931	0.02214
0.21545	0.04161	0.21545	0.0301	0.11843	0.02218
0.21546	0.04171	0.21546	0.03019	0.11725	0.02218
0.21493	0.0418	0.21493	0.03028	0.11839	0.02218
0.21499	0.04194	0.21499	0.03042	0.11794	0.02218
0.21596	0.04203	0.21596	0.03051	0.11811	0.02218
0.21665	0.04217	0.21665	0.03065	0.11848	0.02223
0.21819	0.04226	0.21819	0.03074	0.11911	0.02223
0.22074	0.04235	0.22074	0.03083	0.11958	0.02223
0.22471	0.04249	0.22471	0.03097	0.1194	0.02223
0.22738	0.04258	0.22738	0.03106	0.1205	0.02227
0.22901	0.04276	0.22901	0.03124	0.11824	0.02227
0.2287	0.04281	0.2287	0.03129	0.11944	0.02227
0.22806	0.0429	0.22806	0.03138	0.1194	0.02227
0.22818	0.04304	0.22818	0.03152	0.11973	0.02227
0.23075	0.04313	0.23075	0.03161	0.11999	0.02232
0.2331	0.04327	0.2331	0.03175	0.11996	0.02232
0.23654	0.04336	0.23654	0.03184	0.11866	0.02232
0.23676	0.04345	0.23676	0.03193	0.11903	0.02232
0.23818	0.04363	0.23818	0.03212	0.11917	0.02232
0.24098	0.04368	0.24098	0.03216	0.11875	0.02236
0.24301	0.04377	0.24301	0.03225	0.11834	0.02236
0.24512	0.04395	0.24512	0.03244	0.1194	0.02236
0.24549	0.04405	0.24549	0.03253	0.11999	0.02236
0.24252	0.04418	0.24252	0.03267	0.12039	0.02236
0.24255	0.04428	0.24255	0.03276	0.12041	0.02241
0.24064	0.04432	0.24064	0.0328	0.11935	0.02241
0.24116	0.0445	0.24116	0.03299	0.11852	0.02241
0.24241	0.04455	0.24241	0.03303	0.11808	0.02241
0.24799	0.04473	0.24799	0.03322	0.11926	0.02241
0.25051	0.04483	0.25051	0.03331	0.12083	0.02246
0.25178	0.04492	0.25178	0.0334	0.12071	0.02246
0.25345	0.04506	0.25345	0.03354	0.12037	0.02246
0.25619	0.04515	0.25619	0.03363	0.12017	0.02246
0.25625	0.04533	0.25625	0.03381	0.12059	0.0225
0.25599	0.04542	0.25599	0.03391	0.12141	0.0225
0.25554	0.04551	0.25554	0.034	0.11943	0.0225
0.25106	0.04565	0.25106	0.03413	0.11945	0.0225
0.25122	0.04574	0.25122	0.03423	0.12028	0.0225
0.25738	0.04593	0.25738	0.03441	0.11981	0.02255
0.2582	0.04597	0.2582	0.03446	0.12062	0.02255
0.25731	0.04606	0.25731	0.03455	0.12046	0.02255
0.2506	0.04625	0.2506	0.03473	0.12223	0.02255
0.2495	0.04634	0.2495	0.03482	0.11972	0.02255
0.25326	0.04652	0.25326	0.03501	0.12064	0.02259
0.25543	0.04661	0.25543	0.0351	0.12039	0.02259
0.2521	0.04671	0.2521	0.03519	0.12073	0.02259
0.25359	0.04689	0.25359	0.03537	0.11989	0.02259
0.25341	0.04698	0.25341	0.03546	0.12057	0.02259
0.25744	0.04716	0.25744	0.03565	0.12055	0.02264
0.25818	0.04726	0.25818	0.03574	0.12096	0.02264
0.25901	0.04735	0.25901	0.03583	0.12087	0.02264
0.26064	0.04753	0.26064	0.03602	0.12032	0.02264
0.26117	0.04762	0.26117	0.03611	0.12046	0.02268
0.26246	0.04781	0.26246	0.03629	0.12118	0.02268
0.26146	0.0479	0.26146	0.03638	0.12122	0.02268
0.25936	0.04799	0.25936	0.03647	0.12104	0.02268
0.25868	0.04822	0.25868	0.0367	0.12059	0.02268
0.26143	0.04827	0.26143	0.03675	0.11995	0.02273
0.26418	0.0485	0.26418	0.03698	0.12068	0.02273
0.26247	0.04859	0.26247	0.03707	0.1208	0.02273
0.26138	0.04872	0.26138	0.03721	0.12101	0.02273
0.26299	0.04886	0.26299	0.03735	0.12219	0.02273
0.2646	0.049	0.2646	0.03748	0.12117	0.02277
0.26711	0.04909	0.26711	0.03757	0.12161	0.02277
0.26652	0.04927	0.26652	0.03776	0.1214	0.02277
0.26762	0.04937	0.26762	0.03785	0.1221	0.02277
0.27108	0.0496	0.27108	0.03808	0.12283	0.02277
0.26724	0.04973	0.26724	0.03822	0.12228	0.02282
0.2722	0.04992	0.2722	0.0384	0.12251	0.02282
0.27194	0.05001	0.27194	0.03849	0.12315	0.02282
0.27534	0.0501	0.27534	0.03858	0.12468	0.02287
0.27703	0.05028	0.27703	0.03877	0.12213	0.02287
0.27775	0.05042	0.27775	0.0389	0.12411	0.02287
0.27972	0.05051	0.27972	0.039	0.12274	0.02287
0.27717	0.05074	0.27717	0.03923	0.12428	0.02291
0.27972	0.05083	0.27972	0.03932	0.12389	0.02291
0.28603	0.05102	0.28603	0.0395	0.12387	0.02291
0.28564	0.05116	0.28564	0.03964	0.12352	0.02291
0.28587	0.05125	0.28587	0.03973	0.12361	0.02291
0.28688	0.05143	0.28688	0.03991	0.12352	0.02296
0.28659	0.05152	0.28659	0.04001	0.12475	0.02296
0.28567	0.05175	0.28567	0.04023	0.1239	0.02296
0.28511	0.05184	0.28511	0.04033	0.12438	0.02296
0.28553	0.05194	0.28553	0.04042	0.12503	0.023
0.28561	0.05216	0.28561	0.04065	0.12508	0.023
0.2862	0.05226	0.2862	0.04074	0.1248	0.023
0.2886	0.05249	0.2886	0.04097	0.12484	0.023
0.28855	0.05262	0.28855	0.04111	0.1253	0.023
0.29425	0.05281	0.29425	0.04129	0.12516	0.02305
0.29191	0.05294	0.29191	0.04143	0.1247	0.02305
0.29085	0.05304	0.29085	0.04152	0.12512	0.02305
0.2949	0.05322	0.2949	0.0417	0.12461	0.02305
0.29464	0.05336	0.29464	0.04184	0.12545	0.02309
0.29497	0.05349	0.29497	0.04198	0.12447	0.02309
0.29958	0.05372	0.29958	0.04221	0.12597	0.02314
0.30127	0.05377	0.30127	0.04225	0.12516	0.02314
0.30183	0.05405	0.30183	0.04253	0.12471	0.02314
0.30432	0.05414	0.30432	0.04262	0.12338	0.02314
0.30417	0.05427	0.30417	0.04276	0.12462	0.02314
0.30532	0.05446	0.30532	0.04294	0.12484	0.02319
0.30629	0.05455	0.30629	0.04303	0.12438	0.02319
0.30754	0.05483	0.30754	0.04331	0.12517	0.02319
0.30897	0.05487	0.30897	0.04335	0.12572	0.02319
0.31257	0.05501	0.31257	0.04349	0.12661	0.02323
0.31568	0.05524	0.31568	0.04372	0.12466	0.02323
0.31631	0.05538	0.31631	0.04386	0.1247	0.02328
0.32069	0.05556	0.32069	0.04404	0.12389	0.02328
0.32185	0.0557	0.32185	0.04418	0.12406	0.02328
0.32087	0.05579	0.32087	0.04427	0.12415	0.02328
0.3198	0.05597	0.3198	0.04446	0.12567	0.02332
0.31778	0.05611	0.31778	0.04459	0.12389	0.02332
0.31512	0.05634	0.31512	0.04482	0.12466	0.02332
0.31322	0.05643	0.31322	0.04491	0.12466	0.02332
0.31559	0.05657	0.31559	0.04505	0.12516	0.02332
0.31206	0.0568	0.31206	0.04528	0.12503	0.02337
0.31391	0.05694	0.31391	0.04542	0.12479	0.02341
0.31622	0.05717	0.31622	0.04565	0.12454	0.02341
0.31664	0.0573	0.31664	0.04579	0.1248	0.02341
0.31785	0.05739	0.31785	0.04588	0.12664	0.02341
0.32152	0.05762	0.32152	0.04611	0.12479	0.02341
0.32234	0.05776	0.32234	0.04624	0.12535	0.02346
0.32512	0.05799	0.32512	0.04647	0.12457	0.02346
0.3261	0.05808	0.3261	0.04657	0.12431	0.02346
0.32711	0.05822	0.32711	0.0467	0.12548	0.02346
0.32888	0.05849	0.32888	0.04698	0.1253	0.02346
0.33203	0.05863	0.33203	0.04712	0.12512	0.02351
0.33462	0.05882	0.33462	0.0473	0.12562	0.02351
0.33539	0.05895	0.33539	0.04744	0.12521	0.02351
0.33436	0.05909	0.33436	0.04757	0.12586	0.02351
0.33729	0.05928	0.33729	0.04776	0.12758	0.02355
0.33836	0.05941	0.33836	0.0479	0.12553	0.02355
0.34129	0.05955	0.34129	0.04803	0.12731	0.02355
0.34227	0.05983	0.34227	0.04831	0.12627	0.0236
0.34297	0.05992	0.34297	0.0484	0.12687	0.0236
0.34744	0.06015	0.34744	0.04863	0.12776	0.0236
0.34916	0.06028	0.34916	0.04877	0.12611	0.02364
0.35084	0.06051	0.35084	0.049	0.12636	0.02364
0.35241	0.06061	0.35241	0.04909	0.12461	0.02364
0.35233	0.06074	0.35233	0.04923	0.12375	0.02364
0.35363	0.06102	0.35363	0.0495	0.12383	0.02364
0.35372	0.06111	0.35372	0.04959	0.12415	0.02369
0.35636	0.06125	0.35636	0.04973	0.12369	0.02369
0.35976	0.06148	0.35976	0.04996	0.12415	0.02369
0.36055	0.06157	0.36055	0.05005	0.12389	0.02369
0.36589	0.06184	0.36589	0.05033	0.12278	0.02373
0.36772	0.06194	0.36772	0.05042	0.1247	0.02373
0.36969	0.06217	0.36969	0.05065	0.12364	0.02373
0.36741	0.0623	0.36741	0.05079	0.12343	0.02373
0.36824	0.06244	0.36824	0.05092	0.12346	0.02373
0.36694	0.06262	0.36694	0.05111	0.12315	0.02373
0.36629	0.06276	0.36629	0.05124	0.12406	0.02378
0.36488	0.0629	0.36488	0.05138	0.12159	0.02382
0.36496	0.06317	0.36496	0.05166	0.12292	0.02382
0.35871	0.06327	0.35871	0.05175	0.12166	0.02382
0.36103	0.0635	0.36103	0.05198	0.12187	0.02382
0.36446	0.06363	0.36446	0.05212	0.12215	0.02382
0.37367	0.06386	0.37367	0.05235	0.12275	0.02387
0.37613	0.064	0.37613	0.05248	0.12357	0.02387
0.37837	0.06414	0.37837	0.05262	0.12424	0.02387
0.37958	0.06441	0.37958	0.0529	0.12259	0.02387
0.37831	0.0645	0.37831	0.05299	0.12366	0.02387
0.38355	0.06464	0.38355	0.05313	0.12448	0.02392
0.38506	0.06492	0.38506	0.0534	0.12352	0.02392
0.38568	0.06506	0.38568	0.05354	0.12392	0.02392
0.38648	0.06528	0.38648	0.05377	0.12315	0.02392
0.38819	0.06542	0.38819	0.05391	0.12364	0.02392
0.38939	0.06556	0.38939	0.05404	0.12369	0.02396
0.39096	0.06574	0.39096	0.05423	0.12508	0.02396
0.39282	0.06588	0.39282	0.05436	0.12301	0.02396
0.39409	0.06616	0.39409	0.05464	0.12385	0.02396
0.394	0.06629	0.394	0.05478	0.12362	0.02396
0.39326	0.06639	0.39326	0.05487	0.12346	0.02401
0.39634	0.06666	0.39634	0.05514	0.12387	0.02401
0.39755	0.0668	0.39755	0.05528	0.12415	0.02401
0.39704	0.06703	0.39704	0.05551	0.12468	0.02401
0.3961	0.06717	0.3961	0.05565	0.12461	0.02405
0.3929	0.0673	0.3929	0.05579	0.12392	0.02405
0.39243	0.06753	0.39243	0.05602	0.12502	0.02405
0.39234	0.06767	0.39234	0.05615	0.12466	0.02405
0.39346	0.06794	0.39346	0.05643	0.12517	0.02405
0.39029	0.06808	0.39029	0.05657	0.12475	0.0241
0.38832	0.06817	0.38832	0.05666	0.12476	0.0241
0.39436	0.0685	0.39436	0.05698	0.12489	0.0241
0.39702	0.06863	0.39702	0.05712	0.12493	0.0241
0.40196	0.06886	0.40196	0.05735	0.12554	0.0241
0.40317	0.069	0.40317	0.05748	0.12392	0.02414
0.40507	0.06918	0.40507	0.05767	0.12526	0.02414
0.41082	0.06941	0.41082	0.0579	0.12567	0.02414
0.41057	0.06955	0.41057	0.05803	0.12622	0.02419
0.41424	0.06983	0.41424	0.05831	0.1253	0.02419
0.41619	0.06992	0.41619	0.0584	0.12708	0.02419
0.41697	0.07006	0.41697	0.05854	0.1269	0.02424
0.42431	0.07038	0.42431	0.05886	0.12752	0.02424
0.42665	0.07051	0.42665	0.059	0.12837	0.02428
0.4262	0.07074	0.4262	0.05923	0.12796	0.02433
0.42907	0.07088	0.42907	0.05936	0.12946	0.02433
0.43048	0.07111	0.43048	0.05959	0.12887	0.02433
0.43064	0.07125	0.43064	0.05973	0.12871	0.02433
0.42883	0.07139	0.42883	0.05987	0.12906	0.02433
0.43526	0.07166	0.43526	0.06014	0.1278	0.02437
0.43587	0.07175	0.43587	0.06024	0.1279	0.02437
0.43763	0.07189	0.43763	0.06037	0.12843	0.02437
0.43783	0.07217	0.43783	0.06065	0.12842	0.02442
0.43685	0.07226	0.43685	0.06074	0.13018	0.02442
0.43739	0.07253	0.43739	0.06102	0.12975	0.02442
0.43961	0.07272	0.43961	0.0612	0.13014	0.02446
0.44017	0.07294	0.44017	0.06143	0.1311	0.02446
0.43943	0.07308	0.43943	0.06157	0.13112	0.02446
0.43875	0.07322	0.43875	0.0617	0.13121	0.02446
0.44059	0.07345	0.44059	0.06193	0.13153	0.02451
0.44414	0.07359	0.44414	0.06207	0.13115	0.02451
0.44499	0.07391	0.44499	0.06239	0.13246	0.02451
0.44546	0.07405	0.44546	0.06253	0.13335	0.02456
0.44768	0.07414	0.44768	0.06262	0.13329	0.02456
0.44298	0.07441	0.44298	0.0629	0.13283	0.0246
0.44786	0.07455	0.44786	0.06303	0.13335	0.0246
0.45282	0.07483	0.45282	0.06331	0.13567	0.02465
0.45434	0.07496	0.45434	0.06345	0.1342	0.02465
0.45411	0.0751	0.45411	0.06358	0.13512	0.02469
0.45693	0.07533	0.45693	0.06381	0.13487	0.02469
0.45899	0.07547	0.45899	0.06395	0.1349	0.02469
0.45932	0.07579	0.45932	0.06427	0.13752	0.02474
0.46192	0.07588	0.46192	0.06436	0.1352	0.02474
0.46278	0.07602	0.46278	0.0645	0.13757	0.02478
0.46544	0.07629	0.46544	0.06478	0.13843	0.02478
0.46655	0.07643	0.46655	0.06491	0.13896	0.02483
0.46852	0.07671	0.46852	0.06519	0.14106	0.02487
0.46838	0.07684	0.46838	0.06533	0.14025	0.02487
0.46764	0.07698	0.46764	0.06546	0.14042	0.02487
0.47089	0.07721	0.47089	0.06569	0.1409	0.02492
0.47293	0.07739	0.47293	0.06588	0.14152	0.02497
0.47954	0.07767	0.47954	0.06615	0.14052	0.02497
0.48108	0.07781	0.48108	0.06629	0.14396	0.02501
0.482	0.07794	0.482	0.06643	0.14273	0.02501
0.48625	0.07822	0.48625	0.0667	0.14403	0.02506
0.48619	0.07831	0.48619	0.06679	0.14353	0.0251
0.48851	0.07859	0.48851	0.06707	0.14464	0.0251
0.49288	0.07877	0.49288	0.06725	0.14538	0.02515
0.51395	0.079	0.51395	0.06748	0.14493	0.02519
0.52964	0.07914	0.52964	0.06762	0.14698	0.02524
0.54494	0.07927	0.54494	0.06776	0.14599	0.02524
0.56203	0.07946	0.56203	0.06794	0.14736	0.02524
0.56659	0.07955	0.56659	0.06803	0.14711	0.02529
0.57254	0.07969	0.57254	0.06817	0.14875	0.02533
0.58122	0.07987	0.58122	0.06835	0.14873	0.02533
0.58172	0.07996	0.58172	0.06845	0.14878	0.02538
0.58311	0.08015	0.58311	0.06863	0.14978	0.02542
0.58213	0.08024	0.58213	0.06872	0.15028	0.02547
0.58629	0.08042	0.58629	0.0689	0.15039	0.02551
0.58829	0.08051	0.58829	0.069	0.15043	0.02551
0.59075	0.08061	0.59075	0.06909	0.15006	0.02556
0.59357	0.08079	0.59357	0.06927	0.15076	0.02561
0.59056	0.08088	0.59056	0.06936	0.15171	0.02561
0.59214	0.08097	0.59214	0.06946	0.15271	0.02565
0.58994	0.08116	0.58994	0.06964	0.15261	0.0257
0.5879	0.08125	0.5879	0.06973	0.15332	0.02574
0.58713	0.08148	0.58713	0.06996	0.1546	0.02579
0.58676	0.08157	0.58676	0.07005	0.15496	0.02579
0.58296	0.08175	0.58296	0.07023	0.15592	0.02588
0.58006	0.08184	0.58006	0.07033	0.15581	0.02588
0.5771	0.08198	0.5771	0.07046	0.15679	0.02597
0.57576	0.08216	0.57576	0.07065	0.15702	0.02597
0.57555	0.08226	0.57555	0.07074	0.15845	0.02602
0.57013	0.08239	0.57013	0.07088	0.15931	0.02606
0.56992	0.08258	0.56992	0.07106	0.16126	0.02611
0.56375	0.08272	0.56375	0.0712	0.16104	0.02615
0.5475	0.08294	0.5475	0.07143	0.16039	0.0262
0.53944	0.08304	0.53944	0.07152	0.16167	0.02624
0.53023	0.08331	0.53023	0.07179	0.16308	0.02629
0.53051	0.08345	0.53051	0.07193	0.16322	0.02634
0.5321	0.08354	0.5321	0.07202	0.16229	0.02638
0.5254	0.08386	0.5254	0.07234	0.16236	0.02643
0.52446	0.084	0.52446	0.07248	0.16385	0.02647
0.52562	0.08423	0.52562	0.07271	0.16428	0.02652
0.53003	0.08441	0.53003	0.0729	0.16478	0.02656
0.53954	0.08464	0.53954	0.07312	0.16571	0.02661
0.54661	0.08483	0.54661	0.07331	0.16671	0.02666
0.54929	0.08496	0.54929	0.07345	0.16577	0.0267
0.55855	0.08519	0.55855	0.07368	0.1667	0.02679
0.56413	0.08533	0.56413	0.07381	0.16796	0.02679
0.56978	0.08561	0.56978	0.07409	0.16981	0.02684
0.57228	0.0857	0.57228	0.07418	0.16917	0.02693
0.57187	0.08583	0.57187	0.07432	0.17034	0.02698
0.57554	0.08611	0.57554	0.07459	0.17301	0.02702
0.57215	0.08625	0.57215	0.07473	0.172	0.02707
0.56932	0.08648	0.56932	0.07496	0.17043	0.02711
0.57572	0.08661	0.57572	0.0751	0.17334	0.02716
0.58498	0.08684	0.58498	0.07533	0.17539	0.0272
0.58874	0.08698	0.58874	0.07546	0.17664	0.0273
0.59124	0.08712	0.59124	0.0756	0.17817	0.02734
0.59508	0.08739	0.59508	0.07588	0.18023	0.02739
0.59441	0.08749	0.59441	0.07597	0.18136	0.02748
0.59401	0.08762	0.59401	0.07611	0.18041	0.02748
0.59094	0.0879	0.59094	0.07638	0.1847	0.02757
0.59191	0.08799	0.59191	0.07647	0.18466	0.02762
0.59182	0.08827	0.59182	0.07675	0.18418	0.02766
0.59571	0.0884	0.59571	0.07689	0.18699	0.02775
0.60037	0.08863	0.60037	0.07712	0.18493	0.02775
0.60359	0.08877	0.60359	0.07725	0.18474	0.0278
0.60073	0.08891	0.60073	0.07739	0.1853	0.02789
0.61008	0.08909	0.61008	0.07757	0.18655	0.02793
0.61665	0.08923	0.61665	0.07771	0.18332	0.02803
0.6179	0.08937	0.6179	0.07785	0.18608	0.02807
0.61496	0.08964	0.61496	0.07812	0.18718	0.02816
0.61494	0.08973	0.61494	0.07822	0.18811	0.02821
0.60778	0.09001	0.60778	0.07849	0.18899	0.02825
0.60181	0.09015	0.60181	0.07863	0.18841	0.02835
0.59768	0.09038	0.59768	0.07886	0.18908	0.02835
0.59353	0.09051	0.59353	0.079	0.19047	0.02848
0.59262	0.09065	0.59262	0.07913	0.19092	0.02853
0.58668	0.09088	0.58668	0.07936	0.19189	0.02853
0.58287	0.09106	0.58287	0.07955	0.19366	0.02862
0.57129	0.09138	0.57129	0.07987	0.19366	0.02871
0.56642	0.09148	0.56642	0.07996	0.19344	0.02876
0.5648	0.09166	0.5648	0.08014	0.19513	0.0288
0.56941	0.09198	0.56941	0.08046	0.19643	0.02889
0.56624	0.09212	0.56624	0.0806	0.19716	0.02898
0.57075	0.09244	0.57075	0.08092	0.19887	0.02903
0.57332	0.09262	0.57332	0.08111	0.20097	0.02912
0.57394	0.09276	0.57394	0.08124	0.20248	0.02917
0.57759	0.09313	0.57759	0.08161	0.20231	0.02921
0.58094	0.09331	0.58094	0.08179	0.2011	0.0293
0.58596	0.09359	0.58596	0.08207	0.20289	0.02935
0.58861	0.09377	0.58861	0.08225	0.20394	0.0294
0.59389	0.09405	0.59389	0.08253	0.20274	0.02949
0.59982	0.09423	0.59982	0.08271	0.20273	0.02953
0.60445	0.09437	0.60445	0.08285	0.20197	0.02967
0.60228	0.09469	0.60228	0.08317	0.20312	0.02972
0.598	0.09483	0.598	0.08331	0.2042	0.02976
0.60279	0.09515	0.60279	0.08363	0.20492	0.02985
0.6022	0.09528	0.6022	0.08377	0.20622	0.0299
0.60292	0.09547	0.60292	0.08395	0.20652	0.03003
0.60158	0.09579	0.60158	0.08427	0.20704	0.03008
0.60405	0.09597	0.60405	0.08446	0.20752	0.03013
0.6108	0.09625	0.6108	0.08473	0.208	0.03022
0.61383	0.09643	0.61383	0.08491	0.21125	0.03026
0.61852	0.09671	0.61852	0.08519	0.21134	0.0304
0.61799	0.09689	0.61799	0.08537	0.21187	0.03045
0.61841	0.09703	0.61841	0.08551	0.21525	0.03049
0.6221	0.09739	0.6221	0.08588	0.21406	0.03063
0.62338	0.09749	0.62338	0.08597	0.21592	0.03067
0.62583	0.09767	0.62583	0.08615	0.21586	0.03077
0.63004	0.09799	0.63004	0.08647	0.21693	0.03086
0.63141	0.09808	0.63141	0.08657	0.21864	0.0309
0.63996	0.09845	0.63996	0.08693	0.2194	0.03099
0.64395	0.09859	0.64395	0.08707	0.22094	0.03104
0.64957	0.09886	0.64957	0.08735	0.22255	0.03118
0.65392	0.099	0.65392	0.08748	0.22498	0.03122
0.65332	0.09918	0.65332	0.08767	0.22387	0.03127
0.65461	0.09941	0.65461	0.0879	0.22502	0.0314
0.65583	0.0996	0.65583	0.08808	0.22381	0.03145
0.65825	0.09987	0.65825	0.08835	0.22511	0.03159
0.66353	0.10006	0.66353	0.08854	0.22553	0.03163
0.66724	0.10015	0.66724	0.08863	0.22516	0.03172
0.67341	0.10047	0.67341	0.08895	0.22732	0.03182
0.66925	0.10061	0.66925	0.08909	0.22745	0.03186
0.66989	0.10083	0.66989	0.08932	0.22963	0.032
0.66757	0.10102	0.66757	0.0895	0.22902	0.03204
0.6642	0.10116	0.6642	0.08964	0.2314	0.03218
0.6613	0.10143	0.6613	0.08991	0.2313	0.03223
0.66403	0.10157	0.66403	0.09005	0.2332	0.03227
0.66586	0.10189	0.66586	0.09037	0.23452	0.03241
0.66483	0.10198	0.66483	0.09046	0.23706	0.0325
0.66385	0.10216	0.66385	0.09065	0.23618	0.03259
0.66312	0.10249	0.66312	0.09097	0.23953	0.03268
0.67019	0.10262	0.67019	0.09111	0.23966	0.03273
0.66929	0.1029	0.66929	0.09138	0.24138	0.03287
0.66818	0.10308	0.66818	0.09157	0.24089	0.03291
0.66617	0.10322	0.66617	0.0917	0.24273	0.03305
0.67361	0.1035	0.67361	0.09198	0.24139	0.03314
0.67859	0.10368	0.67859	0.09216	0.24211	0.03319
0.68298	0.104	0.68298	0.09248	0.24029	0.03332
0.68553	0.10409	0.68553	0.09257	0.2409	0.03337
0.68428	0.10428	0.68428	0.09276	0.23922	0.03351
0.6861	0.1046	0.6861	0.09308	0.24182	0.0336
0.68781	0.10469	0.68781	0.09317	0.24256	0.03364
0.68929	0.10501	0.68929	0.09349	0.24631	0.03378
0.68624	0.10519	0.68624	0.09368	0.24283	0.03382
0.68777	0.10547	0.68777	0.09395	0.24637	0.03401
0.68939	0.10561	0.68939	0.09409	0.24259	0.03405
0.69199	0.10579	0.69199	0.09427	0.24586	0.0341
0.69529	0.10606	0.69529	0.09455	0.24597	0.03428
0.69454	0.1062	0.69454	0.09468	0.25029	0.03433
0.69094	0.10638	0.69094	0.09487	0.24902	0.03446
0.69572	0.10671	0.69572	0.09519	0.24845	0.03456
0.69372	0.1068	0.69372	0.09528	0.24885	0.03465
0.68975	0.10716	0.68975	0.09565	0.25092	0.03478
0.69194	0.1073	0.69194	0.09579	0.25197	0.03483
0.69769	0.10758	0.69769	0.09606	0.25316	0.03501
0.70239	0.10776	0.70239	0.09624	0.25601	0.03506
0.7002	0.10794	0.7002	0.09643	0.25297	0.03515
0.69837	0.10822	0.69837	0.0967	0.25381	0.03529
0.70038	0.1084	0.70038	0.09689	0.25401	0.03538
0.70441	0.10854	0.70441	0.09702	0.25764	0.03547
0.70731	0.10882	0.70731	0.0973	0.25997	0.03561
0.70696	0.109	0.70696	0.09748	0.26111	0.03565
0.71335	0.10932	0.71335	0.0978	0.26288	0.03583
0.71299	0.1095	0.71299	0.09799	0.26185	0.03593
0.71778	0.10978	0.71778	0.09826	0.26373	0.03597
0.72106	0.10996	0.72106	0.09845	0.26138	0.03611
0.72029	0.1101	0.72029	0.09858	0.26181	0.0362
0.72199	0.11038	0.72199	0.09886	0.26321	0.03634
0.72332	0.11056	0.72332	0.09904	0.2587	0.03643
0.72301	0.11074	0.72301	0.09923	0.26243	0.03652
0.72051	0.11102	0.72051	0.0995	0.25753	0.03666
0.72146	0.11116	0.72146	0.09964	0.25945	0.03675
0.72052	0.11152	0.72052	0.10001	0.26078	0.03693
0.72138	0.11161	0.72138	0.1001	0.25811	0.03698
0.72441	0.11198	0.72441	0.10046	0.25921	0.03716
0.72047	0.11216	0.72047	0.10065	0.26483	0.03725
0.71564	0.1123	0.71564	0.10079	0.26315	0.03734
0.72168	0.11262	0.72168	0.10111	0.26655	0.03752
0.72594	0.11281	0.72594	0.10129	0.26809	0.03762
0.73157	0.11294	0.73157	0.10143	0.26995	0.03771
0.7432	0.11327	0.7432	0.10175	0.27288	0.03784
0.74708	0.1134	0.74708	0.10189	0.27125	0.03793
0.75111	0.11377	0.75111	0.10225	0.27149	0.03812
0.75362	0.11391	0.75362	0.10239	0.27504	0.03821
0.76158	0.11418	0.76158	0.10267	0.27516	0.03825
0.76299	0.11437	0.76299	0.10285	0.27567	0.03844
0.76166	0.1145	0.76166	0.10299	0.28066	0.03853
0.7647	0.11478	0.7647	0.10326	0.28041	0.03871
0.76591	0.11492	0.76591	0.1034	0.27294	0.0388
0.76764	0.1151	0.76764	0.10358	0.27236	0.03889
0.77008	0.11542	0.77008	0.10391	0.27679	0.03908
0.77173	0.11551	0.77173	0.104	0.27782	0.03912
0.77597	0.11583	0.77597	0.10432	0.27804	0.0393
0.77946	0.11597	0.77946	0.10446	0.27963	0.0394
0.77955	0.11616	0.77955	0.10464	0.28132	0.03953
0.77817	0.11638	0.77817	0.10487	0.28549	0.03967
0.77753	0.11657	0.77753	0.10505	0.28327	0.03976
0.78126	0.11689	0.78126	0.10537	0.28296	0.03994
0.78367	0.11698	0.78367	0.10546	0.28703	0.04003
0.78596	0.11712	0.78596	0.1056	0.28368	0.04013
0.78876	0.11744	0.78876	0.10592	0.28987	0.04031
0.78943	0.11753	0.78943	0.10601	0.29088	0.0404
0.79699	0.11785	0.79699	0.10634	0.29191	0.04058
0.7995	0.11804	0.7995	0.10652	0.29056	0.04067
0.80317	0.11827	0.80317	0.10675	0.29511	0.04077
0.80496	0.11845	0.80496	0.10693	0.29759	0.04095
0.8059	0.11859	0.8059	0.10707	0.29618	0.04104
0.80975	0.11882	0.80975	0.1073	0.29734	0.04122
0.81293	0.119	0.81293	0.10748	0.2975	0.04131
0.81329	0.11914	0.81329	0.10762	0.29573	0.0414
0.81278	0.11941	0.81278	0.1079	0.29716	0.04159
0.81645	0.1195	0.81645	0.10799	0.30311	0.04168
0.822	0.11983	0.822	0.10831	0.30206	0.04191
0.82634	0.11996	0.82634	0.10845	0.30639	0.042
0.83372	0.12019	0.83372	0.10868	0.30749	0.04204
0.83439	0.12038	0.83439	0.10886	0.30657	0.04227
0.83972	0.12051	0.83972	0.109	0.30875	0.04236
0.84724	0.12074	0.84724	0.10923	0.30302	0.04255
0.85009	0.12088	0.85009	0.10936	0.30097	0.04264
0.85443	0.12102	0.85443	0.1095	0.30358	0.04273
0.85753	0.12125	0.85753	0.10973	0.30405	0.04291
0.8619	0.12139	0.8619	0.10987	0.30338	0.043
0.86597	0.12161	0.86597	0.1101	0.30298	0.04323
0.86502	0.12175	0.86502	0.11023	0.30506	0.04332
0.8628	0.12198	0.8628	0.11046	0.30808	0.04351
0.86606	0.12212	0.86606	0.1106	0.30843	0.04364
0.87232	0.12226	0.87232	0.11074	0.30622	0.04373
0.8793	0.12244	0.8793	0.11092	0.30624	0.04392
0.88239	0.12258	0.88239	0.11106	0.30861	0.04405
0.88211	0.12285	0.88211	0.11134	0.30839	0.04414
0.88104	0.12294	0.88104	0.11143	0.31045	0.04433
0.88543	0.12304	0.88543	0.11152	0.31282	0.04442
0.89599	0.12331	0.89599	0.11179	0.3092	0.04465
0.89857	0.1234	0.89857	0.11189	0.31186	0.04478
0.89996	0.12363	0.89996	0.11212	0.31206	0.04483
0.9018	0.12377	0.9018	0.11225	0.31394	0.04506
0.89831	0.12386	0.89831	0.11235	0.3145	0.04519
0.90108	0.12409	0.90108	0.11257	0.31118	0.04538
0.9005	0.12418	0.9005	0.11267	0.3147	0.04551
0.90518	0.12441	0.90518	0.1129	0.31521	0.04561
0.90427	0.1245	0.90427	0.11299	0.3192	0.04583
0.90311	0.12464	0.90311	0.11312	0.31834	0.04593
0.90502	0.12492	0.90502	0.1134	0.32329	0.04615
0.90735	0.12496	0.90735	0.11345	0.3272	0.04629
0.90059	0.12524	0.90059	0.11372	0.33033	0.04638
0.90511	0.12538	0.90511	0.11386	0.33422	0.04661
0.90252	0.12547	0.90252	0.11395	0.33285	0.0467
0.90101	0.1257	0.90101	0.11418	0.33382	0.04684
0.8971	0.12583	0.8971	0.11432	0.33293	0.04707
0.90113	0.12606	0.90113	0.11455	0.33664	0.04711
0.90399	0.1262	0.90399	0.11468	0.34006	0.04734
0.90385	0.12634	0.90385	0.11482	0.34203	0.04748
0.89482	0.12652	0.89482	0.11501	0.33149	0.04766
0.89271	0.12666	0.89271	0.11514	0.32874	0.04775
0.89671	0.12694	0.89671	0.11542	0.33341	0.04789
0.90336	0.12707	0.90336	0.11556	0.33954	0.04812
0.90968	0.12735	0.90968	0.11583	0.34254	0.04821
0.9069	0.12749	0.9069	0.11597	0.34028	0.0483
0.90693	0.12762	0.90693	0.11611	0.34359	0.04853
0.90532	0.12781	0.90532	0.11629	0.34806	0.04862
0.90817	0.12794	0.90817	0.11643	0.34845	0.04885
0.91257	0.12813	0.91257	0.11661	0.34952	0.04898
0.91854	0.12836	0.91854	0.11684	0.35211	0.04917
0.9198	0.12849	0.9198	0.11698	0.35288	0.0493
0.92511	0.12872	0.92511	0.11721	0.35415	0.0494
0.9302	0.12886	0.9302	0.11734	0.35576	0.04962
0.93118	0.12895	0.93118	0.11744	0.35958	0.04972
0.94041	0.12923	0.94041	0.11771	0.35976	0.04985
0.9327	0.12937	0.9327	0.11785	0.36375	0.05008
0.9311	0.12964	0.9311	0.11812	0.36484	0.05017
0.93167	0.12973	0.93167	0.11822	0.36718	0.0504
0.93268	0.12983	0.93268	0.11831	0.36781	0.05049
0.93526	0.1301	0.93526	0.11858	0.36902	0.05072
0.93799	0.13024	0.93799	0.11872	0.37144	0.05081
0.93941	0.13047	0.93941	0.11895	0.36996	0.05095
0.93615	0.13061	0.93615	0.11909	0.37127	0.05113
0.93712	0.13074	0.93712	0.11923	0.37	0.05127
0.93772	0.13097	0.93772	0.11946	0.37083	0.05136
0.94515	0.13111	0.94515	0.11959	0.36976	0.05159
0.94813	0.13139	0.94813	0.11987	0.37338	0.05168
0.94859	0.13148	0.94859	0.11996	0.37352	0.05195
0.94389	0.13161	0.94389	0.1201	0.37775	0.05204
0.93699	0.13189	0.93699	0.12037	0.38009	0.05227
0.93687	0.13198	0.93687	0.12046	0.3819	0.05236
0.94121	0.13226	0.94121	0.12074	0.38378	0.0525
0.94957	0.13239	0.94957	0.12088	0.3847	0.05268
0.9552	0.13253	0.9552	0.12102	0.38803	0.05282
0.96	0.13276	0.96	0.12124	0.38734	0.05296
0.96527	0.1329	0.96527	0.12138	0.39223	0.05314
0.96885	0.13313	0.96885	0.12161	0.39322	0.05323
0.9718	0.13327	0.9718	0.12175	0.39652	0.0535
0.97459	0.1334	0.97459	0.12189	0.39787	0.05355
0.98043	0.13363	0.98043	0.12212	0.40078	0.05383
0.97981	0.13372	0.97981	0.12221	0.4032	0.05392
0.98433	0.134	0.98433	0.12248	0.40492	0.05405
0.98499	0.13409	0.98499	0.12257	0.40679	0.05424
0.98786	0.13418	0.98786	0.12267	0.40731	0.05437
0.98782	0.13446	0.98782	0.12294	0.41108	0.05456
0.9898	0.1346	0.9898	0.12308	0.41469	0.05465
0.98961	0.13478	0.98961	0.12326	0.41531	0.05478
0.99474	0.13492	0.99474	0.1234	0.41679	0.05501
0.99355	0.13505	0.99355	0.12354	0.41576	0.0551
0.99668	0.13524	0.99668	0.12372	0.42093	0.05533
0.99577	0.13538	0.99577	0.12386	0.42039	0.05542
0.99493	0.13565	0.99493	0.12413	0.42052	0.05551
0.99386	0.13574	0.99386	0.12423	0.42227	0.05574
0.99507	0.13597	0.99507	0.12446	0.42425	0.05588
0.99591	0.13611	0.99591	0.12459	0.42614	0.05606
1.00015	0.13625	1.00015	0.12473	0.42534	0.05615
1.00182	0.13648	1.00182	0.12496	0.42753	0.05629
1.00318	0.13657	1.00318	0.12505	0.42918	0.05647
1.00307	0.13671	1.00307	0.12519	0.42766	0.05661
1.00436	0.13694	1.00436	0.12542	0.42831	0.05684
1.00502	0.13707	1.00502	0.12556	0.42875	0.05698
1.00606	0.13735	1.00606	0.12583	0.42969	0.05707
1.00746	0.13744	1.00746	0.12592	0.43001	0.05729
1.01377	0.13767	1.01377	0.12615	0.43182	0.05743
1.01296	0.13781	1.01296	0.12629	0.43085	0.05762
1.01251	0.13794	1.01251	0.12643	0.43475	0.05775
1.01219	0.13817	1.01219	0.12666	0.43296	0.05784
1.01482	0.13831	1.01482	0.12679	0.43739	0.05807
1.02261	0.13849	1.02261	0.12698	0.43638	0.05816
1.02513	0.13863	1.02513	0.12712	0.43609	0.05844
1.0291	0.13877	1.0291	0.12725	0.43553	0.05853
1.03155	0.13905	1.03155	0.12753	0.43712	0.05876
1.03334	0.13914	1.03334	0.12762	0.4365	0.05889
1.03131	0.13937	1.03131	0.12785	0.43543	0.05903
1.03597	0.1395	1.03597	0.12799	0.43473	0.05921
1.03609	0.1396	1.03609	0.12808	0.43647	0.05935
1.04246	0.13983	1.04246	0.12831	0.43902	0.05958
1.04219	0.13996	1.04219	0.12845	0.43955	0.05972
1.04848	0.14019	1.04848	0.12868	0.43943	0.05985
1.05108	0.14028	1.05108	0.12877	0.44218	0.06008
1.05317	0.14042	1.05317	0.1289	0.44085	0.06017
1.05414	0.14065	1.05414	0.12913	0.44231	0.06045
1.05637	0.14074	1.05637	0.12923	0.44298	0.06058
1.05482	0.14102	1.05482	0.1295	0.44577	0.06067
1.04874	0.14116	1.04874	0.12964	0.44645	0.06095
1.04447	0.1412	1.04447	0.12968	0.44987	0.06108
1.04794	0.14148	1.04794	0.12996	0.45201	0.06127
1.05183	0.14161	1.05183	0.1301	0.454	0.0614
1.05464	0.14184	1.05464	0.13033	0.45597	0.06154
1.03819	0.14194	1.03819	0.13042	0.46152	0.06182
1.04532	0.14207	1.04532	0.13056	0.46613	0.06195
1.05332	0.1423	1.05332	0.13079	0.46595	0.06204
1.06082	0.14244	1.06082	0.13092	0.4738	0.06227
1.06623	0.14272	1.06623	0.1312	0.4748	0.06241
1.07204	0.14281	1.07204	0.13129	0.47854	0.06264
1.07498	0.1429	1.07498	0.13138	0.47797	0.06277
1.08211	0.14317	1.08211	0.13166	0.48223	0.06287
1.08524	0.14327	1.08524	0.13175	0.48004	0.06314
1.08939	0.14349	1.08939	0.13198	0.48196	0.06323
1.08878	0.14359	1.08878	0.13207	0.48492	0.06346
1.09341	0.14382	1.09341	0.1323	0.49028	0.0636
1.09641	0.14391	1.09641	0.13239	0.49013	0.06373
1.09583	0.14405	1.09583	0.13253	0.49527	0.06392
1.10022	0.14427	1.10022	0.13276	0.49809	0.06405
1.09894	0.14437	1.09894	0.13285	0.50185	0.06424
1.10231	0.1445	1.10231	0.13299	0.50475	0.06437
1.10408	0.14473	1.10408	0.13322	0.50893	0.06451
1.10851	0.14478	1.10851	0.13326	0.51068	0.06474
1.11056	0.14505	1.11056	0.13354	0.51366	0.06483
1.1127	0.14515	1.1127	0.13363	0.51927	0.06506
1.11669	0.14533	1.11669	0.13381	0.52169	0.06519
1.11837	0.14547	1.11837	0.13395	0.52196	0.06529
1.12254	0.14556	1.12254	0.13404	0.52411	0.06551
1.1259	0.14574	1.1259	0.13423	0.52752	0.06565
1.12763	0.14588	1.12763	0.13436	0.52688	0.06583
1.12847	0.14597	1.12847	0.13446	0.53135	0.06593
1.13148	0.1462	1.13148	0.13468	0.53177	0.06606
1.13362	0.14629	1.13362	0.13478	0.53177	0.06624
1.13213	0.14652	1.13213	0.13501	0.53304	0.06638
1.13535	0.14661	1.13535	0.1351	0.53471	0.06661
1.13544	0.1468	1.13544	0.13528	0.53763	0.06675
1.13338	0.14694	1.13338	0.13542	0.5406	0.06693
1.13913	0.14703	1.13913	0.13551	0.54344	0.06702
1.13828	0.14721	1.13828	0.13569	0.54195	0.06716
1.13761	0.14735	1.13761	0.13583	0.54558	0.06734
1.13992	0.14758	1.13992	0.13606	0.55121	0.06748
1.13687	0.14762	1.13687	0.13611	0.55478	0.06757
1.13757	0.14776	1.13757	0.13624	0.55913	0.0678
1.12791	0.14799	1.12791	0.13647	0.55748	0.06789
1.1299	0.14813	1.1299	0.13661	0.5513	0.06812
1.12978	0.14831	1.12978	0.13679	0.54902	0.06821
1.1327	0.14845	1.1327	0.13693	0.54683	0.06839
1.13321	0.14854	1.13321	0.13702	0.5509	0.06853
1.14082	0.14877	1.14082	0.13725	0.55014	0.06867
1.14749	0.14886	1.14749	0.13734	0.5531	0.06885
1.14455	0.14914	1.14455	0.13762	0.55068	0.06898
1.15166	0.14918	1.15166	0.13767	0.54866	0.06917
1.15349	0.14932	1.15349	0.1378	0.5513	0.0693
1.1628	0.14955	1.1628	0.13803	0.554	0.0694
1.16206	0.14969	1.16206	0.13817	0.55545	0.06967
1.16257	0.14987	1.16257	0.13835	0.55706	0.06976
1.16387	0.14996	1.16387	0.13845	0.56754	0.06999
1.16549	0.1501	1.16549	0.13858	0.56959	0.07013
1.16848	0.15028	1.16848	0.13877	0.57176	0.07022
1.16827	0.15038	1.16827	0.13886	0.57415	0.07045
1.17409	0.15051	1.17409	0.139	0.57725	0.07058
1.17526	0.15074	1.17526	0.13923	0.57997	0.07077
1.17973	0.15083	1.17973	0.13932	0.57971	0.0709
1.18251	0.15106	1.18251	0.13955	0.57882	0.07099
1.18139	0.15116	1.18139	0.13964	0.57841	0.07118
1.18361	0.15134	1.18361	0.13982	0.57739	0.07131
1.18358	0.15148	1.18358	0.13996	0.57795	0.07154
1.18498	0.15157	1.18498	0.14005	0.58083	0.07168
1.18893	0.1518	1.18893	0.14028	0.57671	0.07172
1.18676	0.15189	1.18676	0.14037	0.5759	0.072
1.19132	0.15198	1.19132	0.14046	0.57447	0.07209
1.19443	0.15221	1.19443	0.14069	0.57429	0.07232
1.19563	0.1523	1.19563	0.14079	0.57632	0.07241
1.19924	0.15253	1.19924	0.14102	0.57795	0.07255
1.19746	0.15262	1.19746	0.14111	0.5814	0.07277
1.19655	0.15281	1.19655	0.14129	0.58154	0.07287
1.19727	0.15294	1.19727	0.14143	0.57822	0.07314
1.19777	0.15304	1.19777	0.14152	0.58064	0.07323
1.1982	0.15322	1.1982	0.1417	0.58006	0.07337
1.19698	0.15336	1.19698	0.14184	0.58106	0.0736
1.19994	0.15359	1.19994	0.14207	0.58138	0.07373
1.19629	0.15368	1.19629	0.14216	0.58615	0.07396
1.19889	0.15377	1.19889	0.14225	0.58925	0.0741
1.20307	0.154	1.20307	0.14248	0.5912	0.07424
1.20386	0.15414	1.20386	0.14262	0.59633	0.07446
1.21101	0.15432	1.21101	0.1428	0.6022	0.07456
1.21032	0.15441	1.21032	0.1429	0.60781	0.07483
1.21516	0.15455	1.21516	0.14303	0.61483	0.07497
1.21854	0.15473	1.21854	0.14322	0.61799	0.07506
1.21782	0.15487	1.21782	0.14335	0.62456	0.07529
1.2209	0.1551	1.2209	0.14358	0.62273	0.07542
1.22076	0.15515	1.22076	0.14363	0.6231	0.07561
1.22783	0.15528	1.22783	0.14377	0.62085	0.07574
1.23042	0.15551	1.23042	0.144	0.62527	0.07583
1.23279	0.15561	1.23279	0.14409	0.62417	0.07611
1.23492	0.15579	1.23492	0.14427	0.62752	0.07615
1.23418	0.15593	1.23418	0.14441	0.62908	0.07643
1.23975	0.15602	1.23975	0.1445	0.62873	0.07652
1.24228	0.1562	1.24228	0.14468	0.62711	0.07666
1.2394	0.15634	1.2394	0.14482	0.62627	0.07684
1.24009	0.15652	1.24009	0.14501	0.6295	0.07698
1.2392	0.15661	1.2392	0.1451	0.63562	0.07716
1.24144	0.15671	1.24144	0.14519	0.64138	0.0773
1.24396	0.15694	1.24396	0.14542	0.64197	0.07743
1.24227	0.15703	1.24227	0.14551	0.64237	0.07766
1.24641	0.15726	1.24641	0.14574	0.63683	0.07775
1.24492	0.15735	1.24492	0.14583	0.6372	0.07798
1.25064	0.15749	1.25064	0.14597	0.6358	0.07812
1.2521	0.15767	1.2521	0.14615	0.63829	0.07816
1.25166	0.15776	1.25166	0.14624	0.64129	0.07844
1.25349	0.15794	1.25349	0.14643	0.64634	0.07853
1.25531	0.15808	1.25531	0.14657	0.64987	0.07876
1.25968	0.15817	1.25968	0.14666	0.65042	0.07889
1.26454	0.1584	1.26454	0.14689	0.65059	0.07898
1.26373	0.1585	1.26373	0.14698	0.65225	0.07921
1.27124	0.15872	1.27124	0.14721	0.65441	0.0793
1.27256	0.15882	1.27256	0.1473	0.65457	0.07958
1.27694	0.159	1.27694	0.14748	0.65576	0.07967
1.28349	0.15909	1.28349	0.14757	0.65294	0.07976
1.28404	0.15923	1.28404	0.14771	0.6579	0.07999
1.2893	0.15941	1.2893	0.1479	0.65544	0.08013
1.29487	0.1595	1.29487	0.14799	0.65566	0.08035
1.29357	0.1596	1.29357	0.14808	0.65307	0.08045
1.29631	0.15978	1.29631	0.14826	0.65468	0.08058
1.2987	0.15987	1.2987	0.14835	0.65096	0.08081
1.30124	0.16006	1.30124	0.14854	0.65213	0.08095
1.30335	0.16019	1.30335	0.14868	0.63736	0.08118
1.30676	0.16033	1.30676	0.14881	0.64018	0.08127
1.30949	0.16047	1.30949	0.14895	0.64	0.0814
1.30801	0.16056	1.30801	0.14904	0.64603	0.08168
1.3091	0.1607	1.3091	0.14918	0.64675	0.08182
1.31025	0.16083	1.31025	0.14932	0.64962	0.08204
1.31204	0.16093	1.31204	0.14941	0.6531	0.08218
1.31117	0.16111	1.31117	0.14959	0.62878	0.08241
1.30972	0.1612	1.30972	0.14968	0.62927	0.08259
1.31228	0.16139	1.31228	0.14987	0.63169	0.08273
1.31446	0.16148	1.31446	0.14996	0.63092	0.083
1.31442	0.16166	1.31442	0.15014	0.6341	0.08314
1.31369	0.1618	1.31369	0.15028	0.63652	0.08328
1.31707	0.16189	1.31707	0.15037	0.64201	0.0836
1.3194	0.16207	1.3194	0.15056	0.64752	0.08369
1.3191	0.16216	1.3191	0.15065	0.65024	0.08401
1.32171	0.16235	1.32171	0.15083	0.65088	0.08414
1.32506	0.16244	1.32506	0.15092	0.64711	0.08442
1.32575	0.16253	1.32575	0.15102	0.64725	0.08456
1.33348	0.16276	1.33348	0.15124	0.64417	0.08474
1.33702	0.16281	1.33702	0.15129	0.64792	0.08497
1.34129	0.16299	1.34129	0.15147	0.65092	0.08515
1.34457	0.16313	1.34457	0.15161	0.64819	0.08547
1.34418	0.16317	1.34418	0.15166	0.6488	0.08561
1.34423	0.16336	1.34423	0.15184	0.65225	0.0857
1.34266	0.1635	1.34266	0.15198	0.65575	0.08602
1.34371	0.16363	1.34371	0.15212	0.65468	0.0862
1.34823	0.16372	1.34823	0.15221	0.66168	0.08643
1.34922	0.16386	1.34922	0.15234	0.66308	0.08661
1.34976	0.164	1.34976	0.15248	0.66447	0.08675
1.35293	0.16409	1.35293	0.15257	0.66451	0.08702
1.35846	0.16432	1.35846	0.1528	0.66814	0.0872
1.3595	0.16441	1.3595	0.1529	0.67404	0.08748
1.36071	0.16446	1.36071	0.15294	0.67452	0.08761
1.35336	0.16469	1.35336	0.15317	0.68057	0.08775
1.35343	0.16478	1.35343	0.15326	0.68446	0.08807
1.35748	0.16496	1.35748	0.15345	0.68303	0.08821
1.36152	0.16506	1.36152	0.15354	0.68361	0.08848
1.36419	0.16515	1.36419	0.15363	0.68856	0.08862
1.36696	0.16533	1.36696	0.15381	0.68839	0.08876
1.36429	0.16542	1.36429	0.1539	0.69162	0.08903
1.36689	0.16561	1.36689	0.15409	0.69308	0.08917
1.36991	0.1657	1.36991	0.15418	0.69654	0.08949
1.37162	0.16588	1.37162	0.15436	0.69662	0.08958
1.37411	0.16597	1.37411	0.15446	0.69833	0.08972
1.37762	0.16611	1.37762	0.15459	0.70078	0.09003
1.38303	0.16625	1.38303	0.15473	0.7029	0.09013
1.3838	0.16634	1.3838	0.15482	0.6982	0.09045
1.38062	0.16652	1.38062	0.15501	0.69922	0.09058
1.38422	0.16661	1.38422	0.1551	0.70344	0.09081
1.38334	0.16671	1.38334	0.15519	0.70789	0.09099
1.38804	0.16694	1.38804	0.15542	0.71059	0.09113
1.39264	0.16698	1.39264	0.15546	0.71716	0.09136
1.3982	0.16716	1.3982	0.15565	0.71555	0.0915
1.39613	0.16726	1.39613	0.15574	0.71073	0.09168
1.39775	0.16735	1.39775	0.15583	0.70813	0.092
1.40206	0.16753	1.40206	0.15602	0.71219	0.09209
1.40293	0.16762	1.40293	0.15611	0.72032	0.09241
1.4089	0.16781	1.4089	0.15629	0.72118	0.09255
1.41097	0.1679	1.41097	0.15638	0.71966	0.09282
1.41273	0.16799	1.41273	0.15647	0.71962	0.09296
1.41265	0.16817	1.41265	0.15666	0.71864	0.09314
1.41569	0.16827	1.41569	0.15675	0.71862	0.09337
1.41962	0.16845	1.41962	0.15693	0.71761	0.09351
1.41922	0.16854	1.41922	0.15702	0.71805	0.09369
1.41841	0.16859	1.41841	0.15707	0.72047	0.09392
1.41769	0.16877	1.41769	0.15725	0.72131	0.0941
1.41713	0.16886	1.41713	0.15734	0.7248	0.09442
1.41813	0.16905	1.41813	0.15753	0.72606	0.09456
1.41625	0.16914	1.41625	0.15762	0.73082	0.09483
1.42338	0.16923	1.42338	0.15771	0.73009	0.09497
1.4261	0.16941	1.4261	0.1579	0.73138	0.09515
1.42366	0.1695	1.42366	0.15799	0.73787	0.09538
1.43176	0.16969	1.43176	0.15817	0.73795	0.09556
1.43423	0.16973	1.43423	0.15822	0.7372	0.0957
1.4325	0.16983	1.4325	0.15831	0.73894	0.09597
1.43538	0.17006	1.43538	0.15854	0.74163	0.09611
1.43898	0.17015	1.43898	0.15863	0.7422	0.09643
1.44052	0.17028	1.44052	0.15877	0.7432	0.09652
1.43847	0.17038	1.43847	0.15886	0.74716	0.09684
1.44013	0.17056	1.44013	0.15904	0.74707	0.09698
1.44237	0.17065	1.44237	0.15913	0.74869	0.09716
1.44354	0.17074	1.44354	0.15923	0.7551	0.09739
1.44791	0.17093	1.44791	0.15941	0.74926	0.09757
1.45205	0.17097	1.45205	0.15946	0.75401	0.0978
1.45283	0.17106	1.45283	0.15955	0.75476	0.09798
1.45358	0.17129	1.45358	0.15978	0.75303	0.09812
1.45395	0.17134	1.45395	0.15982	0.75468	0.09844
1.45466	0.17152	1.45466	0.16001	0.75622	0.09853
1.45827	0.17161	1.45827	0.1601	0.76046	0.09885
1.45766	0.1718	1.45766	0.16028	0.75964	0.09898
1.45262	0.17189	1.45262	0.16037	0.75855	0.09912
1.45054	0.17198	1.45054	0.16046	0.76566	0.0994
1.44828	0.17212	1.44828	0.1606	0.76989	0.09958
1.44527	0.17221	1.44527	0.16069	0.77252	0.09985
1.44833	0.17235	1.44833	0.16083	0.77428	0.09999
1.45097	0.17253	1.45097	0.16102	0.77285	0.10013
1.44983	0.17258	1.44983	0.16106	0.76578	0.1004
1.45554	0.17281	1.45554	0.16129	0.76846	0.10054
1.45706	0.1729	1.45706	0.16138	0.77549	0.10086
1.4601	0.17308	1.4601	0.16157	0.77897	0.10104
1.46129	0.17317	1.46129	0.16166	0.78028	0.10113
1.46327	0.17327	1.46327	0.16175	0.78312	0.10145
1.46564	0.1735	1.46564	0.16198	0.78645	0.10159
1.46775	0.17354	1.46775	0.16202	0.79222	0.10186
1.47417	0.17363	1.47417	0.16212	0.79455	0.102
1.47946	0.17386	1.47946	0.16234	0.79727	0.10218
1.48279	0.17395	1.48279	0.16244	0.7995	0.10241
1.48373	0.17409	1.48373	0.16257	0.79929	0.10259
1.48674	0.17418	1.48674	0.16267	0.80241	0.10287
1.48828	0.17427	1.48828	0.16276	0.79883	0.10296
1.48656	0.17446	1.48656	0.16294	0.80125	0.10314
1.48776	0.17455	1.48776	0.16303	0.80451	0.10341
1.49112	0.17473	1.49112	0.16322	0.8031	0.1036
1.4891	0.17483	1.4891	0.16331	0.80752	0.10383
1.48941	0.17492	1.48941	0.1634	0.8105	0.10396
1.48946	0.1751	1.48946	0.16358	0.81037	0.10424
1.49211	0.17519	1.49211	0.16368	0.81113	0.10437
1.49731	0.17538	1.49731	0.16386	0.81103	0.10456
1.49918	0.17547	1.49918	0.16395	0.81301	0.10483
1.49746	0.17556	1.49746	0.16404	0.81247	0.10497
1.50118	0.17574	1.50118	0.16423	0.81833	0.10524
1.50367	0.17583	1.50367	0.16432	0.82242	0.10542
1.50615	0.17602	1.50615	0.1645	0.82214	0.10551
1.50679	0.17606	1.50679	0.16455	0.83104	0.10583
1.50931	0.17616	1.50931	0.16464	0.83456	0.10597
1.51369	0.17639	1.51369	0.16487	0.83627	0.1062
1.5129	0.17648	1.5129	0.16496	0.83999	0.10634
1.51654	0.17661	1.51654	0.1651	0.84208	0.10647
1.51964	0.17671	1.51964	0.16519	0.84665	0.10675
1.52287	0.17689	1.52287	0.16537	0.85032	0.10693
1.52353	0.17698	1.52353	0.16546	0.85264	0.1072
1.52377	0.17707	1.52377	0.16556	0.85345	0.10734
1.52706	0.17726	1.52706	0.16574	0.85805	0.10743
1.52613	0.1773	1.52613	0.16579	0.85735	0.10771
1.52538	0.17744	1.52538	0.16592	0.85524	0.10784
1.52432	0.17762	1.52432	0.16611	0.85708	0.10807
1.52441	0.17767	1.52441	0.16615	0.85654	0.10821
1.52986	0.17785	1.52986	0.16634	0.85901	0.10835
1.53334	0.17794	1.53334	0.16643	0.85662	0.10857
1.53601	0.17813	1.53601	0.16661	0.85684	0.10876
1.53874	0.17822	1.53874	0.1667	0.8501	0.10903
1.53893	0.17831	1.53893	0.16679	0.85251	0.10912
1.54131	0.1785	1.54131	0.16698	0.85619	0.10926
1.54378	0.17859	1.54378	0.16707	0.85741	0.10958
1.54294	0.17868	1.54294	0.16716	0.8611	0.10971
1.54149	0.17886	1.54149	0.16734	0.86749	0.10999
1.54275	0.17891	1.54275	0.16739	0.86561	0.11013
1.5426	0.17914	1.5426	0.16762	0.87025	0.11035
1.54117	0.17923	1.54117	0.16771	0.87527	0.11049
1.54843	0.17937	1.54843	0.16785	0.87177	0.11067
1.55172	0.17946	1.55172	0.16794	0.87553	0.11095
1.55375	0.17955	1.55375	0.16803	0.87868	0.11104
1.55525	0.17973	1.55525	0.16822	0.87997	0.11118
1.55699	0.17983	1.55699	0.16831	0.87946	0.1115
1.55727	0.18001	1.55727	0.16849	0.87934	0.11159
1.55527	0.1801	1.55527	0.16858	0.88408	0.11186
1.55601	0.18019	1.55601	0.16868	0.88311	0.112
1.55957	0.18038	1.55957	0.16886	0.86391	0.11227
1.55981	0.18047	1.55981	0.16895	0.87287	0.11241
1.56294	0.18065	1.56294	0.16913	0.88025	0.11259
1.5653	0.18074	1.5653	0.16923	0.8879	0.11282
1.56465	0.18083	1.56465	0.16932	0.89014	0.11296
1.56209	0.18097	1.56209	0.16946	0.89482	0.11314
1.56395	0.18111	1.56395	0.16959	0.90274	0.11341
1.5686	0.18129	1.5686	0.16978	0.90475	0.1135
1.57038	0.18134	1.57038	0.16982	0.91191	0.11383
1.57129	0.18143	1.57129	0.16991	0.91303	0.11396
1.5782	0.18166	1.5782	0.17014	0.91745	0.11419
1.58057	0.18171	1.58057	0.17019	0.91706	0.11433
1.58569	0.18189	1.58569	0.17037	0.91631	0.11446
1.58759	0.18198	1.58759	0.17046	0.92135	0.11469
1.59096	0.18212	1.59096	0.1706	0.92358	0.11483
1.59535	0.18226	1.59535	0.17074	0.92997	0.1151
1.59623	0.18235	1.59623	0.17083	0.93055	0.11519
1.60197	0.18249	1.60197	0.17097	0.93535	0.11533
1.60303	0.18258	1.60303	0.17106	0.93857	0.11561
1.60296	0.18267	1.60296	0.17115	0.93838	0.11574
1.60303	0.18285	1.60303	0.17134	0.94223	0.11597
1.60603	0.18294	1.60603	0.17143	0.94166	0.11611
1.60752	0.18313	1.60752	0.17161	0.94501	0.1162
1.60576	0.18322	1.60576	0.1717	0.95302	0.11643
1.60259	0.18336	1.60259	0.17184	0.9568	0.11656
1.60334	0.18345	1.60334	0.17193	0.95656	0.11684
1.60697	0.18354	1.60697	0.17202	0.95958	0.11693
1.60981	0.18372	1.60981	0.17221	0.9569	0.11707
1.60876	0.18382	1.60876	0.1723	0.9535	0.11729
1.61079	0.18391	1.61079	0.17239	0.94884	0.11739
1.60887	0.18405	1.60887	0.17253	0.95515	0.11766
1.60725	0.18414	1.60725	0.17262	0.95573	0.1178
1.61	0.18437	1.61	0.17285	0.9493	0.11793
1.61387	0.18446	1.61387	0.17294	0.95149	0.11816
1.62192	0.1846	1.62192	0.17308	0.95455	0.1183
1.62344	0.18469	1.62344	0.17317	0.9582	0.11853
1.6261	0.18478	1.6261	0.17326	0.96059	0.11862
1.62961	0.18496	1.62961	0.17345	0.96321	0.11876
1.6302	0.18506	1.6302	0.17354	0.96567	0.11903
1.63292	0.18515	1.63292	0.17363	0.96884	0.11912
1.6365	0.18528	1.6365	0.17377	0.96693	0.1194
1.64261	0.18538	1.64261	0.17386	0.96697	0.11953
1.6459	0.18556	1.6459	0.17404	0.96567	0.11962
1.64564	0.18565	1.64564	0.17413	0.9675	0.1199
1.64938	0.18579	1.64938	0.17427	0.96958	0.12003
1.65163	0.18588	1.65163	0.17436	0.96711	0.12026
1.65169	0.18597	1.65169	0.17446	0.96967	0.1204
1.65476	0.18616	1.65476	0.17464	0.96845	0.12054
1.65715	0.18625	1.65715	0.17473	0.97197	0.12077
1.65878	0.18638	1.65878	0.17487	0.97373	0.1209
1.66316	0.18648	1.66316	0.17496	0.97675	0.12118
1.66396	0.18657	1.66396	0.17505	0.97851	0.12131
1.66331	0.18671	1.66331	0.17519	0.9747	0.12154
1.66548	0.1868	1.66548	0.17528	0.97743	0.12168
1.6673	0.18698	1.6673	0.17546	0.98118	0.12186
1.67005	0.18707	1.67005	0.17556	0.98446	0.12209
1.67057	0.18712	1.67057	0.1756	0.98841	0.12223
1.67259	0.1873	1.67259	0.17579	0.9892	0.12236
1.67326	0.18739	1.67326	0.17588	0.99228	0.12259
1.67539	0.18753	1.67539	0.17601	0.98866	0.12273
1.67534	0.18762	1.67534	0.17611	0.99148	0.123
1.67297	0.18772	1.67297	0.1762	0.9919	0.12309
1.6718	0.18785	1.6718	0.17634	0.98948	0.12337
1.67183	0.18794	1.67183	0.17643	0.9921	0.1235
1.67524	0.18813	1.67524	0.17661	0.99382	0.12364
1.67659	0.18822	1.67659	0.1767	0.99721	0.12387
1.67946	0.18827	1.67946	0.17675	1.00006	0.12401
1.6755	0.18845	1.6755	0.17693	1.00168	0.12428
1.67535	0.18854	1.67535	0.17702	1.00113	0.12442
1.67552	0.18868	1.67552	0.17716	1.00145	0.12456
1.67731	0.18877	1.67731	0.17725	1.00763	0.12483
1.67538	0.18891	1.67538	0.17739	1.01089	0.12492
1.67729	0.18909	1.67729	0.17757	1.01622	0.12519
1.67833	0.18914	1.67833	0.17762	1.01828	0.12533
1.67945	0.18932	1.67945	0.1778	1.01529	0.12542
1.67666	0.18941	1.67666	0.1779	1.0198	0.1257
1.66995	0.1895	1.66995	0.17799	1.02369	0.12583
1.66246	0.18969	1.66246	0.17817	1.02704	0.12606
1.6653	0.18978	1.6653	0.17826	1.02818	0.1262
1.66761	0.18987	1.66761	0.17835	1.02683	0.12634
1.67092	0.19006	1.67092	0.17854	1.0302	0.12656
1.67096	0.19019	1.67096	0.17868	1.02991	0.1267
1.67171	0.19038	1.67171	0.17886	1.03722	0.12698
1.67064	0.19047	1.67064	0.17895	1.03749	0.12711
1.67637	0.19065	1.67637	0.17913	1.03856	0.1272
1.6798	0.19079	1.6798	0.17927	1.03983	0.12748
1.68497	0.19088	1.68497	0.17936	1.0414	0.12761
1.69139	0.19106	1.69139	0.17955	1.04608	0.12784
1.69372	0.19116	1.69372	0.17964	1.0468	0.12793
1.69661	0.19125	1.69661	0.17973	1.05073	0.12807
1.69963	0.19143	1.69963	0.17991	1.05338	0.1283
1.6998	0.19152	1.6998	0.18001	1.05717	0.12844
1.70279	0.19171	1.70279	0.18019	1.05532	0.12871
1.70392	0.1918	1.70392	0.18028	1.05422	0.1288
1.7055	0.19198	1.7055	0.18046	1.05448	0.12894
1.70745	0.19207	1.70745	0.18056	1.05538	0.12921
1.71015	0.19217	1.71015	0.18065	1.05532	0.12935
1.71154	0.19235	1.71154	0.18083	1.06011	0.12953
1.71118	0.19244	1.71118	0.18092	1.06163	0.12967
1.71316	0.19258	1.71316	0.18106	1.0746	0.1299
1.71726	0.19272	1.71726	0.1812	1.07836	0.13004
1.71655	0.19281	1.71655	0.18129	1.07882	0.13017
1.7169	0.19299	1.7169	0.18147	1.08248	0.13045
1.71698	0.19308	1.71698	0.18157	1.08315	0.13049
1.72129	0.19327	1.72129	0.18175	1.08878	0.13063
1.72205	0.19336	1.72205	0.18184	1.09725	0.1309
1.72694	0.1934	1.72694	0.18189	1.10083	0.13099
1.73482	0.19363	1.73482	0.18212	1.10539	0.13122
1.73573	0.19372	1.73573	0.18221	1.1101	0.13136
1.73963	0.19386	1.73963	0.18234	1.11633	0.13154
1.74111	0.19395	1.74111	0.18244	1.11749	0.13163
1.73964	0.19405	1.73964	0.18253	1.1154	0.13177
1.73783	0.19423	1.73783	0.18271	1.11355	0.13195
1.74129	0.19432	1.74129	0.1828	1.11415	0.13209
1.73814	0.1945	1.73814	0.18299	1.11473	0.13232
1.73769	0.1946	1.73769	0.18308	1.11836	0.13241
1.74215	0.19469	1.74215	0.18317	1.11664	0.1325
1.74242	0.19487	1.74242	0.18335	1.11906	0.13273
1.74566	0.19496	1.74566	0.18345	1.12022	0.13287
1.74753	0.19515	1.74753	0.18363	1.12399	0.13305
1.75121	0.19524	1.75121	0.18372	1.12888	0.13319
1.75201	0.19533	1.75201	0.18381	1.13186	0.13328
1.75437	0.19547	1.75437	0.18395	1.13474	0.13351
1.75659	0.19561	1.75659	0.18409	1.13651	0.1336
1.75894	0.19579	1.75894	0.18427	1.13804	0.13382
1.76233	0.19583	1.76233	0.18432	1.14177	0.13392
1.76313	0.19593	1.76313	0.18441	1.1406	0.13401
1.76931	0.19611	1.76931	0.18459	1.1399	0.13424
1.77283	0.1962	1.77283	0.18468	1.13624	0.13437
1.77963	0.19638	1.77963	0.18487	1.13713	0.13456
1.78037	0.19648	1.78037	0.18496	1.14062	0.13469
1.78651	0.19661	1.78651	0.1851	1.14313	0.13478
1.78989	0.19671	1.78989	0.18519	1.14507	0.13501
1.79237	0.1968	1.79237	0.18528	1.14273	0.1351
1.79799	0.19698	1.79799	0.18546	1.13535	0.13533
1.79949	0.19703	1.79949	0.18551	1.13544	0.13542
1.80361	0.19721	1.80361	0.18569	1.13749	0.13556
1.80689	0.1973	1.80689	0.18579	1.14153	0.13579
1.8054	0.19735	1.8054	0.18583	1.14483	0.13588
1.80683	0.19753	1.80683	0.18601	1.14955	0.13611
1.80746	0.19762	1.80746	0.18611	1.15001	0.13625
1.81223	0.19776	1.81223	0.18624	1.15387	0.13643
1.81479	0.19785	1.81479	0.18634	1.15539	0.13656
1.8147	0.19794	1.8147	0.18643	1.15403	0.1367
1.8173	0.19808	1.8173	0.18657	1.15485	0.13688
1.818	0.19817	1.818	0.18666	1.15715	0.13702
1.81748	0.19831	1.81748	0.18679	1.15603	0.13711
1.81971	0.1984	1.81971	0.18689	1.16157	0.13739
1.81989	0.19845	1.81989	0.18693	1.16335	0.13743
1.82562	0.19863	1.82562	0.18712	1.17228	0.13771
1.82838	0.19872	1.82838	0.18721	1.17597	0.1378
1.83176	0.19886	1.83176	0.18734	1.1792	0.13803
1.83257	0.19895	1.83257	0.18744	1.18083	0.13812
1.83259	0.19905	1.83259	0.18753	1.18025	0.13825
1.83259	0.19918	1.83259	0.18767	1.18417	0.13844
1.83297	0.19927	1.83297	0.18776	1.18178	0.13853
1.83873	0.19941	1.83873	0.1879	1.18401	0.13866
1.84164	0.1995	1.84164	0.18799	1.18941	0.13885
1.84089	0.19955	1.84089	0.18803	1.18745	0.13898
1.84526	0.19973	1.84526	0.18822	1.18911	0.13921
1.84538	0.19983	1.84538	0.18831	1.18411	0.1393
1.84772	0.19996	1.84772	0.18845	1.18524	0.13953
1.85082	0.20006	1.85082	0.18854	1.18572	0.13962
1.85146	0.2001	1.85146	0.18858	1.19132	0.13976
1.85362	0.20028	1.85362	0.18877	1.19715	0.13994
1.85646	0.20033	1.85646	0.18881	1.19987	0.14008
1.86246	0.20051	1.86246	0.189	1.20112	0.14017
1.86367	0.20056	1.86367	0.18904	1.20496	0.1404
1.86076	0.20065	1.86076	0.18913	1.20711	0.14049
1.85898	0.20079	1.85898	0.18927	1.20874	0.14072
1.85967	0.20088	1.85967	0.18936	1.2106	0.14081
1.86507	0.20102	1.86507	0.1895	1.21166	0.14104
1.86718	0.20111	1.86718	0.18959	1.21027	0.14113
1.86675	0.20125	1.86675	0.18973	1.21208	0.14127
1.86757	0.20134	1.86757	0.18982	1.21157	0.14145
1.86819	0.20143	1.86819	0.18991	1.2171	0.14159
1.87211	0.20157	1.87211	0.19005	1.22279	0.14177
1.87529	0.20161	1.87529	0.1901	1.22122	0.14186
1.87673	0.20171	1.87673	0.19019	1.2254	0.142
1.87766	0.20189	1.87766	0.19037	1.22864	0.14223
1.87655	0.20194	1.87655	0.19042	1.2307	0.14227
1.88043	0.20212	1.88043	0.1906	1.23222	0.1425
1.8818	0.20217	1.8818	0.19065	1.23465	0.14264
1.88275	0.2023	1.88275	0.19079	1.23599	0.14273
1.88312	0.20239	1.88312	0.19088	1.23808	0.14291
1.88206	0.20249	1.88206	0.19097	1.24269	0.14305
1.88725	0.20262	1.88725	0.19111	1.24799	0.14323
1.88862	0.20272	1.88862	0.1912	1.24839	0.14332
1.89343	0.20281	1.89343	0.19129	1.25103	0.14346
1.89753	0.20294	1.89753	0.19143	1.25326	0.14364
1.89744	0.20304	1.89744	0.19152	1.25589	0.14373
1.89871	0.20317	1.89871	0.19166	1.25985	0.14396
1.89712	0.20327	1.89712	0.19175	1.25845	0.14405
1.8972	0.2034	1.8972	0.19189	1.26187	0.14414
1.89986	0.2035	1.89986	0.19198	1.26618	0.14433
1.90194	0.20354	1.90194	0.19202	1.26761	0.14446
1.90516	0.20368	1.90516	0.19216	1.27051	0.14465
1.90389	0.20377	1.90389	0.19225	1.27162	0.14474
1.90299	0.20386	1.90299	0.19234	1.27503	0.14483
1.90173	0.204	1.90173	0.19248	1.27743	0.14501
1.89931	0.20409	1.89931	0.19257	1.27577	0.1451
1.89761	0.20427	1.89761	0.19276	1.27981	0.14533
1.89411	0.20432	1.89411	0.1928	1.28391	0.14542
1.89408	0.2045	1.89408	0.19299	1.28228	0.14561
1.89576	0.2046	1.89576	0.19308	1.28042	0.1457
1.89576	0.20469	1.89576	0.19317	1.28042	0.14583
1.90028	0.20483	1.90028	0.19331	1.28009	0.14602
1.90139	0.20492	1.90139	0.1934	1.2809	0.14611
1.90503	0.20506	1.90503	0.19354	1.28038	0.14629
1.90749	0.20515	1.90749	0.19363	1.27808	0.14638
1.90703	0.20524	1.90703	0.19372	1.28143	0.14652
1.91166	0.20542	1.91166	0.1939	1.2826	0.1467
1.91183	0.20551	1.91183	0.194	1.28088	0.14679
1.91473	0.2057	1.91473	0.19418	1.28735	0.14702
1.91647	0.20579	1.91647	0.19427	1.28981	0.14711
1.91739	0.20588	1.91739	0.19436	1.29093	0.1472
1.91629	0.20602	1.91629	0.1945	1.29387	0.14739
1.91809	0.20611	1.91809	0.19459	1.29282	0.14752
1.91879	0.2062	1.91879	0.19468	1.29815	0.14771
1.92176	0.20634	1.92176	0.19482	1.30103	0.1478
1.92354	0.20643	1.92354	0.19491	1.30208	0.14793
1.92485	0.20661	1.92485	0.1951	1.30464	0.14812
1.92562	0.20671	1.92562	0.19519	1.30512	0.14821
1.92608	0.20684	1.92608	0.19533	1.30753	0.14844
1.92287	0.20694	1.92287	0.19542	1.31131	0.14853
1.92414	0.20703	1.92414	0.19551	1.31149	0.14862
1.92352	0.20721	1.92352	0.19569	1.31465	0.1488
1.92392	0.2073	1.92392	0.19579	1.31597	0.14894
1.9275	0.20739	1.9275	0.19588	1.31462	0.14912
1.9301	0.20758	1.9301	0.19606	1.31469	0.14921
1.92899	0.20762	1.92899	0.19611	1.31259	0.1493
1.9309	0.20781	1.9309	0.19629	1.31313	0.14949
1.93029	0.2079	1.93029	0.19638	1.31687	0.14962
1.932	0.20808	1.932	0.19657	1.31973	0.14981
1.93373	0.20817	1.93373	0.19666	1.31902	0.1499
1.93738	0.20827	1.93738	0.19675	1.32167	0.15004
1.93962	0.20845	1.93962	0.19693	1.32372	0.15022
1.94273	0.20854	1.94273	0.19702	1.32625	0.15035
1.94711	0.20863	1.94711	0.19712	1.32921	0.15054
1.95439	0.20882	1.95439	0.1973	1.33056	0.15063
1.95758	0.20886	1.95758	0.19734	1.3319	0.15081
1.96042	0.20905	1.96042	0.19753	1.3359	0.1509
1.96104	0.20914	1.96104	0.19762	1.33718	0.15104
1.96553	0.20927	1.96553	0.19776	1.33778	0.15122
1.97064	0.20937	1.97064	0.19785	1.33734	0.15131
1.97383	0.20946	1.97383	0.19794	1.34122	0.1514
1.97847	0.2096	1.97847	0.19808	1.34603	0.15163
1.97829	0.20969	1.97829	0.19817	1.34651	0.15172
1.98214	0.20978	1.98214	0.19826	1.35289	0.15191
1.98399	0.20992	1.98399	0.1984	1.35071	0.15204
1.97901	0.21001	1.97901	0.19849	1.35222	0.15223
1.98482	0.21019	1.98482	0.19868	1.35592	0.15232
1.98976	0.21028	1.98976	0.19877	1.35381	0.15241
1.99455	0.21042	1.99455	0.1989	1.35899	0.15259
2.00005	0.21047	2.00005	0.19895	1.36197	0.15273
2.0041	0.21056	2.0041	0.19904	1.36146	0.15282
2.00866	0.2107	2.00866	0.19918	1.36502	0.153
2.01204	0.21079	2.01204	0.19927	1.36583	0.15309
2.01707	0.21093	2.01707	0.19941	1.36668	0.15332
2.01883	0.21102	2.01883	0.1995	1.3692	0.15341
2.02131	0.21106	2.02131	0.19955	1.36856	0.1536
2.02108	0.21125	2.02108	0.19973	1.36661	0.15369
2.02284	0.21129	2.02284	0.19978	1.36809	0.15378
2.02918	0.21143	2.02918	0.19991	1.36676	0.15396
2.03039	0.21152	2.03039	0.20001	1.36499	0.1541
2.03245	0.21157	2.03245	0.20005	1.36338	0.15428
2.03199	0.21171	2.03199	0.20019	1.36524	0.15437
2.03372	0.2118	2.03372	0.20028	1.36375	0.15451
2.0347	0.21194	2.0347	0.20042	1.36731	0.15469
2.03493	0.21198	2.03493	0.20046	1.36964	0.15483
2.03456	0.21207	2.03456	0.20056	1.3734	0.15501
2.03442	0.21221	2.03442	0.20069	1.37581	0.1551
2.03619	0.21226	2.03619	0.20074	1.37727	0.15524
2.04034	0.21244	2.04034	0.20092	1.38255	0.15542
2.04315	0.21249	2.04315	0.20097	1.38423	0.15551
2.04382	0.21253	2.04382	0.20101	1.38887	0.15574
2.04837	0.21272	2.04837	0.2012	1.39131	0.15583
2.04768	0.21276	2.04768	0.20124	1.38902	0.15593
2.04618	0.2129	2.04618	0.20138	1.3907	0.15615
2.04578	0.21299	2.04578	0.20147	1.39265	0.1562
2.04721	0.21308	2.04721	0.20157	1.39489	0.15643
2.04828	0.21317	2.04828	0.20166	1.39829	0.15656
2.05214	0.21327	2.05214	0.20175	1.39907	0.15666
2.05811	0.2134	2.05811	0.20189	1.40194	0.15684
2.05916	0.2135	2.05916	0.20198	1.40581	0.15693
2.06454	0.21363	2.06454	0.20212	1.40972	0.15711
2.06275	0.21372	2.06275	0.20221	1.40864	0.15725
2.0626	0.21377	2.0626	0.20225	1.41068	0.15734
2.06201	0.21391	2.06201	0.20239	1.41349	0.15757
2.06346	0.214	2.06346	0.20248	1.41749	0.15762
2.06148	0.21405	2.06148	0.20253	1.42611	0.15784
2.06411	0.21418	2.06411	0.20267	1.42876	0.15793
2.06521	0.21428	2.06521	0.20276	1.43381	0.15812
2.06902	0.21441	2.06902	0.2029	1.43776	0.15821
2.06712	0.21446	2.06712	0.20294	1.43874	0.1583
2.06766	0.21464	2.06766	0.20313	1.44112	0.15848
2.07042	0.21473	2.07042	0.20322	1.44534	0.15857
2.07187	0.21478	2.07187	0.20326	1.44512	0.15867
2.07437	0.21492	2.07437	0.2034	1.448	0.15885
2.07731	0.21501	2.07731	0.20349	1.4495	0.15894
2.08057	0.21515	2.08057	0.20363	1.45048	0.15912
2.08265	0.21519	2.08265	0.20368	1.44978	0.15921
2.0831	0.21528	2.0831	0.20377	1.45141	0.1594
2.08637	0.21547	2.08637	0.20395	1.45625	0.15949
2.08785	0.21551	2.08785	0.204	1.45483	0.15958
2.09311	0.21565	2.09311	0.20413	1.45874	0.15976
2.09306	0.21574	2.09306	0.20423	1.46152	0.15985
2.09264	0.21579	2.09264	0.20427	1.46224	0.15994
2.09465	0.21593	2.09465	0.20441	1.46576	0.16008
2.09469	0.21602	2.09469	0.2045	1.4708	0.16022
2.09949	0.21616	2.09949	0.20464	1.47818	0.1604
2.10104	0.2162	2.10104	0.20468	1.47855	0.16045
2.10283	0.21629	2.10283	0.20478	1.48417	0.16063
2.10479	0.21643	2.10479	0.20491	1.48701	0.16072
2.10684	0.21648	2.10684	0.20496	1.48806	0.16081
2.1087	0.21666	2.1087	0.20514	1.49282	0.16099
2.1101	0.21671	2.1101	0.20519	1.49646	0.16108
2.11254	0.21675	2.11254	0.20524	1.4951	0.16122
2.11632	0.21694	2.11632	0.20542	1.49446	0.16131
2.11441	0.21698	2.11441	0.20546	1.49354	0.1614
2.11729	0.21712	2.11729	0.2056	1.49775	0.16159
2.11755	0.21721	2.11755	0.20569	1.50168	0.16163
2.12005	0.21726	2.12005	0.20574	1.50659	0.16182
2.12116	0.21739	2.12116	0.20588	1.50605	0.16191
2.12252	0.21749	2.12252	0.20597	1.50669	0.16195
2.12555	0.21762	2.12555	0.20611	1.50759	0.16214
2.12499	0.21767	2.12499	0.20615	1.50873	0.16223
2.12623	0.21776	2.12623	0.20624	1.50675	0.16236
2.12959	0.2179	2.12959	0.20638	1.5069	0.16245
2.13129	0.21799	2.13129	0.20647	1.50836	0.16255
2.13446	0.21813	2.13446	0.20661	1.50986	0.16273
2.13744	0.21817	2.13744	0.20666	1.50899	0.16282
2.13931	0.21831	2.13931	0.20679	1.51036	0.163
2.14304	0.2184	2.14304	0.20689	1.51362	0.16309
2.14302	0.21845	2.14302	0.20693	1.51529	0.16314
2.14995	0.21863	2.14995	0.20712	1.51683	0.16332
2.15236	0.21868	2.15236	0.20716	1.51698	0.16341
2.15781	0.21872	2.15781	0.20721	1.52019	0.16355
2.16162	0.21886	2.16162	0.20735	1.52164	0.16364
2.16307	0.21891	2.16307	0.20739	1.52093	0.16373
2.16746	0.21905	2.16746	0.20753	1.52203	0.16392
2.17223	0.21914	2.17223	0.20762	1.52153	0.16401
2.17504	0.21923	2.17504	0.20771	1.52208	0.16419
2.17678	0.21932	2.17678	0.2078	1.5227	0.16424
2.17564	0.21937	2.17564	0.20785	1.52292	0.16433
2.17941	0.2195	2.17941	0.20799	1.53039	0.16451
2.18057	0.21955	2.18057	0.20803	1.53329	0.1646
2.18262	0.21969	2.18262	0.20817	1.53961	0.16478
2.18325	0.21973	2.18325	0.20822	1.53978	0.16488
2.18394	0.21978	2.18394	0.20826	1.5412	0.16501
2.18387	0.21992	2.18387	0.2084	1.54233	0.1651
2.18508	0.22001	2.18508	0.20849	1.54405	0.16519
2.18662	0.2201	2.18662	0.20858	1.54892	0.16538
2.18794	0.22019	2.18794	0.20868	1.54981	0.16542
2.18738	0.22024	2.18738	0.20872	1.55355	0.16561
2.19115	0.22038	2.19115	0.20886	1.55682	0.1657
2.19297	0.22042	2.19297	0.20891	1.55757	0.16574
2.19646	0.22056	2.19646	0.20904	1.55405	0.16593
2.19724	0.22061	2.19724	0.20909	1.55922	0.16602
2.2014	0.22065	2.2014	0.20913	1.5592	0.1662
2.20327	0.22079	2.20327	0.20927	1.56082	0.16629
2.20318	0.22088	2.20318	0.20936	1.56293	0.16634
2.20399	0.22097	2.20399	0.20946	1.56698	0.16652
2.20154	0.22106	2.20154	0.20955	1.56781	0.16661
2.20259	0.22111	2.20259	0.20959	1.56741	0.16679
2.20274	0.22125	2.20274	0.20973	1.5687	0.16688
2.2035	0.22129	2.2035	0.20978	1.56878	0.16693
2.2068	0.22143	2.2068	0.20991	1.56717	0.16711
2.20734	0.22148	2.20734	0.20996	1.56704	0.1672
2.20791	0.22157	2.20791	0.21005	1.56966	0.16734
2.21329	0.22171	2.21329	0.21019	1.56842	0.16743
2.21345	0.22175	2.21345	0.21024	1.57155	0.16752
2.21789	0.22189	2.21789	0.21037	1.57548	0.16766
2.21963	0.22194	2.21963	0.21042	1.57718	0.16775
2.22437	0.22207	2.22437	0.21056	1.5791	0.16793
2.22422	0.22212	2.22422	0.2106	1.58116	0.16803
2.22817	0.22221	2.22817	0.21069	1.58363	0.16812
2.22991	0.2223	2.22991	0.21079	1.588	0.1683
2.23102	0.22239	2.23102	0.21088	1.59033	0.16839
2.23089	0.22244	2.23089	0.21092	1.59335	0.16853
2.23357	0.22258	2.23357	0.21106	1.59427	0.16862
2.23339	0.22262	2.23339	0.21111	1.59315	0.16871
2.23591	0.22276	2.23591	0.21124	1.59338	0.16885
2.23597	0.22281	2.23597	0.21129	1.5952	0.16894
2.23818	0.22294	2.23818	0.21143	1.59609	0.16912
2.23814	0.22299	2.23814	0.21147	1.59527	0.16921
2.23996	0.22308	2.23996	0.21157	1.59775	0.1693
2.24329	0.22317	2.24329	0.21166	1.60197	0.16949
2.2453	0.22327	2.2453	0.21175	1.60159	0.16953
2.24655	0.22331	2.24655	0.21179	1.60749	0.16972
2.2492	0.22345	2.2492	0.21193	1.60745	0.16981
2.25386	0.22349	2.25386	0.21198	1.61252	0.16994
2.25517	0.22363	2.25517	0.21212	1.61385	0.17003
2.25801	0.22368	2.25801	0.21216	1.61456	0.17013
2.25975	0.22382	2.25975	0.2123	1.6181	0.17026
2.26242	0.22386	2.26242	0.21235	1.62014	0.17035
2.2626	0.22395	2.2626	0.21244	1.62064	0.17045
2.2647	0.22405	2.2647	0.21253	1.62516	0.17063
2.26562	0.22409	2.26562	0.21257	1.62605	0.17067
2.26753	0.22418	2.26753	0.21267	1.62809	0.17086
2.26722	0.22428	2.26722	0.21276	1.63218	0.17095
2.26887	0.22437	2.26887	0.21285	1.63107	0.17113
2.27154	0.2245	2.27154	0.21299	1.63154	0.17118
2.27187	0.2245	2.27187	0.21299	1.63115	0.17127
2.27703	0.22464	2.27703	0.21312	1.63381	0.17145
2.27861	0.22473	2.27861	0.21322	1.63739	0.17154
2.27903	0.22478	2.27903	0.21326	1.64078	0.17168
2.28006	0.22492	2.28006	0.2134	1.64083	0.17177
2.28078	0.22496	2.28078	0.21345	1.64482	0.17186
2.28271	0.22505	2.28271	0.21354	1.64655	0.172
2.28369	0.22515	2.28369	0.21363	1.64938	0.17209
2.28298	0.22519	2.28298	0.21368	1.65169	0.17223
2.28131	0.22533	2.28131	0.21381	1.65366	0.17232
2.28046	0.22538	2.28046	0.21386	1.65504	0.17241
2.28336	0.22551	2.28336	0.214	1.6562	0.17255
2.28327	0.22561	2.28327	0.21409	1.65669	0.17264
2.28419	0.22561	2.28419	0.21409	1.66127	0.17282
2.28479	0.22579	2.28479	0.21427	1.66019	0.17287
2.28577	0.22583	2.28577	0.21432	1.66372	0.17296
2.28711	0.22597	2.28711	0.21446	1.6665	0.17314
2.28546	0.22602	2.28546	0.2145	1.66566	0.17319
2.28675	0.22611	2.28675	0.21459	1.6709	0.17337
2.29106	0.2262	2.29106	0.21468	1.67173	0.17346
2.29441	0.22629	2.29441	0.21478	1.67595	0.17355
2.3	0.22643	2.3	0.21491	1.67801	0.17369
2.30336	0.22648	2.30336	0.21496	1.67711	0.17378
2.30404	0.22652	2.30404	0.21501	1.68054	0.17392
2.30769	0.22666	2.30769	0.21514	1.67855	0.17401
2.30823	0.22675	2.30823	0.21524	1.68183	0.17405
2.30894	0.2268	2.30894	0.21528	1.68561	0.17424
2.3101	0.22694	2.3101	0.21542	1.68666	0.17428
2.31129	0.22698	2.31129	0.21546	1.69143	0.17446
2.31292	0.22712	2.31292	0.2156	1.6906	0.17456
2.31438	0.22721	2.31438	0.21569	1.69325	0.1746
2.32003	0.2273	2.32003	0.21579	1.69367	0.17478
2.3226	0.22739	2.3226	0.21588	1.69096	0.17487
2.32252	0.22744	2.32252	0.21592	1.69494	0.17501
2.32507	0.22758	2.32507	0.21606	1.69447	0.17506
2.32618	0.22762	2.32618	0.21611	1.69572	0.17515
2.32866	0.22767	2.32866	0.21615	1.69727	0.17529
2.33203	0.22781	2.33203	0.21629	1.69823	0.17538
2.33628	0.22785	2.33628	0.21634	1.70282	0.17556
2.34001	0.22799	2.34001	0.21647	1.70397	0.17565
2.34378	0.22808	2.34378	0.21657	1.70725	0.17579
2.34608	0.22817	2.34608	0.21666	1.71262	0.17588
2.34708	0.22822	2.34708	0.2167	1.71129	0.17597
2.34721	0.22831	2.34721	0.21679	1.71674	0.17611
2.35136	0.2284	2.35136	0.21689	1.71785	0.17615
2.35308	0.22845	2.35308	0.21693	1.71941	0.17624
2.35243	0.22854	2.35243	0.21702	1.72036	0.17638
2.35576	0.22863	2.35576	0.21712	1.72247	0.17647
2.35504	0.22872	2.35504	0.21721	1.7255	0.17666
2.35633	0.22882	2.35633	0.2173	1.7245	0.1767
2.35671	0.22886	2.35671	0.21735	1.72614	0.17684
2.36116	0.229	2.36116	0.21748	1.72543	0.17693
2.36304	0.22905	2.36304	0.21753	1.72753	0.17702
2.36661	0.22914	2.36661	0.21762	1.72899	0.17716
2.37213	0.22923	2.37213	0.21771	1.72817	0.17725
2.37501	0.22928	2.37501	0.21776	1.73338	0.17739
2.37958	0.22941	2.37958	0.2179	1.73197	0.17748
2.37982	0.22946	2.37982	0.21794	1.73455	0.17757
2.38087	0.2295	2.38087	0.21799	1.73332	0.17771
2.38303	0.22964	2.38303	0.21812	1.73222	0.17775
2.38423	0.22969	2.38423	0.21817	1.73048	0.17793
2.39115	0.22978	2.39115	0.21826	1.72785	0.17803
2.39251	0.22987	2.39251	0.21835	1.72862	0.17807
2.39515	0.22987	2.39515	0.21835	1.73052	0.17825
2.40005	0.23001	2.40005	0.21849	1.7326	0.17835
2.39973	0.23005	2.39973	0.21854	1.73623	0.17848
2.40228	0.23015	2.40228	0.21863	1.73732	0.17857
2.404	0.23019	2.404	0.21868	1.74296	0.17867
2.40671	0.23028	2.40671	0.21877	1.74442	0.17885
2.40799	0.23038	2.40799	0.21886	1.74462	0.17889
2.41069	0.23042	2.41069	0.21891	1.74645	0.17908
2.41349	0.23051	2.41349	0.219	1.74939	0.17917
2.41214	0.23061	2.41214	0.21909	1.75014	0.17926
2.41321	0.23061	2.41321	0.21909	1.75331	0.1794
2.41666	0.23074	2.41666	0.21923	1.75144	0.17949
2.41836	0.23079	2.41836	0.21927	1.7555	0.17958
2.42269	0.23088	2.42269	0.21936	1.75341	0.17972
2.4221	0.23093	2.4221	0.21941	1.7535	0.17981
2.42288	0.23097	2.42288	0.21946	1.75503	0.17999
2.42427	0.23106	2.42427	0.21955	1.75682	0.18008
2.4262	0.23116	2.4262	0.21964	1.75744	0.18013
2.42828	0.23125	2.42828	0.21973	1.76163	0.18031
2.42902	0.23129	2.42902	0.21978	1.76296	0.1804
2.43158	0.23138	2.43158	0.21987	1.76618	0.18054
2.43359	0.23143	2.43359	0.21991	1.76861	0.18063
2.43541	0.23152	2.43541	0.22001	1.77101	0.18072
2.43731	0.23161	2.43731	0.2201	1.77446	0.18086
2.43718	0.23166	2.43718	0.22014	1.76978	0.18095
2.43825	0.23175	2.43825	0.22024	1.76631	0.18113
2.43761	0.2318	2.43761	0.22028	1.76915	0.18118
2.43722	0.23184	2.43722	0.22033	1.77296	0.18136
2.43562	0.23198	2.43562	0.22046	1.77238	0.18145
2.43577	0.23203	2.43577	0.22051	1.77265	0.18154
2.43954	0.23212	2.43954	0.2206	1.76324	0.18168
2.44022	0.23217	2.44022	0.22065	1.76752	0.18177
2.44037	0.23221	2.44037	0.22069	1.76854	0.18186
2.4401	0.23235	2.4401	0.22083	1.77169	0.182
2.4395	0.23239	2.4395	0.22088	1.77497	0.18209
2.44173	0.23249	2.44173	0.22097	1.78132	0.18227
2.44082	0.23253	2.44082	0.22101	1.78203	0.18236
2.44206	0.23262	2.44206	0.22111	1.7834	0.18255
2.44516	0.23272	2.44516	0.2212	1.78591	0.18264
2.4451	0.23276	2.4451	0.22124	1.78595	0.18273
2.44566	0.2329	2.44566	0.22138	1.78808	0.18287
2.44675	0.23294	2.44675	0.22143	1.78957	0.18296
2.44954	0.23304	2.44954	0.22152	1.79344	0.18309
2.45315	0.23313	2.45315	0.22161	1.7962	0.18319
2.45555	0.23317	2.45555	0.22166	1.79493	0.18328
2.45739	0.23322	2.45739	0.2217	1.79813	0.18346
2.45823	0.23331	2.45823	0.22179	1.79961	0.18355
2.46009	0.2334	2.46009	0.22189	1.80245	0.18373
2.45921	0.23349	2.45921	0.22198	1.80596	0.18382
2.45861	0.23359	2.45861	0.22207	1.80662	0.18387
2.45772	0.23363	2.45772	0.22212	1.81037	0.18405
2.45935	0.23372	2.45935	0.22221	1.81359	0.18414
2.46187	0.23382	2.46187	0.2223	1.81468	0.18428
2.46339	0.23391	2.46339	0.22239	1.81497	0.18437
2.46559	0.23395	2.46559	0.22244	1.81639	0.18446
2.46604	0.234	2.46604	0.22248	1.81721	0.1846
2.46508	0.23414	2.46508	0.22262	1.81834	0.18469
2.46512	0.23418	2.46512	0.22267	1.81068	0.18487
2.46725	0.23432	2.46725	0.2228	1.81437	0.18497
2.46823	0.23437	2.46823	0.22285	1.81711	0.18506
2.46767	0.23441	2.46767	0.2229	1.81991	0.18524
2.47001	0.23455	2.47001	0.22303	1.82168	0.18533
2.47163	0.2346	2.47163	0.22308	1.82088	0.18547
2.47703	0.23473	2.47703	0.22322	1.82346	0.18556
2.47699	0.23478	2.47699	0.22326	1.82232	0.18565
2.47994	0.23483	2.47994	0.22331	1.82382	0.18579
2.47801	0.23496	2.47801	0.22345	1.82462	0.18588
2.47757	0.23501	2.47757	0.22349	1.8242	0.18606
2.4769	0.23515	2.4769	0.22363	1.8268	0.18615
2.4765	0.23519	2.4765	0.22368	1.82613	0.18625
2.46066	0.23533	2.46066	0.22381	1.82927	0.18643
2.4589	0.23538	2.4589	0.22386	1.83144	0.18652
2.46001	0.23547	2.46001	0.22395	1.83408	0.18666
2.46301	0.23556	2.46301	0.22404	1.83698	0.18675
2.46687	0.23565	2.46687	0.22413	1.83868	0.18693
2.46791	0.23579	2.46791	0.22427	1.84306	0.18702
2.46731	0.23583	2.46731	0.22432	1.84316	0.18711
2.4678	0.23593	2.4678	0.22441	1.84689	0.1873
2.47409	0.23606	2.47409	0.22455	1.84818	0.18734
2.47724	0.23611	2.47724	0.22459	1.84921	0.18743
2.4822	0.23625	2.4822	0.22473	1.84975	0.18762
2.48627	0.23634	2.48627	0.22482	1.85009	0.18771
2.48738	0.23638	2.48738	0.22487	1.85725	0.18789
2.49164	0.23652	2.49164	0.22501	1.86131	0.18798
2.49052	0.23661	2.49052	0.2251	1.86399	0.18812
2.49673	0.23671	2.49673	0.22519	1.86465	0.18821
2.49815	0.2368	2.49815	0.22528	1.86543	0.1883
2.50228	0.23684	2.50228	0.22533	1.86792	0.18844
2.5073	0.23698	2.5073	0.22546	1.87061	0.18853
2.50718	0.23703	2.50718	0.22551	1.8749	0.18871
2.51087	0.23712	2.51087	0.2256	1.87238	0.1888
2.51345	0.23726	2.51345	0.22574	1.87669	0.18885
2.51475	0.2373	2.51475	0.22579	1.88117	0.18903
2.51889	0.23739	2.51889	0.22588	1.87962	0.18912
2.52008	0.23749	2.52008	0.22597	1.88625	0.18926
2.51981	0.23753	2.51981	0.22601	1.88702	0.18935
2.52103	0.23767	2.52103	0.22615	1.89028	0.18944
2.52032	0.23772	2.52032	0.2262	1.89414	0.18958
2.52251	0.23785	2.52251	0.22634	1.8934	0.18967
2.52382	0.2379	2.52382	0.22638	1.89736	0.18985
2.52757	0.23794	2.52757	0.22643	1.89702	0.1899
2.52567	0.23808	2.52567	0.22657	1.90177	0.18999
2.52697	0.23817	2.52697	0.22666	1.90442	0.19017
2.52679	0.23827	2.52679	0.22675	1.90534	0.19022
2.52862	0.23831	2.52862	0.22679	1.91069	0.1904
2.5322	0.2384	2.5322	0.22689	1.90958	0.19045
2.5346	0.23849	2.5346	0.22698	1.91004	0.19054
2.53776	0.23859	2.53776	0.22707	1.91182	0.19067
2.53837	0.23872	2.53837	0.22721	1.90987	0.19077
2.54088	0.23877	2.54088	0.22725	1.91215	0.19095
2.54013	0.23882	2.54013	0.2273	1.91403	0.19099
2.54554	0.23895	2.54554	0.22744	1.91696	0.19108
2.54643	0.239	2.54643	0.22748	1.92125	0.19127
2.55349	0.23914	2.55349	0.22762	1.92056	0.19131
2.55484	0.23918	2.55484	0.22767	1.92036	0.1915
2.55585	0.23923	2.55585	0.22771	1.9221	0.19159
2.55032	0.23937	2.55032	0.22785	1.92115	0.19163
2.54773	0.23941	2.54773	0.2279	1.92183	0.19182
2.54874	0.23955	2.54874	0.22803	1.92422	0.19186
2.54786	0.2396	2.54786	0.22808	1.92912	0.192
2.54967	0.23973	2.54967	0.22822	1.93166	0.19209
2.55169	0.23978	2.55169	0.22826	1.93287	0.19218
2.5534	0.23987	2.5534	0.22835	1.94056	0.19236
2.5579	0.23996	2.5579	0.22845	1.94074	0.19241
2.55957	0.24005	2.55957	0.22854	1.94585	0.19259
2.56321	0.24015	2.56321	0.22863	1.9479	0.19268
2.56232	0.24024	2.56232	0.22872	1.95087	0.19277
2.56194	0.24028	2.56194	0.22877	1.94986	0.19287
2.56368	0.24042	2.56368	0.22891	1.95098	0.19296
2.56399	0.24047	2.56399	0.22895	1.95606	0.19309
2.56738	0.24061	2.56738	0.22909	1.95815	0.19319
2.56711	0.2407	2.56711	0.22918	1.96132	0.19328
2.57186	0.24074	2.57186	0.22923	1.96373	0.19341
2.572	0.24088	2.572	0.22936	1.96073	0.19346
2.57487	0.24093	2.57487	0.22941	1.96303	0.19364
2.57595	0.24102	2.57595	0.2295	1.96273	0.19373
2.58051	0.24111	2.58051	0.22959	1.96684	0.19387
2.58169	0.2412	2.58169	0.22968	1.96713	0.19392
2.58187	0.24129	2.58187	0.22978	1.96694	0.19401
2.58078	0.24138	2.58078	0.22987	1.97257	0.19414
2.58397	0.24143	2.58397	0.22991	1.97196	0.19424
2.58596	0.24157	2.58596	0.23005	1.97489	0.19433
2.58591	0.24161	2.58591	0.2301	1.97763	0.19446
2.58935	0.24175	2.58935	0.23024	1.98246	0.19451
2.59122	0.2418	2.59122	0.23028	1.98746	0.19469
2.59189	0.24189	2.59189	0.23037	1.98762	0.19474
2.5931	0.24203	2.5931	0.23051	1.98833	0.19492
2.59408	0.24207	2.59408	0.23056	1.98949	0.19497
2.5953	0.24221	2.5953	0.23069	1.99157	0.19506
2.59693	0.24226	2.59693	0.23074	1.99466	0.19519
2.59782	0.2423	2.59782	0.23079	1.99791	0.19529
2.59969	0.24244	2.59969	0.23092	1.99773	0.19538
[truncated: 8,676 more rows]

## Sheet: 5-10mm，Stress-compation
Stress	SP5-10(3)	Stress	SP5-10(5)	Stress	SP5-10(7)
0	1	0	1	0	1
0.10068	0.97888	0.10068	0.98958	0.10068	0.99888
0.10078	0.97883	0.10078	0.98803	0.10078	0.99883
0.10149	0.97883	0.10149	0.98803	0.10149	0.99883
0.10094	0.97883	0.10094	0.98803	0.10094	0.99883
0.10103	0.97883	0.10103	0.98803	0.10103	0.99883
0.10164	0.97883	0.10164	0.98803	0.10164	0.99883
0.1009	0.97879	0.1009	0.98799	0.1009	0.99879
0.10127	0.97879	0.10127	0.98799	0.10127	0.99879
0.1021	0.97879	0.1021	0.98799	0.1021	0.99879
0.0998	0.97879	0.0998	0.98799	0.0998	0.99879
0.10085	0.97879	0.10085	0.98799	0.10085	0.99879
0.10018	0.97875	0.10018	0.98795	0.10018	0.99875
0.10025	0.97875	0.10025	0.98795	0.10025	0.99875
0.1019	0.97875	0.1019	0.98795	0.1019	0.99875
0.10076	0.97875	0.10076	0.98795	0.10076	0.99875
0.10152	0.9787	0.10152	0.9879	0.10152	0.9987
0.1008	0.9787	0.1008	0.9879	0.1008	0.9987
0.10181	0.9787	0.10181	0.9879	0.10181	0.9987
0.10374	0.9787	0.10374	0.9879	0.10374	0.9987
0.10281	0.9787	0.10281	0.9879	0.10281	0.9987
0.11005	0.97866	0.11005	0.98786	0.11005	0.99866
0.10283	0.97866	0.10283	0.98786	0.10283	0.99866
0.10385	0.97866	0.10385	0.98786	0.10385	0.99866
0.10287	0.97866	0.10287	0.98786	0.10287	0.99866
0.10355	0.97866	0.10355	0.98786	0.10355	0.99866
0.10255	0.97861	0.10255	0.98781	0.10255	0.99861
0.10301	0.97861	0.10301	0.98781	0.10301	0.99861
0.10247	0.97861	0.10247	0.98781	0.10247	0.99861
0.10269	0.97861	0.10269	0.98781	0.10269	0.99861
0.10224	0.97861	0.10224	0.98781	0.10224	0.99861
0.09282	0.97857	0.09282	0.98777	0.09282	0.99857
0.10261	0.97857	0.10261	0.98777	0.10261	0.99857
0.10309	0.97857	0.10309	0.98777	0.10309	0.99857
0.10187	0.97857	0.10187	0.98777	0.10187	0.99857
0.10159	0.97857	0.10159	0.98777	0.10159	0.99857
0.10323	0.97853	0.10323	0.98773	0.10323	0.99853
0.10311	0.97853	0.10311	0.98773	0.10311	0.99853
0.10261	0.97853	0.10261	0.98773	0.10261	0.99853
0.10346	0.97853	0.10346	0.98773	0.10346	0.99853
0.10267	0.97853	0.10267	0.98773	0.10267	0.99853
0.1027	0.97848	0.1027	0.98768	0.1027	0.99848
0.10374	0.97848	0.10374	0.98768	0.10374	0.99848
0.10498	0.97848	0.10498	0.98768	0.10498	0.99848
0.10475	0.97848	0.10475	0.98768	0.10475	0.99848
0.10507	0.97844	0.10507	0.98764	0.10507	0.99844
0.10474	0.97844	0.10474	0.98764	0.10474	0.99844
0.10568	0.97844	0.10568	0.98764	0.10568	0.99844
0.10411	0.97844	0.10411	0.98764	0.10411	0.99844
0.1043	0.97844	0.1043	0.98764	0.1043	0.99844
0.09589	0.9784	0.09589	0.9876	0.09589	0.9984
0.10438	0.9784	0.10438	0.9876	0.10438	0.9984
0.10385	0.9784	0.10385	0.9876	0.10385	0.9984
0.10401	0.9784	0.10401	0.9876	0.10401	0.9984
0.10298	0.9784	0.10298	0.9876	0.10298	0.9984
0.10321	0.97835	0.10321	0.98755	0.10321	0.99835
0.10448	0.97835	0.10448	0.98755	0.10448	0.99835
0.1032	0.97835	0.1032	0.98755	0.1032	0.99835
0.10401	0.97835	0.10401	0.98755	0.10401	0.99835
0.1105	0.97831	0.1105	0.98751	0.1105	0.99831
0.10539	0.97831	0.10539	0.98751	0.10539	0.99831
0.10484	0.97831	0.10484	0.98751	0.10484	0.99831
0.10503	0.97831	0.10503	0.98751	0.10503	0.99831
0.1047	0.97831	0.1047	0.98751	0.1047	0.99831
0.10428	0.97826	0.10428	0.98746	0.10428	0.99826
0.10437	0.97826	0.10437	0.98746	0.10437	0.99826
0.10415	0.97826	0.10415	0.98746	0.10415	0.99826
0.10337	0.97826	0.10337	0.98746	0.10337	0.99826
0.10425	0.97826	0.10425	0.98746	0.10425	0.99826
0.0984	0.97822	0.0984	0.98742	0.0984	0.99822
0.10306	0.97822	0.10306	0.98742	0.10306	0.99822
0.10275	0.97822	0.10275	0.98742	0.10275	0.99822
0.10399	0.97822	0.10399	0.98742	0.10399	0.99822
0.10302	0.97822	0.10302	0.98742	0.10302	0.99822
0.10429	0.97818	0.10429	0.98738	0.10429	0.99818
0.1032	0.97818	0.1032	0.98738	0.1032	0.99818
0.10419	0.97818	0.10419	0.98738	0.10419	0.99818
0.10318	0.97818	0.10318	0.98738	0.10318	0.99818
0.10369	0.97818	0.10369	0.98738	0.10369	0.99818
0.10795	0.97813	0.10795	0.98733	0.10795	0.99813
0.10553	0.97813	0.10553	0.98733	0.10553	0.99813
0.10611	0.97813	0.10611	0.98733	0.10611	0.99813
0.10558	0.97813	0.10558	0.98733	0.10558	0.99813
0.10452	0.97813	0.10452	0.98733	0.10452	0.99813
0.10662	0.97809	0.10662	0.98729	0.10662	0.99809
0.10583	0.97809	0.10583	0.98729	0.10583	0.99809
0.1057	0.97809	0.1057	0.98729	0.1057	0.99809
0.10451	0.97809	0.10451	0.98729	0.10451	0.99809
0.10545	0.97809	0.10545	0.98729	0.10545	0.99809
0.1047	0.97804	0.1047	0.98724	0.1047	0.99804
0.10516	0.97804	0.10516	0.98724	0.10516	0.99804
0.10502	0.97804	0.10502	0.98724	0.10502	0.99804
0.1048	0.97804	0.1048	0.98724	0.1048	0.99804
0.10434	0.97804	0.10434	0.98724	0.10434	0.99804
0.10542	0.978	0.10542	0.9872	0.10542	0.998
0.10429	0.978	0.10429	0.9872	0.10429	0.998
0.10531	0.978	0.10531	0.9872	0.10531	0.998
0.10558	0.978	0.10558	0.9872	0.10558	0.998
0.11435	0.97796	0.11435	0.98716	0.11435	0.99796
0.10731	0.97796	0.10731	0.98716	0.10731	0.99796
0.10736	0.97796	0.10736	0.98716	0.10736	0.99796
0.10698	0.97796	0.10698	0.98716	0.10698	0.99796
0.10693	0.97796	0.10693	0.98716	0.10693	0.99796
0.10479	0.97791	0.10479	0.98711	0.10479	0.99791
0.10563	0.97791	0.10563	0.98711	0.10563	0.99791
0.1063	0.97791	0.1063	0.98711	0.1063	0.99791
0.10759	0.97791	0.10759	0.98711	0.10759	0.99791
0.10383	0.97787	0.10383	0.98707	0.10383	0.99787
0.10447	0.97787	0.10447	0.98707	0.10447	0.99787
0.106	0.97787	0.106	0.98707	0.106	0.99787
0.10514	0.97787	0.10514	0.98707	0.10514	0.99787
0.10511	0.97787	0.10511	0.98707	0.10511	0.99787
0.10707	0.97787	0.10707	0.98707	0.10707	0.99787
0.10662	0.97782	0.10662	0.98702	0.10662	0.99783
0.10662	0.97782	0.10662	0.98702	0.10662	0.99783
0.10708	0.97782	0.10708	0.98702	0.10708	0.99783
0.10662	0.97782	0.10662	0.98702	0.10662	0.99783
0.10867	0.97782	0.10867	0.98702	0.10867	0.99783
0.10876	0.97778	0.10876	0.98698	0.10876	0.99778
0.108	0.97778	0.108	0.98698	0.108	0.99778
0.10795	0.97778	0.10795	0.98698	0.10795	0.99778
0.10876	0.97778	0.10876	0.98698	0.10876	0.99778
0.10881	0.97774	0.10881	0.98694	0.10881	0.99774
0.10845	0.97774	0.10845	0.98694	0.10845	0.99774
0.10858	0.97774	0.10858	0.98694	0.10858	0.99774
0.10887	0.97774	0.10887	0.98694	0.10887	0.99774
0.10908	0.97774	0.10908	0.98694	0.10908	0.99774
0.10145	0.97769	0.10145	0.98689	0.10145	0.99769
0.10667	0.97769	0.10667	0.98689	0.10667	0.99769
0.10784	0.97769	0.10784	0.98689	0.10784	0.99769
0.10761	0.97769	0.10761	0.98689	0.10761	0.99769
0.10698	0.97769	0.10698	0.98689	0.10698	0.99769
0.10831	0.97765	0.10831	0.98685	0.10831	0.99765
0.1069	0.97765	0.1069	0.98685	0.1069	0.99765
0.1074	0.97765	0.1074	0.98685	0.1074	0.99765
0.10798	0.97765	0.10798	0.98685	0.10798	0.99765
0.10896	0.97765	0.10896	0.98685	0.10896	0.99765
0.1199	0.97761	0.1199	0.98681	0.1199	0.99761
0.10782	0.97761	0.10782	0.98681	0.10782	0.99761
0.10863	0.97761	0.10863	0.98681	0.10863	0.99761
0.10955	0.97761	0.10955	0.98681	0.10955	0.99761
0.11025	0.97761	0.11025	0.98681	0.11025	0.99761
0.1074	0.97756	0.1074	0.98676	0.1074	0.99756
0.10917	0.97756	0.10917	0.98676	0.10917	0.99756
0.10885	0.97756	0.10885	0.98676	0.10885	0.99756
0.10947	0.97756	0.10947	0.98676	0.10947	0.99756
0.1095	0.97756	0.1095	0.98676	0.1095	0.99756
0.10768	0.97752	0.10768	0.98672	0.10768	0.99752
0.10859	0.97752	0.10859	0.98672	0.10859	0.99752
0.10759	0.97752	0.10759	0.98672	0.10759	0.99752
0.108	0.97752	0.108	0.98672	0.108	0.99752
0.10882	0.97752	0.10882	0.98672	0.10882	0.99752
0.10901	0.97747	0.10901	0.98667	0.10901	0.99747
0.10764	0.97747	0.10764	0.98667	0.10764	0.99747
0.10886	0.97747	0.10886	0.98667	0.10886	0.99747
0.10768	0.97747	0.10768	0.98667	0.10768	0.99747
0.11841	0.97743	0.11841	0.98663	0.11841	0.99743
0.10909	0.97743	0.10909	0.98663	0.10909	0.99743
0.10959	0.97743	0.10959	0.98663	0.10959	0.99743
0.10918	0.97743	0.10918	0.98663	0.10918	0.99743
0.1095	0.97743	0.1095	0.98663	0.1095	0.99743
0.10882	0.97743	0.10882	0.98663	0.10882	0.99743
0.10983	0.97739	0.10983	0.98659	0.10983	0.99739
0.10937	0.97739	0.10937	0.98659	0.10937	0.99739
0.10886	0.97739	0.10886	0.98659	0.10886	0.99739
0.1095	0.97739	0.1095	0.98659	0.1095	0.99739
0.10306	0.97734	0.10306	0.98654	0.10306	0.99734
0.10873	0.97734	0.10873	0.98654	0.10873	0.99734
0.10877	0.97734	0.10877	0.98654	0.10877	0.99734
0.10955	0.97734	0.10955	0.98654	0.10955	0.99734
0.10873	0.97734	0.10873	0.98654	0.10873	0.99734
0.10885	0.9773	0.10885	0.9865	0.10885	0.9973
0.10867	0.9773	0.10867	0.9865	0.10867	0.9973
0.11011	0.9773	0.11011	0.9865	0.11011	0.9973
0.10904	0.9773	0.10904	0.9865	0.10904	0.9973
0.10978	0.9773	0.10978	0.9865	0.10978	0.9973
0.11362	0.97725	0.11362	0.98645	0.11362	0.99725
0.11115	0.97725	0.11115	0.98645	0.11115	0.99725
0.11066	0.97725	0.11066	0.98645	0.11066	0.99725
0.11247	0.97725	0.11247	0.98645	0.11247	0.99725
0.1111	0.97721	0.1111	0.98641	0.1111	0.99721
0.11151	0.97721	0.11151	0.98641	0.11151	0.99721
0.11206	0.97721	0.11206	0.98641	0.11206	0.99721
0.11151	0.97721	0.11151	0.98641	0.11151	0.99721
0.11164	0.97721	0.11164	0.98641	0.11164	0.99721
0.10182	0.97717	0.10182	0.98637	0.10182	0.99717
0.11179	0.97717	0.11179	0.98637	0.11179	0.99717
0.11201	0.97717	0.11201	0.98637	0.11201	0.99717
0.11234	0.97717	0.11234	0.98637	0.11234	0.99717
0.11133	0.97717	0.11133	0.98637	0.11133	0.99717
0.11211	0.97712	0.11211	0.98632	0.11211	0.99712
0.11215	0.97712	0.11215	0.98632	0.11215	0.99712
0.11216	0.97712	0.11216	0.98632	0.11216	0.99712
0.11303	0.97712	0.11303	0.98632	0.11303	0.99712
0.11408	0.97712	0.11408	0.98632	0.11408	0.99712
0.1241	0.97708	0.1241	0.98628	0.1241	0.99708
0.11463	0.97708	0.11463	0.98628	0.11463	0.99708
0.11408	0.97708	0.11408	0.98628	0.11408	0.99708
0.11418	0.97708	0.11418	0.98628	0.11418	0.99708
0.11516	0.97708	0.11516	0.98628	0.11516	0.99708
0.11471	0.97704	0.11471	0.98624	0.11471	0.99704
0.11395	0.97704	0.11395	0.98624	0.11395	0.99704
0.11518	0.97704	0.11518	0.98624	0.11518	0.99704
0.1138	0.97704	0.1138	0.98624	0.1138	0.99704
0.10576	0.97699	0.10576	0.98619	0.10576	0.99699
0.1143	0.97699	0.1143	0.98619	0.1143	0.99699
0.11499	0.97699	0.11499	0.98619	0.11499	0.99699
0.11413	0.97699	0.11413	0.98619	0.11413	0.99699
0.11502	0.97699	0.11502	0.98619	0.11502	0.99699
0.11261	0.97695	0.11261	0.98615	0.11261	0.99695
0.11431	0.97695	0.11431	0.98615	0.11431	0.99695
0.11444	0.97695	0.11444	0.98615	0.11444	0.99695
0.11562	0.97695	0.11562	0.98615	0.11562	0.99695
0.11499	0.97695	0.11499	0.98615	0.11499	0.99695
0.12433	0.9769	0.12433	0.9861	0.12433	0.9969
0.11542	0.9769	0.11542	0.9861	0.11542	0.9969
0.11564	0.9769	0.11564	0.9861	0.11564	0.9969
0.11586	0.9769	0.11586	0.9861	0.11586	0.9969
0.116	0.97686	0.116	0.98606	0.116	0.99686
0.11564	0.97686	0.11564	0.98606	0.11564	0.99686
0.11581	0.97686	0.11581	0.98606	0.11581	0.99686
0.11655	0.97686	0.11655	0.98606	0.11655	0.99686
0.11705	0.97686	0.11705	0.98606	0.11705	0.99686
0.10851	0.97682	0.10851	0.98602	0.10851	0.99682
0.11495	0.97682	0.11495	0.98602	0.11495	0.99682
0.1164	0.97682	0.1164	0.98602	0.1164	0.99682
0.1155	0.97682	0.1155	0.98602	0.1155	0.99682
0.11669	0.97682	0.11669	0.98602	0.11669	0.99682
0.1165	0.97677	0.1165	0.98597	0.1165	0.99677
0.11518	0.97677	0.11518	0.98597	0.11518	0.99677
0.11518	0.97677	0.11518	0.98597	0.11518	0.99677
0.11585	0.97677	0.11585	0.98597	0.11585	0.99677
0.11527	0.97677	0.11527	0.98597	0.11527	0.99677
0.12501	0.97673	0.12501	0.98593	0.12501	0.99673
0.11612	0.97673	0.11612	0.98593	0.11612	0.99673
0.11516	0.97673	0.11516	0.98593	0.11516	0.99673
0.11635	0.97673	0.11635	0.98593	0.11635	0.99673
0.11519	0.97668	0.11519	0.98588	0.11519	0.99668
0.11558	0.97668	0.11558	0.98588	0.11558	0.99668
0.11592	0.97668	0.11592	0.98588	0.11592	0.99668
0.11595	0.97668	0.11595	0.98588	0.11595	0.99668
0.115	0.97668	0.115	0.98588	0.115	0.99668
0.11613	0.97668	0.11613	0.98588	0.11613	0.99668
0.11514	0.97664	0.11514	0.98584	0.11514	0.99664
0.11471	0.97664	0.11471	0.98584	0.11471	0.99664
0.11395	0.97664	0.11395	0.98584	0.11395	0.99664
0.11366	0.97664	0.11366	0.98584	0.11366	0.99664
0.11499	0.97664	0.11499	0.98584	0.11499	0.99664
0.11418	0.9766	0.11418	0.9858	0.11418	0.9966
0.11435	0.9766	0.11435	0.9858	0.11435	0.9966
0.11399	0.9766	0.11399	0.9858	0.11399	0.9966
0.11436	0.9766	0.11436	0.9858	0.11436	0.9966
0.1266	0.97655	0.1266	0.98575	0.1266	0.99655
0.11632	0.97655	0.11632	0.98575	0.11632	0.99655
0.11603	0.97655	0.11603	0.98575	0.11603	0.99655
0.11581	0.97655	0.11581	0.98575	0.11581	0.99655
0.11353	0.97651	0.11353	0.98571	0.11353	0.99651
0.11525	0.97651	0.11525	0.98571	0.11525	0.99651
0.11578	0.97651	0.11578	0.98571	0.11578	0.99651
0.11627	0.97651	0.11627	0.98571	0.11627	0.99651
0.11532	0.97651	0.11532	0.98571	0.11532	0.99651
0.11608	0.97651	0.11608	0.98571	0.11608	0.99651
0.10396	0.97647	0.10396	0.98567	0.10396	0.99647
0.11339	0.97647	0.11339	0.98567	0.11339	0.99647
0.11407	0.97647	0.11407	0.98567	0.11407	0.99647
0.11353	0.97647	0.11353	0.98567	0.11353	0.99647
0.11477	0.97647	0.11477	0.98567	0.11477	0.99647
0.11481	0.97642	0.11481	0.98562	0.11481	0.99642
0.11536	0.97642	0.11536	0.98562	0.11536	0.99642
0.11565	0.97642	0.11565	0.98562	0.11565	0.99642
0.11331	0.97642	0.11331	0.98562	0.11331	0.99642
0.11947	0.97638	0.11947	0.98558	0.11947	0.99638
0.11733	0.97638	0.11733	0.98558	0.11733	0.99638
0.11595	0.97638	0.11595	0.98558	0.11595	0.99638
0.11714	0.97638	0.11714	0.98558	0.11714	0.99638
0.11658	0.97638	0.11658	0.98558	0.11658	0.99638
0.11641	0.97633	0.11641	0.98553	0.11641	0.99633
0.11681	0.97633	0.11681	0.98553	0.11681	0.99633
0.11544	0.97633	0.11544	0.98553	0.11544	0.99633
0.1159	0.97633	0.1159	0.98553	0.1159	0.99633
0.10959	0.97629	0.10959	0.98549	0.10959	0.99629
0.11528	0.97629	0.11528	0.98549	0.11528	0.99629
0.11509	0.97629	0.11509	0.98549	0.11509	0.99629
0.11539	0.97629	0.11539	0.98549	0.11539	0.99629
0.11678	0.97629	0.11678	0.98549	0.11678	0.99629
0.11635	0.97629	0.11635	0.98549	0.11635	0.99629
0.11594	0.97625	0.11594	0.98545	0.11594	0.99625
0.1156	0.97625	0.1156	0.98545	0.1156	0.99625
0.11742	0.97625	0.11742	0.98545	0.11742	0.99625
0.11737	0.97625	0.11737	0.98545	0.11737	0.99625
0.12629	0.9762	0.12629	0.9854	0.12629	0.9962
0.11747	0.9762	0.11747	0.9854	0.11747	0.9962
0.11798	0.9762	0.11798	0.9854	0.11798	0.9962
0.1171	0.9762	0.1171	0.9854	0.1171	0.9962
0.11695	0.9762	0.11695	0.9854	0.11695	0.9962
0.11811	0.97616	0.11811	0.98536	0.11811	0.99616
0.11727	0.97616	0.11727	0.98536	0.11727	0.99616
0.11742	0.97616	0.11742	0.98536	0.11742	0.99616
0.11865	0.97616	0.11865	0.98536	0.11865	0.99616
0.11805	0.97616	0.11805	0.98536	0.11805	0.99616
0.11649	0.97611	0.11649	0.98531	0.11649	0.99611
0.1172	0.97611	0.1172	0.98531	0.1172	0.99611
0.11706	0.97611	0.11706	0.98531	0.11706	0.99611
0.11604	0.97611	0.11604	0.98531	0.11604	0.99611
0.11719	0.97607	0.11719	0.98527	0.11719	0.99607
0.11791	0.97607	0.11791	0.98527	0.11791	0.99607
0.11772	0.97607	0.11772	0.98527	0.11772	0.99607
0.11819	0.97607	0.11819	0.98527	0.11819	0.99607
0.11844	0.97607	0.11844	0.98527	0.11844	0.99607
0.12652	0.97603	0.12652	0.98523	0.12652	0.99603
0.11784	0.97603	0.11784	0.98523	0.11784	0.99603
0.11833	0.97603	0.11833	0.98523	0.11833	0.99603
0.11797	0.97603	0.11797	0.98523	0.11797	0.99603
0.11905	0.97603	0.11905	0.98523	0.11905	0.99603
0.11812	0.97598	0.11812	0.98518	0.11812	0.99598
0.11802	0.97598	0.11802	0.98518	0.11802	0.99598
0.11821	0.97598	0.11821	0.98518	0.11821	0.99598
0.11892	0.97598	0.11892	0.98518	0.11892	0.99598
0.11846	0.97598	0.11846	0.98518	0.11846	0.99598
0.11809	0.97594	0.11809	0.98514	0.11809	0.99594
0.11718	0.97594	0.11718	0.98514	0.11718	0.99594
0.11766	0.97594	0.11766	0.98514	0.11766	0.99594
0.11761	0.97594	0.11761	0.98514	0.11761	0.99594
0.11741	0.97594	0.11741	0.98514	0.11741	0.99594
0.1187	0.97589	0.1187	0.98509	0.1187	0.99589
0.11821	0.97589	0.11821	0.98509	0.11821	0.99589
0.11779	0.97589	0.11779	0.98509	0.11779	0.99589
0.11809	0.97589	0.11809	0.98509	0.11809	0.99589
0.12679	0.97585	0.12679	0.98505	0.12679	0.99585
0.12042	0.97585	0.12042	0.98505	0.12042	0.99585
0.11861	0.97585	0.11861	0.98505	0.11861	0.99585
0.11934	0.97585	0.11934	0.98505	0.11934	0.99585
0.11856	0.97585	0.11856	0.98505	0.11856	0.99585
0.11915	0.97585	0.11915	0.98505	0.11915	0.99585
0.1172	0.97581	0.1172	0.98501	0.1172	0.99581
0.11732	0.97581	0.11732	0.98501	0.11732	0.99581
0.11749	0.97581	0.11749	0.98501	0.11749	0.99581
0.11883	0.97581	0.11883	0.98501	0.11883	0.99581
0.11855	0.97581	0.11855	0.98501	0.11855	0.99581
0.1122	0.97576	0.1122	0.98496	0.1122	0.99576
0.11681	0.97576	0.11681	0.98496	0.11681	0.99576
0.11687	0.97576	0.11687	0.98496	0.11687	0.99576
0.11706	0.97576	0.11706	0.98496	0.11706	0.99576
0.11606	0.97576	0.11606	0.98496	0.11606	0.99576
0.11674	0.97576	0.11674	0.98496	0.11674	0.99576
0.11645	0.97572	0.11645	0.98492	0.11645	0.99572
0.11763	0.97572	0.11763	0.98492	0.11763	0.99572
0.11807	0.97572	0.11807	0.98492	0.11807	0.99572
0.11682	0.97572	0.11682	0.98492	0.11682	0.99572
0.11691	0.97572	0.11691	0.98492	0.11691	0.99572
0.11819	0.97572	0.11819	0.98492	0.11819	0.99572
0.11827	0.97568	0.11827	0.98488	0.11827	0.99568
0.1193	0.97568	0.1193	0.98488	0.1193	0.99568
0.12047	0.97568	0.12047	0.98488	0.12047	0.99568
0.11982	0.97568	0.11982	0.98488	0.11982	0.99568
0.11856	0.97568	0.11856	0.98488	0.11856	0.99568
0.11907	0.97563	0.11907	0.98483	0.11907	0.99563
0.11953	0.97563	0.11953	0.98483	0.11953	0.99563
0.11874	0.97563	0.11874	0.98483	0.11874	0.99563
0.11989	0.97563	0.11989	0.98483	0.11989	0.99563
0.1198	0.97563	0.1198	0.98483	0.1198	0.99563
0.11912	0.97563	0.11912	0.98483	0.11912	0.99563
0.11892	0.97559	0.11892	0.98479	0.11892	0.99559
0.11876	0.97559	0.11876	0.98479	0.11876	0.99559
0.1197	0.97559	0.1197	0.98479	0.1197	0.99559
0.12008	0.97559	0.12008	0.98479	0.12008	0.99559
0.12003	0.97559	0.12003	0.98479	0.12003	0.99559
0.11998	0.97554	0.11998	0.98474	0.11998	0.99554
0.12075	0.97554	0.12075	0.98474	0.12075	0.99554
0.12042	0.97554	0.12042	0.98474	0.12042	0.99554
0.12038	0.97554	0.12038	0.98474	0.12038	0.99554
0.12175	0.97554	0.12175	0.98474	0.12175	0.99554
0.13091	0.9755	0.13091	0.9847	0.13091	0.9955
0.12126	0.9755	0.12126	0.9847	0.12126	0.9955
0.12125	0.9755	0.12125	0.9847	0.12125	0.9955
0.12095	0.9755	0.12095	0.9847	0.12095	0.9955
0.12035	0.9755	0.12035	0.9847	0.12035	0.9955
0.12148	0.97546	0.12148	0.98466	0.12148	0.99546
0.12175	0.97546	0.12175	0.98466	0.12175	0.99546
0.12198	0.97546	0.12198	0.98466	0.12198	0.99546
0.12162	0.97546	0.12162	0.98466	0.12162	0.99546
0.12231	0.97546	0.12231	0.98466	0.12231	0.99546
0.11628	0.97541	0.11628	0.98461	0.11628	0.99541
0.11491	0.97541	0.11491	0.98461	0.11491	0.99541
0.12074	0.97541	0.12074	0.98461	0.12074	0.99541
0.11996	0.97541	0.11996	0.98461	0.11996	0.99541
0.1213	0.97541	0.1213	0.98461	0.1213	0.99541
0.12143	0.97541	0.12143	0.98461	0.12143	0.99541
0.12121	0.97537	0.12121	0.98457	0.12121	0.99537
0.12246	0.97537	0.12246	0.98457	0.12246	0.99537
0.12212	0.97537	0.12212	0.98457	0.12212	0.99537
0.12222	0.97537	0.12222	0.98457	0.12222	0.99537
0.12098	0.97537	0.12098	0.98457	0.12098	0.99537
0.12808	0.97532	0.12808	0.98452	0.12808	0.99532
0.12223	0.97532	0.12223	0.98452	0.12223	0.99532
0.12364	0.97532	0.12364	0.98452	0.12364	0.99532
0.12199	0.97532	0.12199	0.98452	0.12199	0.99532
0.12052	0.97532	0.12052	0.98452	0.12052	0.99532
0.12031	0.97532	0.12031	0.98452	0.12031	0.99532
0.12166	0.97528	0.12166	0.98448	0.12166	0.99528
0.12149	0.97528	0.12149	0.98448	0.12149	0.99528
0.12167	0.97528	0.12167	0.98448	0.12167	0.99528
0.1208	0.97528	0.1208	0.98448	0.1208	0.99528
0.12089	0.97528	0.12089	0.98448	0.12089	0.99528
0.11184	0.97524	0.11184	0.98444	0.11184	0.99524
0.12052	0.97524	0.12052	0.98444	0.12052	0.99524
0.1198	0.97524	0.1198	0.98444	0.1198	0.99524
0.12098	0.97524	0.12098	0.98444	0.12098	0.99524
0.1212	0.97524	0.1212	0.98444	0.1212	0.99524
0.11979	0.97519	0.11979	0.98439	0.11979	0.99519
0.12112	0.97519	0.12112	0.98439	0.12112	0.99519
0.12254	0.97519	0.12254	0.98439	0.12254	0.99519
0.12172	0.97519	0.12172	0.98439	0.12172	0.99519
0.12186	0.97519	0.12186	0.98439	0.12186	0.99519
0.12858	0.97515	0.12858	0.98435	0.12858	0.99515
0.12237	0.97515	0.12237	0.98435	0.12237	0.99515
0.12298	0.97515	0.12298	0.98435	0.12298	0.99515
0.12282	0.97515	0.12282	0.98435	0.12282	0.99515
0.12237	0.97515	0.12237	0.98435	0.12237	0.99515
0.1231	0.97511	0.1231	0.98431	0.1231	0.99511
0.12422	0.97511	0.12422	0.98431	0.12422	0.99511
0.1231	0.97511	0.1231	0.98431	0.1231	0.99511
0.12353	0.97511	0.12353	0.98431	0.12353	0.99511
0.12336	0.97511	0.12336	0.98431	0.12336	0.99511
0.12451	0.97511	0.12451	0.98431	0.12451	0.99511
0.12007	0.97506	0.12007	0.98426	0.12007	0.99506
0.1241	0.97506	0.1241	0.98426	0.1241	0.99506
0.12358	0.97506	0.12358	0.98426	0.12358	0.99506
0.12372	0.97506	0.12372	0.98426	0.12372	0.99506
0.12408	0.97506	0.12408	0.98426	0.12408	0.99506
0.12437	0.97502	0.12437	0.98422	0.12437	0.99502
0.12518	0.97502	0.12518	0.98422	0.12518	0.99502
0.12422	0.97502	0.12422	0.98422	0.12422	0.99502
0.12487	0.97502	0.12487	0.98422	0.12487	0.99502
0.12625	0.97502	0.12625	0.98422	0.12625	0.99502
0.12606	0.97497	0.12606	0.98417	0.12606	0.99497
0.12642	0.97497	0.12642	0.98417	0.12642	0.99497
0.12661	0.97497	0.12661	0.98417	0.12661	0.99497
0.12685	0.97497	0.12685	0.98417	0.12685	0.99497
0.12707	0.97493	0.12707	0.98413	0.12707	0.99493
0.12701	0.97493	0.12701	0.98413	0.12701	0.99493
0.12708	0.97493	0.12708	0.98413	0.12708	0.99493
0.12624	0.97493	0.12624	0.98413	0.12624	0.99493
0.12791	0.97493	0.12791	0.98413	0.12791	0.99493
0.12134	0.97489	0.12134	0.98409	0.12134	0.99489
0.12778	0.97489	0.12778	0.98409	0.12778	0.99489
0.12702	0.97489	0.12702	0.98409	0.12702	0.99489
0.12772	0.97489	0.12772	0.98409	0.12772	0.99489
0.12825	0.97489	0.12825	0.98409	0.12825	0.99489
0.12735	0.97489	0.12735	0.98409	0.12735	0.99489
0.12791	0.97484	0.12791	0.98404	0.12791	0.99484
0.12674	0.97484	0.12674	0.98404	0.12674	0.99484
0.12864	0.97484	0.12864	0.98404	0.12864	0.99484
0.12827	0.97484	0.12827	0.98404	0.12827	0.99484
0.14016	0.9748	0.14016	0.984	0.14016	0.9948
0.12931	0.9748	0.12931	0.984	0.12931	0.9948
0.12932	0.9748	0.12932	0.984	0.12932	0.9948
0.12977	0.9748	0.12977	0.984	0.12977	0.9948
0.12964	0.9748	0.12964	0.984	0.12964	0.9948
0.12991	0.97475	0.12991	0.98395	0.12991	0.99475
0.1301	0.97475	0.1301	0.98395	0.1301	0.99475
0.13109	0.97475	0.13109	0.98395	0.13109	0.99475
0.13139	0.97475	0.13139	0.98395	0.13139	0.99475
0.12928	0.97471	0.12928	0.98391	0.12928	0.99471
0.12963	0.97471	0.12963	0.98391	0.12963	0.99471
0.12984	0.97471	0.12984	0.98391	0.12984	0.99471
0.12894	0.97471	0.12894	0.98391	0.12894	0.99471
0.13047	0.97467	0.13047	0.98387	0.13047	0.99467
0.12872	0.97467	0.12872	0.98387	0.12872	0.99467
0.13032	0.97467	0.13032	0.98387	0.13032	0.99467
0.12976	0.97467	0.12976	0.98387	0.12976	0.99467
0.14099	0.97462	0.14099	0.98382	0.14099	0.99462
0.13011	0.97462	0.13011	0.98382	0.13011	0.99462
0.13105	0.97462	0.13105	0.98382	0.13105	0.99462
0.13192	0.97462	0.13192	0.98382	0.13192	0.99462
0.13338	0.97458	0.13338	0.98378	0.13338	0.99458
0.13141	0.97458	0.13141	0.98378	0.13141	0.99458
0.13151	0.97458	0.13151	0.98378	0.13151	0.99458
0.12223	0.97454	0.12223	0.98374	0.12223	0.99454
0.13113	0.97454	0.13113	0.98374	0.13113	0.99454
0.1297	0.97454	0.1297	0.98374	0.1297	0.99454
0.12935	0.97454	0.12935	0.98374	0.12935	0.99454
0.12981	0.97449	0.12981	0.98369	0.12981	0.99449
0.1302	0.97449	0.1302	0.98369	0.1302	0.99449
0.13021	0.97449	0.13021	0.98369	0.13021	0.99449
0.13862	0.97445	0.13862	0.98365	0.13862	0.99445
0.13288	0.97445	0.13288	0.98365	0.13288	0.99445
0.13239	0.97445	0.13239	0.98365	0.13239	0.99445
0.13247	0.9744	0.13247	0.9836	0.13247	0.9944
0.13288	0.9744	0.13288	0.9836	0.13288	0.9944
0.13252	0.9744	0.13252	0.9836	0.13252	0.9944
0.1278	0.97436	0.1278	0.98356	0.1278	0.99436
0.13221	0.97436	0.13221	0.98356	0.13221	0.99436
0.13193	0.97432	0.13193	0.98352	0.13193	0.99432
0.13275	0.97432	0.13275	0.98352	0.13275	0.99432
0.13175	0.97432	0.13175	0.98352	0.13175	0.99432
0.13175	0.97432	0.13175	0.98352	0.13175	0.99432
0.13295	0.97427	0.13295	0.98347	0.13295	0.99427
0.13316	0.97427	0.13316	0.98347	0.13316	0.99427
0.13263	0.97423	0.13263	0.98343	0.13263	0.99423
0.13257	0.97423	0.13257	0.98343	0.13257	0.99423
0.13294	0.97423	0.13294	0.98343	0.13294	0.99423
0.13093	0.97418	0.13093	0.98338	0.13093	0.99418
0.13266	0.97418	0.13266	0.98338	0.13266	0.99418
0.13331	0.97414	0.13331	0.98334	0.13331	0.99414
0.13388	0.97414	0.13388	0.98334	0.13388	0.99414
0.13458	0.97414	0.13458	0.98334	0.13458	0.99414
0.14176	0.9741	0.14176	0.9833	0.14176	0.9941
0.13449	0.9741	0.13449	0.9833	0.13449	0.9941
0.13414	0.97405	0.13414	0.98325	0.13414	0.99405
0.13419	0.97405	0.13419	0.98325	0.13419	0.99405
0.13467	0.97405	0.13467	0.98325	0.13467	0.99405
0.13321	0.97401	0.13321	0.98321	0.13321	0.99401
0.13433	0.97401	0.13433	0.98321	0.13433	0.99401
0.13599	0.97396	0.13599	0.98316	0.13599	0.99396
0.13498	0.97396	0.13498	0.98316	0.13498	0.99396
0.14207	0.97392	0.14207	0.98312	0.14207	0.99392
0.13579	0.97392	0.13579	0.98312	0.13579	0.99392
0.1362	0.97392	0.1362	0.98312	0.1362	0.99392
0.13682	0.97388	0.13682	0.98308	0.13682	0.99388
0.13641	0.97388	0.13641	0.98308	0.13641	0.99388
0.13621	0.97383	0.13621	0.98303	0.13621	0.99383
0.1374	0.97383	0.1374	0.98303	0.1374	0.99383
0.13844	0.97379	0.13844	0.98299	0.13844	0.99379
0.13783	0.97379	0.13783	0.98299	0.13783	0.99379
0.14034	0.97375	0.14034	0.98295	0.14034	0.99375
0.13863	0.97375	0.13863	0.98295	0.13863	0.99375
0.13988	0.9737	0.13988	0.9829	0.13988	0.9937
0.139	0.9737	0.139	0.9829	0.139	0.9937
0.1323	0.97366	0.1323	0.98286	0.1323	0.99366
0.14017	0.97366	0.14017	0.98286	0.14017	0.99366
0.14151	0.97361	0.14151	0.98281	0.14151	0.99361
0.15344	0.97357	0.15344	0.98277	0.15344	0.99357
0.14208	0.97357	0.14208	0.98277	0.14208	0.99357
0.14147	0.97353	0.14147	0.98273	0.14147	0.99353
0.1423	0.97353	0.1423	0.98273	0.1423	0.99353
0.14051	0.97348	0.14051	0.98268	0.14051	0.99348
0.14328	0.97348	0.14328	0.98268	0.14328	0.99348
0.14356	0.97344	0.14356	0.98264	0.14356	0.99344
0.15257	0.97339	0.15257	0.98259	0.15257	0.99339
0.14258	0.97335	0.14258	0.98255	0.14258	0.99335
0.14389	0.97335	0.14389	0.98255	0.14389	0.99335
0.13193	0.97331	0.13193	0.98251	0.13193	0.99331
0.14343	0.97331	0.14343	0.98251	0.14343	0.99331
0.14399	0.97326	0.14399	0.98246	0.14399	0.99326
0.14507	0.97322	0.14507	0.98242	0.14507	0.99322
0.14483	0.97318	0.14483	0.98238	0.14483	0.99318
0.13691	0.97313	0.13691	0.98233	0.13691	0.99313
0.14346	0.97313	0.14346	0.98233	0.14346	0.99313
0.14502	0.97309	0.14502	0.98229	0.14502	0.99309
0.15401	0.97304	0.15401	0.98224	0.15401	0.99304
0.14608	0.973	0.14608	0.9822	0.14608	0.993
0.14675	0.973	0.14675	0.9822	0.14675	0.993
0.14684	0.97291	0.14684	0.98211	0.14684	0.99291
0.14679	0.97291	0.14679	0.98211	0.14679	0.99291
0.14961	0.97287	0.14961	0.98207	0.14961	0.99287
0.14866	0.97282	0.14866	0.98202	0.14866	0.99282
0.14246	0.97278	0.14246	0.98198	0.14246	0.99278
0.14934	0.97274	0.14934	0.98194	0.14934	0.99274
0.1502	0.97274	0.1502	0.98194	0.1502	0.99274
0.15216	0.97265	0.15216	0.98185	0.15216	0.99265
0.15178	0.97265	0.15178	0.98185	0.15178	0.99265
0.15066	0.97261	0.15066	0.98181	0.15066	0.99261
0.15041	0.97256	0.15041	0.98176	0.15041	0.99256
0.15469	0.97252	0.15469	0.98172	0.15469	0.99252
0.1542	0.97247	0.1542	0.98167	0.1542	0.99247
0.1527	0.97243	0.1527	0.98163	0.1527	0.99243
0.15266	0.97239	0.15266	0.98159	0.15266	0.99239
0.15425	0.97234	0.15425	0.98154	0.15425	0.99234
0.15362	0.9723	0.15362	0.9815	0.15362	0.9923
0.14649	0.97225	0.14649	0.98145	0.14649	0.99225
0.15378	0.97221	0.15378	0.98141	0.15378	0.99221
0.16294	0.97217	0.16294	0.98137	0.16294	0.99217
0.15273	0.97208	0.15273	0.98128	0.15273	0.99208
0.14835	0.97208	0.14835	0.98128	0.14835	0.99208
0.1636	0.97199	0.1636	0.98119	0.1636	0.99199
0.15764	0.97199	0.15764	0.98119	0.15764	0.99199
0.15085	0.9719	0.15085	0.9811	0.15085	0.9919
0.15764	0.97186	0.15764	0.98106	0.15764	0.99186
0.16254	0.97182	0.16254	0.98102	0.16254	0.99182
0.15956	0.97177	0.15956	0.98097	0.15956	0.99177
0.15828	0.97173	0.15828	0.98093	0.15828	0.99173
0.15837	0.97168	0.15837	0.98088	0.15837	0.99168
0.16212	0.9716	0.16212	0.9808	0.16212	0.9916
0.15344	0.97155	0.15344	0.98075	0.15344	0.99155
0.16072	0.97151	0.16072	0.98071	0.16072	0.99151
0.16926	0.97146	0.16926	0.98066	0.16926	0.99146
0.16334	0.97142	0.16334	0.98062	0.16334	0.99142
0.16177	0.97133	0.16177	0.98053	0.16177	0.99133
0.17153	0.97129	0.17153	0.98049	0.17153	0.99129
0.15823	0.9712	0.15823	0.9804	0.15823	0.9912
0.16087	0.9712	0.16087	0.9804	0.16087	0.9912
0.172	0.97111	0.172	0.98031	0.172	0.99111
0.16346	0.97107	0.16346	0.98027	0.16346	0.99107
0.163	0.97098	0.163	0.98018	0.163	0.99098
0.17134	0.97094	0.17134	0.98014	0.17134	0.99094
0.15368	0.97085	0.15368	0.98005	0.15368	0.99085
0.16182	0.97081	0.16182	0.98001	0.16182	0.99081
0.17349	0.97076	0.17349	0.97996	0.17349	0.99076
0.16403	0.97072	0.16403	0.97992	0.16403	0.99072
0.16295	0.97068	0.16295	0.97988	0.16295	0.99068
0.16807	0.97054	0.16807	0.97974	0.16807	0.99054
0.16728	0.97054	0.16728	0.97974	0.16728	0.99054
0.17347	0.97041	0.17347	0.97961	0.17347	0.99041
0.16972	0.97037	0.16972	0.97957	0.16972	0.99037
0.1663	0.97032	0.1663	0.97952	0.1663	0.99032
0.17471	0.97024	0.17471	0.97944	0.17471	0.99024
0.16632	0.97015	0.16632	0.97935	0.16632	0.99015
0.17271	0.97011	0.17271	0.97931	0.17271	0.99011
0.17622	0.97002	0.17622	0.97922	0.17622	0.99002
0.1689	0.96997	0.1689	0.97917	0.1689	0.98997
0.17469	0.96993	0.17469	0.97913	0.17469	0.98993
0.17712	0.96984	0.17712	0.97904	0.17712	0.98984
0.16989	0.9698	0.16989	0.979	0.16989	0.9898
0.1903	0.96971	0.1903	0.97891	0.1903	0.98971
0.17928	0.96967	0.17928	0.97887	0.17928	0.98967
0.17833	0.96958	0.17833	0.97878	0.17833	0.98958
0.18692	0.96954	0.18692	0.97874	0.18692	0.98954
0.17673	0.9694	0.17673	0.9786	0.17673	0.9894
0.17934	0.9694	0.17934	0.9786	0.17934	0.9894
0.17036	0.96927	0.17036	0.97847	0.17036	0.98927
0.17999	0.96923	0.17999	0.97843	0.17999	0.98923
0.18114	0.96914	0.18114	0.97834	0.18114	0.98914
0.17176	0.9691	0.17176	0.9783	0.17176	0.9891
0.18717	0.96901	0.18717	0.97821	0.18717	0.98901
0.17311	0.96892	0.17311	0.97812	0.17311	0.98892
0.18267	0.96888	0.18267	0.97808	0.18267	0.98888
0.18552	0.96879	0.18552	0.97799	0.18552	0.98879
0.17865	0.9687	0.17865	0.9779	0.17865	0.9887
0.19021	0.96861	0.19021	0.97781	0.19021	0.98861
0.17944	0.96857	0.17944	0.97777	0.17944	0.98857
0.19679	0.96848	0.19679	0.97768	0.19679	0.98848
0.1881	0.96844	0.1881	0.97764	0.1881	0.98844
0.19588	0.96831	0.19588	0.97751	0.19588	0.98831
0.18855	0.96826	0.18855	0.97746	0.18855	0.98826
0.18951	0.96818	0.18951	0.97738	0.18951	0.98818
0.19185	0.96809	0.19185	0.97729	0.19185	0.98809
0.19067	0.968	0.19067	0.9772	0.19067	0.988
0.19919	0.96796	0.19919	0.97716	0.19919	0.98796
0.19048	0.96782	0.19048	0.97702	0.19048	0.98782
0.20003	0.96778	0.20003	0.97698	0.20003	0.98778
0.18419	0.96765	0.18419	0.97685	0.18419	0.98765
0.20362	0.96761	0.20362	0.97681	0.20362	0.98761
0.19399	0.96756	0.19399	0.97676	0.19399	0.98756
0.20083	0.96743	0.20083	0.97663	0.20083	0.98743
0.19506	0.96739	0.19506	0.97659	0.19506	0.98739
0.20471	0.96725	0.20471	0.97645	0.20471	0.98725
0.19613	0.96721	0.19613	0.97641	0.19613	0.98721
0.20288	0.96708	0.20288	0.97628	0.20288	0.98708
0.19633	0.96704	0.19633	0.97624	0.19633	0.98704
0.20668	0.9669	0.20668	0.9761	0.20668	0.9869
0.19689	0.96686	0.19689	0.97606	0.19689	0.98686
0.20683	0.96673	0.20683	0.97593	0.20683	0.98673
0.19277	0.96664	0.19277	0.97584	0.19277	0.98664
0.20721	0.96655	0.20721	0.97575	0.20721	0.98655
0.19178	0.96646	0.19178	0.97566	0.19178	0.98646
0.19892	0.96642	0.19892	0.97562	0.19892	0.98642
0.19221	0.96629	0.19221	0.97549	0.19221	0.98629
0.20154	0.96625	0.20154	0.97545	0.20154	0.98625
0.19543	0.96611	0.19543	0.97531	0.19543	0.98611
0.20355	0.96607	0.20355	0.97527	0.20355	0.98607
0.1946	0.96594	0.1946	0.97514	0.1946	0.98594
0.21407	0.96585	0.21407	0.97505	0.21407	0.98585
0.19753	0.96572	0.19753	0.97492	0.19753	0.98572
0.21406	0.96568	0.21406	0.97488	0.21406	0.98568
0.21296	0.9655	0.21296	0.9747	0.21296	0.9855
0.21099	0.96546	0.21099	0.97466	0.21099	0.98546
0.2145	0.96533	0.2145	0.97452	0.2145	0.98532
0.20875	0.96528	0.20875	0.97448	0.20875	0.98528
0.21678	0.96515	0.21678	0.97435	0.21678	0.98515
0.20092	0.96506	0.20092	0.97426	0.20092	0.98506
0.20802	0.96502	0.20802	0.97422	0.20802	0.98502
0.20069	0.96484	0.20069	0.97404	0.20069	0.98484
0.21771	0.9648	0.21771	0.974	0.21771	0.9848
0.20824	0.96467	0.20824	0.97387	0.20824	0.98467
0.22181	0.96458	0.22181	0.97378	0.22181	0.98458
0.21539	0.96445	0.21539	0.97365	0.21539	0.98445
0.21427	0.9644	0.21427	0.9736	0.21427	0.9844
0.22568	0.96423	0.22568	0.97343	0.22568	0.98423
0.20867	0.96418	0.20867	0.97338	0.20867	0.98418
0.21776	0.96405	0.21776	0.97325	0.21776	0.98405
0.20932	0.96396	0.20932	0.97316	0.20932	0.98396
0.21108	0.96383	0.21108	0.97303	0.21108	0.98383
0.22252	0.96375	0.22252	0.97295	0.22252	0.98375
0.21285	0.96361	0.21285	0.97281	0.21285	0.98361
0.232	0.96353	0.232	0.97273	0.232	0.98353
0.23118	0.96339	0.23118	0.97259	0.23118	0.98339
0.22366	0.96335	0.22366	0.97255	0.22366	0.98335
0.22087	0.96326	0.22087	0.97246	0.22087	0.98326
0.21682	0.96309	0.21682	0.97229	0.21682	0.98309
0.23559	0.96304	0.23559	0.97224	0.23559	0.98304
0.23355	0.96287	0.23355	0.97207	0.23355	0.98287
0.23018	0.96282	0.23018	0.97202	0.23018	0.98283
0.23666	0.96265	0.23666	0.97185	0.23666	0.98265
0.22106	0.96261	0.22106	0.97181	0.22106	0.98261
0.22316	0.96243	0.22316	0.97163	0.22316	0.98243
0.23509	0.96234	0.23509	0.97154	0.23509	0.98234
0.22149	0.96221	0.22149	0.97141	0.22149	0.98221
0.2429	0.96217	0.2429	0.97137	0.2429	0.98217
0.24244	0.96199	0.24244	0.97119	0.24244	0.98199
0.23642	0.96195	0.23642	0.97115	0.23642	0.98195
0.24414	0.96177	0.24414	0.97097	0.24414	0.98177
0.22926	0.96168	0.22926	0.97088	0.22926	0.98168
0.22922	0.96155	0.22922	0.97075	0.22922	0.98155
0.24402	0.96147	0.24402	0.97067	0.24402	0.98147
0.22954	0.96138	0.22954	0.97058	0.22954	0.98138
0.24264	0.96125	0.24264	0.97045	0.24264	0.98125
0.23588	0.96116	0.23588	0.97036	0.23588	0.98116
0.23285	0.96098	0.23285	0.97018	0.23285	0.98098
0.25359	0.96089	0.25359	0.97009	0.25359	0.98089
0.2349	0.96081	0.2349	0.97001	0.2349	0.98081
0.23519	0.96063	0.23519	0.96983	0.23519	0.98063
0.25396	0.96059	0.25396	0.96979	0.25396	0.98059
0.2587	0.96041	0.2587	0.96961	0.2587	0.98041
0.24333	0.96032	0.24333	0.96952	0.24333	0.98032
0.24609	0.96015	0.24609	0.96935	0.24609	0.98015
0.25798	0.96006	0.25798	0.96926	0.25798	0.98006
0.24871	0.95997	0.24871	0.96917	0.24871	0.97997
0.24715	0.9598	0.24715	0.969	0.24715	0.9798
0.24628	0.95975	0.24628	0.96895	0.24628	0.97975
0.26313	0.95967	0.26313	0.96887	0.26313	0.97967
0.26257	0.95949	0.26257	0.96869	0.26257	0.97949
0.24962	0.9594	0.24962	0.9686	0.24962	0.9794
0.25047	0.95923	0.25047	0.96843	0.25047	0.97923
0.26994	0.95914	0.26994	0.96834	0.26994	0.97914
0.25476	0.95905	0.25476	0.96825	0.25476	0.97905
0.25259	0.95892	0.25259	0.96812	0.25259	0.97892
0.27305	0.95883	0.27305	0.96803	0.27305	0.97883
0.27466	0.95866	0.27466	0.96786	0.27466	0.97866
0.25166	0.95857	0.25166	0.96777	0.25166	0.97857
0.27249	0.95848	0.27249	0.96768	0.27249	0.97848
0.27177	0.95826	0.27177	0.96746	0.27177	0.97826
0.26248	0.95822	0.26248	0.96742	0.26248	0.97822
0.25781	0.95804	0.25781	0.96724	0.25781	0.97804
0.27721	0.95791	0.27721	0.96711	0.27721	0.97791
0.27591	0.95778	0.27591	0.96698	0.27591	0.97778
0.2634	0.95769	0.2634	0.96689	0.2634	0.97769
0.26393	0.95765	0.26393	0.96685	0.26393	0.97765
0.26659	0.95752	0.26659	0.96672	0.26659	0.97752
0.28363	0.95739	0.28363	0.96659	0.28363	0.97739
0.2697	0.9573	0.2697	0.9665	0.2697	0.9773
0.27021	0.95717	0.27021	0.96637	0.27021	0.97717
0.2897	0.95708	0.2897	0.96628	0.2897	0.97708
0.29136	0.95686	0.29136	0.96606	0.29136	0.97686
0.27005	0.95677	0.27005	0.96597	0.27005	0.97677
0.27212	0.95664	0.27212	0.96584	0.27212	0.97664
0.29111	0.95651	0.29111	0.96571	0.29111	0.97651
0.27609	0.95642	0.27609	0.96562	0.27609	0.97642
0.27517	0.95629	0.27517	0.96549	0.27517	0.97629
0.2965	0.95616	0.2965	0.96536	0.2965	0.97616
0.27567	0.95607	0.27567	0.96527	0.27567	0.97607
0.28434	0.95589	0.28434	0.96509	0.28434	0.97589
0.29753	0.95581	0.29753	0.96501	0.29753	0.97581
0.29588	0.95563	0.29588	0.96483	0.29588	0.97563
0.2979	0.9555	0.2979	0.9647	0.2979	0.9755
0.28272	0.95541	0.28272	0.96461	0.28272	0.97541
0.28583	0.95524	0.28583	0.96444	0.28583	0.97524
0.30334	0.95515	0.30334	0.96435	0.30334	0.97515
0.302	0.95493	0.302	0.96413	0.302	0.97493
0.28984	0.95489	0.28984	0.96409	0.28984	0.97489
0.30472	0.9548	0.30472	0.964	0.30472	0.9748
0.30803	0.95458	0.30803	0.96378	0.30803	0.97458
0.2857	0.95449	0.2857	0.96369	0.2857	0.97449
0.28745	0.95432	0.28745	0.96352	0.28745	0.97432
0.30309	0.95418	0.30309	0.96338	0.30309	0.97418
0.30816	0.95405	0.30816	0.96325	0.30816	0.97405
0.30975	0.95392	0.30975	0.96312	0.30975	0.97392
0.2946	0.95383	0.2946	0.96303	0.2946	0.97383
0.30274	0.95361	0.30274	0.96281	0.30274	0.97361
0.31849	0.95357	0.31849	0.96277	0.31849	0.97357
0.30618	0.95344	0.30618	0.96264	0.30618	0.97344
0.30467	0.95326	0.30467	0.96246	0.30467	0.97326
0.32212	0.95318	0.32212	0.96238	0.32212	0.97318
0.32499	0.953	0.32499	0.9622	0.32499	0.973
0.32115	0.95287	0.32115	0.96207	0.32115	0.97287
0.32189	0.95269	0.32189	0.96189	0.32189	0.97269
0.30913	0.95261	0.30913	0.96181	0.30913	0.97261
0.32726	0.95252	0.32726	0.96172	0.32726	0.97252
0.32647	0.9523	0.32647	0.9615	0.32647	0.9723
0.31469	0.95225	0.31469	0.96145	0.31469	0.97225
0.32819	0.95212	0.32819	0.96132	0.32819	0.97212
0.31262	0.9519	0.31262	0.9611	0.31262	0.9719
0.32724	0.95182	0.32724	0.96102	0.32724	0.97182
0.33037	0.95164	0.33037	0.96084	0.33037	0.97164
0.31168	0.95151	0.31168	0.96071	0.31168	0.97151
0.32627	0.95142	0.32627	0.96062	0.32627	0.97142
0.328	0.95125	0.328	0.96045	0.328	0.97125
0.3225	0.95111	0.3225	0.96031	0.3225	0.97111
0.33177	0.9509	0.33177	0.9601	0.33177	0.9709
0.31324	0.95081	0.31324	0.96001	0.31324	0.97081
0.33265	0.95072	0.33265	0.95992	0.33265	0.97072
0.3199	0.9505	0.3199	0.9597	0.3199	0.9705
0.33667	0.95041	0.33667	0.95961	0.33667	0.97041
0.3381	0.95019	0.3381	0.95939	0.3381	0.97019
0.32552	0.95011	0.32552	0.95931	0.32552	0.97011
0.33226	0.94997	0.33226	0.95917	0.33226	0.96997
0.32978	0.9498	0.32978	0.959	0.32978	0.9698
0.34655	0.94971	0.34655	0.95891	0.34655	0.96971
0.34635	0.94949	0.34635	0.95869	0.34635	0.96949
0.33041	0.9494	0.33041	0.9586	0.33041	0.9694
0.33946	0.94927	0.33946	0.95847	0.33946	0.96927
0.33318	0.94905	0.33318	0.95825	0.33318	0.96905
0.3472	0.94901	0.3472	0.95821	0.3472	0.96901
0.3497	0.94875	0.3497	0.95795	0.3497	0.96875
0.35057	0.94866	0.35057	0.95786	0.35057	0.96866
0.35267	0.94848	0.35267	0.95768	0.35267	0.96848
0.33917	0.94835	0.33917	0.95755	0.33917	0.96835
0.35741	0.94822	0.35741	0.95742	0.35741	0.96822
0.34804	0.94804	0.34804	0.95724	0.34804	0.96804
0.36226	0.94796	0.36226	0.95716	0.36226	0.96796
0.34594	0.94783	0.34594	0.95703	0.34594	0.96782
0.3623	0.94761	0.3623	0.95681	0.3623	0.96761
0.35214	0.94752	0.35214	0.95672	0.35214	0.96752
0.34824	0.9473	0.34824	0.9565	0.34824	0.9673
0.35705	0.94717	0.35705	0.95637	0.35705	0.96717
0.35014	0.94699	0.35014	0.95619	0.35014	0.96699
0.36378	0.94686	0.36378	0.95606	0.36378	0.96686
0.34907	0.94677	0.34907	0.95597	0.34907	0.96677
0.35992	0.94655	0.35992	0.95575	0.35992	0.96655
0.35761	0.94646	0.35761	0.95566	0.35761	0.96646
0.37336	0.94633	0.37336	0.95553	0.37336	0.96633
0.37623	0.94616	0.37623	0.95536	0.37623	0.96616
0.37223	0.94603	0.37223	0.95523	0.37223	0.96603
0.37865	0.94581	0.37865	0.95501	0.37865	0.96581
0.36152	0.94572	0.36152	0.95492	0.36152	0.96572
0.37951	0.94546	0.37951	0.95466	0.37951	0.96546
0.3615	0.94537	0.3615	0.95457	0.3615	0.96537
0.36785	0.94524	0.36785	0.95444	0.36785	0.96524
0.37129	0.94506	0.37129	0.95426	0.37129	0.96506
0.38356	0.94493	0.38356	0.95413	0.38356	0.96493
0.38528	0.94475	0.38528	0.95395	0.38528	0.96475
0.38694	0.94462	0.38694	0.95382	0.38694	0.96462
0.37208	0.94449	0.37208	0.95369	0.37208	0.96449
0.39176	0.94427	0.39176	0.95347	0.39176	0.96427
0.37576	0.94418	0.37576	0.95338	0.37576	0.96418
0.37449	0.94397	0.37449	0.95317	0.37449	0.96397
0.37567	0.94383	0.37567	0.95303	0.37567	0.96383
0.3949	0.9437	0.3949	0.9529	0.3949	0.9637
0.39829	0.94353	0.39829	0.95273	0.39829	0.96353
0.39492	0.9434	0.39492	0.9526	0.39492	0.9634
0.38084	0.94326	0.38084	0.95246	0.38084	0.96326
0.38602	0.94304	0.38602	0.95224	0.38602	0.96304
0.38137	0.94296	0.38137	0.95216	0.38137	0.96296
0.39829	0.94269	0.39829	0.95189	0.39829	0.96269
0.40084	0.94261	0.40084	0.95181	0.40084	0.96261
0.38924	0.94239	0.38924	0.95159	0.38924	0.96239
0.39451	0.94225	0.39451	0.95145	0.39451	0.96225
0.40169	0.94217	0.40169	0.95137	0.40169	0.96217
0.40717	0.94195	0.40717	0.95115	0.40717	0.96195
0.40795	0.94182	0.40795	0.95102	0.40795	0.96182
0.41247	0.9416	0.41247	0.9508	0.41247	0.9616
0.40364	0.94146	0.40364	0.95066	0.40364	0.96146
0.39623	0.94133	0.39623	0.95053	0.39623	0.96133
0.39942	0.94116	0.39942	0.95036	0.39942	0.96116
0.40082	0.94103	0.40082	0.95023	0.40082	0.96103
0.40773	0.94076	0.40773	0.94996	0.40773	0.96076
0.40138	0.94068	0.40138	0.94988	0.40138	0.96068
0.4196	0.94059	0.4196	0.94979	0.4196	0.96059
0.41199	0.94033	0.41199	0.94953	0.41199	0.96032
0.42365	0.94019	0.42365	0.94939	0.42365	0.96019
0.42592	0.94002	0.42592	0.94922	0.42592	0.96002
0.42223	0.93989	0.42223	0.94909	0.42223	0.95989
0.40942	0.93975	0.40942	0.94895	0.40942	0.95975
0.41626	0.93954	0.41626	0.94874	0.41626	0.95954
0.41412	0.9394	0.41412	0.9486	0.41412	0.9594
0.43071	0.93918	0.43071	0.94838	0.43071	0.95918
0.41716	0.9391	0.41716	0.9483	0.41716	0.9591
0.43198	0.93883	0.43198	0.94803	0.43198	0.95883
0.41645	0.9387	0.41645	0.9479	0.41645	0.9587
0.43406	0.93861	0.43406	0.94781	0.43406	0.95861
0.4238	0.93835	0.4238	0.94755	0.4238	0.95835
0.43994	0.93826	0.43994	0.94746	0.43994	0.95826
0.423	0.93804	0.423	0.94724	0.423	0.95804
0.43978	0.93791	0.43978	0.94711	0.43978	0.95791
0.43794	0.93778	0.43794	0.94698	0.43794	0.95778
0.44125	0.93756	0.44125	0.94676	0.44125	0.95756
0.43634	0.93743	0.43634	0.94663	0.43634	0.95743
0.43947	0.93717	0.43947	0.94637	0.43947	0.95717
0.43409	0.93708	0.43409	0.94628	0.43409	0.95708
0.43164	0.93695	0.43164	0.94615	0.43164	0.95695
0.44636	0.93668	0.44636	0.94588	0.44636	0.95668
0.4374	0.93655	0.4374	0.94575	0.4374	0.95655
0.45033	0.93633	0.45033	0.94553	0.45033	0.95633
0.44086	0.9362	0.44086	0.9454	0.44086	0.9562
0.45601	0.93598	0.45601	0.94518	0.45601	0.95598
0.44528	0.93585	0.44528	0.94505	0.44528	0.95585
0.44146	0.93572	0.44146	0.94492	0.44146	0.95572
0.44414	0.9355	0.44414	0.9447	0.44414	0.9555
0.44539	0.93537	0.44539	0.94457	0.44539	0.95537
0.45232	0.93524	0.45232	0.94444	0.45232	0.95524
0.44575	0.93502	0.44575	0.94422	0.44575	0.95502
0.46012	0.93489	0.46012	0.94409	0.46012	0.95489
0.455	0.93462	0.455	0.94382	0.455	0.95462
0.44868	0.93449	0.44868	0.94369	0.44868	0.95449
0.45932	0.93427	0.45932	0.94347	0.45932	0.95427
0.4521	0.93414	0.4521	0.94334	0.4521	0.95414
0.45997	0.93401	0.45997	0.94321	0.45997	0.95401
0.4542	0.93379	0.4542	0.94299	0.4542	0.95379
0.45592	0.93366	0.45592	0.94286	0.45592	0.95366
0.47405	0.93335	0.47405	0.94255	0.47405	0.95335
0.45974	0.93326	0.45974	0.94246	0.45974	0.95326
0.47224	0.93313	0.47224	0.94233	0.47224	0.95313
0.46828	0.93287	0.46828	0.94207	0.46828	0.95287
0.46672	0.93278	0.46672	0.94198	0.46672	0.95278
0.47725	0.93252	0.47725	0.94172	0.47725	0.95252
0.46696	0.93234	0.46696	0.94154	0.46696	0.95234
0.46347	0.93221	0.46347	0.94141	0.46347	0.95221
0.47536	0.93199	0.47536	0.94119	0.47536	0.95199
0.46598	0.93186	0.46598	0.94106	0.46598	0.95186
0.47876	0.93155	0.47876	0.94075	0.47876	0.95155
0.46802	0.93147	0.46802	0.94067	0.46802	0.95147
0.47077	0.93133	0.47077	0.94053	0.47077	0.95133
0.48547	0.93107	0.48547	0.94027	0.48547	0.95107
0.47047	0.93098	0.47047	0.94018	0.47047	0.95098
0.47997	0.93068	0.47997	0.93988	0.47997	0.95068
0.49045	0.93054	0.49045	0.93974	0.49045	0.95054
0.49142	0.93037	0.49142	0.93957	0.49142	0.95037
0.48619	0.93015	0.48619	0.93935	0.48619	0.95015
0.49488	0.93002	0.49488	0.93922	0.49488	0.95002
0.47799	0.92975	0.47799	0.93895	0.47799	0.94975
0.48704	0.92962	0.48704	0.93882	0.48704	0.94962
0.49669	0.92949	0.49669	0.93869	0.49669	0.94949
0.48678	0.92918	0.48678	0.93838	0.48678	0.94918
0.49272	0.9291	0.49272	0.9383	0.49272	0.9491
0.49784	0.92879	0.49784	0.93799	0.49784	0.94879
0.48947	0.92866	0.48947	0.93786	0.48947	0.94866
0.48462	0.92853	0.48462	0.93773	0.48462	0.94853
0.50177	0.92826	0.50177	0.93746	0.50177	0.94826
0.50125	0.92813	0.50125	0.93733	0.50125	0.94813
0.49325	0.92782	0.49325	0.93702	0.49325	0.94783
0.50719	0.92769	0.50719	0.93689	0.50719	0.94769
0.51182	0.92756	0.51182	0.93676	0.51182	0.94756
0.50479	0.92725	0.50479	0.93645	0.50479	0.94725
0.50042	0.92712	0.50042	0.93632	0.50042	0.94712
0.51844	0.92686	0.51844	0.93606	0.51844	0.94686
0.51472	0.92673	0.51472	0.93593	0.51472	0.94673
0.50881	0.92655	0.50881	0.93575	0.50881	0.94655
0.52531	0.92633	0.52531	0.93553	0.52531	0.94633
0.52591	0.92616	0.52591	0.93536	0.52591	0.94616
0.50989	0.9259	0.50989	0.9351	0.50989	0.9459
0.5293	0.92581	0.5293	0.93501	0.5293	0.94581
0.5309	0.92563	0.5309	0.93483	0.5309	0.94563
0.51574	0.92537	0.51574	0.93457	0.51574	0.94537
0.52976	0.92524	0.52976	0.93444	0.52976	0.94524
0.53751	0.92497	0.53751	0.93417	0.53751	0.94497
0.53062	0.9248	0.53062	0.934	0.53062	0.9448
0.53402	0.92471	0.53402	0.93391	0.53402	0.94471
0.54212	0.9244	0.54212	0.9336	0.54212	0.9444
0.53863	0.92427	0.53863	0.93347	0.53863	0.94427
0.55372	0.92405	0.55372	0.93325	0.55372	0.94405
0.55271	0.92392	0.55271	0.93312	0.55271	0.94392
0.54754	0.92375	0.54754	0.93295	0.54754	0.94375
0.55862	0.92353	0.55862	0.93273	0.55862	0.94353
0.55401	0.9234	0.55401	0.9326	0.55401	0.9434
0.54972	0.92313	0.54972	0.93233	0.54972	0.94313
0.56443	0.92296	0.56443	0.93216	0.56443	0.94296
0.55494	0.92274	0.55494	0.93194	0.55494	0.94274
0.56273	0.92261	0.56273	0.93181	0.56273	0.94261
0.56756	0.92247	0.56756	0.93167	0.56756	0.94247
0.55363	0.92225	0.55363	0.93145	0.55363	0.94225
0.56981	0.92212	0.56981	0.93132	0.56981	0.94212
0.56699	0.92195	0.56699	0.93115	0.56699	0.94195
0.5655	0.92173	0.5655	0.93093	0.5655	0.94173
0.5739	0.9216	0.5739	0.9308	0.5739	0.9416
0.56058	0.92129	0.56058	0.93049	0.56058	0.94129
0.56304	0.9212	0.56304	0.9304	0.56304	0.9412
0.57124	0.92094	0.57124	0.93014	0.57124	0.94094
0.56033	0.92076	0.56033	0.92996	0.56033	0.94076
0.55907	0.92063	0.55907	0.92983	0.55907	0.94063
0.56925	0.92041	0.56925	0.92961	0.56925	0.94041
0.56766	0.92024	0.56766	0.92944	0.56766	0.94024
0.56006	0.92011	0.56006	0.92931	0.56006	0.94011
0.57811	0.91984	0.57811	0.92904	0.57811	0.93984
0.57321	0.91971	0.57321	0.92891	0.57321	0.93971
0.56373	0.9194	0.56373	0.9286	0.56373	0.9394
0.5812	0.91932	0.5812	0.92852	0.5812	0.93932
0.57118	0.91901	0.57118	0.92821	0.57118	0.93901
0.56923	0.91888	0.56923	0.92808	0.56923	0.93888
0.57831	0.91875	0.57831	0.92795	0.57831	0.93875
0.57628	0.91848	0.57628	0.92768	0.57628	0.93848
0.57348	0.91835	0.57348	0.92755	0.57348	0.93835
0.58943	0.91809	0.58943	0.92729	0.58943	0.93809
0.58423	0.91796	0.58423	0.92716	0.58423	0.93796
0.57763	0.91783	0.57763	0.92703	0.57763	0.93782
0.58488	0.91752	0.58488	0.92672	0.58488	0.93752
0.58978	0.91743	0.58978	0.92663	0.58978	0.93743
0.58335	0.91712	0.58335	0.92632	0.58335	0.93712
0.58593	0.91695	0.58593	0.92615	0.58593	0.93695
0.59479	0.91682	0.59479	0.92602	0.59479	0.93682
0.59095	0.91655	0.59095	0.92575	0.59095	0.93655
0.5894	0.91642	0.5894	0.92562	0.5894	0.93642
0.59595	0.91629	0.59595	0.92549	0.59595	0.93629
0.60012	0.91603	0.60012	0.92523	0.60012	0.93603
0.59448	0.91589	0.59448	0.92509	0.59448	0.93589
0.60825	0.91559	0.60825	0.92479	0.60825	0.93559
0.61685	0.91546	0.61685	0.92466	0.61685	0.93546
0.60311	0.91519	0.60311	0.92439	0.60311	0.93519
0.61597	0.91506	0.61597	0.92426	0.61597	0.93506
0.62819	0.91493	0.62819	0.92413	0.62819	0.93493
0.61016	0.91467	0.61016	0.92387	0.61016	0.93467
0.61957	0.91454	0.61957	0.92374	0.61957	0.93454
0.63453	0.9144	0.63453	0.9236	0.63453	0.9344
0.61808	0.91414	0.61808	0.92334	0.61808	0.93414
0.62957	0.91401	0.62957	0.92321	0.62957	0.93401
0.63489	0.91375	0.63489	0.92295	0.63489	0.93375
0.61981	0.91361	0.61981	0.92281	0.61981	0.93361
0.64057	0.91335	0.64057	0.92255	0.64057	0.93335
0.64183	0.91322	0.64183	0.92242	0.64183	0.93322
0.63323	0.91304	0.63323	0.92224	0.63323	0.93304
0.6512	0.91282	0.6512	0.92202	0.6512	0.93283
0.64593	0.91269	0.64593	0.92189	0.64593	0.93269
0.64678	0.91243	0.64678	0.92163	0.64678	0.93243
0.65273	0.9123	0.65273	0.9215	0.65273	0.9323
0.64906	0.91217	0.64906	0.92137	0.64906	0.93217
0.64416	0.9119	0.64416	0.9211	0.64416	0.9319
0.65894	0.91182	0.65894	0.92102	0.65894	0.93182
0.64464	0.91151	0.64464	0.92071	0.64464	0.93151
0.65424	0.91138	0.65424	0.92058	0.65424	0.93138
0.66264	0.91129	0.66264	0.92049	0.66264	0.93129
0.65501	0.91103	0.65501	0.92023	0.65501	0.93103
0.66942	0.91085	0.66942	0.92005	0.66942	0.93085
0.6586	0.91063	0.6586	0.91983	0.6586	0.93063
0.66869	0.9105	0.66869	0.9197	0.66869	0.9305
0.67799	0.91037	0.67799	0.91957	0.67799	0.93037
0.66975	0.91015	0.66975	0.91935	0.66975	0.93015
0.68255	0.91002	0.68255	0.91922	0.68255	0.93002
0.67124	0.90971	0.67124	0.91891	0.67124	0.92971
0.66798	0.90958	0.66798	0.91878	0.66798	0.92958
0.68569	0.90949	0.68569	0.91869	0.68569	0.92949
0.67407	0.90923	0.67407	0.91843	0.67407	0.92923
0.67669	0.9091	0.67669	0.9183	0.67669	0.9291
0.67325	0.90888	0.67325	0.91808	0.67325	0.92888
0.67745	0.90875	0.67745	0.91795	0.67745	0.92875
0.69078	0.90861	0.69078	0.91781	0.69078	0.92861
0.67946	0.90835	0.67946	0.91755	0.67946	0.92835
0.69101	0.90822	0.69101	0.91742	0.69101	0.92822
0.68541	0.90796	0.68541	0.91716	0.68541	0.92796
0.68924	0.90787	0.68924	0.91707	0.68924	0.92787
0.70167	0.90774	0.70167	0.91694	0.70167	0.92774
0.68474	0.90747	0.68474	0.91667	0.68474	0.92747
0.68395	0.9073	0.68395	0.9165	0.68395	0.9273
0.69153	0.90708	0.69153	0.91628	0.69153	0.92708
0.68707	0.90695	0.68707	0.91615	0.68707	0.92695
0.70494	0.90673	0.70494	0.91593	0.70494	0.92673
0.69185	0.90655	0.69185	0.91575	0.69185	0.92655
0.69515	0.90642	0.69515	0.91562	0.69515	0.92642
0.70928	0.90616	0.70928	0.91536	0.70928	0.92616
0.69757	0.90607	0.69757	0.91527	0.69757	0.92607
0.71933	0.90581	0.71933	0.91501	0.71933	0.92581
0.71662	0.90563	0.71662	0.91483	0.71662	0.92563
0.70499	0.9055	0.70499	0.9147	0.70499	0.9255
0.72064	0.90528	0.72064	0.91448	0.72064	0.92528
0.71273	0.90515	0.71273	0.91435	0.71273	0.92515
0.70378	0.90502	0.70378	0.91422	0.70378	0.92502
0.72014	0.9048	0.72014	0.914	0.72014	0.9248
0.71277	0.90462	0.71277	0.91382	0.71277	0.92462
0.72563	0.90436	0.72563	0.91356	0.72563	0.92436
0.73526	0.90423	0.73526	0.91343	0.73526	0.92423
0.71751	0.90414	0.71751	0.91334	0.71751	0.92414
0.7395	0.90388	0.7395	0.91308	0.7395	0.92388
0.73526	0.90375	0.73526	0.91295	0.73526	0.92375
0.74019	0.90353	0.74019	0.91273	0.74019	0.92353
0.7442	0.90335	0.7442	0.91255	0.7442	0.92335
0.73335	0.90322	0.73335	0.91242	0.73335	0.92322
0.73821	0.90296	0.73821	0.91216	0.73821	0.92296
0.73606	0.90287	0.73606	0.91207	0.73606	0.92287
0.73709	0.90261	0.73709	0.91181	0.73709	0.92261
0.75064	0.90247	0.75064	0.91167	0.75064	0.92247
0.7329	0.90239	0.7329	0.91159	0.7329	0.92239
0.75229	0.90212	0.75229	0.91132	0.75229	0.92212
0.74877	0.90195	0.74877	0.91115	0.74877	0.92195
0.74031	0.90173	0.74031	0.91093	0.74031	0.92173
0.74751	0.9016	0.74751	0.9108	0.74751	0.9216
0.74188	0.90147	0.74188	0.91067	0.74188	0.92147
0.74925	0.90125	0.74925	0.91045	0.74925	0.92125
0.7522	0.90107	0.7522	0.91027	0.7522	0.92107
0.73754	0.90081	0.73754	0.91001	0.73754	0.92081
0.74633	0.90068	0.74633	0.90988	0.74633	0.92068
0.75653	0.90059	0.75653	0.90979	0.75653	0.92059
0.74506	0.90028	0.74506	0.90948	0.74506	0.92028
0.75958	0.90015	0.75958	0.90935	0.75958	0.92015
0.75116	0.89993	0.75116	0.90913	0.75116	0.91993
0.75414	0.8998	0.75414	0.909	0.75414	0.9198
0.7657	0.89962	0.7657	0.90882	0.7657	0.91962
0.75587	0.8994	0.75587	0.9086	0.75587	0.9194
0.76378	0.89927	0.76378	0.90847	0.76378	0.91927
0.76927	0.89901	0.76927	0.90821	0.76927	0.91901
0.75908	0.89888	0.75908	0.90808	0.75908	0.91888
0.77258	0.89875	0.77258	0.90795	0.77258	0.91875
0.76554	0.89848	0.76554	0.90768	0.76554	0.91848
0.76335	0.89835	0.76335	0.90755	0.76335	0.91835
0.7805	0.89813	0.7805	0.90733	0.7805	0.91813
0.77241	0.89796	0.77241	0.90716	0.77241	0.91796
0.78729	0.89774	0.78729	0.90694	0.78729	0.91774
0.78001	0.89761	0.78001	0.90681	0.78001	0.91761
0.77128	0.89747	0.77128	0.90667	0.77128	0.91747
0.79026	0.89721	0.79026	0.90641	0.79026	0.91721
0.77657	0.89708	0.77657	0.90628	0.77657	0.91708
0.77814	0.89695	0.77814	0.90615	0.77814	0.91695
0.79299	0.89668	0.79299	0.90588	0.79299	0.91668
0.78318	0.89655	0.78318	0.90575	0.78318	0.91655
0.79566	0.89633	0.79566	0.90553	0.79566	0.91633
0.79752	0.89616	0.79752	0.90536	0.79752	0.91616
0.79458	0.89603	0.79458	0.90523	0.79458	0.91603
0.79513	0.89576	0.79513	0.90496	0.79513	0.91576
0.80148	0.89568	0.80148	0.90488	0.80148	0.91568
0.79315	0.89537	0.79315	0.90457	0.79315	0.91537
0.8029	0.89524	0.8029	0.90444	0.8029	0.91524
0.81238	0.89511	0.81238	0.90431	0.81238	0.91511
0.8058	0.89489	0.8058	0.90409	0.8058	0.91489
0.81556	0.89475	0.81556	0.90395	0.81556	0.91475
0.81444	0.89462	0.81444	0.90382	0.81444	0.91462
0.81492	0.89436	0.81492	0.90356	0.81492	0.91436
0.82083	0.89423	0.82083	0.90343	0.82083	0.91423
0.80827	0.89396	0.80827	0.90316	0.80827	0.91396
0.82409	0.89388	0.82409	0.90308	0.82409	0.91388
0.81058	0.89361	0.81058	0.90281	0.81058	0.91361
0.81135	0.89348	0.81135	0.90268	0.81135	0.91348
0.82855	0.89335	0.82855	0.90255	0.82855	0.91335
0.81398	0.89309	0.81398	0.90229	0.81398	0.91309
0.82735	0.89296	0.82735	0.90216	0.82735	0.91296
0.81615	0.89274	0.81615	0.90194	0.81615	0.91274
0.82995	0.89261	0.82995	0.90181	0.82995	0.91261
0.83196	0.89247	0.83196	0.90167	0.83196	0.91247
0.82172	0.89221	0.82172	0.90141	0.82172	0.91221
0.84103	0.89208	0.84103	0.90128	0.84103	0.91208
0.83183	0.89182	0.83183	0.90102	0.83183	0.91182
0.82283	0.89168	0.82283	0.90088	0.82283	0.91168
0.83938	0.8916	0.83938	0.9008	0.83938	0.9116
0.82293	0.89133	0.82293	0.90053	0.82293	0.91133
0.83016	0.8912	0.83016	0.9004	0.83016	0.9112
0.83899	0.89094	0.83899	0.90014	0.83899	0.91094
0.83281	0.89081	0.83281	0.90001	0.83281	0.91081
0.84569	0.89068	0.84569	0.89988	0.84569	0.91068
0.83573	0.89046	0.83573	0.89966	0.83573	0.91046
0.83903	0.89032	0.83903	0.89952	0.83903	0.91032
0.85534	0.89002	0.85534	0.89922	0.85534	0.91002
0.84364	0.88989	0.84364	0.89909	0.84364	0.90989
0.84884	0.8898	0.84884	0.899	0.84884	0.9098
0.85324	0.88954	0.85324	0.89874	0.85324	0.90954
0.8409	0.8894	0.8409	0.8986	0.8409	0.9094
0.86178	0.88918	0.86178	0.89838	0.86178	0.90918
0.85471	0.88901	0.85471	0.89821	0.85471	0.90901
0.86787	0.88879	0.86787	0.89799	0.86787	0.90879
0.85774	0.88866	0.85774	0.89786	0.85774	0.90866
0.85564	0.88853	0.85564	0.89773	0.85564	0.90853
0.87113	0.88826	0.87113	0.89746	0.87113	0.90826
0.85911	0.88818	0.85911	0.89738	0.85911	0.90818
0.87236	0.88787	0.87236	0.89707	0.87236	0.90787
0.88418	0.88774	0.88418	0.89694	0.88418	0.90774
0.87782	0.88761	0.87782	0.89681	0.87782	0.90761
0.88812	0.88739	0.88812	0.89659	0.88812	0.90739
0.88574	0.88725	0.88574	0.89645	0.88574	0.90725
0.8759	0.88712	0.8759	0.89632	0.8759	0.90712
0.89146	0.8869	0.89146	0.8961	0.89146	0.9069
0.87983	0.88677	0.87983	0.89597	0.87983	0.90677
0.89427	0.88651	0.89427	0.89571	0.89427	0.90651
0.87778	0.88642	0.87778	0.89562	0.87778	0.90642
0.88476	0.88629	0.88476	0.89549	0.88476	0.90629
0.89491	0.88603	0.89491	0.89523	0.89491	0.90603
0.88467	0.88589	0.88467	0.89509	0.88467	0.90589
0.90622	0.88568	0.90622	0.89488	0.90622	0.90568
0.88991	0.88554	0.88991	0.89474	0.88991	0.90554
0.91082	0.88532	0.91082	0.89452	0.91082	0.90533
0.89432	0.88519	0.89432	0.89439	0.89432	0.90519
0.89482	0.88506	0.89482	0.89426	0.89482	0.90506
0.90927	0.8848	0.90927	0.894	0.90927	0.9048
0.90229	0.88471	0.90229	0.89391	0.90229	0.90471
0.91364	0.88445	0.91364	0.89365	0.91364	0.90445
0.8979	0.88432	0.8979	0.89352	0.8979	0.90432
0.91711	0.88423	0.91711	0.89343	0.91711	0.90423
0.90479	0.88397	0.90479	0.89317	0.90479	0.90397
0.90623	0.88383	0.90623	0.89303	0.90623	0.90383
0.91046	0.88361	0.91046	0.89281	0.91046	0.90361
0.91336	0.88348	0.91336	0.89268	0.91336	0.90348
0.90876	0.88326	0.90876	0.89246	0.90876	0.90326
0.91086	0.88313	0.91086	0.89233	0.91086	0.90313
0.92875	0.883	0.92875	0.8922	0.92875	0.903
0.91681	0.88278	0.91681	0.89198	0.91681	0.90278
0.93321	0.88265	0.93321	0.89185	0.93321	0.90265
0.93285	0.88247	0.93285	0.89167	0.93285	0.90247
0.92085	0.88225	0.92085	0.89145	0.92085	0.90225
0.93598	0.88212	0.93598	0.89132	0.93598	0.90212
0.92073	0.8819	0.92073	0.8911	0.92073	0.9019
0.93751	0.88173	0.93751	0.89093	0.93751	0.90173
0.92674	0.88151	0.92674	0.89071	0.92674	0.90151
0.94024	0.88138	0.94024	0.89058	0.94024	0.90138
0.9398	0.88125	0.9398	0.89045	0.9398	0.90125
0.94068	0.88103	0.94068	0.89023	0.94068	0.90103
0.94924	0.8809	0.94924	0.8901	0.94924	0.9009
0.93782	0.88076	0.93782	0.88996	0.93782	0.90076
0.95289	0.88054	0.95289	0.88974	0.95289	0.90054
0.94798	0.88041	0.94798	0.88961	0.94798	0.90041
0.95152	0.88015	0.95152	0.88935	0.95152	0.90015
0.94807	0.88006	0.94807	0.88926	0.94807	0.90006
0.95811	0.8798	0.95811	0.889	0.95811	0.8998
0.96484	0.87967	0.96484	0.88887	0.96484	0.89967
0.95745	0.87954	0.95745	0.88874	0.95745	0.89954
0.96911	0.87932	0.96911	0.88852	0.96911	0.89932
0.95261	0.87923	0.95261	0.88843	0.95261	0.89923
0.97356	0.87901	0.97356	0.88821	0.97356	0.89901
0.95583	0.87888	0.95583	0.88808	0.95583	0.89888
0.95982	0.87875	0.95982	0.88795	0.95982	0.89875
0.95883	0.87853	0.95883	0.88773	0.95883	0.89853
0.95973	0.8784	0.95973	0.8876	0.95973	0.8984
0.9744	0.87813	0.9744	0.88733	0.9744	0.89813
0.9683	0.87804	0.9683	0.88724	0.9683	0.89804
0.97735	0.87778	0.97735	0.88698	0.97735	0.89778
0.97006	0.87765	0.97006	0.88685	0.97006	0.89765
0.98302	0.87752	0.98302	0.88672	0.98302	0.89752
0.97302	0.87734	0.97302	0.88654	0.97302	0.89734
0.99026	0.87721	0.99026	0.88641	0.99026	0.89721
0.9814	0.87699	0.9814	0.88619	0.9814	0.89699
0.99437	0.87686	0.99437	0.88606	0.99437	0.89686
0.9866	0.87673	0.9866	0.88593	0.9866	0.89673
0.99723	0.87646	0.99723	0.88566	0.99723	0.89646
0.98299	0.87642	0.98299	0.88562	0.98299	0.89642
1.00322	0.87616	1.00322	0.88536	1.00322	0.89616
0.99777	0.87603	0.99777	0.88523	0.99777	0.89603
1.00488	0.87581	1.00488	0.88501	1.00488	0.89581
0.99416	0.87568	0.99416	0.88488	0.99416	0.89568
0.98999	0.87554	0.98999	0.88474	0.98999	0.89554
1.00739	0.87528	1.00739	0.88448	1.00739	0.89528
0.98991	0.87524	0.98991	0.88444	0.98991	0.89524
1.00546	0.87497	1.00546	0.88417	1.00546	0.89497
0.98882	0.87484	0.98882	0.88404	0.98882	0.89484
1.00627	0.87462	1.00627	0.88382	1.00627	0.89462
0.99255	0.87449	0.99255	0.88369	0.99255	0.89449
0.99222	0.87436	0.99222	0.88356	0.99222	0.89436
0.99086	0.87414	0.99086	0.88334	0.99086	0.89414
0.99389	0.87401	0.99389	0.88321	0.99389	0.89401
1.01042	0.87388	1.01042	0.88308	1.01042	0.89388
0.9938	0.87361	0.9938	0.88281	0.9938	0.89361
1.00876	0.87348	1.00876	0.88268	1.00876	0.89348
1.00429	0.87322	1.00429	0.88242	1.00429	0.89322
1.00735	0.87313	1.00735	0.88233	1.00735	0.89313
1.00569	0.87287	1.00569	0.88207	1.00569	0.89287
1.00064	0.87274	1.00064	0.88194	1.00064	0.89274
1.02059	0.87265	1.02059	0.88185	1.02059	0.89265
1.00981	0.87239	1.00981	0.88159	1.00981	0.89239
1.01038	0.87225	1.01038	0.88145	1.01038	0.89225
1.01155	0.87204	1.01155	0.88124	1.01155	0.89204
1.011	0.8719	1.011	0.8811	1.011	0.8919
1.02689	0.87173	1.02689	0.88093	1.02689	0.89173
1.02248	0.87147	1.02248	0.88067	1.02248	0.89147
1.02917	0.87138	1.02917	0.88058	1.02917	0.89138
1.0246	0.87111	1.0246	0.88031	1.0246	0.89111
1.02102	0.87098	1.02102	0.88018	1.02102	0.89098
1.0348	0.87085	1.0348	0.88005	1.0348	0.89085
1.02553	0.87063	1.02553	0.87983	1.02553	0.89063
1.03565	0.8705	1.03565	0.8797	1.03565	0.8905
1.04663	0.87037	1.04663	0.87957	1.04663	0.89037
1.03943	0.87015	1.03943	0.87935	1.03943	0.89015
1.05302	0.87002	1.05302	0.87922	1.05302	0.89002
1.03628	0.86975	1.03628	0.87895	1.03628	0.88975
1.0519	0.86967	1.0519	0.87887	1.0519	0.88967
1.03732	0.8694	1.03732	0.8786	1.03732	0.8894
1.0451	0.86927	1.0451	0.87847	1.0451	0.88927
1.05904	0.86914	1.05904	0.87834	1.05904	0.88914
1.05037	0.86892	1.05037	0.87812	1.05037	0.88892
1.06254	0.86879	1.06254	0.87799	1.06254	0.88879
1.05376	0.86857	1.05376	0.87777	1.05376	0.88857
1.06727	0.86844	1.06727	0.87764	1.06727	0.88844
1.06332	0.86831	1.06332	0.87751	1.06332	0.88831
1.07079	0.86809	1.07079	0.87729	1.07079	0.88809
1.06818	0.86796	1.06818	0.87716	1.06818	0.88796
1.06333	0.86769	1.06333	0.87689	1.06333	0.88769
1.0631	0.86761	1.0631	0.87681	1.0631	0.88761
1.05894	0.86752	1.05894	0.87672	1.05894	0.88752
1.07194	0.86721	1.07194	0.87641	1.07194	0.88721
1.06456	0.86708	1.06456	0.87628	1.06456	0.88708
1.07862	0.86686	1.07862	0.87606	1.07862	0.88686
1.08266	0.86673	1.08266	0.87593	1.08266	0.88673
1.08704	0.86651	1.08704	0.87571	1.08704	0.88651
1.08321	0.86638	1.08321	0.87558	1.08321	0.88638
1.07086	0.86625	1.07086	0.87545	1.07086	0.88625
1.08526	0.86603	1.08526	0.87523	1.08526	0.88603
1.0712	0.8659	1.0712	0.8751	1.0712	0.8859
1.09165	0.86563	1.09165	0.87483	1.09165	0.88563
1.07586	0.86554	1.07586	0.87474	1.07586	0.88554
1.07931	0.86541	1.07931	0.87461	1.07931	0.88541
1.09267	0.86515	1.09267	0.87435	1.09267	0.88515
1.08399	0.86502	1.08399	0.87422	1.08399	0.88502
1.09481	0.8648	1.09481	0.874	1.09481	0.8848
1.08437	0.86467	1.08437	0.87387	1.08437	0.88467
1.10546	0.86445	1.10546	0.87365	1.10546	0.88445
1.08766	0.86432	1.08766	0.87352	1.08766	0.88432
1.08997	0.86418	1.08997	0.87338	1.08997	0.88418
1.10624	0.86392	1.10624	0.87312	1.10624	0.88392
1.09357	0.86383	1.09357	0.87303	1.09357	0.88383
1.10661	0.8637	1.10661	0.8729	1.10661	0.8837
1.09118	0.86344	1.09118	0.87264	1.09118	0.88344
1.11007	0.86335	1.11007	0.87255	1.11007	0.88335
1.09775	0.86309	1.09775	0.87229	1.09775	0.88309
1.10077	0.86296	1.10077	0.87216	1.10077	0.88296
1.0998	0.86274	1.0998	0.87194	1.0998	0.88274
1.10387	0.86261	1.10387	0.87181	1.10387	0.88261
1.12039	0.86247	1.12039	0.87167	1.12039	0.88247
1.1124	0.86225	1.1124	0.87145	1.1124	0.88225
1.13008	0.86212	1.13008	0.87132	1.13008	0.88212
1.11205	0.86186	1.11205	0.87106	1.11205	0.88186
1.13149	0.86177	1.13149	0.87097	1.13149	0.88177
1.12726	0.86164	1.12726	0.87084	1.12726	0.88164
1.12938	0.86138	1.12938	0.87058	1.12938	0.88138
1.12668	0.86129	1.12668	0.87049	1.12668	0.88129
1.13243	0.86103	1.13243	0.87023	1.13243	0.88103
1.13828	0.86089	1.13828	0.87009	1.13828	0.88089
1.1402	0.86068	1.1402	0.86988	1.1402	0.88068
1.14309	0.86059	1.14309	0.86979	1.14309	0.88059
1.12548	0.86046	1.12548	0.86966	1.12548	0.88046
1.14687	0.86024	1.14687	0.86944	1.14687	0.88024
1.13164	0.86011	1.13164	0.86931	1.13164	0.88011
1.13504	0.85997	1.13504	0.86917	1.13504	0.87997
1.13146	0.85975	1.13146	0.86895	1.13146	0.87975
1.14397	0.85962	1.14397	0.86882	1.14397	0.87962
1.14487	0.85936	1.14487	0.86856	1.14487	0.87936
1.143	0.85923	1.143	0.86843	1.143	0.87923
1.1476	0.85901	1.1476	0.86821	1.1476	0.87901
1.14662	0.85892	1.14662	0.86812	1.14662	0.87892
1.16244	0.85879	1.16244	0.86799	1.16244	0.87879
1.14972	0.85857	1.14972	0.86777	1.14972	0.87857
1.1676	0.85844	1.1676	0.86764	1.1676	0.87844
1.15927	0.85822	1.15927	0.86742	1.15927	0.87822
1.16858	0.85809	1.16858	0.86729	1.16858	0.87809
1.15549	0.85796	1.15549	0.86716	1.15549	0.87796
1.17519	0.85774	1.17519	0.86694	1.17519	0.87774
1.16168	0.85765	1.16168	0.86685	1.16168	0.87765
1.18548	0.85739	1.18548	0.86659	1.18548	0.87739
1.16729	0.85725	1.16729	0.86645	1.16729	0.87725
1.18092	0.85708	1.18092	0.86628	1.18092	0.87708
1.17315	0.85695	1.17315	0.86615	1.17315	0.87695
1.18598	0.85682	1.18598	0.86602	1.18598	0.87682
1.17912	0.85664	1.17912	0.86584	1.17912	0.87664
1.19314	0.85651	1.19314	0.86571	1.19314	0.87651
1.18374	0.85625	1.18374	0.86545	1.18374	0.87625
1.19891	0.8562	1.19891	0.8654	1.19891	0.8762
1.19805	0.85594	1.19805	0.86514	1.19805	0.87594
1.19976	0.85585	1.19976	0.86505	1.19976	0.87585
1.20418	0.85563	1.20418	0.86483	1.20418	0.87563
1.18567	0.85554	1.18567	0.86474	1.18567	0.87554
1.20637	0.85528	1.20637	0.86448	1.20637	0.87528
1.18679	0.85519	1.18679	0.86439	1.18679	0.87519
1.20642	0.85506	1.20642	0.86426	1.20642	0.87506
1.19628	0.85484	1.19628	0.86404	1.19628	0.87484
1.21391	0.85475	1.21391	0.86395	1.21391	0.87475
1.20103	0.85454	1.20103	0.86374	1.20103	0.87454
1.21519	0.8544	1.21519	0.8636	1.21519	0.8744
1.21785	0.85423	1.21785	0.86343	1.21785	0.87423
1.21599	0.8541	1.21599	0.8633	1.21599	0.8741
1.20366	0.85397	1.20366	0.86317	1.20366	0.87397
1.20651	0.85375	1.20651	0.86295	1.20651	0.87375
1.20842	0.85366	1.20842	0.86286	1.20842	0.87366
1.21597	0.85339	1.21597	0.86259	1.21597	0.87339
1.20706	0.85331	1.20706	0.86251	1.20706	0.87331
1.20687	0.85309	1.20687	0.86229	1.20687	0.87309
1.22694	0.853	1.22694	0.8622	1.22694	0.873
1.21626	0.85278	1.21626	0.86198	1.21626	0.87278
1.23218	0.85265	1.23218	0.86185	1.23218	0.87265
1.21647	0.85239	1.21647	0.86159	1.21647	0.87239
1.23584	0.85234	1.23584	0.86154	1.23584	0.87234
1.22857	0.85208	1.22857	0.86128	1.22857	0.87208
1.24038	0.85195	1.24038	0.86115	1.24038	0.87195
1.2238	0.85186	1.2238	0.86106	1.2238	0.87186
1.23463	0.85164	1.23463	0.86084	1.23463	0.87164
1.22604	0.85155	1.22604	0.86075	1.22604	0.87155
1.23288	0.85133	1.23288	0.86053	1.23288	0.87133
1.24469	0.8512	1.24469	0.8604	1.24469	0.8712
1.23885	0.85098	1.23885	0.86018	1.23885	0.87098
1.25196	0.85085	1.25196	0.86005	1.25196	0.87085
1.23831	0.85081	1.23831	0.86001	1.23831	0.87081
1.25808	0.85054	1.25808	0.85974	1.25808	0.87054
1.24779	0.85046	1.24779	0.85966	1.24779	0.87046
1.25648	0.85024	1.25648	0.85944	1.25648	0.87024
1.24933	0.85015	1.24933	0.85935	1.24933	0.87015
1.25092	0.84993	1.25092	0.85913	1.25092	0.86993
1.262	0.8498	1.262	0.859	1.262	0.8698
1.25942	0.84962	1.25942	0.85882	1.25942	0.86962
1.27034	0.84954	1.27034	0.85874	1.27034	0.86954
1.26947	0.84927	1.26947	0.85847	1.26947	0.86927
1.27562	0.84918	1.27562	0.85838	1.27562	0.86918
1.26442	0.8491	1.26442	0.8583	1.26442	0.8691
1.26501	0.84888	1.26501	0.85808	1.26501	0.86888
1.2745	0.84875	1.2745	0.85795	1.2745	0.86875
1.26844	0.84857	1.26844	0.85777	1.26844	0.86857
1.28428	0.84844	1.28428	0.85764	1.28428	0.86844
1.26798	0.84822	1.26798	0.85742	1.26798	0.86822
1.27829	0.84813	1.27829	0.85733	1.27829	0.86813
1.27155	0.84804	1.27155	0.85724	1.27155	0.86804
1.28279	0.84778	1.28279	0.85698	1.28279	0.86778
1.29258	0.84774	1.29258	0.85694	1.29258	0.86774
1.27363	0.84747	1.27363	0.85667	1.27363	0.86747
1.29466	0.84739	1.29466	0.85659	1.29466	0.86739
1.28429	0.84717	1.28429	0.85637	1.28429	0.86717
1.29771	0.84704	1.29771	0.85624	1.29771	0.86704
1.27884	0.84695	1.27884	0.85615	1.27884	0.86695
1.2898	0.84673	1.2898	0.85593	1.2898	0.86673
1.28472	0.84664	1.28472	0.85584	1.28472	0.86664
1.30117	0.84638	1.30117	0.85558	1.30117	0.86638
1.29604	0.84629	1.29604	0.85549	1.29604	0.86629
1.30634	0.8462	1.30634	0.8554	1.30634	0.8662
1.29686	0.84594	1.29686	0.85514	1.29686	0.86594
1.29711	0.84585	1.29711	0.85505	1.29711	0.86585
1.31384	0.84563	1.31384	0.85483	1.31384	0.86563
1.31142	0.8455	1.31142	0.8547	1.31142	0.8655
1.32425	0.84532	1.32425	0.85452	1.32425	0.86532
1.30473	0.84519	1.30473	0.85439	1.30473	0.86519
1.3266	0.84511	1.3266	0.85431	1.3266	0.86511
1.31578	0.84489	1.31578	0.85409	1.31578	0.86489
1.32874	0.8448	1.32874	0.854	1.32874	0.8648
1.32604	0.84454	1.32604	0.85374	1.32604	0.86454
1.33896	0.84445	1.33896	0.85365	1.33896	0.86445
1.324	0.84436	1.324	0.85356	1.324	0.86436
1.32619	0.84414	1.32619	0.85334	1.32619	0.86414
1.32871	0.84401	1.32871	0.85321	1.32871	0.86401
1.32666	0.84383	1.32666	0.85303	1.32666	0.86383
1.34334	0.8437	1.34334	0.8529	1.34334	0.8637
1.32981	0.84361	1.32981	0.85281	1.32981	0.86361
1.3346	0.84344	1.3346	0.85264	1.3346	0.86344
1.33444	0.84331	1.33444	0.85251	1.33444	0.86331
1.33229	0.84313	1.33229	0.85233	1.33229	0.86313
1.35133	0.843	1.35133	0.8522	1.35133	0.863
1.33428	0.84291	1.33428	0.85211	1.33428	0.86291
1.35224	0.84269	1.35224	0.85189	1.35224	0.86269
1.33646	0.84261	1.33646	0.85181	1.33646	0.86261
1.33767	0.84239	1.33767	0.85159	1.33767	0.86239
1.34329	0.84225	1.34329	0.85145	1.34329	0.86225
1.34623	0.84208	1.34623	0.85128	1.34623	0.86208
1.36349	0.84195	1.36349	0.85115	1.36349	0.86195
1.3464	0.84186	1.3464	0.85106	1.3464	0.86186
1.36001	0.84164	1.36001	0.85084	1.36001	0.86164
1.35436	0.84155	1.35436	0.85075	1.35436	0.86155
1.37272	0.84142	1.37272	0.85062	1.37272	0.86142
1.37334	0.84125	1.37334	0.85045	1.37334	0.86125
1.3589	0.84111	1.3589	0.85031	1.3589	0.86111
1.37717	0.8409	1.37717	0.8501	1.37717	0.8609
1.35878	0.84085	1.35878	0.85005	1.35878	0.86085
1.37035	0.84059	1.37035	0.84979	1.37035	0.86059
1.3683	0.8405	1.3683	0.8497	1.3683	0.8605
1.38381	0.84037	1.38381	0.84957	1.38381	0.86037
1.38567	0.84019	1.38567	0.84939	1.38567	0.86019
1.36967	0.84011	1.36967	0.84931	1.36967	0.86011
1.37822	0.83989	1.37822	0.84909	1.37822	0.85989
1.37815	0.8398	1.37815	0.849	1.37815	0.8598
1.39407	0.83967	1.39407	0.84887	1.39407	0.85967
1.39879	0.83949	1.39879	0.84869	1.39879	0.85949
1.38236	0.8394	1.38236	0.8486	1.38236	0.8594
1.40247	0.83918	1.40247	0.84838	1.40247	0.85918
1.3862	0.83905	1.3862	0.84825	1.3862	0.85905
1.40492	0.83901	1.40492	0.84821	1.40492	0.85901
1.40943	0.83879	1.40943	0.84799	1.40943	0.85879
1.40661	0.83866	1.40661	0.84786	1.40661	0.85866
1.41242	0.83848	1.41242	0.84768	1.41242	0.85848
1.40156	0.8384	1.40156	0.8476	1.40156	0.8584
1.40216	0.83822	1.40216	0.84742	1.40216	0.85822
1.42162	0.83809	1.42162	0.84729	1.42162	0.85809
1.40552	0.838	1.40552	0.8472	1.40552	0.858
1.40639	0.83782	1.40639	0.84702	1.40639	0.85782
1.42096	0.83769	1.42096	0.84689	1.42096	0.85769
1.41885	0.83752	1.41885	0.84672	1.41885	0.85752
1.43821	0.83739	1.43821	0.84659	1.43821	0.85739
1.41798	0.83734	1.41798	0.84654	1.41798	0.85734
1.41939	0.83712	1.41939	0.84632	1.41939	0.85712
1.43647	0.83704	1.43647	0.84624	1.43647	0.85704
1.43485	0.83686	1.43485	0.84606	1.43485	0.85686
1.43321	0.83673	1.43321	0.84593	1.43321	0.85673
1.43509	0.83655	1.43509	0.84575	1.43509	0.85655
1.43076	0.83646	1.43076	0.84566	1.43076	0.85646
1.44975	0.83638	1.44975	0.84558	1.44975	0.85638
1.45163	0.83616	1.45163	0.84536	1.45163	0.85616
1.43432	0.83611	1.43432	0.84531	1.43432	0.85611
1.45128	0.83598	1.45128	0.84518	1.45128	0.85598
1.44487	0.83576	1.44487	0.84496	1.44487	0.85576
1.43472	0.83572	1.43472	0.84492	1.43472	0.85572
1.45837	0.8355	1.45837	0.8447	1.45837	0.8555
1.44476	0.83541	1.44476	0.84461	1.44476	0.85541
1.44727	0.83524	1.44727	0.84444	1.44727	0.85524
1.46625	0.83515	1.46625	0.84435	1.46625	0.85515
1.45142	0.83502	1.45142	0.84422	1.45142	0.85502
1.45148	0.83489	1.45148	0.84409	1.45148	0.85489
1.46573	0.83475	1.46573	0.84395	1.46573	0.85475
1.44844	0.83467	1.44844	0.84387	1.44844	0.85467
1.46714	0.83445	1.46714	0.84365	1.46714	0.85445
1.47258	0.8344	1.47258	0.8436	1.47258	0.8544
1.45795	0.83418	1.45795	0.84338	1.45795	0.85418
1.47456	0.8341	1.47456	0.8433	1.47456	0.8541
1.47803	0.83392	1.47803	0.84312	1.47803	0.85392
1.46158	0.83383	1.46158	0.84303	1.46158	0.85383
1.47854	0.8337	1.47854	0.8429	1.47854	0.8537
1.48419	0.83353	1.48419	0.84273	1.48419	0.85353
1.4655	0.83344	1.4655	0.84264	1.4655	0.85344
1.48065	0.83322	1.48065	0.84242	1.48065	0.85322
1.48578	0.83318	1.48578	0.84238	1.48578	0.85318
1.47302	0.83309	1.47302	0.84229	1.47302	0.85309
1.49115	0.83287	1.49115	0.84207	1.49115	0.85287
1.47725	0.83278	1.47725	0.84198	1.47725	0.85278
1.47794	0.83261	1.47794	0.84181	1.47794	0.85261
1.49821	0.83247	1.49821	0.84167	1.49821	0.85247
1.47623	0.83239	1.47623	0.84159	1.47623	0.85239
1.47869	0.83221	1.47869	0.84141	1.47869	0.85221
1.49986	0.83212	1.49986	0.84132	1.49986	0.85212
1.49888	0.83195	1.49888	0.84115	1.49888	0.85195
1.4854	0.83186	1.4854	0.84106	1.4854	0.85186
1.49374	0.83173	1.49374	0.84093	1.49374	0.85173
1.49849	0.83155	1.49849	0.84075	1.49849	0.85155
1.50393	0.83146	1.50393	0.84066	1.50393	0.85146
1.50993	0.83129	1.50993	0.84049	1.50993	0.85129
1.48927	0.83116	1.48927	0.84036	1.48927	0.85116
1.49394	0.83098	1.49394	0.84018	1.49394	0.85098
1.51219	0.83089	1.51219	0.84009	1.51219	0.85089
1.49645	0.83081	1.49645	0.84001	1.49645	0.85081
1.49565	0.83063	1.49565	0.83983	1.49565	0.85063
1.51294	0.83054	1.51294	0.83974	1.51294	0.85054
1.51425	0.83041	1.51425	0.83961	1.51425	0.85041
1.5188	0.83024	1.5188	0.83944	1.5188	0.85024
1.50272	0.83015	1.50272	0.83935	1.50272	0.85015
1.50781	0.82993	1.50781	0.83913	1.50781	0.84993
1.52379	0.82989	1.52379	0.83909	1.52379	0.84989
1.52546	0.82967	1.52546	0.83887	1.52546	0.84967
1.51051	0.82958	1.51051	0.83878	1.51051	0.84958
1.51452	0.82945	1.51452	0.83865	1.51452	0.84945
1.52417	0.82927	1.52417	0.83847	1.52417	0.84927
1.53373	0.82918	1.53373	0.83838	1.53373	0.84918
1.53248	0.82901	1.53248	0.83821	1.53248	0.84901
1.51568	0.82892	1.51568	0.83812	1.51568	0.84892
1.53292	0.82879	1.53292	0.83799	1.53292	0.84879
1.54015	0.82861	1.54015	0.83781	1.54015	0.84861
1.519	0.82853	1.519	0.83773	1.519	0.84853
1.53014	0.82831	1.53014	0.83751	1.53014	0.84831
1.52858	0.82822	1.52858	0.83742	1.52858	0.84822
1.52497	0.82818	1.52497	0.83738	1.52497	0.84818
1.54695	0.82796	1.54695	0.83716	1.54695	0.84796
1.527	0.82787	1.527	0.83707	1.527	0.84787
1.52912	0.82769	1.52912	0.83689	1.52912	0.84769
1.55069	0.82756	1.55069	0.83676	1.55069	0.84756
1.53504	0.82747	1.53504	0.83667	1.53504	0.84747
1.53391	0.8273	1.53391	0.8365	1.53391	0.8473
1.55475	0.82721	1.55475	0.83641	1.55475	0.84721
1.54099	0.82699	1.54099	0.83619	1.54099	0.84699
1.5478	0.8269	1.5478	0.8361	1.5478	0.8469
1.55526	0.82673	1.55526	0.83593	1.55526	0.84673
1.54229	0.8266	1.54229	0.8358	1.54229	0.8466
1.56397	0.82655	1.56397	0.83575	1.56397	0.84655
1.56559	0.82633	1.56559	0.83553	1.56559	0.84633
1.55082	0.82625	1.55082	0.83545	1.55082	0.84625
1.55277	0.82607	1.55277	0.83527	1.55277	0.84607
1.56002	0.82594	1.56002	0.83514	1.56002	0.84594
1.57319	0.82585	1.57319	0.83505	1.57319	0.84585
1.57332	0.82563	1.57332	0.83483	1.57332	0.84563
1.55921	0.82559	1.55921	0.83479	1.55921	0.84559
1.57593	0.82546	1.57593	0.83466	1.57593	0.84546
1.57789	0.82528	1.57789	0.83448	1.57789	0.84528
1.5675	0.82515	1.5675	0.83435	1.5675	0.84515
1.56188	0.82502	1.56188	0.83422	1.56188	0.84502
1.56867	0.82489	1.56867	0.83409	1.56867	0.84489
1.58374	0.8248	1.58374	0.834	1.58374	0.8448
1.58301	0.82462	1.58301	0.83382	1.58301	0.84462
1.57102	0.82454	1.57102	0.83374	1.57102	0.84454
1.57721	0.82432	1.57721	0.83352	1.57721	0.84432
1.59419	0.82423	1.59419	0.83343	1.59419	0.84423
1.57642	0.82414	1.57642	0.83334	1.57642	0.84414
1.5873	0.82392	1.5873	0.83312	1.5873	0.84392
1.60065	0.82388	1.60065	0.83308	1.60065	0.84388
1.58592	0.82366	1.58592	0.83286	1.58592	0.84366
1.59738	0.82357	1.59738	0.83277	1.59738	0.84357
1.60455	0.82339	1.60455	0.83259	1.60455	0.84339
1.5889	0.82331	1.5889	0.83251	1.5889	0.84331
1.60119	0.82318	1.60119	0.83238	1.60119	0.84318
1.60706	0.82304	1.60706	0.83224	1.60706	0.84304
1.59126	0.82291	1.59126	0.83211	1.59126	0.84291
1.59517	0.82274	1.59517	0.83194	1.59517	0.84274
1.61248	0.82265	1.61248	0.83185	1.61248	0.84265
1.59794	0.82256	1.59794	0.83176	1.59794	0.84256
1.61421	0.82234	1.61421	0.83154	1.61421	0.84234
1.60032	0.82225	1.60032	0.83145	1.60032	0.84225
1.6047	0.82208	1.6047	0.83128	1.6047	0.84208
1.62237	0.82199	1.62237	0.83119	1.62237	0.84199
1.62754	0.82182	1.62754	0.83102	1.62754	0.84182
1.61179	0.82173	1.61179	0.83093	1.61179	0.84173
1.63085	0.8216	1.63085	0.8308	1.63085	0.8416
1.63287	0.82142	1.63287	0.83062	1.63287	0.84142
1.61886	0.82133	1.61886	0.83053	1.61886	0.84133
1.64067	0.82125	1.64067	0.83045	1.64067	0.84125
1.63559	0.82107	1.63559	0.83027	1.63559	0.84107
1.62621	0.82098	1.62621	0.83018	1.62621	0.84098
1.63135	0.82081	1.63135	0.83001	1.63135	0.84081
1.63388	0.82068	1.63388	0.82988	1.63388	0.84068
1.64545	0.82054	1.64545	0.82974	1.64545	0.84054
1.64249	0.82041	1.64249	0.82961	1.64249	0.84041
1.63385	0.82032	1.63385	0.82952	1.63385	0.84032
1.64378	0.82015	1.64378	0.82935	1.64378	0.84015
1.64169	0.81997	1.64169	0.82917	1.64169	0.83997
1.64473	0.81962	1.64473	0.82882	1.64473	0.83962
1.64897	0.81927	1.64897	0.82847	1.64897	0.83927
1.65238	0.8191	1.65238	0.8283	1.65238	0.8391
1.65379	0.81892	1.65379	0.82812	1.65379	0.83892
1.67276	0.81883	1.67276	0.82803	1.67276	0.83883
1.67054	0.81866	1.67054	0.82786	1.67054	0.83866
1.65678	0.81857	1.65678	0.82777	1.65678	0.83857
1.67723	0.81848	1.67723	0.82768	1.67723	0.83848
1.68601	0.81826	1.68601	0.82746	1.68601	0.83826
1.66834	0.81822	1.66834	0.82742	1.66834	0.83822
1.67123	0.81804	1.67123	0.82724	1.67123	0.83804
1.69021	0.81791	1.69021	0.82711	1.69021	0.83791
1.67529	0.81787	1.67529	0.82707	1.67529	0.83787
1.67555	0.81769	1.67555	0.82689	1.67555	0.83769
1.68903	0.81761	1.68903	0.82681	1.68903	0.83761
1.69177	0.81743	1.69177	0.82663	1.69177	0.83743
1.67928	0.81734	1.67928	0.82654	1.67928	0.83734
1.69538	0.81725	1.69538	0.82645	1.69538	0.83725
1.69613	0.81708	1.69613	0.82628	1.69613	0.83708
1.68433	0.81699	1.68433	0.82619	1.68433	0.83699
1.68706	0.81682	1.68706	0.82602	1.68706	0.83682
1.69688	0.81673	1.69688	0.82593	1.69688	0.83673
1.69896	0.81655	1.69896	0.82575	1.69896	0.83655
1.70533	0.8162	1.70533	0.8254	1.70533	0.8362
1.70852	0.81585	1.70852	0.82505	1.70852	0.83585
1.71516	0.8155	1.71516	0.8247	1.71516	0.8355
1.71802	0.81532	1.71802	0.82452	1.71802	0.83532
1.70576	0.81519	1.70576	0.82439	1.70576	0.83519
1.72342	0.81515	1.72342	0.82435	1.72342	0.83515
1.72642	0.81497	1.72642	0.82417	1.72642	0.83497
1.71078	0.81489	1.71078	0.82409	1.71078	0.83489
1.71437	0.81471	1.71437	0.82391	1.71437	0.83471
1.73374	0.81462	1.73374	0.82382	1.73374	0.83462
1.72285	0.81454	1.72285	0.82374	1.72285	0.83454
1.72589	0.81436	1.72589	0.82356	1.72589	0.83436
1.73995	0.81427	1.73995	0.82347	1.73995	0.83427
1.7404	0.8141	1.7404	0.8233	1.7404	0.8341
1.73596	0.81405	1.73596	0.82325	1.73596	0.83405
1.73602	0.81392	1.73602	0.82312	1.73602	0.83392
1.74151	0.81375	1.74151	0.82295	1.74151	0.83375
1.73153	0.81366	1.73153	0.82286	1.73153	0.83366
1.74443	0.81353	1.74443	0.82273	1.74443	0.83353
1.73939	0.81344	1.73939	0.82264	1.73939	0.83344
1.73879	0.81326	1.73879	0.82246	1.73879	0.83326
1.75874	0.81318	1.75874	0.82238	1.75874	0.83318
1.74091	0.81309	1.74091	0.82229	1.74091	0.83309
1.74548	0.81291	1.74548	0.82211	1.74548	0.83291
1.76039	0.81282	1.76039	0.82202	1.76039	0.83282
1.74133	0.81274	1.74133	0.82194	1.74133	0.83274
1.74315	0.81256	1.74315	0.82176	1.74315	0.83256
1.7578	0.81252	1.7578	0.82172	1.7578	0.83252
1.76257	0.8123	1.76257	0.8215	1.76257	0.8323
1.74519	0.81221	1.74519	0.82141	1.74519	0.83221
1.74901	0.81208	1.74901	0.82128	1.74901	0.83208
1.77092	0.81199	1.77092	0.82119	1.77092	0.83199
1.75202	0.81186	1.75202	0.82106	1.75202	0.83186
1.75957	0.81173	1.75957	0.82093	1.75957	0.83173
1.77347	0.81164	1.77347	0.82084	1.77347	0.83164
1.7599	0.81155	1.7599	0.82075	1.7599	0.83155
1.76317	0.81138	1.76317	0.82058	1.76317	0.83138
1.77901	0.81129	1.77901	0.82049	1.77901	0.83129
1.78134	0.81111	1.78134	0.82031	1.78134	0.83111
1.7702	0.81103	1.7702	0.82023	1.7702	0.83103
1.7739	0.81085	1.7739	0.82005	1.7739	0.83085
1.78228	0.81076	1.78228	0.81996	1.78228	0.83076
1.77431	0.81068	1.77431	0.81988	1.77431	0.83068
1.78563	0.81054	1.78563	0.81974	1.78563	0.83054
1.7751	0.81046	1.7751	0.81966	1.7751	0.83046
1.78037	0.81032	1.78037	0.81952	1.78037	0.83032
1.77833	0.81015	1.77833	0.81935	1.77833	0.83015
1.77626	0.81011	1.77626	0.81931	1.77626	0.83011
1.78438	0.80993	1.78438	0.81913	1.78438	0.82993
1.79337	0.80984	1.79337	0.81904	1.79337	0.82984
1.80096	0.80967	1.80096	0.81887	1.80096	0.82967
1.78498	0.80958	1.78498	0.81878	1.78498	0.82958
1.80277	0.80949	1.80277	0.81869	1.80277	0.82949
1.80454	0.80932	1.80454	0.81852	1.80454	0.82932
1.78865	0.80923	1.78865	0.81843	1.78865	0.82923
1.78784	0.80905	1.78784	0.81825	1.78784	0.82905
1.80906	0.80901	1.80906	0.81821	1.80906	0.82901
1.7925	0.80892	1.7925	0.81812	1.7925	0.82892
1.79924	0.8087	1.79924	0.8179	1.79924	0.8287
1.81791	0.80861	1.81791	0.81781	1.81791	0.82861
1.82111	0.80848	1.82111	0.81768	1.82111	0.82848
1.80431	0.8084	1.80431	0.8176	1.80431	0.8284
1.82101	0.80831	1.82101	0.81751	1.82101	0.82831
1.82258	0.80813	1.82258	0.81733	1.82258	0.82813
1.81109	0.80804	1.81109	0.81724	1.81109	0.82804
1.82654	0.80791	1.82654	0.81711	1.82654	0.82791
1.82081	0.80782	1.82081	0.81702	1.82081	0.82783
1.82533	0.80774	1.82533	0.81694	1.82533	0.82774
1.82576	0.80752	1.82576	0.81672	1.82576	0.82752
1.81789	0.80747	1.81789	0.81667	1.81789	0.82747
1.81572	0.8073	1.81572	0.8165	1.81572	0.8273
1.83685	0.80721	1.83685	0.81641	1.83685	0.82721
1.82361	0.80712	1.82361	0.81632	1.82361	0.82712
1.82808	0.80695	1.82808	0.81615	1.82808	0.82695
1.84797	0.80686	1.84797	0.81606	1.84797	0.82686
1.84911	0.80668	1.84911	0.81588	1.84911	0.82668
1.8353	0.80664	1.8353	0.81584	1.8353	0.82664
1.85086	0.80655	1.85086	0.81575	1.85086	0.82655
1.85246	0.80638	1.85246	0.81558	1.85246	0.82638
1.84286	0.80633	1.84286	0.81553	1.84286	0.82633
1.84079	0.80611	1.84079	0.81531	1.84079	0.82611
1.84972	0.80603	1.84972	0.81523	1.84972	0.82603
1.84193	0.8059	1.84193	0.8151	1.84193	0.8259
1.85587	0.80581	1.85587	0.81501	1.85587	0.82581
1.83972	0.80572	1.83972	0.81492	1.83972	0.82572
1.84301	0.80559	1.84301	0.81479	1.84301	0.82559
1.86099	0.8055	1.86099	0.8147	1.86099	0.8255
1.84575	0.80541	1.84575	0.81461	1.84575	0.82541
1.8507	0.80519	1.8507	0.81439	1.8507	0.82519
1.86731	0.80515	1.86731	0.81435	1.86731	0.82515
1.87581	0.80497	1.87581	0.81417	1.87581	0.82497
1.86214	0.80489	1.86214	0.81409	1.86214	0.82489
1.87165	0.80475	1.87165	0.81395	1.87165	0.82475
1.86884	0.80467	1.86884	0.81387	1.86884	0.82467
1.87626	0.80458	1.87626	0.81378	1.87626	0.82458
1.88136	0.8044	1.88136	0.8136	1.88136	0.8244
1.85994	0.80432	1.85994	0.81352	1.85994	0.82432
1.88227	0.80423	1.88227	0.81343	1.88227	0.82423
1.88424	0.8041	1.88424	0.8133	1.88424	0.8241
1.87076	0.80401	1.87076	0.81321	1.87076	0.82401
1.87216	0.80383	1.87216	0.81303	1.87216	0.82383
1.89294	0.80375	1.89294	0.81295	1.89294	0.82375
1.88288	0.80361	1.88288	0.81281	1.88288	0.82361
1.89184	0.80353	1.89184	0.81273	1.89184	0.82353
1.88506	0.80344	1.88506	0.81264	1.88506	0.82344
1.88271	0.80331	1.88271	0.81251	1.88271	0.82331
1.90152	0.80322	1.90152	0.81242	1.90152	0.82322
1.90665	0.80304	1.90665	0.81224	1.90665	0.82304
1.89324	0.80296	1.89324	0.81216	1.89324	0.82296
1.90345	0.80287	1.90345	0.81207	1.90345	0.82287
1.9057	0.80269	1.9057	0.81189	1.9057	0.82269
1.90953	0.80265	1.90953	0.81185	1.90953	0.82265
1.91437	0.80247	1.91437	0.81167	1.91437	0.82247
1.89871	0.80239	1.89871	0.81159	1.89871	0.82239
1.91705	0.80234	1.91705	0.81154	1.91705	0.82234
1.92155	0.80217	1.92155	0.81137	1.92155	0.82217
1.90764	0.80208	1.90764	0.81128	1.90764	0.82208
1.92562	0.80195	1.92562	0.81115	1.92562	0.82195
1.90539	0.80186	1.90539	0.81106	1.90539	0.82186
1.92975	0.80177	1.92975	0.81097	1.92975	0.82177
1.92611	0.8016	1.92611	0.8108	1.92611	0.8216
1.90992	0.80155	1.90992	0.81075	1.90992	0.82155
1.91484	0.80138	1.91484	0.81058	1.91484	0.82138
1.93045	0.80129	1.93045	0.81049	1.93045	0.82129
1.92033	0.8012	1.92033	0.8104	1.92033	0.8212
1.93669	0.80107	1.93669	0.81027	1.93669	0.82107
1.9225	0.80098	1.9225	0.81018	1.9225	0.82098
1.94152	0.80089	1.94152	0.81009	1.94152	0.82089
1.94047	0.80076	1.94047	0.80996	1.94047	0.82076
1.92575	0.80068	1.92575	0.80988	1.92575	0.82068
1.93199	0.8005	1.93199	0.8097	1.93199	0.8205
1.93055	0.80046	1.93055	0.80966	1.93055	0.82046
1.93707	0.80028	1.93707	0.80948	1.93707	0.82028
1.9547	0.80019	1.9547	0.80939	1.9547	0.82019
1.9395	0.80015	1.9395	0.80935	1.9395	0.82015
1.94695	0.79997	1.94695	0.80917	1.94695	0.81997
1.95176	0.79993	1.95176	0.80913	1.95176	0.81993
1.94818	0.79975	1.94818	0.80895	1.94818	0.81975
1.96444	0.79971	1.96444	0.80891	1.96444	0.81971
1.9527	0.79962	1.9527	0.80882	1.9527	0.81962
1.96451	0.79949	1.96451	0.80869	1.96451	0.81949
1.95981	0.7994	1.95981	0.8086	1.95981	0.8194
1.95621	0.79923	1.95621	0.80843	1.95621	0.81923
1.97448	0.79914	1.97448	0.80834	1.97448	0.81914
1.95452	0.7991	1.95452	0.8083	1.95452	0.8191
1.96078	0.79892	1.96078	0.80812	1.96078	0.81892
1.96373	0.79888	1.96373	0.80808	1.96373	0.81888
1.95941	0.79875	1.95941	0.80795	1.95941	0.81875
1.97931	0.79866	1.97931	0.80786	1.97931	0.81866
1.97179	0.79853	1.97179	0.80773	1.97179	0.81853
1.97469	0.79844	1.97469	0.80764	1.97469	0.81844
1.97108	0.79835	1.97108	0.80755	1.97108	0.81835
1.96766	0.79822	1.96766	0.80742	1.96766	0.81822
1.98403	0.79813	1.98403	0.80733	1.98403	0.81813
1.98797	0.79796	1.98797	0.80716	1.98797	0.81796
1.97238	0.79787	1.97238	0.80707	1.97238	0.81787
1.97648	0.79783	1.97648	0.80702	1.97648	0.81782
1.97911	0.79765	1.97911	0.80685	1.97911	0.81765
1.99629	0.79756	1.99629	0.80676	1.99629	0.81756
1.99677	0.79743	1.99677	0.80663	1.99677	0.81743
1.98572	0.79734	1.98572	0.80654	1.98572	0.81734
2.00221	0.79721	2.00221	0.80641	2.00221	0.81721
1.9859	0.79717	1.9859	0.80637	1.9859	0.81717
2.00665	0.79708	2.00665	0.80628	2.00665	0.81708
2.00421	0.7969	2.00421	0.8061	2.00421	0.8169
2.00055	0.79686	2.00055	0.80606	2.00055	0.81686
1.99537	0.79677	1.99537	0.80597	1.99537	0.81677
1.99252	0.7966	1.99252	0.8058	1.99252	0.8166
2.01224	0.79601	2.01224	0.80571	2.01224	0.81651
2.01025	0.79588	2.01025	0.80508	2.01025	0.81638
1.99942	0.79579	1.99942	0.80499	1.99942	0.81629
2.02085	0.79566	2.02085	0.80486	2.02085	0.81616
2.00459	0.79557	2.00459	0.80477	2.00459	0.81557
2.02516	0.79553	2.02516	0.80473	2.02516	0.81553
2.02497	0.79535	2.02497	0.80455	2.02497	0.81535
2.02024	0.79531	2.02024	0.80451	2.02024	0.81531
2.01682	0.79522	2.01682	0.80442	2.01682	0.81522
2.01457	0.79504	2.01457	0.80424	2.01457	0.81504
2.02972	0.795	2.02972	0.8042	2.02972	0.815
2.02712	0.79482	2.02712	0.80402	2.02712	0.81482
2.02697	0.79478	2.02697	0.80398	2.02697	0.81478
2.03959	0.79465	2.03959	0.80385	2.03959	0.81465
2.02329	0.79456	2.02329	0.80376	2.02329	0.81456
2.03946	0.79443	2.03946	0.80363	2.03946	0.81443
2.0238	0.79434	2.0238	0.80354	2.0238	0.81434
2.04056	0.7943	2.04056	0.8035	2.04056	0.8143
2.04487	0.79412	2.04487	0.80332	2.04487	0.81412
2.0468	0.79408	2.0468	0.80328	2.0468	0.81408
2.04997	0.7939	2.04997	0.8031	2.04997	0.8139
2.03284	0.79386	2.03284	0.80306	2.03284	0.81386
2.04878	0.79373	2.04878	0.80293	2.04878	0.81373
2.03671	0.79364	2.03671	0.80284	2.03671	0.81364
2.03967	0.79351	2.03967	0.80271	2.03967	0.81351
2.05139	0.79347	2.05139	0.80267	2.05139	0.81347
2.04557	0.79329	2.04557	0.80249	2.04557	0.81329
2.06311	0.7932	2.06311	0.8024	2.06311	0.8132
2.05591	0.79311	2.05591	0.80231	2.05591	0.81311
2.05883	0.79303	2.05883	0.80223	2.05883	0.81303
2.05092	0.79294	2.05092	0.80214	2.05092	0.81294
2.0519	0.79281	2.0519	0.80201	2.0519	0.81281
2.0601	0.79276	2.0601	0.80196	2.0601	0.81276
2.05288	0.79259	2.05288	0.80179	2.05288	0.81259
2.05719	0.79246	2.05719	0.80166	2.05719	0.81246
2.06129	0.79241	2.06129	0.80161	2.06129	0.81241
2.05698	0.79228	2.05698	0.80148	2.05698	0.81228
2.07388	0.79219	2.07388	0.80139	2.07388	0.81219
2.06162	0.79211	2.06162	0.80131	2.06162	0.81211
2.07854	0.79197	2.07854	0.80117	2.07854	0.81197
2.06443	0.79193	2.06443	0.80113	2.06443	0.81193
2.0708	0.79175	2.0708	0.80095	2.0708	0.81175
2.07836	0.79171	2.07836	0.80091	2.07836	0.81171
2.0751	0.79158	2.0751	0.80078	2.0751	0.81158
2.09113	0.79149	2.09113	0.80069	2.09113	0.81149
2.08652	0.79136	2.08652	0.80056	2.08652	0.81136
2.09956	0.79127	2.09956	0.80047	2.09956	0.81127
2.09425	0.79118	2.09425	0.80038	2.09425	0.81118
2.10063	0.7911	2.10063	0.8003	2.10063	0.8111
2.10544	0.79097	2.10544	0.80017	2.10544	0.81097
2.09751	0.79092	2.09751	0.80012	2.09751	0.81092
2.09529	0.79083	2.09529	0.80003	2.09529	0.81083
2.09244	0.7907	2.09244	0.7999	2.09244	0.8107
2.10128	0.79066	2.10128	0.79986	2.10128	0.81066
2.099	0.79048	2.099	0.79968	2.099	0.81048
2.11474	0.79044	2.11474	0.79964	2.11474	0.81044
2.1037	0.79031	2.1037	0.79951	2.1037	0.81031
2.12044	0.79022	2.12044	0.79942	2.12044	0.81022
2.11752	0.79009	2.11752	0.79929	2.11752	0.81009
2.12026	0.79004	2.12026	0.79924	2.12026	0.81004
2.12328	0.78991	2.12328	0.79911	2.12328	0.80991
2.10304	0.78982	2.10304	0.79902	2.10304	0.80982
2.12542	0.78969	2.12542	0.79889	2.12542	0.80969
2.10915	0.78965	2.10915	0.79885	2.10915	0.80965
2.12858	0.78956	2.12858	0.79876	2.12858	0.80956
2.1123	0.78943	2.1123	0.79863	2.1123	0.80943
2.13152	0.78939	2.13152	0.79859	2.13152	0.80939
2.13487	0.78921	2.13487	0.79841	2.13487	0.80921
2.12712	0.78912	2.12712	0.79832	2.12712	0.80912
2.13855	0.78904	2.13855	0.79824	2.13855	0.80904
2.1208	0.78895	2.1208	0.79815	2.1208	0.80895
2.12896	0.7889	2.12896	0.7981	2.12896	0.8084
2.12668	0.78877	2.12668	0.79797	2.12668	0.80827
2.14528	0.78868	2.14528	0.79788	2.14528	0.80818
2.1356	0.78855	2.1356	0.79775	2.1356	0.80805
2.13397	0.78842	2.13397	0.79762	2.13397	0.80792
2.1428	0.78838	2.1428	0.79758	2.1428	0.80788
2.15502	0.78829	2.15502	0.79749	2.15502	0.80779
2.14876	0.78816	2.14876	0.79736	2.14876	0.80766
2.15034	0.78811	2.15034	0.79731	2.15034	0.80761
2.15684	0.78798	2.15684	0.79718	2.15684	0.80748
2.15018	0.78794	2.15018	0.79714	2.15018	0.80744
2.16262	0.78776	2.16262	0.79696	2.16262	0.80726
2.14452	0.78772	2.14452	0.79692	2.14452	0.80722
2.16444	0.78759	2.16444	0.79679	2.16444	0.80709
2.15058	0.78754	2.15058	0.79674	2.15058	0.80704
2.1714	0.78741	2.1714	0.79661	2.1714	0.80691
2.15337	0.78737	2.15337	0.79657	2.15337	0.80687
2.15919	0.78719	2.15919	0.79639	2.15919	0.80669
2.1613	0.78715	2.1613	0.79635	2.1613	0.80665
2.15544	0.78702	2.15544	0.79622	2.15544	0.80652
2.16281	0.78697	2.16281	0.79617	2.16281	0.80647
2.15916	0.78684	2.15916	0.79604	2.15916	0.80634
2.17385	0.78675	2.17385	0.79595	2.17385	0.80625
2.15983	0.78662	2.15983	0.79582	2.15983	0.80612
2.1819	0.78658	2.1819	0.79578	2.1819	0.80608
2.1697	0.78645	2.1697	0.79565	2.1697	0.80595
2.18157	0.78636	2.18157	0.79556	2.18157	0.80586
2.17035	0.78627	2.17035	0.79547	2.17035	0.80577
2.17804	0.78618	2.17804	0.79538	2.17804	0.80568
2.18816	0.78605	2.18816	0.79525	2.18816	0.80555
2.17024	0.78597	2.17024	0.79517	2.17024	0.80547
2.1903	0.78588	2.1903	0.79508	2.1903	0.80538
2.17359	0.78579	2.17359	0.79499	2.17359	0.80529
2.19322	0.7857	2.19322	0.7949	2.19322	0.8052
2.17923	0.78557	2.17923	0.79477	2.17923	0.80507
2.1949	0.78553	2.1949	0.79473	2.1949	0.80503
2.18899	0.7854	2.18899	0.7946	2.18899	0.8049
2.19897	0.78535	2.19897	0.79455	2.19897	0.80485
2.19554	0.78518	2.19554	0.79438	2.19554	0.80468
2.19732	0.78513	2.19732	0.79433	2.19732	0.80463
2.20887	0.785	2.20887	0.7942	2.20887	0.8045
2.19405	0.78491	2.19405	0.79411	2.19405	0.80441
2.2064	0.78478	2.2064	0.79398	2.2064	0.80428
2.19126	0.78474	2.19126	0.79394	2.19126	0.80424
2.20497	0.78461	2.20497	0.79381	2.20497	0.80411
2.19291	0.78452	2.19291	0.79372	2.19291	0.80402
2.20735	0.78443	2.20735	0.79363	2.20735	0.80393
2.20225	0.78434	2.20225	0.79354	2.20225	0.80384
2.21765	0.78425	2.21765	0.79345	2.21765	0.80375
2.20869	0.78417	2.20869	0.79337	2.20869	0.80367
2.22115	0.78408	2.22115	0.79328	2.22115	0.80358
2.22505	0.78395	2.22505	0.79315	2.22505	0.80345
2.21736	0.7839	2.21736	0.7931	2.21736	0.8034
2.2251	0.78377	2.2251	0.79297	2.2251	0.80327
2.21094	0.78368	2.21094	0.79288	2.21094	0.80318
2.22926	0.78355	2.22926	0.79275	2.22926	0.80305
2.21569	0.78351	2.21569	0.79271	2.21569	0.80301
2.2246	0.78338	2.2246	0.79258	2.2246	0.80288
2.2156	0.78329	2.2156	0.79249	2.2156	0.80279
2.22151	0.78316	2.22151	0.79236	2.22151	0.80266
2.22986	0.78311	2.22986	0.79231	2.22986	0.80261
2.22757	0.78298	2.22757	0.79218	2.22757	0.80248
2.23448	0.78294	2.23448	0.79214	2.23448	0.80244
2.22786	0.78276	2.22786	0.79196	2.22786	0.80226
2.24302	0.78272	2.24302	0.79192	2.24302	0.80222
2.23282	0.78259	2.23282	0.79179	2.23282	0.80209
2.25156	0.78254	2.25156	0.79174	2.25156	0.80204
2.24012	0.78241	2.24012	0.79161	2.24012	0.80191
2.25064	0.78232	2.25064	0.79152	2.25064	0.80182
2.23586	0.78228	2.23586	0.79148	2.23586	0.80178
2.24782	0.78215	2.24782	0.79135	2.24782	0.80165
2.23662	0.78206	2.23662	0.79126	2.23662	0.80156
2.23921	0.78193	2.23921	0.79113	2.23921	0.80143
2.24719	0.78189	2.24719	0.79109	2.24719	0.80139
2.24355	0.78175	2.24355	0.79095	2.24355	0.80125
2.25733	0.78167	2.25733	0.79087	2.25733	0.80117
2.24529	0.78158	2.24529	0.79078	2.24529	0.80108
2.2627	0.78149	2.2627	0.79069	2.2627	0.80099
2.25729	0.78136	2.25729	0.79056	2.25729	0.80086
2.26848	0.78127	2.26848	0.79047	2.26848	0.80077
2.2643	0.78118	2.2643	0.78988	2.2643	0.80068
2.26884	0.7811	2.26884	0.7898	2.26884	0.8006
2.25857	0.78101	2.25857	0.78971	2.25857	0.80051
2.27012	0.78092	2.27012	0.78962	2.27012	0.80042
2.26112	0.78083	2.26112	0.78953	2.26112	0.80033
2.26545	0.7807	2.26545	0.7894	2.26545	0.8002
2.27057	0.78066	2.27057	0.78936	2.27057	0.80016
2.26546	0.78053	2.26546	0.78923	2.26546	0.80003
2.28669	0.78044	2.28669	0.78914	2.28669	0.79994
2.27297	0.78035	2.27297	0.78905	2.27297	0.79985
2.28885	0.78026	2.28885	0.78896	2.28885	0.79976
2.2828	0.78013	2.2828	0.78883	2.2828	0.79963
2.29254	0.78009	2.29254	0.78879	2.29254	0.79959
2.28577	0.77996	2.28577	0.78866	2.28577	0.79946
2.2964	0.77987	2.2964	0.78857	2.2964	0.79937
2.28836	0.77978	2.28836	0.78848	2.28836	0.79928
2.2975	0.77969	2.2975	0.78839	2.2975	0.79919
2.3034	0.77956	2.3034	0.78826	2.3034	0.79906
2.29881	0.77952	2.29881	0.78822	2.29881	0.79902
2.31246	0.77939	2.31246	0.78809	2.31246	0.79889
2.30414	0.77934	2.30414	0.78804	2.30414	0.79884
2.31528	0.77921	2.31528	0.78791	2.31528	0.79871
2.30827	0.77917	2.30827	0.78787	2.30827	0.79867
2.30577	0.77908	2.30577	0.78778	2.30577	0.79858
2.30282	0.77895	2.30282	0.78765	2.30282	0.79845
2.30884	0.7789	2.30884	0.7876	2.30884	0.7984
2.30552	0.77877	2.30552	0.78747	2.30552	0.79827
2.31273	0.77868	2.31273	0.78738	2.31273	0.79818
2.30729	0.7786	2.30729	0.7873	2.30729	0.7981
2.3173	0.77855	2.3173	0.78725	2.3173	0.79805
2.31312	0.77842	2.31312	0.78712	2.31312	0.79792
2.32229	0.77838	2.32229	0.78708	2.32229	0.79788
2.31591	0.77825	2.31591	0.78695	2.31591	0.79775
2.33387	0.77816	2.33387	0.78686	2.33387	0.79766
2.3205	0.77807	2.3205	0.78677	2.3205	0.79757
2.33776	0.77798	2.33776	0.78668	2.33776	0.79748
2.32249	0.77785	2.32249	0.78655	2.32249	0.79735
2.33903	0.77781	2.33903	0.78651	2.33903	0.79731
2.32304	0.77768	2.32304	0.78638	2.32304	0.79718
2.34179	0.77763	2.34179	0.78633	2.34179	0.79713
2.32933	0.7775	2.32933	0.7862	2.32933	0.797
2.35046	0.77746	2.35046	0.78616	2.35046	0.79696
2.33797	0.77732	2.33797	0.78602	2.33797	0.79683
2.34834	0.77728	2.34834	0.78598	2.34834	0.79678
2.33517	0.77715	2.33517	0.78585	2.33517	0.79665
2.34638	0.77706	2.34638	0.78576	2.34638	0.79656
2.33823	0.77697	2.33823	0.78567	2.33823	0.79647
2.34895	0.77689	2.34895	0.78559	2.34895	0.79639
2.33399	0.77684	2.33399	0.78554	2.33399	0.79634
2.35082	0.77671	2.35082	0.78541	2.35082	0.79621
2.33378	0.77667	2.33378	0.78537	2.33378	0.79617
2.34636	0.77649	2.34636	0.78519	2.34636	0.79599
2.34723	0.77645	2.34723	0.78515	2.34723	0.79595
2.34411	0.77632	2.34411	0.78502	2.34411	0.79582
2.3483	0.77627	2.3483	0.78497	2.3483	0.79577
2.34652	0.77614	2.34652	0.78484	2.34652	0.79564
2.36544	0.77605	2.36544	0.78475	2.36544	0.79555
2.353	0.77596	2.353	0.78466	2.353	0.79546
2.36909	0.77588	2.36909	0.78458	2.36909	0.79538
2.35284	0.77579	2.35284	0.78449	2.35284	0.79529
2.36917	0.7757	2.36917	0.7844	2.36917	0.7952
2.36377	0.77557	2.36377	0.78427	2.36377	0.79507
2.37719	0.77553	2.37719	0.78423	2.37719	0.79503
2.36486	0.7754	2.36486	0.7841	2.36486	0.7949
2.37592	0.77535	2.37592	0.78405	2.37592	0.79485
2.36439	0.77526	2.36439	0.78396	2.36439	0.79476
[truncated: 10,594 more rows]

## Sheet: 10-15mm，Stress-compation
Stress	SP5-10(3)	Stress	SP5-10(5)	Stress	SP5-10(7)
0	1	0	1	0	1
0.10064	0.97167	0.10131	0.97152	0.10032	0.97739
0.10018	0.97167	0.10076	0.97152	0.10082	0.97739
0.10046	0.97167	0.10094	0.97152	0.10132	0.97739
0.10113	0.97162	0.10135	0.97152	0.10104	0.97739
0.10136	0.97162	0.10256	0.97147	0.09941	0.97735
0.10045	0.97162	0.10242	0.97147	0.09959	0.97735
0.10192	0.97162	0.10106	0.97147	0.10064	0.97735
0.10431	0.97158	0.10064	0.97147	0.10018	0.97735
0.10203	0.97158	0.10018	0.97147	0.10046	0.97735
0.10274	0.97158	0.09917	0.97143	0.10113	0.9773
0.1026	0.97158	0.09985	0.97143	0.10136	0.9773
0.10132	0.97158	0.10053	0.97143	0.10045	0.9773
0.10283	0.97153	0.10031	0.97143	0.10192	0.9773
0.10205	0.97153	0.09986	0.97143	0.10431	0.97726
0.10215	0.97153	0.10127	0.97139	0.10203	0.97726
0.10318	0.97153	0.10085	0.97139	0.10274	0.97726
0.10265	0.97153	0.10122	0.97139	0.1026	0.97726
0.09373	0.97149	0.10182	0.97139	0.10132	0.97726
0.10201	0.97149	0.1026	0.97139	0.10283	0.97722
0.10201	0.97149	0.10283	0.97134	0.10205	0.97722
0.10364	0.97149	0.10275	0.97134	0.10215	0.97722
0.10344	0.97149	0.10388	0.97134	0.10318	0.97722
0.10321	0.97144	0.10396	0.97134	0.10265	0.97722
0.10371	0.97144	0.10383	0.9713	0.09373	0.97717
0.10383	0.97144	0.10265	0.9713	0.10201	0.97717
0.10439	0.97144	0.1041	0.9713	0.10201	0.97717
0.11469	0.9714	0.10346	0.9713	0.10364	0.97717
0.10406	0.9714	0.10261	0.9713	0.10344	0.97717
0.10411	0.9714	0.09432	0.97125	0.10321	0.97713
0.1048	0.9714	0.10374	0.97125	0.10371	0.97713
0.10362	0.9714	0.10302	0.97125	0.10383	0.97713
0.10408	0.97135	0.10306	0.97125	0.10439	0.97713
0.10434	0.97135	0.1022	0.97125	0.11469	0.97708
0.10433	0.97135	0.10385	0.97121	0.10406	0.97708
0.10494	0.97135	0.10351	0.97121	0.10411	0.97708
0.10604	0.97135	0.10371	0.97121	0.1048	0.97708
0.09605	0.97131	0.10387	0.97121	0.10362	0.97708
0.10375	0.97131	0.10433	0.97121	0.10408	0.97704
0.10413	0.97131	0.10761	0.97116	0.10434	0.97704
0.10329	0.97131	0.10407	0.97116	0.10433	0.97704
0.1052	0.97131	0.1047	0.97116	0.10494	0.97704
0.10517	0.97126	0.10399	0.97116	0.10604	0.97704
0.10434	0.97126	0.10429	0.97112	0.09605	0.97699
0.10456	0.97126	0.10457	0.97112	0.10375	0.97699
0.10443	0.97126	0.10457	0.97112	0.10413	0.97699
0.10442	0.97126	0.10274	0.97112	0.10329	0.97699
0.10572	0.97122	0.10428	0.97112	0.1052	0.97699
0.10631	0.97122	0.09756	0.97108	0.10517	0.97695
0.10511	0.97122	0.10497	0.97108	0.10434	0.97695
0.10646	0.97122	0.1053	0.97108	0.10456	0.97695
0.10603	0.97117	0.10494	0.97108	0.10443	0.97695
0.10494	0.97117	0.10451	0.97108	0.10442	0.97695
0.10581	0.97117	0.10511	0.97103	0.10572	0.9769
0.10563	0.97117	0.1046	0.97103	0.10631	0.9769
0.10544	0.97117	0.10598	0.97103	0.10511	0.9769
0.09941	0.97113	0.1052	0.97103	0.10646	0.9769
0.10452	0.97113	0.1053	0.97103	0.10603	0.97686
0.10634	0.97113	0.11555	0.97099	0.10494	0.97686
0.10536	0.97113	0.10583	0.97099	0.10581	0.97686
0.10623	0.97113	0.1057	0.97099	0.10563	0.97686
0.10594	0.97108	0.1048	0.97099	0.10544	0.97686
0.10655	0.97108	0.10521	0.97094	0.09941	0.97681
0.10548	0.97108	0.10415	0.97094	0.10452	0.97681
0.10536	0.97108	0.10577	0.97094	0.10634	0.97681
0.10699	0.97108	0.10576	0.97094	0.10536	0.97681
0.11762	0.97104	0.10626	0.97094	0.10623	0.97681
0.10801	0.97104	0.09624	0.9709	0.10594	0.97677
0.10828	0.97104	0.10182	0.9709	0.10655	0.97677
0.10815	0.97104	0.10378	0.9709	0.10548	0.97677
0.1074	0.97104	0.10584	0.9709	0.10536	0.97677
0.10787	0.97099	0.10419	0.9709	0.10699	0.97677
0.10824	0.97099	0.1054	0.9709	0.11762	0.97672
0.10796	0.97099	0.10411	0.97086	0.10801	0.97672
0.10767	0.97099	0.10376	0.97086	0.10828	0.97672
0.10818	0.97099	0.10606	0.97086	0.10815	0.97672
0.10823	0.97095	0.10512	0.97086	0.1074	0.97672
0.10772	0.97095	0.11476	0.97081	0.10787	0.97668
0.10759	0.97095	0.10553	0.97081	0.10824	0.97668
0.10814	0.97095	0.10667	0.97081	0.10796	0.97668
0.10936	0.9709	0.10621	0.97081	0.10767	0.97668
0.10814	0.9709	0.10648	0.97081	0.10818	0.97668
0.10915	0.9709	0.10612	0.97077	0.10823	0.97663
0.10804	0.9709	0.1059	0.97077	0.10772	0.97663
0.10911	0.9709	0.10576	0.97077	0.10759	0.97663
0.11935	0.97086	0.1048	0.97077	0.10814	0.97663
0.10924	0.97086	0.10698	0.97077	0.10936	0.97659
0.10968	0.97086	0.10439	0.97072	0.10814	0.97659
0.10992	0.97086	0.10479	0.97072	0.10915	0.97659
0.10809	0.97086	0.10451	0.97072	0.10804	0.97659
0.10855	0.97081	0.10469	0.97072	0.10911	0.97659
0.10828	0.97081	0.10551	0.97072	0.11935	0.97654
0.10805	0.97081	0.10485	0.97068	0.10924	0.97654
0.10966	0.97081	0.10437	0.97068	0.10968	0.97654
0.11001	0.97081	0.10507	0.97068	0.10992	0.97654
0.10898	0.97077	0.10462	0.97068	0.10809	0.97654
0.1081	0.97077	0.11183	0.97064	0.10855	0.9765
0.10934	0.97077	0.10712	0.97064	0.10828	0.9765
0.10915	0.97077	0.10693	0.97064	0.10805	0.9765
0.1095	0.97077	0.10667	0.97064	0.10966	0.9765
0.10973	0.97072	0.10598	0.97064	0.11001	0.9765
0.10997	0.97072	0.10657	0.97059	0.10898	0.97645
0.10847	0.97072	0.10593	0.97059	0.1081	0.97645
0.10932	0.97072	0.10584	0.97059	0.10934	0.97645
0.11838	0.97068	0.1062	0.97059	0.10915	0.97645
0.10992	0.97068	0.10635	0.97059	0.1095	0.97645
0.10892	0.97068	0.09716	0.97055	0.10973	0.97641
0.10879	0.97068	0.10525	0.97055	0.10997	0.97641
0.10943	0.97068	0.10588	0.97055	0.10847	0.97641
0.10983	0.97063	0.10548	0.97055	0.10932	0.97641
0.1098	0.97063	0.10526	0.97055	0.11838	0.97636
0.10906	0.97063	0.10611	0.9705	0.10992	0.97636
0.10865	0.97063	0.10567	0.9705	0.10892	0.97636
0.10846	0.97063	0.10443	0.9705	0.10879	0.97636
0.10603	0.97059	0.10593	0.9705	0.10943	0.97636
0.10553	0.97059	0.10635	0.9705	0.10983	0.97632
0.10563	0.97059	0.11608	0.97046	0.1098	0.97632
0.1059	0.97059	0.10745	0.97046	0.10906	0.97632
0.10692	0.97059	0.10693	0.97046	0.10865	0.97632
0.10567	0.97054	0.10816	0.97046	0.10846	0.97632
0.10726	0.97054	0.10676	0.97042	0.10603	0.97627
0.10576	0.97054	0.10876	0.97042	0.10553	0.97627
0.10657	0.97054	0.108	0.97042	0.10563	0.97627
0.11121	0.9705	0.10763	0.97042	0.1059	0.97627
0.10731	0.9705	0.10873	0.97042	0.10692	0.97627
0.10668	0.9705	0.10685	0.97042	0.10567	0.97623
0.10721	0.9705	0.10685	0.97037	0.10726	0.97623
0.10694	0.9705	0.10847	0.97037	0.10576	0.97623
0.10745	0.97045	0.10649	0.97037	0.10657	0.97623
0.10744	0.97045	0.10677	0.97037	0.11121	0.97618
0.10687	0.97045	0.10789	0.97037	0.10731	0.97618
0.10712	0.97045	0.1069	0.97033	0.10668	0.97618
0.10715	0.97045	0.10851	0.97033	0.10721	0.97618
0.10594	0.97045	0.108	0.97033	0.10694	0.97618
0.10597	0.97041	0.10795	0.97033	0.10745	0.97614
0.10591	0.97041	0.10814	0.97033	0.10744	0.97614
0.10712	0.97041	0.1083	0.97028	0.10687	0.97614
0.10544	0.97041	0.10842	0.97028	0.10712	0.97614
0.10457	0.97041	0.10662	0.97028	0.10715	0.97614
0.1054	0.97036	0.10896	0.97028	0.10594	0.97614
0.10611	0.97036	0.10842	0.97024	0.10597	0.97609
0.10645	0.97036	0.10621	0.97024	0.10591	0.97609
0.10722	0.97036	0.10736	0.97024	0.10712	0.97609
0.11734	0.97032	0.10741	0.97024	0.10544	0.97609
0.10741	0.97032	0.10681	0.97024	0.10457	0.97609
0.10768	0.97032	0.09656	0.9702	0.1054	0.97605
0.10806	0.97032	0.10625	0.9702	0.10611	0.97605
0.10787	0.97032	0.10644	0.9702	0.10645	0.97605
0.10713	0.97027	0.10616	0.9702	0.10722	0.97605
0.10893	0.97027	0.10549	0.9702	0.11734	0.976
0.10819	0.97027	0.10508	0.97015	0.10741	0.976
0.1066	0.97027	0.10498	0.97015	0.10768	0.976
0.10182	0.97023	0.10537	0.97015	0.10806	0.976
0.09757	0.97023	0.1053	0.97015	0.10787	0.976
0.10634	0.97023	0.10563	0.97015	0.10713	0.97596
0.10632	0.97023	0.11511	0.97011	0.10893	0.97596
0.10752	0.97023	0.10373	0.97011	0.10819	0.97596
0.108	0.97023	0.10484	0.97011	0.1066	0.97596
0.10845	0.97018	0.10507	0.97011	0.10182	0.97592
0.1086	0.97018	0.10531	0.97011	0.09757	0.97592
0.10818	0.97018	0.10607	0.97006	0.10634	0.97592
0.10682	0.97018	0.10503	0.97006	0.10632	0.97592
0.10769	0.97018	0.10579	0.97006	0.10752	0.97592
0.10918	0.97014	0.10489	0.97006	0.108	0.97592
0.11022	0.97014	0.09354	0.97002	0.10845	0.97587
0.10987	0.97014	0.10382	0.97002	0.1086	0.97587
0.10915	0.97014	0.1047	0.97002	0.10818	0.97587
0.1093	0.97009	0.10479	0.97002	0.10682	0.97587
0.10901	0.97009	0.10388	0.97002	0.10769	0.97587
0.10966	0.97009	0.10443	0.96998	0.10918	0.97583
0.10962	0.97009	0.10521	0.96998	0.11022	0.97583
0.10842	0.97009	0.10479	0.96998	0.10987	0.97583
0.1014	0.97005	0.1054	0.96998	0.10915	0.97583
0.10841	0.97005	0.10512	0.96998	0.1093	0.97578
0.10838	0.97005	0.10576	0.96993	0.10901	0.97578
0.10874	0.97005	0.10652	0.96993	0.10966	0.97578
0.10828	0.97005	0.10576	0.96993	0.10962	0.97578
0.10906	0.97	0.10593	0.96993	0.10842	0.97578
0.10832	0.97	0.10471	0.96993	0.1014	0.97574
0.10932	0.97	0.10494	0.96989	0.10841	0.97574
0.1101	0.97	0.1047	0.96989	0.10838	0.97574
0.10982	0.97	0.10528	0.96989	0.10874	0.97574
0.11083	0.96996	0.10489	0.96989	0.10828	0.97574
0.10982	0.96996	0.10402	0.96989	0.10906	0.97569
0.11106	0.96996	0.10443	0.96984	0.10832	0.97569
0.10989	0.96996	0.10434	0.96984	0.10932	0.97569
0.10927	0.96996	0.10425	0.96984	0.1101	0.97569
0.11025	0.96991	0.10499	0.96984	0.10982	0.97569
0.11048	0.96991	0.10508	0.96984	0.11083	0.97565
0.10975	0.96991	0.10415	0.9698	0.10982	0.97565
0.11121	0.96991	0.10401	0.9698	0.11106	0.97565
0.10256	0.96987	0.10537	0.9698	0.10989	0.97565
0.10938	0.96987	0.10499	0.9698	0.10927	0.97565
0.10916	0.96987	0.10489	0.9698	0.11025	0.9756
0.10892	0.96987	0.10772	0.96975	0.11048	0.9756
0.11008	0.96987	0.106	0.96975	0.10975	0.9756
0.10978	0.96982	0.10721	0.96975	0.11121	0.9756
0.10997	0.96982	0.10708	0.96975	0.10256	0.97556
0.11022	0.96982	0.10686	0.96971	0.10938	0.97556
0.10962	0.96982	0.10671	0.96971	0.10916	0.97556
0.11085	0.96982	0.10676	0.96971	0.10892	0.97556
0.11986	0.96978	0.10736	0.96971	0.11008	0.97556
0.11195	0.96978	0.10616	0.96971	0.10978	0.97551
0.11103	0.96978	0.09735	0.96967	0.10997	0.97551
0.11043	0.96978	0.10438	0.96967	0.11022	0.97551
0.11144	0.96973	0.10461	0.96967	0.10962	0.97551
0.11071	0.96973	0.10567	0.96967	0.11085	0.97551
0.11017	0.96973	0.10646	0.96967	0.11986	0.97547
0.11102	0.96973	0.10545	0.96962	0.11195	0.97547
0.1107	0.96973	0.1062	0.96962	0.11103	0.97547
0.10448	0.96969	0.10658	0.96962	0.11043	0.97547
0.11089	0.96969	0.10694	0.96962	0.11144	0.97542
0.11172	0.96969	0.10558	0.96962	0.11071	0.97542
0.10939	0.96969	0.10845	0.96958	0.11017	0.97542
0.11066	0.96969	0.10753	0.96958	0.11102	0.97542
0.11112	0.96969	0.10676	0.96958	0.1107	0.97542
0.11024	0.96964	0.10931	0.96958	0.10448	0.97538
0.11117	0.96964	0.10835	0.96953	0.11089	0.97538
0.10918	0.96964	0.108	0.96953	0.11172	0.97538
0.11043	0.96964	0.10909	0.96953	0.10939	0.97538
0.11469	0.9696	0.10812	0.96953	0.11066	0.97538
0.11234	0.9696	0.10876	0.96953	0.11112	0.97538
0.11171	0.9696	0.10136	0.96949	0.11024	0.97533
0.11177	0.9696	0.10823	0.96949	0.11117	0.97533
0.11203	0.9696	0.1075	0.96949	0.10918	0.97533
0.11167	0.96955	0.10731	0.96949	0.11043	0.97533
0.1127	0.96955	0.10735	0.96949	0.11469	0.97529
0.11215	0.96955	0.10761	0.96945	0.11234	0.97529
0.11185	0.96955	0.10809	0.96945	0.11171	0.97529
0.10586	0.96951	0.10816	0.96945	0.11177	0.97529
0.11075	0.96951	0.10769	0.96945	0.11203	0.97529
0.11345	0.96951	0.10909	0.96945	0.11167	0.97524
0.11303	0.96951	0.11047	0.9694	0.1127	0.97524
0.11299	0.96951	0.11064	0.9694	0.11215	0.97524
0.11231	0.96951	0.10993	0.9694	0.11185	0.97524
0.11239	0.96946	0.11029	0.9694	0.10586	0.9752
0.11248	0.96946	0.11006	0.9694	0.11075	0.9752
0.11176	0.96946	0.11087	0.96936	0.11345	0.9752
0.11215	0.96946	0.1104	0.96936	0.11303	0.9752
0.11112	0.96946	0.10973	0.96936	0.11299	0.9752
0.11322	0.96942	0.10969	0.96936	0.11231	0.9752
0.11394	0.96942	0.11002	0.96936	0.11239	0.97515
0.11299	0.96942	0.10816	0.96931	0.11248	0.97515
0.11378	0.96942	0.1081	0.96931	0.11176	0.97515
0.11303	0.96937	0.10879	0.96931	0.11215	0.97515
0.11349	0.96937	0.10908	0.96931	0.11112	0.97515
0.11369	0.96937	0.10891	0.96931	0.11322	0.97511
0.11362	0.96937	0.10847	0.96927	0.11394	0.97511
0.11336	0.96937	0.10923	0.96927	0.11299	0.97511
0.11227	0.96933	0.1096	0.96927	0.11378	0.97511
0.11239	0.96933	0.10807	0.96927	0.11303	0.97506
0.11259	0.96933	0.11138	0.96923	0.11349	0.97506
0.11276	0.96933	0.11106	0.96923	0.11369	0.97506
0.11313	0.96933	0.10996	0.96923	0.11362	0.97506
0.1127	0.96928	0.11119	0.96923	0.11336	0.97506
0.11307	0.96928	0.11091	0.96923	0.11227	0.97502
0.11413	0.96928	0.10996	0.96918	0.11239	0.97502
0.11368	0.96928	0.10988	0.96918	0.11259	0.97502
0.11299	0.96928	0.11048	0.96918	0.11276	0.97502
0.1227	0.96924	0.1108	0.96918	0.11313	0.97502
0.1127	0.96924	0.11005	0.96918	0.1127	0.97497
0.11346	0.96924	0.10969	0.96914	0.11307	0.97497
0.11404	0.96924	0.1096	0.96914	0.11413	0.97497
0.11474	0.96924	0.1095	0.96914	0.11368	0.97497
0.11465	0.9692	0.10951	0.96914	0.11299	0.97497
0.11414	0.9692	0.11106	0.96914	0.1227	0.97493
0.11385	0.9692	0.11008	0.96909	0.1127	0.97493
0.11359	0.9692	0.10992	0.96909	0.11346	0.97493
0.11108	0.96915	0.10928	0.96909	0.11404	0.97493
0.11446	0.96915	0.10964	0.96909	0.11474	0.97493
0.11417	0.96915	0.11068	0.96909	0.11465	0.97488
0.11529	0.96915	0.11043	0.96905	0.11414	0.97488
0.11478	0.96915	0.11143	0.96905	0.11385	0.97488
0.11518	0.96911	0.1104	0.96905	0.11359	0.97488
0.11518	0.96911	0.11151	0.96905	0.11108	0.97484
0.11568	0.96911	0.11096	0.96901	0.11446	0.97484
0.11596	0.96911	0.10973	0.96901	0.11417	0.97484
0.12158	0.96906	0.10983	0.96901	0.11529	0.97484
0.1173	0.96906	0.10936	0.96901	0.11478	0.97484
0.1161	0.96906	0.11016	0.96901	0.11518	0.97479
0.11591	0.96906	0.10327	0.96896	0.11518	0.97479
0.11589	0.96906	0.10955	0.96896	0.11568	0.97479
0.11611	0.96902	0.10893	0.96896	0.11596	0.97479
0.11633	0.96902	0.10964	0.96896	0.12158	0.97475
0.11624	0.96902	0.11019	0.96896	0.1173	0.97475
0.1172	0.96902	0.10968	0.96892	0.1161	0.97475
0.11707	0.96902	0.11002	0.96892	0.11591	0.97475
0.10568	0.96897	0.10983	0.96892	0.11589	0.97475
0.11559	0.96897	0.11064	0.96892	0.11611	0.9747
0.1167	0.96897	0.10992	0.96892	0.11633	0.9747
0.1167	0.96897	0.11216	0.96887	0.11624	0.9747
0.11536	0.96897	0.11106	0.96887	0.1172	0.9747
0.11687	0.96893	0.11124	0.96887	0.11707	0.9747
0.11707	0.96893	0.11101	0.96887	0.10568	0.97466
0.11873	0.96893	0.1111	0.96887	0.11559	0.97466
0.11753	0.96893	0.11048	0.96883	0.1167	0.97466
0.11693	0.96893	0.11157	0.96883	0.1167	0.97466
0.12966	0.96888	0.11141	0.96883	0.11536	0.97466
0.11757	0.96888	0.11123	0.96883	0.11687	0.97461
0.1166	0.96888	0.10309	0.96879	0.11707	0.97461
0.11671	0.96888	0.11033	0.96879	0.11873	0.97461
0.11568	0.96888	0.11054	0.96879	0.11753	0.97461
0.11738	0.96884	0.1117	0.96879	0.11693	0.97461
0.11586	0.96884	0.11087	0.96879	0.12966	0.97457
0.1162	0.96884	0.11061	0.96874	0.11757	0.97457
0.11688	0.96884	0.1122	0.96874	0.1166	0.97457
0.11697	0.96884	0.11087	0.96874	0.11671	0.97457
0.10819	0.96879	0.11132	0.96874	0.11568	0.97457
0.1139	0.96879	0.11264	0.96874	0.11738	0.97453
0.11511	0.96879	0.11325	0.9687	0.11586	0.97453
0.1162	0.96879	0.11148	0.9687	0.1162	0.97453
0.11564	0.96879	0.11339	0.9687	0.11688	0.97453
0.11729	0.96879	0.11138	0.9687	0.11697	0.97453
0.11642	0.96875	0.1123	0.9687	0.10819	0.97448
0.11538	0.96875	0.11217	0.96865	0.1139	0.97448
0.11769	0.96875	0.11261	0.96865	0.11511	0.97448
0.11752	0.96875	0.11281	0.96865	0.1162	0.97448
0.11783	0.96875	0.11235	0.96865	0.11564	0.97448
0.1167	0.96875	0.102	0.96861	0.11729	0.97448
0.12082	0.9687	0.11106	0.96861	0.11642	0.97444
0.11767	0.9687	0.11134	0.96861	0.11538	0.97444
0.11797	0.9687	0.11211	0.96861	0.11769	0.97444
0.11718	0.9687	0.11179	0.96861	0.11752	0.97444
0.11679	0.9687	0.11285	0.96857	0.11783	0.97444
0.11706	0.96866	0.11325	0.96857	0.1167	0.97444
0.1178	0.96866	0.11198	0.96857	0.12082	0.97439
0.11749	0.96866	0.11138	0.96857	0.11767	0.97439
0.11804	0.96866	0.11229	0.96857	0.11797	0.97439
0.11834	0.96866	0.11588	0.96852	0.11718	0.97439
0.11936	0.96866	0.11361	0.96852	0.11679	0.97439
0.10829	0.96861	0.1143	0.96852	0.11706	0.97435
0.11824	0.96861	0.11457	0.96852	0.1178	0.97435
0.11718	0.96861	0.11334	0.96852	0.11749	0.97435
0.11811	0.96861	0.11395	0.96848	0.11804	0.97435
0.11847	0.96861	0.11421	0.96848	0.11834	0.97435
0.11857	0.96857	0.11325	0.96848	0.11936	0.97435
0.11875	0.96857	0.11422	0.96848	0.10829	0.9743
0.11856	0.96857	0.11435	0.96848	0.11824	0.9743
0.11848	0.96857	0.11235	0.96843	0.11718	0.9743
0.11945	0.96857	0.11339	0.96843	0.11811	0.9743
0.11958	0.96852	0.1128	0.96843	0.11847	0.9743
0.12935	0.96852	0.11311	0.96843	0.11857	0.97426
0.12036	0.96852	0.11216	0.96843	0.11875	0.97426
0.12032	0.96852	0.11292	0.96839	0.11856	0.97426
0.12017	0.96852	0.11188	0.96839	0.11848	0.97426
0.12164	0.96852	0.11289	0.96839	0.11945	0.97426
0.1179	0.96848	0.11389	0.96839	0.11958	0.97421
0.11921	0.96848	0.11979	0.96835	0.12935	0.97421
0.11958	0.96848	0.11471	0.96835	0.12036	0.97421
0.11986	0.96848	0.11504	0.96835	0.12032	0.97421
0.12027	0.96848	0.11525	0.96835	0.12017	0.97421
0.11024	0.96843	0.11516	0.96835	0.12164	0.97421
0.11847	0.96843	0.1164	0.9683	0.1179	0.97417
0.1193	0.96843	0.11544	0.9683	0.11921	0.97417
0.12009	0.96843	0.1162	0.9683	0.11958	0.97417
0.12071	0.96843	0.11523	0.9683	0.11986	0.97417
0.12089	0.96843	0.11532	0.9683	0.12027	0.97417
0.12099	0.96839	0.11379	0.96826	0.11024	0.97412
0.12229	0.96839	0.11417	0.96826	0.11847	0.97412
0.12032	0.96839	0.11481	0.96826	0.1193	0.97412
0.12106	0.96839	0.11516	0.96826	0.12009	0.97412
0.12149	0.96839	0.11518	0.96826	0.12071	0.97412
0.12219	0.96834	0.11569	0.96821	0.12089	0.97412
0.12152	0.96834	0.11557	0.96821	0.12099	0.97408
[truncated: 10,095 more rows]

## Sheet: 15-20mm，Stress-compation
Stress	SP5-10(3)	Stress	SP5-10(5)	Stress	SP5-10(7)
[truncated: 10,675 more rows]
